# Supplementary material for: Comparative morphological and transcriptomic analyses reveal chemosensory genes in the poultry red mite, Dermanyssus gallinae
Source: PubMed Central journal article supplement (PMC7578799; doi:10.1038/s41598-020-74998-7), 2020-10-21
Supplement: 41598_2020_74998_MOESM2_ESM.pdf [file 41598_2020_74998_MOESM2_ESM.pdf]

Comparative morphological and transcriptomic analyses reveal chemosensory genes in the poultry red mite, *Dermanyssus gallinae*

Biswajit Bhowmick<sup>1</sup>, Yu Tang<sup>1</sup>, Fang Lin<sup>1</sup>, Øivind Øines<sup>2</sup>, Jianguo Zhao<sup>1</sup>, Chenghong Liao<sup>1</sup>, Rickard Ignell<sup>3</sup>, Bill S. Hansson<sup>4</sup> and Qian Han<sup>1\*</sup>

<sup>1</sup>Laboratory of Tropical Veterinary Medicine and Vector Biology, School of Life and Pharmaceutical Sciences, Hainan University, Haikou, Hainan 570228, China.

<sup>2</sup>Norwegian Veterinary Institute, Ullevaalsveien 68 P.boks 750 Sentrum, 0106 Oslo, Norway.

<sup>3</sup>Disease Vector Group, Unit of Chemical Ecology, Department of Plant Protection Biology, Swedish University of Agricultural Sciences, Alnarp, Sweden

<sup>4</sup>Department of Evolutionary Neuroethology, Max Planck Institute for Chemical Ecology, 07745, Jena, Germany.

\*Correspondence: Qian Han Email: qianhan@hainanu.edu.cn

## **Supplementary Materials-2**

**Table S1.** Summary of the transcriptome sequencing data from *D. gallinae* samples.

| Sample        | Total raw reads<br>(Million) | Total clean reads<br>(Million) | Total Mapping (%) |
|---------------|------------------------------|--------------------------------|-------------------|
| F1 (Forelegs) | 24.02                        | 23.53                          | 72.51             |
| F2 (Forelegs) | 21.73                        | 21.49                          | 68.43             |
| F3 (Forelegs) | 21.73                        | 21.29                          | 67.16             |
| H1 (Hindlegs) | 21.74                        | 21.47                          | 69.06             |
| H2 (Hindlegs) | 21.75                        | 21.51                          | 65.82             |
| H3 (Hindlegs) | 21.72                        | 21.30                          | 73.56             |

**Table S2.** Protein sequences of IRs used to construct phylogenetic tree.

|                                                                                                                                                                                                                                                                                                                                                                                                                                                                                                                                                                                                                                                                                                                                                                                                                                                                                                                                                                                                                                                                                                                                                |
|------------------------------------------------------------------------------------------------------------------------------------------------------------------------------------------------------------------------------------------------------------------------------------------------------------------------------------------------------------------------------------------------------------------------------------------------------------------------------------------------------------------------------------------------------------------------------------------------------------------------------------------------------------------------------------------------------------------------------------------------------------------------------------------------------------------------------------------------------------------------------------------------------------------------------------------------------------------------------------------------------------------------------------------------------------------------------------------------------------------------------------------------|
| <p>&gt;TuIr25a ; XP_015792522.1 ionotropic receptor 25a-like [Tetranychus urticae]</p> <p>MIVINLLFLTLLINVQYCLTYLNDFIIGVVTPNGGFVERSFNAALEQLNLTISITSETKWIRGS<br/> NNTAVSDICDSLVRSHQYPSLIFDFTPQSVDNENGGQFSTAIKKYSRLSGTPTVSTSLSLGATKNP<br/> WNRLNSIENNYLIHLYRPGDVIPMIIQDIITLYNITEAVILHDQSFILDHKLTLGLLDKSTVDYDVK<br/> RLDADTLEDTMNELKASKVHNYFVLAKIANIDRILEMASSLGMRFADSWFMITKGRGQIKCD<br/> NCTHGSILLYQPSRVKSIEYDHSPGLNNISKEKRIDAFFIYDLVRLTLMSVDEMVKTNVWPINLT<br/> FPDCGKSLTTRQIDERKGLNLRDQMSLEGFFGLFGQFVISPSTTPNPLSNQLSDGFDQFIDYQEI<br/> MRVSKVELWNYQPFYRYLVSEWIAEPPRGRFILTGAIQAAASKPLYRIVTIQQPPFVMKWPNGTW<br/> YGYCIDLLEAIQDRLAEDKFDYELYESPDGKYGDKDPTTGKWDGIMGEIQSDKAQIGIGSVT<br/> VMAERESIVDFTVPYDVLVVISILMKKTTTPSHMFKFLT VLTNEVWLSVLVCYLATCAAMFIID<br/> RLSPYSYRNTKNKRKQNASRDFNLKECFWFCMTSLTPQGGGEAPINLSGRFVAAIWWIFGFV<br/> LVATYTANLAAFLT VSRDLDSPIDGLDKLVEQYRIRYAPVKDTLSMIYFKRMAYIEKKFYEIWKD<br/> MALDENLDKKERKGLTVWDYPLTQKYSNILKQIEMTGMPKTFEEGVARVKKSKNSAEGFALL<br/> ADATKIRYAAMTNCDLQQVGNFESRKPIALAVQENSPLKDKLSSAILKLLNLRKLESLKEKWW<br/> SNNPEKADCEDPKKASDGISIRNIGGVFIVISVGVVLACITLIWEHCIVKKFRKSSAKVSNVFRQ<br/> EIGKKESKL YNFPMPYNPKMKEKI</p> |
| <p>&gt;GoIr25a; XP_003743738.1 ionotropic receptor 25a [Galendromus occidentalis]</p> <p>MWSSPRSLSPASRGWNGVNRSSDPSWELVSAVITEKAFPIAKEAIERGLSRAKNDGKNIKWSF<br/> IELTNVELDHKKLCSMIMEKKPSLVINTVRTPGSNYYKLTMTIKEVLKNLGMPTLDLSYGISDE<br/> YMSGWSTKKGQGNLYLHVTPPGDSYTQAVRELSLMDLATA GILYDKTVLIDHKYARLLEN<br/> VPTRHIMREVGESAADFVNKTQVIQSTDVSNYFVVGSIHLSNALEVAKKYDLRQRHHCWVL<br/> VTKQEGEPSCDGCTNLEALFVHPVKVDDTRVGKEGYPYGADKLDGLFYEEISEYTVKRIFATEK<br/> YSKEPIVATCPGVGSARPNNLYAALNSAKLKGIVGDVDFDMKVGYYQQIRMKVEHLNFTTAK<br/> NRDTQDKGYFTYQGDANVAVWKEGQSSLEQYGAVTFYKVVTIVQPPFVYRNNETKKFRGYCI</p>                                                                                                                                                                                                                                                                                                                                                                                                                                                                                                                                                         |

DLIDEIKKILKFEYEIYEVADSHFGSKNKEGTWSGLIGDLVQKKADIALGPIAVMAERETVVDF  
VPYYDLVGLSILMKKPEVKPSLFKFLTVLETNVWGCILAAFFTSFLMFIFDRLSPYSYRNNKE  
KYKDDDEKREFTLKECLWFCMTSLTPQGGGEAPRNLSGRLVAATWWLFGFIIIASYTANLAAFL  
TVSRLESPIESLDDLSKQYKVKYAPQKDTTASTYFQRMANIEEKFYEIWKNMSLDDSLTDDQR  
AELAVWDYPVSDKFTKIWWTMQEANLPESFEAGVQRVKDSLSEGFADATQIKYATMTNC  
DLTQIGSEFSRKPLALAVQQNSPLRDQLSSAILKLLNQRRELSKETWWNQNSEKKECDEEGK  
NNDGISIKNIGGVFIVIFIGVVMACITLVFEYFWYKKNKPRSKVVSVKEHMPQKR

>TmIr25a; *Tropilaelaps mercedesae* IR25a mRNA for ionotropic receptor, complete cds  
(LC438511.1) Honey bee parasitic mites

MWVPLRISYLLVITLLLFENVLGQTLNIAVIVEKRFELARQAIDNGLKKAENDGKPIEWKFIVL  
DTEGETKGLCNMILANKPSLVINTVRTPGSNYKLTKAIKETLKNLAMP TLDSYGSTDEYQLS  
GWNKNTENERSYLIHVTPPGDSYTQAVRELSIRMDLATAGILYDKSVIIDHKYARLLENVPTRHI  
MREVSSESYADFENKTKVIQSTDVSNYFVVGTIQHLSNALEAAQKNNWKPRHHCWVLLTKQEG  
EPLCESCANHEVFFVHPVDADDKRVGTEGAYGNEKLDGMFYEEIAYYTVMRIFASPKYSKEPIT  
ASCAGESTARNDYNLTEALTSSKLQIRYGEVLFNTKHSRSGHQIIRMKVAHFNYTTAKVRQEN  
EKGYFVYSGDSTTWQKNEQSSMEQFGSVTFYRVVTIVQPPFVYEGNGTGPAFRGYCIDLLDEI  
KKILKFEYTVYGVEDKHFGSKNKDTGQWNGLIGDLVKKKAEIALGPIAVMAERETVVDFVTP  
YYDLVGLSILMKKPEIKPSLFKFLTVLETNVWGCILAAFFTSFLMFIFDRLSPYSYRNNKEKYK  
DDDEKREFTLKECLWFCMTSLTPQGGGEAPRNLSGRLVAATWWLFGFIIIASYTANLAAFLTVS  
RLESPIESLDDLSKQYKVKYAPQADTTASTYFFRMANIEEKFYEIWKNMSLDDSLTDDQRAELA  
VWDYPVSDKYTKIWWTMQEADLPKTFEEGVARVKNSSQGGDGFAFIADATQIKYATMTNCDLT  
QIGSEFSRKPLALAVQQNSPLRDQLSSAILKLLNQRKLESLKETWWNQNPCKNCDEGKNND  
GISIKNIGGVFIVIFIGVVMACITLVFEYFWYKKNKPRSKVVSVKDHMPQKK

>TmIr93a IR93a *Tropilaelaps mercedesae* IR93a mRNA for ionotropic receptor, complete cds  
(LC438512.1) Honey bee parasitic mites

MWPRLIFFASLAAGWRTRAEEIKAVVLPDSQIVVDEQDVRDFIFNRTGEYNATVGAAGYYISFL  
ATNIMSVSELNERVNPESNINLNLVIALDCDDTYKAMDVQMKKFPTSMIALNRPYCPRFD  
ADDQQVANKKPFALSIPVTQGP TDVLPILADFRAMLPLSRWSEITIIVPYSYTEEYLEQIMRAVE  
GVRSNDEVNSAASIAFWECPPSALADGNCGLNSES MKRILDSYRNNNDNKKVDREFFIIGDEEL  
VLDFFERGV DYGIFTLFREFFIILTTPYSDTIKDLIFEKIASFANIVIASTDVKDEDCPVSGTCHIDL  
PMNAYMNAVKNPDLFERNVDKFNH KYTIKKAVLTELRESKSCGFCSKYTIRTLTVKAGRKTF  
DPVAVWDYFDGLQMVEDTSRVS YQLFPRLGNMGGVNL RIGVIN EPPMTEVTSKEGRVISVNG  
TLVDLLKELARTLNFTYTFIMPPEPVPGLKQNDGRWSGLIGQLVRQETDLALYDFTPTPDRQSA  
VNFTVAFDEAPYKFLVPKPQPNYKYLFLDPFTWDTWLAVLGTVLIIGPILWCVHINSKFYDYD  
MRDGKGLFKLSNCEWYCFGAIQQGGIHL PDAISGRILVGFWWL FVIVTLT TYSGNLVADLTFP  
KIRNPFDTVDSLLNSHMSWGAFRGQAVIEILK LQQQGPLTKLSMKLTHIETAHEGWALKEVAD  
GNMALIGSEVTLYHYIGKQFIATGQCDYAVAKEEIIREIKVLAVRPGFPFLARFNTLLTRMVETGL  
VIRWKKKYWPKENECTVESK PQAGDIRRITIAHMEGSFWVLGAGFLISFLLGVELLRKRRELR  
DPQAGKRISPTDIKENLFRKTGHSDKSHYKTDYGAHGSAGPGGKGGQTGYSF DLSNTPFRGY  
SGFPNRTDLIPYNYP ARRY

>DgalIR1 DgIr763lc|ORF2; GAIF01020763.1 TSA: *Dermanyssus gallinae* isotig25947  
transcribed RNA sequence

MMLKESAKFLTGNERFEGYCVDLLQELSKELKFTYEIRLAADGGYGIKSDTGHWNGMIGEVEV  
EGKADLAIADLTITSAREAAVDFTMPFMNTGISILFKKPTQKATSLFGFLSPFSTGVWTVYVVGAY  
LGVSCVFLVGRMSPYEWDPHPCRQNDQVLENSFSLNLSLWFTIGSLMQQGSIDLAPKAMST  
RTVAGIWFYFTLIMISSYTANLAAFLTVEKTVYVPVESAEDLAKQTCSTR

>DgalIR2 DgIr194lc|ORF3; GAIF01026194.1 GAIF01026194.1|TSA: Dermanyssus gallinae  
isotig14279 transcribed RNA sequence  
MNPLSREIWMCIIFAYVGVSVVFLVSRFSPHEWRYEETFVGPTVSNDFSLYNSLWFLGAFMQ  
QGCDICPRSVSGRIVGGVWVFFTLIISSYTANLAAFLTVERMVTIPINPADDLAKQTEVEYGTLE  
SSSTQ

>DgalIR3 DgIr4048lc|ORF3; GAIF01024048.1 GAIF01024048.1|TSA: Dermanyssus gallinae  
isotig18401 transcribed RNA sequence  
MEAIQNSGVKISIAKKVKSEAEASDAVLELSSLGRLRPDNIKIVLNVNKPTLMRTVLSGMIKE  
VKSFKNLNTQFILASLVTDDFWQNRFRDAGSSLNVTAFLRVDSELPHVLRFHKKMMQNANY  
RDSFKNQGTETYFLDAVTALLTNYDRALQEKPTLLDAYLQADDGKESPGFNCMDQSRFYD  
NGKDLASQLKQVKLPEGQTGAVEFLADGTRLQPTIAVIHGSHVGHVKLGSWSPKKGLMLTDK  
PEALPQIKAAGAITPAKEISVGGILSPPYLMLKRGSDSDYTGLVPELLEALANIVPFAYKIHVVS  
SGQALGRADYNGSWGLMSEVINKKVEIAIADIPLTAERQKFIEYTPFLMDDLAVVVSRSQ  
AGRPSLSIFFVTIFSWQLWLSILGVFVTFVLLAYLLNRLASTKENADSFRTLWLSVGSFLCRTP  
GPEGRCRASRLLLLFWWLFLAVTVLYVSAFVAIVQTVVFGYGPVFSMRKFVQDAAGGIVD  
IGYVRDVVPGKVLKTPRSGEFATIYSQMLSTPRGRAVFSVEDGVHSVSTNFAFLGLHSQIESYL  
DDCSKRSYIVSANF

>DgalIR4 DgIr3943lc|ORF12; GAIF01033943.1 GAIF01033943.1|TSA: Dermanyssus gallinae  
isotig11463 transcribed RNA sequence  
MRLRPATAEVLAMTFTMRPGRQMGPTRGILVVVTLTIIAATLIEPTRAAVKIGGIVEAGQSRT  
KELLEILKERSSNLPTQNRMHPEIAYVEANATFGISNTACAQVGGQVSSIVSPCTGIVHTTLDL  
LSRRLSLPYINTAPDLVDVTGRNRPRESSDDTGDRGFTIVMVPSTAKATADLIRENKWKDIYFI  
YDKPEGLDELELILSHLPKEDEVQVKGVHQMTSNTSAMDYLQAIENAAWDVEKHILAIQV  
MAKRTVELSYRKKRAYYHFVIPRFTVRHFVSEVVRTFDQSTVATFQIVDEDEFRSMKAKRAGV  
STPKDPEDEHLNEAEALLMDAGQLLFEAVQSLSREQPLAAGEIFKELSQISASVSCYRFPLEVY  
AQQQIADVMKKMRFGKSTGQVRFNEYGRRTDFTLEVMELTSLVDMEEKVGVWNERDGLRFS  
NEHERQAKRARVRQDVSKNIIITIIERPFLFFKNENDTRPHIDNVDGYLKEIVRVMQDIPGRP  
AFDIHFVKDGKFGYKDAQKPSGWNGMIGEILRKDADVAIAPLTVTSERNKVVHFSQPFMATGI  
GAIARNDADDLLNIRTPFTFLRPLDWKIWLLFLGAYGVVALILLVNLVNLAVATPPVDPPTPC  
RHLYSIWIYAFGMFMSEECNCRPKSLGSRVIACSWWLFILCVLSIYTAQLWINDPF

>DgalIR5 DgIr780lc|ORF3; GAIF01028780.1 GAIF01028780.1|TSA: Dermanyssus gallinae  
isotig14118 transcribed RNA sequence  
MYKENWREAGLTGNDKYEYCIDLLDAIASSEHFNNMKYVIREVADNSYGRKDADGRWN  
GMIGELLNGKADLAVADLTITYVREEAVDFTMPFMTLGISILYKKTAK

>DgalIR6 DgIr6943lc|ORF1; GAIF01016943.1|TSA: Dermanyssus gallinae isotig24381  
transcribed RNA sequence  
MRITPPRGYKFSLFRTYWLWAVLFGAAVNVDPCPRGYTARFMSNVWAMFAVVFLAIYTANL  
AAFMITREEYYDLSGIEDSRLRYPHLMEPPFRFGTIPYGNTEQVLQRNKPTMYEYMRPYNRSN

|                                                                                                                                                                                                                                                                                                                                                                                                                                                                                                                                                                                                                                                                              |
|------------------------------------------------------------------------------------------------------------------------------------------------------------------------------------------------------------------------------------------------------------------------------------------------------------------------------------------------------------------------------------------------------------------------------------------------------------------------------------------------------------------------------------------------------------------------------------------------------------------------------------------------------------------------------|
| VNEGIAVKKGTLDAFIYDATVLDYFVGGQDDECRLTVGSWYAMTGYGFALPKKSKIFTDV                                                                                                                                                                                                                                                                                                                                                                                                                                                                                                                                                                                                                 |
| >DgalIR7 DgIr466 lc ORF4; GAIF01003466.1 GAIF01003466.1 TSA: Dermanyssus gallinae isotig14278 transcribed RNA sequence<br>MNPLSREIWMCIIFAYVGVSVVFLVSRFSPHEWRYEETFVGPVSNDFSLYNSLWFSLGAFM<br>QQGCDICPRYIFGQHSQADEAAIDNKTQREL                                                                                                                                                                                                                                                                                                                                                                                                                                                   |
| >DgalIR8 DgIr541 lc ORF2; GAIF01006541.1 GAIF01006541.1 TSA: Dermanyssus gallinae isotig08537 transcribed RNA sequence<br>MNGLGAPVLALALLGVAVADIKIGGLFEAGEDIVEMAFNSAVERINSHGLAEKGERYTPTSR<br>LLTRVEHIERADSFQASRKVCTLLEEGVAAVFGPQSTDASFVRSACETLDVPHIETHWDYRS<br>RTTNHSLNLYPHPSALGKAYLDFIKYKDWKNFAILYEENDALVRLQEILKDATLMKENRVTV<br>RQFEIGTEYRKTLKDIGKTGIKNIVLDVPIKNLYTVLKHAAQQVDMMSEYHNYFITS LDAHTIDT<br>EDFYGGTNISAFRLIDFSSKEIDEVARDWIQRHRHFSSKSSSVQSSFNTGDQDFYKNLTTKV<br>ALMYDAVRLFATALKDLHPDSGPKIQVAPLSCEREHKWSQGNAFVKYMRMINIKGLTGNIRF<br>NKDGHRTDMRLTVLDMAHSGWREASEWTMLGCISVTANYTRE                                                                                         |
| >DgalIR9 DgIr849 lc ORF1; GAIF01028849.1 GAIF01028849.1 TSA: Dermanyssus gallinae isotig14310 transcribed RNA sequence<br>MLTSYSSHFHIPLATSLSPRSFSLRSDYAISTQVSLAEATGSLRRYRWSQAAIYDDASPDILE<br>AIQNSGVKISIAKKVNNEAEASDAVLESSLGRLEKIEKIVLNVNRP SLAKAVLSGMIREVK<br>FKNLNTQFIFANPVSDDFWQYIRFRDAGSSLNVTAFRLVDSELPHVTRFHKQMMQLSSHRSLF<br>HNQGTQSYLFLDAVTALLTGFEPS                                                                                                                                                                                                                                                                                                                   |
| >DgalIR10 DgIr982 lc ORF1; GAIF01026982.1 GAIF01026982.1 TSA: Dermanyssus gallinae isotig09650 transcribed RNA sequence<br>MAVDKVNDRMGLLSATRFQAKVFRVRSRDSFSAARHVCALARHKVAAFVGPSPSVKELVK<br>ASAYRLNVP HISTDPELHERR                                                                                                                                                                                                                                                                                                                                                                                                                                                            |
| >DgalIR11 DgIr664 lc ORF5; GAIF01023664.1 TSA: Dermanyssus gallinae isotig14117 transcribed RNA sequence<br>MYKENWREAGLTGNDKYEGYCIDLLDAIASSEHFNNMKYVIREVADNSYGRKDADGRWN<br>GMIGELLNGVRTTHWTH                                                                                                                                                                                                                                                                                                                                                                                                                                                                                 |
| >DmelIR7a<br>MFHHLWLLMGLRSLAMGALHPPQPEAMTPLVAAALEILAEQVSPSQSTLAVMDLTQDAEHRD<br>ERQEQLMTIILRSV GSEMALRTFQKPPAEVPASVFLVNSAQAFNTLGFHFTDIHSTREFNFLIL<br>LTHRMSSRAERLQVLRDISRTCVRFHSTSNVILLTEKRDGVVLVYAYRLLNMDCDLSVNLELIDI<br>YKNGFLFRHGHEARSFNRLVLSGCPQVSWYPLPPFVSFIGNSSDPEERAQIWRLTGIDGELIKL<br>LASIFDFRILLEPCNKCLSPDIKDDCSGCFDQVIISNSSILIGAMSGSHQHRSHFSFTSSYHQSSL<br>VFIMHMSSQFGAVAQLAVPFTVIVWLALVSSLLLVLWVRNRLVCGRSDLASHALQVLTTL<br>MGNPLEARSLPRSSRLRILYAGWLLLVLRVYQGLFDSFRLPYHKPLPTEISELIRSNYTLIN<br>QEYLDYYPRELTVLTRNGSKDRFDYIQLGKEGKFTTSLIATMEYYNMMHWSTSR LTHIKEHI<br>FLYQMVIYLRHSLLKFAFDRKIKQLLSAGIIGYFVREFDACQYRKPFEEDYEVTPIPLDSFCGL<br>YYISLIWLSAAVVAFILELLSQRIVWLRRIFE |
| >DmelIR7b<br>MKYWLYILSCCSLVASTMESSDWDLAEALAQVVANSEMGRFKTLYIYTHNSQSTGGHLEEL<br>LDQVLMIVPNNLQARRLLLQSM EYKPYVHAVLALVDGLPSLSAIYARIRATQDLSHTLIYMS                                                                                                                                                                                                                                                                                                                                                                                                                                                                                                                                |

MPTDAYGEEMQATLRFWRLSVLNVGVVLRPPGDHILMVSYPFSAHGCQVISANVVNRYQ  
VGTKRWASQDYFPSKLGNFYGCLLTCATWEDMPYLVWRPDGSGSFVIEGALLQFMAENLNF  
TVGLYWVNKEEVLATFDESGRIFDEIFGHHADFSLGGFHFHKPSAGSEIPYSQSTYYFMSHIMLV  
TNLQSAYSAYEKLSFPFTPLLWRAIGLVLILACLLMLLVWRWRHHHELPRNPYYELLVLTMGGN  
LEDRWVPQRFP SRLVLLTWLFATLVLRSGYQSGMYQLLRQDTQRNPPQTISEVLAQHFTIQLAE  
VNEARILASLPELRPEQLVYLEGSELQSPALAQSGSSARVAILTPYEYFGYFRKVHPMSRRLH  
LVRERIYTQQLAFYVRRHSHLVGVLNKQIQHAHTHGFLHWTRQYVSAVDEKDESVAIASTS  
YSTLDGIDGDP SLSESEEDQQVAPVRQNVLSMRELAALFWLILWANLGAVVVVLELLLPRIKL  
RKILRKMKS DIKKQISKLVRK

>DmelIR7c

MLHSAVHNVSLVYALVWAIIDNYYGMATSTPLAVVQFPTSRESRRLHNDLIDAALGRSSGTGRI  
QFLEDDRVEMTETDTPPPPSGLTGRPIAIWFLDSLRSYFRLEMYLNQLGSPYKRNQFFLVIYT  
GLEDQPMESLKMIFRLLNMYVLNVNVLQRDGTVHLYTYYPYGP HHCQSSLPVYYTAFQDL  
AAPANGFGLTKPLFPRKLTNMHGCEMVVATFEHRPYVIIEDDPKTPGGRSIIHGIEGLIFRSLAER  
MNFITIKLVEQKDKNRGEILPDGNFTGILKMMVDGEVNLTFVCFMYSKARS DLMLPSTSYTSFPI  
VLVVPSSGGSISPMGRLTRPFRYIIWSCILVSLIFGVLI CLLKITALPGLRNLVLGRRNRLPFMGM  
WASLLGGLALYNPQRNFARYILVMWLLQTLILRAAYTGQLYLLLQDVEMRSPIKSLSEVLAKD  
YEFRILPALRTIFKDSMPTTNFHAVLSLEESLYRLRDEDDPGITVALLQPTVNQDFRSGPNKRHL  
TVLPDPLMTAPLTFYMRPHSYFKRRIDRLIMAMMSSGIVARYRKMYMDRIKRVSKRRNLEPKP  
LSIWRLSGIFVCCAGLYLVALIVFILEILT TNHRRRLRAFNVINRYAA

>DmelIR7d

MDIRC VVALLGLCKVQAVVWPHQHLL EEQLASQISATLQKIFINGLAVYNFGVFISTSYEEMD  
RDRVILVHQLNRNLYPPNFPVAVVLASKMNRKITAQVFTQLLFVQNAEQAI AIAEGVNRNGLC  
VIVLLTSQPERPIMTKIFTYFMQERYNINVVILVPR LHGVQAFNVRPYTPTSCSSLEPVEIDIKDG  
DLWDVFP RRLKNLHGCLSVIVWDIPPYMRINWKSSDPMDGLDGLDGLLLRIVARKMNF TLK  
LIPNEPNGLIGSSFMNGTFTGAYKMLRERRANITIGCAACTPERSTFLEATSPYSQMSYIIVLQA  
RGGYSIYEVMLFPFEKYTWLLSTILGLHWIVGSRWRMPSPILAGWMLWIFVIRASYEASVFN  
IQNSPVKPSRPTLDQALSGGFRFITDHASYRMTLKIPSFQGKTLISAGQPVDVFDALLKAPWKT  
GAFTSRAFLADHLVRHRKHRNQLVILA EKIVDNMLCMYFPHGSYFAWEINKLLFNMR SFGIFQ  
HHSQILAWDNLP TTTDTPGKRIHSSTESVATGFAESMSFVVAALNCLMGALCISIVVFGLELL  
SRRRHWTGLEWLFERV

>DmelIR7e

MNISALLNSYDLSGEQMNHINEFVARAVLHV VHHYILSVTPSLVLTLCRSNHTCNFY NKMM  
STLFREWGLAPLQIVNVLRGVPWHPVPGRRHFNVIFTDSFAAFEEIRMEYYSREYNYNEHYFIF  
LQARDRLQ GEMRLIFDYCWRYRLIHCSIQVQKSNGDILFY SYYPFGEHGCS DM EPQLINRYN  
GSMLVEPDLFPRKLRNFFGCPLRCALWDVPPFLT LDEDQEEVLRVNGGYEGRLLLALAEKMNF  
TIAVRKVHVNMRDEALEMLRRDEVDLTLGGIRQTVARGMVATSSHNYHQTR EVFGV LASSYE  
LSSFDILFY PYRLQIWMGILGVVALSALIQLIVGRMLRERMGSRFWLNLELVFVGMP LLECPRS  
HTARLYCVMLMMYTLIIRTIYQGLLYHLIRTHQLNRWPQTIESLVQKNFTVVLTPIVQEVLDEIP  
SVQHMFRRLLEANSELDPLYFLEANHQLRQHVTASALDIFIHFNRLSADKVHQRGEQSGAHF  
EIVPEDIISMQLTMYLAKHSFLIDQLNEEIMWMRSVGLLSVWSRWELSES YLRNEQSFQVLGT  
MELYAIFLMVLVGLIVGLLVFILELVSMRSIYLRKLF T

>DmelIR7f

MNTTSDSNAGSSLSSGSGYSIYKSYLENSRIDMQGEDANLYVARALRLVIENVLAQLSTTLVVT  
ISTRHLGTAHWFEYMMNILMDSWRMVAVQLLRIRPDLVVPVGRKRVSLLMVDSYQGLLDT  
NITASNANFDDPDYFIFLQARDHLIPKELQLILDHCLAHFWLHCNVMIQTAQVEVLVYTYYPY  
TADACQKAYPIPVNTFDGRKWKASQMFDPKLSQMHGCPLTVLTHWQPPFVELVWDPKHNRSR  
GSGFEIQLVEHLARRMNFSELELVNIALLRPNAYRLAEGSSEGPIEKLLQRNVNISMGYFRKTARR  
NQLLTPMSYYSANLVAVLQLERYRIGSLALLVFPFELSVWMLLLLALLIHLGIHLPSARRGNEE  
DGGGGLQVVALLLGAALARLPRSWRHRFIAAHWLWASIPLRISYQSLLFHLIRLQLYNTPSFSL  
DQLLAEGFQGICTANTQRLLLEMPQLARDPDSIQSVDTPFDDVNLVLRNRNRKIFAVANQD  
VTLSFLHSSAHPNAFHVVKQPVNVEYAGMYMPKHSFLYEKMDDDRRLDASGFIHAWRRASF  
ASVHRKEQVHMTSRRYINHAKLSGIYVMAGLYLLAGLLFAGEVLLRQRN

>DmelIR7g

MNVTSLLNFESMKYIGAQTQAASINHHVAQALRVFIEDFYQRIAPAFIVLSCRRPSPMNFYRNI  
MQLLYESVDTMIVQLVLVELGRPRRIAGPRTHNLLLVDSLDALLDIEIHTYTAQSDTSEYFIFL  
QQRDALIPHDMQGVFAYCWRHQLINCVMQSSGGQVLLHTYFPYAPGQCNDSPTRINMFL  
GESWKHRDYFPSKLHNLNGCPLIVLARKVSPFLDLDEGQRELRLGLEGRLLQELSRRMNFISQFS  
GLQDQLKNRTTWTEKQLLQKLQVQERIAHLAIGYVRKRIQYATNLTPVFPHYSNRVVGCLLLNA  
HNLTSLEIWSFPFQALTWICLLLFASWLIFGLIVRSMYSALLFFILRYHLHQRLPGNLQDLTHGD  
YAAVMGR TTLQDLREVPSLQDLLGLKSVIVTSEREEEVLRTLDRCTLREGAGSHPLFFGLISQD  
ALLHLTQRGHRAGAYHIIPQDVLEQQLAIYLQKSHSLASHLDHLVMSIRSVGLVHHWAGQMA  
SERYFRSRFLYREKRIRQPDWAVYILTAGLYLLSLVVFICELLASRRAGL

>DmelIR11a

MRFAILWLFSGCLLPGIQVGIWVVVRAQPTGRDVLLSRLGNQQNELNTRRLANASSYLTRNYI  
ANRINTLVVREICVECPYELSERQRQLVDQILASLAPELSVLLHKGTAEETTWEYTLFVVDHT  
AFTGQVFIFPDELLEREFFCIVVVSEIQSRQFVRQTVGSIVKSNLQMHFVNVVVAQLEDGTVG  
TYSYKLFKANCTPGITVRQINHFDRITGKPPQSMPLDYPVRNGHLGDCPFNVGAAMPPLIY  
KRHKDPPASNVSIPAEDLAGIDWDLQLLAKALKFRIQLYMPQEPSQIFGEGNVSGCFRQLAD  
GTVSIAIGGLSGSDKRRSLFSKSTVYHQS NFVMVRRDRYLGRLGPLILPFRGKLWGVIIVILL  
AVLSTCWLR SRLGLSHPIEDLLTVIVGNPIPDRHLPKGKFLRYLLASWMLLTLVLRCA YQARLF  
DVLRLSRHRPLPKDLSGLIKDNYTMVANGYHDFYPLELTCRQPLDFSARFERVQRAAPDERLTT  
IALISNLAYWNH KHPNISRLTFVRQPIYMYHLVIYFPRRFFLRPAIDRKIKQLLSAGVMAHIERRY  
MQYENKRKVASNDPVLLRRITKSIMNGAYRIHGLVIVLATGMFILELLAGRSNGRLRRWMEWV  
HQ

>DmelIR20a

MLASLNRSTGLSAELLDLYGLVVHFLLS GEHTTLVYFNPAGLDCSWGVLWQRNLTAHPQIVW  
QRNYSYPDLYYQFNAKLLVLA CLPMDSRAAIQLEILANSLSHLRTVVRLIEVAGPDQVTLARQ  
YLSFCLRRSMLHVELYFRDYHHS LILYSFRAFPSFELVMRWISVGQGVKLFHLKLDLDRGHRRLR  
VIPDLSPPNTFFYRDARGDNQVTGYLWDFLATFAGRLNAGLEVVRPSWRAGSASDSSYMLEYS  
AKGLIDVGLTTTTLITKWNLWAIHQYTYPLL VSSWCTMLPVEKPLATPDLFGRIVCPTLAM TLLLI  
ILVTWL VFRQLRCLTRLKNSRPARIVPHLLTLLLTCSAQLLSLLIFPPYHVRIASFEDLLRGDQ  
KILGMRNEFY NFDGAFRARYAGVFYLIDDPNELYDLRNHFNTTWAYTMPYIKWLVIKTQQRHF  
SKPLFRWSKDL CFFDFMPTSVIVAPDSIY WESIKDFTFRIHQAGLMKHWIRKSFYDMIKAGKMS  
IKDYSDLETLKPLNIGDLEIVWRVCGAAIAVASAIFIMELLYFYINVFNSL

>DmelIR25a

MILMNPKTSKILWLLGFLSLLSSFSLEIAAQTTQNINVLFINEVDNEPAAKAVEVVLTYLKKNIR  
YGLSQLDSIEANKSDAKVLLLEAICNKYATSIEKKQTPHLLDITTKSGIASSETVKSFTQALGLPTIS  
ASYGQQGLRQWRDLDEAKQKYLQVMPADIPEAIRSIVIHMNITNAAILYDDSFVMDHKYK  
SLLQNIQTRHVIAIAKDGKREEREEQIEKLRNLDINFFILGTLQSIRMVLESVKPAYFERNFAWH  
AITQNEGEISSQRDNATMFMKPMAYTQYRDRLGLLRRTTYNLNEEPQLSSAFYFDLALRSFLT  
EMLQSGAWPKDMEYLNCDDFQGGNTPQRNLDLDRDYFTKITEPTSYGTFDLVTQSTQPFNGHSF  
MKFEMDINVLQIRGGSSVNSKSGIKWISGLNSELIVKDEEQMKNLTADTVYRIFTVVQAPFIMR  
DETAPKGYKGYCIDLINEIAAIVHFDYTIQEVEDGKFGNMDENGQWNGIVKKLMDKQADIGL  
GSMVMAEREIVIDFTVPYDVLVGITIMMQRSPSSSLFKFLTVLETNVWLCILAAFFTSFLMW  
IFDRWSPYSYQNNREKYKDDEEKREFNLKECLWFCMTSLTPQGGGEAPKNLSGRLVAATWWL  
FGFIIASYTANLAAFLTVSRLDTPVESLDDLAKQYKILYAPLNGSSAMTYFERMSNIEQMFYEI  
WKDLSLNDSLTAVERSKLAVWDYPVSDKYTKMWQAMQEAKLPATLDEAVARVRNSTAATGFA  
FLGDATDIRYLQLTNCDLQVVGEEFSRKPYAIAVQQGSHLKDQFNNAITLLNKRQLEKLEK  
WWKNDEALAKCDKPEDQSDGISIQNIGGVFIVFVIGMACITLVFEYWWYRKRKNPRIIDVAE  
ANAERSNAADHPGKLVGDVILGHSGEKFEKSKAALRPRFNQYPATFKPRF

>DmelIR31a

MNLLISMFILILAAGEGEEIIPSMEESSVVTNFVKSLVKTQAIVFSCLFKDFKEISLALMRINQFVS  
VVNLNQSYSLTSILTRENARTSVMVNARCSGSELLFEASENRYFNKTYQWFLWGVLEVQS  
LFPLNLNVGPNAQITYVNETADGYAYWDIHSKGRHLKSNLEINLIATLINDTLNIARDIFHLQSID  
FRGQFNGLTLRGSVIDKEDIISNEQIESILSRPTKDAGVAAFIKYHYELLGLLRERFNFTVNRNS  
RGWAGRLGNTTFRLLGIVMRNEADIAASGAFNRINRFAEFDTIHQSWKFETAFLYRYTSDLD  
THGKSGNFLSPFSDRVWLFCLLTLGAFSIIWVLFEEIDYKILRIRVNSQKLEHLNQKSSVICIKTTC  
IERILQTFGACCQQGLDPNPVDRSVRFLVMTLFLSLVMYNYTSSVVGLLSSSDQGPSTVDE  
ITASPLKISFEDIGYYKVLFRSQNRSITRLIEKKLSSSRSLNELPIFSHIEDAVPYLKAGGF AFHCE  
VVDAYPVISEYFDANEICDLREVSGLMEVEILNWILHKNSQYTEIFKTAMCNAQEKGFVERILR  
RRQIKKPACQSLTYVPVSLSGVLPGFVILICGFGASLLLLCLEKVYAHFGPRKFCGF

>DmelIR40a

MHKFLALGLLPYLLGLLNSTRLTFIGNDESDTAIALTQIVRGLQSSLAIALPSLALSDGVCQK  
ERNVYLDDFLQRLHRSNYKS VVFSQTELFFQHIEENLQGANECISLILDEPNQLLNSLHDRHLG  
HRLSLFIFYWGARWPPSSRVIRFREPLRVVVVTRPRKKA FRIYYNQARPCSDSQLQLVNWDYD  
DNLGLQRIPLPTALS VYANFKGRTRVPVFHSPWFVWVTYCNNSFEDEEFNSLDSIEKRKVR  
VTGGRDHRLMLLSKHMNFRFKYIEAPGRTQGSMRSEDGKDSNDSFTGGIGLLQSGQADFFL  
GDVGLSWERRKAIEFSFFTLADSGAFATHAPRRLNEALAIMRPFKQDIWPHLILTIIFSGPIFYGII  
ALPYIWRRRWANS DVEHLGELYIHMTYLKEITPRLLKLPRTVLSAHQMPHQLFQKCIWFTLR  
LFLKQSCNELHNGYRAKFLTIVYWIAATYVLADVYSAQLTSQFARPAREPPINTLQRLQAAMIH  
DGYRLYVEKESSLEMLENGTELFRQLYALMRQQVINDPQGGFFIDSVEAGIKLIAEGGEDKAVL  
GGRETFFNVQQYGSNNFQLSQKLYTRYSAVAVQIGCPFLGSLNNVLMQLFESGILDKMTAAEY  
AKQYQEVEATRIYKGSVQAKNSEAYSRTESYDSTVISPLNLRMLQGAFIALGVGSLAAGVILL  
EIVFIKLDQARLWMLCSRLQWIRYDRKV

>DmelIR41a

MFIDLSWSLVLSAIVGKYLNESTICIFWNDKFEFQLLHKSDYISFVGINIKSFDDNGGHYIIDTGL  
KKKELQNKHLFLDELVIKIIISIEVTHCETVVFDDKIDRFVNAFNKASVYSIWRSLHNKVFVAHI  
ANESPESRNHFFEDQPNILFVVRDHSSASSFDIKTNKFVGRKAENPSQMILVDRYLASEQRQF



GKSLFADKLNQGREVIIAGFDYPPYTVIKHNMSTNAQDMGVSGESDFKNVYIDGTETRIVL  
NFCEQFNCTIQIDSSAANDWGKVYPNMSGDGALGMLINRKADICIGAMYSWYEDYTYLDLSM  
YLVRSGITCLVPAPLRLTSWYLPLEPFKETLWAAILLCLCAEATGLVLAYKSEQALYVLPGYREG  
WWTCTSFVCTTFKLFISQSGNSKAYSLTVRVLLFACFLNDLIITSIYGGGLASILTIPSMDEAAD  
TVTRLRFHRLQWAANSEAWVSAIRASDEALVKDILYNFHIYSDELRLAQQHMRIGFTVER  
LPFGHFAIGNYLGPAIDQLVIMKDDIYFQYTVAFVPRWLPLDKLNTLIYSWHSSGFDKYWEY  
RVVADNLNLKIQQQVQETMTGTDIGPVPLGMSNFAGFIIVWILGSAIATLTFLELSLTYILKQS  
NLK

>DmelIR47a

MRQIKLLVWLLVVGVSSTEQLQFLKNFLEAVHKERSISTILLIQRKVHKNDFLHGLYPIFWPIIC  
LDEKRVELVNNFNKDFLALVYMESEADTLLLSALAADLNHIRDARIMIWLQMSPSENFLDRIVF  
QASKQFLNLVVIENTLKTRRFYFPQPKVQVIDKPFEEKEIYPALWRNFMGKNAIAPDLVPPRS  
FNSFDPKTGHRRESGSIYNVFKAFTQRYNITMLLKWPLIRNTTQEEIIGKSVRGEIDLPIGQLISF  
RHPNGSRSQPLLGMTALSIAPCGPELPMFDRFFLYGLATPITITGYVLLNTIEIILGTLSDRIK  
RHPRRKKILNLVNLRVFSCILSLPTPQGNRLRSVKGQLTMVMSITGLILSCIVAAQTSTILTMKP  
QYRHIKNFQELSDSNITVVCNHLNYLTIKQQMDPKFMAKFMQNIWIVNSIEQMKMIFDLNTSY  
AYQTFYSYKQDPFTLLQMHTTRKAFCRTPGLDLVSGLAYTAVLEKNSIYALALQDYTLKAFSAGL  
VYYWAEESIRDLISTVGRTOFEKLPVIGYQSLKLQDYNVCWKILLIGGALAFCVFIVEVVVGLI  
NRRI

>DmelIR48b

MILQSSNLLKLLLLLAISSVRTQGLNDIIIELNQRLLISNNFLYCNQSDKLENEYEIKYLQHMPPII  
LMIFTSIESMNFTQVEYNL GADNKLFLIMGNEPPYDFLHALNLHFQFAEYIIVIDEPVDLKKST  
KWLDVFNHLWQQGYVQLLIYTSYDEKLYHKIIFPETVIEETLVEQYISIRGSFNLYGYVVRVAA  
YNNAPRSMYVNRWKGHIFAGFYMRFLRAFIDARNGSFVPLTPSNSPGNCTLNLVNETVDVC  
ADALAANPAAFSLTHGFRIASANVLVTHAKPLHSYRYLTAPFQWSVWACLVIYVLLVVNFLSFI  
GWLRSKGWEFSKYLLEVFSSLLFSGFYLKEIRGRERYILFGVLFIAGFVYSTEYLGLLKSMLISE  
VFEKQIDTFEALVESNITLMVDPYDKILFAKYNMPEILSPIMELVSFETLLKHRNRFDQDYAYILF  
SDRMALYDYAQQFLKHPKLLRIPIDFSFLYTGIPMRKRWFLKHHLGRAWYWAFESGLTRKLAL  
DADFEAVRVGYLSFLITEHVEAQPLNVDYFVMPAIALAIGYILALLSFVIEMTAWRIREFLGRK  
ATMTSTGCSEGGHVDVD

>DmelIR48c

MSLLRIILIIIFLRIVSSIPDTIISHLSAELQIKIQIYFGLGNDLYDFSRLDGNYQKIIISHNISEEFKTY  
HDEPVLIIRLERDLNLNLATLDVLSYLTDRQYNDILLIDNDEENLNSYVDIRKAYWNAGFSQ  
VLIYNSQRTWSIKPYPYLQIRPTSLKEYIENRNTRNLMGYPLRVLVTDNPPHCFVDKDELPGSP  
NRYKGSIVTMLKIFADQLNATFQANPFREFRRYSTADCVMVSDDEIDACGSIFIRTYTYATSQP  
VRLNRVVMAPFGNIEKFYFFRPFDLVWIGTGIIVVYIAVMGSLHRWHFKEWNVGQYLLL  
AVQTLNRELSLPQSSSGKFMLLLLFAIGFILSNLYVALLSMMLTKLYQRPIENLADLKAANV  
NILLQTHNIRPNSVYGSSEELRERFLLVEESQHLEKRNGLDPSYAYVDSEDRMDFYLYQQKFLR  
RRRMKKLSNPVGYTWAVQVIKQNVVLEKHYNDHVQRFFETGLQNKLVDDVHELAVKAGFL  
HFFPTQTQTIEPLRLEDIVMAAMVLGGHALAVICFLVELFA

>DmelIR51b

MCKVLTLLVVILLALTNAAYNVTLKSVLSLISTREPWINTPIFVGHNTQGGDLNDLIIWLHQT

MGVTSLTMNLFQPEHIRPLGHFKITRYNGIALFFCHDKHDIMWLTLDNRNLRKLRIRLIIILRN  
QRSGSQGAIKSIFNALWQYQFLNVLVLQRDQLYSYTPYPAMRFFKLDIHTEPLFPHAARNFHGY  
VVSTPAENDIPRVFHVHDPLTKSRKVLGYAYRTFVEYLDHYNASRLTNPDENLDPTTSVNMN  
HIVQLIIDGQLEISLHPYVFTPPTATKSYPLLIYPNCLIVPMRNEIPRHMYYLLRPFQLYSWYILLFA  
VFYITGILYCISPKNKSSWPQRLGLNFLDAISKILFISPPITIYRPTWRHLIIFLQLSVLGMSTSW  
YNIELDSFFTIVVGEQVNSMDQLVHQQRVLVKEYEINTFLRHVEPRLVEKVSRLLPVNASE  
QVSALLSFNRSFAYPFTEERWQFFAMQQQYAFKPIFRFSSACLGSPHIGYPMRVDSHLETSLNHF  
ILKIQDTGLLNHWVVSDFNDAMRAGYVRFVDNVLGYQSIDVDTLRLGWCVLGIGWILSALVF  
SCEYWHLYPWRFA

>DmelIR52a

MALGWSVILGFIGQLSAQILNYTQSRDLELLEGLSFRVLSRLNLEEEYNTLLIYGKECVFHSLL  
RKLEISAVTVPSGSTDYDWSFSTAILILSCGYDAENEENSYTLMKLQRTRRLIYLEDNSEPESVC  
MRYSLKEQHNIAMVKSDFDQSDTFYSCRLFQTPNYVEGHFFKDQPIYIENFQNMREGATIRTV  
DSLVPRTILYRDEKSGETKMMGYLGHMINTYAQKLNKLFIDTSKLGAKKPSVLDIMNWN  
EDIVDIGTALASSLQFKNMDSVWYPYLLTGYCLMVPVPAKMPYNLVYSMIVDPLVLSIIFVMLC  
LFSVLIYTQHLSWKNLTLANILLNDKSLRGLLGQSFPFPNPSKHLKLIIFVLCFASVMITTMYE  
AYLQSYFTQPPSEPYIRSRFDIGNSSLKMAISRLEVNVLTSLNNSHFREISEDHLLIFDDLSEYLV  
RDSFNSTFIFPVSVDRWNGYEEQQLFAEPAFYLATNLCFNQFMLFSPPLRRYLPHRHLEFEDHM  
MRQHEFGLVTFWKSQSFIEMVRLGLASMEDLSRKRNEEVSLLDDISWILKLYLGAMFISSFCF  
ILEILRCGERCKRLWRCRW

>DmelIR52b

MTWLVILLCFLGYMAAHIADISVQNQSLMDNELINLLLKLRNEEFYDTLLVYGKDCEFHSVIK  
NVDVAVVLVSDSMNFENFSSLLTLILSCGPDIDNGGPNSTSIKLRNRRLVLLKEDFQPSNICNI  
YTQKEQYNIALVRENFTKSKSIYTCRYFQDPNVDEVNLSGKPIFIEQFQNMKGKAIRVDPDLLP  
PRVMLYQDANDGELKMIGYVANLITNFAQKVNATLQLDFLKPSTSITEISRMADDELDMGITL  
EASLNTSNLETSSYPYLLTSYCLMVQVPAKFPYNLVYALIVDPLVLGIIFVLFLLSVLLIYSQKM  
SWQDLSVANILLNDKSLRGLLGQSFPFPLNASKLRLIFLILCFASIMLTMYEAYLQSFNTNPPS  
EPEICSFQDVGSYNRRIAMSALEVNGLIKTNNSHFREIRMDDEIFDNMPECYELRDAFNLSYN  
YVVTGDRWRSYAEQQTLFKEPVFYFARDLFCFSRLIFLSVPLRRHLPYRHLFDEHMMQQHEFGF  
VNYWMSHSFFDMVRLGLTSLKDLRPLAYTPSLLMDDISWIMKIYLAIVLCVFCFLEIGVDK  
WKRWMKFRNLQILNTC

>DmelIR52c

MVWLIILFCLGNSSQILDVTNNSHLDYRFLFGLLQRLQVEKSYDTLLVYGEDCAIPSLFERL  
QVPAVLVSSGSTNFDWNFSSLLTLILSCNFQDEREENYRTLMKLQTSRRLILLKGHIKPEVCFDY  
SKKEQHNAMVKENFYQLEVVSCLRFQDQNYEKLNLFDGKSIYKDQFRNMHGAPIRTLSK  
EPPRTIPYIDSKTGEEKFKGYVGM LISQFVKKVNATMQIREDLIKDDEEVSFVDITNFTSNLDI  
GICEARTLEMSNYDAISYPYLMSSYCFMAPLPDSLPSDVYMAIVAPSILIMFLIIFCICSVLIHYIQ  
ERSYRSLTIRSVLMNDICLRGFLAQPFPPRQYNRKLKLIIFMLVCFSSLISTTMYTAYLQAFLWG  
PPIEPRLTSFDDVKKSRYTMAINIYEREFLEALNVSLEDVEIYDYGKFSKLRSTFNTNYLFPVTAL  
QWFTINEEQKLFKYKIFYCDAFCLNQFDILSIPLRRHLPYRDIFEEHMLLQKEFGLTKYWIDQS  
YRDMIRANLTTFKDFSPLLENDYIEVHNLYWVFTMYFVGMGMGLCFFILEILRPLRYWRNCKI  
KCEYCYAFLKNFAK

>DmelIR52d

MVRIIILLCLGYTKARILDATNTNHTDLEERLLSLLRLQQEQFFNTLLIYGEDCAFSSLSRRLQ

VPTILVSSGSTSFEWNYSSLALILTCEFKAEREENYQTLKKLQMNRRLLLLNGNIKPDSVCFYS  
KKDQYNIAMVNNNFHQVGIYACRLFQERNYEKVVYLSEGNPIYVDQFRNMQGALLKSITFNLI  
PGSMAYRDPKTGQEKHIGYVANLLNFVEKV NATLDMQVKLHKAGKTSFY NITKWASEDLV  
DIGMSYAA YFEMTNFDTISYPYLMTSTCFMVPLPDMMPNSEIYMGIVDPPVLVVLIAIFCIFSVM  
LNYIKQRSWRSLSLVNVLLNDICLRGFLAQPFPPRQSNRKLKLISMLVCFSSVITTTMYTSYLQ  
SFMWGPIDPKMCSFADLENSRYKLAIRRYDIEMLRPFNVSM DHVVVFDESSQLEYLRDSFDD  
NYMYPMSALSWSAFKEQQKLFAPLFYSEKLCCLKPISFFSFPIRRHLPYRDLFEEHMLQQNEF  
GLSTY WIDRSFSDMVRLKLATMNDFSPPRELYIEVSDLSWVFGMYFTGLGISCCCFGLELLGL  
PSWTRRLRLTNWLRVRN

>DmelIR54a

MWTVITGIVLWAPVLVAGSAVDFIFRAAAEHSLSVIMIRIDYCPYNWAKDIFENQTIPVVVLSDS  
ETFINIRMFSRPLHVACLPGHELQKDLALLENFTSSLMDFPSQKKIVYISNNFSDPTRMDYIFETC  
YHRRIWNI VGLLASDEHRYFYRYHLYPSFRTEYRSLESSTIFDKDFPNMHGHPLTVMPDQWLPR  
SVLYVDRRTGKQILAGSVGRFFHVLSWKL NATLQLSKKVTTGRFLNATALKELSESFSVDVPAS  
LTIMERVEQLASTSYPMEVTHVCLMVPVARRIPIKDIYFILSSASNMFLAIVIVSSYGLALNLLRN  
MTHRDVRLVDFVLNDKALRGILQSFNLPLSRSFSTR LIFLMLGIVGLNVSSIFGAGLDTLMAH  
PPRQFQARSEAGLRRTKIPLVTTEEDFPTWMKLRV PMLVVNVSEYNHLRNGRNTSNAYFASRL  
YWNLFSEQQKRFTRELFYSTDCLWSLALLSFQWPQNSLFTEPVSQ LILEVNANGLYDFWVG  
MHYYDMTAAGLSGLEDP SLQLKEREHPTSLRIVDFQWMWQAYGTFMVIAILVFLLEVSWHRI  
TSLFVSLVY

>DmelIR56a

MGSRFFIRNLILFGLLASSNMQIPFGELEKKFELDVDFLLGVTELVGHIQGLYSITVYADCIDIHP  
SIQQRIMDKFMVPVNTIGSNLSRPNYHKLDNSRIRIVLFTGLNDTILVNLNKTDVPYSDNFYML  
AYASAIKNKCIELDFIEEVFTLLWKMSIQNAILLIRGEFMMEMWSYLYMGKIHKIKLTKPNSYLE  
SLRKYN YRFSLEVINDPPAIFWYNSSEQADVTGGGNLSVSGPLGLIINFLRHLNVTIDIVPIPGK  
QTSQYELFQQPDNLRAENGVNMVGSALLKYSPMVTQSRMCLLVSNRRMIPFSRFLDRLVSPG  
VHKLTFVSSIGIFVIKYFSHRPRSFD AIFCTIRFFFAIPLPSIILNRLPVVDRFIEVFIIIFVQILLSSNI  
SITTSALTTFWEPPIN VETMRASGLHILTEDPTILQAFKENILPSSLADLVILVDEDTYFHHVTT  
LNNSYVYV VQAHNWQIFRLYQQMTNEPFEIASEELCSKWRILGIPLNPKSPLRFMFKDYFYRI  
LESGLREQVWHSGFKKCFEFN NLKCLPVDSVDSWQPLSIEFYSNVIRAYIIGLVIATLAFVAELL  
HNGYRRKNV KKT

>DmelIR56b

MLLDTD LASGVIRSPYSFDIPHAFIFNETQFVVPKFCGPYMEIVKHFAEVYHYQLFLDSLES LPK  
KSVVEQDIISGKY NLSLHGVIIRPEETSDFFNATQHSYPLELMTNCVMVPLAPELPKWMYMWV  
PLGKYIWTCLFLGTFYVALLRYVHWREPGNATRSYTRNVLHAMALLMFSANMNMSV K LKH  
ASIRVIIFYTLLYIFGFILTNYHLSHMTAFDMKPVFLRPIDTWSDLIHSRLRIVIHDSLLEELRWLP  
VYQALLASPSRSYAYVVTQDAWLFN RQQKVLIQPYFHLSKVCFGGLFNALPMASNASFADSL  
NKFILNVWQAGLWNYWEELAFRYAEQAGYAKVFLDTYPVEPLNLEFFTAWIVLSAGIPISSLA  
FCLELFIHRRKQRRPQYERFECYDY

>DmelIR56c

MQHLLNLLAPFGRMN VFQEIVWFVSPHQRLDQLDEFIMRIDEAFGKSATQTVVNNNTEM RMI  
YSSARRNHMSFVFTTGAEDPIMKVFSKVLLGRHFYVSMVIYVDKVGDMHPIYDLLTFAYNQ Q  
FFNSMVHFESMEGVNQLFGVSKFPVMSFENRTDFLKYMGKIWKQVQNARSDVGGFGFTPLR  
QDLPHLFQSQGHYDGSTYRIIETFVRFINGSFKELIMPPDSLGGQVINMKDALQLIRERKMEFCA

HAYALFMSDEELEKSYPLLVVQWCLMVPLYNSVSTYFYPLQPFWDNVVWFALGALLALVLL  
LMWLRMFGGWSGYRGAVLNSFCYIINVPIEGQLQQPCLLRFLLLATVFFHGFLLSAYYTSNLGS  
ILTVNLFHAQINTMNDIVSAQLPVMIIDYEMEFLLNLNKELPQEFLELLRPVDSAVFSEHQTSFN  
SSFAYFVTEDEHWEFLDEQQKHLKQRLFKLSSICFGSYHLAFPLQMDSSLWRDIEYFTFRIHSSGL  
LNFYARSSFGSALHAGLVQRMPDTQEYTSAGLQHLAIAFILLLVMSFLAGIVFVLETLSR

>DmelIR56d

MDNRAAELILRERNIFPTNGSDNITLLNMFVLEMFYRITQLYHFKNFIFYISERLDLNNKDSQE  
FFHNFWTYFPMAPNLIITREHHLGIPMMQFISTPSLVMVFTTGKDDPIMELASHNQQGIHWLKT  
IFVLFPSLQSRDFETNPESLAQFTAIEIKDVYDWWVRKQFINTFLITIKDNVFIIDPYPTPSIVNKT  
GVWQAEFFHFKYAKNMKGYLVRTPIYDMPRVFKSDRPTNRYEKNFIHGTSGNFLGFLFVN  
ATLMDTSANVTADYLNMTNLLDLVSQGVYETLIHSFTEITTKFVVSYSYPIGINDCIMVPYRN  
QSPADQYMHEALQENVVVLISLFTLYITVAIYLCSPLRPRDLSAAFLQSICTLTYSVPTFIIRTPTL  
RMRYLYILLAIWGVITSNLYISRMTSYFTTAPPVRQINTVQDVVEANLRIKMLAIEYERMAKSPL  
QYPESYLNQVDLVDKHMDDLHRDPFNTSFGYTVSSDRWRFLNLQQLHLRKPFRLEICEGPFY  
HVFPLHKDSHMRSVMTEYIMIAQQAGLMNHWERETFWAVHLHRIHVHLFDDEPMALSDFD  
SSLLRTWTLGLLAGLAFAAEMKWHEHVTFKRRPVIRITRKPRSFLLRRFMKL

>DmelIR60a

MWCNNPGLIIIFLGGQILNLCQGIVNLSNETANTVIFMLPEKDLGPDVWKAGVGCCLDSFAQIFFF  
RNPKERFTRAYNMLVHAFHLSSPADQIQEGFSKLINEAVTNPGGPDREELFQMRVASDYNITN  
GTEDKGELILADNYVIVVDSVDRLKELMKKKIVEMRSWNPGARFLVLFHNATCRNRLPGVAS  
NIFKDLMEMFYVHRVALLYANSTMNYNLLVNDYYSNVNCRILNVQSVGQCHDGKLYPNNAV  
VKASMQDYVSGFSPRNCTFFACSSISAPFVEADCILGLEMRIKGMKNRLKFDVNQTCLESRG  
EMDGPANWTGLLGKVQNECDFVFGGYYPDNEVADHFVWGSDFYLDQDAHTWYIKMADRRPA  
WQALVGIFEAYTWIGFILILISWLFWFTLVMLPEPKYYQLSLTAINALAVTISIAVQERPICETT  
RLFFMALTLYGLNVVATYTSKMIATFQDPGYLHQDELTEVVAAGIPFGGHEESRDWFENDDD  
MWIFNGYNISPEFIPQSKNLEAVKWGQRCILSNRMYTMQSPLADVIAFPNNVFSSPVQMIMK  
AGFPFLFEMNSIIRLMRDVGIFQKIDADFRYNNTYLNRINKMRPQFPETAIVLTTEHLKGPFFILV  
VGSCWAALTFIGELIHRWRTQLVSTSEQQDRRSDKRRRRRRRRKPEKDNRWQRQVQVAPVVR  
FTPVKRRKVFQGGTSQK

>DmelIR60b

MRRSLYLIIAIGLVVHCVSLRYILNALENELQYRAILLVESASEIESCWEQKYIQGAVPILNFNA  
NQSLYLKDALNTNILALVCLNENVESTMQALYENLEDMRDTPILFVLSKQVQDVFLCLRR  
KMLNVLAFAKGLDRGFVYSFRAFPTFRVIERNVMDILQYFEQQLEDLGGHTLTTLDPNIIPTVV  
YKSPDGSRQLAGYLYPFLRNYVSTINATLKCWHLVPEDGMIQLGEVVRLSEIHDVDFPLGMH  
GIEHGSTSQNVPLEVSSWFLMLPMEPSLSRAQFFIMLGFEKVTPVLLLLTILLSTAHRIEMGLRPS  
WRCYVLGDRVLQGTGQAFFLPRRLSVKMLLVYSLILLNGFTFSNYSITSLETWLHPPSGHPI  
HSWEQMRTLNLKVLIVPSELDSMTKALGKQFTESNSDLFELSKSGNFQDKRLAMDQSYAYPVT  
CTLWPLLEHAQIRLPKPEFRSREMVLIPLIMAMPLPKNSMFHKS LNRYRALTHQSGLYEFWF  
KRSFNEVALRKIHYKVNQDHQIYRDFEWQDFSYVWLGFGVGGTIASILVLLAEIGYHRWQLNQ  
N

>DmelIR60d

MRLAIYVAFLLSSIGNRSGFLSSLLMSLGKELHYKTILLVGGSSCWSLEPFETGVPILNLRGENN  
AYPQDTFNSQMLALACLQTESEDAVKLLYRSLKDMRDTPTLFASSEEHHDTLFLGCFRENML  
NVLALTASSKEFIYSYQAFPTFRVIKRLKVEIHRYPQLKDLGGHIVSALPGNIMPRTMRYRNA

EGERQLAGYLNTFIRNYVESINGTLRISWGLVPEDDMRHLTISRLSKIQHVDFPLGIPLYNKTDK  
QHVVMEISSWFLMLPMETSVPRAHLFVKLGLERLLPIVVVGAVLGNHRIEVGLGPSWRCYY  
LADKVLRGALAQPIVLPRLSPKMLLIYSLLLSGFFLSNYMASLTTWLVHPPASDRILEWDQ  
LRYLHLKVLTIPEEFKYMSLILGTDFMTAYGSIFQLTNSTDFQRRRISMDPSYAYPVTTSLWPFL  
LSQVRLRRPLFRRSYDMVLQPFQVMSLPLPRNSIFHKSLRYAALTRETGLYYYYWFRRSYVELV  
ALGKISYKEEEGNPYCDLKWNDFRIVWLAFLGGTIISCLALLLEVAHYRWHLGNSSL

>DmelIR62a

MYLQFLFALFLSRYQIVATENFDRAFELALFLDRIGRVHRLHAITIVNSLGSVDPSYLDLHRLGL  
MCNSSNHFYMLPQMTATDKDSSHVHFSSLQDEETIYLVFARDSKDAVIYLQAERARGRRYTRT  
MFLLRKQESQKDIKYFFELLWKLQFRSALVVVAARNFYQMDPYPTVRVIRMRLSSYDPHHVF  
PPANRKNFRGYRMRLPVQQDVPNTFWYKNRRTKAWELAGLGGILINQLMMHLNVTMDLFRF  
EVNGSSLLNMAALTDLIVKGVKVELSPHLYDTLQSNTSDVSYPTQVAPRCFMIPLDNEISRSLY  
VFLPFSLTMWLCLLFLVLLVHFVYVRRLLIPDGHFVAILGVPAGQVRYGNRKPVRRFSTFLILF  
GIFILGQTYSTKLTSSTLVTLIRPDNSLEELFLLPYRILVLPDVAIVDSLGHAEQFSTKFSCTD  
AENFSQKRISMHPEYIYPISTIRWRFFDMQQRFLRKKRFYFSKICHGSFPYQYQLRVDSHLKDA  
LHRFLHVQQAGLHDLWLDTCYRKAHRMGYKDFSTLAELEEKLRRLRPLALNLLVPAFSLFLC  
GMLGSGIAFLVEIRHSFGCRQKPPSINRNPGD

>DmelIR64a

MHWWLLVFLPLSCQGLPEHELLELDYGLAEPQRTSLLQSSLILQFSQDYKHIPRITYFTCQKP  
HLQTPNQIPNAAEHRDAFAAKNFQLIKSLEYELFVRIVLLDVLAQSPTSGRPNRPGNGPTGGFS  
QTPSQAQSNSEWLEGVLRMEALRQIAVVDLACGAVSRRFLELASAKMLYSEKFHWLLIEDFAW  
HGRTQTAEGSGKRDDGEMEEEEPPGQQIQATDDEDLPSIESFLGGMNLYMNTLTLAKRMSEA  
AHYTLFDVWNPGLNYGGHVNLTEIGSFTPTTEGIQLHTWFRTTSTVRRRMDMQHARVRCMVV  
VTNKNMTGTLMYLTHMSGHIDTMNRFNLLMAVRDMFNWTFVLSRTTSWGYVKNRGRF  
DGMIGALIRNETDIGGAPIFYWLERHKWIDVAGRSWSSRPCFIFRHRPRSTQKDRIVFLQPFTNDV  
WILIVGCGVLTVFILWFLTTIEWKLVPHDGSALIKPKGGAPPRHHYQQQQQQEQVEAPVRPITA  
VSVVVSKEKVEEKQEEYEDSTPIDAGTLWQRCYQKLNKYIKDRKAKQKKAPERVGLFLESVL  
FFVGIICQQGLGFSTSFVSGRCIVITSLLFSFCIYQFYASIVGTLLMEKPKTIKTLSDLVHSSLKV  
GMEDILYNRDYFLHTKDPVSMELYAKKITSVPTTKENEADEDEPVDPNPVDPAKSYRDIVHS  
HETGAHAKDNAASNWLDPETGLLRHLGFHFVDVAAAYKIIAETFSEQDICDLTEVSMFPPQK  
TVSIMQKNSPMRKVISYGLRRVTETGILTYHFNVWHSRKPCCVKKIETSDDLHVDMDTVSSALLI  
LLFSYAITLMILGTEILYSKWHNRIQLKWVGAT

>DmelIR67b

MELLYLNTLQSLSLLEGNRLVQTVQELNNIYQTELVNFLEFGNGADILESAQGTFFVPTLWIKNP  
QNQKVMKGNFTSCTLTYLEDEHLDRGLYLANWLWEYHHLEVLIFFNNGGSYDKLIQIFSRCF  
NEGFVNVLVMLPGSDELYTFMPYQDLKILNLKSIKEFYSLSRKKMDLNGYNITSGLVIAGAPR  
WFSFRDRQNRILTGYMLRMIVDFTNHFNGSVRLMNVLTVNDGLELLANRTIDFFPFLIRPLKS  
FSMSNILENCGLIVPTSRLPNWVYLLRPYAFDTWIAWLIMLIYCSLALRILSKGQISISA AFL  
KVLRLVMYLSGSRDMGTRPTTRRLFLVILTTSGFILTPLYVAQLSSNSAAGLYEKQINTWEDL  
DKSDSIWPLIDVDIKTMEKLIPDRTKLLKIVPTLEADVDTYRRNLNTSCIHSFGFFDRIDFALYQ  
QKFLRFPIFRKPHLLYQQPLQISAAFGRPYLQLFNWFVRKIFESGIYLMKDDAYRHGIQSGLL  
NLAFRDRHLEVKSNDVEYYYYLIAGLWFGGLTLATVCFLLELLIGYAKIKVTISCKMNIM

>DmelIR67c

MFCWLIFLNIILLSDRSESWSAREVIHQFNHDQQQLQLNILYDCNDVELQIGQEVSNLFVNSTAD

KMKILGRFSSHSLIACFKDSTRNRTLNGVKELLWGLQYLPILFVVDNSMDFYFQQALRHGFIH  
VLALNFMNGSLYTYKPYPKVEVHQIKDMQKFYKLTCLRNLQGQAVRTTIVETMTPRCFRYRNR  
HGQLVYAGYMYRMVKEFISTYNGTEEHVFGNVDTPVYKEGLAALKNGEIDMMPRIIHALEWY  
YFYRSHILYNIKTYIMVPWAEPLPKSLYFIQPFRTVWITIMVSFVYASIVIWWIRYRQQGNSSLT  
QSFMDVLQLLFQLPLSKIWHFNMGTHQVVSFIVLVFVGFMLTNLYTAQLSSYLTTGLFKSQINT  
FDDLFRKRTLLVESFDAEVLHNMTKKIIQKFEFESIILITSIEEVFKHRKSLNTSYAYEAYEDRIA  
FELSQQRYLRVPIFKILKEVYDQRPVVALRHGLPYVELFNNYLRRIFESGIWIKLQEDSFLEGIA  
SGEISFRKSKSREIKIFDKDFYFFAYILLGMGWCVSTIALFLELWSFKYSVTNVLHEG

>DmelIR68a

MRCLWILIVAFISLAMATSIPIPIANPAPLSGYEMQLKILLQKILWVANVKRCFAVITDDLHYPIYD  
RIFFESVGRRVIPFFVMRTNESDDLQRPSRQVELFVKAIKSSDCELNVITILNGWQVQRFLGYIY  
DNRSLNMQKKFVLLHDLRLFESDMIHLWSVFIDAIFLKRQLDNKYTISTIAFPILSGVLMKNI  
ANWELGKGLNGRILFADKTSNLFGTSLPVAISEHVPMVLWANATKSFQGVVEIMNALGKALN  
FKPVYYKPNQTENMDWTELDGGASVAYGSGNPDGYAQNQTHIDSMLVDEVAHAHSARFAIGDL  
HLFQVYLKLVLSAPHNFECLTFLTPESSDNSWQTFILPFSAGMWVGVLLSLFVVGTVFYAISF  
LNAIINGNVSEFFRCLRPNRNVPMDPKIYRRISFRIASRYRSSKGDMPRDLFDGYTNCILLTY  
SMLLYVALPRMPRNWPLRVLTGWYWIYCILLVATYRASFTAILANPAARVTIDTLEDLLRSHIP  
STGATENRQFFLEANDEVARKVGEKMEVFGYSDDLTSRIAKGQCAYDNEFYLRYLVADESG  
SALHIMKECVLYMPVVLAMEKNSALKPRVDASIQHLAEGGLIAKWLKDAIEHLPAEALAAQGE  
ALMNIQKFWSSFVALLIGYVISMLTLLAERWHFKHIVMKHPMYDVYNPSLYYNFKRIYPQH

>DmelIR68b

MKFLVGLLLQWYLPGIYALAEIACRIAVEQNVQVTYLYRCASCPASFDADYSALELDLYRCVG  
SRLPVITRNMEAHELEPFRRDLSIFQIPAAEKGDSLVRRIIDMLNPHQRRKHMHKYLFVWPN  
AGRHQLRLFRGSWAKKLLYGLAITGRENGTFDFDPFAWGGGLQVIQRLDGEVPYARKVKDLR  
GYPLRFSMFTDPLMAMPRSPVETAGYQAVDGVAAARVVGEMLNASVTYVFPEDNESYGRCLPN  
GNYTGVVSDIVGGHTHFAPNSRFVLDICIWPAVEVLYPYTRRNHLVVPASAIQPEYLIFVRVFR  
TVWYLLLVTLVVVLFVWVMQRLQRRIPRRGVIQFQATWYEILEMFGKTHVGEPAGRLLSSFS  
MRTFLMGWILFSYVLSTIYFAKLESGFVRPSYEEQVDRVDDLHLDVHIYAVTTMYDAVRSALT  
EHQYGLLENRSRQLPLGIATSYYQPVRRRDRRAAFIMRDFHARDFLAITYDSQAERPAYHIAR  
EYLRSMICTIYLPRGSPFLHRLESLSYSGFLEHGFFEHWQRQMDLITRVGASPDAAEFLEDLGDQT  
DTDSGSNELAIRNKKVVLTLDILQGAFFLWSVIGIGISCLGFAVEHAHWFWRRQTLRVAEART  
S

>DmelIR75a

MQLVQLANFVLDNLVQSRIGFIVLFHCWQSDESLKFAQQFMKPIHPILVYHQFVQMRGVLNWS  
HLELSYMGHTQPTLAIYVDIKCDQTQDLLEEASREQIYNQHYHWLLVGNQSKLEFYDLFGLFN  
ISIDADVSYVKEIQDNNDSVAYAVHDVYNNNGKIIGGQLNVTGSHEMSCDPFVCRTRHLSLQ  
KRSKYGNREQLTDVLRVATVVTQRPLTSDDELIRFLSQENDTHIDSLARFGFHLTLILRDLLH  
CKMKFIFSDSWSKSDVVGGSVAVVDQTADLTATPSLATEGRLKYLSAIETGFFRSVCIFRTPH  
NAGLRGDVFLQPFSPVWYLFGGVLSLIGVLLWITFYMECKRMQKRWRDLPLSLLSTFLISFG  
AACIQSSSLIPRSAGRLIYFALFLISFIMYNYTTSVVSSLLSSPVKSKIKTMRQLAESSLTVGLE  
PLPFTKSYLNYSRLPEIHLFIKRKIESQTQNPWLPAEQGVLRVDRNPGYVYVFETSSGYAYVE  
RYFTAQEI CDLNEVLRPEQLFYTHLHRNSTYKELFRLRFLRILETG VYRKQRSYVWHMKLHC  
VAQN FVITVGM EYVAPLLLMLICADILVVVILLVELAWKRFFTRHLTFHP

>DmelIR75b

MLQLHNLILHNLHMAKLSHVLIHCSLSHLALLAQS KNIFTQFQPLHSDIQLNDDFLNHNILKL  
GVFLDINCDKSGTVLDMASAKRFFSHRYHWLIYDRSMNFSVLESHFKEAQIFVDADVTVYVTH  
DPFSKNFLLYDVYNKGRQLGGELNITADREIFCNKTNCRVERYLSELYTRSALQHRKSFTGLTM  
RATAVV TALPLNVSIKEIFDFMNSKYRIQLD TYARLGYQARQPLRDMLDCKFKYIFRDRWSDG  
NATGGMIGDLILDKADLAIAPFIYSFDRALFLQPITKFSVFREICMFRNPRSVSAGLSATEFLQPF  
SGGVWLTFALLLLL LAGCLLWVTFILERRKQWKPSLLTSCLLSFGAGCIQGAWLTPRSMGGRMA  
FFALMVT SYLMYNYYSIVVSKLLGQPIKSNIRTLQQLADSNLDVGIEPTVYTRIYVETSEEPDV  
RDLYRKKVLGSKRSPDKIWIPTEAGVLSVRDQEGFVYITGVATGYEFVRKHFLAHQICELNEIPL  
RDASHTHTVLAKRSPYAELIKLSELRMLETG VHFKHERSWMETKLHCYQHNHTVAVGLEYYAA  
PLFIILLGAILLCMGILGLEVIWHRHCTLH

>DmelIR75c

MTSWPLYRLIVFNLEINLSNLMVFHCWSIKEAFPLVEMLNQNGIFSQYIDVQNPDLANVHK  
EYLDSDLVRLGVFLDLGCDKAELVTNQQSSRARLYNQNLHWLWLYDEAGNFTKLTQLFEGANLS  
LNADVTVYSREDEERFILHDVYNKGSHLGGKLNITVDQTLQCNRSHCQVKEYLSELHLRPRLQ  
HRMDLSSVTFRLAALVSVLPINSSEEELEFLNSDRDSHMDSISRIGNRLIMHTQEILGFKLHYI  
WCGTWSVQDAFGGAIGMLTNESAELCTTPFVPSWNRLHYLHPMTEQAQFRAVCMFRTPHNA  
GIKAAVFLEPFMPVWFVAFAGLLIFAGVLLWMIFHLERHWMQRCLDFIPSLSSCLISFGAACIQ  
GSYLMPKSAGGRLAFIAVMLTSFLMYNYYSIVVSTLLGSPVRSNIRTIQQLADSSLDVGFDTVP  
FTKTYLVSSPRPDIRSLYKQKVESKRDPNVWLSPEEGVIRVRDQPGFVYTSEASFMYHFVEKH  
YLPREISDLNEIILRPESAVYGMVHLNSTYRQLLTLQVVRMLETGITSKQSRFFSKTKLHTFSNSF  
VIQVGMEYAAPLFISSLVAYFLALLLILEICWARYAKKKFSTIIPQNQ

>DmelIR75d

MKVQVAHWLPLIFFLLVSGTPRVAGSWRSEYSRQDPDPKTRWGNQLPDMLVAYYRHHGVHSL  
MLVVCHTDIADFRLWKLWQHFNLN NFYVQVSTESSLRDLQHVDALDEHKDAPPPKSFHANN S  
THWETSFLLPALPYKMGILLLEFSSECALNLLRWSAASEHNYFTTNRFWLLLTEDPGDIDLLED  
PEIFIPDSELRVLHYENVGNFSCSLIDLYKVAAWKPLKRTL VGHNIRNSRHVIHALQHFGSAITY  
RQDLEGIVFNSAIVIAFPDLFTNIEDLSLRHIDTISKVNHRLMLELANRLNMSYNTYQTVNYGW  
RQPNGSFDGLMGRFQRYELDLAQLAIFMRLDRIALVDFVAETYRVRAGIMFRQPPLSAVANIFA  
MPFENDVWVSILMLLIITTVVLVLELFFSPHNHMSYMDTLNFVWGAMCQQGFYVEVRN RSA  
RIIVFTTFVAALFLFTSFSANIVALLQSPSDAIQSLSDLGQSPLEIGVQDTQYNKIYFTESTDPVTK  
NLYHKKIASKGENIYMRPLLGMKEMRTGLFAYQVELQAGYQIVSDTFSEPEKCGLMELEPFQL  
PMLAIPTRKNFPYKELIRRQLRWQREVSLVNREERKWIPQKPKCEGGVGGFV SIGITECRYALGI  
FGCGAAVSFVLFLEFIFRHFQVYRIIKGYREVQR

>DmelIR76a

MENLLVESYFFSTVLSFFAQFFADSHATCIFWHPAFDFRLETVHPMPLIIMDWHRWANRSDQD  
VYDYKIKEDEFEGKGIPYNDWTLRLTVAIERSHCETFIAFQEIQIPEFARYFYHASIYSIWRSLRNR  
FMFVYTKEFEDKKDSYLSGYIFQDQPNILVITSQYLNSTFEIKTNRVFGPRNFKNPEPVEFYIL  
QRFDAKGTKATWETQSAMSSKMRNLKGREVVIGIFDYKPFMLLDYKPPLYYDRFMNTT DVT  
IDGTDIQLMLIFCELYNCTIQVDTSEPYDWGDIYLNASGYGLVGMILDRRNDYGVGGMYLWYE  
AYEYMDMTHFLGRSGVTCLVPAPNRLISWTLLLRPFQFVLWMCVMLCLLLESLALGITRRWEH  
SSVAAGNSWISSLRFGCISTLKL FVNQSTNYVTSSYALRTVLVASYMIDIILTTVYSGGLAAILTLP  
TLEEAADSRQRLFDHKL IWTGTSQAWITTIDERSADPVLLGLMEHYRVYDANLISAFSHTEQM  
GFVVERLQFGHLGNTELIENDALKRLKLMVDDIYFAFTVAFVPRLWPHLNAYNDFILAWHSSG

FDKFWEWKIAAEYMNHRQNRIVASEKTNLDIGPVKLGIDNFIGLILLWCFGMICSLTFLGEL  
WRGQG

>DmelIR84a

MIKLQVKVISWPLIILTAFLRVLQIESINTNFLELAAFEDFLRSEHLSHVLVVRGDDADGDWKIE  
CHQKLLANYRVQFYRPEMSANFEDLMFYGSPRTAVLVLNSEHVLVRRQVFGVASEAGYFNNSL  
AWFILGSGRESLPVEQLIDQLLSGYRMGIDADITVALRGPDNASMLFYDVYRISRQANTPLIIEK  
KGLWTHSGGYQKFGNFKNWVIRRRNFLNVTLIGSTVLTEKPPGFGDMEYLADDKQLQLDLP  
MQRKTYQLFQLVERMFNLSLAISLTDKWGELLNNGSWSGVMGQVTSREADFAVCPPIRFVLDR  
QPYVQYSAVLHTQNIHFLFRHPRRSHIKNIFFEPLSNQVWVCVLALVTGSTILLFLHVRLEML  
SNMENRFSFVWFTMLETYLQQGPANEIFRFLSTRLLISLSCIFSFMLMQFYGAFIVGSLLSESAR  
SIVNLQALYDSNLAIGMENISYNFPIFTNTSNQLVRDVYVKKICKSGEHNIMSLQQGAERIIQGR  
FAFHATAIDRMRYRLLELQMDAEFCDLQEVMFNLPYDSGSPVPGKSPWREHLAALLHFRATG  
LLQYNDKKWMVRRPDCSLFKTSQAEVDLEHFAPALFALALAMVASALVFLLELFLHWLPDFR  
RRLGTMST

>DmelIR85a

MSIQWLKHILLAILVNLAGTRENHIPLDLKKSSIVMVKMSQILCKARIKVLVYFENQTSHEH  
TGQILKEVTKDISNQNTPLEAVKDDGILMYMVMITTNISQPLELSLIRKKSAAKHRSHVFLV  
RDADTVSDAWMRASFRQFWKIWLLNIVILYWRDGRNLNAYRYNPFMDNYLIPVDNKPNEVPTL  
EQLFPKTIPNMQRKPLRMCIYKDDVRAIFWRQGTILGTDGLLAAYVAERLNATMMITRPHSYN  
NHNLSDDICFLEVAKEYVDVAMNIRFLVPDTRKQAESTVSHTRDDL CVIVPKAKTAPTFWNIF  
RSFGLVWALILVSVLVANVFCYILKSEVGRVPMQLFAGALTMPMTQIPPNSIRLFLIFWLYFG  
LLICSAFKGNLTSMMVFQPYLPDINQLGALARSHYHIIIRPRHVKHIQHFLTLGHKHESRIREQM  
LEVSDTQMYEMMRNNDIRFAYLEKYHIARFQVNSRVHMHMLGRPLFHLMNLSCLVPFHAVYIVP  
YGSPYLGLDSLIRSSHEFGFERYWDRIMNSAFIKSGVKVNVNRRRGGSGNDEPVVLKLQHFHAVF  
ALWLVGIGMACIVLAWEHLTHNYNLAVTKRRD

>DmelIR92a

MLLQPLVMHLSQLLRIVGQYFAEFPSILIVYNNASSTTPLQLEYLSALELVLRELSKPIRLQWIN  
VAFLKDLNDLEDQVMGALNSSVTEGFITILSQTHHFIHARYYATRANANVRLKDKRYLFLCEDES  
PAELLCMDILQFYPHHLMVRPGTETAPTGTGPHDPDRRGGGASVSTKNKDDGEGGAGNKTTT  
PYRDINFELWTQKFGVAVGNLDALLDAFLPNETFANRVELYPNKLNLQRRSLLVGSITYVPY  
TITNYVPAGQGDVDPIHPQWPNRSLTFDGAEANVMKTFCQVHNCHLRVEAYGADNWGGIYD  
NESSDGMGLDIYEQRVEMAIGCIYNWYDGITETSHTIARSSVTILGPAPAPLPSWRTNIMPFNNR  
AWLVLISTLVICGTFLYFMKYVSYRLRYSQTQVKFHHSRKLEKSMLDIFALFIQQPSAPLSFDRF  
APRFFLATILCATITLNIYSGQLKSMLTFPFYSAPVDTIEKWAQSGWKWSAPSIIWVHTVQSSD  
LETEQILARNFEVHDYSYLSNVSFMPNYGFGIERLSSGSLVGDYVSTEALENRIVLHDDLYFD  
YTRAVSIRGWILMPELNKHIRTQETGLYFHWELEFIDKYMDKKKQEVLMDLANGHKVKGAP  
QALDVRNIAGALFVLAFGVAFAGCALVAELLIHRMDLSK

>DmelIR93a

MNPGEMRPSACLLLLAGLQLSILVPTEANDFSSFLSANASLAVVVDHEYMTVHGENILAHFEKI  
LSDVIRENLRNGGINVKYFSWNAVRLKKDFLAAITVTDCENTWNFYKNTQETSILLIAITDSDC  
PRLPLNRALMVPVIVENGDEFQQLILDAKVQQLNWKTAVVFDQTTILEENALLVKSIVHESITNH  
ITPISLILYEINDSLRGQQRVALRQALSQFAPKKHEEMRQQFLVISAFHEDIIEIAETLNMFHVG  
NQWMIFVLDMVARDFDAGTVTINLDEGANIAFALNETDPNCQDSLNTISEISLALVNAISKITV  
EESIYGEISDEEWEAIRFTKQEKQAEILEYMKFLKTKNAKCSSCARWRVETAITWGKSQENRK



FRSTPQRDAKNRNFEFINIGYWTPVLGFVCQELAFPHIEHHFRNITMDILTVHNPPWQILTKN  
SN GVIVEHKGIVMEIVKELSRALNFSYYLHEASAWKEEDSLSTSAGGNESDELVGSMTFRIPYRVV  
EMVQGNQFFIAAVAATVEDPDQKPFNYTQPISVQKYSFITRKPDEVSRILYFTAPFTVETWFC  
LGM GILLTAPTLYAINRLAPLKEMRIVGLSTVKSCFWYIFGALLQQGGMYLPTADSGRLVVGFWWI  
VVIVLVTTYCGNLVAFLTFPKFQPGVDYLNQLEDHKDQYGLRNGTFFERYVQSTTREDFKH  
YLERAKIYGSAQEEDIEAVKRGERINIDWRINLQLIVQRHFEREKECHFALGRESFVDEQIAMIV  
PAQSAYLHLVNRHIKSMFRMGFIERWHQMNLP SAGKCNKSAQRQVTNHKVNMDDMQGCFL  
VLLLGFTLALLIVCGEFWYRRFRASRKRQFTN

>DmelIR94a

MALPKQLKFINIFLVLLIYGSSDGTENQHEIFLNRLQAVHNERSVETLFLHHSNLANCSLQD  
WNPPRIPTIRSNELTVFNVEKTFNHNALALVCLMKNSYREILNTLAKSFDCMRQERILMIHRKS  
DSKFIEDITHEVKNLQFLHLIVLIVQEKYNGQVFASTLRLQSFPEPHFKRIRNVFAIQRIFYRPI  
NF HGKVLNAIPNDIPILFVALNEMFTEYARRYNSTLRIQNRTIKEDIEITEDNYDIDMKIQLHNSQ  
NF LHHMNIAMDIGSNLILVPCATELRGLDIFKELGVRTLTWLALLFYIIFVLVEMLFVVISNR  
FNG RNFTMRYTNPLINLRAVRAILGQTSPISNRYLSIQHFFVFMSLFGTLFGGFFDCKLRSFL  
TKR  
PY YSQUIENFSELRKSQVTVVVDHTTRQFIEQEIANNFRDEVNVRTTTIQELINHVYSYDRKFA  
FV ANSIPWRTFREEMKSNQKILCDSKNLTILENVPLTFSIRRNAIFSHHLRNFIINAADSGMITC  
WF KMAGKVIRKHIKTTLRESEQP SHLPLSFDHFKWLWAVLCIAYVMSFMVFMVMEILWSKYQR  
RT RSVSIV

>DmelIR94b

MSLIFNLLFILILSQAVSQETEFQLKYLNNIVRSMIKLHKMETLVIVKHHLDNNCSLQNWNAH  
GMGIIRTNDQGKLIMKDTFNSRTLAIICIGQNSHITLLRNVFETFGKVQQKKIILWTQME  
LKEKF FQEISKSRDLKLLNLLVLKAVTKDKLLIYRLNPFPSPHFKRIENIWPNDTLFMDTK  
FNFHGMT AVVKHDYNWTIQMGNIRKFPISRIEDKEVIEFALKYNLTLQFFNDVERFDIELR  
KRIILKSNSTQP IDSGIPMVFSLLIVPCGNYSIQDVIVKVSIEKWIFVIILVYVIFVLIET  
FLGV TILISRQSRHQM IPNTLVNLC AFRAILGLPFPETRRTSLRQLFLAIALFGMIFSIFIN  
CKLSSMLTNP  
CPRPQVNNF EELKTSGLTVVMDHDAENFIEKEIGVDFNQYMPRKVTLTFTERAKLLFSLKGN  
HAFTLFS  
ESF AIIESYQRSKGLRAHCTSEDLIVAERVPRYILENNSILDRPLRRFIRQM QESGITNHWL  
KNIPSSL EKNLMQITIPYDRERVHPLSIEHLTWLWCILILGYSISMIVFFVEMSLKRRKKN  
LENRAPNICIC

>DmelIR94c

MSKVFKLLVPLIYLSLTKGSKNPQLKFLRELINVIEEGREIRTIMVIKHSRDEYCHLDQWNPRG  
SPILRTNEMGSIRISGYFNDQAVILACMGENDYGLLKSLANAMDNMRQERILW SEREPTKML  
MDYISQQADRYNFAQIIIIVTMNEDVDVAVPSLHQLNPYPTPRFRQITNISNIRRTSFFGC  
GLSFQGK TAILKESVVS NIRFKVWSPSGPIPLSELKDYEIVQFAVKYNLSLKLQYDQNESKSD  
HFDIQLG  
PLFI TKDFPTQMAFVSPNTACSLIVIVPCSPKWRFMVHLHKLGV LKLGCLLIAYAVFVLIET  
LILWLT HRISGREVRLTSLNQLLNPRAFR  
GILGLPFPEFRSSISLRQLFLVISVFG  
LVYSN FVSCTLSALLT KPAQNPQVRNFKELRDSGLITIMDKYTHS  
FIEKHIDPEFFDHVLP  
HYLILQKKEALRMIW  
NFND SYSYVMYTTT  
WKSLNTVQKSFDERV  
FCESES  
LTIAWNLP  
RMYVLGNNSV  
LKWMLSR  
YITYMP QTGIPDSWTEQLPKVLKLLYNVTSP  
RRIKEGAVPL  
SIQHLSWI  
WHLLFIGESI  
ATLVFIVEILLQKS  
NQHTSNMRERSSEDDDFV

>DmelIR94d

MGQLHLLLVALVLLSPGGDSFYHSLIHHLNRELKIEYVLLGNFDTTWLDILWQLPVSVLQIKE  
HSRETYSLLENPSHNVLTIAFVNDSPE  
DILEILYRNL  
RMLNTQP  
VLLVIRKSTIRVNSLLEWCWH  
HQLLKVVAIAQDFMESLIVSYNPPFV  
LQFIERRLDNSTVIFEKRENLHG  
YEVPIALGGSSPRLI

VYRDLEGKLI FSGPVG NFMKSFEQR YNCRLVQ PYPFDESAISPARDLIASVQNGSVQIALGAIYP  
QVPYTGYSYPIELMSWCLMMPVPEEVPHSQLYSMVFS PMAFGITIVAMVLISLTLSMALRLHG  
YRVSFSEYFLHDSCLRGVLSQSFYEVL RAPALIKAMYLVICLLG LLITSWYNSYFSTFVTSAPRF  
PQLTSY ESIRHSNIKIVIWKPEYEMLLFFSENMEKYSSIFQLQEDYKEFLHLRDSFDTRYGYMMP  
MEKWSLMKEQQRVFS SPLFSLQDDLCV FHTVPIV FPMVKNSIFKEPFDR LILDVTATGLLSRWR  
DMSFTEMIKAGQLGLEDRGHPKEFRAMKVGDLIQIWR FVGWMLGLATIVF LLELICFWRHKM  
WQNMKYMF CRNKNI

>DmelIR94e

MDCPKWILSGLCLISLVSGATVIELLGT LKLELDFEYVLLMKNRNFSLSDQVWNGTSLTKDVM  
DEVQVPVLQFNENVS YFLHNSISRRLVTLGFMS DANLDEHRGLLTALVANLRHMTTSRVIFLVQ  
SKASTDFLYELFRNCWRK KLLNVIVIFQDFETTSTFYSYSNFPILQIEERIYETSLQTLPIFPDRLR  
NLHGYEMPVILGGTAPRMIAYRNKKGNVVYDGT VGHFMTAFQQKYNVKFVQPLQAKNPLDF  
APSMQTVGAVRNETVEISISLTFPTIPFGFSYPYEQMNWCVMPLVEADVPPFEYYTRVFELAAF  
LLTLGTLVLISCLLASALS LHGYATNISEFLLHDSCLRGV LGQSFVEVFRAPTLVRGIYLEICVLGI  
LITAWYNSYFSSYVTSAPKQPPFR TYDDILASKLKVVAWKPEYAELVGR LLEFRKYETMFLVEP  
DFNRYLALRDTLDTRYGYMITTNRWVLINEQQKVF SRPLFQKRDDFCFFNNIPFGFPLHENS VF  
MEPVQKLIMELAETGLYYHWITTFSELIDAGEMHFV DLSPHREFRAMQIQDLQYVWYGYAF  
MVVLSLVWLENLAYTVKSKTIFPTHFMQRNKK

>DmelIR94f

MWQQVLLAETS NWFRSDVLRQFWTHLRVEIRFRTMLN YRLESCDCWFDNVLGSDNSTALLW  
NDQTYPHYLR RRQD TDILVV SCLRFHQYQEVLLALSMLDQMR SMPVVLQ LCGDEDSMQEL  
NSARLLLKHSQDLKMPNVVLLSSTFFTSATLYS YEMFPEFNVQKLVYQAYLTLFPYKLG NLKG  
HPIRTVPDNSEPLTIVRKT LNGSIAIDGLVWQF MIEFAKHINATLQLPIEPHPEKSIKLVQILD LVR  
NQTVDIAASLRPYSLNVQRSS THY GSPMMVGNWCMMLP TERTVIGSHEALTRLMKSPWTWLI  
LLL FYSVHRFLAQKTRLRSSLIHLIKLLINLSLICFLQA QLSAYFIGPQKVN HISNMQQVEESGLK  
IRGMRGEFMEYPIDMRSRYASSFLLHDLFFDLA QYRNSLNTSYGYTVTSVKWELYKEAQRHFR  
RPLFRYSEEICVQKLSLFSLIQQSNCIYCYRSRIFILRMHEAGLIRLWYRRSYYVMVTAGRFPIGD  
LSTVHRAQPIRWTEWQNVVLLHGVGLLFSVVFVIELTVHYANVCLNNL

>DmelIR94g

MSTAVNSVH SKLVSLISRGQELTSIFFYAPAKEKCH LEDTISSATWGLPLVIWRTDRTVILNGFIGE  
GLLVLA CLPGFHW RALLGSLARSLKYLRQARILIELMQDRDEF L VSEVLQFCLSQDMINVNAIF  
DDFPETENLSSFEAYPSFEVVNQTFPTDQVSDLYPNKMLNLRGGVIRTMPDYSEPNTILYQDK  
EGNKEILGYLWDLLEAYAHKHNAQLQV VNKYADDRPLNFIELLDAAQSGIIDVGASIQPMSMG  
SLSRMHESY PVNQASWCTMLPVERQLHVSELLTRVIPYPTLALLLLWIFYEVL RGRWRRHS  
RLQSIGWLVLATLVSSNYVGKLLNLFTDPPSLPPVNSLAALMESPVRIISIRSEYSAIEFTQRTKY  
SAAFHLALHASILIGLRN AFNTSYGYTITSEKWKIYEEQQKRSSKPVFRYSKDLCFYEMIPFGLV  
IPENSPHRAPLHSY TLLLRQAGLHDFWVNRGFSY MVKAGKINFTAVGERYEAKTLTITDLRNVF  
IIVVSVLLISLILFTCELFVSWVNYWLG F

>DmelIR94h

MLSNISFSSAPELVDLYGLVLKFLV SSETTLFYFNPTGQKCSWETLPR TILSNHPQIIFREETY P  
GLYKRHSSNL FVMACLSSTS YDGQLQLLAESLTRYRSVRVLIEVQDKEGSFLASQILLLCQQHS  
MLNVVLYFSRWTRTLNVFSYLA FPYFKLLKQRLSGSLRPKIFINQLKDLQGYKIRVQPDLSPPNS  
FSYRDRHGECQVGGFLWRIVENFSKSLKGDTQVLYPTWAKAKVSAAEYMIQFTRNGSSDIGVT

TTMITFKHEERYRDYSYPMYDISWCTMLPVEKPLSVEILFSHVLSPGSALLLILAFILFFLIVPQLI  
KCLGITFRGRLIGMASRIFALVMLCSSSAQLLSLLMSPPLHTRIKSFDDLTSGLKIFGIRSELYFL  
DGGFRAKYASAFHLTENPNELYDNRNYFNNTSWAYTITSVKWNVIEAQQRHFAHPVFRYSTDLC  
FSSETPWGLLIAPESFYREPLQHFTLTKINQAGLITQWMTQSFHEMVRAGRMTIKDYSRTNLMK  
PLRIQDLRKCWWIFAVGLGTSTVVFTIELLLIYTNVFLNSL

>DmelIR100a

MATTLQLIMLALVGGTGLQANNTDHKQVLTIVKQLEGGLELHLRTSEDGGNDLVQFLMQEK  
SSIIISAKQEEVPSRAKIMRHHFFIFDGVHQMQEIRTSLFNTDGFYILALENNTIEDDVLMEFAA  
DVWLQHGHSRIYYVQLSKKSULLFNPLQRLVVVQDSKTYSRITYKDLEGYHLRIYIFDSVYSSV  
IGDGENKVLVSVTGADAKLAKTVARQLNFTADFVWPDEFFGGRLANGEYSSGGVGRAHRGEV  
DIIFAGFFIKDYLTTHIQFSAAVYMDELCLYVKAQRIPQSILPLFAVHMDVWLCFLLVGLLGAL  
VWLILRAVNLILGIEGVPDGSRATRISYFGAARRIFVDTWVIWVRVNVGRFPPFHSEIFVASLCL  
VSVIFGALLESSLATVYIRPLYRDNVTLREDESQPIYIKHPAFKDDLFGHNSSEVYRRLDAK  
MMLVAEGEERLIEMVSKRGGFAGVTRSASLQSDIRYVMTKKVHKIPECCKNYHAIYVLRPSP  
YLEEVNRIVLRLVAGGIVGLWTGEAKERAKWSIQRFPEYLAELDVGRWKVLTLSDVQLAFYAL  
TIGCLLSAIVCMAEILLGRQRLHSPK

>DmelCG11155

MVRKKREIVIKENIQGRSYLKKICCSYIILSILVISNALPPVIRVGAIFTEDERESSIESAFKYAIYRI  
NKEKTLNPNTQLVYDIEYVPRDDSFRTTKKVCSQLVQVQAIQFGPTDALLASHVQSICEAYDIP  
HIEGRIDLEYSNKEFSINLYPSHTLLTLAYRDIMVYLNWTKVAIIEEDYGLFNLMSSTETKAE  
MYIRQASPDYSRQVLRRAIRQKEIYKIIIVDTNPISHKSFRRSILQLQMNDHRYHYMFTTFDLETYD  
LEDFRYNSVNITAFRLVDVDSKRYLEVINQMQLQHNGLDITINGSPYIQTESALMFDSVYAFAN  
GLHFLNLNDNHQNFYIKNLSCTSDQTWNDGISLYNQINAAITDGLTGTVQFVEGRRNIFKLDILK  
LKQEKIQKVGYPWHPPDDGVNISDPTAFYDSNIANITLVVMTREERPVMVKEDKNLTGNLRFEG  
FCIDLLKAIATQVGFQYKIELVPDNMYGVYIPETNSWNGIVQELMERRADLAVASMTINYARES  
VIDFTKPFMNLGIGILFKVPTSQPTRLFSFMNPLAIEIWLYVLAAYILVSFALFVMARFSPYEWK  
NPHPCYKETDIVENQFSISNSFWFITGTFLRQSGLNPKATSTRIVGGCWWFFCLIISSYTANLAA  
FLTVERMISPIESASDLAEQTEISYGTLEGGSTMTFFRDSKIGIYQKMWRYMENRKTAVFVKTY  
EDGIKRVMEGSYAFLMESTMLDYAVQRDCNLTQIGLLDSKGYGIATPKGSPWRDKISLAILEL  
QEKGIQILYDKWWKNTGDVCNRDDKSKESKANALGVENIGGVFVLLCGLALAVVVAIFEFEC  
WNSRKNLNTENQSLCSEMAEELRFAMHCHGSKSRHRPRKRSLNCSSVPTYVPSNVSTSNVG  
VYYNYFN

>DmelCG3822

MRSSGVLVPLLLLLQLILNCRKAQSLPDIKIGGLFHPADDHQELAFRQAVDRINADRSILPRSKL  
VAQIERISPFDSFHAGKRVCGLLNIGVAAIFGPQSSHTASHVQSICDNMEIPHLENRWYRLRRE  
SCLVNLYPHNPLSKAYVDIVRHGWKFTTIIYENNDGIVRLQELLKAHGMPFPITVRQLSDS  
GDYRPLLKQIKNSAEAHIVLDCSTERIHEVLKQAQQIGMMSDYHSYLVTSLDLHTVNLDEFY  
GGTNITGFRLINEKIVSDVVRQWSIDEKGLLRSANLTVRSETALMYDAVHLFAKALHDLDTSQ  
QIDIHPISC DGQSTWQHGFSLINYMKIVEMKGLTNVIKFDHQGFRTDFMLDVELTPAGIRKIGT  
WNSTLPDGINFTRTFSQKQQEIEANLKNKTLVVTTILSNPYCMRKESAIPLSGNDQFEGYAVDLI  
HEISKSLGFNYKIQLVPDGSYGSLNKLTEWNGMIRELLEQRADLAIADLTITFEREQAVDFTTP  
FMNLGVSILYRKPIKQPPNLSFSLSPSLDVWIYMATAYLGVSVLLFILAKFTPYEWPAYTDAHG  
EKVESQFTLLNCMWFAGSLMQGCDFLPKALSTRMVAGIWWFFTLIMISSYTANLAAFLTVE  
RMDSPIESAEDLAKQTRIKYGALKGGSTA AFFRDSKISTYQRMWSFMESARPSVFTASNGEGV

ERVAKGKGSYAFLMESTSIEYVTERNCELTQVGGMLDTKSYGIATPPNSPYRTAINSVILKLQEE  
GKLHLKTKWWKEKRGGGKCRVETSKSSSAANELGLANVGGVFVVLMMGGMGVACVIAVCEF  
VWKSARKVAVEERLSAILNE

>DmelCG5621

MWVVKMISTEASFPLGFILTSLLLAFFGCRGERTNVGLVYENTDPDLEKIFHLAISKANEENEDL  
QLHGVSVSIEPGNSFETSCKLCKMLRQNLVAVFGPTSNLAARHAMSICDAKELPFLDTRWDFG  
AQLPTINLHPHPATLGVALRDMVVALGWESFTIYESGEYLPTVRELLQMYGTAGPTVTVRRYE  
LDLNGNYRNVLRIRNADDFSFVVVGSMTLPEFFKQAQQVGLVTSYRYIIGNLDWHTMDL  
EPYQHAGTNTGLRLVSPDSEQVQEVAKALYESEEPFQNVSCPLTNSMALVYDGVQLLAETK  
HVNFRPVALSNDSDAWDKGYTLVNYMKSLLTNGLTGPIRFDYEGLRDTDFKLEVIELAVSGMQ  
KIGQWSGEDGFQENRPAPAHSLPDMRSLVNSFVITAISEPYGMLKETSEKLEGNDQFEGFG  
IELIDELSKKLGFSYTWRLQEDNKYGGIDPKTGEWNGMLREIIDSRAADMGITDLTMTSERESGV  
DFTIPFMSLGIGILFRKPMKEPPKLSFMSFSGEVWLWLGLAYMGVSISMVFLGRLSPAEDWN  
PYPCIEEPTLENQFSFANCLWFSIGALLQQGSELAPKAYSTRAVAASWWFFTLILVSSYTANLA  
AFLTVESLVTIPINDADDLSKNKGGVNYGAKIGGATFNFFKESNYPTYQRMYEFMRDNPQYMT  
NTNQEGVDRVENSNYAFLMESTTIEYITERRCTLTQVGALLDEKGYGIAMRKNWPYRDLSQA  
VLEMQEQGLLTKMKTWWQEKRRGGACSEAPSDASSLGFANLGGVYLVFMFVSGFCFSIYG  
LVNCVSVYLRARENKVSFKTELLDEIRFILQCSGNTKAVKYPKNSSRSNASSKSKGSSMSVDS  
LPEDTSEADASGKHNNKK

>DmelCG9935

MLIASGFLLFQFLSYGLGVPLVRIGAIFSNQPGMYNSELAFRYAIHRLNMDKSLLPETTVDYY  
VEYVNRFDSEFETVQKVCKLIRVGVQAVFSPTDSVLATHINSICDALDIPNIGRSAHDFSINVYPSK  
QLVNYAFNDVIQYLNWTRFGILHEKENGIIHLQLSRSFHGEVHMRQVSRDSYVSALNEFKGK  
EIHNIIDTNSNGISILLKNILQQQMNEYKYHYLFTSFDLETYDLEDFKYNFVNITSFRLVDTADV  
GVKQILKDIGLYSHHIFKPYLNLHIKKSTILESEPALMFDSVYVFAIGLQTLEQSHSLTLLNISCE  
EENSWDGGLSLINYLNAVEWKGLTGPIQFKDQQRVQFKLDLIKQHSIVKVGWTPHGLNI  
TEPSMFFDAGSMNVTLVVITILETPYVMMHYGKNFTGNERFYGFCVDILETISREVGFDYILD  
VPDRKYGAKDPETGEWNGMVAQLMKYADLAVGSMTITYARESVIDFTKPFMNLGISILFKVPT  
SEPTRLFSPMNPLAIEIWIYVLIAYFLVSLCIYIVGKLSPIEWKCINACDLENISIGNQFSLTDSFWF  
TIGTFMQQSPDIYPRAMSTRIISSTWGFFSLIIVASYTANLAAFLTTERMINPIENAEDLASQTEIS  
YGTLDSGSTMTFFRDSVIETYKKIWRSMNKKPSAFTTTYEDGIKRVNQGNYAFLMESTMLDY  
IVQRDCNLTQIGLLDTKGYGIATPKGSPWRDKISLAILELQERGDIMLYDKWWKNTDETCT  
RKNTSKQSKANSLGLESIGGVFVVLIAAGIIVAAVAFEFWYNFRYNYEATPSQSVVNNKYNQD  
GILESERNYTPPDRSFWIEIAEELRYASWCMNKQKRPALTRTCSKCTIPKGQRINKL

>Dmelclumsy

MYSLFLTHFLLIAPVLADIDRSQFMVGSIFTSKDESEIAFRTAVDNANILERNVELVPIVVYAN  
TDDSFIMEKMCNLSIQGVIAIFGPSTGSSSDIIASICDTLDIPHIVYDWIPNESIPDREHSTMTLN  
VHPDNLLLSQGLAEIVQSFARWSFTVVYETDKELQQLQDILQVGEPIPNPTTVKQLGPGDDHRP  
FLKEIKLSTDNCLILHCAPDNLLKILQQANELKMLGEYQSVFIPLDTHSIDFGELSGVEANITT  
VRLMDPSDFHVKNVVDWEEREKREGRYFKVDPNRVKSQMILLNDAVWLFSGKLTGELGIFEE  
LTAPDLECRKPKPWFGRKRIIEFIKARSEETSTGRIDFNENGQRSFFTLRFMELNSDGFLLATW  
DPVNGLDVLDNDEESEKRVGQKLSNKTIVSSRLGAPFLTLREPQEGEILTGNSRYEGYSIDLIN  
EIAKMLNFKFEFRMSPDGKYGALNKVTQTWDGIVRQLIDGNADLGICDLTMTSSRRQAVDFTP  
PFMTLGISILFSKPPTPPTDLFSFLSPFSLDVWIYMGSAYLFISLLLFALARMAPDDWENPHPKCE

PEEVENIWSIMNTTWLSIGSLMGQGCILPKAASTRLVGTGMWFFALMMLNSYTANLAAFLT  
NSRQANSINSAEDLAAQSKIKYGAMAGGSTMGFFRDSNFSTYQKMWTAMESASPSVFTKTND  
EGVERVQKGNLYAFLMESTTLEYNVERKCDLVQIGGWLDYKSYGIAMPFNSPYRKQISAAVL  
KLGELGQLAELKRKWWKEMHGGGNCEKSDEEDGGDTPELGLENVGGVFLVLGLGLLSAMVL  
GCTEFLWNVKSVAIEEKISLKEAFKSEALFAARIWITTKPVHTSSESGSSNSSSSSSSSRSKHSFKS  
QGLSMKSLKSSGYQDVEASVHSLKLLKIGSMFSLKSQKTVTPPEIGWKLDKSTQIDVVPTSDV  
DQELIPEVEPHLPHRHHHHHHHRHHHHHHHQPDQEHDRNPSPE

>DmelGlu-R1

MHSRLKFLAYLHFICASSIFWPEFSSAQQQQQTVSLTEKIPLGAIFEQGTDDVQSAFKYAMLNH  
NLNVSSRRFELQAYVDVINTADAFKLSRLICNQFSRGVYSMLGAVSPDSFDLHYSNTFQMPF  
VTPWFPEKVLAPSSGLLDFAIMSRPDYHQAIIDTIQYYGWQSIYLYDSDHGLLRLQQIYQELKP  
GNETFRVQMVKRIANVTMAIEFLHTLEDLGRFSKRRIVLDCPAEMAKEIIVQHVRDIKLRRTY  
HYLLSGLVMDNHVPSDVVEFGAINITGFRIVDSNRRAVRDFHDSRKRLEPSGQSQSQNAGGPN  
SLPAISAQAALMYDAVFLVEAFNRILRKKPDQFRSNHLQRRSHGGSSSSSATGTNESSALLDC  
NTSKGWVTPWEQGEKISRVLKVEIDGLSGEIRFDEDGRRINYTLHVVEMSVNSTLQQVAEWR  
DDAGLLPLHSHNYASSRSASASTGDYDRNHTYIVSSLLEEPYLSLKQYTYGESLVGNDRFEGY  
CKDLADMLAAQLGIKYEIRLVQDGNYGAEQYAPGGWDGMVGEIRKEADIAISAMTITAER  
ERVIDFSKPFMTLGISIMIKKPVKQTPGVFSFLNPLSQEIWISVILSYVGVSVFLYFVTRFPPYEW  
RIVRRPQADSTAQQPPGIIGGATLSEPAHVPPVPPNEFTMLNSFWYSLAAFQQGCDITPPSIA  
GRIAAVWWFFTIILISSYTANLAAFLTVERMVAPIKTPEDLTMQTDVNYGTTYGSTWEFFRRS  
QIGLHNKMWEYMNANQHHSVHTYDEGIRRVRSKGGYALLVESPKNEYVNARPPCDTMKVG  
RNIDTKGFGVATPIGSPLRKRLNEAVLTLKENGELLRIRNKWWFDKTECNLDQETSTPNELSLS  
NVAGIYYILIGLLLAVIVAIMEFFCRNKTPQLKSPGNSGAGGVPGLASSTYQRDSLSDAIMH  
SQAQLAMQASSEYDERLVGVELASNVRYQYSM

>DmelGlu-R1B

MRFGLKLSCLWPSFLLWLTWSSGGGGGSGVGVSAQPSLTEKIPLGAIFEQGTDEVQSAFKYAM  
LNHNLNVSRRFELQAYVDVINTADAFKLSRLICNQFSRGVYSMLGAVSPDSFDLHYSNTFQ  
MPFVTPWFPEKVLTPSSGFLDFALSMRPDYHQAIIDTIQFYGWRKIIYLYDSDHGLLRLQQIYQG  
LRPGNESFQVELVKRISNVSMIAIEFLHTLEQIGRFENKHIVLDCPTEMAKQILIQHVRDLRLGRR  
TYHYLLSGLVMDRWESEIIEFGAINITGFRIVDTNRRLVREFYDSWKRLDPQMSVAGRESIS  
AQAALMYDAVFLVEAFNKILRKKPDQFRNNSVQRRSQTLMVAQAAASTSSDGYNYSASGGG  
GGNGGAGGGFAGSDSGSGGMSRDLDCNTAKGWVNAWEHGDKISRYLRKVEIEGLTGDIK  
FNDDGRRVNYTLHVVEMTVNSAMVKVAEWNDAGLQPLNAKYVRLRPHVEFEKNRTYIVTT  
VLEOPYIMLKQVAFGEKLGNNRFEGYCKDLADLLAKELGINYELRLVKDGNYGSEKSSAHG  
GWDGMVGEVLRKEADIAIAAMTITAERERVIDFSKPFMSLGISIMIKKPVKQTPGVFSFMNPLS  
QEIWVSVIFSIVLFFVSRFSPHEWRLVQQPQQSQSPDPHAHHEQLANQQPPGIIGGAPL  
PAPPGPPTPGAQTAAGAAALQAALSAGSPGSGSSSAVVNEFSVWNSFWFLAAFMQQGCDLS  
PRSVSGRIAAASWFFFTLILISSYTANLAAFLTVERMVTPINSPEDLAMQTEVQYGTLLHGSTW  
DFFRRSQIGLHNKMWEYMNRSRKHVFVPTYDEGIKRVNRNSKGGYALLVESPKNEYVNAREPCD  
TMKVGRNLDTKGFGIATPLGSALKDPINLAVLTLKENGELIKLRNKWWYEKAECSTHKDGETS  
HSELSLNVAGIFYLIGLLVSVFVAILEYCFRSRDSRSASSGSGMGLGMGLGGGMSGGSLGK  
ANGSMMLGPSSAVPGMPSSHQRSTLDTMHAKAKLTIQASRDYDNGRVGYLNCASLQYYPP  
AQLSATPPDAGDSLHMNAHGQVXHEHAQESRLXRTPCAPTIRRIMANSRQETEKMMGGGGH  
GTVTVSVPATCSSSMNGSHEGSLALSPSSGSATLMRHSPDINQHPYGK

>DmelGluRIIA

MRLCPVVIYAFIIIIGFLEGIIALGGDDRNEITVGAIFYENEKEIELSFDQAFREVNNMKFSELRFV  
TIKRYMPTNDSFLLQQITCELSINGVAAIFGPSSKAASDIVAQIANATGIPHIEYDLKLEATRQEQL  
NHQMSINVAPSLSVLSRAYFEIIKSNYEWRTFTLIYETPEGLARLQDLMNIQALNSDYVKLRNL  
ADYADDYRILWKETDETFHEQRILDCPKTLKELLKVSIDFKLQGPFRNWFLTHLDTHNSGLR  
DIYNEDFKANITSVRLKVV DANPFERKKTRLT KV DQILGNQTMPLIYDAVVLFASSARNVIA  
AMQPFHPPNRHCGSSSPWMLGAFIVNEMKTISEDDVEPHFKTENMKLDEYQRIHFNLEIYKP  
TVNEPMMVWTPDNGIKRLLNLELESAGTTQDFSEQRKVYTVVTHYEOPYFMMKEDHENFR  
GREKYEGYAVDLISKLSSELMEDYEFMIVNNGNGKYNPETKQWDGIIRKLIDHHAQIGVCDLTIT  
QMRRSVVDFTVPFMQLGISILHYKSPPEPKNQFALEPF AVEVWIYMIFAQLIMTLAFVFIARLS  
YREWLPPNPAIQDPDELENIWNVNNSTWLMVGSIMQQGCDILPRGPHMRILTGMWVFFALM  
MLSTYTANLAAFLTSNKWQSSIKSLQDLIEQDKVHFGSMRGGSTSLFFSESNDTDYQRAWNQ  
MKDFNPSAFTSTNKEGVARVRKEKGGYAFLMETTSLTYNIERNCDLTQIGEIQIGEKHYGLAVPL  
GSDYRTNLSVSILQLSERGELQKMKNKWWKNHNVTCDSEYHEVDGDELSIHELGGVFLVLAGG  
VLIGVILGIFEFLWNVQNVAVEERVTPWQAFKAELIFALKFWVRKKPMRISSSSDKSSSRSSGS  
RRSSKEKSRSKTVS

>DmelGluRIIB

MHGLQFLVLLALAIASGANEDTLVIKIGAIFFDTEMKLADAFSAALEEVNAINPALKLDAIKRY  
VTVDDSIVLQDISCDLIGSGVAAIFGPSSKTNSDIVEVLCNMTGIPHLQFDWHPQQSNRERMNH  
QLTVNVAPMELFLSAAFSDILASKTFDWKSFTIAYERSSSLRLQHLAWKQLHKAGIKMQEFE  
RGDDYRILWKRINNAREKFVLLDCPSDILVDVINASIGYNMTGSFNHLFLTNDTHLSGIDGFYS  
RDFTVAVAAVRIRTYVPPPVHDEIDVFDNSVDTRFSSLSQLVYDSIVL FYNALLEISQRPGFYIP  
NFSCGRGFWQGPRLVEQMKQITPKMVKPPFKTQRLQINADGQREDFNLEVYNPIIDRVTHIW  
NKEFQLVDFEKLRENSTQALKQKRLQNKEDFSQPIRYTVATRVGKPYFSWREEPEGVHYEGN  
ERFEGYAVDLIYMLAQECKFDNFEPVRDNKYGSYDANTDEWDGIIRQLIDNNAQIGICDLTIT  
QARRSVVDFTVPFMQLGISILSYKEPPPKADIYAFLNPNYAEVWLFVMIAMMITAFALIFTGRID  
QYEWDPVENVNREMERQNIWHLSNALWLVLGSMNLNQGCDLLPRGLPMRLLTAFWWIFALLI  
SQTYIAKLAAFITSSKIAGDIGSLHDLVDQNKVQFGTIRGGATS VYFSESNDTDNRMAWNKMLS  
FKPDAFTKNNEEGVDRVKLSKGTYAFLMETTNLQYYVQRNCELQIGESFGEKHYGIAVPLNA  
DFRSNLSVGILRLSERGELFKLRNKWFNSNESTCDSNVPTIDDGQFDMDSVGGFLVVLIVGVV  
VGLVIGVAEFLWHVQRISVKEKIPMLALKAEFYFVIRFWLTRKPLHTYRQSRDSTSTGYSSLEQ  
ITSASSAKKKKTRRIEK

>DmelIR87a

MSTPEQRFWLAALLFLLSQHSEVRGFGINLMKVQTEDKGQEACILALLRKYFDSGDGLSGSVL  
CINRNYQLPNIEEQLLRGVNNYENYPWSLLITNSREGPSPAKFLMNEKPQCYFLIVDNLEDEDL  
DEVFEHWKGMVNVNPLAQFVVYLASLEETDEEMNDLMVELLTFINKKIFNVNVIGQSEENQ  
FYYGKTVPYPYHPDNNCGNRVISVELLDACDYPSEETDSEDEDEDEGDGAQEEDDGPQEEGD  
GEQEEEDGPQEEDGDQAKGDEGQENDDGGLENKVENEFRIGASDDDELENDLSSNSSEPEAI  
IEEFFRAKFEDKFPRLSGCPLTASFRPWEPYIFRNSEEQPVDDYYGLQGEDDYNDTSPNYG  
ESDDESYADPGEDGDGAIPDTETQSGGKLLKSGIEYEMVQTIAERLHVSIEMQGENSNLYHLFQ  
QLIDGEIEMIVGGIDEDPSISQFVSSIPYHQDELWCVARAKRRHGFFNFVATFNADAGFLIGIF  
VVTC SLVWLAQRVSGFQLRNLNGYFPTCLRVLGILLNQAIPAQDFPITLRQLFALSFLMGFFFS  
NTYQSFLISTLTTPRSSYQIHTLQEIYSNKMTVMGTSEHVRHLNKGGEIFKYIREKFQMCYNLV  
DCLNDAAQNEHIAVAVSRQHSFYNPRIQRDRLYCFDRRESLYVYLVTMLLPKKYHLLHQINPVI

QHIIESGHMQKWARDLMRRMIHEEITRVREDPFKALTFDQFRGAIASFSGLLLVASCVFAFELC  
YVKYVYRTEKRERKTKKITKKVHNIQHD

>DmelIR21a

MSYYWVALVLFQAQAFSIEGDRSASYQEKCISRRLINHYQLNKEIFGVGMCDGNNENEFQKR  
RIVPTFQGNPRPRGELLASKFHVNSYNFEQTNSLVGLVNKIAQEYLNKCPPVIYYDSFVEKSDG  
LILENLFKTIPTFYHGEINADYEAKNKRFTSHIDCNCKSYILFLSDPLMTRKILGPQTESRVVLS  
RSTQWRLRDFLSSSELSSNIVNLLVIGESLMADPMRERPYVLYTHKLYADGLGSNTPVVLTSWIK  
GALSRRPHINLFPKQFGFAGHRFQISAANQPPFIFRIRTLDSGGMGQLRWDGVEFRLLTMISKRL  
NFSIDITETPTRSNTRGVVDTIQEQUIERTVDIGMSGIYITQERLMDSAMSVGHSPDCAAFITLAS  
KALPKYRAIMGPFQWPVWVALICVYLGIFPIVFTDRLTSLMLMGNWGEVENMFWYVFGMFT  
NAFSFTGKYSWSNTRKNSTRLLIGAYWLFTHITSCYTGSIIFVTLPAFPDPTVDSVLDLLGLFFR  
VGTLNNGGWETWFQNSTHIPTSRLYKKMEFVGSVDEGIGNVTQSFFWNYAFLGSKAQLEYLV  
QSNFSDENISRRLALHLSEECFALFQIGFLFPRESVYKIKIDSMILLAQQSGLIAKINNEVSWVMQ  
RSSSGRLLQASSNSLREIIEERQLTTADTEGMFLLMALGYFLGATALVSEIVGGITNKCRQIK  
RSRKSAASSWSSASSGSMRLTNAEQLSHDKRKANRREAAEVAQKMSFGMRELNLTRATLREIY  
GSYGAPETDHGQLDIVHTEFPNSSAKLNNEDEESREALESLQRLDEFMDQMDNDGNPSSHTF  
RIDN

>DmelIR76b

MATGIELLVAAALCVACPLNDSPPTNLIQMGENGTLSPVTELPMDVDASEAGFDADAPVETLE  
TINRKKPKLREMLDWIGGKHLRIATLEDFPLSYTEVLENGTRVGHGVSFQIIDFLKKKFNFTYE  
VVVPQDNIIGSPSDFDRSLIEMVNSSTVDLAAAFIPSLSDQRSFVYYSTTTLDEGEWIMVMQRP  
RESASGSGLLAPFEFWWILILVSLAVGPIIYALILRNRLTGDGQQTPYSLGHCAWFVYGALM  
KQGSTLSPIADSTRLLFATWWIFITILTSFYTANLTAFLTLKFTLPYNTVNDILTGNKHFVSMRG  
GGVEYAIRTTNESLSMLNRMIQNNYAVFSDETNDTYNLQNYVEKNGYVFRDRPAINIMLYRD  
YLYRKTVSFSDEKVHCPFAMAKEPFLKKKRTFAYPIGSNLSQLFDPELLHLVESGIVKHLKSKRNL  
PSAICPQDLGGTERQLRNGDLMTTYIMLAGFATALAVFSTELMFRYVNSRQEANKWARHGI  
GRTPNGQSVAPSRWLRGWRRLNSGHGQLLGASTHGQNVTPPPPYQS  
IFNGGSHGDPLNRWRRPLANGNALGNGVLLGGDSEGGVRRRLINGRDYMFVRNPNGQSQLVPV  
RSPSAALFQYSYTE

>DmelGluRIIC

MWQRILLGCMWSAFFMCRSRGQQINIGAFFYDDELELEKEFMTVVNAINGPESEQTMRFYPL  
IKRLKPEDGSVTMQEHACDLIDNGVAAIFGPSSKAASDIVALVCNSTGIPHIEFDISDEGIQAEKP  
NHQMTLNLYPAQAILS KAYADIVQNFGRKFTIVYDADDARAAARLQDLLQLREVHNDVVRV  
RKFHKDDDFRVMWKSIRGERRVLDCEPNMLVELLNSSTEFGLTGQYNHIFLTNLETYTDHLE  
ELAADNETFAVNITAARLLVNPDPYPYSLPYGYVTQRDNIVYESSDPPRTLIHDLIHDALQLFAQ  
SWRNASFFYPDRMVVPRITCDFAASGGRTWAMGRYLARLMKGTSGVNNTNFRSILQFDEDG  
QRITFNIEVYDPLDGIGIAIWDPRGQITQLNVDVKAQKKMIYRVATRIGPPYFSYNETARELNLT  
GNALYQGYAVDLIDAIARHVGFYVFPVADQYQYGLDKETKQWNGIIGEIIINNDAMGICDL  
TITQARKTAVDFTVPMQLGVSILAYKSPHVEKTLDAYLAPFGGEVWIWILISVFMFLKTIVA  
RISKMDWENPHPCNRDPEVLENQWRIHNTGWLTVASIMTAGCDILPRSPQVRMFEATWWIFAI  
IANSYTANLAAFLTSSKMEGSIANLKDLSAQKKVKFGTIYGGSTYNLLADSNETVYRLAFNLM  
NDDPSAYTKDNLEGVDRVRKNRGDYMFLETTTLEYHREQNCDLRSVGEKFGKHYAIAVP  
FGAEYRSNLSVAILKLSERGELYDLKQKWWKNPNASCFEEDPDATPDMTFEELRGIFYTLYAG  
ILIAFLIGITEFLVYVQQVALEERLTFKDAFKKEIRFVLCVWNNRKPVAGTPISSVRTTPRRSLDK

SLDRTPKSSRRVVIGRSSEEMREMAQGS GSSSGSNNAGRGEKEARV

>DmelGluRIID

MHFCWISLILSLSRVQAQFYGGNAYEASSGQSIRLGLITDDATDRIRQTFEHAISVVNNELGVPL  
VGETEQVAYGNSVQAFACLRLMQSGVGAVFGPAARHTASHLLNACDSKDIPFIYPHLSWGSN  
PDGFNLHPSPEDIANALYDIVNQFEWSRFICYESA EYLKILDHLMTRYGIKGPVIKVMRYDLN  
LNGNYKSVLRRIRKSEDSRIVVVGSTTGVAELLRQAQQVGIMNEDYTYIIGNLNLHTFDLEEK  
YSEANITGIRMFSPDQEEVRDLMEKLHQELGESEPVNSGSTFITMEMALTYDAVRVIAETTKHL  
PYQPQMLNCSEHRDNDVQPDGSTFRNYMRSLEIKEKTITGRIYFEGNVRKGFTFDVIELQTSGLV  
KVG TWEEGKDFEFQRPPQAVNFNDIDDGSLVNKTFIVLISVATKPYASLVESIDTLIGNNQFQGY  
GVDLIKELADKLGFNFTFRDGGNDYGSFNKTTNSTGMLKEIVEGRADLAITDLTITSEREEVID  
FSIPFMNLGIAILYVKPQKAPPALFSFMDPFSSEVWLYLGIAYLGVSLCFFIIGRLSPIEWDNPPYPC  
IEEPEELENQFTINNSLWFTTGALLQQGSEIAPKALSTRTISAIWWFFTLIMVSSYTANLAAFLTIE  
NPTSPINSVKDLADNKDDVQYGAKRTGSTRNFFSTSEPIYIKMNEYLNAPHEMLMENNQQGV  
DKVKS GTKYAFLMESTSIEFNTVREC NLTKVGDPLDEKGYGIAMVKNWPYRDKFNKALLELQ  
EQGVLARLKNKWWNEVGAGVCSAKSDDDGPSELGVDNLSGIYVVLVIGSIISIIISILCWCFV  
YKAKNYEVPFCDALAEFRIVIRFSENERPLKSAQSIYSRSRNSSQSIESLKT DSEENMPVED

>DmelGluRIIE

MFFNH FVILWSLFSIHISVNWAQYENFGGYDNYQSLESVPIGLLTDQNT EQMNIVFDHAIDVAN  
QEVGTSLTSLKEEVNYGDAYQSYGKLCRML ETGIAGVFGPSSRHTAVHLMSICDAMDIPHIYSY  
MSENAEGFNLHPPADLAKALYSLITEFNWTRFIFLYESA EYLNILNELTTMLGKSGTVITVLR  
DMQLNGNYKQVLRVRKSVNDRIVVVGSETMPEFLNQAQQVGIINEDYKYIIGNLDFHSFDL  
EYKYSEANITGLR LFSPEKMAVKELLMKLGYP TDQDEFRNGSCPITVEMALTYDAVQLFAQT  
LKNLPFKPMPQNC SQRTE SVRDDGSSFKNYMRTLRLTDRLLTGPIYFEGNVRKGYHLDVIELQP  
SGIVKVG TWEDRQYRPQRLAPTTAQFDSVDNSLAN KTFIILLSPNKPYAQLVETYKQLEGNS  
QYEGYGVDLIKELADKLGFNFTFVNGGNDYGSYNKSTNESTGMLREIMTGRADLAITDLTITS  
EREQALDFTIPFMNLGIAILYKPKATPELFTFMDPFSSEVWWFLGFSFLGVSLFFILGR LSPS  
EWDNPPYPCIEEPEELENQFTLGN SIWFTTGALLQQGSEIGPKALSTRTVASFWWFFTLIVSSYT  
ANLAAFLTIEK PQLINSVDDLADNKDGVVYGAKKTGSTRNFFMTSAEERYKMKMNFMS ENP  
QYLTEDNMEGVNRVKNTHYAFLMESTSIEYNTKREC NLKKIGDALDEKGYGIAMRKDWPHR  
GKFNNALLELQE QGVLEKMKNKWWNEVGTGICATKEDAPDATPLDMNNLEGVFFVLLV GSC  
CALLYGIISWVLFVMKKAHHYRVPLRDALKEEFQFVIDFN NYVRVLKNSASIYSRSRQSSMSVA  
SVAQESQ

>DmelNmdar1

MAMAEFVFCRPLFGLAIVLLVAPIDAAQRHTASDNPSTYNIGGVL SNSDSEEHFSTTIKHLNFDQ  
QYVPRKVTYYDKTIRMDKNPIKTVFNVC DKLIENRVYAVVVSHEQTS GDLSPA AVSYTSGFYSI  
PVIGISSRDAAFSDKNIHVSFLRTVPPYHQADVWLEMLSHFAYTKVIIIHSSD TDGRAILGRFQ  
TTSQTYDDVDVRATVELIVEFEPKLESFTEHLIDMKTAQSRVYLMYASTEDAQVIFRDAGEYN  
MTGEGHVWIVTEQALFSNNTPDGVLGLQLEHAHSDKGHIRDSVYV LASAIKEMISNETIAEAP  
KDCGDSAVNWESGKRLFQYLKSRNITGETGQVAFDDNGDRIYAGYDVINIREQQK KHVVGKF  
SYDSMRAKMRMRINDSEIWP GKQRRKPEGIMIPHLRLLTIEKPFVYVRRMGDDEFRC EPDE  
RPCPLFNNSDATANEFCCRGYCIDLLIELSKRINF TYDLALSPDGQFGHYILRNNTGAMTLRKE  
WTGLIGELVNERADMIVAPLTINPERAEYIEFSKPFKYQGITILEKKPSRSSTLV SFLQPFSNTLWI  
LVMVSVHVVALVLYLLDRFSPFGRFKLSHSDSNEEKALNLSSAVWFAWGVLLNSGIGEGT PRSF  
SARVLGMVWAGFAMIIVASYTANLAAFLVLERPKTKLSGINDARLRNTMENLTCATVKGSSVD



MYFRRQVELSNMYRTMEANNYATAEQAIQDVKKGKLMAFIWDSSRLEYEASKDCELVTAGEL  
FGRSGYGIGLQKGGSPWTDVTLAILEFHESGFMEKLDKQWIFHGHVQQNCELFEKTPNTLGLK  
NMAGVFILVGVGIAGGVGLIIIEVIYKHKHVKKQKRLDIARHAADKWRGTIEKRKTIRASLAM  
QRQYNVGLNSTHAPGTISLAVDKRRYPRLGQRLGPERAWPGDAADVLRIRRPYELGNPGQSPK  
VMAANQPGMPMLGKTRPQQSVLPPRYSPGYTSDVSHLVV

>DmelNmdar2

MMPSRVKLRGTDGPTPTPTMPTTMRKHTPIATLNTASCQHNSTTSRRKRILTPPSGPISLLLLT  
VLTLILDLTRSCQGLRLTNGGGSLSKGAAANKEQLNIGLIAPHTNFGKREYLRSINNAVTGLTKT  
RGAKLTFLKDYSFEQKNIHFDMMSLTPSPTAILSTLCKEFLRVNVSAILYMMNNEQFGHSTASA  
QYFLQLAGYLGIPVISWNADNSGLERRASQSTLQLQLAPSIEHQSAAMLSILERYKWHQFSVVT  
SQIAGHDDFVQAVRERVAEMQEHFKFTILNSIVVTRTSDLMELVNSEARVMLLYATQTEAITLR  
AAEEMKLTGENYVWVVSQSVIEKKDAHSQFPVGMGLGVHFDTSSAALMNEISNAIKIYSYGVE  
AYLTDPANRDRRLTTQSLSCEDRGRWDNGEIFFKYLRNVSIEGDLNKNPNIETADGDLRSAE  
LKIMNLRPSANNKNLWEEIGVWKSWEQKLDIRDIAPGNSHAPPQGVPEKFHLKITFLEEA  
PYINLSPADPVSGKCLMDRGVLCRVAADHEMAADIDVGQAHRNESFYQCCSGFCIDLLEKFAE  
ELGFTYELVRVEDGKWGTELENGKWNGLIADLVNRKTDMLVTLTSLMINTEREAVVDFSEPFMET  
GIAIVVAKRTGIISPTAFLEPFDASWMLVGIVAIQAATFMIFLFEWLSPSGYDMKLYLQNTNVTP  
YRFSLFRTYWLWVAVLFQAAVHVDSRPGFTSRFMTNVWALFAVVFLAIYTANLAAFMITREEF  
HEFSGLNDSRLVHPFSHKPSFKFGTIPYSHTDSTIHKYFNVMHNYMRQYNKTSVADGVAAVLN  
GNLDSFIYDGTVDYLVAQDEDCRLMTVGSWYAMTGYGLAFSRNSKYVQMFNKRLLFRAN  
GDLERLRRYWMTGTCRPGKQEHKSSDPLALEQFLSAFLLLMAGILLAALLLLEHVYFKYIRK  
RLAKKDGGHCCALISLSMGKSLTFRGAVFEATEILKKHRCNDPICDTHLWKVKHELDMSRLRV  
RQLEKVMKDHGKAPQLRLASSDLLNHHHLKERPPLLGNLSLAASAQDLYRWSYKTEIAEME  
TVL

>Vd18951

MLFLIGTQLSRSRPPSTRPSPQSRGTGNSSADWADSRRLFVYSSLLLLFVTRCAALPPVINVGGLF  
DNEDDEQDFAFRVAIERVNNDQSILLKSRVPRVERVEKDDCFRATKKVCTLLREGIAGIFGPTS  
DVTSMHVQSICDALDVPHEMRWDFQLQRDDLINLFPKPSILAQAYVDLIKTWDWKSFALV  
YEDHEGIRLKDFIKARREGWKIQMYQFVNEPYRDLFWKIKKSEQN  
RVVLDVHRKNLYECLKHAQQVGMILTESHSYLISSLDLHTVDLEEFKYGQTKITGLRLVDVESP  
ELQNFLDDWKRLAQPKHVRAPPAPGPHLIK TETALMYDAVKLFAMGLQQLDLTKAVDFPVIS  
CDAEASSSDGSSLINLMRPITLQGLTGDIFSDSQGFRSTFQLDVMSLKT DGLQKVG YWNPQR  
VVVEDNSTSDYDSLRLRNKTLIVSTVLTDPYMMMLKESAKFLTGNERFEGYCVDLLQELSKDLG  
FSYEIRLAADGAYGIKSDTG VWNMGIGEVVYGKADLAIADLTITSAREA AVDFTMPFMNTGISI  
LFKKPTQKATSLFGFLSPFSTEVWTVYVVGAYLGVSCVFLVGRMSPYEWDNPHPCRQNDQVL  
ENSFLLNSMWF TIGSLMQGSDLAPKAMSTRVAGIWFYFFTLIMISSYTANLAAFLTVEKTVY  
PVESAEDLAKQTKIQYGCVKSGSTRAFFKESKIPTFMKMHKFMEERN TYVATSAEGKQRVSN  
DYAFLMESASIEFLVERNCNLTQIGSLLDNKGYGIVTVKNSPFRQVLSSGILQLQEAGKLHSFKE  
KWWKERKGGGKCTDDTKSSAVTELSLANVGGVFVLLLGLLLAALVGVIAEFLWKARSLSKE  
DKVSIKSEMLKQLKFAVSCRSTMPVRSRQTPELD TVDANNLSNRYGISTLPSFTSDF

>Vd20015

MSSDDVSDWPQSSPATKTRPTAAWQVPRLELRLKAGSAKTQAVMNNQWNQRVNDTNRYSSY  
KYGIKKNKNTNYQDLLNSQDFDKVTAGQRVIPGDRVSNLRLNHRFQCRCLDTRTPFIDYQLEPR  
SRDHVLSMVMVNSIQTSASSFLCPTRSSLEKQIDVNVFLLEIYNTTEITNNHNDLTLKSKAVTTTS

TVLNACKNHGGMISNICRNDNSNEVYADDDKDGDEQKGGDDDDNYSSTTSTLDHNSQQLAIGKPE  
LLSLWRSPVWPAHMPSKAESKYLRDPEAKPRKRYRLNRQRSLDVTARNDEPLVCIRQLIHRLA  
SRYVATSLYTVSGTGMGNALLPLMVVLAACLPASVDGAKSSTDAFAIGGVFDQGENSHLDE  
HLSRAVERVNRDGAALLRGRELQSISFKTNPGDVASKVCVCELARQGVVALVGPTSWQVATYV  
ASAAARLHVPHLKTSAGGFRERRSPFSLQLHPAVNQLNKAYYDLIKSRKWKSFAVLYDNDNVF  
VALKDVLNASLNPPNVLMPYPNALSFKKMLKDIGSKNIYNIILHLELTKVPQLFREAEVNT  
TLYHDYIVMGLDFHTLDLREFYSLKANVTAFRIIDPDRVAVQLVRRDWALTQGLQPDGSGVSASH  
SKGLGSPGKRGLTGTALFWRKPRDLSSGLPASIDQMSTAEALLYDAVSLVAAGVEALLEKDKKE  
AAKDNKAAKGDNSKDKDLRAGPLVLSQLDCNRSAHWEHGKALLEAIKGARIRGLSGDLRL  
NRRRTGTRDEFGLDVVELKYTGLKCIASWSPREGLKLNANRTEQEADLSRTLEGMTLRVTV  
LNEPYTMLHPPSENRTGNDRFYGYAIDLIAALASLYKFNYTFYISPDRKYGSRQPDGKWNMGV  
GELIQRKADIAVVDLTITYEREQVVDFITPFMNTGISILFKKPEKSEPAIFSFLYPFSIVVWFYTLTV  
YTFVSILVYVLGRFTPYEWVPSHPCDPQSEPNQFSSLQNAFWFTMGSIMQOGSDLVPRAISTR  
VLASIWYFFTLILISSYTANLAAFLTAARMGAPIENANDLAKQTKIAYGCLGGGTYGFFKHN  
DPVMKRMWTYMETARPAVFTSSNKEGIERVLRGDYAYLMEALSIEYLVERNENLTQIGLLDN  
KGYGIATPLKSPLRSALTSAILILQEKGVLSLKMWWKQGGGLVKCDDEKASSTSEMDMG  
SVGGVFLTLVIGCTVGVIIIVCEFCWKRAKLPYQQRGHILCEFFKEMRHVLACQGSRPNFDSR  
EDMDDQTQDMDGAVGTGAAGALHDEADAPGVALADSLHLHLQQRQIANLNSMSSGESGVVA  
KTKIARPATLQDIRELRLHDLQYHQFRQKQHQYNGNSHSGSDPQSGSKAHIGSGSFSRQT  
SASHLSRTGTLQSRHSNHSVRSSTTDSVHSMPSVHSNHWGVYEN

>Vd20731

MSSFAASLAATIDPVRSQLLLSLASLSILLSALHRSQAIDHVNIGGIFDQEDEGLANHFTLAVDRV  
NRDLGMLGATKFQAKMFRVTPKDSFGASKRVCELARHKVAAFVGPSSPSVKELVKATAFRLN  
VPHVSTSWELHERQSPYTLRMYPEADLLARAYRDIIEKKWKKFAIFYDSDDLVLMKYVLA  
DGFNQATAPDVLLYEFDPDLSYEKMLKDIGTRNHFNVIIIGLRPDRVKEALLAEGSYSSFYHSYL  
ILGLDFHSYKMEEVVMQRYLANVTMFRVLDPSRSEFQEVNRRPRSNSQLPTDSSIFGHVDAPN  
VWAPPSTTPDDLDVERLTTEEALMYDAVSLIANGVHNLLRMNILGFQQLDCNKNTSNWDYG  
QLFLDHMKELTIRGLTGDVRLDKEGKRDMFTLDVLELNKGSQKWSFLKSSWDPTTGINKPE  
GDEAVHDVEFSVSGMILKVVTVENAPYTIINHSLTGQDRFYGYAIDLIKMLAEKANFTPEFYIAP  
DSAYGSHIGGGVWNGMIGDLMKHKADIAIVDLTTAERESVVDFTTTPFMNTGISILLRTPMQP  
PSLFSFLHPPSPLVWFYTLTVYILITVAVYVLGRFTPYEWVPSHPCDPDSEPNQFGTISDCFWFT  
MGSIMQOGSDLVPRAVSTRTLASLWYFFCLILISSYTANLAAFLTAARMSSPIENANDLAKQTDI  
AYGAKDGGSTKRFFQNSNNTVYKRMWAYMESQKPSVFPKTNEEGIQRVLKGDYAYLMEVTSI  
DYLVERNENLTQIGLLDNKGYGIATPQGSQVRGILEHHLIIMQEKGVLQELKDLWWKIPGEP  
DRVKDDSAEMSMESLGGVFYTYLGGVLIQVVALIEFWWEKSQAPYGERDHILVEFLRELKLV  
LTCTGSRPNPESADNSIADDAASRRSGHSRQASQVFATLNT

>Vd20855

MHITIETSSKTGQSCTLNKSGHHRHTTYQNHGRPAWGKCRSFTLQRPLKANDAAFKIGTSPRR  
QIEEHPLRSNSSVEAAYVTRTNHGQWPSVRHKWSSPSSSCLPNLINKTWPRWHSRWHLAVAV  
FVIDCSLLMLPNHVGAAGKLPDRIPVGAIFLKEGETELRAAFEHAIEVHNYRDSHFVAPHVEL  
VESDDPFQVAKKICSILKNGTFAMVATTTASSYETLVSYSNTFQIPIVSPSPFYHTRLRPARYGISM  
RPDYLKAILDLIQHYRWKQIVYIYDSDAGLLKLQNLKLTDEYKLEIIVRRVTSASEANKFL  
VNYDNETRDQLKHVIDCEANLTREIIIKHVKHPVGRRTFHLLGGLIMDEFANNPAIEFGAVN  
ITGFRLVQNNRAYEEVFTEKSRHQWPDPKTKITSEAALMYDGTRVMLGAFKQLLNEYPAIFA

KNFRRGEVYNNNTRGIDCKREKVIPWEHGNEIFHRLRNIKGIRGLSGNISFDPYGLRSNYTVDI  
VEVTVNSELTTIAEWSQMGFVFAAPKYRRIFVDSGFKSNKTYIVTSILEEPLYMRRKMEPGVN  
LTGNSQFEGYCKDLADLIAEKLNFYELRLVKDGKYGGQSADSESGWNGMVGELIRNEADM  
AIAPLTITSARERVIDFTKPFMSLGISIMIKKPMKKKPGVFSFMNPLSREIWMCIIFAYVGVSVVL  
FLVSRFSPHEWRYEETFVGPVSNDFSLYNSLWFSLGAFMQQGCDICPRSVSGRIVGGVWWFF  
TLIISSYTANLAAFLTVERMVTTPINSADDLAKQTEVEYGTLESSTQDFFRKSIAVYARMWEF  
MHTRKNVFAATYEQGIQRVRESKGYAFLMESTKNDYINERRPCDTMKVGGNLDAGYGVG  
TPLGSSLRDQLNLAVLSFKENGDLARLQNKWYDRSECKTGDANKESTQNELTSLNAGCFY  
ILIGGLVLAVALLEFCYKSRLEATRSKTTMYNAMKAKVRMSITGTQNGTGPSGGGNVAGG  
VGVQGLAEDRIRKSLAEAALYGDSPSSPG

>Vd21106

MQLHWVLV GALGALAYS AHEVLAKEKLRIPIGTILLPNQEVYENILRYAVKNFDSSLFDTRLVA  
MRLSNADVFVQINMKVCAMMREGVLAFFVAPDSAPALREMLTSYSSHFHIPLATSLASRSFSRSE  
YAISTQVSLADATASLLRRYRWSQVAYIFDSSASPDILEAIQNSGVKISIAKKVNNEAEASDAVL  
ELSSLGRLKPEKIEKIVLNVNRPSLAKTVLSGMIREVKSFKNLNTQFILANPVSDDFWQYIRFRD  
AGSSLNVTAFLRVDSELPHVTRFHKQMMQLSSHRSLFHNQGTQSYLFLDAVTALLTGFDRLVK  
DNPRLDRNLRHHPGSVYFNGTKGLDCMDQSRFFEYGDILAAFIKQIKIPQGQSGPVEFHDNG  
ERVQPTITVIQGS HKGHVRLGTWTAKGLMLADKPEALPQIKAPGAIITPAKELSVGSVLNSPYL  
IQRQTDGEFSGFVPDFLEALS NVVPFAYKIQVVRQRDYGRRENGTWSGLMAEVINKKVEIAV  
SDMALTAERQEAVECTQPFVDDLA VVMGRTPAGRPSLSFFFVRVFSWQLWACVAAILAVFIIF  
SYILNHLAQSRQRNSSEKNRLLCLVWFTLASVFARSQGPVNSKAYRILLASWWLFLAVMTIT  
YLSACIALLQAVLFGSGPDLFNKDKFCRDAANGAVDVGYMRHGAVEKMIKNQAETQLSFYQAQ  
LLNNSRIRIVSGIAEGMRHVGPNYAFLGLKSQVDSYIGRDCGIKSYTLIPQFAQYALVMPKMS  
YRDMFNQIEKLRRESGLADLKEKWIDSLVRCPREVEVLEVPAPIRYTALCGMFIIVLAGFILAL  
LAGVIEFCWSAKRDSSKSEKPIQKVMWDKAHDSLKPFQTQKDPALGNDEEMTLNPSQANGTPK  
QVRVMV

>Vd21675

MRWIAFVLVLCCTTVLVQAGDLPVMKIGALLDEDEQVASGALMDTLVARINADHKILPRFRLHV  
VRVKVTNSFAAAKATCALIDDGCVALIGPTQHESHMAQEIAARLQVPPFARGRPGASVGMTG  
ASPAGGDNSGPPSSCSTCFDILLPPSRALSRAFADILKAKKWKNYALIYEKNQDLVELAELIKNK  
NILLYQYQRGERGTRKRLIREIGSDPQYNYIVQLPADRANDFFRLAGIVGLLSEYFSYFVTAQDFH  
TWQLPAEALS NITALQLLHQEFVSLPSDSNGKRQRGGPKQQQFIHQHQSQQQQFQQQQAAQ  
QQLQTPPAPLKYHTALLHDYIFVFAVARVGTLSRTQNMAPVSDASCHKPRNGWPMGLTIATQIKA  
TSMQGLFGNIQFDTFGARSNFSAFVTEHKHGTIVKVGTPWAPSSGFSMTRNVSWDRVHAEHSLR  
NRPLRVVTLSPPFVMWRQQQNSAKSERNGDLEGFCIDLLNELSRMLQLKFDIRLVNDSQHGS  
RDRQGNWNGLIKDILDMEADVALADLTVNVERARVVSFTTPFLPSQLELLYRPPSTAGDLVSLV  
KELFSPLSQEVWLSGVACVFMATFAMSYASKFSPRDRVRRSSSKQANIQTWTKPRFSFGDIFHL  
VACCALRQPPISKRPRGVATRFLTSVLCFTSFVFSVYTARLTAQFVQRRMHFDELHDAGDLLR  
VKGIRFGYVANTSSQLFLQGANYEPFSTIWSLIMGAGDISTLPSLEGLRLVQAGGYAMFTETPA  
AEYHQCSISDCSVLRLATGIETPGYALALPRGKACMKNTVP

>Vd21743

LNPNRPNVTYVMIVPSTRFESVRRKYRSTINEALNQIKNGKVPGNHLNKHYSLQFQLVYLSLA  
PTPREILDTLCTEILNASVLSVGYFTNSETFGSNAASVEYVHQLLGYLGIPVISWNPDNIALDER  
VTDAILGLSPVDHQVNSIFDFLDYQWTQFAIITQLAGHENFIRAIREKVFHKQHKYSLIAA

HTLPRGGDADKYFNLLQELADGEVRVIVLFCGTEDAREIFLASSRHGITGKNYAWIVTQAVIGS  
AERSPAEFPTGLIGMYNFTLPVLLDEMEKSMYIFASALERLVNHTTEENRNQLSTGLTCNASE  
YSYWRKGEEFYKYLKETEWTSKKFNSVAFNFDGTRKRVDLDILNLDARNVWEKIGDWGESG  
VDIKDIIWPGEERKPPKGVPEKFNLKVTFMEERPFVIVGLPDPETGECESSRAVKCRIAPESALIG  
LNDTMARRHPNYRCCMGFCIDLLEKFAQDLGFTYDLSKVEDGMWGVKDKNGKWNGLIAA  
LLNRHTDIVVTSIKINSDRQEAVDFTVPFLETGIAIVVAKRTGIISPKAFLEPFDTVSWLLLVGI  
QVAASFIFEFELSPDGYDMKIAPPRNYKFSLFRTYWLWVAVLFGAAVNVDCPRGYTARFMSNV  
WAMFAVVFLAIYTANLAAFMITREEYDLSGIEDSRLRYPHLMEPPFRFGTIPYGNTEQVLQRN  
KPTMYEYMRPYNRSNVNEGKAVKKGTLDAFIYDATVLDYFVGQDDECRLTLVGSWYAMTG  
YGFALPKSKYLQMFNRQMIERYEHGDLERLQRFWLQGACKPDKRKRNAGNPLDINQFMSA  
FLLGCGVLLTVLLILEHVYFRYCRKQLAKANFGSCFSLISLSMGKLSLFRDAVYSAQGMLLR  
RATENRFLQAAEHERLQADVARLARELDVLRQKIKTLESDLTTKAGSNGGSLDELRTGIDTT  
GSIPGSQRVARPQAPKRTPFGGPLAISGSHPNVADKIVGLRQASIHSNTSVGAESPTRSLARFTGS  
HEDLLRHRDLTRTKIHSNEPLVISQASILPAVPPHSVLFQQQQAMVKAHIMEKETVL

>Vd21758

MLITDDISMLSIRSILFLVVTLFAGCVEAGQPFSVNIGGIFASNSPLVRVDFAIRRAPESSRLPIV  
RDAFIGMKKVIPDIHSSFDASKAVCQLSRAPSIVVGPTVVPVSHILASTCRAFHVPFSLIGPLLS  
RTSAASPRKLPQMLNLHPPSDILGRAYFDVLMTEWRSLTIVYDREDAFLRLAPILRAAPSLTTL  
RPLDKSVSPGTLFKEVLRKSDTHIVLDVDTQLIPELLRSAKDVGLMTEYHNFVITSLDLHTLDL  
SPFFPSRANITFLQLDLKSKENLKMIRDFRRFQLMDGIRDNLNLTTEQALLIDSVSFVVRTLYE  
LSASSKLRSPPPFKCQSPRPWQTGDLVIKMLRSSFRGVTGIITLNRHGLRSRFQNVNMRIMWN  
GVAKIATWNQDSGIRTQASYPATFRKELENLMASKVFNVTTIVNPPYTMLKSDYRNRTGNDRF  
EGFCMELMETLANIGFRYSVHLVKDNSYGSRQPDGTFDGMIKELINMEADMAIVDLSITAER  
MQAVDFTQPFLKTGISILFRKPAQGGLTLFLFMKPFSDVWICMLTAFTGVTVLYLIASISPTEN  
RDLGEDDLSQRDPQLLDQEMKIMSRFWFTIGSIMQQGCDLNPVLSCRTIASIWWFFTLIVVSS  
YTASLAATLTAERLVSSIDSADDLARQSTIEYGCLASGSSRKFFEVLPLQDNHSLKTAVLFF

>Vd21835

MRLQAKNVEMHRPGFGFIVLLVLLGPALAAVKIGGIIAAGQPRTKELLEILKERSSGLPTKNR  
MHPDELAYVEPNATFGISNTACAQVGQGVSSIVSPCTGIVHATLQSLASRLAIPYINTAPDLVDTTF  
NTKQLGESEKSITIVMAPSTAKATADLIRKNQWKDIYFIYDKPEGLEELILSHLLEEDDEVQVK  
GIHQVTSNTSAMTYLQEKENAARDVEKHILAIQVMAKRRIIHSYSKRRAYYHFVPRFTVR  
HFWSEVRAFDQSTVATFQIVEETEFKTMKGMRAGVSTPKNSEDEHIHEEEALLMDAGRLLSDT  
MVALSGKQPLAAEDIFKELSQITAAVTCYRSPLEEYPPQGQTIADV MRKIHFKGSTGQVRFNDHG  
RRTGYTLDVLELTSADMERVGVKWEQGLAFSNEHERNSKRARIKQELSKSIIISTIIERPFLFF  
KNTNETNPHIDNVDGYIKDLIVRLMKDIPGRPQFNIHFVKDGKFGYKDSQQASGWNGFIGEILR  
KDAHMAIAPLMITSESKVVHFSQPFMATAIGAVARNDADDLLNIRTPFTFLRPLDWKIWLLFL  
GAYGTVAIVLLLINLINLAVATPPVDPPTPCRHFYNSLWYAFGMFMSEECNCRPKSLGSRVIAC  
SWWFFILCVLSIYTAQLWINDPFAPTGEKLPRLKELLYQDRIEYGLIRGSATEDFFQNTDDSEY  
KAMYRRILSFNDSVIESYPKAIDRVNRNSKFIVFADSNFIRYTSAHTPCDTIQVGTDLRRGQYAV  
AMSKHFALSCKIDDISSLRDEGLAELEDRWFGAHALDCPADNLVIAPSLAYGGEKPLDIMKP  
LEVRRVLGWFIVLGLGLIIFITICEVYCKPKKQRTPEEIVERQTAREAKSRKSGKKDKAAE  
VETQQLTAHEAPIGNSQMDDATRMGVGIANAADDATLKKGGCLPREMKIDEEYLDGDDGGFR  
RSELPPIADVEPFTDTSRDAIQSPVSGQSTIKMHSGNTTEAVNAGLIGIKPSSQSPPTLILKSPQQ  
PCQPIQPILTQSQPKMPITTIQPTFQTQPLTTKSTIPQMSKAPQVAQMGRSMSQPVASLPLLSQR

VPPVQLPPTMAPIKNTAPAQATPTSAPRTSPAPAGPPIPKSTLPSMSPVGPMSPLSPASPASP  
NALPPLSGLSKLGGDPPPAVVNQPLSRMELEGQPELKSIDRSPADTPGTPHDDLERIDPILGN  
LGSLAGLPPPPANIRSTIQNQDSIGYESSEV

>Vd22269

MSGVVAPVLALALLGVAVADIKIGGLFETGEDIVEMAFNSAVERINSHGLAEPGERYTPTSDRLL  
TRVEHIERADSFQASRKVCTLLEEGVAAVFGPQSTDASFVRSACETLDVPHIETHWDYRSRTT  
NHSLNLYPHPSALGKAYLDFIKYKDWKNFAILYEENDALVRLQEILKDATLMKENRVTVRQFEI  
GTEYRKTLKDIGKTGIKNIVLDVPIRSLYTVLKHAQQVDMSEYHNYFITSLEDAHTIDTDFQY  
GGTNISAFRLIDFSSKEIDEVARDWIQRHRFSSKSSSVQSNFNTGAQDFYKNLTTKVALMYD  
AVRLFATALKDLHPDSGPKIQVAPLSCEREHKWSQGNFVKYMRMINIKGLTGNIRFNKDGHR  
TDMRLTVLDMAHSGWREAGEWTMHGGISITANYTRELEEARLSLLNKTLVVTILQPPYVMY  
KENWRDNGLTGNDKYEGYCIDLLDAIASSEHFDNNMKYVIREVADNSYGRKADGRWNGMI  
GELLSGKADLAVADLTITFVREEAVDFTMPFMTLGISILYKKTAKPPPGLFSFLDPLSLEWYIM  
MTAFLGVSLFLFVLARFSPYEWVNPHPCEGNPEELDNQFTIWN TLWFTIGCLMQGCDVTPRA  
LSTRVAAGMWWFFTLIMVSSYTANLAAFLTVERLVSPIESVEDLAKQTTIQYGCLRSGSTQSFF  
KDSQFPYAKMWHVMQSQRPTVFAESNQGIDRVLRGKYAYLMESTSIEYNIERNCDLTQIGS  
LLDNKGYGIATPPGSPYRTMLSQAILRLQENGLHVLKERWWKKKRISKKCPKDIINKGTSAM  
TVASVGGVFIVLLVGSCVAIISAIVEFVWRAKKIVPEERDPVCVELCRELKFTLTGSKKTPDTPS  
LG

>Vd22292

MHNIMTVVQKALKALEQIEAMRRRVKTSVHYPTIFECRSGRAGANLLLSLLVPGVFASSVPT  
VTADLHNSNGNSASVLDPEIISKAVLDADLSVNAINLAAEELPRVYNVGAVLSHPEGIAYFEEAIL  
DAMATYNIDLVAKSVHMSLNPIRMAENVCEQLISQQVYAVVISSPLKGELSPAASVSYTCGFYSIP  
VIGISSRHSSLSKKNLHRTFLRTVPPYSHQADVWMKLLRHLGYQSVVVFHSSDNDGRATLGRF  
HSVAAQHKNVAHIEHVIEFESGVSETDLTAALRNASRRHCRVYVLYADTSEASKVFDVVKLD  
MTTSGYVWIVSEQALKAPNCPDGVGLLELVNAVDERAHIRDSVNLIALALKKLQKDSKVAAP  
QLNCSNLEHNWDAGLKLVSILKEQVLESGENGHVKFDQRGDRLNSDYDIFNIQRDKESYLVK  
VGEYMYSEYDMEMELKINLNAVSWPGKATEKPLGFVIPKHLRVATLAERPFWSRKVNSSTEC  
SSVEILCPWYNRTADTGHDEAFCCSGYCMDLLHFLASKLNFTFDLYLVEDGQYGNLDSNVEG  
KRVWTGLIGDLVRKKADMVVAPLTITPERSMEVDFTKPFKYQGITILAKKQDKSSTLASFLQPF  
QKSLWILVVVSVHVVALGLYLLDRFSPFGNYRVLPSERDEDGLNLSSALWFAWGVLNSGMAE  
GTPRSFSGRVLGMVWAGFAMIVVASYTANLAAFLVLEKPESSLAGINDPRLRNPSNFYATVR  
GSAVDTYFKRQVELQNMYRIMEGKNFDTVDHGIHALMNGNIDAFIWDSSRLEYEAARHCELL  
TAGEQFGRSGYGVALQRNSFWVDKVTLALLEMHESGFMEQLDSLWIHNGGRRCESKLERTPA  
TLGLTNMAGVFILVGAGIFGGLVLIIEINYKRYLAKQKRRMQIARKAAAKWRGIVERRRSLRR  
PSHHRIMLPSNIQQLPVLIGSLASGMPSAQTVVPAHSGASKHENLGHQGLSRLKSASTSIKSSHE  
TRSDLADLPPPPPPARVQATPGTRMNASTRYLLGAQENKPVSFINV

>Vd370

MGYRSGSRHLAGVTTL SVLFLCGWMNTTGAVPARVHKDVG TIGIIVEDQDLAKHFLYIASKLV  
DSNLKAVSKVIQND DILEAIQSMCALMESDVNVVFGPTSPVSSLHVSSMARHFDLPHIEFRWDP  
SLIDDEHSLNLFDPVQIAEAQTALMEYWKWRDIALIYESDDDIEMRRLQLQEQEDGITVNYF  
KKDKGETFRTLLRQIKERDIRNVVDLEQKAEREKDKGKIESFLKQAMQVAMLNENYNYFF  
LSLDFHVAKLNDFMHSRANITALRLVDMKHHIADDLLRGQDSPQDNKKGSASGRHNQKAA  
MARARRDRNDRLLKRDEHNGEADEEEEADEDASFPFLETEVALIYDAIMLFKLGVKDLVN

KKSSYTKALPTAKCNGRKS L DSEHLGTELT KTMLRRTFEGATGRVNFNEKGIREDFVLFVTELG  
TDGLEEIGIWSKSSGLNITNDENEFELSKEEKT KIDDIHLRIVTVMIPPWIMKDEKLSTEDRPRYK  
GFLIDLLEDMMKRSRPLDYELYTSPDGSYGVETRYENGTITWNGMIGELVKEKANVAIADLIV  
SDERLRAVDFTLPMFTAQLVAVVKAPVPRKPGGVWSSFFLPLTREVWMYTVVAGLLTALIMYMC  
ARFCLSEYVNTGDGVNGPAEEVDNQLGIVSCLLFVFTLLHQRMHLDPNATATRVLAGFWYFF  
TFVILAIIVGNLCESVLYEDEDFSKLETIQGLLRIRGMKFTCIEHGATCRTLMTSHAPVLWEINKR  
MFKDETPKVKNMTHALAKISQDEHLAFIMEYASAKYLVASSCDLVMTKPFANHASYGIALNK  
KNPGKTNRLSEIVLNLQAKGILQEREERWWKTKRFCDVDNDGDFDDVDDGDDDSINEQKVE  
LRTLSPGDLSGAFILLFLGLCFALLINIGEVIHEHLTREKRDTYFNMITVVDHIRFAFKMQTNQV  
DLSETSLPRNHWDQLQKRRENRTRENGQKSNDPTSPRKTDLSLSSKIPQYQ

>Vd52944

MTWLCAVLASVTVVSISFSTGVHGGTYKIAGVFS AETGQVESKVFARAVDRVNTDNREFPEVQ  
MQAIPIMLKEGQTWENYQELCRQFESGVVAIVGAESSVEDSLISSVSSAVRIPHIRTGFNRELED  
PDDL SLGLAPSPDLAEVVRELILHMGWNHIVYIYDTSTGLLRMNELEEDPEFKGRRLVPIDLS  
VDANPWDNIIKLSIRHVVDIESKSVHQVLKEISMSGLSQDYYSFIMPNSDIRLPENSTQRTFFID  
ADVYTFSLVDPDNREMHWIYRMLEMNSSENEPNLPIFYDSVLQIGHTLNNLTKLQRPISSPGN  
CTLKVAFKDGRKLYDSIRESTKFEGVTGFVEFDDKGARKVKHVHVKLLKDGLTKVADWRPL  
DGLTFIKELDPKGEPDEALEHDEGLNNRALVVTILLPPFLMRDDSPHLKGNERYSGFIVDLLE  
KLARLLKFQYLIKEVEDGAYGTYNATTNSYNGMIGEILLGKADIAVAPFTINAERYQILDFSFPF  
LEAGLGLLARREVDPLEHNFLSPFS AIMWFSLFGTMMFATFVITFIARLSPREWSSVTDTVIETH  
FTVGNCFWYLYSTLMFQRQFHRPNSLGVIVAFFAWFIFCLAIMVSYGTVLGDFFIIKYNERPASK  
IDDLRSENNRVKFS AIKTGSTMRFFEETEYPNYKQLYAKLDKDAAVRNLSEAIQRVKNEDFALF  
LETPYIEYFVGHDCSLQQVEGTVGSVSYGIAMSQSSSLQKYL SAGVLSLRREGSLQSMRAKW  
WNEQHAGRHC PDHLHIVRPTPFTVRFGRVNMLFVLLGGIILSVAITIYNYVRKQMTIEDKNEF  
RYFLPTLIREVETLFRKRPVPTNPSPEPTAA

>Vd17150 (25a, MF069507.1)

MEILLRVVYELLVTLYFVENGLGQTLNIAVIVEKKFELARQAVEAGLQRAKNDGKTIHWQFVV  
MDADDELKDLCDIIMENQPSLVINTVRTPGSNYKLTKEIKQTVRNLAIPTLDLSYGSTDEYQM  
SGWNGKKPEENDYLIHVTPPGDSYTQAVRELSIKMDLATA GILYDKSVIIDHKYARLLENVPTR  
HIMRQVSESSADFNKTKVIQSTDVSNYFVVG TISHLSNALHSAQENDWKPRHHCWVLITKQE  
GEPVCEDCMNHEVLVHPADKEGKRIGIDGAYGSEKLDGLFYEEITYYMITRIFADNKYSKQPI  
RASCREKPATRDDYNLLNALESSKLSTRYGDYFTDAGNKPGYQAINMKVAHFNYTASKTRQD  
NEKGFYVYGGDAKAAMWTKADQTALEQFGSVTFYKVVTLIQPPFVYKNGSGPEFYGYCIDL  
IDEIKKILKFEYNIYAVEDKHFGSKDKETGLWNGLIGELVKKKAEIALGPIAVMAERETVVDFTV  
PYYDLVGLSILMKKPEIKPSLFKFLTVLETNVWGCILAAFFTSFLMFVFDRLSPYSYRNNEK  
YKDDDEKREFTLKECLWFCMTSLTPQGGGEAPRNL SGRLVAATWWLFGFIIIASYTANLAAFLT  
VSRLESPIESLDDLSKQYKVKYAPQGQTTASTYFHRMANIEEKFYEIWKNMSLDDTLTDDQRA  
ELAVWDYPVSDKYTKIWWTMQEASLPLTFEEGVARVKNSQGS DGF AFIADATQIKYATMTNCD  
LTQIGSEFSRKPLALAVQQNSPLRDQLSSAILKLLNQRKLES LKEAWWNGNPEKKNCDDEGKN  
NDGISIKNIGGVFIVIFIGVVMACITLVFEYF WYKKNKPRSKVVS VKDHMPQKK

>Vd18850

MAVKSMEYQINRVTTVHHRYEANIPADQQWGVIFPNGSATGMIGMLTRNESDWAANAFGQTL  
DRHRVVTLSSEFMVQDLSILAGRTFGFQDNYFGLFGAFESNVWTCLLMATLVMPVILVLSRLL  
RNEGNVNRTLFSRMLVLYGRNLSVVRTILFESIEDRDL PKGNSGRILIGLWLTSIYLTMSIFQGT

MKASLLISSGSSRIDSMRDLVVRKQVVPPIWRGTAYHKLFRADMDIYQTVYSRAMEKNGILP  
GNQLYTNENFMNVLQGRAVIINEQSSIMYNLGRSCDALRGHPGEFYFAKEPVYTHGLSMSLRK  
TLHPMLKRVINKTIRELQETGNIRKWLNIAMADFFTCEIVNGAPTQEEPTVYTLGLSKLKGPLII  
YGMGAVATLITLCAELAWESKCFCFIWQNGKLI

>Vd19098

MTEVTSREGRVNVNGLTVLLELKLARKLNFTYTFIMPPEPVPGLKQSDGRWSGLIGLLVRQEI  
DLALYDFTPTDRQQAVNFTVAFDESPYKFLVPKPQPNYKYLFLDPFTWDTWLAVLGTVLIIGPI  
LWCVHINSKFYDYDMRDGKGLFLANCEWYCFGAIQGGIHLPAISGRILVGFWWLFVIV  
TLTTYSGNLVADLTFPKIRNPYDTVSSLLNSDITWGAFKGHAVIEILKQQGLLTQLSAKLAHI  
ETAHESWALKEVADGKMALIGSEVTLFHYIGKQFIATNLCQYAVAKKEIIRQVKVLAVRPGFPFL  
ARFNTLLTRIVETGLIIRWKKKYWPKENECTVDSKPQAGDIRRITIAHMEGSFWILGVGFLVSFT  
LLALEIFRKRRELDPNGGRPQRIGPRDFKDNLFRKTNYSKDKHYNTDYGAQVGGAGPGAGK  
GGQSGYGFEPSNTPFRGYSGFPNRTDLIPYN  
YPARRY

>Vd22240

TDDFWQSIRFRDAGSSLNVTAFRLVDSSELPVMMRFHKKMMQNPNYRDSFKNQGTESYLFLDA  
VTALLTNYDRALQDKPTLLEAYLPQEDGSKGTVGFNCMDQSRFFEHGKDLASLLKQIKLPEGQ  
TGTVEFLADGSRLQPTIAVIHSSHVGHVKLGSWSPKKGLMLTDKPEALPQIKAPGAITPNKEISV  
GGILSPPYLMLKRGSDADFTGLIPELLEALANVMPFSYKIHAVPRGQAGARTDNNASWTGLISE  
VINKKVEIAIADIPLTADRQQHVEYTQPFLMDDLSSVSRKSQAGRPSLSICFITIFSWQLWLCIL  
GVFFTFVLLAYLLNRLVSPQEEADSFGRTLWLSAGSFLCRSPGPEGRCRASRLLLFWWFFLAM  
VTVLYVSAFVAIVQTVVFGYGPDVFTMRKFVQDAASGTVDIGYVRDVVPGKVLK

>Isc000549

MAHSFFNKTLDDFVESVLFWYPYDPHAASFETPQGKIKVTTGLLGDIIRELSHSMKFNETPQGI  
KVTGLLGDIIRELSNSMKFNYSFTPERTLGIRHPNGSWTGLIGSLQRDEGDFALGLMIPTNS  
RNAIARPTTEVYIDEITIFAGRTHSKSMNVFSYVWVCVVIAMFTLAFLSTGFDYFYEHTVRNRK  
SFSEFFTHLWEYFENLLGKGSSVESDWHATRLLSGFWWIGVTVLVFAFAGQMRACL MVKSQ  
EAMIRNVDDLARRSNVKPYTLSGSILTILRNSKKPSYTKVFQRIVKGRGQTELHQIYGPKILKE  
VVQGKSVVIADRGSTYKVARTCRNYTDGEFYIAEPILNFRFVMYLSATMDPRTQWEINRRL  
VWLRENGIVGKWIKMLGDWEHCRQESSRVTLSFEDTYAIFVMWALLIAASLVAFGCEKLHHA  
CAAAKERPSQRPGPILGWGVTTVSRKRPKVAKPFQAYNFKV

>Isc005598

ILRRLCEDLLPDDVVAVLYLTNSAVFGSNAASVQYVLQLLGYLGVPVIAWNADNIGLDQRVSQ  
ARVLQLAPSVVHQVAIFAILERYAWYQFAVTTQLGGHEDFVRAKNEHIYSFVLDVYTLRG  
HTRQEFRSQLEPVATGEARVLLLFASKEDSREVFAAVGQLGMTSKNYVWIVTQSVIGAHPLAP  
QEYPAGLLGIHYNTSLAKLHDEIERAVLVLGHGLELFVNEPANANLSLNPGLRCYEVGRAHWS  
QGDHFFRYLRNVSIEAKGSPNIEFLPDGTLKYVELDIVNLNKDGYWDRIGGWTQKGIDIKDIV  
WPGNELVPPRGVPEKFNKVTMEERPFLNIGQPDNETGECESGRAVKCRVPEAMLQGINDT  
AARKNSTYYKCCLGFCIDLLQKFAQDLGFTYDIHRVEDGTWGVKDNGTWNGLIAELLDKKAD  
IVVTSIKINSRQMAVDFTVPFLETGIAIVVAKRTGIISPKAFLEPFDTVSWLLILLSIQAFAFSIF  
VFEWMSPSGYDMRITPPREISLFAEHRFSLFRTYWLWVAILFGAAVNVDPRGYTARFMSNVW  
AMFAVVFLAIYTANLAAFMITREEYYNLAGIEDNRLQNPQQTDPFRFGTIPRGNTEAVLKQNK  
PQLYAYMRPFNRSTVTEGIRDVKRGELDAFVYDATVLDYLVGQDDECRLLTVGSWYAMTGYG  
FALPKKSKYLAMFNRQMVEYRERGDLERLQRFWLQGACKPKPKRNASNPLDVNQFMSAFL

LLGCGVLLTLLLLFLEHIYFRYLRRPWLRPKITLVTHPRHHHAQSMGKSLSFREAVYEARMRR  
RCRDPACDNQLWKVRHQLDIARLRVSQLE

>Isc007957 (XP\_029841705.1 ionotropic receptor 93a [Ixodes scapularis])  
MNNKNMMTFHREFVSVVTQPIDDDFQKLVVGFDPGANVLAAYPEIADNDPCVPEPGCQLPLAM  
ETVAKTIGDKLEKGTyrTTEFFTTKfIFSNTSKSLLLASGKCGQCARFIIRSVAKVQGIQEFLKIG  
EWTPAVGLKMT HKQFFPGIMGNLGGIRLTIGVINDPPMSVEMSPDRKTVKNVTGT MADMVE  
ALAKGLNFTYT WKVPKEEIPGSKENGNWNLIGMLATGEADLGAYGFSVTKERSEVVNFTSA  
YDESPYKILVPKPRANYKYFLDPFTWDTWVAVLVSLVLIGPILWGIHCASPFYDYHGLRDNKG  
LFL LQNC EWYCFGAI IQGGIHLPEAISGRILVGFWWLFVIVTLTTSYGNLVADLTFPKIRNPVDS  
VENLVAHRGYMRWGAFKQGQAVFELLKSQEQGPLKVLSDRMNVFEPNHEM WVLDQVRLGYM  
ALIGSEVNMFH YL GRELNRTGECDFAVARGEVIRDVKS LAVAPNFAFLERLNNEPDHDGRPPR  
RLKRLVESGLVMRWKKKYWPQDNECTVESKPQAGDIRKITLRHMTGSFWVLGVGFFSSFAAL  
FVEFVRRKREL TAPPTHK PPTVIHTKSPFFTRTEYS GKDTLT TDRFATDYGGRGPRDNAGFAFSP  
PNSPFRYNGYPNNRSDLIPYNYPARS

>Isc008225 (IR25a)  
MQPPFIVRKNASNGENQFEGYCIDLINAIKEILKFEYVITEVKDKMFGSIDKNTKQWNGMIREL  
VDKNADIALGPISVMAERETVVDFTVPYYDLVGISILMKKPEVNFLMYLFDRLSPYSYRNKE  
KYKDDEEK RDFNLKECLWFCMTSLTPQGGGEAPRNLSGRLVAATWWLFGFIIIASYTANLAAFL  
TVSRLDSPIESLDDLAKQYKIKYAPQKDTSSMTYFERMAYIEEK FYE

>Isc008266  
MGTPEVLCLLLLGC LA AHADIKIGGIFETGDDVLEMAFSSAVDRVNTMGLAEPGTQFVAAGSR  
LLARVEHIERLDSFQASRKVCSLLEGVAAVFGPQSGEASAAVRSACDVLDVPHIETHWDYRA  
RPDNH SVNLFPHPAALGKAYLDFIKHKDWRTFAILYEENDALIRLQEILKDPLMRERKV VVRQF  
ESGVEYRKILKDVGKSGIKNIVLDVPTERIHTALKHAQQVDMMSEYHNYFITSLDAHTVDMED  
FQYGGT NISGFRLVDVNAKEFDEVARDWLTRRLRFSKKGEKEENFYRTKVALMYDAVRLFATA  
LRDLQP DN GPKIQRVPLSCETE EPWAQGN SFVKYMRMINVQGLTGNIRFPNGHRTDMRLAIL  
EITHNGLREAG EWTMHGGINITTNSRQLEEARLHLMNKTLIVTTLVQAPYTMLKENHAELEG  
NAKYEGYCIDLLEEISKL PDISLKYKIREVADKAHGRRDDKNEWNGMIGELLHGKADLAIADL  
TITYVREEVVDFTMPFMNLGISILYRKADKKPPWLF SFLAPLSLEVWIYMSTAF LGVSLFLFVVA  
RFSPYEWVNP HPCDPNPT ELENRFTIWN TLWFTIGCLMQGCDVTPRALSTRVAAGMWWFFT  
LIMVSSY TANLAAFLTVERLVSPIESVEDLAKQTTIQYGSLSQSGSTQSFKESEFPTYKKMWHV  
MQAARPSVF TESNQKGI ERVRRGKYAYLMESTSIEYAIERNCDLTQIGSLLDNKGYGIATPPGSP  
YRTMLSQAILQLQESGTLHVLKERWWK RHIVKCKPKEEASASKGTSALGLANVGGVFVLL  
TGSCIA CITAIFEFIWRSRKAVPEERE PVCMELCRELKF TLTCGGK KPQNKSEDRQPPGENGLP  
FMPLTGYN AVVSKDTFS

>Isc009282  
MAPGSRPRMRASGRRSAPQWARSHRSHGAFRAAPRPVAGAMARLAPPVLVAVLLLVPVLLV  
AVDSTPALLAALPPRSAPQLARALRRALARWGAGPGDASATSWVVAAFSAVPDTRAALSALCT  
ALEGHAPLLVMPVLA YTG GYLDRAAQEASPLYLSLDPGLPELTEALFGLLSQNRWYHFVLT  
DESAASSMLAQLGSLCHGV PWRPMLRLALPGPTQPLLGPLAKITASQARIVLLFVEAPMVRA  
VLDAARTLGLLAGDHLWLFVERDDPNPASP HPCGGDVEGSALKGCPLGALS LQLRQSHVERT  
DAPRLLAGLLHDGLSRWGPIEYPLALRNASGAPTSCWEEPSARREMFSQRLHGYLRAAAAD  
AVQSQRFP PPVFDILNLVPAEGGAQWRSVGNVTKGSAVLDAVLWPSTGEPTLMGPRPFGQPRFR  
VVTAYAAPFVMAATR LRNGSCLTGVPCLQVST AISDELAALFAHYHRTGGHTRHPGYNVTTCCA



GIAIDLLKSLARDLSFDFDLYLVDGSGFTDRGGRWGGITADLISGAAHVAATAYSVTSSRRRV  
DFSVPFFHSGVSCLAYAVKRDPVLSAFLVPFSVPLWLAIFLSLKVTALAAALYEWFSPPGLNPW  
GRQRTRNFSLASALWVMWSLLFSLVAFKAPKSWPNKVLINLWGCFSVIFLASYTANIAAHFA  
GLFFQMQRVHDFHDTSPVEGYVFAENKRLWEHIQRFGVASLEQGLESRLGLTDLVIGDTAVLN  
YYRANEPSCRLRLGDSIFDDAYAVGMARGFPLTAAVSELILRYNAVGYLDQLHGKWKYGRAHC  
LQDGLLQRLDKPMPLGVRVAVAGLFIMLLVGLLAGSLVLILEHLVFRYALPGLRARSKQCFWKSP  
NLMFFSQKLYRFINTVELVSPHHSMAKEIVSNLREGQIASLQKSVKRKIKEEARRRKSQSFEM  
IQEIRRVRRQQQTERDEESPTSPHEGPFSAATSSIGPLLREPSPPSGSSSSSAPTSSWVHGALLSVS  
LEELPSVAPPACRRRRSHSLGDLSHMRPAWQPRRAPPSCASDLDDVRLRALSREQLLHRWRDS  
ERRLLNLLREALREKQALERKLAFLHSALRNKPP

>Isc010976

GASFSFRLLKKQKLLRGETGRVRFDDRGRDLSDYDILNVVRGNHAPVGGYWSMSMELDL  
ELDRVVWPGNRTETPLGYVIPKHLKVATIAERPFVWVRPVPDESCLPSEIFCPWTNSSDGIAYP  
FCCEGYCMDLLQSLSQKLNFTYTLYQVQDQGYGTDFVNGSTHKRWSGMVGDVLRGVADMI  
APLTITPERSMEIEFTKPFKYQGITILAKKANKSSTLASFLQPFQKTLWILVMVSVHVVALALYLL  
DRFSPFGRYKLPNSDATEEDALNLSSAIWFAWGVLLNSGIAEGTPRSFSGRVLGMVWAGFAMI  
VVASYTANLAAFLVLEKPESSLSGINDPRVGGVFSEYFTRVSSPGDETTRGRPQREMALASATRI  
LPHTKTFSSGGAPNIVNDLQLDAFIWSSRLEFEAAQHCELV TAGEQFGRSGYGIGLQRNSFW  
DKVTLTLEMHESESPLSVSFIILSSRQGEDTVLPRAWLGPFSAGVFILVAGIVGGIGLIVIEIV  
YKHKQTRKQRRLELARHAADKWRGAVEVSQHTPTLFPTRHRGVQLVAPSAPLTLGLPQN  
GANIHQGLNSHWNDGHRSLHKK

>Isc012402

GGIFESGSQKAQLSFRYAIDQINKDISILPRTELMPIIHEVKQKDSFTASKALCTFFKQRVSAIIGPT  
SEAVTSFTKSACTNLNPHLQTSWEPKSNRNPYTLNLPDPEVFGKAYLDLIINKKWSFTVLY  
EHQDSLILLKDVINSSLAQNHSVSLVQVNPKLSFKKMLKDIFYQKQFNILDVKTESPLFRQA  
MEVNMMTYHYNYIITSLDLHTLDLREFVGLQANITAFRLVDPSPREVMNVLRDIKIGSALWRY  
GADNHTSPAHDITDALTDFDAVALLANGLHNADRVLQTLDLQSLNCEHPKPWRHGSSLLDAM  
KMITIRGLTGDVRLKGVREEFTLDVLELKARGLKQVATWHPRTGLSYFANYTLSEKFTDEL  
EGFTLKVTTVETKPYTMVYPDSENKTGNDRFYGYAIDLIAMLAKEIGFKHEFYLTEDGKYGSP  
QPNKEWNGMIKELLDRKADAAIVDLTITYERESAVDFTIPFMNTGISILFKKAEKSDPSLFSFLYP  
FSVDVWLYMLTAYLGVSLLMFIMGRFTPYEWSVPHPCVPEEGDLQNQFNLPNSFWFTTGAIM  
QQGSEIPIAISTRIASSMWWFFSLIMISSYTANLAAFLTAQRMTAPIENANDLAKQTKIVYGCK  
EEGSTCLFFKNSDDPLMKRMWTTMLAARPKAFADSNEKAVERVKKGNYAFLMESSSIEYVVE  
RDCNLTQIGLLDSKGYGIATPPGDNL

>Isc1653

CW012407-PA conserved hypothetical protein|protein\_

coding|DS907449:516555:547561:-1|gene:ISCW012407 ,>EEC16531.1 conserved hypothetical protein  
[Ixodes scapularis]

MGHPPYVIKSSGRFIGVAAVNGTSELRLTGFAIELLDILARALGFDYNNRVSGEDYGSLSPNGT  
WTGLVRQVYEREADLGVGDISITRERLEYVDFTAPFMQNGIGILYRNVDQRQFEEIPHFLRPWTS  
ELWLYVLTAVLATSLFSLSRLSSAEWVCKRRAGPSCRKLAGKEHLKRNFTLINSFWFVLASL  
LQQGTDMFPYELQLLFFVELAKLT

>Isc015703

MNSSVPLPHLIVAFPDSPPFMTPKYRNGKLYLDGIFGHILQAVAQFVPSYELVYDRKRTYGVRLP  
NGTFNGIMGLLQSGEADLAAAPLIVRQDRAEAINFTPIYITTYLSLLAVAGEPTANAFSYILAFD

WQVWAILFVSIPILSALLAAIETRARNKHKYLREFHDNFWDLLRTISYEGLDAAIRTPGRML  
MATWWLTVLVLTNAFAGHMKACMSIKTEPPRFSSIDDVVLHPKIRPMIWKDTGYEFYIRTSEKE  
SLRMLSRMAQKHGGFVPLSEMQSPAAVAQVYSGRAVYVNDRDSMLYLLSKQCGRGTGSLYVAP  
ELIFARFCAMAYSRKLAHHISRRIDLGVQAVIDSGLATKQWYADGLVEWERCMMQEENAGGE  
MSYKPLLQDLSAVFILWGLSVSFALMAFVLESALAFWMERR

>Isc016542

LLKLQQIFHMTSNKKLDVRVRRFMNVSDANAFLHEMELDDRESRKYVVLDSAEVAKEIINI  
HVRDLYTGRRNFHLLTSLYFNNQILELGVINVTGFRMLQSNRDEFKIFHKSWEKLDHASKWPG  
AGTAYVSADVLMHDATKVILDAYSRLLNKSDIFRNNFRGEVYNRGKIDCQSWPAVTWE  
HGKVIADYMKQTQIKGLTGNISFDSQGYRVNFSIDVEMTINSEMVKIADWTDTRGLSSHPPK  
YKRVKQDNEFENKTYIVTSILEEPLYMFKKPEPGQVLVGNQFEGCKDLADLVAEHIRITYVLK  
LVNDSKYGGRDVNSPAGWNGMVGELIRQEADMAIAPLTITSARERVIDFTKPFMSLGISIMIKK  
PMKMKPGVFSFMNPLSREIWMCIIFAYVGVSVLFLVSRFSPHEWRYEETFVGPSVSNDFSLYN  
SLWFSLGAFMQGCDICPRSVAGRIVGSVWWFFTLIISSYTANLAAFLTVERMVTPINSADDLA  
KQTEVEYGTLSFSSTQEFFRRSKIAVYARMWEFMNRKHVFTSTYEEGIRRVRESKGYAFLM  
ESTKNDYINERHPCDTMKVGRNLDAKGYGVATPLGSNLRDRLNLAVLSMKENGDLARLENK  
WWYDRSECRSGDSKESTQNELTSLNAGCFYILIGGLVLAMVVALLEFCYKSRMEAARSKMT  
YEAMKAKVRMSITGTQNGDRGRVRQGS

>Isc017534

MGVEMNGGSSGLMVSFSARMIGLVVCFVALSWHGCQAVRVGVLLRRGHNDVWREYEDAMT  
NFNNSDVASRLGIDIKTHRATFDDNLFITAQELCKQLNAGVTTVLLPSRFGSDAALYSLFGSTNV  
PRITTTVQQRCSKDPVQLQEDVWNETTTWTPSSTSTLPPWFSGDSTTERTPDDEEDPTTLGVT  
MMPDLAPAVIDLADVWGFKSLVFVYDSHALVTLQQFMDSGRVRVQQARRVSRSAEAHSMLS  
SLEKGDQQGRKLVLDCAVDLAKDIVIRHVRDVYMGRRNYHYVLVKPIVSERYLEGVSEFAA  
LNITAFRFQNTGEGITQAYNYNYRTTLIINAYRTLKEDPPPKNADLFEDRVSSGYSGGTSCGRVAY  
LTKDQGVVDDAYLKNVFDGKTGRVAFDSEGCRVNFTVDVMQVNGKNQWIQTGTWSKSSGF  
VRSGERNDSVPPGHKDYVYRVTTILEDPYLMVKNKKYETDGTNQTIEGFCKDLIDAISRLTGI  
KYQLHLVKDDHYGSVSDGWNGMIGEIVSNDADIALAGLTITSARKNVVDFTHPFLTSGIAALI  
KKPSKLQKGVGVNTFLAPFELHLWIGLGASLGAVLLFLFIFGAAMKNDHCCYQAGDEDVSK  
DAVLKTVCESLEMVAPLPTGSFMARSISGRIVSSFWWMFVVLVVFSTYTTTLTPLLTRDAEYSSI  
STLEELSMQNKVKFGTLRTGGVQEYFEESQYRTNKLIWEAMKTERHVLVGRTRQEGVGRVRSS  
DGKYVFFTESLFADYVNGRRPCDTKVIGEVFATQYFGLAVTPGSPLREKLNEAIVNMTESGEID  
EMKAKWWASECDAPPDPEMRLELFLHIIFYLACLLIVGIAVALLELLVRGCNKWRFSRLRAVS  
ARIDRERALARSRQGDVTGVFPSCPAGVSDR

>Isc017535

LGVILKPDNLIVQSVYEGVMYNYNSNSVAQEIKFKVKTSFATLEDTDLFSTSRTLCEQLRGNVT  
TVVLSSTLHSSLALQSLFKNTNPVYVATSQYEHCSVNVGGNLNLPSADSLGVSLLPDYLPVAE  
VVDHLAWDTFVYVYDSDNGPSKLQRLLSHQFKNSVSMRYAKRISNSSDANDFLRLETTDRES  
RKYVLLDCRFETAKRIIDHVRDIYMGRRNYHFLVNPVVELTYEKVPEFVAVNITGLRLVGE  
DLSQQSSLDPSQEPREKKITEEDERRAGPQPRPRLEAEAEELLEEGDQLLQADSPSTTTTCGDRPSV  
PQELGEIITRNREVRPKDTEVDVCSNCFVLLVPSIVLQTLFCFYVLLQRSFQGLTGSIRFTSDGC  
RIDYNVHVQNLVNNIAIKIAEWSDTKGFEPVIKPARVEVNDTGVLDKDKTYVIQSVLKPSSW  
QRVPDAQDRMGNDRYDGYCKDLIDALARELDIKYELRAAEETVYGRRDHKVRGGWTGLIGE  
VLRKASQNAQSPSTATVINAERKEAVDFSQPFMTTGIAALMLKPSDLPGRGMFTFLAPFSLELW

IFFVSSFGLVFMFFVSFFTTRVSSTKPGMEHSACGTIYKSLCYSLEAFTPHYIDSYYARPYEVL  
RSTGSYRRRYPIFPTLSRSISGRVIGNIWWLFIVVFSAYTASMVPFLSKESRIRPIRSVEDLPLQS  
QVDYGFSRQSMACKYFENPNLNSTAHRRMWEVMNSKPDVFKNSNAEGVDAVRSSKGNVYFF  
MEANAVFVNTQRPCDTMQLGGTFGVRSFAVAVPKGSSLRKHLDEAIAHLSETGELDCLKKKW  
WTQKSYCQYPERKKDETVMPLDNFVFFILGGGVALGILVGLIEFI

>Isc022877  
MAAKYRNTTLRLSNVGYWYPYVFTVNQPDGTFRLKGITGSMIDYILASMGIKYQLVDPDCHKW  
GNLEPDGWSGMIGQINRNEADLALGPFVLTREAMVANPSPPYTDEDMIILSGVAKEHKS NV  
YGYISAFDLHVVMVLLCFLGFVATVAVVAEYLLSNPEMSIRQRRQLTRIFWTFVASVFLESSTF  
NFTSHSQRLFGFWFLMIVVLMNTFVSYMESALMLKEETDRVETIEQLALHPDIQPMVFEAAG  
FLQVIREAEGQAFQKVLRMMEEYDHEEEVHGEELFTPPYLSMVLKRKAVFLMERISLLARVSQ  
HCYDVELKGQGLFHLGRKRILQIKMVFYVRKTM DPVLQASATPPQEEIFKRVRWIMDSGLNLH  
WHEDLIPDPGPCWTKFHPDHLHDYASLNYQDFAVIFYLLCSHGLAFCGYLSELVLFHWCCCLK  
SRSRIGPNSYLN

>Isc023268  
LYQVVFQAAIDIVNEDSSVNLEPDILPVVDILPEDDSYEAVRDACRLLEQGVA AIFGPMMSGVSSV  
HVSSVCDLNVPHLETRWDPFMEDSDDSINIFPHPNVLA EAYTALMKYWEWSALAILYDEDDA  
IVQLKDLLQELREDGIEVS YFFRNSSDSFRDVLKKIKEAEYVNIFVAIEDEDLEVFLKQAMQIEM  
LGEEYNYLFMSLDFHVADLSDFIYAKANITALRIVDVEDPVADIFQKKIDENLLR TLSLATLRLTI  
VKHFVAKKKYLELRQVIGTKSRHMSSEVLATPAITYGIYNAHFPQVAFDGLTGTVKFDEHGFR  
KDFQLYVTELGTDGLEEIGTWSPTSGLNITKDEEEKGDDVLRVVVISVSFVLHKPFVIVNDE  
DGSPKFSGFCVDLLQELSAMLDFKYELHAS YDGRYGS LQEDGQWNGMVGELTNGNADLAM  
ADLTITEQRERVVDFTLPFMSTGLAIVTKKGEMRPGGIWSSFFLPLTREVVVYVILATTCTIFVM  
YIGARLSFREWTLVEDGKGEECMENRFNLFNCF LFFVTTLLHQRLTLDPRAPATRVLAGFWYFF  
TFIILAIHVSNLCE SILWEDDGPDYDTAQELLRARGFTYVVVHHGSSQKFLQDSKVPLHQRISSL  
VERNRYNLPTSVDGLQRVKDEDKVAFV METASAAAYATQEDCNFSRTDPFV FHSAYGFATPRD  
SPYRSKLSEGILKLQENGLQWIQQRWWNPKR

>Isc023274  
CNLISSGVA AIFGPNDPMIGAHIQSLSDSLDIPHIESRLDLEPDAKDCSVNLHPDPHITGKSMRDL  
VDYLNWTRIAVLYQDDISLISLQELVRPFPK NVQYLFRAENFTATLMDIKSRGIYSMIIDVRPE  
NLTAFLRAILQIQMNDYKYHYHFATYDIEAYNLEDFQYNFVNITAYRMVDSDNQTVRHIMKDM  
EKFPFGQNILNRTNVIITEPALMFD AVYAFAHGLNDLQRSTTLR PANVSCEDVSWTEGTSLFN  
LISMVDFYGLTGNIRFNEGNRTSLKLDLLKLRQNFLEKVG EWSTNDGLNITNHNAFHDFGTSNI  
TLRVTTIESRPYVMMKDNKNLTGNDRFDGFCIDLLRTIADLLGFNYELYLVPDKKFGVENTSTG  
EWNGMVREIIDKNADLAVAPMTINYARESVIDFTKPFMN LGIGILFMLPSGMPVKLFSFMSPLD  
VDIWL YVLAAYILVSFTMFIVARS DGAKTSRTKKSRRYTEPQTRVLLYNLNIFFKLSCQKQLQSC  
DLNPKAMSTRIVGTIWWFFTLILISSYTANLAAFLTVERMITPIESVEDLAEQSKIAYGTLDSGST  
MTFFRDSKIETYQKMWR YMENRPTVFVSTYEDGARVLQGN YAFLMESTMLDFMVQRDCNLT  
QVGGLLDSKGYGIATPMGSPWRDKISLA ILDLQEKGVIQMLYNKWWKSPGLTCNRDDKNKEG  
KANALGLANIGGVFVLLCGLAVAIVTAVMEFCINSRKHAQTDRQSLCSEMAEELRFAVRCRA  
SRQRPALRRQCSKCIPGTTYVPSAMDL PQENGIMQMLE

Table S3. Protein sequences of OBP used to construct phylogenetic tree.

| Accession number | organism                          | Abbreviated name |
|------------------|-----------------------------------|------------------|
| XP_022672530.1   | <i>Varroa destructor</i>          | Vd1              |
| XP_022666940.1   | <i>Varroa destructor</i>          | Vd2              |
| XP_022645714.1   | <i>Varroa destructor</i>          | Vd3              |
| XP_022653293.1   | <i>Varroa destructor</i>          | Vd4              |
| XP_022653281.1   | <i>Varroa destructor</i>          | Vd5              |
| JZ172282.1       | <i>Amblyomma americanum</i>       | Aam              |
| OQR79252.1       | <i>Tropilaelaps mercedesae</i>    | Tp1              |
| OQR73552.1       | <i>Tropilaelaps mercedesae</i>    | Tp2              |
| OQR80083.1       | <i>Tropilaelaps mercedesae</i>    | Tp3              |
| OQR74725.1       | <i>Tropilaelaps mercedesae</i>    | Tp4              |
| EEC12103.1       | <i>Ixodes scapularis</i>          | Ix1              |
| XP_002399632.1   | <i>Ixodes scapularis</i>          | Ix2              |
| XP_002433530.1   | <i>Ixodes scapularis</i>          | Ix3              |
| KFM70022.1       | <i>Stegodyphus mimosarum</i>      | Sm1              |
| KFM79180.1       | <i>Stegodyphus mimosarum</i>      | Sm2              |
| XP_025016893.1   | <i>Tetranychus urticae</i>        | Tu1              |
| XP_015782945.1   | <i>Tetranychus urticae</i>        | Tu2              |
| XP_015791022.1   | <i>Tetranychus urticae</i>        | Tu3              |
| XP_015794342.1   | <i>Tetranychus urticae</i>        | Tu4              |
| KPM10930.1       | <i>Sarcoptes scabiei</i>          | Sc1              |
| KPM10909.1       | <i>Sarcoptes scabiei</i>          | Sc2              |
| OXU16759.1       | <i>Trichomalopsis sarcophagae</i> | Ts1              |
| OXU23289.1       | <i>Trichomalopsis sarcophagae</i> | Ts2              |
| EAT43854.1       | <i>Aedes aegypti</i>              | Aa1              |
| EAT36416.1       | <i>Aedes aegypti</i>              | Aa2              |
| XP_019538846.2   | <i>Aedes albopictus</i>           | Aal              |
| KPI92605.1       | <i>Papilio xuthus</i>             | Px               |
| OXA59970.1       | <i>Folsomia candida</i>           | Fc               |

|                |                              |    |
|----------------|------------------------------|----|
| XP_002039957.1 | <i>Drosophila sechellia</i>  | Ds |
| XP_017053738.1 | <i>Drosophila ficusphila</i> | Df |
| OTF72123.1     | <i>Euroglyphus maynei</i>    | Em |
| ODM87445.1     | <i>Orchesella cincta</i>     | Oc |
| XP_002066115.1 | <i>Drosophila willistoni</i> | Dw |

|                                                                                                                                                                                                                                              |
|----------------------------------------------------------------------------------------------------------------------------------------------------------------------------------------------------------------------------------------------|
| <p>&gt;DgalOBP1 (GAIF01000051.1 lcl ORF1)</p> <p>MKAIVLVALAAVIYVVSGDTATGDHNETSKFGKWRSCIAEKLPADKKPVFDGCATKPGGTD<br/>QSKFRRGLGCVLESYGLTKDQEVDLKKMGSTAASVSSPELKKAFQECPKDEKNSAEDRTIKC<br/>VIDHLETQCKVEQ</p>                                      |
| <p>&gt;DgalOBP2 (GAIF01009917.1 lcl ORF5)</p> <p>MKAIVLVALAAVIYVVSADTATGDHNETSKFGKWRSCIAEKLPADKKPVFDGCATKPGGTD<br/>QSKFRRGLGCVLESYGLTKDVKDLKKMGSTAASVSSPELKKAFQECPKDEKNSAEDRTIKC<br/>VIDHLETQCKVEQ</p>                                       |
| <p>&gt;DgalOBP3 (GAIF01034646.1 lcl ORF7)</p> <p>MKTLIFGFVVVFAYLAAGDTATGDHQPDTNQFGRWRSCLTSKLPADKQATMQGCVSRPGGT<br/>DMSKFRRGLECVLDSYGVVKDHRVNLQKMSRTAPTVRSAELKKAFQECPRDDKNVSLDRSIK<br/>CVIDHLETSCPLDKNRG</p>                                  |
| <p>&gt;DgalOBP4 (GAIF01001373.1 lcl ORF7)</p> <p>MKTLIFGFVVVFAYLAAGDTATGDHQPDTNQFGRWRSCLTSKLPADKQATMQGCVSRPGGT<br/>DMSKFRRGLECVLDSYGVVKDHRVNLQKMSRTAPTVRSAELKKAFQECPRDDKNVSLDRSIK<br/>CVIDHLETSCPLEKNRG</p>                                  |
| <p>&gt;DgalOBP5 (GAIF01024919.1lcl ORF6)</p> <p>MKTLIFGFVVVFAYLAAGDTATGDHQPDTNQFGRWRSCLTSKLPADKQATMQGCVSRPGGT<br/>DMSKFRRGLECVLDSYGVVKDHRVNLQKMSRTAPTVRSAELKKAFQECPRDDKNVSLDRSIK<br/>CVIDHGDVLSARKEPRLSLLNPTRRQWAGKTAKRGRKKQEEARSPHRGTWH</p> |
| <p>&gt;Vd1</p> <p>MKVVFVIIALVGMKAAPQAPASATPAKVPVIEWGKCEQLKPSESERTSKAAVVDKCLQSLPLP<br/>DPEKATQQEIDKHRESVTTCALKAEGWFDDEGVYKFDRARNEIKNKKLDSEVEEA VLLKHDA<br/>CQKEATEKHDDYINQVQLYQACMDYNISQICGIKVMV</p>                                          |
| <p>&gt;Vd2</p>                                                                                                                                                                                                                               |

|                                                                                                                                                                                                                                                       |
|-------------------------------------------------------------------------------------------------------------------------------------------------------------------------------------------------------------------------------------------------------|
| MHRSFVLQCCGLLFIVGLALAGPLAKDKSERITPKQTVVEFFTSNWGECEPLKNPLVLPEISDA<br>ATWERC RVHIPLSPDQVEEALPNLSRCMLKVIGWVRANGNMNLTKYMDYLSQAGLDDKTLE<br>LTKTAHEKCSQRALSDGSGDYKEQDKIYVECIFRHFDKTCPPNFQAAVKQGYIVGITQISFVPR<br>YDEVEVESDTDAETEGQAGPSVADATGEAAANDNANGSGGPQ  |
| >Vd3<br>MKTFIGLVLVGMAMAAPPASGGPEAGKPPTIEWGKCSQLKPSDSERMTKAAVVEKCVQSLPLP<br>EAGKASQAEIEKHREDVTTCALKAEGWFDDKGVYKFDRARDEIKNKKLASDIETPVLEKHAE<br>CQKEAGEKHTSDYIKQVQLYQACMDFNISQICGIKVV5                                                                   |
| >Vd4<br>MNAAVYIVTAMLACCCSADTASGDHASDTSQFGKWR TCLADKLP AKKREVFDECFIKPGGTD<br>MNKFRRLNLCVLTSDGLLNHKVDLKKMSMTAASAGSPELKKAYENC PKDDKNTSEDRSIK<br>LIDHLEVDCKLASK                                                                                           |
| >Vd5<br>MYENRLLHLNGICGGGIQADRCEPAYLPDTVVRIIVKMKTLV VALLASTACLTAADTATGDHQP<br>DSNQFGRWR TCLKSKIPENKQPGMEACINKPGGTDMSKFRRLGCVLESYGIVNNHRVDLTK<br>MRSSASLVTPELKKAFMECPKDDKNSSLDRSIKVIDHLETSCSAVKAQG                                                      |
| >Aam JZ172282.1 Amblyomma americanum cDNA, mRNA<br>sequenceMVAFKAAALLC VLVLPAAAYCQSAAEPPRPDINWGKCPQLQPSKEERQQKALVIDTCL<br>EKVPLPDVEHANETVIQQHREDVTTALHSEGWFNKNQYRFDRARTEILNKKLAADVEPKV<br>LAKHDECKKEAEEKFAHQFVAQVQLYQACMDYHISQICGIQIQGAQGGAAAPAHG     |
| >Tp1<br>MKT LVIALIAGTACLAADIATGDHQPDTNQFGQWR TCLKSKIPQDKQATMDNCVKKPGGTD<br>MAKFRRGISCVLESYG VVNGHRVDLRKMGSTASSVRSPELKKAFQECPKDDKNASLDRSIKCV<br>IDHLETSCPLVKAQG                                                                                        |
| >Tp2<br>MKVFVVMALMGMAMAAPQAPAAPTSAKAPVIEWGKCDQLKPS ENERTSKAAVVDKCLQSLP<br>LPDPEKATQQEIDKHRESVTTALKAEGWFDDKGVYKFDRARNEIKNKKLDGEIEAAVLVKH<br>DACQKEATEKHEDYINQVQLYQACMDYNISQICGIKVMV                                                                    |
| >Tp3<br>VEQFFTSNWGECEPLKNPLVLPEISDGSTWERCRAHIPLTPEQVEEALPNLSRCMLKVIGWVRP<br>NGNMNLTKYMDYLSQAGLDEKTLELT KIAHEKCSQRALSDGAGNYKEQDKIYVECIFRHFDK<br>TCPPNFQAAVKQGYIVGITQISFVPRYDDVEMEVSDADAEDPNGAYPGPGADDANASSGGSS<br>NNNNKDDSNNNNKADSNGDAQ                |
| >Tp4<br>MSKVLTLTYTNGFNVHKL GALLVSMAYSFSPTEDRPVIEQCLGQHDNETVMELIKCYMEKMNI<br>MGGGNMCEVKKLKDLLASKMTAAPPVATAVLQKYAECICQNSGAEGMVCVQKTM DYAKTF<br>CSAIVGDD                                                                                                 |
| >Ix1<br>MWTSAGKSALVTLGVLLAVGVGLGDAGPVPDPKKT DKPEKQTIHEFFSSNWGACEPLKNPLVIP<br>EMSNPTTWVKCQKHLPEHPQDIEEYLPRLSRCMLKSTGWVRSNGNMNLSKYLQYLSLLGLDD<br>ETMNGTREA HKCIAKAYKEKDYKTQDKVYVECIFKFFTKSCSANFQGAVKEGYIVGITQLSF<br>MPRMGPLEVVDDVEAEVSEDDAPQDVLPTNSTSTS |
| >Ix2MVAFKVSVAVLLCVGSAFAIPAGGKDL DAAAQTQAGVPPRPQINWGKCPQLQPSENERQQ                                                                                                                                                                                     |

|                                                                                                                                                                                                                                                                                                                                                                                                 |
|-------------------------------------------------------------------------------------------------------------------------------------------------------------------------------------------------------------------------------------------------------------------------------------------------------------------------------------------------------------------------------------------------|
| KALVIDQCLDKVPLPDVDTANDTVIQQHRQDVTTALKTEGWFNSNGQYRFDRARTEILNKK<br>LAKDVEPQVLSKHDECKKEAEEKFAKNFVAQVQLYQACMDYHISQICGIIAQAAEAHPQGA<br>QQG                                                                                                                                                                                                                                                           |
| >Ix3<br>MKILLITVVVCVFAATDASRRSTRRQFTDWRNCMVEQLPSEKKPIYDACYNRSRGTMHKF<br>REGLKCVLTDYNLLNGTKIDLAAMTTRASSVSGKLGQAFTDCPKDDHNRNAAGVKCIIDRL<br>ETDCPVPTGSTAH                                                                                                                                                                                                                                          |
| >Sm1<br>MLLSVLLTLFGVGVILAAPPTTVQPQNEASLESQNYVPVQIDWKGKCPQLKPTADKEQKRLVIQ<br>KCLDQNPAPALETVTDPKQIDDHRELVTTALKTEGWFNEDGSYKFNRAKTEIESKKLDSQVE<br>KNISKRHQECQDEAVKRFPGGYIQVQLYQACMDYHIAEICEIELIPPPGGFPIEEFGDYDESPL<br>QPEQPEKSQETTTQPQAQPASAK                                                                                                                                                       |
| >Sm2<br>MKCFVLAVLCFAAVAIAQEVQVNVWGKCPELEPTAEEQKSKGEVIQQCLEKNPPAEGASLTQE<br>QIDAHRETITTCALKTEGWFADNKYNYQRARKEIQSKNLKPEAEILAKHDECSKEAKENFPD<br>NNIPQVQLYQACMDFHITKICEIKITPPATEAPAAASA                                                                                                                                                                                                             |
| >Tu2<br>MINSLSHVSLSCLIVLVNSSNCAPQATPNRQGGFSGQLQGPPQPPQINWGKCPQLEPVESDKK<br>AKADISSCLKSIALPENMTQETVEKHRTEVARCALNAENWFTEDGKYRYDKAESEIKAKKLS<br>QEVEPQILRQHGECKEAEQGFPFGIAQIQLYQACMDYHISQICGITIVGPSSPQ                                                                                                                                                                                             |
| >Tu3<br>MILITLCLVVLAINSSYGQPQRFLAPQPTSDQLEGSPQGGFPGQPQPPQPPQINWGKCPQLEPK<br>ESDKKAKADISSCIKSIPLPENVTQESIEKHRTEVAICALNAENWFSADMKYRYDKAESEIRAK<br>KLVSDVEPLVLRQHGECKEAEQGFPFGIAQVQLYQACMDYHISQICGITIVGASSPQ                                                                                                                                                                                       |
| >Tu4<br>MNYLSL CVFIIFLTIGFSESARLPRSTSSPATSSSTTTTSSSTVNNKNEENQPSTSSASSSAGSATG<br>GPTINWGRCPQLEPTNEEKIKKAAVITKLESTPVPVNITRETVELHREQVAACALRMEGWFNG<br>QGLYRFDKAENEIKAKKLTREVEEKVLSFHRQCKDEAEEKYPVSSNQLIAQIQLYQACMDYFIS<br>EVCGIEVQIAGSEGSSE                                                                                                                                                        |
| >Sc1<br>MMAIHQLFLTTVASLWSVMLMTAVVALPQPLNTSTNNKPADSISTASSSSIDSNVPLMASASSPS<br>GQNLRSSSQPMLLTLEQQQELLDQLAQLQRQTQQLLAAQQSLAAVAAAAVNGNNGVSIQ<br>TPLDGNSNNDAGSHSPITSGSIQYHRQQNQQTHTPTTQQLNNPTSNOQSAAIRNDNIDQGSLEQ<br>SQSKSNQLNQMINNAQNSQSQMSGLPQSPQINWGKCPLEPSEQEKLAKANVITKLETTPLP<br>ANITRESVEQHREQIAGCALRSEGWFTPNGGYDFSKAEKEIRNKHLQADLENQVLNYHGQCR<br>VESEEKYPTSNSIIAQIQLYQACMDYFISDVCGIEVNDTDSPOF |
| >Tu1<br>MKNLQSITILCLIFGFIVSTVYSQPLGSSDSNPDTQDTKEASTSVNDKSSDQEGSSEDEDAPTPV<br>AGPHRPPTINWGKCPQLEPKEAEKKQKADIIRTCLKSITLPENITQESVEKHRTEVAKCALNAEN<br>WFAEDGSYRYDKAESEIKNKKLQPEIEPQIVNQHSECKEAEQFPFGIAQIQLYQACMDYHIS<br>MICGIQIVGTGYSQ                                                                                                                                                              |
| >Sc2<br>MIANMNLALAIILLLAHLCDQAQSTEKLDKSKLKQQQLPQRPKIDWKGKCPQLEPSEKDIKSKS<br>NILQRCLKENPPPNDQSDITPELIIGHQKNVTECALKIENWFDKKGDKYKFEKAEKEIKNKKLSSE                                                                                                                                                                                                                                                  |

|                                                                                                                                                                                                                                                                                                                                                    |
|----------------------------------------------------------------------------------------------------------------------------------------------------------------------------------------------------------------------------------------------------------------------------------------------------------------------------------------------------|
| MQKALVGS HQDCAEVSKTQKKQSKTPMDVVEQVQIYQGCM DAHITQHCQIKIGA                                                                                                                                                                                                                                                                                           |
| <p>&gt;Ts1</p> <p>MSSNLKMINMIGSWILNVTSSNKSRYWKNKYEACFDYKEGSVIICGQYLISMSRHLIITLTLFSA<br/> VFVVKLSLSPEEREARDKCLKENGFSREPDFIGNDAVDMRTKCYAACALRGYGIMNEDGSIDIN<br/> KILEHISDTKNKDIDVKKSLIIPCAEKKGETDCDTGYLITNCVVLASLSQEDIDARNKCLKEHGF<br/> TIEPKYVSAYKTIDTRAKCYASCLMRETGVIKEDGSIDLNVLEKISDPENKTLDEDVKKSFIPC<br/> TEKKGDNDCDTVHQILT CIVATISILKESMKIV</p> |
| <p>&gt;Ts2</p> <p>MLANTARLNAFAMCMLQQFNVMDSNGMVNPDVMSYSIISTV PNATAGISQQCISKRGIDAVNT<br/> ARMIMNCYL RANQMVLALSRRDRTYIIRINYITVACPVLAYLQASFSPLIENDFHAYEADCGAK<br/> SGASDESIEAARRARQLPQSPQMNAFALCMMQKYK VMAADGSVNP D VRSYGIITDGP DNTWR<br/> VSEHCRDL DGNSSGETARMIMNCYLDNNQLVMGLTPR VSA</p>                                                              |
| <p>&gt;Aa1</p> <p>MQVLNFLCLVLLCLVLEKVAVAEECIKFEDHKDEILNCCKYQPPYPKDDVKECVQEAQGKSGG<br/> DKHEFFACLLECYLPKIGIINGDSIDEDKISEHLQSLDENARDILLAAYKECDESTTGTTRAQCSS<br/> YALDLET CVLQKLDQCPDEFYNPSEICDKL KSGVEICH</p>                                                                                                                                        |
| <p>&gt;Aa2</p> <p>MKATVTSVLVLLAISHATLADPAAPDNVPASCLNKNFNVDPFECCKTPKLLDEGTVKECVHSFP<br/> PPQNAQDEIKPDCMSECVMNSTRIFDRRQNVNDAKAMETFLEKLNKGSVWAEIVQKAVKQCL<br/> DDADNRKEEFSRDMKALQQKFPKERICSPAAGFIMECVHVS VYKNC PASIFKDNLAGCPAIKK<br/> HLNV D NCPFYTIFPEKKAPKPVKRH</p>                                                                                 |
| <p>&gt;Aa1</p> <p>MKAIVASVLVLLALSHTTRADASAPDDVPATCLNKNFNVDPFECCKTPKLLDET VVKQCVKSY<br/> PPPQDVKDEIKPDCMSECVMNSTQIFDRRQNVNDAKAMETFLEKLNKGSVWADIVQKAVMQ<br/> CLDDADNRKEEFNRDMKALQQRFPKERICSPAAGFIMECVHVVVYKNC PASVFKDSL TGCPAI<br/> KKHLNV D NCPFYTIFPEKKG NKAKKH</p>                                                                                |
| <p>&gt;Px</p> <p>MSKLYCVFLFLGLAVSLRHVRALSQEDIAAIKTGLRPLIAECGKEFGVDEADIKKAKESGKIESL<br/> DPCLFACIGKMG MINDKGEFDVEKSSETVKKFVTDKDEQKQILEIIEKCSSVNDEAVSDDKGC<br/> DRAVLLHKCMEPYKDQGNLGLDQSYADLVIECAKEFPITTEDIAQLQNKQLPDKESVKCLF<br/> ACAYKKAGMMDDEGKMSVEGALEVINKYLADDPDTMKKAIDFTNACSTV NDAEVS DGTGK<br/> CDRAALMFRC SIDKADEFDINL</p>                   |
| <p>&gt;Fc</p> <p>MQPTLHFVLLCTIGVLHFQDGVFAAEEKPCNAV VADLTKKQLGGISACTKALKFKDAKEKAK<br/> KTTICIMKCVL KKEALLDEKGQLTLEQFDKFLAKHFPDSMTEKANSTFRPCVDGALKGMD DTE<br/> EFCKDYDPMIKCLLSTFPNESDKSCKQIMADMTKRQLSGITKCIKGMKFKNGKEKA AKMNCI<br/> MKCAMENEGLVSKTGDISREQIDEILIREFPSSLLERANATFQPCVEKYAGTMDANPETDPLCAT<br/> YDPVIKCLISALPNLCPPA</p>                   |
| <p>&gt;Df</p> <p>MLRTGILIFVVL SQFLEGPLAIRIHC RHTERIHEENIHHCKHPDGHNDVTEMCAKQTNFKLPNP<br/> NEEAIEDVTVDQAMVGT CWAKCVFDHYNLMENNTLDMAKVRHYYKRYHKIDPEYETEMLN<br/> AYESCHSKSEDATEQFLSLPIVRAFATSKFCKPTSSII MSCVIYHFFHNC PKNRWSNTTECVETLA<br/> FAKKCKDVLTTM</p>                                                                                             |
| <p>&gt;Em</p>                                                                                                                                                                                                                                                                                                                                      |



|                                                                                                                                                                                                                  |
|------------------------------------------------------------------------------------------------------------------------------------------------------------------------------------------------------------------|
| <p>QLPRAPKINWGRCPQLEPTQRDIEAKSSILQECLRQNPPPQSESITQEIIQREYKYEKAEKEIKN<br/>KNLAKEMEKVLLESHKQCSQIAKDRKQAVKNLSNVEQVQIYQGCM DAHITQNCQIQISAV</p>                                                                       |
| <p>&gt;Oc<br/>MMKLCLLV TACILAVISVQAQDLKSCRAVFSEQNRKQLTWINGCVKQLGYKSAREKTQKSTCV<br/>WKCVDNDFNMLNADGNMDVNQYNHHLQEEWPAHMLDRANSTFQPCLKIGSETTQDEFCKG<br/>YDPLIKCMTRNFANLCKGIK</p>                                     |
| <p>&gt;Dw<br/>MSASHLLILTCCLVLAQNVRGQTQINCQRPPQLVDPSLCCRDGGRDQITEQCAQKIVGSAANGP<br/>PSIETATCLAECILTTSNYITEPQKINATNIRNLSAKFSDKEYVEAMSMFAFKCEPQAQQLAVI<br/>QQQRQPKCSPFSAILLGCTYMEYFKNCPANRWTQSTECALAKTFVTQCGLGA</p> |

**Table S4.** Protein sequences of OBP used to construct motif analysis

| Accession number | E-value | organism                   | Abbreviated name |
|------------------|---------|----------------------------|------------------|
| XP_022672530.1   | 6e-116  | Varroa destructor          | Vd1              |
| XP_022666940.1   | 3e-173  | Varroa destructor          | Vd2              |
| XP_022645714.1   | 5e-117  | Varroa destructor          | Vd3              |
| XP_022653293.1   | 7e-97   | Varroa destructor          | Vd4              |
| XP_022653281.1   | 2e-129  | Varroa destructor          | Vd5              |
| JZ172282.1       |         | Amblyomma americanum       | Aam              |
| OQR79252.1       | 2e-99   | Tropilaelaps mercedesae    | Tp1              |
| OQR73552.1       | 8e-117  | Tropilaelaps mercedesae    | Tp2              |
| OQR80083.1       | 3e-156  | Tropilaelaps mercedesae    | Tp3              |
| EEC12103.1       | 3e-167  | Ixodes scapularis          | Ix1              |
| XP_002399632.1   | 1e-135  | Ixodes scapularis          | Ix2              |
| XP_002433530.1   | 2e-98   | Ixodes scapularis          | Ix3              |
| KFM70022.1       | 2e-156  | Stegodyphus mimosarum      | Sm1              |
| KFM79180.1       | 2e-117  | Stegodyphus mimosarum      | Sm2              |
| XP_025016893.1   | 2e-131  | Tetranychus urticae        | Tu1              |
| XP_015782945.1   | 2e-125  | Tetranychus urticae        | Tu2              |
| XP_015791022.1   | 1e-135  | Tetranychus urticae        | Tu3              |
| XP_015794342.1   | 2e-155  | Tetranychus urticae        | Tu4              |
| KPM10930.1       | 0.0     | Sarcoptes scabiei          | Sc1              |
| KPM10909.1       | 9e-130  | Sarcoptes scabiei          | Sc2              |
| OXU23289.1       | 4e-169  | Trichomalopsis sarcophagae | Ts2              |
| XP_017053738.1   | 1e-151  | Drosophila ficusphila      | Df               |
| OTF72123.1       | 5e-85   | Euroglyphus maynei         | Em               |
| XP_002066115.1   | 2e-132  | Drosophila willistoni      | Dw               |

>DgalOBP1 (GAIF01000051.1 |cl|ORF1)

|                                                                                                                                                                                                                                                                             |
|-----------------------------------------------------------------------------------------------------------------------------------------------------------------------------------------------------------------------------------------------------------------------------|
| <p>MKAIVLVALAAVIYVVSAGDTATGDHNETSKFGKWRSCIAEKLPADKKPVFDGCATKPGGTD<br/>QSKFRRGLGCVLESYGLTKDQEVDLKKMGSTAASVSSPELKKAFQECPKDEKNSAEDRTIKC<br/>VIDHLETQCKVEQ</p>                                                                                                                  |
| <p>&gt;DgalOBP2 (GAIF01009917.1 lc ORF5)</p> <p>MKAIVLVALAAVIYVVSADTATGDHNETSKFGKWRSCIAEKLPADKKPVFDGCATKPGGTD<br/>QSKFRRGLGCVLESYGLTKDQVLDLKKMGSTAASVSSPELKKAFQECPKDEKNSAEDRTIKC<br/>VIDHLETQCKVEQ</p>                                                                      |
| <p>&gt;DgalOBP3 (GAIF01034646.1 lc ORF7)</p> <p>MKTLIFGFVVVFAYLAAGDTATGDHQPDTNQFGRWRSCLTSKLPADKQATMQGCVSRPGGT<br/>DMSKFRRGLECVLDSYGVVKDHRVNLQKMSRTAPTIVRSaelkkafqecprddkNVSLDRSIK<br/>CVIDHLETSCPLDKNRG</p>                                                                 |
| <p>&gt;DgalOBP4 (GAIF01001373.1lc ORF7)</p> <p>MKTLIFGFVVVFAYLAAGDTATGDHQPDTNQFGRWRSCLTSKLPADKQATMQGCVSRPGGT<br/>DMSKFRRGLECVLDSYGVVKDHRVNLQKMSRTAPTIVRSaelkkafqecprddkNVSLDRSIK<br/>CVIDHLETSCPLEKNRG</p>                                                                  |
| <p>&gt;DgalOBP5 (GAIF01024919.1lc ORF6)</p> <p>MKTLIFGFVVVFAYLAAGDTATGDHQPDTNQFGRWRSCLTSKLPADKQATMQGCVSRPGGT<br/>DMSKFRRGLECVLDSYGVVKDHRVNLQKMSRTAPTIVRSaelkkafqecprddkNVSLDRSIK<br/>CVIDHGDVLSARKEPRLSLLNPTRRQWAGKTAKRGRKKQEEARSPHRGTWH</p>                                |
| <p>&gt;Vd1</p> <p>MKVVFVIALVGMMAKAPASATPAKVPVIEWWGKCEQLKPSESERTSKAAVVDKCLQSLPLPD<br/>PEKATQQEIDKHRESVTTCALKAEGWFDDEGVYKFDRARNEIKNKKLDSEVEEAVLLKHDAC<br/>QKEATEKHDDYINQVQLYQACMDYNISQICGKVMV</p>                                                                             |
| <p>&gt;Vd2</p> <p>MHRSFVLQCCGLLFIVGLALAGPLAKDKSERITPKQTVVEFFTSNWGECEPLKNPLVLPEISDAA<br/>TWERCVRVHIPLSPDQVEEALPNLSRCMLKVIGWVRANGNMNLTKYMDYLSQAGLDDKTLELT<br/>KTAHEKCSQRALSDGSGDYKEQDKIYVECFRHFDTCPNPFQAAVKQGYIVGITQISFVPRYD<br/>EVEVESDTDAETEGQAGPSVADATGEEAANDNANGSGGPQ</p> |
| <p>&gt;Vd3</p> <p>MKTFIGLVLVGMAMAAPPASGGPEAGKPPTIEWGKCSQLKPSDSERMTKAAVVEKCVQSLPLP<br/>EAGKASQAEIEKHREDVTTCALKAEGWFDDKGVYKFDRARDEIKNKKLASDIETPVLEKHA<br/>CQKEAGEKHTSDYIKQVQLYQACMDFNISQICGKVVVS</p>                                                                          |
| <p>&gt;Vd4</p> <p>MNAAVYIVTAMLACCSADTASGDHASDTSQFGKWRTCLADKLPKAKREVDFECFIKPGGTD<br/>MNFRRGLNVCVLTSDGLLNHKVDLKKMSMTAASAGSPELKKAYENCPKDDKNTSEDRSIKC</p>                                                                                                                       |

|                                                                                                                                                                                                                                                |
|------------------------------------------------------------------------------------------------------------------------------------------------------------------------------------------------------------------------------------------------|
| LIDHLEVDCKLASK                                                                                                                                                                                                                                 |
| >Vd5<br>MKTLLVALLASTACLTAADTATGDHQPDSNQFGRWRTCLKSKIPENKQPGMEACINKPGGTD<br>SKFRRGLGCVLESYGIVNNHRVDLTKMRSSASLVTSPELKKAFMECPKDDKNSSLDRSIKCV<br>HLETSCSAVKAQG                                                                                      |
| >Tp1<br>MKTLLVIALIAGTACLAADTATGDHQPDTNQFGQWRTCLKSKIPQDKQATMDNCVKKPGGTD<br>MAKFRRGISCVLESYGIVNGHRVDLRKMGSTASSVRSPELKKAFQECPKDDKNASLDRSIKCV<br>IDHLETSCPLVKAQG                                                                                   |
| >Tp2<br>MKVFFVMALMGMAMAAPQAPAAPTSAKAPVIEWGKCDQLKPSNERSTKA AVVDKCLQSLP<br>LPDPEKATQQEIDKHRESVTTCALKAEGWFDDKGVYKFDRARNEIKNKLDGEIEAAVLVKH<br>DACQKEATEKHEDYINQVQLYQACMDYNISQICGIKVMV                                                              |
| >Tp3<br>VEQFFTSNWGECEPLKNPLVLEISDGSTWERCRAHIPLTPEQVEEALPNLSRCMLKVIGWVRP<br>NGNMNLTKYMDYLSQAGLDEKTLELTKIAHEKCSQRALSDGAGNYKEQDKIYVECIFRHF<br>TCPPNFQAAVKQGYIVGITQISFVPRYDDVEMEVSDADAEDPNGAYPGPGADDANASSGGSS<br>NNNNKDDSNNNNKADSNNGDAQ            |
| >Ix1<br>MWTSAKGSALVTLGVLLAVGVGLDAGVDPKKTDKPEKQTIHEFFSSNWGACEPLKNPLVIP<br>EMSNPTTWVKCQKHLPEHPQDIEEYLPRLSRCMLKSTGWVRSNGNMNLSKYLQYLSLLGLDD<br>ETMNGTREAHKGCIKAYKEKDYKTQDKVYVECIFKFFTKSCSANFQAVKEGYIVGITQLSF<br>MPRMGPLEVDDVEAEVSEDDAPQDVLPTNSTSTS |
| >Ix2<br>MVAFKVSVAVLLCVGSAFAIPAGGKDLDAQAQTQAGVPPRPQINWGKCPQLQPSENERQQKAL<br>VIDQCLDKVPLPDVDTANDTVIQHRQDVTTALKTEGWFNSNGQYRFDRARTEILNKKLAK<br>DVEPQVLSKHDECKEAEKFAKNFVAQVQLYQACMDYHISQICGIQIAQAAEAHPQGAQQG                                        |
| >Ix3<br>MKILLITVVVCVFAATDASRRSTRRQFTDWRNCMVEQLPSEKKPIYDACYNRSRGTD MHKF<br>REGLKCVLTDYNLLNGTKIDLAAMTTRASSVSGKLGQAFDTCPKDDHNRNAAGVKCIIDRL<br>ETDCPVPTGSTAH                                                                                       |
| >Sm1<br>MLLSVLLTLFGVGVILAAPPTTVQPQNEASLESQNYVPVQIDWGKCPQLKPTADKEQKRLVIQ<br>KCLDQNPAPALETVTDPKQIDHRELVTTCALKTEGWFNEDGSYKFNRAKTEIESKKLDSQVE<br>KNISKRHQECQDEAVKRFPGGYIQVQLYQACMDYHIAEICEIELIPPPGGFPIEEFGDYDESPL<br>QPEQPEKSQETTTQPQAQPASAK       |
| >Sm2<br>MKCFVLAVLCFAAVAIAQEVQVNWGKCELEPTAEEQKSKGEVIQQCLEKNPPAEGASLTQE<br>QIDAHRETITTCALKTEGWFNEDGSYKFNRAKTEIESKKLDSQVE<br>NNIPQVQLYQACMDYHISQICGIQIAQAAEAHPQGAQQG                                                                              |
| >Tu1                                                                                                                                                                                                                                           |

|                                                                                                                                                                                                                                                                                                                                                                                                    |
|----------------------------------------------------------------------------------------------------------------------------------------------------------------------------------------------------------------------------------------------------------------------------------------------------------------------------------------------------------------------------------------------------|
| MKNLQSITILCLIFGFIVSTVYSQPLGSSDSNPDTQDTKEASTSVNDKSSDQEGSSEDEDAPTPV<br>AGPHRPPTINWGKCPQLEPKEAEKKQKADIIRTCLKSITLPENITQESVEKHRTEVAKCALNAEN<br>WFAEDGSYRYDKAESEIKNKKLQPEIEPQIVNQHSECRKEAEEQFPSGIAQIQLYQACMDYHIS<br>MICGIQIVGTGYSQ                                                                                                                                                                       |
| >Tu2<br>MINSLSHSVSLCLIVLVVNSSNCAPQATPNRQGGFSGQLQGPPQPPQINWGKCPQLEPVESDKK<br>AKADISSCLKSIALPENMTQETVEKHRTEVARCALNAENWFTEDGKYRYDKAESEIKAKKLS<br>QEVEPQILRQHGECKEAEQGQFPSGIAQIQLYQACMDYHISQICGITIVGPSSPQ                                                                                                                                                                                              |
| >Tu3<br>MILITLCLVVLAINSSYGQQRFLAPQPTSDQLEGSPQGGFPGQPQGGPPQPPQINWGKCPQLEPK<br>ESDKKAKADISSCIKSIPLPENVTQESIEKHRTEVAICALNAENWFSADMKYRYDKAESEIRAK<br>KLVSDVEPLVLRQHGECKEAEQGQFPSGIAQVQLYQACMDYHISQICGITIVGASSPQ                                                                                                                                                                                        |
| >Tu4<br>MNYLSLVCVFIIFFLTIGFSESARLPRSTSSPATSSSTTTTSSSTVNNKNEENQPSTSSASSSAGSATG<br>GPTINWGRCPQLEPTNEEKIKKAAVITKCLESTPVPVNITRETVELHREQVAACALRMEGWENG<br>QGLYRFDKAENEIKAKKLTREVEEKVLSFHRQCKDEAEKYPVSSNQLIAQIQLYQACMDYFIS<br>EVCGIEVQIAGSEGSSE                                                                                                                                                          |
| >Sc1<br>MMAIHQLFLTTVASLWSVMLMTAVVALPQPLNTSTNNKPADSISTASSSSIDSNVPLMASASSPS<br>GQNLRSSSQPMLLTLEQQQELLDQLAQLQRQTQQLLAAQQSLAAVAAAAAVNGNNGV<br>SIGTPLDGNSSNDAGSHSPITSGSIQYHRQQNQQTHTPTTQQLNPTSNNQSSAAIRNDNIDQGSLEQ<br>SQSKSNQLNQMINNAQNSQSQSMGLPQSPQINWGKCPQLEPSEQEKLAKANVITKCLETTPLP<br>ANITRESVEQHREQIAGCALRSEGWFTPNGGYDFSKAEKEIRNKHLQADLENQVLNYHGQCR<br>VESEEKYPTSNSIIAQIQLYQACMDYFISDVCGIEVNDTDSPOF |
| >Sc2<br>MIANMNLYALAIILLLAHLCDQAQSTEKLDKSKLKQQQQLPQRPKIDWGKCPQLEPSEKDIKSKS<br>NILQRCLKENPPPNQDSITPELIIGHQKNVTECALKIENWFDKKGDKYKFEKAEKEIKNKKLSSE<br>MQKALVGSQDCAEVSKTQKKQSKTPMDVVEQVQIYQGCM DAHITQHCQIKIGA                                                                                                                                                                                           |
| >Ts2<br>MLANTARLNAFAMCMLQQFNVMDSNGMVNPDVMSYSIISTVPNATAGISQCISKRGIDAVNT<br>ARMIMNCYL RANQMVLALSRRDRTYIIRINYITVACPVLAYLQASFSPLIENDFHAYEADCGAK<br>SGASDESIEAARRARQLPQSPQMNAFALCMMQKYK VMAADGSVNPDVRSYGIITDGPDNTWR<br>VSEHCRDL DGNSSGETARMIMNCYLDNNQLVMGLTPRVA                                                                                                                                         |
| >Df<br>MLRTGILIFVVLVSQFLEGPLAIRIHCRTHERIHEENIHHCKHPDGHNDVTECAKQTNFKLPNP<br>NEEAIEDVTVDQAMVGTWAKCVFDHYNLMENNTLDMAKVRHYYKRYHKIDPEYETEMLN<br>AYESCHSKSEDATEQFLSLPIVRAFATSKFCKPTSSIIMSCVIYHFFHNC PKNRWSNTTECVETLA<br>FAKKCKDVLTTM                                                                                                                                                                      |
| >Em<br>QLPRAPKINWGRCPQLEPTQRDIEAKSSILQECLRQNPPPQSESITQEIIQREYKYEKAKEIKN<br>KNLAKEMEKVLLESHKQCSQIAKDRKQAVKNLSNVEQVQIYQGCM DAHITQNCQIQISAV                                                                                                                                                                                                                                                           |
| >Dw<br>MSASHLLILTCLVLAQNVRGQTQINCQRPPQLVDPSLCCRDGGRDQITEQCAQKIVGSAANGP<br>PSIETATCLAECILTTSNYITEPQKINATNIRNNLSAKFSDKEYVEAMSMAFTKCEPQAQQLAVI                                                                                                                                                                                                                                                        |

QQQRRQQPKCSPFSAILLGCTYMEYFKNCPANRWTQSTECALAKTFVTQCGLGA

**Table S5.** Protein sequences of NPC2 used to construct phylogenetic tree.

| Accession number                                                                                                                                                                                                                                      | organism                       | Abbreviated name |
|-------------------------------------------------------------------------------------------------------------------------------------------------------------------------------------------------------------------------------------------------------|--------------------------------|------------------|
| XP_022652195.1                                                                                                                                                                                                                                        | <i>Varroa destructor</i>       | Vd1              |
| XP_022649311.1                                                                                                                                                                                                                                        |                                | Vd2              |
| XP_022654520.1                                                                                                                                                                                                                                        |                                | Vd3              |
| XP_022654596.1                                                                                                                                                                                                                                        |                                | Vd4              |
| gi_283753684                                                                                                                                                                                                                                          |                                | Vd5              |
| NP_608637.1                                                                                                                                                                                                                                           | <i>Drosophila melanogaster</i> | Dm1              |
| NP_650331.1                                                                                                                                                                                                                                           |                                | Dm2              |
| AAN71436.1                                                                                                                                                                                                                                            |                                | Dm3              |
| ADL59625.1                                                                                                                                                                                                                                            |                                | Dm4              |
| NP_001247376.1                                                                                                                                                                                                                                        |                                | Dm5              |
| AEN25572.1                                                                                                                                                                                                                                            |                                | Dm6              |
| OQR69913.1                                                                                                                                                                                                                                            | <i>Tropilaelaps mercedesae</i> | Tm1              |
| OQR78448.1                                                                                                                                                                                                                                            |                                | Tm2              |
| OQR69614.1                                                                                                                                                                                                                                            |                                | Tm3              |
| OQR72593.1                                                                                                                                                                                                                                            |                                | Tm4              |
| OQR76180.1                                                                                                                                                                                                                                            |                                | Tm5              |
| OQR69865.1                                                                                                                                                                                                                                            |                                | Tm6              |
| EEC00381.1                                                                                                                                                                                                                                            | <i>Ixodes scapularis</i>       | Isc1             |
| EEC07080.1                                                                                                                                                                                                                                            |                                | Isc2             |
| EEC07323.1                                                                                                                                                                                                                                            |                                | Isc3             |
| EEC03680.1                                                                                                                                                                                                                                            |                                | Isc4             |
| XP_002435260.1                                                                                                                                                                                                                                        |                                | Isc5             |
| EEC08723.1                                                                                                                                                                                                                                            |                                | Isc6             |
| EEC06676.1                                                                                                                                                                                                                                            |                                | Isc7             |
| EEC13424.1                                                                                                                                                                                                                                            |                                | Isc8             |
| EEC13423.1                                                                                                                                                                                                                                            |                                | Isc9             |
| EEC18444.1                                                                                                                                                                                                                                            |                                | Isc10            |
| EEC16220.1                                                                                                                                                                                                                                            |                                | Isc11            |
| >DgalNPC2-1                    GAIF01015586.1 lcl ORF7<br>MANNFFFLIVASLALTAYAGELVQINNPVQCDGLTTIKAVYVEDCTNGEMCDLVKGHNYSLKIT<br>YTAPKDVQTAKALVTGVIGGAELPFPGQLQRYVCKTPGNEDFCPQVKGKDYTVSMVLPIMSLFP<br>KLETTATVRFIDDDAKSEAEKLGCFQLPIRLVDDPNAPKQPTRVDNEDDDE |                                |                  |
| >DgalNPC2-2                    GAIF01031731.1 lcl ORF2                                                                                                                                                                                                |                                |                  |

|                                                                                                                                                                                                   |                                                                                                                                                                                                                                                                                   |
|---------------------------------------------------------------------------------------------------------------------------------------------------------------------------------------------------|-----------------------------------------------------------------------------------------------------------------------------------------------------------------------------------------------------------------------------------------------------------------------------------|
| MANNFFLIVASLALTAYAGELVQINNPVQCDGLTTIKAVYVEDCTNGEMCDLVKGHNYSLKIT<br>YTAPKDVQTAKALVTGVIGGAELPFPGLQRYVCKTPGNEDFCPQVKGKDYTVSMVLPIMSLFP<br>KLETTATVRFIDDDAKSEAEKLGCFQLPIRLVDDPTPLSSRRALTKTTMSNERQRDDAT |                                                                                                                                                                                                                                                                                   |
| >DgalNPC2-3                                                                                                                                                                                       | GAIF01008081.1 lc ORF7<br>MANNFFLIVASLALTAYAGELVQINNPVQCDGLTTIKAVYVEDCTNGEMCDLVKGHNYSLKIT<br>YTAPKDVQTAKALVTGVIGGAELPFPGLQRYVCKTPGNEDFCPQVKGKDYTVSMVLPIMSLFP<br>KLETTATVRFIDDDAKSEAEKLGCFQLPIRLVDDPTPLSSRRALTKTTMSNTSARDDAT                                                       |
| >DgalNPC2-4                                                                                                                                                                                       | GAIF01004272.1 lc ORF7<br>MISQRIVVPLIVAVLAVAVHGSPLYKCKTPSIGTVVKVVEGCSDDVQSCVLRKGTEAKLSLTFI<br>PNVDVKSVAKAYGLIAGVPVPYPLKNSDACKDSGLSCPLKDPKVYKQAFDVMKEFPSMS<br>LTVKWVLRDEQNAHIVCPDTCQTGVVARREFWTVWTQVVSSRPLRKGCVAVGDKNVAFRPV<br>YFAVKLQ                                             |
| >DgalNPC2-5                                                                                                                                                                                       | GAIF01014813.1 lc ORF6<br>MPRFTATTA AVVIAAIVLLSASPSVLGQREITFTP CDDPGKGIVKRV TATPCDTPCELKKGSM<br>TSFNFEFIADQNTTSITLDARVRVLGIFIPVPIETDMCRVIDCPVVKGQEIVGQFNATVPRVPVKS<br>SVIRVKVIGDEGMSCCISYKVVVK                                                                                    |
| >DgalNPC2-6                                                                                                                                                                                       | GAIF01031088.1 lc ORF3<br>MAPKRGLRRVA AVPAERALATIVVLA AVCVAIVRGSPFKSCGGS AKITAVDIENCPSSAKSCTVH<br>KGA AFKVQVTFKPAKDAVNATLHKAVIINNVTKLT PCVSVCNAGLKCPLHKNVPATLQYTGH<br>VPKDSPKGKLFGLSLTDSAGSLILCAQSPIEVA                                                                           |
| >Vd1                                                                                                                                                                                              | XP_022652195.1 epididymal secretory protein E1-like [Varroa destructor]<br>MKTFLVIFALAAIAIASPFTSCNHSQGTIRTVEISGCKDTPYCVLYKGTNVNLSITFVPASDASR<br>VTVEVYGLISGFGIPYPLPNSNACARGLICPLKNGETATYKHSFPVRNGFPSIALDVIWTLFDER<br>KNRIICARFPVVIQ                                               |
| >Vd2                                                                                                                                                                                              | XP_022649311.1 epididymal secretory protein E1-like [Varroa destructor]<br>MLRFVMLAAIASAAYAGELYKVQNVQQCDGLSTIKSVEVENCTKEDLCELIRGHNHLLRVTYV<br>PPRSAQVVKVLITGFVGEAELPFPGFKRYVCKTPGNENFCPQTAGQEYTTTMVLPILSVFPNIET<br>TAFVRFIDDDAKSEAEKLGCFSMKIRLIDDPNASTEPANVDNQEDDE                |
| >Vd3                                                                                                                                                                                              | XP_022654520.1 uncharacterized protein LOC111247622 [Varroa destructor]<br>MTSVTQSALIIILVVTTWPWASFARKVQYQECNPKRNIKMMDVDNCDVQPCR VFHRTTIKMT<br>TQLSSPINSSSAEWEIRAFVNGRPYGHPEPVSDACL FVNSTSPNAFSSSHRTPLNSDQFKSGPST<br>AYRQKSFLPMCPLFAGKIYRFSNVFYVHDQFPKVATTIQYLLRGDNDEMIACARLHILMSS |
| >Vd4                                                                                                                                                                                              | XP_022654596.1 epididymal secretory protein E1-like isoform X1 [Varroa destructor]<br>MMLLDLFTVVFVAVMLMMNENNAKQLDSYVNCGGTGH IENITVVPCESEPCEFAKGSKNVNH<br>FIGSFSDANSVRVQPSVIVDKMNVTLTGVDQELCGKHVQCPIKANELRDAEIEIPIFNVPYVNIK<br>TEVVFMIFSENVLQFCVVRTKIIISDKK                        |
| >Vd5                                                                                                                                                                                              | gi_283753684<br>MWLYVWVTVAAALATVGNGSIFQSC EK IETKGTILTLDIEGCPNTENVCVLKRGVDTKIALTFTP<br>EVEMNNITVKVFGVIENIPVPIPHSNACIKSGLECPLEKGV PATYTQTFPVPKVFP SIFLIKWT<br>FVDSFNNELICALIPTRLQ                                                                                                  |

|                                                                                                                                                                                                                                                                                         |
|-----------------------------------------------------------------------------------------------------------------------------------------------------------------------------------------------------------------------------------------------------------------------------------------|
| >Dm1<br>MLRYAVIACAALVVFAGALEFSDCGSKTGKPTRVAIEGCDTTKAECILKRNTTVSFSIDFALAE<br>ATAVKTVVHGKVLGIEMPFPLANPDACVDSGLKCPLEKDESYRYTATLPVLSYPKVSVLVKW<br>ELQDQDGDADIICVEIPAKIQ                                                                                                                     |
| >Dm2<br>MKLSLGLFVIFAALIGFTSSTDVVSQCPKSKSKALAAGDVSISNCPKSKCILKRNTEASIQMKIRPE<br>RDFQELTSDIQGIILDVPLPFPYGYGTSACPHIYDEAGEKKVGCPLKAGQVYTYKNSFKILPVYP<br>TVSLEIHWGLGDKHGDAACFQIPAKIKA                                                                                                        |
| >Dm3<br>MLRPSSLQAVAIIVLISSASAEVNFEPDPSVDTCTIQQVRVSPCPEALNNAACNIRRKHNSE<br>MSFDFTPNFDADTLVASLGWAKSENVELPLLTLSAACKYTPCPVRSVGVKQTYTTLVPIEAKFP<br>LSPYTIRWALKDPVSQKRCCFTIDIKVVR                                                                                                             |
| >Dm4<br>MLRIVVTLALILATVNATNVQQCKNKPFLDVNIKDCEEPPCVVYKGTIAVMEVHFLGNNNNI<br>KSITATTTAKVLGMNLPYALPDEVSDVCRNLLYGAICPIDKDEDVTYQFNFYVEPSFPEITADVT<br>VTLNDAQNEPITCFVVSCKIRKGATAAQMDGYLLDWTNPL                                                                                                 |
| >Dm5<br>MLRLSSLLPVAFALVLSVSAEIVNFQTCEDSVDSISISQVRVTPCPEANANAACHIRRRHRFTM<br>SFDFTPHFDADTLVASLGWAKSENVELPLLTMDQEACKYTTCPVRSVGTQTYTNNMPADARFP<br>LSPYTIRWALKDPVSQKRCCFTIDIKVVR                                                                                                            |
| >Dm6<br>MSSFKKLSLCLVLSIMWTSVADSTPIRQCADSNYPQPLMVQIDDCDALPCDLWKGTEAKIDIQF<br>VATRNMTMKLSAEVHLTSLGVTIPYDLEASRGVCSNLLHGAYCPLDAGEDVTYQLLLPVTTN<br>QPEVPTRELVRLDSDDENRVVSCFLADTRVKKPRSAV                                                                                                     |
| >Tm1<br>MFCSIAYYVSSVLIFVLADVAGLNGSSPPPKPRPTVPENQEFYRTLANTLDRYMDLISMPQ<br>VPSRYMRNDDHDPNKWIFEEDDDDYIRSYQVTSCPHERNPVVKYSNLRVHPDPLIFPGTIRITS<br>DIQVLEDVTEPITVQVRMRRRMVYFWMDLPCVAAYGSCLYENICDTTIKCPIFYELLGLPCGCP<br>IKKGNRTHNKAYDVPDVLPTWLTSGDYQVILKASSNNRPLFCVRFKLSVEGPDDRNRLLSFL<br>SKIR |
| >Tm2<br>MRTGVCQRQSTDGLSTIKSVAVENCKNSELCEWTKGRNHELKVITYTAPKNVETVKVLISG<br>LVGGAELPFPGLKRYICKTPGNENFCPQTAGQEYATITLPILSVFPKIETTAFVRFIDD<br>DAKSEAEKLGCFHMQIKLIDDPEAPKVERVDNQEDDE                                                                                                           |
| >Tm3<br>MALNRFVVLIALVAVGYASPFKSCDSKDGSLSLDIEGCPDDNYECILHKGDDAKISITF<br>TPNVNSNTVMAKAFGIIAGIPIPYAIPESNACLHGLVCPLKSGVVTKYSQTFPVQRTYPS<br>LALVKWMLIDDRGDAIVCAKIPVRLQ                                                                                                                       |
| >Tm4<br>MLRLSVIVFLAISAFGQQVVVPPKCAETGGGILKLLVSPCTAEPKVMKKGRNATLTFEY<br>IADQNSTTAVIDARVKAFGMKVPVPGIDTDLCKIISCPVKEGATYTAQITVPVPPKIPIKK                                                                                                                                                    |



|                                                                                                                                                                                                             |
|-------------------------------------------------------------------------------------------------------------------------------------------------------------------------------------------------------------|
| TTLEVKIIGDKGLSSCFTHPLFLK                                                                                                                                                                                    |
| >Tm5<br>MVSFNVPAIALAVALTIHQEVDGQRKLKSYTDCGRDTNTRVRVPSVIFGKLNVTLPGVDS<br>ELCGKHLKCPIKANELQDADIEVPVFKTYP                                                                                                      |
| >Tm6<br>MKRLGQTLICGFLCAQIVHLQKKVINDMQICGGNGVVQLVIVEPCSNEPCMFQRPQIK<br>VHIEAGFDRPSETAKLSASAMVKSRNLTLPVNNLCRLTSCPLNNGRDIRNLSFTVPIK<br>SFYPPGTYESFVASGDDGMEICRRLNVTIITDQ                                       |
| >Isc1<br>SPLHTTTDAMARHLLPGTLLLAALCGLTEAIKWTDGCSSEGQVASVSVTGCEHTDTCNLK<br>KGTDVSLIIDFTSNVKSPVQVKAYGVLEHVPIPFDPQDACQSGVTCVPQAGKYNR<br>GSFPIKMPYPSISLDIKWELLDDKDQYLVCVLIPVKID                                  |
| >Isc2<br>MAASLRLELLALVVTRLMAIFEASEFTVVDYTTGGEALQVRVDPCEQLPCSFKKGRSVK<br>IEMDFAASKNQSQVSVGIMGKAGGMLLPLPNQKDGCKGSLDCPLVAGRNYTVSRAVRV<br>YRIYPMELAVFEIRGNDGEVLACVQFPVHIQ                                       |
| >Isc3<br>MGEKPLFKQLFFTSQHHSSRDILTFIMAGSMVFFALCAFAFVSAATAADALSVVKVDQCT<br>DGSTKNVKEVRMTHCESLPCNVKLADKPRFEVDVFAERDSNVMRVKVQGGIGALNPENFP<br>GFKSDACSNMGVECLVAGKQYTAQSQTMSPTFPPTQAKAIFKGVDAAGGELFCFTVPVE<br>LKQ |
| >Isc4<br>MNRLCYAASLVLSAALVSAEFDVVKHEKCGGEFGEVRIDPCPELPCIFKKGTPKLQVDFVAA<br>DSFKTLQMKLLGELSKGVWLPFPNFRNACKKNGLTCPLESGKPYTLQSTLNLSSFPVTRGS<br>RGVYMKGDNQTIFCFLVPVKVSD                                         |
| >Isc5<br>MQHHFEAALLVCVIALLGQCSAIWKSCNADNGQVLDMRVTPGGDREVYILRKGTVNLNIEF<br>WSSVDSGSAKVRAGHMVMGVPIPLKMPNEDACVDCGISCMPMRNGEKYLYKQGFVKAQYPK<br>MSATIKWALGDDNGGTVACVLIPVEIVD                                     |
| >Isc6<br>MASSVVLALAVVVCAGFVVGDLVAFKDCGHGNVKSVNIVSCKKAPCKVKIGTRVVFEASFVA<br>PFDVTSAFNDIGAYIERHRFRLPEPRVDACNGYLSRPCMRKGQTYTYRYTMPVREIYPATPATI<br>EYKLTNEEGRLIGCTSIPVQIFR                                      |
| >Isc7<br>MPGAVIQSLIVTPCTSDPCVIPVGTQINITFEVESNQSDRVLDFPRVTVLGVQLPIPGVEKDADR<br>SGAVVCPVHKGLFAGTISAYVYNFVPSLTVTTTWKMGVGAQGIIACGATNVTIVRK                                                                      |
| >Isc8<br>FLPTAGGDVTHVRVQPCTHEPCSIKRGTVLIEVPFRANQSDKCLKISAQLEDLELPLSLKK<br>DGCREQGIRCPLEKNEKYVFTYSLLLIYLLFQLNNTAKLSLTGAKGVVFCVTFPVNLTD                                                                       |
| >Isc9<br>MSIILFSTDQNSAKLSTKISAVIDNKNELVLPVSKRNTCRNQGIKCPLEQGTDYVFEYNLEIKPSF<br>PTLDTTAKLNITGAEGPVFCVTFPIHLVE                                                                                                |
| >Isc10                                                                                                                                                                                                      |

|                                                                                                                                                                                                |
|------------------------------------------------------------------------------------------------------------------------------------------------------------------------------------------------|
| MLSTRNMVLLAGSALALLLVVPACVRGQDAPGEPFRNFYNCTWAKGDPGEQAQAYLGGCG<br>SEEICPLYRGSEAKLELQFSRSDTSGVFRRIFGLFDKVLVPYGREVNVCNSTTSIDDNVRCSEES<br>HGLRQGRLYRHSGAFLVKPFFPKVQLNVTVYLYDKSPQKVPVACVQIPVQIKDKDRS |
| >Isc11<br>MRDSDVMRLKVQGQIGQLQPENFPFGKSDACSQMGVECPLVAGKQYTAKSQLTMSPTFPPTQ<br>AKAIFKGVDAAGELFCFTVPVELKQ                                                                                          |

**Table S6:** Protein sequences of NPC2 used to construct motif analysis.

| Accession number      | E-value | organism                       | Abbreviated name |
|-----------------------|---------|--------------------------------|------------------|
| <b>XP_022652195.1</b> | 2e-31   | <i>Varroa destructor</i>       | Vd1              |
| <b>XP_022649311.1</b> | 5e-128  |                                | Vd2              |
| XP_022654520.1        |         |                                | Vd3              |
| XP_022654596.1        |         |                                | Vd4              |
| gi_283753684          |         |                                | Vd5              |
| NP_608637.1           | 5e-104  | <i>Drosophila melanogaster</i> | Dm1              |
| NP_650331.1           | 2e-113  |                                | Dm2              |
| AAN71436.1            | 2e-112  |                                | Dm3              |
| ADL59625.1            | 6e-120  |                                | Dm4              |
| NP_001247376.1        | 1e-112  |                                | Dm5              |
| OQR69913.1            | 0.0     | <i>Tropilaelaps mercedesae</i> | Tm1              |
| OQR78448.1            | 6e-114  |                                | Tm2              |
| OQR69614.1            | 1e-103  |                                | Tm3              |
| OQR72593.1            | 4e-98   |                                | Tm4              |
| OQR76180.1            | 8e-61   |                                | Tm5              |
| EEC00381.1            | 5e-112  | <i>Ixodes scapularis</i>       | Isc1             |
| EEC07080.1            | 2e-108  |                                | Isc2             |
| EEC07323.1            | 4e-132  |                                | Isc3             |
| EEC03680.1            | 9e-106  |                                | Isc4             |
| XP_002435260.1        | 1e-108  |                                | Isc5             |
| EEC08723.1            | 6e-106  |                                | Isc6             |
| EEC06676.1            | 1e-82   |                                | Isc7             |
| EEC13424.1            | 2e-85   |                                | Isc8             |
| EEC13423.1            | 3e-63   |                                | Isc9             |
| EEC18444.1            | 6e-134  |                                | Isc10            |
| EEC16220.1            | 9e-57   |                                | Isc11            |

|  |
|--|
|  |
|--|

|                                                                                                                                                                                                              |                                                                                    |
|--------------------------------------------------------------------------------------------------------------------------------------------------------------------------------------------------------------|------------------------------------------------------------------------------------|
| >DgalNPC2-1                                                                                                                                                                                                  | GAIF01015586.1 lc ORF7                                                             |
| MANNFFFLIVASLALTAYAGELVQINNPVQCDGLTTIKAVYVEDCTNGEMCDLVKGHNYSKIT<br>YTAPKDVQTAKALVTGVIGGAELPFPGLQRYVCKTPGNEDFCPQVKGKDYTVSMVLPIMSLFP<br>KLETTATVRFIDDDAKSEAEKLGCFQLPIRLVDDPNAPKQPTRVDNEDDDE                    |                                                                                    |
| >DgalNPC2-2                                                                                                                                                                                                  | GAIF01031731.1 lc ORF2                                                             |
| MANNFFFLIVASLALTAYAGELVQINNPVQCDGLTTIKAVYVEDCTNGEMCDLVKGHNYSKIT<br>YTAPKDVQTAKALVTGVIGGAELPFPGLQRYVCKTPGNEDFCPQVKGKDYTVSMVLPIMSLFP<br>KLETTATVRFIDDDAKSEAEKLGCFQLPIRLVDDPTPLSSRRALTKTTMSNERQRDDAT            |                                                                                    |
| >DgalNPC2-3                                                                                                                                                                                                  | GAIF01008081.1 lc ORF7                                                             |
| MANNFFFLIVASLALTAYAGELVQINNPVQCDGLTTIKAVYVEDCTNGEMCDLVKGHNYSKIT<br>YTAPKDVQTAKALVTGVIGGAELPFPGLQRYVCKTPGNEDFCPQVKGKDYTVSMVLPIMSLFP<br>KLETTATVRFIDDDAKSEAEKLGCFQLPIRLVDDPTPLSSRRALTKTTMSNTSARDDAT            |                                                                                    |
| >DgalNPC2-4                                                                                                                                                                                                  | GAIF01004272.1 lc ORF7                                                             |
| MISQRIVVLPLIVAVLAVAVHGSYKLCCKTPSIGTVVKVIEGCSDDVQSCVLRKGTEAKLSLTFI<br>PNVDVKSVAKAYGLIAGVPVPYPLKNSDACKDSGLSCPLKDPKVTYKQAFDVMKEFPSMS<br>LTVKWVLRDEQNAHIVCPDTCQTGVVARREFWTVWTQVSSRPLRKGCVAVGDKNVAFRPV<br>YFAVKLQ |                                                                                    |
| >DgalNPC2-5                                                                                                                                                                                                  | GAIF01014813.1 lc ORF6                                                             |
| MPRFTATTA AAVVIAAIVLLSASPSVLGQREITFTPDDPGKIVKRV TATPCDTPCELKKGSM<br>TSFNFEFIADQNTTSITLDARVRVLGIFIPVPIETDMCRVIDCPVVKQEIVGQFNATVPRVPKS<br>SVIRVKVIGDEGMSCCISYKVVVK                                             |                                                                                    |
| >DgalNPC2-6                                                                                                                                                                                                  | GAIF01031088.1 lc ORF3                                                             |
| MAPKRGLRRVA AVPAERALATIVVLA AVCVAIVRGSPFKSCGGS AKITAVDIENC PSSAKSCTVH<br>KGA AFKVQVTFKPAKDAVNATLHKAVIINNVT KKLTPCVSVCNAGLKCPLHKNVPATLQYTGH<br>VPKDSPKGLFGQLSLTDSAGSLILCAQSPIEVA                              |                                                                                    |
| >Vd1                                                                                                                                                                                                         | XP_022652195.1 epididymal secretory protein E1-like [Varroa destructor]            |
| MKTFLVIFALAAIAIASPFTSCNHSQGTIRTVEISGCKDTPYCVLYKGTNVNLSITFVPASDASR<br>VTVEVYGLISGFIPYPLNSNACARGLICPLKNGETATYKHSFPVRNGFPSIALDVIWTLFDER<br>KNRIICARFPVVIQ                                                       |                                                                                    |
| >Vd2                                                                                                                                                                                                         | XP_022649311.1 epididymal secretory protein E1-like [Varroa destructor]            |
| MLRFVMLAAIASAAYAGELYKVQNVQQCDGLSTIKSVEVENCTKEDLCELIRGHNHLLRVTYV<br>PPRSAQVVKVLITGFVGEAELPFPFKRYVCKTPGNENFCPQTAGQEYTTMVLPILSVFPNIET<br>TAFVRFIDDDAKSEAEKLGCFSMKIRLIDDPNASTEPANVDNQEDDE                        |                                                                                    |
| >Vd3                                                                                                                                                                                                         | XP_022654520.1 uncharacterized protein LOC111247622 [Varroa destructor]            |
| MTSVTQSALIIILVVVTTWPWASFARKVQYQECNPKRNIKMMDVDNCDVQPCRVFHRTTIKMT<br>TQLSSPINSSSAEWEIRAFVNGRPYGHPEPVSDACLFVNSTSPNAFSSSHRTPLNSDQFKSGPST<br>AYRQKSFLPMCPLFAGKIYRFSNVFYVHDQFPKVATTIQYLLRGDNDEMIACARLHILMSS        |                                                                                    |
| >Vd4                                                                                                                                                                                                         | XP_022654596.1 epididymal secretory protein E1-like isoform X1 [Varroa destructor] |
| MMLLDLFTVVFAVMLMMNENNAKQLDSYVNCGGTGHENITVVPCESEPCEFAKGSKNVNH<br>FIGSFSDANSVRVQPSVIVDKMNVTLTGVDQELCGKHVQCPIKANELRDAEIEIPIFNVPNIK                                                                              |                                                                                    |

|                                                                                                                                                                                                                                                                                        |
|----------------------------------------------------------------------------------------------------------------------------------------------------------------------------------------------------------------------------------------------------------------------------------------|
| TEVVMIFSENVLQFCVVRTKIIISDKK                                                                                                                                                                                                                                                            |
| >Vd5 gi_283753684<br>MWLYVWVTVAAALATVGNISIFQSCEKIETKGTILTLDIEGCPNTENVCVLKRGVDTKIALTFTP<br>EVEMNNITVKVFGVIENIPVPIPHSNACIKSGLECPLEKGV PATYTQTFFPKVFP SIFLIKWT<br>FVDSFNELICALIPTRLQ                                                                                                      |
| >Dm1<br>MLRYAVIACAALVVFAGALEFSDCGSKTGKFT RVAIEGCDTTKAECILKRNTTVSFSIDFALAE<br>ATAVKTVVHGKVLGIEMPFPLANPDACVDSGLKCPLEKDESYRYTATLPVLSYPKVSVLVKW<br>ELQDQDGDADIIICVEIPAKIQ                                                                                                                  |
| >Dm2<br>MKLSLGLFVIFAALIGFTSSTDVVSQCPKSKSKALAAAGDVSISNCPKSKCILKRNTEASIQMKIRPE<br>RDFQELTSDIQGIILDVPLPFPGYGT SACPHIYDEAGEKKVGCPLKAGQVYTYKNSFKILPVYP<br>TVSLEIHWGLGDKHGDAACFQIPAKIKA                                                                                                      |
| >Dm3<br>MLRPSSLQAVAIIVLISSASAEVNFEPDSDVTCTIQQVRVSPCPEALNNAACNIRRKHNSE<br>MSFDFTPNFDADTLVASLGWAKSENVLP LLTDSAACKYTPCPVRSVKQTYTTLVPIEAKFP<br>LSPYTIRWALKDPVSQKRCCFTIDIKVVR                                                                                                               |
| >Dm4<br>MLRIVVTLALILATVNATNVQQCKNPFPLDVNIKDC EEPCCVVKGTIAVMEVHFLGNNNNI<br>KSITATTTAKVLGMNLPYALPDEVSDVCRNLLYGAICPIDKDEDVTYQFNFYVEPSFPEITADVT<br>VTLNDAQNEPITCFVVSCIRKGATAAQMDGYLLDWTNPL                                                                                                 |
| >Dm5<br>MLRSLLPVAFALVLSVSAEIVNFQTCEDSVDSISQVRVTPCPEANANAACHIRRRHRFTM<br>SFDFTPHFDADTLVASLGWAKSENVLP LLTMDQEACKYTTCPVRSVGTQTYTNNMPADARFP<br>LSPYTIRWALKDPVSQKRCCFTIDIKVVR                                                                                                               |
| >Tm1<br>MFCSIAYYVSSVLIFVLADVAGLNGSSPPKPRPTVPENQEFYRTLANTLDRYMDLISMPQ<br>VPSRYMRNDDHHPNKWIFEEDDDDYIRSYQVTSCPHERNPVVKYSNLRVHPDPLIFPGTIRITS<br>DIQVLEDVTEPITVQVRMRRRMVYFWMDLPCVAAYGSCLYENICDTTIKCPIFYELLGLPCGCP<br>IKKGNRTHNKAYDVPDVLPTWLTSGDYQVILKASSNNRPLFCVRFKLSVEGPDDRNRLLSFL<br>SKIR |
| >Tm2<br>MRTGVCQRQSTDGLSTIKSVAVENCKNSELCEWTKGRNHELKVITYTAPKNVETVKVLISG<br>LVGGAELPFPGLKRYICKTPGNENFCPQTAGQEY TATITLPILSVFKIETTAFVRFIDD<br>DAKSEAEKLGCFHMQIKLIDDPEAPKVERVDNQEDDE                                                                                                         |
| >Tm3<br>MALNRFVVLIALVAVGYASPFKSCDSKDG SILSLDIEGCPDDNYECILHKGDDAKISITF<br>TPNVNSNTVMAKAFGIIAGIPIPYAIPESNACLHGLVCPLKSGVVTKYSQTFPVQRTYPS<br>LALVKWMLIDDRGDAIVCAKIPVRLQ                                                                                                                    |
| >Tm4<br>MLRLSVIVFLAISAFGQQVVVPKKAETGGGILK KLVVSPCTAEP CVMKKGRNATLTFEY<br>IADQNSTTAVIDARVKAFGMKVPVPGIDTDLCKIISCPVKEGATYTAQITVPVPKPIPIK<br>TTLEVKIIIGDKGLSSCFTHPLFLK                                                                                                                     |
| >Tm5                                                                                                                                                                                                                                                                                   |

|                                                                                                                                                                                                             |
|-------------------------------------------------------------------------------------------------------------------------------------------------------------------------------------------------------------|
| MVSFNVPAIALAVALTIHQEVDGQRKLKSYTDCGRDTNTRVVRPSVIFGKLNVTLPGVDS<br>ELCGKHLKCPKANELQDADIEVPVFKTYP                                                                                                               |
| >Isc1<br>SPLHTTTDAMARHLLPGTLLLAALCGLTEAIKWTDGSGSEGQVASVSVTGCEHTDTCNLK<br>KGTDVSLIIDFTSNVKSPTVQVKAYGVLEHVPIPFVDPQDACQSGVTCPVQPAGKYNR<br>GSFPIKPMYPSISLDIKWELLDDKDQYLVCVLIPVKID                               |
| >Isc2<br>MAASLRLELLALVVTRLMAIFEASEFTVVDYTTTCGGEALQVRVDPCEQLPCSFKKGRSVK<br>IEMDFAASKNQSQVSVGIMGKAGGMLLPLFNQKDGCKGSLDCPLVAGRNYTVSRAVRV<br>YRIYPKMEILAVFEIRGNDGEVLACVQFPVHIQ                                   |
| >Isc3<br>MGEKPLFKQLFFTSQHHSSRDILTFIMAGSMVFFALCAFAFVSAATAADALSVVKVDQCT<br>DGSTKNVKEVRMTHCESLPCNVKLADKPRFEVDFVAERDSNVMRVKVQGGIGALNPENFP<br>GFKSDACSNMGVECPVAGKQYTAKSQLTMSPTFPPTQAKAIFKGVDAAGELFCFTVPVE<br>LKQ |
| >Isc4<br>MNRLCYAASLVLSAALVSAEFDVVKHEKCGGEFGEVRIDPCPELPCIFKKGTPKLQVDFVAA<br>DSFKTLQMKLLGELSKGVWLPFPNFRNACKKNGLTCPLESGKPYTLQSTLNVLSSFTVRGS<br>RGVYMKGDNQTIFCFLVPVKVSD                                         |
| >Isc5<br>MQHHFEAALLVCVIALLGQCSAIWKSCNADNGQVLDMRVTPGGDREVYILRKGTVNLNIEF<br>WSSVDSGSAKVRAGHMVMGVPIPLKMPNEDACVDCGISCPMRNGEKYLYKQGFVKAQYPK<br>MSATIKWALGDDNGGTVACVLIPVEIVD                                      |
| >Isc6<br>MASSVVLALAVVVCAGFVVGDLVAFKDCGHGNVKS VNIVSCKKAPCKVKIGTRVFEASFVA<br>PFDVTSAFNDIGAYIERHRFRLPEPRVDACNGYLSRPCMRKGGTYTYRYTMPVREIYPATPATI<br>EYKLTNEEGRLIGCTSIPVQIFR                                      |
| >Isc7<br>MPGAVIQSLIVTPCTSDPCVIPVGTQINITFEVESNQSDRVLDFPRVTVLGVQLPIGVEKDADR<br>SGAVVCPVHKGLFAGTISAYVYNFVPSLTVTTTWKMGVGAQGIIACGATNVTIVRK                                                                       |
| >Isc8<br>FLPTAGGDVTHVRVQPCTHEPCSIKRGETVLIIEVPFRANQSDKLATKISAQLEDLELPLSLKK<br>DGCREQGIRCPLEKNEKYVFTYSLLLIYLLFQLNNTAKLSLTGAKGVVFCVTFPVNLTD                                                                    |
| >Isc9<br>MSIILFSTDQNSAKLSTKISAVIDNKNELVLPVSKRNTCRNQGIKCPLEQGTDYVFEYNLEIKPSF<br>PTLDTTAKLNITGAEGPVFCVTFPIHLVE                                                                                                |
| >Isc10<br>MLSTRNMVLLAGSALALLVVPACVRGQDAPGEPFRNFYNTWAKGDPGEQAQAYLGGCG<br>SEEICPLYRGSEAKLELQFSRSDTSGVFRRIFGLFDKVLVPYGREVNVCNSTTSIDDNVRCSEES<br>HGLRQGRLYRHSGAFLVKPFFPKVQLNVTVYLYDKSPQKVPVACVQIPVQIKDKDRS      |
| >Isc11<br>MRDSDVMRLKVQGGIGQLQPENFPFKSDACSQMGVECPVAGKQYTAKSQLTMSPTFPPTQ<br>AKAIFKGVDAAGELFCFTVPVELKQ                                                                                                         |

**Table S7.** Protein sequences of SNMP used to construct phylogenetic tree.

| Long name             | Organism                       | Abbreviated name               |
|-----------------------|--------------------------------|--------------------------------|
| TRINITY_DN24266_c1_g1 | <i>Varroa destructor</i>       | Var24266                       |
| TRINITY_DN24854_c0_g1 |                                | Var24854                       |
| TRINITY_DN26930_c0_g1 |                                | Var26930                       |
| TRINITY_DN27012_c0_g1 |                                | Var27012                       |
| TRINITY_DN29484_c0_g1 |                                | Var29484                       |
| TRINITY_DN30020_c0_g1 |                                | Var30020                       |
| TRINITY_DN30199_c0_g1 |                                | Var30199                       |
| Q7KVF1                | <i>Drosophila melanogaster</i> | DmQ7KVF1                       |
| Q9W0X0                |                                | DmQ9W0X0                       |
| A0A0B4LGP3            |                                | DmLGP3                         |
| CRQ                   |                                | DmCRQ                          |
| Q9VM10                |                                | DmQ9VM10                       |
| PESTE                 |                                | DmPESTE                        |
| A8JN13                |                                | DmA8JN13                       |
| R9PY22                |                                | DmR9PY22                       |
| SNMP2                 |                                | DmSNMP2                        |
| Q961K6                |                                | DmQ961K6                       |
| Q8INY3                |                                | DmQ8INY3                       |
| Q9VLU7                |                                | DmQ9VLU7                       |
| H1UUH0                |                                | DmH1UUH0                       |
| Q9VJA7                |                                | DmQ9VJA7                       |
| M9MRL5                |                                | DmM9MRL5                       |
| A0A0B4KGL9            |                                | DmKGL9                         |
| Q8SYC3                |                                | DmQ8SYC3                       |
| Q9VET1                |                                | DmQ9VET1                       |
| Q9W0X1                |                                | DmQ9W0X1                       |
| A0A1V9XAB4            |                                | <i>Tropilaelaps mercedesae</i> |
| A0A1V9XVQ6            | TrpXVQ6                        |                                |
| A0A1V9X7A6            | TrpX7A6                        |                                |
| A0A1V9XVL0            | TrpXVL0                        |                                |
| A0A1V9XA72            | TrpXA72                        |                                |
| A0A1V9WZC0            | TrpWZC0                        |                                |
| A0A1V9XN95            | TrpXN95                        |                                |
| A0A1V9XQP1            | TrpXQP1                        |                                |
| A0A1V9XHA3            | TrpXHA3                        |                                |
| A0A1V9XPJ7            | TrpXPJ7                        |                                |
| A0A1V9XQK1            | TrpXQK1                        |                                |
| A0A1V9XQS8            | TrpXQS8                        |                                |
| B7PC41                | <i>Ixodes scapularis</i>       |                                |
| B7Q461                |                                | IscQ461                        |
| B7QI62                |                                | IscQI62                        |
| B7PD82                |                                | IscPD82                        |
| B7Q458                |                                | IscQ458                        |
| B7P9A7                |                                | IscP9A7                        |

|                                                                                                                                                                                                                                                                                                                                                                                                                                                                                                                                                                                                                                  |
|----------------------------------------------------------------------------------------------------------------------------------------------------------------------------------------------------------------------------------------------------------------------------------------------------------------------------------------------------------------------------------------------------------------------------------------------------------------------------------------------------------------------------------------------------------------------------------------------------------------------------------|
| <p>&gt;DgalSNMP-1    Icl ORF3    GAIF01013616.1    GAIF01013616.1:1-930 +    <u>PF01130.21</u><br/> 0.5, 0.38, 0.36, 6.48, 32.29, 0.7</p> <p>MEAISALNSEESKKGKFLAIDKNETEPGIFNMYTGATGVTDLNRIYSVNNQHELHIWPTTEHDN<br/> VCNQVDGTFGYLRPPMNETNEQVVFVPMCRPITIHYQKDVTFHGIRLRRFTLTPEFFSSKQK<br/> PENFCYDSKMKMPSGVAEVGPKQAGAPILMSMPHFMHADPSFSEKVKGMTPDIEKHTFTMDH<br/> EPTTGMTVAVRGRLQANIAVRPVDLLGADDLPTVVMPLFWQDMYVEAGPGVVAFLKKVLG<br/> YPGLAKIGLVILLVGLIVLFIGAGLLINYSRRVRQTG</p>                                                                                                                                                           |
| <p>&gt;DgalSNMP-2    Icl ORF1    GAIF01030464.1    GAIF01030464.1:1-1157 +    <u>PF01130.21</u><br/> 0.19, 0.2, 0.05, 1.96, 4.9, 0.1</p> <p>MGVVSYYTTFPSILEQQVNANLVIDPSNEVYESWKESPIPIYAKMYLNFYTNPNVEIEGERPKLQ<br/> QLGPFVYRERRHKVNITFNGNGTVSYRQVVSYEFLPHLSRGTLDLDDSLYTLNVPLIGTAYRNRK<br/> YLPDEQEPMAASMEEAQMYNQSLIHRKVRELLFEGYEDPMLRIAKTMGWSPPSFRFGYQIGR<br/> NNSNDGLYTIFTGSNGMDKYGTVESWQGRQKVTGFRKFCNFVNGTSGEMWPPYTHTTSHL<br/> NFFAPALCRSLRDLFLRNETVKGIRVRASRESVVTAPSQSSKSLAVRIAGHLRHFVFSHFKID</p>                                                                                                                              |
| <p>&gt;DgalSNMP-3    GAIF01028952.1    GAIF01028952.1:1-882 +    <u>PF01130.21</u> Icl ORF1<br/> 0, 0.2, 0, 0, 0, 0</p> <p>MDFNGDRNLDYYMNSQCSVSGTNGQIFPSFYATPAQVTVFFPFLCKPWTLRSYKHFILQGDEEI<br/> VRFIADKATFLRESTSDKCVNWKPTGISGLFDASNCHLDNKVGNFVNYFAPVLSWPHFLHAD<br/> VKLHDDVHGLRPESRKHEFFIDVHSRSGVTVDMRLRYQVNVRLYPSRIMEATIPKIMFPIYWQE<br/> IA</p>                                                                                                                                                                                                                                                                                |
| <p>&gt;DgalSNMP-4    Icl ORF1    GAIF01014656.1    GAIF01014656.1:1-610 +    <u>PF01130.21</u><br/> 2.42, 3.98, 4.08, 5.09, 5.72, 2.98</p> <p>MSKRYADYDLKMYTMPVVLSLPHFLHGDPLLLANISGLHPDEERHRFYIDVHAGSGLTVDMR<br/> FRFQVNMRLVPLETEQVPSIIFPIFWIEDANLPSDRNKLVLHILRKSSVVRWSALAAACLCLLATS<br/> LMCGLLL</p>                                                                                                                                                                                                                                                                                                                            |
| <p>&gt;DgalSNMP-5    Icl ORF20    GAIF01027311.1    GAIF01027311.1:1-2641 +<br/> 7.55, 10.23, 6.79, 31.36, 42.21, 5.35</p> <p>MLNDTDDGYLTVYAGIDDATRSRRNFIVQWRSRETIPYYSGRCNRLWGQTQSCSLHSVVHHLQ<br/> TLAYFWRLYVGPGHCASTAHVWKTALSSCALLVSTYFHRRPAMMPLTASSWTAGRGACLMA<br/> PVNMAFPSSACRISSTLRKNFFRMSMDFNPTSRSITFISTSTRC</p>                                                                                                                                                                                                                                                                                                           |
| <p>&gt;Var24266</p> <p>MKLIRGKQKSAPFLNFLKMGVNAARGAGVICVVVGAFLVVLGAAVLINFTATFQFILSRKVVL<br/> SSTAQGFPIWRDVSDDLDTKTAWYFFNLNPEEFMQGTQPILQEVGPFWYKTILKKINIEFLDN<br/> KTVTFEEHREFEFDAENSVLPNTTRITMINVPVMSALQRLKPLGYFARLAVDPVIKAAIADQQL<br/> TANYSVAELTYDGVYNNLVALSKIKEGFLEAIFALNSKDNKKGKFGFVVDKHDPTTFNMFTGG<br/> TGVMDLNRIYSINHKHVLMSWPNIENTTCNIVDGTFGYLRPPMNESNEQKVYIPDMCRPVTIR<br/> YEKDVNTNGIRLRRFILGKENFYNREAEPANACYDEIYREPSGVAEAGPCKQAGAPILLSMPHFM<br/> HADPSFSEKVGIMNADPERHTFIMDHEPMTGMTVTVRGRQLQANFRVTQLDCLDGEKLPPELLM<br/> PLFWQELYVEAGPGIVAFHLKVLSSYPGLAKIALIIVLLLGHISIIGAGFLMNHSRRTRQTEQLNPT<br/> KYHKMATQEATRKEPELDQLV</p> |
| <p>&gt;Var24854</p>                                                                                                                                                                                                                                                                                                                                                                                                                                                                                                                                                                                                              |



MKSRGIAGLGISCAFFLVAACLSLLAYLKIPSFLQLAVSRSGLSPGSFAADLFSaipfDIRQNVYMF  
NITNSEDFFNGAKPRFKQLGPYIFRIGLRKQMTWSEGDLLTFRENrkFWFDADLSHGHLNDTV  
YTVDPIYAMAQEVIDELPEFLERLFRPLLKSRKVLFKHSVDELLYNGYSDSLAEHLIKPNLPV  
IGGKIGYLRafNDTDDGDITVFAGTNPFTKDKRNlitQWNHKKTipYYGDGCNGIWGANAELF  
PSFLSSPPAQIGVFLPLLCRPWSLHFNETRQENGIELARFATGLDIFSPSNSSQIEQCAQPAGWPR  
GVFDVRACQHSFPALISLPHFLHSDEKILDAVDGLTPNVTEHDFHLDIFPLLgIPVRPAIRAQINV  
RIWRHLDTsQSNnPPIVYPVLWQeIVLSESaisYLSTMIWYiILLPETTLRVILMLLTILSVSLAVS  
YAYTSFSKVSDEETESILASAEDSAASS

>Var26930

MCGGSFCQSELNkPGGHRSEASVGRCTPHLAVTCSLCIGLFFCVFGMVSYAAFGPILRQQVKA  
NLIIDPSNEVYENWKETPVPIYVSMFLFNYTNPDDIILGAKPKLQQLGPFVYRERRQKVNITFNG  
NGTVSYRQLLSYEHLPeLSASSLDVKLYTLNVPmIGAAYKNRKTpsNEEQPMASALEEMFSKM  
NQSLLIHRTVRELLFDGYEDQMLKLAKQWSWSPTTRFGYQIDRNNSNDGIYTVFTGENGMAN  
YGTIESWQGRHRVIGFRKSCSFINGTTGEMWPPYTLTSKSSLLFFTSPLCRSLRLDFLRNEVVKG  
IQVLRyHLNERLFDYSIEENQCFCSKkkGKDPECFPNGVLDLNAPIVVSPLHLLYASPSITEAVE  
GLSPDPQLHEFFMDVEPSMGIPLRVSAKVQMNVIDAFKYFKYFEMFETRkFLPTFWIETA AV  
VNDDFAFKIRLVVQDLGSYVSFASYAVVLIGLFIIMFTLGyVIAHTRRSRMGQPSPYGYSTIKM  
AEVVTGR

>Var27012

MILTGVPRWVAFIVFAASAVVFiLGVVGYyMVPSIIGAKVSQQMRLVENGSTLKRWANVAVPIY  
FSAFMFNITNPEEFANGeKpQVQeIGPYVYLQKRRKLITHIDRDVVtYkDYKSYHFLPEYSIGTP  
DDRlyALNVPLVAMDKLIGSKLPGDLAKSLLQPILEGLLEKHNEKLvvQRNVSEMLFDGYAVP  
MMNELSKLAAAFMPDTKLPAISNFGLFYnKNNTADQWFTVGTGAGEYPFATILEWNNHTSLD  
FWSRDNCNKINGTDGGQFSPFVRTDQKLfVFATDLCRSIYFEYEKNTQVKGVDTKRFTVPDAIF  
ASGKRQPENQCFCEAINRCHEGGVIPLSSCRKGAPVMLSAPHFYQGDakLVQDVAGLRPQKK  
YHETyLDVQTMtGLVLRAAKRLQINIDLKQSDLLYPLANVSSRVMPiAWVEERMEATGPMTD  
GLKEKLIFPQKMgVLISAAALGGAIGAIAAILVIVVRQAGTTRSakLQPSK

>Var30020

MPRHVLTISPVKTVSAEIERDPLERYNAMTADLQNGKQKEKTKTPSKCCCCSYKVCsLLLFIls  
FIMTVTAVVLQSQFDaffDRALKDQMHLGpsGLVFPawRVSDLRMRMRVYFFNITNPVEVQLG  
DKPILNELGPYTWRIYMEKFDIKFHENSTLSYREKKWYQFLREESIGGYNDIITTVNVPYAAVA  
QRLKDGGTVAKSTATFTLNGLGQTMHAKQVGELTFEGYPDFLILVANAVEAGKKEDSGFGTI  
LGTGLRIFTNVLAAEPDVQGSFGYFVDRNNTDDGIVTIFTGEDNRQKINRVNVVNGHTELTW  
PQHCKNKIKGTMGHLRPPMSSRENPLIFVPDICRSLPLRYENVSvyEGLSTLRFVAGRETFNNS  
GPDPCFAGSRKfKSGVMDIGPCKKGAPLVISFPHYLFADEAHQNSVIGLNPRKEAHQFYLESdp  
LTGVTVSVRARFQVGVMERVHGLGNLGTIFDGTIPLFWQELQLEALPPTVFQLSILRQLPIYA  
KQTALVLIGTAILISLIAVFLVYRYVHSTYVL

>Var29484

MKKSLLKNEliGVLCHTEENGLFTMCSGGQRLSEQEVRSdQRYDSAPTGCSPLLRVIISLCIGLLF  
CILGVVSYTTFAPILEQQVKANLVIDPSNEVFESWQEPpITINVKMYLFNYTNPekILAGLKPTV  
DELGPFVYRERRQKVNITFNGNGTVSYRQIVSYDFLPHLSVGNLDDELFTLNVPmIGSAYKNR

KALLNEESMMAHTIEELFEKHNQTFLIQRKVRELLFEGYQDPLLRVAKEMGWSSSTRFGYQVN  
RNSDDGIYTIYTGEEGMENYGTVDSDWGKKRVLAFRRSCSFINGTTGFTISSMTEFIQSTRGK  
KGWRTTARWIAGTARKGYSLSALRYHLSQRLFDYSIKENQCFCTKKKGGKDPECFPNGLLDLNR  
CQPDAPIVASLPHHLAASSVSEAVDGLSPDPELHEFFMDVEPTMGIPLRVSARLQLNVIVDAFK  
YFKQFQVFKKRVFLPTFWTETTAMINDDIAFKIRLVTEDLANYVTFAALAWVLIGLIVIICTFGY  
VIAYTRRSVRLIQKIYVDYNSIWDISNPDPSPFLKDRLVF

>Var30199

MGLKKSYYVVLISASLLVSFLGCIGILTLHPLFQTLLSHRLPLKPGSESYNGWKKVPFPIYQRFYY  
FNVTPNDEFNLFGEKPVLEEVGPYTWRSEWVKEAVEWHANGTLQYRERKRFWFDREQSAGD  
QEDVIFTINTPLVAASQKIRNASPLIKLAFLIFLNAANETLFIRRSIRQLTYEGYPDVLAHISHVIDP  
NVPVKDGRFAYMSGKNDTDEGLFNVTGSVDLRYFNRIDKWNGRTELPWWESGTPCAKLLG  
TNGELVHPIVSSDEHIYFFNPVFCKPWRLTRAPDVDSLGITLTRFVAGPEVLFNSSREPANRCFET  
PGKSLPSGGMDL SRCQFGLPLVLSYPHFYAADSKYLEKVEGLSPNQERHQFQIDIEPRLGITLGL  
SARAQINVKLERVDFLKYFRSVPFLVFPVFWQDVVIEQTPAFADHIRVLLDRPLFYAQFAFRFMT  
MCGSLVALGAYIYVVILAKKESKKDRFGPLLDDEEINEDEHGEGDVAEDSASGQSQGH

>DmQ7KVF1

MNGPKHKFCTKLSSTYLKWWITIVVAAALIIGGIVVACEFTVLIDAVVDRMVALRPGAK  
TFGWWAKPPVEPRISLYIYNVTNADDFLSNGSKAIVDEVGPYVYSETWEKVNIVENDNGT  
LSYNLRKIYSFREDLSVGPEDDVVIVPNIPMLSATSQSKHAARFLRLAMASIMDILKIKP  
FVQVSVGQLLWGYEDPLLKLAQDVVPKEQKLPYEEFGLLYGKNGTSSDRVTVNTGVDDIR  
RYGIIDNFNGRTHLPHWTTDACLNTLAGTDGSIFPPHIDHRILHVYDKDLCRLLPLVFEK  
EVMTSNEVPGYRFTPEWVVFADVDSHPDNMCFPCAGKPCSPNGLFNVSCLCQYDSPIMLS  
FPHFYLADESLRTQVEGISPPMKEKHQFFFDVQPKMGTTLRVRARIQINLAVSQVFDIKQ  
VANFPDIIFPILWFEEGIDNLPDEVTDLMRFAEQVPPKIRVALIVGLCALGVILLLLSTF  
CLIRNSHRQSTLHLEGSNYLATAQVDMNKKQNKDNQPARY

>DmQ9W0X0

MQLDDILHINNCKADCSSLSTPNPKTDLVNMNGPKHKFCTKLSSTYLKWWITIVVAAA  
LIIGGIVVACEFTVLIDAVVDRMVALRPGAKTFGWWAKPPVEPRISLYIYNVTNADDFLS  
NGSKAIVDEVGPYVYSETWEKVNIVENDNGTLSYNLRKIYSFREDLSVGPEDDVVIVPNI  
PMLSATSQSKHAARFLRLAMASIMDILKIKPFVQVSVGQLLWGYEDPLLKLAQDVVPKEQ  
KLPYEEFGLLYGKNGTSSDRVTVNTGVDDIRRYGIIDNFNGRTHLPHWTTDACLNTLAGTD  
GSIFPPHIDHRILHVYDKDLCRLLPLVFEKEVMTSNEVPGYRFTPEWVVFADVDSHPDN  
MCFPCAGKPCSPNGLFNVSCLCQYDSPIMLSFPHFYLADESLRTQVEGISPPMKEKHQFF  
FDVQPKMGTTLRVRARIQINLAVSQVFDIKQVANFPDIIFPILWFEEGIDNLPDEVTDLM  
RFAEQVPPKIRVALIVGLCALGVILLLLSTFCLIRNSHRQSTLHLEGSNYLATAQVDMNK  
KQNKDNQPARY

>DmLGP3

MQLDDILHRITIVVAAALIIGGIVVACEFTVLIDAVVDRMVALRPGAKTFGWWAKPPVEP  
RISLYIYNVTNADDFLSNGSKAIVDEVGPYVYSETWEKVNIVENDNGTLSYNLRKIYSFR

EDLSVGPEDDVVIVPNIPMLSATSQSKHAARFLRLAMASIMDILKIKPFVQVSVGQLLWG  
YEDPLLKLAKDVPKEQKLPYEEFGLLYGKNGTSSDRVTVNTGVDDIRRYGIIDNFNGRT  
HLPHTTWDACNTLAGTDGSIFPPHIDHDIRLHVYDKDLCRLLPLVFEKEVMTSNEVPGYR  
FTPPEWVFADVDSHPDNMFCPCAGKPCSPNGLFNVSLCQYDSPIMLSFPHFYLADES LR  
TQVEGISPPMKEKHQFFFDVQPKMGTTLRVRARIQINLAVSQVFDIKQVANFPDIIFPIL  
WFEEGIDNLPDEVTDLMRFAEQVPPKIRVALIVGLCALGVILLLLSTFCLIRNSHRQSTL  
HLEGSNYLATAQVDMNKKQNKDNQPARY

>DmCRQ  
MCCCKCCGETQRKVWVFGVGLSVFLLLILIVVFWPGIADNLVEDGLTLKPGTDAYESWLEA  
PIPIYLSFYMFNWTNPEDIRNPDIKPNFVEMGPYTFLEKHKKENYTFYDNATVAYYERRT  
WFFDPERSNGLTDDMVTAHAITATVADEMQRKIVKKIINFMLNHEGGKLYVTKPVGE  
WIFEGYQDNITDFLNLFNNTTKIDIPYKRFGLADRNESLTYDGLFTIHTGTDDISNLGRL  
THWNGKSETGFYEMPCGIVNGTTGDMFPPKMNVNDEITIFATDACRFMNLPRGTYENHG  
LTATKWWGTEETLDSGENYPNQACFCDEARFDECPKTGVVECKACRDKAPIYSSFPHFYL  
ADQSYVDAVSGMKPEKEKHEFFLAVEPITGVPVQVHGRIQINMMIEPDDDFDIYRGVQKV  
LMPMFWFDQYAELESSELASKAKLAINLSSYGIIFGYSMIAFASVFLITGITLTVTKKWVR  
RTPEDEDILT N

>DmQ9VM10  
MPTQNSAMWGWQKSNRKLIIIGIFGFCGLFGILCGMFWVDLFDWIMHKEMALAPDTRVYEN  
WKSPPIDLSLDIYLYNWTNPEDFGNLSTKPILEQVGPYRFIERPDKVDIHWHPENASVTY  
RRRSLFYFDAAGSNGSLDDEITLNAVALSAAATAKYWPPVKRSLVDVGLKMYGAEMS VQ  
KSIDELLFTGYNDAMIDVAMAMPIFGDEVKVPFDKFGWFYTRNGSADLTGVFNVFTGADQ  
LAKLGQMHSWNYQENTGFFDSYCGMTNGSAGEFQPQHLKPGDSVGLFTPDMCRTIPLDYV  
ETVDIEGLEGYKFSGGPRSDNGTQYPENLFCGGQCVP SGVMNISSCRFGSPVFMSPH  
FFNADPYYPDQVEGLSPNQKDHEFYMVVQPSTGIPLEVAARFQVNMLVEPIQGISLYTGI  
PRIFFPLVWFEQKVRITPDMADQLKVLPIVMLSGHIFAGICLIVGITLLCWTPVQILLAS  
CRNRRYDLRTKTKTNGQYKRSRQFSSAEELKSKASTLVCEKSVKGPSPDSSPLEKGRKPT  
IKSQTGESVATASTAISDNKQD

>DmPESTE  
MTRSRTRHCARLGIVLLGICCIASGIYLFNRNIDMFTRMRGQEMALSPNSRSFEGWKVSPL  
PLDFDIYLFNWTNPDDFYVGSNKKPHFEQLGPYRFREKPKVDIEWHNHNASVSFHKKSW  
FYFDAAGSNGSLWDKVTTVNSVAHSAARRAAVDWFARTGVNIANKLYRQGV TITKTVD E M  
LFGGYEHPFISVGKLLRPQDVYKRIQYHYPRNGSSEFDGDNMFTGADDIAKMGQIHTW  
NNLHTTGAFEGTCGQVHGSMGFEFFPNLGTKDTVYMYMPKMCRAIPLDYVETVTVHGVT A  
YKFSGTRHAVDNGTLYPDTRCYCVGGKCMPSGVINIGPCSFNASVYMSFPHFYMADPSYL  
EAIEGLRPEREKHEFFMALEPNAGVPMVGGGFQANYMEPIPGITLYENVPTVMIPMMW  
CEERVVSEEEAADIALVPLIVLLGQIVTGILLAGGLICTCWYPTRQVTHFCHSDPKAKA  
SVLRPLNAFGVNSSAATAPVAQLFRNNISSSGNERVGVRLLDYNRDSGIRLESGMTESH  
RERLISEDSPDVVVR

>DmA8JN13  
MGLEKHYLRYGRTARDHLLDWATCGRGRRQQQQQQQQQTHAQPSQGSTATGRRSRPHVTH  
RGTPLSMLISNGVRISNNRLAVIIIGIITLILGIISSMPWLDYFILKNLRLWNDT LSYH  
YWQRPGVIRLTKLYIYNVTNPDGFLRGEKPHLQEVGPFVYREDMQKVNVKFHENNYTVSY  
QHKKILQFVPELSIDKDTPIITPNIPLLTSLSPKLG YLLSKTISVVVTA AQFKPFIN V

TAEQLAFGYDDALVSLAHRFYPKHMRPMMERMGLLLGRNGTLTEVSSVKTGMDSMDQFGYI  
DQLNGLDHLPHWSEPPCTSIAGSEGSFFPPRELTKSEVVHIYDKDLCRIIPLKYVESLEK  
DGAADLFRPLNNSYGDSAHPENKCYDTSEYEPIQGLQNISPCQYGAPVYISNPHFFES  
HPDLLNSVEGLKPEREKHETYFKIQPKLGVPLEGKVRIQLNLKVTRAKDVYPVRDFRDFV  
FPVMWLEEGISELTPAIKRWIYLGTVIAPSAVPIGSYLMILGGAFAIIFSFRAYQNFMF  
AQDPTLEILEMGRRLRRGSSFIAHQHRLLVHHRDSYLLRHGPMATCLGEGNREEDAQ  
PIIDVSLSGGISQES

>DmR9PY22

MPWLDYFILKNLRLWNDTSLSYHYWQRPGVIRLTKLYIYNVTNPDGFLRGEKPHLQEVGPF  
VYREDMQKVNKVFHENNYTVSYQHKKILQFVPELSIDKDTPIITPNIPLLTLSLSPKLG  
YLLSKTISVVVTAQAQKPFINVTAEQLAFGYDDALVSLAHRFYPKHMRPMMERMGLLLGRN  
GTLTEVSSVKTGMDSMDQFGYIDQLNGLDHLPHWSEPPCTSIAGSEGSFFPPRELTKSEV  
VHIYDKDLCRIIPLKYVESLEKDGIAADLFRPLNNSYGDSAHPENKCYDTSEYEPIQGL  
QNISPCQYGAPVYISNPHFFESHPDLLNSVEGLKPEREKHETYFKIQPKLGVPLEGKVRI  
QLNLKVTRAKDVYPVRDFRDFVFPVMWLEEGISELTPAIKRWIYLGTVIAPSAVPIGSYL  
MILGGAFAIIFSFRAYQNFMAAQDPTLEILEMGRRLRRGSSFIAHQHRLLVHHRDSY  
LLRHGPMATCLGEGNREEDAQPIIDVSLSGGISQES

>DmSNMP2

MIHWSLIVSALGVCVAVLGGYCGWILFPNMVHKKVEQSVVIQDGSEQFKRFVNLQPQLNF  
KVYIFNVTNSDRIQGAIPIVEEIGPYVYKQFRQKKVKHFSRDGSKISYVQNVHDFDAV  
ASAPYTQDDRIVALNMHMNSVLQISENDPGLALLLVHLNANLKAUFNDPRSMFVSTSVRE  
YLFDGVRFCINPQGIKAICNQIKESGSKTIREKSDGSLAFSFFGHKNGSGHEVYEVHTG  
KGDPMRVLEIQKLDSDHNLQVWLNASSEGETSVCNQNINGTDASAYPPFRQRGDSMYIFSA  
DICRSVQLFYQTDIYQYGIPGYRYSIGENFINDIGPEHDNECFVDKLANVIKRNKNGCLY  
AGALDLTTCLDAPVILTLPMLGASNEYRKMIRGLKPDAKKHQTFVDVQSLTGTPLQGGK  
RVQFNMFLKSINRIGITENLPTVLMPAIWVEEIQNLNEMVAFFKKKLINTLKLTLNIVHW  
ATLCGGIGVAVACLIYYIYQRGRVVEPPVK

>DmQ961K6

MSHTKDAEMSMPARQESDRTSAPSVTKSLTLNSTRSGVGTGNFGGYGMTNGAEKPSVLHM  
IMEALGLRNQAQNREPTSKDIGTLIMLGMVFLFVISVTGFFVMWFTEYYNNTILENLIL  
AENS DTANSWLNPD PKYDTLLKAHIFHPNIDDYLAGRADKIKVVDVGPLTYQEHTVKDE  
VSFNKNFTVSFRDRKSYKFLPEKSSIGEHEVVRPNVPLISAAGPVKRMKA FERLAVSTW  
IKQFKEPLFKNLTVSEYLWGYEDSIIKLSLGRGRRRFGLLMSRNGTSVDSVQLNTGEDD  
ITKFSIITQFNQMPQLDYWEGDECNRIDGSEPSMFPHLLQDRSTVNVFLQVLCRKVPLH  
FEKEVTIYNDIDVLRYPMDVFSHPSKNPANQCYCQNTLCLPSGVINATKCYGDAPIF  
PSFPHFFT GDPVLYQDFEGIEPDAAVHQTYADIHPRFGFPISGASRVQINIMLDKTPILR  
NQGDRLKNTTILPLMWIEITSGDFSEEVLHTLYLSTFGLNAIQQLTKYGTLLISVTSFSL  
IVAGVYYLNSRREQQLQESKTSAELEALNGGENVIVVHHIDMPVPLPVQDGGIHQGT

>DmQ8INY3

MCCSCCGVTQQKAWVFG LGTFFAVSGLLAICWPGFIDSGIMKALPLTPTS KTFEKWEEL  
PIPVYVYMYLWNWNAADVQANGVKPIFAQLGPYVYREERKKMDLEWHDNGTVTFNPRRT  
WFWEELS GGKQTDLITAPHLPSLAASNQMRNSNVFLKFMFNEALNANGHLFVTHTAAE  
WLFESFYDEFLHYAMTLNPLVPKIESDHF AWFNLNRNGSKDFEGPFTVHTGVGDIKEMGE  
IKYWKQNHGTGWYDGE CGRLNGSTTDLFVPEPKEKALTIFIPDTCRIINLEFTGQSETI

QGITGWKYEITPNTFDNGQINGNAKCWCPLERQPDNCPATGATDLGPCADGVPMYLSADH  
FMYADESYGSTISGYNPNYDQNNFYIIMERKMGVPLKVNANVMITLYIEPDSVIDILKGL  
PSFYAPLFTTASRAEIDEALASELRLALNLPALIGRYTGVGFLCLGCILIAVGILLTIKRR  
WYGQAECLKLALKDNEETPYEPEVPANVVERNF

>DmQ9VLU7

MIGKQRIWQTSVLGLLASFSLSVLYMEQIERWMLEWFMVLRPGTMISSLWQSPAMDIN  
VDLYIFNWTNSEKFSIPTVKPRFEELGPYRFTERMQKVNVEWHDENSTVSYRRRSRFD  
PKLSVGRPTDPIVAPNLLIVGLYQKMVMWSPMLRSLMLLALNIYGKEQAMIRPASDWMFD  
GFDTPMIKMSKMVPPSLVPEMKFPYEKIGYAYPRNGSMEIYGHHNVYTGRDEFQKLGQIA  
RWRYNNVTEASPRCKLKSAGEFHPIPLVKGRPISYFLPDLCRELQVDYSGTTIFEGIDA  
FVYRGSARNMANGTDNPDNSCYCQDNCQEVRSGLLNISSCWYGTPVFASYPHFFKADPYY  
GEQVEGMKPKDRHEMVIMLEPKTGMVLEIKARIMANLLVEPKTHLIYRTARRTFFPLIW  
ADYNVRITDDLLVYVKLMPILEFVGKICGILGVVLGLLMVFWYPHQMIWQKSLMHKIEIS  
SIETNSSLEPVKNNDVEDSPLLKGLQYAAAKDGAGNGN

>DmH1UUH0

MIHWSLIVSALGVCVAVLGGYCGWILFPNMVHKKVEQSUVIQDGSEQFKRFVNLQPPLNF  
KVYIFNVTNSDRIQQGAIPIVEEIGPYVYKQFRQKKVKHFSRDGSKISYVQNVHFDFAV  
ASAPYTQDDRIVALNMHMNAFLQVFEREITDIFQGFANRLNSRLNQTGVRVLKRLMERI  
RGKRKSVLQISENDPGLALLVHLNANLKAFFNDPRSMFVSTSVREYLFQDGVRFQINPQG  
IAKAICNQIKESGSKTIREKSDGSLAFSFFGHKNGSGHEVYEVHTGKGDPMRVLEIQKLD  
DSHNLQVWLNASSEGETSVCNQINGTDASAYPPFRQRGDSMYIFSADICRSVQLFYQTDI  
QYQGIPGYRYSIGENFINDIGPEHDNECFVDKLANVIKRNKGLYAGALDITCLDAPV  
ILTLPHMLGASNEYRKMIRGLKPDAAKHQTFVDVQSLTGTPLQGGKRVQFNMFLKSINRI  
GITENLPTVLMPAIWEVEGIQLNGEMVAFFKLLINTLKTNLIVHWATLCGGIGVAVACL  
IYYIYQRGRVVEPPVK

>DmQ9VJA7

MRCGCCSVRQKQIWFVSMGGLILAIGIFLASAWPAVSRQWIRSLPLAPNSFIYNRWVTT  
PTPVYSTVFLFNWTPGDLNTEGVKPHFEQLGPYTFSDFKVKEDLEWNQPQVTFYFKRTW  
HFLPEKSNGLDDVVIAPHFPTLTAALYSRRLRRLRKVMNFTLNREGGATHMTHTAGQW  
LFDGYDDHLLDFVEQLHSPLLPVYDNTFGWFYERNNSKTAEGNFTLHTGRGDLSQLGDL  
LWNGENTTGFPYGECKVNGSTGELWSPYRTWDQPTTIFLPDAARYLNLFPKENLTIDGI  
DVWRYESTNLTIDNGQLSPDTECFCLKNRECPRNGVLDYGPFAFNGPFYMSHPHFFLTDQ  
MYRENTTGLQPEESEHGMVIMEPTLGIPLSLRGQLMISTKVVRDEAIDLKFNVAIDHYA  
PLFTMRLHAELDEGLTKLLKALNAAIIGMYTGIGLVLLGMSIVVTGIFITKHKWHSEQ  
RPDKHLQCTQN

>DmM9MRL5

MCCSCCGVTQKAWVFGVGLGTFFAVSGLLAIIICWPGFIDSGIMKALPLTPTSKTFEKWEEL  
PIPVYVYMYLWNWNAADVQANGVKPIFAQLGPYVYREERKKMDLEWHDNVTFTNPRRT  
WFWEELSGLKQTDLITAPHLPSLAASNQMRNSNVFLKFMFNEALNANGGHLFVTHAAE  
WLFESFYDEFLHYAMTLNPLVPKIESDHFAWFLNRNGSKDFEGPFTVHTGVGDIKEMGE  
IKYWKGNHTGWYDGEGRNLNGSTTDLFVPEPKEKALTIFIPDTCRIINLEFTGQSETI  
QGITGWKYEITPNTFDNGQINGNAKCWCPLERQPDNCPATGATDLGPCADGVPMYLSADH  
FMYADESYGSTISGYNPNYDQNNFYIIMERKMGVPLKVNANVMITLYIEPDSVIE

>DmQ8SYC3

MKEFSKMFARRYSSVSRDVEASNQRQSAVTPGSLSTADPAVSCAAQVALQRIQRRKSL  
KANRSMNPIDILSSFFNEPIQGKRNRVPTRLFILLVIGFLAIITSTLIKVLEPYDLIFKW  
KLIMTEGGEIFNLWAQPPVDLYIKIYLFNITNANAFLAGREQLRVEQVGPYVYKEIMTHE  
NVTFNSNNTMSSTPSHPLVWQEEMSGNCREDEDEVVMLNIAMLAISHLTANQPFLVRMALK  
TLLSTKSEPIVRTTAKEFMFGYPSALATLGNTFLPNWISFEKVGLIDRMDFSTDFETF  
YTGVPNPALSGLYASYRGETTLPQWDGDHCSNIEFASDGTKFKSFIQPNETVKFFRKS  
RPNLYRVGNEKTYGSLKGYNYVFEDNAFDNGATNEANKCFKRKGCDCQPVLIDVTD  
CYYGFPISLSFPHFMDVGLQQNVTGISPPDKHSSTFVIQPEGLPLSLSVKVQINMHFKD  
LSNFPVVSFVNHLTPMLWFEIMMSKLPDLSRNFYLNILPLVNPLGFWGILLGISL  
LGYAITKATLHMSTFSRRAANITDVKYVRANLIQNIAGEAANHAYSPCDIKLLDDISV  
VRHPVKNQTVQDSGFSSKTTYALDMEPALLDTSESSDEGRDCDIVTISRNSTSTRFC  
ADEKKCWLGDDIRVECFTESRAPQTILKREEQIH

>DmKGL9

MQVPRVKLLMGSGAMFVFAIYGWVIFPKILKFMISKQVTLKPGSDVRELWSNTPFPLHF  
YIYVFNTNPDEVSEGAKPRLQEVGPFVDFEWKDKYDLEDDVVEDTVSFTMRNTFIFNPK  
ESLPLTGEIIIILPHPIMLPGGISVQREKAAMMELVSKGLSIVPDAKAFKAKFMDLFF  
RGINVDCSSEEFSAKALCTVFTYGEIKQAKQVNQTHFLFSFMGQANHSDSGRFTVCRGVK  
NNKLGKVVKFADEPEQDIWPDGECNTFVGTDSTVFAPGLKKEDGLWAFTPDLCRSLGAY  
YQHKSSYHGMPSMRYTLDLGDIRADEKLHCFCEDEPEDLDTCPKGTMLAACVGGPLMAS  
MPHFYLGDPKLVADVDGLNPNKDHAVYIDFELMSGTPFQAAKRLQFNLDMEPVEGIEPM  
KNLPKLILPMFWVEEGVQLNKTYTNLVKYTLFLGLKINSVLRWLSLITFSLVGLMFSAYLF  
YHKSDSLDINSILKDNKVDVASTKEPLSANPKQSSTVHPVQLPNTLIPGTNPATNPA  
THHKMEHRERY

>DmQ9VET1

MKLFTNKNQRNAKLLRSAALGMTLLFFGSLVIISDPLQSILDTQLSLKPGTLLHRLWLLP  
PLDVYINVYMFNYTNVDEFTSGRASKLQLQEVGPYVYKEVLSNHNVTYNESNNTITYSPK  
REYVFAPERSVGDPKIDRIRAPNIPLMGVTTLASSLSMFAALGLSAITRQLNSQPMLEMS  
VHDYMWGYEDHLVELASRFVFNWIDFSSFGIMEKLFREGNESNVFNMNLPEPKDKYGM  
RMTDAPRGYTVDSINGERGFKGWQYNEETNGTMCNRIWGSHDATLFPDMDENDEFFLYRRT  
FCRRLPVKFNRTTTFNGLDAFEFVMEPDSFDSEVDNANSSCYCKNNRCLKKGVGNVSPCY  
YNIPLAITYPHFMHADPSLLEPFDGLQPNVSRFTSTFVVQPQLGAPMQGTHLRLQANQVV  
GKVNFNRMMPFENMILPLLWVDLNDVLCCLTLRLLIHGKIKWGFLLQWSAALGMLLAGV  
YQLCSALLLCFWPTARQFQKVDQVERGTAVQVIGVGLGLATGLRKPSIHLDPPEQHLL  
LLGGGSFIPKMAKT

>DmQ9W0X1

MKSVQVVKILLCLILACVNVFLFVVSWSGVDYRILVAREHIRFRQEMPTMDSWINS  
PFGKLNKYNVFNVTNAEEFRSGRDSRLKVKKEIGPIVYRIVGFNDILDRNETNVRYRKH  
RYRVVEFLPEESVAPDVLNWTITSTNNVILGAATKVKHTAPLAAFGFDAALMMEDIFV  
TDSVYYFLWETFTRPLLQTLRISNIRPNVAVLYNALKEKEEVYTVNIGPKRGIENFFRIE  
TLNGEVIIREQLPHTRQYDSNSCFNVSGALDNSLFPFVQPDTPLSIVAIESCRVLP  
LTYQRQERYNGLDTFRYTLLQSHQKPPGCLDTSYGVKLPDGMFDVVSQCVINDAPSAF  
SMPHFYGGSSYNWSQH YEGYTPNAEDHEPYILLEPVTGIPVTEKYRFQSNIPIDLR  
RFSSRLSRFSNMMIPSFWY EFEMGQLPGFVTSMLWINVNIVQHIQPYCMVLFV  
LALWSVLKAIRVACGDLGYVVLFRK

LCGDLGTVTALETKFQATSASPDVAVK

>TrpXAB4

MTTNVRNGKQKETPQTPGKCCGSSKVCSELLLILSFVMTLTAVLIHTQFDSFFDRALRD  
QMHLGPSGLVFPARVSDLRMRMRVYFFNITNPAEVQLGDKPVLTELGPYTWRIYMEKFD  
INFYKNNTLSYREKKWYEFLEESVGGYDDIITVNVPIYAAVAQRLKDSGTVTKSTATLT  
LSGLGQTIMHAKRVGELTFEGYPDILILVANAVETGRKEESGFGSFLGAGLRIFTNVLAA  
EPEVQGNFGYFVDRNNTDDGVMTIFTGEDDRQKINRVNVVNGQTELSTWPEQKCNKIRGT  
MGHIRPPMSPPSSPVVIFVPDICRTLPLHFENTS DY EGLTTLRFVAGSDTFNNSGPDPCF  
AGPRKLNGLMDIAPCKKGAPLVISPHYLYADEEHLHSVIGLNPRKEAHQFYLDSDPLT  
GVTVSVRARFQVGVVMERVHGLGNLGTMFVGNIPFWQELQLEALPPTVFQSLLRNLQP  
YAKHAALGLVGLAILTGLVAVILAYRDWRYGRSSATKVISITPDHHPHPIERTYHNHYENE  
DEVVKNRAGAIQDKEAQIQELEKRIRSEGHVGRSKAPPS

>TrpXVQ6

MVYGRSHVVICAGIAVAAFGVTGLLTLKGLFNALLSRRLPLEPGSESYDGWKKIPPIY  
QRFYYFNVTNPDQFLRSGEKIPILKEIGPYTWSEWVKEAVEWNANGTLQYRERKRFWFDR  
NNSVGDQDDVIVTINTPLVAASQKIRNASPLIKLAISIFLNAANETLFIKRSVRQLTYEG  
YPDVLAQISHLIDPNVPVKDGRFAYMTGKNNTDEGLFNVFTGRDDLQRFNRIEKWNGKDE  
LPWWESGTPCAKLLGTNGELVHPISSTDEHIFNPVFCKSWRLTRGPDVDSLGITLTRF  
IAGPEILYNSSKAPSHRCFEKPGISLPSGGMYLSRCQFGLPLVLSYPHFYAADPVYLEHI  
EGLSPDES RHQFYTDVEPRLGITLGLSARAQINVKLERVDFLKYFRHVPELVLPVFWQEI  
KIEQTPAFAEHINELLERPLFYARLSYGFMIACGVMTILGTLTYVLVLYGRQHK

>TrpX7A6

LRVDIFQNLVIDPSNEVYQSWQKNPVIHVKMYLFNYTNPKEVIQGAKPCLKQLGPFVYR  
EHREKVNITFNGNGTVSYRQVLSYEYLQEYSVGSDDKIYTLNVPMIGAAYKNRKSPPGE  
EEMANAMEDIFKGMNQSLLVHRAVRELLFEGYEDQMLLLAKQFSWSPTRFGYQFGRNN  
SNDGLYTIFTGADEMANYGTVEHWEGRERVKGFRKSCSFVNGTTGEMWPPYTVTAEQPLV  
FFVSALCRSLRLDFLRNETVKRIQVLRFHLSERLFDYTIENQCYCSKKGKDLCEFPNG  
VLDINKCQPEAPLVVSLPHLLYTPAISEAVEGLSPNADLHEFFMDVEPTMGIPLRVSAR  
LQMNVIIDSFKYFKQFEVFKKRAFLPTFWLETTATINDDLAFKIRLVTQDLEGYVICASF  
FWVVLGLIVIIIVTLGYVIAHTRKSRLEQPSLRSYTNVMTMPANR

>TrpXVL0

MKLTGGKRRPTALLEYVGMGFTAGRTAGIICVMLGACLVVLGAAVLVNFTATFRFILGKK  
VVLAPTSQGFPIWRDVSQHLDRVAWYFFNLTNGKEFLDGKKPVLKEVGPWFWRFTTISKK  
NIHFSNKTVTFEHRSFQFDLINSVLPYDTRITMINVPVMTALQKLMGLSRVTRLLADS  
AILSLIGDQNLNTNYTVAELTYEGQYNKLVAISKIKEGVMEAISALSSEDDKKGKGFVAV  
DKNETHPAIFNMYTGASGVMDLNRIHSVNNQHVLSIWPTQDMHENNACNIVDGTFGYLRP  
PMNESNEQKVYIPDMCRAVTLHYEKDVSFHGIRLRRFTLGKENFYNRKQEPKNACYDEQF  
REPSGVSEVGPCQKQAPVLMSPHFMYPANPKFSKMVEGMNPNVEQHSFIMDHEPTTGMTV  
SVRGRLQANFRVIPLDMMEGGNIPNALMPLFWQEMYVEAGPLVAFHLKVTGYPSLAKIA  
LIIVLLIGFIVSIIGAGFLIK

>TrpXA72

MKSRGITTIGICALFALVAFLSVTAFIKVPALLEQFVLSRSGISRDSLAEYLFVIPFDI  
RQNVYMLNITNPDEFFKGAKPHFQQLGPYVFRVNLRNMTWSDGDLTYRENKRFWYDAA  
LSNGHLNDSINTVDPVYTAQEVDELPLIVQKFVRPLLESRKVLFKHTVRELLYDGYTD

PLAELAHLIKPDLPPVNGKIGYLRSMNDDDDGDMTVFGGTNPSTRDKRNLVIEWWRHKKTI  
PYYSSGGCNRIWGANAELYPSFNLSSPPEKIGLFLPLFCRPWSLHYNGTRWENGLKLARFG  
TGLDIFSSSNSTGIKECAQPGSWPQGLFDVRACQHDFPALLSLPHFLHADDKILQDVDGL  
RPDVTKHDLHLDVFPLLGIPVRPAVRVQLNVRIWRHLDLRSRGNPSIVYPVLWQEIVLSE  
QSVSYIASMIWYVIQLPQILLQVIAFILFFVSVCFIIHCYAASQKASGDDTVSIMRSTD  
DMAAIG

>TrpWZC0

MNGEKPAVREIGPYVYLQKRRKFITHIDKNVVITYKAYKSYHFVPEYSNGIPDDKLYALNV  
PMVAMDKLVGAKLPGDLAKSLLQPILEGLIDKHQEKLVVERKVSEMLFDGYPIPMLTEVS  
KLAAAFMPDAKLPAADRFGLFYNTNDTADQLFTVGTGAGDYPFATILKWNNTLSLNFWS  
EYCNKINGTDGAQFSPFIETNQKLFVFATDLCRSIYFEFEKPTQVKGVDTKRFTVPAVDF  
ASATQRAENRCFCEGSGRCHEGGVIPLSSCRRGAPIMLSAPHFYQGDAKLVQDVEGLRPE  
KKNHETFLDVQTMGTGLVLRRAAKRLQINIDLKQSDLLYPLANLTSRVMPIAWVEERMEATR  
SMTEALTQRLIQPKMGVMMASSA AVLGGGAIGAIALLVIVVRQANTSRS AKLQPSK

>TrpXN95

MVSYEHLPHLSVGLDDK VYTLNVP MIGSAYKNRKN SPEEELLMANAMEEIFEKYNQ TIL  
VHRKVRELLFEGYEDQLLVIAKGMGWSPVQRFGYQIGRNNSDDGVYTIYTGAE GMDKYGI  
IESWEGKKRVPGFRKSCGFVNGTTGEMWPPYTLTNQTRLIFFVAPICRSLQLDFLRNETV  
KEIRVLRVYHLNQRLFNYSFEENQCFCTKKKGKDL ECVPNGMLDLNRCQPDAPLTASLPHQ  
LYSTPTVSKAVDGLAPDELHDFMDVEPTMGIPLRVSARLQMN VVDSFRYFEQFAVFK  
EKLFLPTFWIETTATVND ELAFKIRLVTEDLANYVT LASFAWVLMGLIIIICTLGYIISH  
TRRSRRPRPSSEYRAVKIIATTR

>TrpXQP1

MVSIKLVKVALQVLAVVLSVFSGLIVLSSSASSLVSRIAKGQANLESEDVLENFISPPVP  
VYQRIYMFNLNSKEVRKGAKPSVDEIGPYVFRV DMLKKNVTLRDGILSFKQYKAYHFVP  
ELSGGLSLQDQIITVNPILHFFFLTVD SFDNNTHLRRLPFFKKT VDELLYNGFEDDILDN  
LEDTDIPTYEGRVGYLVGTNNTIEGAYEVFSGSDEDRGKLNNIISFFGRRHFTY YEEPCN  
EVEGNGELYPPFSAAPESIALFNPQLCRPWALHFNGSVSKNGLQLARFVAKDDFLSATG  
NATVDECLDLHDGADWKALFNAAPCHNSIPVWLSLPHFLKADATLLSDV VGLSPDPKKEH  
VYLDVYPKVGFTVDMRIRVQVNLKLRGPKDGQTPEVIYPILWQEIMVY PEGSAKIARIL  
YEKVELPRALLTRISVVLAVLCFIAALVCV GIRLRLSDTSVSLDAVTGPYPPNWKLLGME  
FSSREPSNAETGRELVIKTFRTEKLCH

>TrpXHA3

MYALRRAAKDAIIPDSQAAGDFTAERVFELRCYLFNLTNEGSIGSVETPPELVQRGPYV  
FRVVRKRLAVFEDSGLMRYSDTETFYFDPSKSKGTLRDEILTPDPLVALLTYEKATSNSV  
KLSGLKRLRKRKTFTVRTVGQLLFDGYND DFLTKRDSSTSALKLPEKLG YFYGRNGSTSK  
WFTIETGANDSSEVGTIRLINGKKQLPFYRAPCNVIEGTNGMHGPPFSPWDP PPFYFKIFI  
QTLCRPWRLQLAHKRLNFYGLTVAQFHADREIFGWTGNQKYDSCLQPNPTGFWGTFDATP  
CSHNLPIVLSLPHFLHGTEMLGKLIRGLSPDDNLHRLYLN IYPILLGGFLQATGVTVDAA  
IRVQLNLPLNLIKYEKSHVIYPVLWHETLIPETTKEQIVALLSFEVQPFLDVYPLAALIV  
GLCYFMVGGVLVWYIWKRVQQT NATSIDKTVMGLDGETLDS PNAGREKYFVQCKTVAQPGK  
GLEESQTRDLTDSIATTTTRTFVKS GSKRPGPVTHKGAIARVTPVAKKPVPTPEKRTNIPM  
PSPQQRSQKLS PQKLS  
SSSQSSRQQSSPQQHRSQ LARLLQLLQQSKP WISRGNTRSEDRTTHDEHFEEGWGSYDD



|                                                                                                                                                                                                                                                                                                                                                                                                                                                                                                                                                                 |
|-----------------------------------------------------------------------------------------------------------------------------------------------------------------------------------------------------------------------------------------------------------------------------------------------------------------------------------------------------------------------------------------------------------------------------------------------------------------------------------------------------------------------------------------------------------------|
| YTPPIDQRNRSRRVEDESLIDHDSILTPSDIEDSFERPKSH                                                                                                                                                                                                                                                                                                                                                                                                                                                                                                                       |
| <p>&gt;TrpXPJ7</p> <p>YPSDLAEIAHLIEPKLPIIDGKVGFLGKNATNDGLYSVFSGANNHLDLLNVITEFQNST<br/> TIPYYDEPCNEIRGTNGELYPPFFDAPPESIEIFSPVMCRPWPLHRNGSTTVRGINSVVF<br/> SSGEDLFTKTNNETMDRCFEKMPYMNMGVKGTFDASACQFGQPIVITLPHFFKADPELHKL<br/> VTGLEPDARKHDFSLSVFEFGIVTDLQVRLQVNIPVVRVRPGANTGPLILYPIWWQELIFL<br/> EQDRNKLSDIWDQAVRPKVLIQSFLIGLGLLLIATFIIVAITFYIIDRKGKTPDDDELL<br/> RDEERVERRFEVSDRLSR</p>                                                                                                                                                                          |
| <p>&gt;TrpXQK1</p> <p>MELTPVRIAVFFSIALFVAICFGAYPLVPDVIRAIARTRLALVPGSATADQSKALPVNIT<br/> QRVYMFNITNYSAFMDKGAVPNVRQLGPYTFASEWVKNLSWNGDQLLFRENRTFYFLPDL<br/> SNGTLDDEIVTVDLVVVGAIQMVDKLPRIQKFIRPLDLRPILCKHKVREFLYEG</p>                                                                                                                                                                                                                                                                                                                                            |
| <p>&gt;TrpXQS8</p> <p>LQNLVIDPSNEVYESWQEPPIDIYVKLYLFNYTNPEKMQAGLKPKVEELGPFVYRWLPC</p>                                                                                                                                                                                                                                                                                                                                                                                                                                                                           |
| <p>&gt;IscPC41</p> <p>MWPSVQKLPLVNGSEAFELWRDIPLPAFQRVYFFNLTPNYEFLQEGKKPKLQEVGPYTFG<br/> VSMVKTNIVWNPNTVSYREVTFHFDRKSVGGQDDVIVSINAPLVGAGALLKRANPAL<br/> RLVMAVVINKLNEQLIVNHTVGELLYDGYPDFLAAASHMLDPTIPTSDGKFGYMHGRNAT<br/> DDGLYTVYTGEDQMDLYNIITRWNGKENLTAWKGTCTNMINGTSSFPQGSFKLVREGTDSL<br/> YGISAVRFRVDNRTFDNGTTYPPNACFDTKRTMASGAVDIGPCQHNLPAALSFPHFYLAD<br/> PSYSDKVEGMKPDPRHSFTLDMEPDDDSSLLINDDKVDEPSDKENGIHG</p>                                                                                                                                             |
| <p>&gt;IscQ461</p> <p>MNCIKERISLCVISLSSVVLGMLTLLGFDNIFRLILNKVIRRISLCVISLSSVVLGMLTL<br/> LGFDNIFRLILNKEVSLAEHSRAFPMWRDVGHDTLVRFYFFNTTAQLLKEQNFIIRGIAS<br/> LTLSGLGQRIFISRTVGQLTFGGYPDILILLGSVVDSEGRPRPGQPGFNIQDVFRNGYRAV<br/> TKVLGSLVDPNQGTNGKFGYMINKNDTVDGEYTIFTGENDISQVNKVYEFNKQRSIPTE<br/> NMGYEDFMGLKVKRFVAGPLAFDSGQKFRENSCFAAGKELPEGGTDLGPCKQGAPLVLSF<br/> PHFLYADPAYLADVDGLHPDVTKHQFFNSEPTLGVTVNVRGRIQYVEARGDTLKMRLTI<br/> VNLPEYVQWFSVGHVSSIALASTAFALFRPRTRRGDITKVRPINGASKAKYADTHCAD<br/> ILPNKVERIIQNGLERLPNTFGITAARNNFINEKSGNNTNPRRPSEPSAPPEVNIYKS</p> |
| <p>&gt;IscQI62</p> <p>SAAHTVRFDTTEFEFFKEAVSEIFVAKNSTFFVRRMTRELLFDGYDEPILTAAKSLGIEV<br/> PSTKFGWLLGKNGTDDGEYTIFTGSKGMHNYGEMDKYNGLSIRLSYLGDVETRGVKLRR<br/> YWGEGRFLDYAEKDNRCFCTGACFPGSVLNISACQQGAPVAVSFPFLYGDPSYQQAVEG<br/> IAPDKRHQMYLDIEPLASADKGLLSKVRLVTEEIPQYVTVASFGAVIIGGIVLLATLVY<br/> AIRYTRRPKPVPRPTYIPVTVLK</p>                                                                                                                                                                                                                                          |
| <p>&gt;IscPD82</p> <p>MINGTDGGQFAPFVSKDSELYVFATDLCRSMRFNYERDTEVHGLKTMRFTPPATLFAASAD<br/> EDENNRCFCTTSTCPKSGVVYVSTCQKGAPIVLSPPHYLGDNEYVNGVAGLSPVKEQHE<br/> TFLDIHPLTGLVLRASKRLQINIDLKNYDKLHKVTVIPDHSVDVSNHLSDGVSVE</p>                                                                                                                                                                                                                                                                                                                                           |
| <p>&gt;IscQ458</p> <p>MWGGDECNLIRGTFGNVRPPMATTDEQRVFIPDIKRSVLLRYVHDSKVGSVHTRRFAVTP<br/> EVFASGKTRPENACYNKRTLDPGAADMGPVAKGAPVAVSLPHFLYGNQSEFGVEGLTPDE</p>                                                                                                                                                                                                                                                                                                                                                                                                        |

DKHLLYVDSEPKKS

>IscP9A7

MAPVCLLQNLILEPGNEVYAHWQEVPIPIYIKYFFNVTNPNEVLEQTEKPRLEELGLRE

**Table S8.** Protein sequences of GPCR used to construct phylogenetic tree.

|                                                                                                                                                                                                                                                                                                                                                                                                                                                                                                                                                                                                                                                                                                                                                                                                                                                                                                                                                                                                                                                     |                               |
|-----------------------------------------------------------------------------------------------------------------------------------------------------------------------------------------------------------------------------------------------------------------------------------------------------------------------------------------------------------------------------------------------------------------------------------------------------------------------------------------------------------------------------------------------------------------------------------------------------------------------------------------------------------------------------------------------------------------------------------------------------------------------------------------------------------------------------------------------------------------------------------------------------------------------------------------------------------------------------------------------------------------------------------------------------|-------------------------------|
| >DgalGPCR1                                                                                                                                                                                                                                                                                                                                                                                                                                                                                                                                                                                                                                                                                                                                                                                                                                                                                                                                                                                                                                          | <i>D. gallinae</i> -Rhodopsin |
| MCRLSCTYINLFICASNFIVVALTMERFYAVAVPMKARTRGFSGRPNWSIGVCFFLAIVLYLPSV<br>YNYRLMAIEHSIDESTTLPSFRCYVCQWSRFQEQDGRVYVCIREIFSRVIPVFIVVILNVGMVIS<br>LKHHQKSRAKLSECRASQAIASPDAAADSDERLKRLLIVVMILFVVCNAPT VFRFLMRSSGIN<br>ELLPEIFVFCANLLALFNACNFYVYCF CSTAVRTRVWELLFKVVPGYTTTSTEKKHTLT                                                                                                                                                                                                                                                                                                                                                                                                                                                                                                                                                                                                                                                                                                                                                                          |                               |
| >G. occidentalis                                                                                                                                                                                                                                                                                                                                                                                                                                                                                                                                                                                                                                                                                                                                                                                                                                                                                                                                                                                                                                    | Rhodopsin                     |
| MNADNISAFFDDWASNFTDNTQSENVTVVPTVIRGSKQIADGICSHFFMGPRSRNVSPAIDWVR<br>SIEFHILLPTIAVLGFVGNAINLIVLRSFTGRTFFYFLWLAVSDLGTMIFDSLFSLSFSIAPTNSLMA<br>FLQCHMVPAGAGISLTCSNFIVVLTVDVFRVAVCYPIETRAKENNSRPRKLVLLCFVSALVVFPG<br>NTYRRRVEAVVFDLGERSTMTTLCYVCQRRRFSNNTLITFYRILLAVFSKIIPVMIVATVNISIVV<br>GLTRHQSERANLHLGPLRQETAEDRLKLLITITTFVICLVPIAFRQLYRQEPNTLGFVFKA<br>LSLVMIHNTACNFYVYCFYSEAIRNQLRKISGHLLNTAKKNLRTTTILSSTSPSTPSSPGTPTD<br>AISFISFDPSVDSKL                                                                                                                                                                                                                                                                                                                                                                                                                                                                                                                                                                                                         |                               |
| >I. scapularis                                                                                                                                                                                                                                                                                                                                                                                                                                                                                                                                                                                                                                                                                                                                                                                                                                                                                                                                                                                                                                      | secretin                      |
| MAPTSRHKTCGNADPPRYRTAYACEGSQLHIACDDGHLVQLIRANYGRFSISICNEHGTLDWS<br>VDCMSHRFRDLPGKTPGGDLVPLPGTVHAAAPPAVVQADNARTPPPPSPEHVL DIGFPFRTT<br>TTEETTEAPSTEAATQEVSTSLDLLTDFCQPVTVREISWNWTRAGEVA VYPCPGGARGDARW<br>QCGVNPVKWLSERPDLSGCNSFWVGDLEERRIHDGVSVVNLASELAQKTRVKVLYGGDLLHT<br>TSIVQQLLSKMEDKLDQALDSYQRQVVEELMNYVDFSSNLEEHRSSWGDLPPEQRA<br>AASSLLEGLERNAMLLVKSHSANMYSRLQSNIMVA VRVLGLQSVTDLSFPDPKMVRGTPW<br>ADLGDSIYLPYKTLLESARNGVVKVAFFSYRQMEAILSAPSPGGDGVGGNMTRLVNSRVMA<br>AALGRRRVLGLSQPVLVTLRHNKEENVSDPECFWDFSKRDWSEKGCWVESSNQTHHTCAC<br>NHLTNFAVLM DVRAVQLSYSNEVALQVITYIGCFISIICMALTITTFHFRSLES DRTVIHKNLCT<br>CLLVAEIVFVAGITQTSQRVVCVVAGLLHYFFLAAFLWMFVEGFQLYVMLIEVDFSEKSRLG<br>WYYVLA YGAPAVVVTVAACVDPTSYGTERYCWL RADNYFILSFVGPVVA ILLANLVFLSIAIY<br>MMCRHASLASSVKNKEQSKMANLRIWIRSATVLVFLGLTWAFGLLYLNAESVVMAYLFTFL<br>NSLQGLFIFVFHCLRNDKVRKEYRQLVRQCPWAPPCVRREDKCPAERPSYAH SNGTAHSAPS<br>GAALSVRTSCTSTFAHPAPADHIYETIDQEDAFPLSATVGGGCARFVPIDPGECHIRSRSDASHQ<br>SNSSLGCDRRPLIRQRIGGSALS DAGERPVDPALVMAVFDGDRVKCTLQGTAPGRLGGKALVT<br>KHPCQPSAHLSTDC |                               |
| >S. scabiei                                                                                                                                                                                                                                                                                                                                                                                                                                                                                                                                                                                                                                                                                                                                                                                                                                                                                                                                                                                                                                         | secretin                      |
| MRLPIVLSQYD TTLPTMSDPTNNDVSVHIPYKVL AQNANDQGQVKVIFLMYRRLSNLLRVRN<br>PIYDFPIHLQYAYKHSTNERSNDFEYPIYQYQRQHQFHHPNPLFRSIPQPPINTIINSDIVGLIL<br>PSDLQHSSYDRLPLPLNGMIELTFRHLRTENVTNGRCAYWDMKRIDEDTFGDWSTAGCETVS<br>TNQHTHTICRCNHLTNFAVLM DINNISFESNDELVLRLITRIGCSISIALAL TLLTSLVYRSLNSIR<br>NSIHKHLCGCLLVAEVIFLLGIDETRMKLVCGLIAIALHYFFLASFLWMFFEGLQLYTMLVQVF                                                                                                                                                                                                                                                                                                                                                                                                                                                                                                                                                                                                                                                                                                |                               |

EHRHNRLTIYSLVAYGAPALLVIVAALVDPLSYGTSQHCWLRTDNHFIWSFLGPALAILLANIL  
FLSLALSIMCRHTPSSIISTTTFAVHQKQQQQHLKVYPSTLTPSPSYSITEHSRMHSIRFVNSKFI  
T

>V. jacobsoni-metabotropic

MLFAIDRINEDETLPGVRLGATILDTCSSDSYALNQSLEFIRASINTADPHNYCHGGGNLTLK  
PEASAAISGVIGGSYSEVSLQVANLLRFRIPQISPASTGTALSDKTRYDFFARTVPPDTFQALA  
MVAVVETFNWSYVSLVYSEGQYGESGQEQFTKEARHHNICIAISEKIPHSATEQQYLSALERL  
QQKPNKVVVLFVRADHAEGVLRAAKELKRKYRDLQSFDFYWIASDGWGARALSEDMQE  
AAEGAITIELESRRIEAFDRYMLDLTVENNERNPWFRDYWEALFECKIRNTSSEKEKLPQGIGS  
SNSSLPSCSENLNISSTKDGYKQENKVQFVVDVYAMAHIDSVREKVCGAHGVCPRLKEVD  
GGLIYQALLNVSFVDLVNSTVRFDEKGAQAPYIINYRRNYSSGELQYIQVGKWLGVVEEGLE  
LMAGDITFGRRETHDRVIPVSVCSAECGIGEVKKVQAGDHCCWICTRCEPHEFVVNESTCADC  
GPSRWPHPHKRSCFDLPVQHMQWNNLFSAPVIAVALLGIVLTCGTIAVFRNNETPIVKASGR  
ELSYMLLSGILICYLMTFVLLKPTPVSCTAQRFGVGLGFSIIYGSLTKTNRISRIFDSARRSAR  
RPSFISPKSQMVITCMLISVQVMATLVWFVLEPPATRTEYPEGRRNQVILKCKIRDSSFLVSLVY  
NMFLITCTVYAIKTRKIPENFNESKFIGFTMYTTCIIWLAFVPIYFGTGNNFQVQITTLCVSISLS  
AYVALFCLFSPKVYIILFHPDKNVRKLTMNSATYKKAPTSSTGGGGGAGGGPPGHNLSGSHG  
TAVNNQPPTTCTTGTADSCVETVKLVPVATISQHTLQQTSPEMTVAQALRGAPPCSQPTQIEG  
GRCFQGANTGECVTSQPRLPGQYSSASRATPSSSPPATGNKSPCDQGSTMMAKAVDDRGGGD  
CDSMQL

>G. occidentalis-metabotropic

MARCPYLNSVPAALLPGLLLVVVLVTEADTSHHHHRHLGFDEASLYGFDDFPESRFHKTNN  
NYHQAPNHVNGVHDTYSTHNTGLNFSWPVKRAHKKGEVMLGALMMVHERHANWTCGPI  
MPQGGIQALECMFTIDYVNRQEWMPNSVSGFYILDDCSDTYGLEQAVDFIKGSIGRLHDN  
DDRITCSQKSSARGSSNSRPSSPATVDVISGVLGAASSVTSIQVANLLRFRIPQISFFSTPELSN  
KQRFYFLRTVPSDRDQAAAMVELVKLLRWYISIVYEESSNYGIQAFSVLESLLGQQGICIAAK  
EKLTKDSGQANDKAYDYIVDKLKAISRARGVIVFGSDQEV AHLMSAVARGNATGMFSWIGS  
DGWSARSLVSDGHEAQVEGTISVQPMAPHIPEFESYFRNLTAQGNKRNPWFIEYWEYTFKCR  
WNETITPYNQAYNRTC SGHEKLS DNTQTGGFELERQLQFVSDAVLAFAYAVRDMHQQLCPG  
FSGLCRMKPIEGSLLSYLKRVTDFDGLTSDFRFAENTLDGPSRYNHLFKQTKPGTYDWVKI  
GEYRDGQLTLNQTELQFRLEERNTSAEDGSILGTTPSPPIVCSLPCERGS AKKFLEGEKCCW  
QCMPCQKYEVLRTEECV ECARGTL PDEDHQVCLEIPAQHVNPHSSWATGAMAFASAGSILT  
LCVIYVFKYRDTPVVRASGRELSAVLLLGILFCYCVTFVLVQKPTDLFCGLQRTGVGLSFTIV  
YAAILTKSNRIARIFRAGKRTSRPSPFISPKS QLII CGILVCIQVLVAVWLLFSPPKAVKHYP TRE  
QSLLCQASLGSSYVVSFAYPVMLVCVCTAYAVITRKIPEAFNESKYIGFTMYTTCIIWLSFIPL  
YLTTSSQLAIGVTVMCVSISLSATVTLVCMFAPKLCIILLHPEKNVRQPVGMIQNNRYGALRSM  
QRRHVECATQSDDLELGVTVMAKSAVSLASSCAATQTEEEGEEAEETDRLWRQNGIGGDVQL

**Table S9.** Primer sequences for quantitative RT-PCR.

| Genes               | Forward primer (5'-3')        | Reverse primer (5'-3')     | length |
|---------------------|-------------------------------|----------------------------|--------|
| DgalOBP1            | TGCGTTCTTGAGAGCTA<br>TGG      | TTCATCCTTCGGACACTCTG       | 126 bp |
| DgalOBP2            | GGCTTTGGCTGCTGTAA<br>TCTA     | GCAACTTCTCCGCGATACAA       | 110 bp |
| DgalGPCR1           | TCTGCGCGAGCAACTTT<br>A        | AGACTCCGATGCTCCAATTC       | 120 bp |
| DgalNPC2-5          | TATCGTCGTGCTACCTC<br>TGAT     | TCGTCAGAACAGCCTTCAATC      | 126 bp |
| Fun14-like<br>(HKG) | TAA CTG GCT CAC CCG<br>AAC TC | CTT TCT CCA CAG CCT TCC AG | 208 bp |
