# Supplementary material for: Comparative morphological and transcriptomic analyses reveal chemosensory genes in the poultry red mite, Dermanyssus gallinae
Source: PubMed Central journal article supplement (PMC7578799; doi:10.1038/s41598-020-74998-7), 2020-10-21
Supplement: 41598_2020_74998_MOESM3_ESM.pdf [file 41598_2020_74998_MOESM3_ESM.pdf]

| Gene ID        | F1 FPKM | F2 FPKM | F3 FPKM | H1 FPKM | H2 FPKM | H3 FPKM |
|----------------|---------|---------|---------|---------|---------|---------|
| GAIF01000002.1 | 29.25   | 30.59   | 28.02   | 92.43   | 69.33   | 6.35    |
| GAIF01000003.1 | 0       | 0       | 0       | 0       | 0       | 0.15    |
| GAIF01000004.1 | 0.07    | 0       | 0       | 12.17   | 0       | 0.15    |
| GAIF01000005.1 | 0.39    | 0.08    | 0       | 0.27    | 0.93    | 0.17    |
| GAIF01000006.1 | 12.77   | 12.29   | 26.87   | 25.94   | 15.2    | 28      |
| GAIF01000008.1 | 0       | 0       | 0.14    | 0       | 0       | 0       |
| GAIF01000010.1 | 0       | 0       | 0       | 0       | 0.33    | 0       |
| GAIF01000012.1 | 77.04   | 84.34   | 61.39   | 74.27   | 13.38   | 0       |
| GAIF01000013.1 | 0.46    | 1       | 0.89    | 2.41    | 7.63    | 0.25    |
| GAIF01000015.1 | 2.08    | 1.23    | 0.17    | 0.75    | 0.64    | 0       |
| GAIF01000017.1 | 0.06    | 0       | 0       | 0.07    | 0.61    | 0       |
| GAIF01000018.1 | 1.12    | 1.01    | 0.06    | 1.03    | 0.82    | 0       |
| GAIF01000019.1 | 0.73    | 0.56    | 0.23    | 0.27    | 0.1     | 0       |
| GAIF01000021.1 | 0       | 0       | 0       | 0.87    | 1.21    | 0.28    |
| GAIF01000022.1 | 0.26    | 0.38    | 0.48    | 1.22    | 2.54    | 0.58    |
| GAIF01000024.1 | 0       | 0       | 0.17    | 0       | 0       | 0       |
| GAIF01000025.1 | 4.99    | 0.68    | 0.07    | 8.36    | 15.34   | 1.27    |
| GAIF01000027.1 | 261.19  | 447.09  | 361.6   | 193.57  | 389.79  | 297.1   |
| GAIF01000028.1 | 1.88    | 2.26    | 1.34    | 1.07    | 1.03    | 0       |
| GAIF01000030.1 | 0.28    | 0.76    | 0.19    | 6.59    | 16.44   | 0.07    |
| GAIF01000031.1 | 0       | 0.24    | 0       | 0       | 0       | 0       |
| GAIF01000034.1 | 0.73    | 2.14    | 0.03    | 0.29    | 0.04    | 0.1     |
| GAIF01000036.1 | 52.91   | 63.67   | 109.15  | 16.3    | 21.79   | 130.09  |
| GAIF01000038.1 | 0       | 0.21    | 0       | 0.9     | 0.05    | 0       |
| GAIF01000040.1 | 7.02    | 5.1     | 3.9     | 4.24    | 2.69    | 1.6     |
| GAIF01000042.1 | 0.2     | 0.19    | 0.18    | 0.35    | 0.19    | 0.39    |
| GAIF01000044.1 | 2.41    | 0.1     | 0.1     | 0.31    | 2.04    | 0.1     |
| GAIF01000047.1 | 11.12   | 9.97    | 16.14   | 23.77   | 14.7    | 16.63   |
| GAIF01000048.1 | 243.69  | 309.25  | 960.6   | 0       | 0.04    | 358.97  |
| GAIF01000050.1 | 0.22    | 0.89    | 1.33    | 55.07   | 65.75   | 23.19   |
| GAIF01000051.1 | 1057.25 | 843.44  | 407.93  | 175.08  | 61.51   | 5.25    |
| GAIF01000052.1 | 0       | 0       | 2.67    | 0       | 0.35    | 0       |
| GAIF01000053.1 | 8.82    | 7.01    | 2.77    | 16.22   | 22.21   | 0.94    |
| GAIF01000054.1 | 0.54    | 0       | 0       | 1.63    | 10.5    | 0.12    |
| GAIF01000055.1 | 0       | 0.38    | 0.16    | 0.19    | 0.69    | 0       |
| GAIF01000057.1 | 0.56    | 0.38    | 0.15    | 0.32    | 1.42    | 0.15    |
| GAIF01000058.1 | 0       | 0.03    | 0.01    | 0       | 0       | 0       |
| GAIF01000059.1 | 0.89    | 1.1     | 0.28    | 1.03    | 0       | 0       |
| GAIF01000061.1 | 0       | 0       | 0.55    | 0       | 0       | 0       |
| GAIF01000064.1 | 0       | 0.05    | 0       | 0       | 0       | 0       |
| GAIF01000065.1 | 0.63    | 0       | 0       | 1.11    | 1.12    | 0       |
| GAIF01000066.1 | 1.4     | 0.34    | 0.06    | 3.06    | 16.55   | 1.48    |
| GAIF01000067.1 | 0       | 0       | 0       | 0       | 0.23    | 0       |

|                |        |        |        |        |         |        |
|----------------|--------|--------|--------|--------|---------|--------|
| GAIF01000068.1 | 0      | 0      | 0      | 0.07   | 0       | 0      |
| GAIF01000069.1 | 0      | 0      | 0      | 0      | 0.21    | 0      |
| GAIF01000070.1 | 0      | 6.02   | 5.94   | 0      | 0       | 0.56   |
| GAIF01000071.1 | 0.21   | 0.11   | 0.06   | 1.03   | 3.88    | 0.11   |
| GAIF01000072.1 | 0      | 0      | 0      | 0.13   | 0.1     | 0      |
| GAIF01000075.1 | 9.26   | 0      | 0      | 10.19  | 30.07   | 18.64  |
| GAIF01000076.1 | 0.08   | 0.08   | 0      | 0      | 0       | 0      |
| GAIF01000077.1 | 0.13   | 0.14   | 0      | 0.21   | 1.39    | 0.66   |
| GAIF01000079.1 | 36.29  | 33.36  | 24.76  | 86.06  | 86.9    | 17.36  |
| GAIF01000081.1 | 11.79  | 7.3    | 8.4    | 27.86  | 21.88   | 72.11  |
| GAIF01000082.1 | 0.49   | 0      | 0      | 2.68   | 8.43    | 0.27   |
| GAIF01000083.1 | 0.13   | 0      | 0.27   | 0      | 0       | 0      |
| GAIF01000084.1 | 0.31   | 0      | 0      | 0.87   | 3.85    | 1.1    |
| GAIF01000086.1 | 10.3   | 10.87  | 14.14  | 28.04  | 14.66   | 6.51   |
| GAIF01000087.1 | 1.41   | 4.06   | 2.61   | 0.76   | 1.03    | 0.17   |
| GAIF01000089.1 | 0      | 0      | 0      | 0      | 0.13    | 0      |
| GAIF01000090.1 | 27.23  | 11.55  | 10.02  | 82.04  | 55.33   | 1.19   |
| GAIF01000092.1 | 0.06   | 0      | 0.05   | 0.15   | 2.94    | 0      |
| GAIF01000094.1 | 1.65   | 0.58   | 0.24   | 3.58   | 1.63    | 3.05   |
| GAIF01000095.1 | 9.58   | 14.86  | 7.29   | 20.76  | 13.21   | 2.68   |
| GAIF01000097.1 | 32.68  | 2.79   | 4.56   | 1.45   | 0.25    | 0.31   |
| GAIF01000098.1 | 0.32   | 0.08   | 0.12   | 0.54   | 0.47    | 0.12   |
| GAIF01000100.1 | 0.19   | 0.18   | 0.37   | 2.87   | 4.08    | 16.7   |
| GAIF01000102.1 | 7.41   | 10.64  | 4.71   | 11.17  | 10.48   | 1.22   |
| GAIF01000103.1 | 0.33   | 0      | 0      | 0      | 0       | 0      |
| GAIF01000104.1 | 6.72   | 14.79  | 8.78   | 19.14  | 15.09   | 2.2    |
| GAIF01000105.1 | 0.16   | 0.18   | 0.54   | 0      | 0       | 0      |
| GAIF01000106.1 | 0      | 0      | 4.61   | 0      | 0       | 0      |
| GAIF01000107.1 | 3.26   | 0.72   | 1.17   | 1.39   | 0.72    | 0.37   |
| GAIF01000108.1 | 0      | 0      | 0      | 0      | 0.1     | 0      |
| GAIF01000109.1 | 5.29   | 2.97   | 5.69   | 7.89   | 10.23   | 3.43   |
| GAIF01000110.1 | 17.82  | 10.62  | 21.52  | 37.95  | 30.87   | 124.34 |
| GAIF01000111.1 | 0.13   | 0      | 0      | 0      | 0       | 0      |
| GAIF01000112.1 | 14.32  | 18.78  | 5.14   | 36.01  | 49.78   | 3.32   |
| GAIF01000113.1 | 0.06   | 0.03   | 0      | 0.48   | 2.45    | 0.14   |
| GAIF01000114.1 | 0      | 1.03   | 2.74   | 0.1    | 0       | 0.66   |
| GAIF01000115.1 | 8.34   | 11.83  | 2.41   | 24.66  | 23.38   | 2.82   |
| GAIF01000116.1 | 935.35 | 758.22 | 587.59 | 716.25 | 1011.58 | 676.03 |
| GAIF01000119.1 | 0      | 0      | 0      | 0.14   | 1.2     | 0      |
| GAIF01000120.1 | 0      | 0      | 0      | 0.08   | 0.47    | 0.04   |
| GAIF01000121.1 | 10.62  | 6.76   | 6.39   | 14.83  | 20.44   | 1.4    |
| GAIF01000122.1 | 0      | 0.06   | 0.12   | 0      | 0       | 0.06   |
| GAIF01000123.1 | 0      | 0      | 0.42   | 0      | 0       | 0      |
| GAIF01000127.1 | 0      | 0.17   | 0      | 0.27   | 0.28    | 0      |

|                |        |         |         |         |         |         |
|----------------|--------|---------|---------|---------|---------|---------|
| GAIF01000128.1 | 0      | 0.21    | 0       | 0.56    | 1.15    | 0       |
| GAIF01000129.1 | 30.25  | 33.39   | 20.64   | 46.68   | 42.93   | 12.48   |
| GAIF01000130.1 | 145.25 | 110.92  | 99.79   | 186.97  | 99.53   | 21.78   |
| GAIF01000131.1 | 6.1    | 9.58    | 15.42   | 8.72    | 8.09    | 8       |
| GAIF01000133.1 | 12     | 6.64    | 7.74    | 27.08   | 21.34   | 12.66   |
| GAIF01000134.1 | 0      | 0.28    | 0       | 0       | 0       | 0       |
| GAIF01000135.1 | 15.49  | 12.63   | 10.75   | 49.2    | 26.52   | 3.2     |
| GAIF01000138.1 | 0      | 0       | 0       | 0       | 0.13    | 0       |
| GAIF01000139.1 | 3.39   | 5.88    | 3.46    | 10.24   | 8.72    | 1.06    |
| GAIF01000140.1 | 0.71   | 0.36    | 0       | 6.27    | 14.51   | 0.05    |
| GAIF01000141.1 | 0.7    | 0.91    | 0.77    | 0.49    | 0.17    | 0       |
| GAIF01000142.1 | 1.19   | 1.3     | 1.31    | 0       | 0       | 0       |
| GAIF01000143.1 | 0      | 0       | 0       | 0       | 0.5     | 0.1     |
| GAIF01000144.1 | 0.09   | 0.06    | 0.1     | 0.72    | 2.72    | 0.4     |
| GAIF01000146.1 | 5.16   | 0       | 13.67   | 1.38    | 0       | 12      |
| GAIF01000147.1 | 0      | 0.85    | 0.72    | 2.86    | 0       | 0       |
| GAIF01000148.1 | 0.33   | 0.65    | 0.06    | 1.27    | 6.04    | 0.06    |
| GAIF01000149.1 | 0      | 0       | 0       | 0       | 2.26    | 0       |
| GAIF01000150.1 | 64.68  | 110.05  | 120.58  | 198.37  | 184.16  | 227.93  |
| GAIF01000153.1 | 5.75   | 1.06    | 0.54    | 19.46   | 82.87   | 7.96    |
| GAIF01000154.1 | 0      | 0       | 0       | 0       | 0.09    | 0       |
| GAIF01000155.1 | 5.74   | 5.61    | 2.58    | 12.52   | 12      | 1.64    |
| GAIF01000156.1 | 0.2    | 0.21    | 0.59    | 0.11    | 0       | 0.05    |
| GAIF01000157.1 | 0.08   | 0       | 0.1     | 0.69    | 4.29    | 0.1     |
| GAIF01000158.1 | 3.13   | 0.23    | 5.37    | 2.35    | 0.14    | 1.08    |
| GAIF01000159.1 | 0      | 0.09    | 0       | 0.1     | 0.41    | 0       |
| GAIF01000161.1 | 0.43   | 0.31    | 0.55    | 1.91    | 6.29    | 0.71    |
| GAIF01000164.1 | 0.05   | 0.07    | 0.1     | 0.08    | 0.59    | 0       |
| GAIF01000165.1 | 0      | 0       | 0       | 0.42    | 0.63    | 0.2     |
| GAIF01000166.1 | 0.13   | 0.1     | 0       | 0.15    | 0.81    | 0.14    |
| GAIF01000167.1 | 14.64  | 20.85   | 10.98   | 38.3    | 46.1    | 2.99    |
| GAIF01000168.1 | 0.16   | 0       | 0.09    | 0.55    | 0.09    | 0.69    |
| GAIF01000169.1 | 2.58   | 0       | 0.17    | 7.89    | 18.14   | 3.7     |
| GAIF01000171.1 | 0      | 0.06    | 0       | 0       | 0       | 0       |
| GAIF01000172.1 | 0.4    | 1.39    | 0       | 3.89    | 4.48    | 0.72    |
| GAIF01000173.1 | 0      | 0       | 0       | 0       | 0.33    | 0       |
| GAIF01000174.1 | 201.39 | 257.27  | 422.49  | 197.62  | 152.16  | 541.84  |
| GAIF01000175.1 | 4098.6 | 7174.02 | 3216.73 | 4940.36 | 4759.06 | 1200.15 |
| GAIF01000178.1 | 3.68   | 6       | 0.92    | 3.17    | 6.77    | 0.37    |
| GAIF01000180.1 | 51.22  | 47.36   | 39.35   | 100.98  | 41.74   | 27.24   |
| GAIF01000181.1 | 0      | 0       | 0       | 0       | 0       | 0.03    |
| GAIF01000183.1 | 0      | 0       | 0       | 0       | 0.36    | 0.04    |
| GAIF01000184.1 | 0      | 0       | 0       | 0.09    | 0.38    | 0.26    |
| GAIF01000185.1 | 19.41  | 0.08    | 1.43    | 3.92    | 0       | 0.08    |

|                |        |        |        |        |         |        |
|----------------|--------|--------|--------|--------|---------|--------|
| GAIF01000189.1 | 0      | 0      | 0      | 0.06   | 0.04    | 0      |
| GAIF01000191.1 | 0      | 0      | 0      | 0.24   | 0.73    | 0.45   |
| GAIF01000194.1 | 0      | 0      | 0.28   | 0.17   | 1.08    | 0      |
| GAIF01000195.1 | 0      | 0      | 0      | 0.99   | 1.28    | 0      |
| GAIF01000196.1 | 3.62   | 4.1    | 1.21   | 7.48   | 7.19    | 0.17   |
| GAIF01000198.1 | 11.03  | 12.93  | 2.59   | 31.44  | 49.19   | 1.56   |
| GAIF01000199.1 | 105.55 | 147.86 | 33.7   | 328.38 | 252.92  | 14.54  |
| GAIF01000200.1 | 3.66   | 0.47   | 0.48   | 0      | 0.07    | 0.07   |
| GAIF01000201.1 | 2.42   | 1.63   | 1.01   | 4.82   | 12.49   | 8.78   |
| GAIF01000203.1 | 0      | 0      | 0      | 0.52   | 1.43    | 0      |
| GAIF01000204.1 | 2.2    | 1.15   | 4.02   | 0      | 0       | 1.07   |
| GAIF01000205.1 | 0.28   | 0      | 0      | 1.57   | 3.3     | 0.19   |
| GAIF01000206.1 | 143.59 | 5.18   | 0.32   | 895.89 | 1847.95 | 0.97   |
| GAIF01000207.1 | 0      | 0.11   | 0      | 0      | 0.12    | 0      |
| GAIF01000209.1 | 0      | 0      | 0.04   | 0.13   | 0.9     | 0      |
| GAIF01000210.1 | 0.56   | 0.44   | 0.09   | 0      | 0.1     | 0      |
| GAIF01000211.1 | 0      | 0      | 0      | 0      | 0.46    | 0.03   |
| GAIF01000212.1 | 0      | 0      | 0      | 0      | 0.15    | 0      |
| GAIF01000213.1 | 0      | 0.28   | 0      | 1.19   | 3.85    | 0      |
| GAIF01000214.1 | 54.06  | 1.99   | 184.18 | 7.82   | 0       | 1.13   |
| GAIF01000215.1 | 59.75  | 57.44  | 57.16  | 84.47  | 45.06   | 28.4   |
| GAIF01000217.1 | 22.84  | 32.23  | 42.08  | 52.87  | 32.29   | 16.94  |
| GAIF01000218.1 | 0.07   | 0.23   | 0      | 0.5    | 0.09    | 0.87   |
| GAIF01000219.1 | 0      | 0      | 0      | 0      | 0       | 0.06   |
| GAIF01000220.1 | 12.41  | 9.79   | 11.3   | 15.41  | 11.55   | 14.13  |
| GAIF01000221.1 | 1.67   | 3.24   | 1.54   | 1.33   | 0       | 1.07   |
| GAIF01000222.1 | 0      | 0      | 0      | 0      | 0       | 0.07   |
| GAIF01000223.1 | 0      | 0.12   | 0      | 0      | 0       | 0      |
| GAIF01000224.1 | 368.15 | 50.53  | 183.77 | 233.62 | 120.56  | 838    |
| GAIF01000225.1 | 0      | 0.17   | 0      | 0.18   | 0.19    | 8.99   |
| GAIF01000227.1 | 0.77   | 2.01   | 0.57   | 4.83   | 4.13    | 0      |
| GAIF01000229.1 | 7.87   | 15.33  | 4.39   | 51.91  | 131.16  | 2.28   |
| GAIF01000230.1 | 0.08   | 0.25   | 0.09   | 0.71   | 3.7     | 0      |
| GAIF01000231.1 | 2.4    | 0.36   | 0.37   | 8.73   | 26.11   | 102.83 |
| GAIF01000232.1 | 123.27 | 139.12 | 83.9   | 111.79 | 79.97   | 30.43  |
| GAIF01000233.1 | 0      | 0.07   | 0      | 0      | 0       | 0      |
| GAIF01000234.1 | 3.63   | 8.26   | 5.76   | 8      | 5.59    | 1.78   |
| GAIF01000236.1 | 5.61   | 2.91   | 5.13   | 5.43   | 2.25    | 5.74   |
| GAIF01000237.1 | 0.35   | 0.23   | 0.31   | 0.49   | 0.25    | 0.08   |
| GAIF01000239.1 | 1.36   | 0      | 0      | 4.62   | 15.66   | 0.95   |
| GAIF01000240.1 | 3.88   | 6.18   | 7.61   | 2.73   | 1.33    | 3.36   |
| GAIF01000243.1 | 12.05  | 8.77   | 19.1   | 22.57  | 19.76   | 34.61  |
| GAIF01000246.1 | 162.41 | 105.97 | 67.11  | 155.06 | 115.73  | 59.05  |
| GAIF01000247.1 | 0.82   | 1.42   | 3.22   | 9.94   | 7.18    | 0.48   |

|                |         |         |         |         |         |          |
|----------------|---------|---------|---------|---------|---------|----------|
| GAIF01000248.1 | 56.19   | 78.01   | 41.56   | 32.78   | 53.47   | 24.74    |
| GAIF01000249.1 | 1.31    | 0.61    | 0.36    | 6.72    | 15.86   | 0.56     |
| GAIF01000250.1 | 0       | 0       | 1.91    | 0       | 0.05    | 1.77     |
| GAIF01000251.1 | 34.27   | 0       | 7.63    | 118.67  | 18.87   | 107      |
| GAIF01000253.1 | 0.3     | 0       | 0       | 1.74    | 5.22    | 0.66     |
| GAIF01000256.1 | 0.04    | 0.04    | 0       | 0       | 0       | 0        |
| GAIF01000259.1 | 0.85    | 0.47    | 0       | 3.71    | 3.38    | 1.08     |
| GAIF01000263.1 | 46.9    | 6.08    | 0       | 25.76   | 4.81    | 1.16     |
| GAIF01000264.1 | 1.39    | 3.09    | 3.2     | 1.16    | 1.16    | 0.52     |
| GAIF01000265.1 | 10.6    | 9.22    | 10.57   | 3.02    | 3.36    | 1.06     |
| GAIF01000266.1 | 0.56    | 0       | 0       | 1.63    | 3.73    | 1.21     |
| GAIF01000267.1 | 19.17   | 14.76   | 21.63   | 17.61   | 11.85   | 15.84    |
| GAIF01000268.1 | 80.88   | 22.15   | 6.62    | 112.3   | 86.66   | 3.38     |
| GAIF01000269.1 | 0       | 0       | 0       | 0       | 0.04    | 0        |
| GAIF01000270.1 | 0       | 0.04    | 0.04    | 0       | 0.02    | 0.08     |
| GAIF01000271.1 | 131.44  | 184.1   | 170.52  | 129.23  | 108.16  | 67.87    |
| GAIF01000275.1 | 0.19    | 0.2     | 0.14    | 0.72    | 1.64    | 0.41     |
| GAIF01000276.1 | 7.6     | 2.15    | 2.33    | 6.56    | 0       | 4.64     |
| GAIF01000277.1 | 10.28   | 14.41   | 25.82   | 8.86    | 9.35    | 1.83     |
| GAIF01000278.1 | 0.73    | 0.64    | 0       | 1.02    | 3.69    | 0.16     |
| GAIF01000279.1 | 4840.14 | 4818.91 | 7417.05 | 2974.45 | 2189.64 | 12806.42 |
| GAIF01000280.1 | 72.45   | 48.05   | 79.72   | 195.02  | 68.77   | 109.23   |
| GAIF01000282.1 | 0       | 0       | 0       | 0.13    | 0       | 0        |
| GAIF01000283.1 | 1.32    | 2.78    | 2.06    | 0       | 4.06    | 4.66     |
| GAIF01000284.1 | 0.12    | 0.13    | 0       | 0       | 0       | 0        |
| GAIF01000285.1 | 182.65  | 81.85   | 71      | 92.58   | 229.62  | 216.23   |
| GAIF01000286.1 | 0       | 0       | 0.17    | 0.74    | 2.29    | 1.75     |
| GAIF01000287.1 | 267.63  | 103.85  | 50.85   | 232.11  | 194.3   | 155.49   |
| GAIF01000289.1 | 6.78    | 13.92   | 8.01    | 19.69   | 11.68   | 2.61     |
| GAIF01000291.1 | 16.96   | 8.58    | 6.93    | 16.88   | 17.32   | 6.25     |
| GAIF01000293.1 | 621.86  | 183.83  | 222.71  | 517.78  | 298.07  | 3345.63  |
| GAIF01000294.1 | 1.26    | 2.74    | 1.56    | 0.18    | 0       | 0        |
| GAIF01000296.1 | 0       | 0       | 0       | 0       | 0.27    | 0        |
| GAIF01000297.1 | 0       | 0       | 0       | 1.1     | 7.25    | 0        |
| GAIF01000298.1 | 0       | 0       | 0       | 0.55    | 2.59    | 0        |
| GAIF01000299.1 | 12.14   | 15.94   | 8.88    | 50.11   | 35.83   | 4.02     |
| GAIF01000300.1 | 15.64   | 23.22   | 20.11   | 47.02   | 36.85   | 11.68    |
| GAIF01000301.1 | 0       | 0       | 0       | 0.16    | 0       | 0        |
| GAIF01000302.1 | 0       | 0.18    | 0       | 0       | 0       | 0        |
| GAIF01000305.1 | 3       | 6.35    | 5.23    | 9.61    | 8.91    | 1.77     |
| GAIF01000306.1 | 0.74    | 2.6     | 1.11    | 1.07    | 1       | 0        |
| GAIF01000307.1 | 0       | 0       | 0       | 0.07    | 0       | 0        |
| GAIF01000308.1 | 33.19   | 22.02   | 24.61   | 37.92   | 44.22   | 32.38    |
| GAIF01000309.1 | 0       | 0.09    | 0.35    | 0.66    | 0.52    | 0        |

|                |        |       |        |        |        |        |
|----------------|--------|-------|--------|--------|--------|--------|
| GAIF01000310.1 | 1.31   | 0.44  | 0.47   | 6.24   | 17.52  | 0.75   |
| GAIF01000311.1 | 14.59  | 15.55 | 11.69  | 11.51  | 9.47   | 1.29   |
| GAIF01000313.1 | 1.3    | 6.19  | 7.27   | 24.9   | 18.89  | 1.32   |
| GAIF01000316.1 | 0      | 0     | 0      | 0      | 0.08   | 0      |
| GAIF01000318.1 | 0      | 0.04  | 0      | 0.16   | 0.04   | 0      |
| GAIF01000320.1 | 0      | 0     | 0      | 0.06   | 0      | 0      |
| GAIF01000321.1 | 290.92 | 56.7  | 122.5  | 495.41 | 228.74 | 306.12 |
| GAIF01000322.1 | 0.89   | 0.12  | 0.49   | 1.41   | 6.53   | 0.12   |
| GAIF01000323.1 | 6.47   | 11.51 | 23.47  | 0      | 0      | 0      |
| GAIF01000325.1 | 38.03  | 12.61 | 16.96  | 61.88  | 21.15  | 62.02  |
| GAIF01000326.1 | 0.03   | 0.03  | 0.25   | 0.26   | 0.34   | 0      |
| GAIF01000327.1 | 1.23   | 2.57  | 0.52   | 2.46   | 1.86   | 1.04   |
| GAIF01000328.1 | 0.41   | 1.38  | 0.77   | 3.73   | 6.45   | 1.9    |
| GAIF01000329.1 | 3.01   | 0.34  | 0.34   | 12.16  | 33.94  | 4.92   |
| GAIF01000330.1 | 0.32   | 0.35  | 0      | 0      | 1.44   | 0      |
| GAIF01000333.1 | 6.61   | 11.38 | 4.24   | 26.33  | 13.94  | 0.82   |
| GAIF01000337.1 | 46.94  | 56.99 | 14.71  | 56.52  | 30.11  | 6.13   |
| GAIF01000339.1 | 8.01   | 14.67 | 9.94   | 9.88   | 10.73  | 2.79   |
| GAIF01000340.1 | 28.97  | 23.88 | 21.29  | 61.55  | 37.65  | 25.49  |
| GAIF01000342.1 | 0      | 0     | 0.08   | 0      | 0      | 0      |
| GAIF01000343.1 | 1.14   | 0.84  | 1.28   | 2.29   | 2.41   | 0.86   |
| GAIF01000346.1 | 0.26   | 0.1   | 0      | 1.57   | 5.87   | 0.07   |
| GAIF01000347.1 | 0      | 0     | 0      | 0.14   | 0      | 0      |
| GAIF01000349.1 | 7.24   | 3.67  | 2.57   | 8.08   | 12.94  | 22.19  |
| GAIF01000351.1 | 0.64   | 0.38  | 0.16   | 0.49   | 1.95   | 0.31   |
| GAIF01000352.1 | 0      | 0.08  | 0      | 0      | 0      | 0      |
| GAIF01000353.1 | 1.38   | 0.52  | 0.53   | 3.56   | 3.93   | 1.32   |
| GAIF01000355.1 | 0      | 0     | 0      | 0.2    | 0.19   | 0      |
| GAIF01000356.1 | 0.51   | 0.07  | 0.08   | 0.23   | 0      | 0.32   |
| GAIF01000357.1 | 0      | 0     | 0      | 0      | 0.26   | 0      |
| GAIF01000358.1 | 0.08   | 0.04  | 0.04   | 0.25   | 1.7    | 0.11   |
| GAIF01000359.1 | 0.88   | 0.18  | 0.46   | 2.66   | 0.68   | 0.41   |
| GAIF01000360.1 | 0      | 0     | 0      | 0.09   | 0      | 0      |
| GAIF01000361.1 | 0      | 0.17  | 0      | 0      | 0.1    | 0      |
| GAIF01000362.1 | 0      | 0     | 0      | 0.37   | 0.2    | 0      |
| GAIF01000364.1 | 0.76   | 0     | 0      | 2.09   | 10.46  | 1.04   |
| GAIF01000365.1 | 0      | 0.01  | 0.02   | 0.08   | 0.23   | 0.01   |
| GAIF01000366.1 | 3.35   | 0.46  | 0.08   | 2.44   | 10.52  | 6.04   |
| GAIF01000367.1 | 0.25   | 0.09  | 0      | 0.59   | 3.27   | 0.47   |
| GAIF01000368.1 | 0      | 0.04  | 0.04   | 0.48   | 1.41   | 0.21   |
| GAIF01000369.1 | 6.26   | 1.03  | 0.32   | 8.77   | 39.47  | 32.85  |
| GAIF01000370.1 | 0.13   | 0     | 0      | 0.16   | 0.86   | 0.05   |
| GAIF01000372.1 | 0      | 0     | 0      | 0.29   | 0.41   | 0      |
| GAIF01000374.1 | 0      | 1.45  | 114.77 | 0      | 0      | 0      |

|                |        |         |         |        |         |         |
|----------------|--------|---------|---------|--------|---------|---------|
| GAIF01000375.1 | 0.6    | 0.24    | 0.08    | 4.44   | 20.65   | 1.24    |
| GAIF01000376.1 | 165.62 | 245.62  | 139.04  | 143.88 | 127.35  | 36.49   |
| GAIF01000377.1 | 0.33   | 0.17    | 0.17    | 0.18   | 0.24    | 0.14    |
| GAIF01000378.1 | 0.23   | 0.62    | 0.37    | 0.26   | 0.14    | 0.25    |
| GAIF01000380.1 | 3075.2 | 2986.63 | 3022.67 | 2199.9 | 1743.99 | 1477.17 |
| GAIF01000381.1 | 0      | 0       | 0       | 0      | 0       | 0.17    |
| GAIF01000384.1 | 1.95   | 0       | 0.27    | 1.77   | 0.73    | 1.07    |
| GAIF01000385.1 | 6.92   | 12.97   | 5.45    | 9.2    | 7.54    | 2.45    |
| GAIF01000387.1 | 0.41   | 0.23    | 0.98    | 1.09   | 0.75    | 0       |
| GAIF01000389.1 | 0.36   | 0       | 0.89    | 0      | 0       | 0       |
| GAIF01000390.1 | 6.95   | 14.76   | 16.05   | 22.79  | 25.31   | 22.3    |
| GAIF01000392.1 | 0      | 0.07    | 0.33    | 0      | 0       | 0       |
| GAIF01000393.1 | 0.11   | 0       | 0.75    | 0      | 0       | 0.25    |
| GAIF01000394.1 | 6.37   | 6.65    | 15.08   | 19.14  | 9.68    | 16.73   |
| GAIF01000395.1 | 0      | 0       | 0       | 0      | 0.16    | 0       |
| GAIF01000396.1 | 4.67   | 0.14    | 0.09    | 0.48   | 0.05    | 0.14    |
| GAIF01000397.1 | 0      | 0       | 0       | 0      | 0.45    | 0       |
| GAIF01000398.1 | 0.13   | 0.05    | 0       | 0.37   | 1.46    | 0       |
| GAIF01000399.1 | 0      | 0       | 0       | 0      | 2.04    | 0       |
| GAIF01000400.1 | 0      | 0       | 0       | 0.16   | 0       | 0       |
| GAIF01000401.1 | 49.82  | 37.57   | 48.78   | 121.43 | 106.02  | 66.35   |
| GAIF01000402.1 | 0.06   | 0.03    | 0       | 2.66   | 13.01   | 0.08    |
| GAIF01000403.1 | 1.25   | 1.77    | 1.1     | 4.06   | 7.82    | 0.28    |
| GAIF01000404.1 | 0.77   | 0.84    | 0       | 4.4    | 17.67   | 2.54    |
| GAIF01000405.1 | 1.14   | 4.42    | 0       | 2.66   | 3.57    | 0       |
| GAIF01000406.1 | 10.87  | 6.2     | 4.22    | 17.83  | 13.3    | 14.48   |
| GAIF01000407.1 | 0.7    | 0       | 0       | 0.95   | 7.73    | 0       |
| GAIF01000408.1 | 0      | 0       | 0       | 0.07   | 0       | 0       |
| GAIF01000409.1 | 0      | 0       | 0       | 0.26   | 2.16    | 0       |
| GAIF01000410.1 | 4.02   | 0.86    | 0.46    | 8.4    | 1.21    | 0.23    |
| GAIF01000411.1 | 107.12 | 133.92  | 122.26  | 184.6  | 151.08  | 89.87   |
| GAIF01000413.1 | 0      | 0.05    | 0       | 0      | 0       | 0       |
| GAIF01000415.1 | 0.42   | 0.31    | 0.41    | 0.44   | 0.28    | 0       |
| GAIF01000416.1 | 0      | 0       | 0       | 1.95   | 0       | 0       |
| GAIF01000417.1 | 0      | 0       | 0       | 0      | 0.31    | 0       |
| GAIF01000418.1 | 0.21   | 0       | 1.16    | 1.15   | 0.25    | 0.39    |
| GAIF01000419.1 | 0      | 0       | 0       | 0      | 0.17    | 0       |
| GAIF01000420.1 | 5.64   | 6.57    | 4.72    | 13.56  | 9.37    | 0.15    |
| GAIF01000421.1 | 60.09  | 101.52  | 132.93  | 74.09  | 66.07   | 66.22   |
| GAIF01000422.1 | 0.22   | 0.2     | 0.2     | 0.56   | 0.89    | 0.29    |
| GAIF01000427.1 | 0      | 0       | 0       | 0.18   | 1.91    | 0.23    |
| GAIF01000428.1 | 0      | 2.41    | 1.22    | 0      | 0       | 2.08    |
| GAIF01000429.1 | 0      | 0       | 0       | 0.02   | 0       | 0       |
| GAIF01000430.1 | 1.18   | 0.37    | 0.06    | 3.46   | 14.34   | 0.43    |

|                |         |         |         |         |         |         |
|----------------|---------|---------|---------|---------|---------|---------|
| GAIF01000431.1 | 0       | 0       | 0       | 0.07    | 0.08    | 0       |
| GAIF01000432.1 | 0       | 0.03    | 0       | 0       | 0.03    | 0       |
| GAIF01000433.1 | 0       | 0       | 0.12    | 0       | 0.18    | 0       |
| GAIF01000434.1 | 24.11   | 15.28   | 20.02   | 18.33   | 21.29   | 11.62   |
| GAIF01000435.1 | 1.16    | 0.24    | 0.2     | 0       | 0.97    | 0       |
| GAIF01000436.1 | 7.23    | 9.32    | 6.51    | 14.9    | 8.01    | 2.04    |
| GAIF01000437.1 | 0       | 0       | 0.23    | 0.73    | 5.91    | 0       |
| GAIF01000439.1 | 0       | 0.11    | 0       | 0.11    | 0       | 0       |
| GAIF01000441.1 | 0.57    | 0.1     | 0.52    | 1.98    | 8.66    | 1.25    |
| GAIF01000442.1 | 0.01    | 1.03    | 1.77    | 0.28    | 1.28    | 0.21    |
| GAIF01000443.1 | 1.39    | 0.8     | 0       | 0.38    | 1.08    | 0.18    |
| GAIF01000445.1 | 0       | 0.01    | 0       | 0.11    | 0       | 0       |
| GAIF01000447.1 | 7       | 4.97    | 1       | 35.34   | 21.24   | 1.01    |
| GAIF01000449.1 | 0       | 0.27    | 0       | 0.93    | 3.1     | 0       |
| GAIF01000451.1 | 0.81    | 1.02    | 0.59    | 2.34    | 4.68    | 0.15    |
| GAIF01000452.1 | 0       | 0.03    | 0.06    | 0.03    | 0       | 0       |
| GAIF01000453.1 | 1.31    | 0.1     | 0       | 3.26    | 10.8    | 1.96    |
| GAIF01000456.1 | 0       | 0       | 0       | 0.09    | 0       | 0       |
| GAIF01000457.1 | 36.88   | 87.28   | 20.44   | 57.21   | 80.42   | 22.65   |
| GAIF01000458.1 | 0       | 0       | 0       | 0       | 0.02    | 0       |
| GAIF01000460.1 | 6.02    | 9.81    | 6.31    | 16.67   | 17.1    | 1.51    |
| GAIF01000461.1 | 6.39    | 8.24    | 5.31    | 11.23   | 8.12    | 0.91    |
| GAIF01000463.1 | 26.33   | 27.27   | 44.31   | 33.27   | 26.75   | 25.5    |
| GAIF01000464.1 | 0       | 0       | 0       | 0       | 0.93    | 0.08    |
| GAIF01000465.1 | 1.32    | 1.44    | 0.32    | 4.09    | 17.64   | 0.16    |
| GAIF01000467.1 | 4.54    | 2.62    | 0.61    | 15.55   | 30.05   | 5.06    |
| GAIF01000469.1 | 1.39    | 1.83    | 0.97    | 0.85    | 0       | 0       |
| GAIF01000471.1 | 0       | 0.06    | 0       | 0.13    | 0.39    | 0       |
| GAIF01000472.1 | 2.87    | 3.5     | 2.51    | 3.22    | 2.66    | 1.75    |
| GAIF01000473.1 | 0.04    | 0       | 0.05    | 0.15    | 0.85    | 0.05    |
| GAIF01000475.1 | 0.13    | 0       | 0       | 0       | 0.17    | 0       |
| GAIF01000476.1 | 0.31    | 0       | 0       | 1.02    | 1.8     | 0       |
| GAIF01000477.1 | 0       | 0       | 0       | 0.59    | 2.14    | 0       |
| GAIF01000478.1 | 0.48    | 0.39    | 0.78    | 1.66    | 2.86    | 0.39    |
| GAIF01000479.1 | 2420.58 | 2064.64 | 2755.17 | 2458.34 | 1463.41 | 3849.35 |
| GAIF01000480.1 | 2.42    | 1.25    | 0       | 5.91    | 5.66    | 0.59    |
| GAIF01000481.1 | 1.83    | 0.06    | 0.31    | 0.65    | 2.61    | 1.35    |
| GAIF01000482.1 | 10.85   | 6.76    | 4.67    | 37.74   | 36.85   | 0.41    |
| GAIF01000483.1 | 0       | 0       | 0       | 0       | 0.24    | 0       |
| GAIF01000484.1 | 1.32    | 0.36    | 0.58    | 3.26    | 4       | 1.45    |
| GAIF01000485.1 | 0.44    | 0       | 0       | 0.31    | 0       | 0       |
| GAIF01000486.1 | 0.09    | 0.12    | 0.05    | 0.64    | 2.01    | 0       |
| GAIF01000487.1 | 0       | 0       | 0       | 0.13    | 0       | 0.04    |
| GAIF01000489.1 | 0.48    | 0.1     | 0       | 1.88    | 8.07    | 0.17    |



|                |        |         |        |         |        |         |
|----------------|--------|---------|--------|---------|--------|---------|
| GAIF01000491.1 | 14.28  | 13.02   | 8.18   | 51.25   | 29.86  | 3.32    |
| GAIF01000492.1 | 2.21   | 0.17    | 0.25   | 6.81    | 16.2   | 0.84    |
| GAIF01000493.1 | 4.26   | 5.85    | 3.51   | 16.4    | 12.36  | 1.53    |
| GAIF01000494.1 | 16.4   | 13.69   | 12.49  | 4.45    | 4.48   | 1.32    |
| GAIF01000496.1 | 30.93  | 10.95   | 14.03  | 48.77   | 27.04  | 202     |
| GAIF01000498.1 | 260.63 | 102.8   | 96.45  | 165.59  | 85.74  | 187.33  |
| GAIF01000499.1 | 58.01  | 20.7    | 23.55  | 58.13   | 58.08  | 68.65   |
| GAIF01000500.1 | 0.04   | 0.04    | 0      | 0       | 0.05   | 0       |
| GAIF01000505.1 | 0.04   | 0.18    | 0.09   | 0.24    | 0.1    | 0.09    |
| GAIF01000506.1 | 42.05  | 66.69   | 51     | 40.14   | 38.74  | 8.5     |
| GAIF01000508.1 | 185.09 | 339.11  | 152.76 | 92.52   | 128.42 | 40.01   |
| GAIF01000509.1 | 63.4   | 75.92   | 134.41 | 104.17  | 55.8   | 84.03   |
| GAIF01000510.1 | 0.41   | 0       | 0      | 0.42    | 3.03   | 0.38    |
| GAIF01000511.1 | 19.41  | 1.58    | 0      | 26.77   | 38.5   | 12.84   |
| GAIF01000512.1 | 0.29   | 0       | 0.21   | 1.35    | 3.86   | 0.43    |
| GAIF01000513.1 | 0.03   | 0.63    | 0      | 0.34    | 0.61   | 0.48    |
| GAIF01000514.1 | 0.32   | 0.09    | 0      | 3.91    | 21.72  | 0       |
| GAIF01000517.1 | 0      | 0       | 0      | 0       | 0.14   | 0       |
| GAIF01000519.1 | 4.53   | 0.82    | 0.04   | 1.22    | 0.64   | 0       |
| GAIF01000520.1 | 0      | 0       | 0.47   | 0.2     | 0      | 0.28    |
| GAIF01000521.1 | 2.67   | 4.98    | 2.3    | 12.96   | 14.78  | 1.25    |
| GAIF01000522.1 | 26.04  | 0.45    | 0      | 18.46   | 31.98  | 0       |
| GAIF01000525.1 | 19.44  | 18.27   | 25     | 21.79   | 24.22  | 31.92   |
| GAIF01000526.1 | 0.05   | 0       | 0      | 0.03    | 0      | 0       |
| GAIF01000527.1 | 18.39  | 27.02   | 47.31  | 36.41   | 28.53  | 31.72   |
| GAIF01000528.1 | 5.13   | 4.14    | 3.56   | 11.59   | 19.05  | 12.73   |
| GAIF01000530.1 | 0      | 0       | 0.26   | 0       | 0      | 0       |
| GAIF01000531.1 | 6.67   | 12.43   | 7.11   | 2.18    | 1.18   | 0.06    |
| GAIF01000532.1 | 0      | 0.09    | 0.04   | 0       | 0      | 0.04    |
| GAIF01000533.1 | 0.22   | 0.24    | 0.24   | 0.26    | 0.27   | 0       |
| GAIF01000535.1 | 2.12   | 1.39    | 0      | 0       | 0.52   | 0       |
| GAIF01000538.1 | 0.32   | 0.51    | 0.48   | 0.43    | 0.33   | 0.31    |
| GAIF01000540.1 | 28.65  | 31.87   | 24.3   | 8.85    | 5.07   | 3.34    |
| GAIF01000541.1 | 0.74   | 1.08    | 1.09   | 0.72    | 0.4    | 0.14    |
| GAIF01000542.1 | 0.17   | 0.09    | 0.06   | 0       | 0      | 0       |
| GAIF01000543.1 | 0      | 0       | 0      | 0       | 0      | 1.09    |
| GAIF01000544.1 | 2.7    | 0.43    | 0.26   | 10.77   | 59.76  | 22.03   |
| GAIF01000545.1 | 0      | 0       | 0      | 0       | 0.21   | 0       |
| GAIF01000547.1 | 11.39  | 8.72    | 10.26  | 12.83   | 8.16   | 19.17   |
| GAIF01000550.1 | 0      | 0       | 0      | 0       | 0.15   | 0       |
| GAIF01000551.1 | 2.73   | 0.05    | 0      | 0.49    | 0.06   | 0       |
| GAIF01000553.1 | 0      | 0       | 0      | 0       | 0.17   | 0       |
| GAIF01000554.1 | 0.03   | 0       | 0      | 0       | 0      | 0       |
| GAIF01000555.1 | 2165.9 | 1227.07 | 954.88 | 1459.25 | 1316.5 | 3266.95 |

|                |        |        |       |       |       |       |
|----------------|--------|--------|-------|-------|-------|-------|
| GAIF01000557.1 | 0.02   | 0.01   | 0     | 0.11  | 0.36  | 0.03  |
| GAIF01000558.1 | 0.43   | 0.81   | 0.12  | 2.47  | 7.04  | 0     |
| GAIF01000559.1 | 0      | 0.1    | 0     | 0     | 0     | 0     |
| GAIF01000560.1 | 0      | 0.06   | 0     | 0.37  | 1.61  | 0     |
| GAIF01000561.1 | 0      | 0.17   | 0     | 0.39  | 0.18  | 0.11  |
| GAIF01000562.1 | 0.11   | 0.04   | 0.04  | 0     | 0     | 0     |
| GAIF01000563.1 | 0      | 0      | 0     | 0     | 0.37  | 0     |
| GAIF01000566.1 | 17.68  | 30.68  | 17.36 | 65.86 | 41.58 | 6.07  |
| GAIF01000567.1 | 1.27   | 0.13   | 0.06  | 7.15  | 28.33 | 1.27  |
| GAIF01000571.1 | 6.52   | 6.81   | 1.32  | 12.07 | 30.11 | 4.09  |
| GAIF01000572.1 | 0.76   | 0.06   | 0     | 0.13  | 3.02  | 0     |
| GAIF01000573.1 | 198.23 | 106.83 | 68.14 | 4.18  | 3.94  | 19.09 |
| GAIF01000574.1 | 0      | 0.89   | 0     | 0.18  | 0     | 0.9   |
| GAIF01000575.1 | 0      | 0      | 0     | 0.15  | 0.16  | 0     |
| GAIF01000576.1 | 0.66   | 0.18   | 0     | 0.67  | 3.9   | 1.46  |
| GAIF01000577.1 | 0      | 0      | 0     | 0     | 0.1   | 0     |
| GAIF01000579.1 | 0.08   | 0      | 0     | 0.2   | 1.16  | 0     |
| GAIF01000580.1 | 0.8    | 1.45   | 0.29  | 4.78  | 8.31  | 0.15  |
| GAIF01000581.1 | 7.75   | 10.19  | 0.05  | 0     | 1.32  | 0     |
| GAIF01000583.1 | 2.07   | 0.87   | 1.59  | 2.09  | 3.87  | 8.81  |
| GAIF01000584.1 | 1.05   | 0.31   | 0.53  | 1.75  | 1.76  | 0.08  |
| GAIF01000585.1 | 0      | 0      | 0     | 0     | 0.15  | 0     |
| GAIF01000586.1 | 0.12   | 0      | 0     | 0     | 0.36  | 1.03  |
| GAIF01000587.1 | 0.38   | 0.56   | 0.56  | 1.34  | 7.86  | 0.28  |
| GAIF01000588.1 | 0.03   | 0.07   | 0.04  | 0.08  | 1.74  | 0.15  |
| GAIF01000589.1 | 0      | 0.11   | 0     | 0.67  | 2.96  | 0.16  |
| GAIF01000590.1 | 1.21   | 1.32   | 0.81  | 1.92  | 3.86  | 0.1   |
| GAIF01000592.1 | 3.58   | 0.51   | 0     | 0.84  | 2.06  | 0     |
| GAIF01000595.1 | 1.73   | 0.8    | 0.27  | 8.63  | 22.38 | 0     |
| GAIF01000596.1 | 2.21   | 0.88   | 0.5   | 8.12  | 17.73 | 4.49  |
| GAIF01000598.1 | 12.11  | 9.13   | 12.22 | 19.09 | 11.95 | 20.28 |
| GAIF01000599.1 | 0.34   | 0      | 0     | 0.13  | 0.97  | 0     |
| GAIF01000600.1 | 0      | 0      | 0     | 0.12  | 0.13  | 0     |
| GAIF01000601.1 | 23.66  | 8.87   | 9.72  | 35.68 | 62.64 | 47.05 |
| GAIF01000602.1 | 0      | 0      | 0     | 0     | 0     | 1     |
| GAIF01000603.1 | 18.76  | 37.72  | 23.45 | 53.52 | 49.82 | 5.58  |
| GAIF01000604.1 | 0.36   | 1.09   | 0.19  | 1.42  | 2.04  | 0.28  |
| GAIF01000605.1 | 0      | 0      | 0     | 0     | 0.15  | 0     |
| GAIF01000606.1 | 0      | 0      | 0     | 0     | 0.08  | 0     |
| GAIF01000608.1 | 10.16  | 8.92   | 34    | 6.39  | 2.3   | 16.08 |
| GAIF01000610.1 | 0.16   | 0.17   | 0     | 5.84  | 17.56 | 0     |
| GAIF01000611.1 | 0      | 0      | 0     | 0     | 1.36  | 0     |
| GAIF01000612.1 | 0.17   | 0      | 0     | 0.29  | 1.72  | 0.46  |
| GAIF01000613.1 | 0      | 0.14   | 0.21  | 0.15  | 0     | 0.14  |

|                |        |        |       |        |        |       |
|----------------|--------|--------|-------|--------|--------|-------|
| GAIF01000616.1 | 0.33   | 0.57   | 0     | 1.54   | 6.26   | 1.06  |
| GAIF01000617.1 | 0      | 0.12   | 0.09  | 0      | 0      | 0     |
| GAIF01000618.1 | 0      | 0      | 0.09  | 0      | 0      | 0.28  |
| GAIF01000619.1 | 1.43   | 0.16   | 0     | 2.5    | 8.8    | 0.47  |
| GAIF01000620.1 | 1.73   | 2.2    | 0.51  | 3.55   | 4.17   | 0.19  |
| GAIF01000621.1 | 1.68   | 0.09   | 0.04  | 2.68   | 11.22  | 1.12  |
| GAIF01000622.1 | 0      | 0      | 0     | 1.24   | 6.44   | 2.95  |
| GAIF01000624.1 | 16.44  | 19.53  | 9.63  | 13.65  | 7.74   | 2.19  |
| GAIF01000628.1 | 0.03   | 0.06   | 0     | 0      | 0.03   | 0     |
| GAIF01000629.1 | 0.81   | 0      | 0     | 0.93   | 12.98  | 0     |
| GAIF01000632.1 | 6.43   | 11.17  | 12.93 | 36.43  | 43.59  | 5.71  |
| GAIF01000633.1 | 0.26   | 0.28   | 0     | 1.19   | 4.92   | 0     |
| GAIF01000634.1 | 1.28   | 0.71   | 0.18  | 7.95   | 20.91  | 0.38  |
| GAIF01000636.1 | 0      | 0      | 0     | 0.48   | 2.27   | 0     |
| GAIF01000637.1 | 1.57   | 1.07   | 0.34  | 0.2    | 0.14   | 0.49  |
| GAIF01000638.1 | 0.31   | 0      | 0     | 1.99   | 4.13   | 5.23  |
| GAIF01000640.1 | 5.75   | 0      | 0     | 0      | 0      | 0     |
| GAIF01000641.1 | 0      | 0      | 0     | 0      | 0.1    | 0     |
| GAIF01000642.1 | 3.8    | 3.78   | 1.8   | 28.48  | 42     | 7.24  |
| GAIF01000643.1 | 1.33   | 0      | 0     | 0      | 0      | 0.27  |
| GAIF01000644.1 | 0      | 0      | 0     | 0      | 0.27   | 0.11  |
| GAIF01000645.1 | 0.56   | 0.85   | 0.17  | 1.38   | 3.48   | 0.13  |
| GAIF01000646.1 | 0.35   | 0.71   | 0     | 0.27   | 0.14   | 0     |
| GAIF01000647.1 | 1.26   | 0.51   | 0.39  | 2.08   | 10.11  | 0.57  |
| GAIF01000649.1 | 0      | 0.1    | 0.2   | 0      | 0      | 0     |
| GAIF01000650.1 | 23.21  | 21.5   | 13.05 | 43.1   | 42     | 3.59  |
| GAIF01000651.1 | 93.29  | 77.09  | 36.89 | 71.09  | 51.29  | 7.18  |
| GAIF01000652.1 | 0      | 0      | 0     | 0.3    | 0.94   | 0.14  |
| GAIF01000653.1 | 0.04   | 0.03   | 0     | 0.75   | 2.95   | 0.02  |
| GAIF01000654.1 | 0.14   | 0.16   | 0     | 1.09   | 2.44   | 0     |
| GAIF01000658.1 | 4.57   | 3.69   | 5.07  | 1.76   | 0.34   | 2.36  |
| GAIF01000659.1 | 1.77   | 0.34   | 0     | 9.45   | 22.44  | 0.23  |
| GAIF01000660.1 | 28.86  | 47.94  | 19.7  | 54.17  | 43.1   | 3.6   |
| GAIF01000662.1 | 0.04   | 0.05   | 0     | 0.05   | 0.73   | 0     |
| GAIF01000663.1 | 0.9    | 1.09   | 2.2   | 0.7    | 1.09   | 0.77  |
| GAIF01000664.1 | 0.05   | 0      | 0     | 0      | 0      | 0     |
| GAIF01000665.1 | 0.81   | 0.62   | 1.51  | 3.05   | 5.06   | 0.62  |
| GAIF01000666.1 | 0      | 0.56   | 0.35  | 0      | 0      | 0.15  |
| GAIF01000667.1 | 14.97  | 9.49   | 19.03 | 35.75  | 18.75  | 45.5  |
| GAIF01000668.1 | 0      | 0.51   | 0.34  | 1.36   | 9.94   | 0.69  |
| GAIF01000669.1 | 400.66 | 143.58 | 87.01 | 124.83 | 141.35 | 133.7 |
| GAIF01000671.1 | 0.16   | 0.18   | 0.53  | 0.25   | 0.65   | 0.71  |
| GAIF01000675.1 | 17.1   | 27.55  | 24.98 | 19.03  | 13.4   | 6.4   |
| GAIF01000676.1 | 12.41  | 17.44  | 8.72  | 40.01  | 23.83  | 2.65  |

|                |        |        |         |        |        |        |
|----------------|--------|--------|---------|--------|--------|--------|
| GAIF01000677.1 | 0.11   | 0      | 0       | 0      | 0      | 0      |
| GAIF01000678.1 | 14.31  | 8.61   | 8.8     | 27.1   | 16.98  | 21.26  |
| GAIF01000679.1 | 0.48   | 0.36   | 0.28    | 0      | 1.53   | 0.52   |
| GAIF01000680.1 | 0      | 0.04   | 0       | 0.09   | 0.08   | 0      |
| GAIF01000681.1 | 0.06   | 0      | 0.06    | 0.07   | 1.5    | 0.19   |
| GAIF01000683.1 | 18.78  | 19.8   | 17.97   | 61.65  | 80.35  | 18.81  |
| GAIF01000687.1 | 0      | 0.14   | 0       | 0.45   | 1.1    | 0      |
| GAIF01000688.1 | 57.12  | 60.38  | 54.67   | 326.35 | 206.64 | 82.28  |
| GAIF01000689.1 | 13.87  | 18.45  | 7.34    | 35.59  | 67.13  | 2.09   |
| GAIF01000690.1 | 0.5    | 0.54   | 0.09    | 4.08   | 18.27  | 0.12   |
| GAIF01000691.1 | 4.02   | 2.06   | 0.08    | 8.89   | 13.13  | 9.78   |
| GAIF01000692.1 | 0      | 0      | 0       | 0.12   | 1.45   | 0      |
| GAIF01000693.1 | 0      | 0      | 0       | 0.05   | 0      | 0      |
| GAIF01000694.1 | 0      | 0.13   | 0       | 0.14   | 0.15   | 0      |
| GAIF01000695.1 | 0      | 0      | 0       | 0.03   | 0.2    | 0      |
| GAIF01000696.1 | 0      | 0      | 0       | 0      | 0.87   | 0      |
| GAIF01000698.1 | 0.78   | 0.21   | 0       | 2.73   | 0.76   | 0.48   |
| GAIF01000699.1 | 31.06  | 35.05  | 32.49   | 2.85   | 4.22   | 3.36   |
| GAIF01000701.1 | 0      | 0.03   | 0       | 0.15   | 0      | 0      |
| GAIF01000705.1 | 0.18   | 0      | 0       | 0      | 0      | 0      |
| GAIF01000706.1 | 38.15  | 37.11  | 44.01   | 44.22  | 33.41  | 27.3   |
| GAIF01000707.1 | 0.01   | 0      | 0       | 0.06   | 0      | 0      |
| GAIF01000708.1 | 4.9    | 5.61   | 1.48    | 0      | 0      | 0      |
| GAIF01000709.1 | 0      | 0      | 0.06    | 0      | 0      | 0      |
| GAIF01000710.1 | 0.61   | 0.93   | 0.16    | 3.43   | 3.25   | 0.47   |
| GAIF01000711.1 | 0.27   | 0.39   | 0.05    | 1.06   | 4.41   | 0      |
| GAIF01000713.1 | 555.36 | 651.57 | 1105.74 | 228.15 | 157.85 | 264.19 |
| GAIF01000715.1 | 2.31   | 3.36   | 0       | 0      | 0      | 0      |
| GAIF01000718.1 | 20.56  | 10.91  | 13.69   | 53.04  | 81.99  | 11.99  |
| GAIF01000719.1 | 7.64   | 4.33   | 0.85    | 6.73   | 3.51   | 0.81   |
| GAIF01000720.1 | 66.21  | 95.82  | 63.06   | 54.4   | 4.35   | 13.09  |
| GAIF01000721.1 | 0.02   | 0      | 0       | 0.14   | 1.01   | 0.07   |
| GAIF01000722.1 | 0.28   | 1.72   | 0       | 0.76   | 0.94   | 0      |
| GAIF01000723.1 | 0.1    | 0      | 0.16    | 0      | 0      | 0      |
| GAIF01000725.1 | 0.25   | 0.31   | 0.55    | 0.87   | 1.12   | 0.04   |
| GAIF01000727.1 | 4.77   | 10.37  | 0       | 38.74  | 57.34  | 26.27  |
| GAIF01000728.1 | 0.04   | 0.04   | 0       | 0.08   | 0.21   | 0      |
| GAIF01000729.1 | 2.53   | 3.78   | 2.34    | 1.05   | 0.57   | 0.13   |
| GAIF01000730.1 | 0      | 0      | 0       | 0      | 0.44   | 0      |
| GAIF01000731.1 | 0      | 0      | 0.46    | 0.51   | 8.62   | 0      |
| GAIF01000732.1 | 0.17   | 0.09   | 0       | 0.1    | 0.3    | 0      |
| GAIF01000734.1 | 49.25  | 32.81  | 11.56   | 80.21  | 91.52  | 5.16   |
| GAIF01000735.1 | 8.18   | 4.55   | 3.31    | 1.07   | 2.81   | 1.21   |
| GAIF01000736.1 | 87.15  | 89.17  | 85.67   | 260.47 | 192.79 | 40.41  |

|                |         |         |         |         |        |        |
|----------------|---------|---------|---------|---------|--------|--------|
| GAIF01000737.1 | 0       | 0       | 0       | 0       | 0.07   | 0      |
| GAIF01000742.1 | 69.44   | 1.41    | 18.04   | 110.69  | 101.5  | 116.93 |
| GAIF01000745.1 | 1203.4  | 871.24  | 932.48  | 5.07    | 12.26  | 17.66  |
| GAIF01000747.1 | 28.37   | 19.17   | 5       | 46.54   | 45.56  | 4.85   |
| GAIF01000748.1 | 1.11    | 2.02    | 0.44    | 5.29    | 10.7   | 0.15   |
| GAIF01000751.1 | 1.08    | 0.78    | 0.26    | 5.58    | 6.79   | 0.13   |
| GAIF01000752.1 | 20.9    | 1.25    | 4.05    | 6.15    | 12.75  | 52.59  |
| GAIF01000754.1 | 0.3     | 0.28    | 0.28    | 0.53    | 0.24   | 0      |
| GAIF01000755.1 | 1.69    | 1.05    | 1.86    | 5.15    | 6.88   | 1.78   |
| GAIF01000756.1 | 1.8     | 0.76    | 0.33    | 7.64    | 19.68  | 0.33   |
| GAIF01000757.1 | 0.9     | 0       | 0       | 0.98    | 0.14   | 0      |
| GAIF01000760.1 | 0       | 0       | 0       | 0       | 0.16   | 0      |
| GAIF01000761.1 | 0.07    | 0       | 0       | 0       | 2      | 0      |
| GAIF01000762.1 | 60.82   | 132.38  | 109.13  | 41.68   | 59.82  | 44.37  |
| GAIF01000763.1 | 0.98    | 0.57    | 1.49    | 0.88    | 0.27   | 0.91   |
| GAIF01000764.1 | 0       | 0.05    | 0.03    | 0.08    | 0.98   | 0      |
| GAIF01000766.1 | 2343.57 | 2275.82 | 3797.64 | 1059.24 | 619.55 | 533.48 |
| GAIF01000767.1 | 5.59    | 10.35   | 1.42    | 13.9    | 19.68  | 5.81   |
| GAIF01000768.1 | 1.34    | 0.29    | 0.13    | 0       | 1      | 0.3    |
| GAIF01000769.1 | 0       | 0       | 0       | 0       | 0.09   | 0      |
| GAIF01000771.1 | 5.13    | 0.64    | 1.02    | 1.17    | 0.2    | 0.93   |
| GAIF01000772.1 | 0       | 0       | 0       | 1.61    | 0.9    | 0.21   |
| GAIF01000773.1 | 34.31   | 7.62    | 7.34    | 33.77   | 43.43  | 25.74  |
| GAIF01000774.1 | 5.25    | 5.48    | 6.35    | 1.14    | 0.8    | 0.43   |
| GAIF01000776.1 | 2.43    | 0.02    | 0       | 7.56    | 16.61  | 6.82   |
| GAIF01000777.1 | 0       | 0       | 0       | 0       | 0.88   | 0      |
| GAIF01000778.1 | 7.37    | 2.65    | 1.34    | 9.5     | 7.34   | 3.62   |
| GAIF01000779.1 | 5.86    | 6.8     | 5.06    | 9.58    | 12.17  | 1.96   |
| GAIF01000780.1 | 0.22    | 0.34    | 0.32    | 1.35    | 6.85   | 1      |
| GAIF01000781.1 | 35.01   | 15.74   | 7.58    | 42.49   | 16.63  | 0.69   |
| GAIF01000782.1 | 13.71   | 8.56    | 23.96   | 5.63    | 0.78   | 15.4   |
| GAIF01000783.1 | 1.72    | 0.13    | 0       | 4.8     | 23.14  | 2.54   |
| GAIF01000784.1 | 0       | 0       | 0       | 0       | 0.03   | 0      |
| GAIF01000785.1 | 0       | 0       | 0       | 1.79    | 3.12   | 0.1    |
| GAIF01000786.1 | 12.64   | 14.45   | 6.05    | 24.26   | 16.98  | 1.11   |
| GAIF01000787.1 | 21.3    | 18.56   | 2.39    | 51.64   | 61.84  | 0.65   |
| GAIF01000788.1 | 0.12    | 0       | 0       | 0       | 1.12   | 0      |
| GAIF01000792.1 | 0.05    | 0.03    | 0.05    | 0.05    | 0.12   | 0.55   |
| GAIF01000793.1 | 1.22    | 4.13    | 5.85    | 5.42    | 4.58   | 2.11   |
| GAIF01000794.1 | 0.21    | 0.12    | 0.2     | 2.43    | 8.34   | 0.09   |
| GAIF01000797.1 | 0.04    | 0       | 0       | 0.05    | 0      | 0      |
| GAIF01000798.1 | 0       | 0       | 0       | 0       | 1.23   | 0      |
| GAIF01000799.1 | 0       | 0       | 0       | 0.13    | 0.79   | 0      |
| GAIF01000800.1 | 0       | 0.11    | 0       | 0.34    | 3.05   | 0.22   |

|                |         |        |        |        |        |        |
|----------------|---------|--------|--------|--------|--------|--------|
| GAIF01000801.1 | 22.58   | 28.7   | 19.73  | 9.42   | 9      | 7.47   |
| GAIF01000803.1 | 0.4     | 0.29   | 0      | 3.12   | 11.31  | 0.15   |
| GAIF01000804.1 | 0.91    | 0.57   | 0.02   | 3.93   | 11.7   | 0.59   |
| GAIF01000806.1 | 16.53   | 14.36  | 21.97  | 38.27  | 21.07  | 15.19  |
| GAIF01000807.1 | 0.06    | 0.48   | 0.55   | 0.32   | 0.26   | 0.15   |
| GAIF01000808.1 | 3.22    | 4.12   | 4.15   | 1.09   | 1.33   | 0.66   |
| GAIF01000811.1 | 5.14    | 4.28   | 1.32   | 21.08  | 32.38  | 0.62   |
| GAIF01000812.1 | 8.28    | 5.56   | 2.29   | 40.97  | 31.65  | 2.13   |
| GAIF01000813.1 | 23.67   | 23.98  | 17.94  | 48.92  | 54.25  | 15.53  |
| GAIF01000814.1 | 0.07    | 0      | 0      | 0      | 0      | 0      |
| GAIF01000815.1 | 20.21   | 7.97   | 12.9   | 24.29  | 23.91  | 18.45  |
| GAIF01000817.1 | 0.35    | 0.24   | 0.07   | 0.3    | 0      | 0.14   |
| GAIF01000818.1 | 1.08    | 0.65   | 0.79   | 1.26   | 1.01   | 0.26   |
| GAIF01000819.1 | 0       | 0.59   | 1.02   | 0      | 0      | 0.34   |
| GAIF01000820.1 | 0.31    | 0.08   | 0.09   | 4.33   | 11.76  | 0.34   |
| GAIF01000821.1 | 0.14    | 0.15   | 0      | 0.14   | 1.07   | 0      |
| GAIF01000822.1 | 0.13    | 0.2    | 0      | 0.41   | 0.28   | 0      |
| GAIF01000823.1 | 0.13    | 0      | 0.14   | 0      | 0      | 0.24   |
| GAIF01000824.1 | 13.21   | 13.69  | 8.04   | 18.03  | 14.82  | 4.72   |
| GAIF01000825.1 | 2.75    | 1.71   | 1.72   | 0.57   | 1.06   | 0.65   |
| GAIF01000828.1 | 32.49   | 34.51  | 63.02  | 46.85  | 33.57  | 92.37  |
| GAIF01000829.1 | 1082.97 | 720.78 | 341.63 | 752.35 | 502.15 | 65.49  |
| GAIF01000830.1 | 30.95   | 58.09  | 13.78  | 73.31  | 67.64  | 4.08   |
| GAIF01000832.1 | 0.44    | 0.19   | 0      | 0.31   | 0      | 0      |
| GAIF01000835.1 | 0.23    | 0.05   | 0      | 1.62   | 12.35  | 0.45   |
| GAIF01000836.1 | 0.11    | 0      | 0      | 0      | 0      | 0      |
| GAIF01000839.1 | 0.12    | 0      | 0      | 0      | 0      | 0      |
| GAIF01000841.1 | 0       | 0      | 0      | 0.04   | 0      | 0      |
| GAIF01000842.1 | 0.33    | 0.38   | 0      | 0.25   | 1.48   | 0      |
| GAIF01000843.1 | 0.2     | 0      | 0      | 0      | 0      | 0.01   |
| GAIF01000844.1 | 7.99    | 1.59   | 1.07   | 42.58  | 122.45 | 125.76 |
| GAIF01000845.1 | 0.11    | 0      | 0      | 0.25   | 0      | 0.12   |
| GAIF01000846.1 | 0       | 0      | 0      | 0.05   | 0      | 0      |
| GAIF01000847.1 | 0       | 0      | 0      | 0      | 0      | 0.09   |
| GAIF01000848.1 | 0       | 0      | 0      | 0      | 0.15   | 0      |
| GAIF01000849.1 | 0.14    | 0      | 0      | 1.67   | 3.62   | 0      |
| GAIF01000851.1 | 6.67    | 2.42   | 2.38   | 8.23   | 20.46  | 45.77  |
| GAIF01000852.1 | 0       | 0      | 0      | 0.47   | 0      | 0      |
| GAIF01000853.1 | 5.22    | 3.93   | 6.12   | 18.42  | 16.74  | 8.67   |
| GAIF01000856.1 | 0.62    | 0.24   | 0.79   | 0.47   | 1.27   | 0.18   |
| GAIF01000859.1 | 10.2    | 11.35  | 13.84  | 28.89  | 22.09  | 5.47   |
| GAIF01000860.1 | 11.85   | 23.74  | 23.66  | 30.81  | 21.11  | 7.23   |
| GAIF01000861.1 | 0.15    | 0.47   | 0.61   | 0.93   | 0.97   | 0.59   |
| GAIF01000866.1 | 4.66    | 7.92   | 9.76   | 14.45  | 10.5   | 6.3    |

|                |       |       |        |       |       |       |
|----------------|-------|-------|--------|-------|-------|-------|
| GAIF01000867.1 | 2.71  | 1.59  | 0      | 7.7   | 20    | 6.06  |
| GAIF01000872.1 | 6.15  | 4.67  | 4.31   | 10.84 | 7.85  | 1.55  |
| GAIF01000873.1 | 1.72  | 2.61  | 2.82   | 0.2   | 0.41  | 0     |
| GAIF01000874.1 | 0     | 0.09  | 0      | 0     | 0.1   | 0     |
| GAIF01000875.1 | 0     | 0     | 0      | 0     | 0.09  | 0     |
| GAIF01000877.1 | 0.44  | 1.21  | 0.49   | 0.83  | 2.41  | 0     |
| GAIF01000878.1 | 1.59  | 1.38  | 0.42   | 1.92  | 4.81  | 0.28  |
| GAIF01000879.1 | 1.62  | 0.04  | 0      | 5.12  | 21.47 | 9.46  |
| GAIF01000880.1 | 2.51  | 0.7   | 0      | 3.06  | 4.16  | 0.27  |
| GAIF01000882.1 | 45.34 | 31.29 | 31.41  | 65.82 | 28.37 | 14.57 |
| GAIF01000883.1 | 0     | 0.13  | 0      | 0.27  | 0.99  | 0     |
| GAIF01000884.1 | 0.09  | 0.04  | 0      | 0.73  | 1.75  | 0     |
| GAIF01000885.1 | 130.4 | 63.79 | 166.27 | 89.92 | 28.91 | 75.86 |
| GAIF01000886.1 | 0     | 0     | 0      | 0.04  | 0.04  | 0.03  |
| GAIF01000887.1 | 0     | 0.14  | 0.13   | 0.87  | 0.42  | 0.73  |
| GAIF01000888.1 | 0.04  | 0     | 0      | 0     | 0     | 0.04  |
| GAIF01000889.1 | 1.45  | 0.27  | 0.06   | 5.01  | 1.27  | 6.21  |
| GAIF01000892.1 | 1.75  | 0.31  | 0.56   | 0.72  | 0.2   | 0.06  |
| GAIF01000893.1 | 9.61  | 5.58  | 4.51   | 2.95  | 1.53  | 0.32  |
| GAIF01000894.1 | 0     | 0     | 0      | 0     | 0.64  | 0     |
| GAIF01000896.1 | 24.41 | 20.07 | 16.34  | 65.78 | 57.85 | 11.28 |
| GAIF01000897.1 | 0.78  | 0.07  | 0      | 3.72  | 16.9  | 0.5   |
| GAIF01000899.1 | 21.88 | 19.67 | 22.25  | 45.65 | 39.45 | 16.12 |
| GAIF01000900.1 | 1.65  | 3.18  | 2.61   | 15.3  | 19.81 | 1.21  |
| GAIF01000901.1 | 22.69 | 32.12 | 26.95  | 19.38 | 12.36 | 4.56  |
| GAIF01000903.1 | 1.32  | 3.2   | 1.56   | 0.47  | 0.37  | 0     |
| GAIF01000904.1 | 0     | 0     | 0      | 0.11  | 0.29  | 0     |
| GAIF01000905.1 | 0     | 0     | 0      | 0.36  | 0.1   | 0     |
| GAIF01000906.1 | 4.25  | 2.37  | 0.13   | 6.27  | 20.03 | 1.39  |
| GAIF01000907.1 | 0     | 0.21  | 0.74   | 0     | 0     | 0.11  |
| GAIF01000908.1 | 0.05  | 0     | 0      | 0     | 0     | 0     |
| GAIF01000912.1 | 1.21  | 0     | 0.51   | 1.48  | 4.63  | 1.65  |
| GAIF01000913.1 | 0.41  | 0.44  | 0.27   | 0.47  | 0.29  | 0     |
| GAIF01000915.1 | 0     | 0     | 0      | 0     | 0.07  | 0     |
| GAIF01000916.1 | 0     | 0     | 0      | 0     | 0.6   | 0     |
| GAIF01000917.1 | 0     | 0     | 0      | 0     | 0     | 0.15  |
| GAIF01000918.1 | 33.49 | 20.54 | 15.55  | 7.81  | 7.23  | 1.1   |
| GAIF01000922.1 | 0.02  | 0     | 0      | 0.24  | 0.04  | 0.09  |
| GAIF01000923.1 | 30.41 | 40.51 | 30.64  | 87.74 | 84.29 | 30.68 |
| GAIF01000924.1 | 0.87  | 1.35  | 0.54   | 2.44  | 4.77  | 0.55  |
| GAIF01000925.1 | 5.71  | 2.12  | 1.01   | 20.55 | 44.45 | 14.61 |
| GAIF01000927.1 | 9.78  | 8.67  | 9.36   | 23.58 | 29.33 | 10.85 |
| GAIF01000928.1 | 18.63 | 9.38  | 18.16  | 23.04 | 34.74 | 87.03 |
| GAIF01000929.1 | 6.71  | 2.02  | 1.34   | 15.16 | 26.61 | 16.04 |

|                |        |       |        |        |        |        |
|----------------|--------|-------|--------|--------|--------|--------|
| GAIF01000931.1 | 0      | 0.09  | 0      | 0      | 0      | 0      |
| GAIF01000932.1 | 0      | 0     | 0      | 0.21   | 0      | 0      |
| GAIF01000935.1 | 144.21 | 143.1 | 247.12 | 0      | 0.26   | 0.08   |
| GAIF01000936.1 | 4.15   | 5.02  | 5.9    | 12.47  | 12.69  | 2.6    |
| GAIF01000937.1 | 0      | 0     | 0      | 0.49   | 0      | 0      |
| GAIF01000940.1 | 0.2    | 0.38  | 0      | 0.78   | 0.77   | 0      |
| GAIF01000942.1 | 9.73   | 8.22  | 9.23   | 20.45  | 10.6   | 5.97   |
| GAIF01000943.1 | 0      | 0.06  | 0      | 0      | 0      | 0      |
| GAIF01000944.1 | 0      | 0     | 0      | 0      | 0.06   | 0      |
| GAIF01000945.1 | 0      | 0.18  | 0.12   | 0      | 0.53   | 0      |
| GAIF01000946.1 | 0      | 0     | 0      | 0      | 0      | 0.05   |
| GAIF01000947.1 | 0      | 0     | 0      | 0.35   | 0.52   | 0.04   |
| GAIF01000952.1 | 0      | 0.04  | 0.01   | 0.11   | 0.61   | 0      |
| GAIF01000954.1 | 36.52  | 56.45 | 39.41  | 77.02  | 83.78  | 14.69  |
| GAIF01000957.1 | 0      | 0     | 0      | 0      | 0.34   | 0      |
| GAIF01000958.1 | 0      | 0.61  | 1.93   | 0      | 0      | 0.35   |
| GAIF01000959.1 | 62.77  | 73.76 | 43.25  | 145.77 | 119.12 | 10.36  |
| GAIF01000960.1 | 4.71   | 3.62  | 4.23   | 6.87   | 3.53   | 3.74   |
| GAIF01000961.1 | 8.91   | 7.39  | 5.9    | 39.42  | 29.37  | 5.23   |
| GAIF01000962.1 | 0.64   | 0.94  | 0.87   | 1.1    | 0.97   | 0.72   |
| GAIF01000964.1 | 0      | 0.07  | 0.61   | 0.45   | 0.22   | 0.2    |
| GAIF01000966.1 | 25.19  | 18.02 | 32.93  | 27.5   | 14.75  | 6.21   |
| GAIF01000967.1 | 10.24  | 6.41  | 2.81   | 21.32  | 28.63  | 1.04   |
| GAIF01000968.1 | 0.14   | 25.75 | 81.32  | 0.78   | 7.07   | 11.92  |
| GAIF01000970.1 | 0      | 0     | 0      | 0.1    | 0      | 0      |
| GAIF01000971.1 | 0.97   | 0.81  | 0.67   | 4.92   | 10.91  | 0.76   |
| GAIF01000972.1 | 29.12  | 25.13 | 26.66  | 115.96 | 142.35 | 44.4   |
| GAIF01000973.1 | 6.52   | 5.61  | 5.82   | 11.32  | 14.44  | 4.03   |
| GAIF01000974.1 | 0      | 0     | 0.2    | 0.14   | 0.5    | 0.07   |
| GAIF01000975.1 | 34.75  | 22.78 | 23.44  | 96.87  | 46.33  | 45.73  |
| GAIF01000976.1 | 2.45   | 5.18  | 3.78   | 8.69   | 5.08   | 5.16   |
| GAIF01000977.1 | 3.49   | 0     | 0      | 16.86  | 16.24  | 21.66  |
| GAIF01000978.1 | 0.09   | 0.1   | 0      | 0.11   | 0      | 0.1    |
| GAIF01000979.1 | 0.33   | 0.07  | 0      | 0.23   | 0.16   | 0      |
| GAIF01000981.1 | 5.2    | 3.38  | 3.41   | 10.14  | 61.07  | 1.85   |
| GAIF01000982.1 | 0.43   | 1.16  | 1.08   | 3.06   | 4.56   | 0.38   |
| GAIF01000984.1 | 23.42  | 26.46 | 21.41  | 29.26  | 35.23  | 32.98  |
| GAIF01000986.1 | 1.19   | 0.77  | 0.07   | 0.94   | 1.28   | 0.19   |
| GAIF01000989.1 | 58.18  | 33.09 | 22.88  | 66.74  | 109.78 | 81.3   |
| GAIF01000990.1 | 17.71  | 20.57 | 0.01   | 25.72  | 18.29  | 0      |
| GAIF01000993.1 | 142.36 | 48.88 | 180.97 | 191.31 | 108.13 | 578.01 |
| GAIF01000995.1 | 0.19   | 0.21  | 0.05   | 2.83   | 5.87   | 0.16   |
| GAIF01000996.1 | 13.54  | 5.34  | 4.96   | 16.98  | 28.91  | 27.08  |
| GAIF01000999.1 | 0.14   | 0.05  | 0      | 0.58   | 1.2    | 0      |



|                |        |        |        |        |        |        |
|----------------|--------|--------|--------|--------|--------|--------|
| GAIF01001001.1 | 0.15   | 0      | 0      | 0.88   | 4.74   | 0      |
| GAIF01001002.1 | 0      | 0      | 0      | 0.12   | 1.57   | 0.11   |
| GAIF01001005.1 | 3.32   | 0      | 0.56   | 13.51  | 19.86  | 0      |
| GAIF01001006.1 | 0      | 0      | 0      | 0      | 0.14   | 0      |
| GAIF01001008.1 | 7.34   | 1.4    | 0      | 13     | 18.88  | 4.08   |
| GAIF01001011.1 | 0      | 0      | 0      | 0.05   | 0.21   | 0      |
| GAIF01001014.1 | 1.14   | 0.87   | 0.85   | 0.13   | 0.49   | 0.5    |
| GAIF01001015.1 | 6.87   | 4.46   | 1.6    | 0      | 16.12  | 4.81   |
| GAIF01001017.1 | 1.58   | 0.9    | 0.56   | 8.9    | 27.97  | 0.28   |
| GAIF01001018.1 | 0.32   | 0      | 0.25   | 1.76   | 6.31   | 0.65   |
| GAIF01001019.1 | 0.58   | 0      | 0      | 0.79   | 5.15   | 2.76   |
| GAIF01001021.1 | 0.13   | 0      | 0      | 0      | 0      | 0      |
| GAIF01001022.1 | 0      | 0.15   | 0      | 0      | 0      | 0      |
| GAIF01001023.1 | 3.02   | 2.28   | 3.06   | 6.29   | 5.72   | 1.43   |
| GAIF01001024.1 | 0.14   | 0.23   | 0.1    | 0      | 0.06   | 0.09   |
| GAIF01001026.1 | 0      | 0      | 0      | 0      | 0.23   | 0      |
| GAIF01001027.1 | 4.99   | 4.83   | 6.17   | 13.15  | 9.38   | 9.29   |
| GAIF01001029.1 | 0      | 0      | 0      | 0      | 0.04   | 0      |
| GAIF01001031.1 | 1.54   | 0.19   | 0.31   | 7.17   | 23.97  | 4.7    |
| GAIF01001032.1 | 1.77   | 0.48   | 0.44   | 7.12   | 15.78  | 1.69   |
| GAIF01001034.1 | 6.38   | 5.97   | 5.86   | 5.99   | 2.04   | 2.96   |
| GAIF01001035.1 | 0      | 0.27   | 0      | 5.88   | 13.61  | 0.4    |
| GAIF01001037.1 | 184.05 | 211.83 | 466.64 | 206.95 | 153.19 | 236.49 |
| GAIF01001038.1 | 6.21   | 7.42   | 6.37   | 7.45   | 5.83   | 0.45   |
| GAIF01001040.1 | 9.62   | 10.38  | 11.77  | 8.18   | 12.71  | 5.42   |
| GAIF01001041.1 | 169.8  | 564.93 | 603.02 | 5.61   | 18.77  | 50.3   |
| GAIF01001042.1 | 0.16   | 0      | 0      | 1.15   | 10.69  | 0.73   |
| GAIF01001043.1 | 0      | 13.57  | 11.44  | 0.14   | 0.55   | 3.61   |
| GAIF01001044.1 | 0.03   | 0      | 0      | 0.11   | 0.88   | 0.11   |
| GAIF01001045.1 | 0.27   | 0      | 0      | 0      | 0      | 0      |
| GAIF01001047.1 | 0      | 0.1    | 0      | 0      | 0.11   | 0      |
| GAIF01001048.1 | 0.27   | 0.15   | 0      | 0.05   | 0      | 0      |
| GAIF01001049.1 | 0.23   | 0      | 0      | 0      | 0      | 0      |
| GAIF01001050.1 | 1.01   | 0.11   | 0      | 3.35   | 10.07  | 0.61   |
| GAIF01001051.1 | 1      | 0.2    | 0      | 3.36   | 15.56  | 0.3    |
| GAIF01001052.1 | 352.3  | 793.79 | 491.5  | 72.48  | 78.58  | 123.23 |
| GAIF01001054.1 | 1.87   | 3.37   | 0.35   | 10.94  | 19.5   | 0.1    |
| GAIF01001055.1 | 3.55   | 2.95   | 2.41   | 4      | 4.77   | 3.91   |
| GAIF01001056.1 | 1.61   | 0.22   | 0.08   | 7.88   | 7.96   | 0.25   |
| GAIF01001057.1 | 0      | 0      | 0      | 0      | 0.66   | 0      |
| GAIF01001058.1 | 0.09   | 0.1    | 0.1    | 0      | 0      | 0      |
| GAIF01001062.1 | 2.34   | 2.17   | 0.9    | 2.04   | 0.99   | 1.16   |
| GAIF01001065.1 | 6.15   | 4.89   | 5.58   | 1.78   | 0.57   | 0.78   |
| GAIF01001066.1 | 9.8    | 7.66   | 4.65   | 0.89   | 0.9    | 0.36   |

|                |        |        |        |        |        |        |
|----------------|--------|--------|--------|--------|--------|--------|
| GAIF01001068.1 | 7.39   | 3.59   | 3.97   | 1.83   | 1.51   | 0.17   |
| GAIF01001069.1 | 0      | 0      | 0.63   | 0.4    | 0.34   | 0      |
| GAIF01001070.1 | 0      | 0      | 0      | 0      | 0.07   | 0      |
| GAIF01001071.1 | 0.28   | 0.15   | 0      | 0.8    | 0.33   | 0      |
| GAIF01001073.1 | 10.97  | 3.42   | 15.4   | 4.02   | 4.28   | 6.13   |
| GAIF01001074.1 | 33.08  | 17.23  | 7.71   | 95.69  | 95.64  | 7.47   |
| GAIF01001075.1 | 5.1    | 3.34   | 2.9    | 1.9    | 2.1    | 0.17   |
| GAIF01001076.1 | 4.09   | 4.29   | 2.68   | 2.51   | 0.85   | 0.1    |
| GAIF01001079.1 | 6.45   | 5.71   | 10.82  | 15.82  | 11.96  | 15.02  |
| GAIF01001080.1 | 12.61  | 9.44   | 1.99   | 7.53   | 29.19  | 4.34   |
| GAIF01001081.1 | 0.04   | 0      | 0.04   | 0      | 0.17   | 0.04   |
| GAIF01001084.1 | 9.6    | 0      | 0.74   | 5.21   | 0.6    | 1.31   |
| GAIF01001085.1 | 0.72   | 4.26   | 0.26   | 1.24   | 6.15   | 1.06   |
| GAIF01001086.1 | 0      | 0      | 0      | 0      | 3.13   | 0      |
| GAIF01001087.1 | 0.21   | 0      | 0.23   | 3.14   | 10.65  | 0.34   |
| GAIF01001088.1 | 5.52   | 1.28   | 3.37   | 2.09   | 2.13   | 1.49   |
| GAIF01001089.1 | 514.21 | 595.82 | 542.64 | 766.51 | 467.2  | 236.79 |
| GAIF01001090.1 | 0.07   | 0      | 0      | 0      | 0      | 0      |
| GAIF01001091.1 | 12.59  | 8.72   | 11.87  | 19.91  | 10.09  | 26.31  |
| GAIF01001092.1 | 0      | 0      | 0.06   | 0      | 0      | 0      |
| GAIF01001094.1 | 14.85  | 21.67  | 19.35  | 31.44  | 12.03  | 14.93  |
| GAIF01001095.1 | 0      | 0      | 0      | 0.3    | 0.63   | 0      |
| GAIF01001096.1 | 0      | 0      | 0      | 0.08   | 0.04   | 0      |
| GAIF01001097.1 | 48.26  | 63.34  | 25.26  | 108.77 | 107.06 | 12.37  |
| GAIF01001098.1 | 5.15   | 3.67   | 0.39   | 9.06   | 15.37  | 0.39   |
| GAIF01001099.1 | 0.3    | 0      | 0      | 1.47   | 7.15   | 0.27   |
| GAIF01001100.1 | 40.73  | 14.91  | 9.91   | 5.2    | 5.22   | 10.41  |
| GAIF01001101.1 | 0.04   | 0.05   | 0      | 0.4    | 0.33   | 0.05   |
| GAIF01001102.1 | 1.81   | 1.53   | 2.53   | 1.69   | 2.02   | 3.28   |
| GAIF01001103.1 | 0      | 0      | 0      | 0      | 0.07   | 0      |
| GAIF01001104.1 | 12.51  | 29.02  | 17.84  | 5.37   | 4.5    | 1.09   |
| GAIF01001105.1 | 25.42  | 0.14   | 0.61   | 11.74  | 0      | 0.42   |
| GAIF01001108.1 | 31.87  | 32.41  | 26.74  | 62.55  | 52.79  | 12.05  |
| GAIF01001111.1 | 0.09   | 0.12   | 0.13   | 0.19   | 0.16   | 0.08   |
| GAIF01001112.1 | 1.66   | 0.47   | 0.99   | 3.79   | 0.57   | 2.61   |
| GAIF01001115.1 | 5.99   | 0.71   | 0.32   | 23.81  | 80.67  | 21.8   |
| GAIF01001116.1 | 0      | 0      | 0      | 0      | 0      | 0.16   |
| GAIF01001117.1 | 122.59 | 153.57 | 138.59 | 201.41 | 128.34 | 45.56  |
| GAIF01001121.1 | 4.02   | 3.08   | 3.07   | 10.14  | 2.81   | 3.72   |
| GAIF01001122.1 | 0      | 0.15   | 0      | 0.81   | 6.81   | 4.79   |
| GAIF01001123.1 | 10.75  | 8.37   | 11.71  | 24.73  | 28.4   | 12.97  |
| GAIF01001124.1 | 0      | 0      | 0      | 0.12   | 1.68   | 0.24   |
| GAIF01001125.1 | 20.05  | 18.26  | 1.69   | 20.11  | 33.15  | 3.4    |
| GAIF01001126.1 | 0.31   | 0.02   | 0.52   | 1.36   | 5.98   | 0.36   |

|                |        |        |        |        |        |        |
|----------------|--------|--------|--------|--------|--------|--------|
| GAIF01001127.1 | 3.97   | 4.83   | 3.48   | 2.03   | 2.86   | 0.87   |
| GAIF01001128.1 | 58.53  | 73.88  | 78.57  | 42.55  | 27.15  | 26.03  |
| GAIF01001129.1 | 4.18   | 0.98   | 1.27   | 6.13   | 6.54   | 3.93   |
| GAIF01001131.1 | 26.48  | 20.5   | 16.96  | 30.56  | 30.67  | 5.25   |
| GAIF01001132.1 | 0.11   | 0.12   | 0.87   | 0.26   | 0      | 0      |
| GAIF01001133.1 | 0      | 0      | 0      | 0.19   | 0      | 0      |
| GAIF01001134.1 | 0      | 0      | 0      | 0.16   | 0.4    | 0.15   |
| GAIF01001137.1 | 3.59   | 3.68   | 0.15   | 6.69   | 15.94  | 4.79   |
| GAIF01001138.1 | 0      | 0.12   | 0      | 0.13   | 0.07   | 0      |
| GAIF01001139.1 | 0.49   | 0      | 0.33   | 1.51   | 8.61   | 1.51   |
| GAIF01001140.1 | 0.09   | 0      | 0      | 0      | 0      | 0      |
| GAIF01001141.1 | 2.18   | 6.82   | 2.33   | 10.28  | 9.37   | 0.31   |
| GAIF01001143.1 | 1.19   | 0      | 0.15   | 3.14   | 9.32   | 6.31   |
| GAIF01001144.1 | 0      | 0      | 0      | 0.06   | 0.04   | 0      |
| GAIF01001146.1 | 0.35   | 0.07   | 0.07   | 1.07   | 7.75   | 0.29   |
| GAIF01001147.1 | 60.68  | 59.59  | 31.69  | 26.4   | 22.05  | 9.52   |
| GAIF01001149.1 | 1.02   | 1.66   | 1.12   | 7.32   | 17.86  | 0      |
| GAIF01001150.1 | 0.98   | 0      | 0      | 5.46   | 0.47   | 0      |
| GAIF01001151.1 | 0.07   | 0      | 0.02   | 0.4    | 1.82   | 0.21   |
| GAIF01001152.1 | 69.77  | 80.13  | 85.1   | 543.88 | 566.51 | 76.89  |
| GAIF01001153.1 | 0.14   | 0      | 0      | 0.54   | 3.53   | 0      |
| GAIF01001157.1 | 0.02   | 0.01   | 0      | 0      | 0      | 0.04   |
| GAIF01001158.1 | 9.06   | 17.68  | 11.41  | 29.86  | 14.75  | 3.38   |
| GAIF01001160.1 | 1.57   | 0      | 0.42   | 0      | 0      | 0      |
| GAIF01001161.1 | 0.39   | 0      | 0      | 0      | 0      | 0.92   |
| GAIF01001162.1 | 899.94 | 1981.6 | 1942.8 | 992.79 | 511.78 | 318    |
| GAIF01001164.1 | 8.32   | 13.88  | 15.95  | 32.24  | 17.76  | 5.47   |
| GAIF01001165.1 | 0.19   | 0.1    | 0      | 1.52   | 7.89   | 1.34   |
| GAIF01001166.1 | 0.78   | 0.96   | 0.23   | 1.23   | 1.53   | 0.2    |
| GAIF01001167.1 | 88.39  | 35.79  | 28.13  | 132.07 | 211.15 | 236.71 |
| GAIF01001169.1 | 20.98  | 8.55   | 23.03  | 54.78  | 37.84  | 31.79  |
| GAIF01001170.1 | 8.21   | 6.3    | 6.36   | 15.25  | 16.79  | 1.95   |
| GAIF01001172.1 | 30.65  | 5.58   | 1.74   | 15     | 14.08  | 14.57  |
| GAIF01001173.1 | 1.21   | 0      | 0.44   | 0.23   | 0.48   | 0.22   |
| GAIF01001174.1 | 0      | 0      | 0      | 0.12   | 0      | 0      |
| GAIF01001176.1 | 0      | 0      | 0      | 0      | 0.65   | 0      |
| GAIF01001177.1 | 6.07   | 5.19   | 6.3    | 22.62  | 24.05  | 4.12   |
| GAIF01001178.1 | 0      | 0      | 0      | 0.21   | 0.64   | 0.07   |
| GAIF01001179.1 | 0.3    | 0.11   | 0.74   | 0.26   | 0.05   | 0.87   |
| GAIF01001182.1 | 6.18   | 6.41   | 0.98   | 1      | 0.24   | 0.06   |
| GAIF01001183.1 | 0.57   | 0.76   | 0.28   | 0.96   | 0.31   | 0      |
| GAIF01001185.1 | 33.31  | 35.71  | 39.81  | 31.02  | 22     | 37.58  |
| GAIF01001186.1 | 0.81   | 0.75   | 1.04   | 0.85   | 0.49   | 0.35   |
| GAIF01001187.1 | 0.22   | 0.48   | 0.84   | 0.64   | 0.13   | 0.12   |

|                |       |       |       |       |       |        |
|----------------|-------|-------|-------|-------|-------|--------|
| GAIF01001188.1 | 0     | 0.2   | 0     | 2.26  | 5.58  | 0.41   |
| GAIF01001189.1 | 0.02  | 0     | 0     | 0     | 0     | 0      |
| GAIF01001190.1 | 5.05  | 2.77  | 2.16  | 21.58 | 27.96 | 2.26   |
| GAIF01001191.1 | 0.12  | 0.11  | 0     | 0.46  | 0.25  | 0      |
| GAIF01001192.1 | 21.69 | 24.55 | 4.45  | 0.22  | 0.45  | 0.21   |
| GAIF01001194.1 | 0.81  | 0.18  | 0     | 1.87  | 6.39  | 0.18   |
| GAIF01001198.1 | 5.58  | 1.52  | 0     | 2.2   | 4.59  | 0.86   |
| GAIF01001199.1 | 0     | 0.12  | 1.37  | 0.66  | 3.14  | 0.25   |
| GAIF01001200.1 | 0.12  | 0.46  | 0.27  | 0.42  | 0.8   | 0.07   |
| GAIF01001201.1 | 22.02 | 5.76  | 8.71  | 40.22 | 14.16 | 2.01   |
| GAIF01001202.1 | 0     | 0.07  | 0     | 0.38  | 0.51  | 0      |
| GAIF01001203.1 | 0.54  | 0.46  | 0.49  | 0     | 0.26  | 0.52   |
| GAIF01001204.1 | 0     | 0     | 0.18  | 0.59  | 2.83  | 0      |
| GAIF01001205.1 | 0     | 0     | 0.04  | 0     | 0.04  | 0      |
| GAIF01001206.1 | 0     | 0     | 0     | 0.23  | 0.68  | 0      |
| GAIF01001207.1 | 19.21 | 18.1  | 13.93 | 49.68 | 60.97 | 10.06  |
| GAIF01001208.1 | 0     | 0     | 0     | 0     | 0.08  | 0      |
| GAIF01001209.1 | 27.13 | 13.82 | 5.58  | 63.34 | 53.28 | 21.78  |
| GAIF01001210.1 | 0.3   | 0.55  | 0     | 1.13  | 1.97  | 0      |
| GAIF01001211.1 | 0     | 0     | 0     | 0.82  | 0.55  | 0      |
| GAIF01001213.1 | 0.59  | 0     | 0     | 0.51  | 0.89  | 0.16   |
| GAIF01001214.1 | 0.06  | 0     | 0     | 0.28  | 0.79  | 0      |
| GAIF01001215.1 | 0.62  | 0     | 0.29  | 1.44  | 7.37  | 4.4    |
| GAIF01001216.1 | 0.25  | 1.21  | 1.09  | 1.43  | 1.49  | 0.14   |
| GAIF01001217.1 | 4.63  | 2.11  | 1.39  | 12.52 | 22.09 | 1.3    |
| GAIF01001219.1 | 164.5 | 40.57 | 99.63 | 69.89 | 66.04 | 561.35 |
| GAIF01001220.1 | 0     | 0.3   | 0     | 0     | 0     | 0      |
| GAIF01001221.1 | 0     | 0     | 0     | 0.3   | 0.31  | 0      |
| GAIF01001222.1 | 0     | 0.15  | 0     | 0     | 0.54  | 0      |
| GAIF01001223.1 | 0.88  | 0.43  | 0.32  | 0     | 0.24  | 0.11   |
| GAIF01001224.1 | 0.81  | 0.11  | 0.22  | 2.35  | 11.68 | 6.91   |
| GAIF01001228.1 | 15.69 | 15.48 | 15.57 | 30.97 | 19.33 | 6.52   |
| GAIF01001229.1 | 1.02  | 0     | 0.09  | 3.85  | 21.08 | 7.88   |
| GAIF01001230.1 | 0     | 0     | 0     | 0     | 0.07  | 0      |
| GAIF01001231.1 | 25.18 | 17.05 | 20.22 | 33.39 | 35.89 | 30.22  |
| GAIF01001232.1 | 17.06 | 34.19 | 8.93  | 44.97 | 27.83 | 0.01   |
| GAIF01001234.1 | 0.03  | 0     | 0.03  | 0.33  | 0.23  | 0.1    |
| GAIF01001237.1 | 0     | 0     | 0.3   | 0     | 0.26  | 0      |
| GAIF01001238.1 | 0.61  | 0     | 0     | 1.77  | 4.65  | 6.05   |
| GAIF01001240.1 | 26.35 | 18.08 | 14.5  | 30.3  | 25.01 | 33.05  |
| GAIF01001241.1 | 1.81  | 1.43  | 1.45  | 1.91  | 1.78  | 0.36   |
| GAIF01001242.1 | 0     | 0     | 0     | 0     | 0.09  | 0      |
| GAIF01001243.1 | 0     | 0     | 0     | 0     | 0.39  | 0      |
| GAIF01001244.1 | 4.2   | 4.85  | 2.78  | 1.48  | 1.06  | 0.93   |

|                |         |        |        |        |         |         |
|----------------|---------|--------|--------|--------|---------|---------|
| GAIF01001247.1 | 264.6   | 281.13 | 659.29 | 194.31 | 125.71  | 431.01  |
| GAIF01001249.1 | 0.15    | 0      | 0      | 0.35   | 0       | 0       |
| GAIF01001251.1 | 50.78   | 26.81  | 35.44  | 32.74  | 20.35   | 10.13   |
| GAIF01001252.1 | 17.56   | 8.76   | 7.51   | 25.2   | 29.94   | 8.16    |
| GAIF01001257.1 | 0.84    | 0.17   | 0.08   | 0.09   | 1.29    | 0       |
| GAIF01001258.1 | 0.17    | 0.12   | 0.12   | 1.57   | 8.63    | 0.12    |
| GAIF01001259.1 | 0       | 0      | 0      | 0.16   | 0.16    | 0.59    |
| GAIF01001260.1 | 53.32   | 43.46  | 40.02  | 94.79  | 62.18   | 31.57   |
| GAIF01001267.1 | 0.7     | 0.5    | 1.17   | 2.26   | 0.46    | 6.36    |
| GAIF01001268.1 | 0       | 0      | 0      | 0      | 0.01    | 0       |
| GAIF01001269.1 | 0.12    | 0.09   | 0.03   | 0.12   | 0.07    | 0.02    |
| GAIF01001273.1 | 0.96    | 0.72   | 0.33   | 1.54   | 1.96    | 0       |
| GAIF01001276.1 | 0       | 7.72   | 3.4    | 0      | 0       | 1.71    |
| GAIF01001277.1 | 0       | 0      | 0      | 0      | 0       | 0.24    |
| GAIF01001282.1 | 12.91   | 22.72  | 20.56  | 0.67   | 0.47    | 1.84    |
| GAIF01001283.1 | 8.24    | 9.12   | 13.31  | 18.04  | 9.53    | 12.84   |
| GAIF01001285.1 | 3.12    | 4.15   | 4.7    | 1.21   | 1.11    | 2.42    |
| GAIF01001286.1 | 3.93    | 0.16   | 0      | 5.89   | 29.41   | 7.8     |
| GAIF01001287.1 | 1.04    | 0.17   | 0      | 1.51   | 0.82    | 1.8     |
| GAIF01001288.1 | 33.47   | 44.16  | 28.29  | 6.01   | 3.37    | 2.16    |
| GAIF01001290.1 | 1.28    | 0.25   | 0.51   | 0      | 0       | 0       |
| GAIF01001291.1 | 0.66    | 0.13   | 0.1    | 1.2    | 1.38    | 0.99    |
| GAIF01001292.1 | 1.15    | 1.82   | 1.66   | 2.89   | 1.39    | 0.18    |
| GAIF01001293.1 | 17.86   | 12.56  | 2.75   | 26.43  | 62.94   | 2.22    |
| GAIF01001294.1 | 0       | 0      | 0.07   | 0      | 0       | 0       |
| GAIF01001295.1 | 0       | 0      | 0      | 0      | 0.12    | 0       |
| GAIF01001297.1 | 0       | 0      | 0      | 0      | 0.12    | 0       |
| GAIF01001298.1 | 4.25    | 3.79   | 3.75   | 14.42  | 8.11    | 7.38    |
| GAIF01001299.1 | 0       | 0      | 0.32   | 0      | 0.1     | 0       |
| GAIF01001301.1 | 16.44   | 16.66  | 14.91  | 124.72 | 126.01  | 12.63   |
| GAIF01001302.1 | 12.43   | 10.31  | 2.31   | 30.31  | 62.06   | 0.93    |
| GAIF01001303.1 | 13.56   | 9.89   | 10.47  | 7.01   | 4.63    | 2.89    |
| GAIF01001305.1 | 0       | 0      | 0.05   | 0      | 0       | 0       |
| GAIF01001306.1 | 0       | 0      | 1.65   | 0.64   | 1.41    | 0       |
| GAIF01001309.1 | 3.51    | 2.8    | 0.3    | 24.88  | 41.41   | 1.04    |
| GAIF01001310.1 | 0.23    | 0.13   | 0      | 0.27   | 2.66    | 0.26    |
| GAIF01001311.1 | 13.58   | 19.89  | 5.53   | 32.27  | 29.78   | 0.26    |
| GAIF01001314.1 | 686.86  | 374.36 | 681.31 | 2837.1 | 1875.62 | 5507.43 |
| GAIF01001315.1 | 0.37    | 0.22   | 0.19   | 0.53   | 0.45    | 0.03    |
| GAIF01001317.1 | 2369.08 | 818.23 | 608.8  | 153.76 | 156.64  | 375.86  |
| GAIF01001318.1 | 0.27    | 0      | 0      | 0.16   | 0       | 0       |
| GAIF01001319.1 | 17.46   | 16.4   | 13.57  | 9.21   | 3.27    | 0.75    |
| GAIF01001320.1 | 0       | 0      | 0      | 2.27   | 1.49    | 0.18    |
| GAIF01001322.1 | 0       | 0      | 0      | 0      | 0.17    | 0       |

|                |        |        |        |        |         |         |
|----------------|--------|--------|--------|--------|---------|---------|
| GAIF01001323.1 | 0      | 0      | 0      | 0.21   | 1.21    | 0       |
| GAIF01001324.1 | 0      | 0.13   | 0.06   | 0.07   | 0.07    | 0       |
| GAIF01001326.1 | 0      | 0      | 0      | 0.5    | 3.31    | 0.04    |
| GAIF01001328.1 | 0      | 0      | 0      | 0      | 0.31    | 7.53    |
| GAIF01001329.1 | 0      | 0      | 0.11   | 0      | 1       | 0       |
| GAIF01001330.1 | 0      | 0.17   | 0      | 0.49   | 0.05    | 0       |
| GAIF01001331.1 | 0.09   | 0.09   | 0      | 0.05   | 0       | 0       |
| GAIF01001332.1 | 8.43   | 16.76  | 14.33  | 27.25  | 17.38   | 3.23    |
| GAIF01001333.1 | 0.45   | 0.28   | 0.08   | 0      | 0.08    | 0.08    |
| GAIF01001334.1 | 0.69   | 0.11   | 0      | 2.42   | 21.77   | 16.01   |
| GAIF01001335.1 | 9.4    | 20.97  | 9.72   | 31.77  | 37.4    | 1.94    |
| GAIF01001337.1 | 0      | 0      | 0      | 0      | 0.12    | 0       |
| GAIF01001339.1 | 3.61   | 2.49   | 0.98   | 0.77   | 0.31    | 0.14    |
| GAIF01001340.1 | 24.98  | 0      | 7.71   | 20.29  | 31.54   | 4.82    |
| GAIF01001341.1 | 0      | 0.2    | 0.61   | 0      | 0       | 0.2     |
| GAIF01001343.1 | 0.97   | 0.19   | 1.07   | 0.91   | 1.64    | 1.07    |
| GAIF01001344.1 | 0.14   | 0      | 0      | 0      | 0.15    | 0       |
| GAIF01001345.1 | 0      | 0      | 0      | 0      | 0.18    | 0       |
| GAIF01001346.1 | 36.87  | 41.66  | 24.49  | 9.38   | 13.73   | 19.34   |
| GAIF01001347.1 | 0.1    | 0.28   | 0.12   | 0.5    | 0.83    | 0       |
| GAIF01001350.1 | 0.88   | 0.31   | 0      | 8.98   | 28.04   | 0       |
| GAIF01001355.1 | 0      | 0      | 0      | 0.48   | 0.25    | 0       |
| GAIF01001356.1 | 1.42   | 0.46   | 0      | 7.58   | 24.46   | 0.37    |
| GAIF01001359.1 | 5.65   | 3.46   | 3.56   | 10.48  | 24.35   | 5.02    |
| GAIF01001362.1 | 0.17   | 0      | 0      | 0.1    | 0       | 0       |
| GAIF01001364.1 | 23.28  | 18.79  | 16.79  | 12.26  | 9.96    | 5.28    |
| GAIF01001365.1 | 0      | 0      | 0.25   | 0      | 0       | 0       |
| GAIF01001366.1 | 12.71  | 27.79  | 8.01   | 72.04  | 81.58   | 18.2    |
| GAIF01001367.1 | 0.19   | 0.07   | 0.17   | 0.15   | 0.42    | 0.12    |
| GAIF01001368.1 | 454.32 | 151.72 | 51.88  | 26.93  | 18.25   | 6.49    |
| GAIF01001369.1 | 2      | 1.54   | 1.59   | 12.76  | 28.76   | 1.28    |
| GAIF01001370.1 | 8.25   | 3.59   | 2.98   | 15.73  | 18.89   | 5.99    |
| GAIF01001371.1 | 1.83   | 4.72   | 2.76   | 10.61  | 10.63   | 0.67    |
| GAIF01001373.1 | 21.99  | 60.43  | 0.97   | 41.69  | 50.4    | 0.11    |
| GAIF01001375.1 | 0      | 0      | 0      | 0.77   | 3.03    | 0.07    |
| GAIF01001376.1 | 0.7    | 0.26   | 0.23   | 4.43   | 22.94   | 1.25    |
| GAIF01001377.1 | 0.12   | 0      | 0.05   | 0.61   | 0       | 0       |
| GAIF01001381.1 | 0      | 0      | 0.12   | 0.25   | 2.44    | 0.24    |
| GAIF01001382.1 | 0.55   | 0      | 0      | 1.72   | 2.6     | 0.37    |
| GAIF01001383.1 | 761.98 | 50.7   | 147.09 | 359.6  | 146.41  | 1651.64 |
| GAIF01001385.1 | 5.28   | 2.38   | 4.8    | 14.34  | 10.99   | 22.41   |
| GAIF01001386.1 | 556.87 | 358.12 | 288.04 | 1411.9 | 2349.43 | 119.76  |
| GAIF01001387.1 | 33.12  | 0      | 0.01   | 0.02   | 18.57   | 31.6    |
| GAIF01001388.1 | 0      | 0.14   | 0      | 0.1    | 0.36    | 0.05    |

|                |       |       |       |        |        |        |
|----------------|-------|-------|-------|--------|--------|--------|
| GAIF01001389.1 | 0     | 0     | 0     | 0      | 0.08   | 0      |
| GAIF01001391.1 | 0     | 0     | 0     | 0      | 0.92   | 0      |
| GAIF01001392.1 | 0.73  | 0.64  | 1.46  | 0.7    | 1.23   | 0.14   |
| GAIF01001393.1 | 0     | 0     | 0.07  | 0      | 0.07   | 0      |
| GAIF01001394.1 | 0.95  | 1.2   | 0.17  | 5.13   | 13.47  | 3.65   |
| GAIF01001396.1 | 0.42  | 1.37  | 0.81  | 1.7    | 0.5    | 0.92   |
| GAIF01001397.1 | 0.45  | 0.38  | 0.38  | 0      | 0      | 0.08   |
| GAIF01001398.1 | 1.61  | 0.44  | 1.15  | 0.35   | 0.37   | 0.24   |
| GAIF01001399.1 | 11.98 | 6.99  | 3.66  | 17.3   | 28.85  | 2      |
| GAIF01001400.1 | 21.83 | 13.96 | 21.11 | 55.4   | 24.46  | 25.44  |
| GAIF01001403.1 | 3.29  | 5.1   | 2.96  | 13.57  | 6.03   | 0.77   |
| GAIF01001404.1 | 0     | 0.26  | 0.18  | 0      | 0.05   | 0.79   |
| GAIF01001405.1 | 4.73  | 0     | 0     | 5.19   | 26.92  | 6.26   |
| GAIF01001406.1 | 0.44  | 0.46  | 0.47  | 0.25   | 0.15   | 0.31   |
| GAIF01001407.1 | 17.32 | 27    | 31.06 | 10.72  | 6.25   | 6.58   |
| GAIF01001409.1 | 1.09  | 0     | 0     | 0.69   | 1.81   | 0      |
| GAIF01001412.1 | 0.27  | 0.24  | 0     | 0      | 0.21   | 0      |
| GAIF01001414.1 | 0.2   | 0     | 0     | 0.23   | 0.24   | 0.88   |
| GAIF01001415.1 | 26.17 | 10.45 | 8.99  | 44.52  | 58.42  | 26.35  |
| GAIF01001416.1 | 8.3   | 6.69  | 3.82  | 16.7   | 25.33  | 1.99   |
| GAIF01001417.1 | 0.09  | 0.1   | 0     | 1.46   | 5.99   | 0.1    |
| GAIF01001420.1 | 90.39 | 23.66 | 2.05  | 149.42 | 285.02 | 9.39   |
| GAIF01001421.1 | 4.3   | 1.53  | 0.34  | 16.52  | 40.17  | 4.31   |
| GAIF01001422.1 | 0     | 0     | 0.14  | 0      | 0      | 0      |
| GAIF01001425.1 | 0     | 0     | 0     | 0      | 0.34   | 0.04   |
| GAIF01001427.1 | 3.6   | 2.08  | 3.83  | 6.92   | 4.19   | 3.1    |
| GAIF01001428.1 | 2.76  | 2.81  | 0.4   | 17.78  | 50.74  | 0.2    |
| GAIF01001429.1 | 0     | 0     | 0     | 0.02   | 0      | 0      |
| GAIF01001430.1 | 0     | 0     | 0     | 0.13   | 0      | 0      |
| GAIF01001431.1 | 0.48  | 0     | 0.09  | 0.09   | 0.19   | 0      |
| GAIF01001432.1 | 87.43 | 38.03 | 76.84 | 239.05 | 189.2  | 211.97 |
| GAIF01001433.1 | 52.4  | 38.86 | 31.21 | 63.52  | 24.49  | 29.57  |
| GAIF01001434.1 | 2.43  | 3.33  | 1.17  | 20.12  | 38.63  | 1.08   |
| GAIF01001436.1 | 4.7   | 1.27  | 0.39  | 22.1   | 67.35  | 3.81   |
| GAIF01001440.1 | 0     | 0     | 0     | 0.07   | 0.61   | 0      |
| GAIF01001441.1 | 0     | 0     | 0     | 0      | 0.2    | 0      |
| GAIF01001443.1 | 0     | 0     | 0     | 0.11   | 0      | 0      |
| GAIF01001444.1 | 4.46  | 5.08  | 1.6   | 0.61   | 0      | 0.08   |
| GAIF01001445.1 | 1.32  | 0     | 0     | 2.75   | 16.04  | 0.51   |
| GAIF01001446.1 | 0     | 0     | 0.32  | 1.52   | 0.73   | 0.17   |
| GAIF01001447.1 | 5.47  | 7     | 6.69  | 3.34   | 1.58   | 2.23   |
| GAIF01001448.1 | 0     | 0.04  | 0     | 0.18   | 1.6    | 0.08   |
| GAIF01001449.1 | 42.77 | 38.02 | 47.33 | 48.59  | 52.26  | 56.74  |
| GAIF01001450.1 | 2.15  | 0.13  | 0.14  | 0      | 0      | 0      |

|                |        |        |        |        |        |         |
|----------------|--------|--------|--------|--------|--------|---------|
| GAIF01001451.1 | 0.7    | 0.05   | 0.41   | 3.3    | 1.74   | 1.59    |
| GAIF01001452.1 | 32.57  | 12.57  | 11.62  | 77.91  | 83.8   | 11.09   |
| GAIF01001453.1 | 0      | 0      | 0      | 0      | 0.25   | 0       |
| GAIF01001454.1 | 0      | 0      | 0      | 0      | 0.86   | 0       |
| GAIF01001455.1 | 7.55   | 6.61   | 3.46   | 9.06   | 8.2    | 1.3     |
| GAIF01001456.1 | 685.63 | 334.04 | 524.92 | 156.87 | 206.96 | 213.37  |
| GAIF01001457.1 | 11.63  | 13.77  | 10.81  | 11.07  | 4.39   | 3.75    |
| GAIF01001459.1 | 0      | 0      | 1.11   | 0      | 0      | 0       |
| GAIF01001460.1 | 0.27   | 0.07   | 0.37   | 1.23   | 3.35   | 0.45    |
| GAIF01001462.1 | 0      | 0      | 0.11   | 0      | 0      | 0       |
| GAIF01001466.1 | 0      | 0      | 0      | 0.06   | 0.63   | 0       |
| GAIF01001467.1 | 6.98   | 8.55   | 5.58   | 30.81  | 34.85  | 1.03    |
| GAIF01001469.1 | 0      | 0      | 0      | 0      | 0.21   | 0       |
| GAIF01001470.1 | 0.1    | 0      | 0      | 1.63   | 2.05   | 0       |
| GAIF01001471.1 | 4.69   | 4.97   | 6.85   | 3.31   | 2.94   | 3.6     |
| GAIF01001472.1 | 0.05   | 0.08   | 0.1    | 0.17   | 0.06   | 0       |
| GAIF01001473.1 | 0.18   | 0.2    | 0      | 2.34   | 10.57  | 0       |
| GAIF01001476.1 | 0      | 0      | 0      | 0      | 0.15   | 0       |
| GAIF01001477.1 | 0.31   | 0.11   | 0      | 0.61   | 5.42   | 0       |
| GAIF01001478.1 | 9.64   | 0.63   | 0      | 8.57   | 17.58  | 0       |
| GAIF01001479.1 | 16.18  | 21.56  | 13.08  | 56.25  | 35.83  | 5.18    |
| GAIF01001480.1 | 8.73   | 5.89   | 2.89   | 26.81  | 38.66  | 2.87    |
| GAIF01001482.1 | 0      | 0.05   | 0.21   | 0      | 0      | 0.15    |
| GAIF01001487.1 | 0.34   | 0      | 0      | 0.33   | 0.27   | 0.99    |
| GAIF01001488.1 | 44.5   | 16.23  | 12.28  | 33.62  | 56.22  | 37.08   |
| GAIF01001489.1 | 234.99 | 210.98 | 142.22 | 380.8  | 208.01 | 123.15  |
| GAIF01001490.1 | 108.3  | 60.31  | 36.92  | 112.01 | 248.93 | 82.16   |
| GAIF01001491.1 | 0      | 0.52   | 0.7    | 0      | 0      | 0       |
| GAIF01001492.1 | 0.36   | 0.17   | 0      | 0.56   | 0      | 0.19    |
| GAIF01001496.1 | 0      | 0.14   | 0      | 0      | 0      | 0       |
| GAIF01001498.1 | 0      | 0      | 0      | 0.03   | 0.01   | 0       |
| GAIF01001499.1 | 130.43 | 131.47 | 120.82 | 224.13 | 315.52 | 1255.95 |
| GAIF01001500.1 | 13.56  | 4.98   | 7.3    | 17.22  | 19.27  | 33.42   |
| GAIF01001501.1 | 0.14   | 0      | 0.08   | 0.16   | 0      | 0.22    |
| GAIF01001502.1 | 0.08   | 0      | 1.01   | 0      | 0.02   | 0.14    |
| GAIF01001503.1 | 0      | 0      | 0      | 0      | 0.06   | 0       |
| GAIF01001504.1 | 6.08   | 10.37  | 14.72  | 24.6   | 17.08  | 11.06   |
| GAIF01001505.1 | 1.31   | 1.57   | 0.9    | 4.58   | 8.34   | 0.47    |
| GAIF01001506.1 | 5.11   | 5.79   | 3.85   | 21.5   | 16.27  | 1.29    |
| GAIF01001507.1 | 0      | 0      | 0      | 0      | 0.11   | 0       |
| GAIF01001508.1 | 0.85   | 0.17   | 0.17   | 0.9    | 3.32   | 0.26    |
| GAIF01001512.1 | 0      | 0      | 0      | 0      | 0.22   | 0       |
| GAIF01001513.1 | 20.23  | 20.64  | 14.81  | 28.5   | 31.9   | 5.41    |
| GAIF01001514.1 | 0      | 0      | 0      | 0.32   | 0.17   | 0       |



|                |        |        |        |        |        |        |
|----------------|--------|--------|--------|--------|--------|--------|
| GAIF01001515.1 | 2.75   | 2.89   | 0.42   | 5.77   | 10.34  | 2.68   |
| GAIF01001516.1 | 0.87   | 0.54   | 0.27   | 4.12   | 6.07   | 0.21   |
| GAIF01001517.1 | 25.89  | 26.14  | 49.8   | 69.3   | 46.07  | 37.47  |
| GAIF01001519.1 | 0      | 0      | 0      | 0.1    | 1.85   | 0      |
| GAIF01001520.1 | 1.07   | 1.17   | 0.59   | 0.62   | 0.32   | 0.15   |
| GAIF01001521.1 | 0.2    | 0.03   | 0      | 0.02   | 1.47   | 0      |
| GAIF01001522.1 | 0      | 0.14   | 0.21   | 0      | 0.04   | 0.14   |
| GAIF01001523.1 | 0.18   | 0.23   | 0      | 0.21   | 0.29   | 0      |
| GAIF01001525.1 | 0      | 0      | 0      | 0.12   | 0.6    | 0.33   |
| GAIF01001528.1 | 14.76  | 15.73  | 10.33  | 34.64  | 23.89  | 3.57   |
| GAIF01001529.1 | 1.97   | 0.23   | 0.54   | 1.83   | 2.83   | 0.34   |
| GAIF01001533.1 | 0.04   | 0      | 0.29   | 2.51   | 5.52   | 0.1    |
| GAIF01001534.1 | 0      | 0      | 0      | 1.6    | 0.57   | 0      |
| GAIF01001535.1 | 0.32   | 0.17   | 1.31   | 0.37   | 0.1    | 0.17   |
| GAIF01001536.1 | 16.58  | 9.35   | 5.9    | 3.07   | 3.53   | 1.3    |
| GAIF01001537.1 | 0      | 0      | 0      | 0.06   | 0.12   | 0      |
| GAIF01001538.1 | 0.54   | 0      | 0      | 0.32   | 0.33   | 0.6    |
| GAIF01001539.1 | 0.04   | 0      | 0.05   | 0.15   | 0.48   | 0.1    |
| GAIF01001540.1 | 7.35   | 12.9   | 9.15   | 17.32  | 12.59  | 1.72   |
| GAIF01001541.1 | 0.18   | 0.39   | 0.13   | 0.49   | 1.24   | 0.13   |
| GAIF01001542.1 | 0      | 0      | 0      | 0      | 0.05   | 0      |
| GAIF01001543.1 | 0.7    | 0.37   | 0.21   | 0.51   | 0.43   | 0.02   |
| GAIF01001544.1 | 43.68  | 39.62  | 86.36  | 14.86  | 12.69  | 69.44  |
| GAIF01001545.1 | 0.11   | 0      | 0.17   | 0.13   | 0      | 0.06   |
| GAIF01001546.1 | 0.06   | 0.03   | 0      | 0      | 0.08   | 0      |
| GAIF01001547.1 | 0      | 0      | 0      | 0      | 1.99   | 0.32   |
| GAIF01001548.1 | 0      | 0.16   | 0      | 2.3    | 18.49  | 0.07   |
| GAIF01001550.1 | 0      | 0      | 0      | 0      | 0.11   | 0      |
| GAIF01001551.1 | 2.79   | 3.93   | 0.9    | 4.57   | 7.9    | 0      |
| GAIF01001552.1 | 0      | 0      | 0.12   | 0.16   | 0      | 0      |
| GAIF01001553.1 | 4.66   | 5.63   | 2.21   | 0.6    | 0.15   | 0.14   |
| GAIF01001554.1 | 1.5    | 0      | 0      | 1.02   | 0      | 1.67   |
| GAIF01001556.1 | 0.38   | 0.26   | 0.57   | 0.53   | 0.56   | 0.13   |
| GAIF01001557.1 | 0.47   | 0.18   | 0.08   | 3.19   | 16.97  | 0.05   |
| GAIF01001558.1 | 0.18   | 0      | 0      | 0.39   | 3.55   | 0.19   |
| GAIF01001559.1 | 41.26  | 113.97 | 120.66 | 30.13  | 46.99  | 39.34  |
| GAIF01001560.1 | 0.24   | 0      | 0      | 0      | 0.14   | 0      |
| GAIF01001562.1 | 167.76 | 120.47 | 262.1  | 377.2  | 229.46 | 335.84 |
| GAIF01001563.1 | 0.11   | 0.22   | 0.13   | 0.03   | 0.35   | 0      |
| GAIF01001564.1 | 0.27   | 0.54   | 0.27   | 0.48   | 0.48   | 0      |
| GAIF01001565.1 | 59.36  | 90.68  | 60.86  | 135.91 | 177.42 | 17.33  |
| GAIF01001567.1 | 0.2    | 0      | 0      | 0      | 0      | 0      |
| GAIF01001569.1 | 0      | 0      | 0      | 0      | 0.11   | 0      |
| GAIF01001570.1 | 0      | 0      | 0.19   | 0      | 0      | 0      |

|                |        |        |        |        |        |        |
|----------------|--------|--------|--------|--------|--------|--------|
| GAIF01001572.1 | 0      | 0.41   | 0      | 0.47   | 1.47   | 0      |
| GAIF01001574.1 | 0      | 0      | 0      | 0      | 0      | 0.14   |
| GAIF01001575.1 | 47.56  | 63.95  | 44.7   | 83.4   | 44.03  | 9.74   |
| GAIF01001577.1 | 0.05   | 0      | 0      | 0.17   | 0.03   | 0      |
| GAIF01001579.1 | 0      | 0      | 0      | 0.29   | 0.9    | 0.07   |
| GAIF01001580.1 | 0.83   | 0      | 0      | 3.86   | 16.61  | 7.41   |
| GAIF01001581.1 | 0.1    | 0.1    | 0      | 0.43   | 1.42   | 0.16   |
| GAIF01001582.1 | 18.02  | 16.62  | 16.82  | 91.19  | 71.5   | 11.53  |
| GAIF01001583.1 | 0      | 0      | 0      | 0      | 0.28   | 0.03   |
| GAIF01001584.1 | 0.12   | 0      | 0      | 0      | 0      | 0      |
| GAIF01001585.1 | 0      | 0.08   | 0      | 0.58   | 0      | 0      |
| GAIF01001586.1 | 0      | 0      | 0      | 0      | 0.23   | 0      |
| GAIF01001587.1 | 166.22 | 59.49  | 30.25  | 10.31  | 10.46  | 0      |
| GAIF01001588.1 | 0.02   | 0      | 0      | 0      | 1.61   | 0.53   |
| GAIF01001590.1 | 0      | 0      | 0      | 0      | 0.21   | 0      |
| GAIF01001591.1 | 0.2    | 0      | 0.07   | 0.15   | 0.15   | 0      |
| GAIF01001593.1 | 0.34   | 0.18   | 0      | 0      | 0.4    | 0      |
| GAIF01001594.1 | 0.09   | 0      | 0.2    | 1.56   | 7.34   | 0.4    |
| GAIF01001595.1 | 0      | 0.18   | 0      | 0.09   | 0.97   | 0.09   |
| GAIF01001597.1 | 0.72   | 0.43   | 0      | 2.78   | 7.82   | 0.35   |
| GAIF01001598.1 | 0      | 0.09   | 0.26   | 0.09   | 0.19   | 0.09   |
| GAIF01001599.1 | 7.68   | 9.71   | 4.38   | 29.23  | 29.57  | 1.87   |
| GAIF01001600.1 | 0      | 0      | 0      | 0      | 3.19   | 0      |
| GAIF01001601.1 | 0      | 0      | 0.02   | 0      | 0.05   | 0.02   |
| GAIF01001602.1 | 7.95   | 8.01   | 18.23  | 4.61   | 2.81   | 10.05  |
| GAIF01001603.1 | 11.83  | 12.79  | 3.49   | 27.54  | 39.95  | 3.01   |
| GAIF01001604.1 | 218.28 | 175.98 | 156.46 | 522.44 | 454    | 104.8  |
| GAIF01001605.1 | 0      | 0.06   | 0      | 0      | 0      | 0      |
| GAIF01001608.1 | 0      | 0      | 0      | 10.15  | 0      | 0      |
| GAIF01001609.1 | 7.64   | 4.99   | 1.76   | 44.75  | 28.53  | 1.57   |
| GAIF01001611.1 | 3.72   | 2.23   | 3.55   | 1.8    | 0.13   | 1.18   |
| GAIF01001612.1 | 10.52  | 0.5    | 0.45   | 14.5   | 9.94   | 2.86   |
| GAIF01001614.1 | 0.73   | 0.34   | 0.57   | 2.61   | 5.78   | 0.75   |
| GAIF01001615.1 | 0      | 0.17   | 0      | 0      | 0      | 0      |
| GAIF01001617.1 | 0.09   | 0.06   | 0      | 0.34   | 0.15   | 0      |
| GAIF01001618.1 | 0.02   | 0      | 0      | 0      | 0.02   | 0      |
| GAIF01001619.1 | 12.83  | 3.18   | 5.8    | 17.03  | 9.93   | 2.33   |
| GAIF01001621.1 | 0      | 1.53   | 1.79   | 0      | 0      | 0      |
| GAIF01001622.1 | 181.9  | 120.2  | 51.3   | 211.96 | 251.78 | 127.26 |
| GAIF01001623.1 | 0      | 0.05   | 0      | 0      | 0      | 0      |
| GAIF01001625.1 | 0      | 0.29   | 0      | 0.38   | 0.33   | 0      |
| GAIF01001626.1 | 0      | 0      | 0      | 0      | 0      | 0.08   |
| GAIF01001627.1 | 99.98  | 96.23  | 32.86  | 275.45 | 330.21 | 9.94   |
| GAIF01001628.1 | 425.76 | 292.48 | 443.17 | 517.93 | 223.51 | 658.37 |

|                |        |        |        |        |        |        |
|----------------|--------|--------|--------|--------|--------|--------|
| GAIF01001630.1 | 16.26  | 19.62  | 16.79  | 34.62  | 27.08  | 0.87   |
| GAIF01001631.1 | 6.47   | 4.94   | 4.1    | 2.38   | 1.35   | 1.72   |
| GAIF01001632.1 | 0.99   | 2.6    | 3.11   | 11.58  | 5.65   | 1.02   |
| GAIF01001633.1 | 2.73   | 2.52   | 1.25   | 5.91   | 7.57   | 1.06   |
| GAIF01001634.1 | 8.32   | 12.01  | 12.26  | 7.45   | 6      | 2.49   |
| GAIF01001635.1 | 0.13   | 0.07   | 0      | 0      | 0      | 0      |
| GAIF01001636.1 | 805.75 | 530.27 | 337.16 | 557.12 | 424.09 | 124.21 |
| GAIF01001637.1 | 0      | 0      | 0.66   | 0      | 0      | 0      |
| GAIF01001638.1 | 0      | 0      | 0.5    | 0      | 0.55   | 0.17   |
| GAIF01001639.1 | 8.48   | 16.82  | 6.79   | 21.31  | 13.44  | 3.3    |
| GAIF01001640.1 | 0.83   | 0.42   | 0.63   | 1.71   | 0.78   | 0.14   |
| GAIF01001641.1 | 31.29  | 13.62  | 16.67  | 10.35  | 0      | 5.49   |
| GAIF01001642.1 | 14.42  | 19.77  | 7.63   | 53.21  | 68.55  | 3.6    |
| GAIF01001643.1 | 0      | 0.09   | 0      | 0.37   | 0.39   | 0      |
| GAIF01001644.1 | 0.12   | 0.03   | 0      | 0      | 0.01   | 0      |
| GAIF01001645.1 | 0.15   | 0.18   | 0      | 0      | 0.1    | 0      |
| GAIF01001646.1 | 4.48   | 5.43   | 10.4   | 6.2    | 4.56   | 6.26   |
| GAIF01001648.1 | 10.91  | 6.4    | 7.11   | 21.45  | 28.79  | 24.65  |
| GAIF01001649.1 | 16.21  | 15.48  | 2.55   | 41.68  | 68.35  | 5.12   |
| GAIF01001650.1 | 13.92  | 20.98  | 15.28  | 36.42  | 21.59  | 7      |
| GAIF01001653.1 | 10.7   | 8.98   | 1.59   | 17.48  | 29.25  | 24.82  |
| GAIF01001654.1 | 0.03   | 0      | 0      | 0      | 0      | 0      |
| GAIF01001655.1 | 86.11  | 75.65  | 54.6   | 204.79 | 97.35  | 46.79  |
| GAIF01001656.1 | 0      | 0      | 0      | 0.09   | 0.09   | 0      |
| GAIF01001658.1 | 2.71   | 2.05   | 0.15   | 3.87   | 7.54   | 2.49   |
| GAIF01001659.1 | 0.44   | 0.08   | 0.03   | 0.1    | 0.07   | 0      |
| GAIF01001661.1 | 0      | 0      | 0      | 0.05   | 0      | 0      |
| GAIF01001662.1 | 19.06  | 8.4    | 31.35  | 53.8   | 27.17  | 90.61  |
| GAIF01001663.1 | 1.86   | 0      | 0.06   | 0.86   | 0.06   | 0      |
| GAIF01001664.1 | 0.26   | 0      | 0      | 0.75   | 6.22   | 0.43   |
| GAIF01001666.1 | 12.52  | 15.48  | 20.82  | 10.47  | 10.82  | 8.42   |
| GAIF01001667.1 | 0      | 0.65   | 0      | 0      | 0      | 0      |
| GAIF01001668.1 | 0.31   | 0      | 0      | 0.12   | 1.66   | 0      |
| GAIF01001669.1 | 25.55  | 7.8    | 9.22   | 30.46  | 14.94  | 51.1   |
| GAIF01001670.1 | 8.1    | 10.97  | 7.7    | 32.73  | 30.31  | 4.26   |
| GAIF01001672.1 | 0.31   | 0      | 0      | 1.11   | 4.8    | 0.09   |
| GAIF01001674.1 | 0.52   | 0.31   | 0.52   | 0.57   | 1.22   | 0.62   |
| GAIF01001676.1 | 6.02   | 8.06   | 4.83   | 0.26   | 0.2    | 0      |
| GAIF01001678.1 | 0.12   | 0      | 0      | 0.21   | 1.84   | 0      |
| GAIF01001680.1 | 0.04   | 0      | 0      | 0      | 0.07   | 0      |
| GAIF01001681.1 | 0.18   | 0      | 0      | 1.73   | 4.12   | 0.1    |
| GAIF01001682.1 | 0.55   | 1.6    | 0      | 0.88   | 1.97   | 0      |
| GAIF01001685.1 | 8.05   | 10.04  | 10.21  | 8.31   | 8.67   | 15.08  |
| GAIF01001686.1 | 20.52  | 16.78  | 16.92  | 75.74  | 90.32  | 10.05  |

|                |        |        |        |        |        |        |
|----------------|--------|--------|--------|--------|--------|--------|
| GAIF01001687.1 | 0      | 0.1    | 0.05   | 0.16   | 0.56   | 0      |
| GAIF01001688.1 | 0      | 0.11   | 0.11   | 0.12   | 0      | 0      |
| GAIF01001689.1 | 0.06   | 0.07   | 0      | 0.07   | 0.53   | 0      |
| GAIF01001690.1 | 0      | 0      | 0      | 1.25   | 0.22   | 0.2    |
| GAIF01001691.1 | 0.25   | 0      | 0      | 0.58   | 0.91   | 0.14   |
| GAIF01001692.1 | 0      | 0      | 0      | 0      | 0.07   | 0      |
| GAIF01001693.1 | 0.48   | 0.45   | 0.18   | 0.93   | 0.69   | 0      |
| GAIF01001694.1 | 0      | 0      | 0      | 0      | 0.23   | 0      |
| GAIF01001695.1 | 0      | 0      | 0      | 0.5    | 1.56   | 0.32   |
| GAIF01001696.1 | 1.6    | 1.2    | 0.86   | 6.73   | 17.19  | 0.56   |
| GAIF01001697.1 | 0.71   | 1.54   | 0.2    | 2.68   | 2.81   | 0.03   |
| GAIF01001699.1 | 1.5    | 2.18   | 2      | 13.72  | 12.3   | 0.75   |
| GAIF01001700.1 | 0      | 0      | 0.03   | 0.09   | 0.21   | 0      |
| GAIF01001701.1 | 9.52   | 13.28  | 7.36   | 33     | 24.3   | 2.36   |
| GAIF01001702.1 | 8.45   | 4.23   | 7.05   | 22.71  | 32.28  | 16.48  |
| GAIF01001703.1 | 0      | 0      | 1.21   | 0      | 0      | 0.35   |
| GAIF01001704.1 | 0      | 0.1    | 0      | 0.53   | 3.24   | 0.3    |
| GAIF01001705.1 | 1.26   | 0.86   | 0      | 0.76   | 0      | 0      |
| GAIF01001706.1 | 0.17   | 0      | 0      | 2.18   | 11.1   | 0.28   |
| GAIF01001707.1 | 0      | 0      | 0      | 0.18   | 0.19   | 0      |
| GAIF01001709.1 | 0      | 0.3    | 0.12   | 0      | 0.07   | 0      |
| GAIF01001710.1 | 0      | 0      | 0      | 0      | 0.11   | 0      |
| GAIF01001711.1 | 0      | 0.16   | 0      | 0.19   | 0.14   | 0      |
| GAIF01001712.1 | 61.34  | 43.31  | 90.28  | 162.42 | 162.24 | 273.27 |
| GAIF01001713.1 | 1.78   | 0.93   | 0.07   | 2.44   | 3.24   | 0      |
| GAIF01001714.1 | 0.09   | 0      | 0      | 0.11   | 0.79   | 0.1    |
| GAIF01001715.1 | 0      | 0      | 0      | 0.35   | 0.32   | 0      |
| GAIF01001717.1 | 0.07   | 0.02   | 0      | 0.04   | 0.01   | 0.01   |
| GAIF01001718.1 | 6.94   | 12.03  | 5.59   | 42.08  | 21.17  | 4.98   |
| GAIF01001721.1 | 1.06   | 1.46   | 3.15   | 2.39   | 1.51   | 0      |
| GAIF01001723.1 | 0      | 0.18   | 0      | 0.32   | 0.26   | 0      |
| GAIF01001724.1 | 1.54   | 3.3    | 2.32   | 3.58   | 7.61   | 2.87   |
| GAIF01001725.1 | 0      | 0.04   | 0.14   | 0      | 0      | 0.98   |
| GAIF01001728.1 | 0      | 0      | 0      | 0.17   | 0      | 0      |
| GAIF01001729.1 | 0      | 0      | 0      | 0      | 2.35   | 1.19   |
| GAIF01001733.1 | 1.79   | 0.97   | 0.39   | 4.77   | 8.6    | 3.74   |
| GAIF01001734.1 | 0      | 0      | 0      | 0.15   | 0.24   | 0      |
| GAIF01001738.1 | 5.43   | 0.01   | 0.02   | 0      | 1.46   | 0.01   |
| GAIF01001739.1 | 0      | 0.07   | 0      | 0.07   | 0.31   | 0      |
| GAIF01001741.1 | 144.68 | 183.26 | 557.76 | 186.47 | 120.12 | 303.06 |
| GAIF01001744.1 | 0      | 2.5    | 0      | 0.77   | 1.78   | 0.69   |
| GAIF01001746.1 | 0      | 0      | 0      | 0.12   | 0      | 0.06   |
| GAIF01001747.1 | 12.79  | 5.02   | 6.42   | 27.67  | 34.04  | 4.87   |
| GAIF01001748.1 | 1.38   | 0.82   | 0.73   | 2.6    | 17.5   | 0      |

|                |          |          |          |         |         |         |
|----------------|----------|----------|----------|---------|---------|---------|
| GAIF01001750.1 | 0.14     | 0        | 0        | 0       | 0       | 0       |
| GAIF01001752.1 | 0.7      | 0.66     | 0.82     | 0.16    | 0.06    | 0       |
| GAIF01001753.1 | 2.18     | 1.67     | 0.82     | 0.99    | 0.25    | 0       |
| GAIF01001754.1 | 2.73     | 1.78     | 0.15     | 6.65    | 10.17   | 0.45    |
| GAIF01001755.1 | 8        | 15.14    | 16.21    | 22.74   | 18.62   | 6.48    |
| GAIF01001756.1 | 3.62     | 3.87     | 2.2      | 12.55   | 14.62   | 1.96    |
| GAIF01001758.1 | 0.25     | 0        | 0        | 1.16    | 9.59    | 0.27    |
| GAIF01001759.1 | 0        | 0.16     | 0.41     | 0.09    | 0       | 0.16    |
| GAIF01001760.1 | 54.17    | 98.87    | 124.38   | 19.06   | 22.98   | 32.49   |
| GAIF01001761.1 | 5.29     | 0.65     | 0.13     | 14.94   | 29.01   | 0.53    |
| GAIF01001762.1 | 0        | 0.2      | 0        | 0.1     | 0.43    | 0       |
| GAIF01001763.1 | 27.8     | 27.55    | 16.8     | 50.9    | 51.27   | 12.64   |
| GAIF01001764.1 | 0        | 0        | 0        | 0.14    | 0       | 0       |
| GAIF01001765.1 | 72.79    | 39.69    | 26.85    | 257.24  | 251.41  | 85.7    |
| GAIF01001766.1 | 86.66    | 61.03    | 47.73    | 171.89  | 115.86  | 28.55   |
| GAIF01001767.1 | 0        | 0        | 0        | 0       | 0.34    | 0       |
| GAIF01001770.1 | 0.08     | 0.18     | 0.22     | 0.63    | 0.5     | 0.08    |
| GAIF01001772.1 | 0.1      | 0        | 0        | 0.12    | 0       | 0       |
| GAIF01001773.1 | 0        | 0        | 0        | 0       | 0.15    | 0       |
| GAIF01001774.1 | 0.23     | 0        | 0        | 0.21    | 0       | 0       |
| GAIF01001776.1 | 70.95    | 46.39    | 105.42   | 41.06   | 14      | 64.73   |
| GAIF01001779.1 | 1.86     | 0        | 0        | 0       | 0       | 0       |
| GAIF01001780.1 | 29.14    | 36.89    | 51.18    | 13.53   | 10.51   | 80.28   |
| GAIF01001781.1 | 6.45     | 6.83     | 9.95     | 26.15   | 32.89   | 6.93    |
| GAIF01001782.1 | 0        | 0        | 0        | 0.57    | 2.13    | 0       |
| GAIF01001783.1 | 1.17     | 0.51     | 0.41     | 0.87    | 0.73    | 0       |
| GAIF01001784.1 | 1.99     | 0        | 7.49     | 0.82    | 1.71    | 4.19    |
| GAIF01001785.1 | 0        | 0        | 0        | 0       | 0.08    | 0       |
| GAIF01001787.1 | 0.09     | 0.05     | 0.05     | 0.25    | 0.21    | 0.05    |
| GAIF01001788.1 | 3.08     | 0        | 0.57     | 1.26    | 2.33    | 10.24   |
| GAIF01001789.1 | 26.75    | 30.53    | 19.49    | 13.37   | 9.53    | 13.88   |
| GAIF01001790.1 | 54.18    | 63.14    | 66.63    | 207.35  | 98.36   | 53.14   |
| GAIF01001791.1 | 0        | 0        | 0        | 0       | 3.82    | 0       |
| GAIF01001792.1 | 24.84    | 22.54    | 20.36    | 38.35   | 31.85   | 9.06    |
| GAIF01001793.1 | 2.32     | 0.18     | 0        | 5.2     | 22.54   | 4.57    |
| GAIF01001794.1 | 841.99   | 5342.08  | 4582.37  | 40.22   | 126.63  | 218.44  |
| GAIF01001796.1 | 7.54     | 16.95    | 10.1     | 30.1    | 14.6    | 3.24    |
| GAIF01001797.1 | 15816.06 | 12068.87 | 12032.04 | 8659.34 | 2807.82 | 1858.21 |
| GAIF01001799.1 | 12.41    | 10.57    | 13.99    | 17.91   | 15.57   | 5.27    |
| GAIF01001801.1 | 4.63     | 0.28     | 0        | 1.5     | 4.53    | 2.15    |
| GAIF01001802.1 | 0.02     | 0        | 0        | 0.03    | 0       | 0       |
| GAIF01001804.1 | 0.07     | 0.12     | 0.23     | 0       | 0.92    | 0       |
| GAIF01001805.1 | 1.29     | 0        | 0.12     | 0.12    | 0       | 0.35    |
| GAIF01001806.1 | 0        | 0.2      | 0.15     | 0.16    | 0       | 0.26    |

|                |       |        |        |        |        |       |
|----------------|-------|--------|--------|--------|--------|-------|
| GAIF01001807.1 | 0     | 0.59   | 0.9    | 0      | 1.57   | 0.9   |
| GAIF01001808.1 | 0     | 0      | 0      | 0      | 0.19   | 0.28  |
| GAIF01001810.1 | 2.47  | 2.41   | 1.23   | 9.09   | 8.09   | 0.61  |
| GAIF01001811.1 | 6.66  | 2.02   | 0.82   | 9.57   | 14.16  | 3.72  |
| GAIF01001812.1 | 85.86 | 110.13 | 100.71 | 133.15 | 119.16 | 49.42 |
| GAIF01001813.1 | 0.49  | 0.45   | 0      | 0.08   | 0      | 0     |
| GAIF01001815.1 | 0.19  | 0.3    | 0.21   | 0.98   | 5.39   | 0.21  |
| GAIF01001816.1 | 4.17  | 4.93   | 2.66   | 8.26   | 5.53   | 0.37  |
| GAIF01001817.1 | 0.23  | 0.34   | 0.09   | 1.81   | 10.33  | 0.27  |
| GAIF01001818.1 | 0     | 0      | 0      | 0      | 0.24   | 0     |
| GAIF01001819.1 | 0     | 0.08   | 0      | 0.17   | 0      | 0.16  |
| GAIF01001820.1 | 93.16 | 149.98 | 68.02  | 176.74 | 126.93 | 15.81 |
| GAIF01001822.1 | 0.05  | 0      | 0.06   | 0      | 2.85   | 0.48  |
| GAIF01001823.1 | 0     | 0      | 0      | 0.05   | 0.32   | 0.07  |
| GAIF01001825.1 | 4.44  | 5.9    | 1.52   | 5.36   | 0.43   | 0.16  |
| GAIF01001827.1 | 0.13  | 0      | 0      | 0.84   | 5.57   | 0.07  |
| GAIF01001828.1 | 3.15  | 11.44  | 2.92   | 12.35  | 9.23   | 0.35  |
| GAIF01001829.1 | 0.05  | 0      | 0      | 0      | 0.29   | 0     |
| GAIF01001830.1 | 12.99 | 5.28   | 3.08   | 25.16  | 38.12  | 9.77  |
| GAIF01001831.1 | 13.85 | 0.25   | 0.34   | 21.04  | 1.1    | 1.35  |
| GAIF01001832.1 | 0.11  | 0      | 0      | 0      | 0      | 0     |
| GAIF01001833.1 | 0.01  | 0      | 0      | 0.02   | 0.18   | 0     |
| GAIF01001838.1 | 3.6   | 1.06   | 3.67   | 0.63   | 0.49   | 1.79  |
| GAIF01001839.1 | 0.46  | 0.17   | 0      | 0.38   | 1.43   | 0.17  |
| GAIF01001840.1 | 14.49 | 4.84   | 12.66  | 6.19   | 9.42   | 3.52  |
| GAIF01001841.1 | 0     | 0      | 0      | 0      | 0.36   | 0     |
| GAIF01001844.1 | 0     | 0      | 0.27   | 0      | 1.06   | 0.17  |
| GAIF01001845.1 | 3.01  | 3.27   | 4.08   | 9.44   | 3.62   | 1.17  |
| GAIF01001846.1 | 0.21  | 0.17   | 0.58   | 0.67   | 0.06   | 0.06  |
| GAIF01001848.1 | 0     | 0.93   | 0      | 6.93   | 14.36  | 1.41  |
| GAIF01001850.1 | 8.46  | 6.21   | 7.44   | 1.41   | 0.64   | 0.42  |
| GAIF01001851.1 | 0.06  | 0      | 0      | 0.42   | 0.14   | 0     |
| GAIF01001852.1 | 1.36  | 0      | 0.25   | 0.44   | 0.09   | 0     |
| GAIF01001857.1 | 0.12  | 0      | 0      | 0      | 0      | 0     |
| GAIF01001858.1 | 0     | 0      | 0      | 0.07   | 0      | 0     |
| GAIF01001859.1 | 9.86  | 10.61  | 4.21   | 48.59  | 58.92  | 1.21  |
| GAIF01001861.1 | 72.15 | 37.31  | 7.84   | 100.05 | 67.24  | 23.46 |
| GAIF01001863.1 | 0     | 0      | 0      | 0.14   | 0      | 0     |
| GAIF01001865.1 | 43.83 | 32.22  | 45.31  | 36.07  | 35.43  | 20.21 |
| GAIF01001866.1 | 0.08  | 0.25   | 0.08   | 0      | 0.09   | 0     |
| GAIF01001867.1 | 11    | 12.82  | 10.33  | 28.69  | 34.5   | 4.25  |
| GAIF01001868.1 | 0     | 0.09   | 0      | 0.71   | 0.06   | 0.13  |
| GAIF01001869.1 | 1.67  | 0      | 0.92   | 1.74   | 0.8    | 0.55  |
| GAIF01001870.1 | 2.4   | 0.51   | 3.99   | 1.35   | 0.19   | 2.73  |

|                |        |        |        |        |        |         |
|----------------|--------|--------|--------|--------|--------|---------|
| GAIF01001872.1 | 0      | 0      | 0      | 4.41   | 0      | 0.2     |
| GAIF01001874.1 | 6.24   | 9.93   | 4.01   | 24.21  | 24.17  | 2.01    |
| GAIF01001875.1 | 0      | 0      | 0      | 0      | 0      | 0.16    |
| GAIF01001877.1 | 1.49   | 0.32   | 0.16   | 5.42   | 10.72  | 0.17    |
| GAIF01001878.1 | 18.4   | 27.51  | 16.76  | 35.71  | 27.13  | 3.64    |
| GAIF01001879.1 | 10.09  | 5.23   | 4.48   | 2.16   | 1.73   | 1.32    |
| GAIF01001880.1 | 3.03   | 0.9    | 0.36   | 14.92  | 74.87  | 8.67    |
| GAIF01001881.1 | 5.05   | 7.96   | 4.21   | 26.04  | 23.91  | 1.98    |
| GAIF01001883.1 | 40.37  | 33.28  | 48.33  | 87.04  | 70.09  | 67.82   |
| GAIF01001884.1 | 0.11   | 0.12   | 0      | 0      | 0.06   | 0       |
| GAIF01001885.1 | 10.59  | 7.66   | 17.67  | 22.64  | 13.5   | 15.1    |
| GAIF01001886.1 | 0.51   | 0.42   | 0.42   | 0.3    | 0      | 0       |
| GAIF01001887.1 | 0.8    | 0.87   | 0      | 3.83   | 11.09  | 0       |
| GAIF01001888.1 | 1.46   | 0.41   | 0.54   | 2.23   | 5.88   | 2.57    |
| GAIF01001889.1 | 207.51 | 92.04  | 70.15  | 199.07 | 175.03 | 76.56   |
| GAIF01001891.1 | 1.79   | 0.81   | 2.54   | 0.78   | 0.36   | 0.58    |
| GAIF01001892.1 | 2.8    | 0.09   | 0      | 1.43   | 2.28   | 1.18    |
| GAIF01001893.1 | 19.32  | 75.24  | 38.15  | 3.86   | 1.65   | 0       |
| GAIF01001894.1 | 0      | 0      | 0      | 0.01   | 0.27   | 0       |
| GAIF01001895.1 | 7.5    | 4.41   | 14.04  | 18.96  | 0.04   | 6.11    |
| GAIF01001898.1 | 0      | 0.03   | 0      | 0      | 0      | 0       |
| GAIF01001902.1 | 3.09   | 2.84   | 0.84   | 2.6    | 2.36   | 0.69    |
| GAIF01001903.1 | 0.18   | 0      | 0.05   | 0      | 0      | 0       |
| GAIF01001904.1 | 542.17 | 647.79 | 909.15 | 283.08 | 235.07 | 1176.44 |
| GAIF01001905.1 | 35.37  | 45.74  | 29.42  | 0.25   | 0.53   | 0       |
| GAIF01001908.1 | 0      | 0.06   | 0      | 0      | 0      | 0       |
| GAIF01001909.1 | 0      | 0      | 0.82   | 0.37   | 0.26   | 0       |
| GAIF01001910.1 | 0.21   | 0.22   | 0.47   | 1.36   | 0.77   | 0.23    |
| GAIF01001912.1 | 14.78  | 24.13  | 15.46  | 12.98  | 9.04   | 1.32    |
| GAIF01001914.1 | 1.72   | 0.43   | 0.15   | 6.43   | 24.8   | 0.74    |
| GAIF01001916.1 | 0.9    | 2.5    | 1.28   | 0.64   | 0.66   | 1.21    |
| GAIF01001917.1 | 0.93   | 0.12   | 2.95   | 0.08   | 0.01   | 1.93    |
| GAIF01001918.1 | 285.46 | 326    | 512.77 | 260.07 | 206.55 | 309.79  |
| GAIF01001919.1 | 0      | 0      | 0      | 0      | 0.84   | 0.15    |
| GAIF01001921.1 | 0.21   | 0      | 0      | 0      | 0.51   | 0       |
| GAIF01001922.1 | 1.97   | 2.04   | 0      | 10.57  | 38.51  | 5.9     |
| GAIF01001923.1 | 0.12   | 0      | 0      | 0.14   | 0.45   | 0       |
| GAIF01001925.1 | 0.1    | 0.11   | 0      | 0      | 0.5    | 0       |
| GAIF01001926.1 | 2.03   | 2.71   | 3.63   | 1.17   | 1.43   | 0.15    |
| GAIF01001928.1 | 0      | 0      | 0      | 0.47   | 4.45   | 0.45    |
| GAIF01001931.1 | 0      | 0      | 0      | 0.15   | 0      | 0.14    |
| GAIF01001932.1 | 0.07   | 0      | 0      | 0.15   | 0      | 0.22    |
| GAIF01001936.1 | 253.19 | 175.27 | 168.45 | 95.54  | 72.12  | 131.52  |
| GAIF01001937.1 | 401.22 | 804.99 | 300.12 | 310.39 | 561.4  | 210.85  |

|                |         |         |         |       |        |        |
|----------------|---------|---------|---------|-------|--------|--------|
| GAIF01001938.1 | 78.35   | 59.57   | 41.76   | 127.5 | 88.45  | 25.5   |
| GAIF01001942.1 | 25.26   | 24.29   | 29.01   | 38.8  | 25.87  | 19.62  |
| GAIF01001943.1 | 0.09    | 0.05    | 0.08    | 0.3   | 1.16   | 0.7    |
| GAIF01001945.1 | 0       | 0       | 0       | 0     | 0.35   | 0      |
| GAIF01001947.1 | 5.49    | 6.08    | 2.52    | 2.55  | 1.92   | 2.75   |
| GAIF01001948.1 | 9.75    | 2.19    | 0       | 22.63 | 56.82  | 6.3    |
| GAIF01001949.1 | 0.15    | 0       | 0.39    | 1.6   | 5.09   | 1.97   |
| GAIF01001950.1 | 0       | 0       | 0       | 0.08  | 0      | 0      |
| GAIF01001951.1 | 0       | 0       | 0       | 0.02  | 0.02   | 0      |
| GAIF01001953.1 | 0.03    | 0.03    | 0.06    | 0.37  | 0.45   | 0.06   |
| GAIF01001954.1 | 0       | 0       | 0       | 0.08  | 0.44   | 0      |
| GAIF01001956.1 | 2668.54 | 1452.12 | 2037.81 | 47.64 | 27.04  | 9.79   |
| GAIF01001958.1 | 0       | 0       | 0       | 0     | 0.19   | 0      |
| GAIF01001959.1 | 4.59    | 3.03    | 1.65    | 7.51  | 21.7   | 0.41   |
| GAIF01001960.1 | 16.84   | 3.4     | 1.01    | 22.92 | 128.21 | 296.55 |
| GAIF01001962.1 | 19.81   | 18.99   | 10.65   | 55.6  | 57.81  | 2.93   |
| GAIF01001963.1 | 0       | 0       | 0       | 0     | 0.23   | 0      |
| GAIF01001964.1 | 0.99    | 4.3     | 3.1     | 2.62  | 2.55   | 0.16   |
| GAIF01001965.1 | 0.35    | 0       | 0       | 0.41  | 0.85   | 0      |
| GAIF01001966.1 | 35.1    | 45.93   | 57.1    | 41.33 | 40.72  | 39.19  |
| GAIF01001968.1 | 1       | 0.14    | 0.18    | 0.1   | 0      | 0      |
| GAIF01001969.1 | 13.19   | 22.23   | 15.87   | 13.51 | 8.11   | 1.32   |
| GAIF01001970.1 | 10.59   | 18.13   | 6.39    | 5.93  | 7.24   | 0.41   |
| GAIF01001971.1 | 97.03   | 26.65   | 24.77   | 10.57 | 4.72   | 2.11   |
| GAIF01001973.1 | 0       | 0       | 0       | 0.09  | 0.55   | 0      |
| GAIF01001974.1 | 0       | 0.07    | 0.16    | 0.09  | 0.54   | 0.17   |
| GAIF01001975.1 | 0       | 0       | 0.32    | 0     | 0      | 0      |
| GAIF01001976.1 | 0       | 0       | 0       | 0     | 0.13   | 0      |
| GAIF01001980.1 | 0       | 0.1     | 0       | 0.59  | 2.68   | 0.32   |
| GAIF01001981.1 | 31.08   | 19.54   | 16.71   | 51.49 | 35.49  | 17.55  |
| GAIF01001983.1 | 2.7     | 3.26    | 1.5     | 7.31  | 8.11   | 0.31   |
| GAIF01001984.1 | 2.32    | 1.73    | 0.14    | 4.46  | 3.51   | 0.23   |
| GAIF01001985.1 | 0.18    | 0.2     | 0       | 0     | 0.44   | 0      |
| GAIF01001986.1 | 0       | 0       | 0       | 0     | 0.13   | 0      |
| GAIF01001987.1 | 1.12    | 1.46    | 0.74    | 1.82  | 1.75   | 0      |
| GAIF01001991.1 | 0.18    | 0.02    | 0.1     | 0.05  | 0      | 0.02   |
| GAIF01001992.1 | 2.89    | 0       | 2.77    | 0.8   | 0      | 0.14   |
| GAIF01001993.1 | 52.16   | 51.64   | 5.81    | 60.87 | 61.08  | 15.22  |
| GAIF01001994.1 | 4.12    | 2.55    | 4.75    | 2.92  | 4.53   | 21.9   |
| GAIF01001998.1 | 1.61    | 0       | 0       | 1.87  | 4.2    | 0      |
| GAIF01001999.1 | 20      | 31.32   | 41.66   | 30.28 | 29.47  | 15.75  |
| GAIF01002000.1 | 15.39   | 12.59   | 19.54   | 25    | 15.09  | 14.67  |
| GAIF01002001.1 | 0.03    | 0       | 0       | 0     | 0      | 0      |
| GAIF01002002.1 | 0       | 0       | 0       | 0     | 0      | 0.06   |



|                |         |        |         |        |       |        |
|----------------|---------|--------|---------|--------|-------|--------|
| GAIF01002003.1 | 0.53    | 0      | 0       | 0.2    | 0.32  | 0      |
| GAIF01002004.1 | 117.8   | 33.39  | 44.46   | 69.24  | 49.95 | 214.62 |
| GAIF01002005.1 | 0       | 0.09   | 0       | 0      | 0     | 0      |
| GAIF01002006.1 | 1.08    | 0.69   | 0       | 2.93   | 5.19  | 0      |
| GAIF01002007.1 | 0       | 0      | 0.64    | 1.27   | 0.51  | 0      |
| GAIF01002009.1 | 0       | 0      | 0       | 0.17   | 0     | 0      |
| GAIF01002010.1 | 4.08    | 11.96  | 6.04    | 7.35   | 8.82  | 0.64   |
| GAIF01002011.1 | 0       | 0      | 0       | 0      | 0     | 0.1    |
| GAIF01002012.1 | 0.31    | 0.33   | 0.07    | 0.21   | 0.59  | 0      |
| GAIF01002013.1 | 0.94    | 0      | 0       | 2.98   | 20.77 | 0.27   |
| GAIF01002014.1 | 4.9     | 2.2    | 2.8     | 5.98   | 0     | 0      |
| GAIF01002016.1 | 4.2     | 7.35   | 2.61    | 15.26  | 21.19 | 0.3    |
| GAIF01002019.1 | 4.84    | 5.01   | 3.54    | 17.66  | 10.26 | 1.27   |
| GAIF01002020.1 | 4.27    | 1.63   | 3.03    | 1.43   | 0.85  | 0.27   |
| GAIF01002021.1 | 0.31    | 0      | 0.17    | 1.07   | 1.29  | 0      |
| GAIF01002023.1 | 1664.73 | 1919.6 | 2497.86 | 273.97 | 169.7 | 196.45 |
| GAIF01002024.1 | 76.98   | 123.44 | 96.16   | 191.56 | 142   | 78.71  |
| GAIF01002025.1 | 19.92   | 28.75  | 25.35   | 11.66  | 12.84 | 3.18   |
| GAIF01002027.1 | 0.26    | 0.05   | 0       | 0      | 0     | 0      |
| GAIF01002029.1 | 0.33    | 0.72   | 0.36    | 2.87   | 4.95  | 1.27   |
| GAIF01002031.1 | 0.32    | 0.32   | 0.36    | 0.19   | 0.04  | 0      |
| GAIF01002032.1 | 0       | 0      | 0       | 1.1    | 5.39  | 0.9    |
| GAIF01002033.1 | 0       | 0.01   | 0       | 0      | 0     | 0      |
| GAIF01002034.1 | 12.23   | 8.95   | 7.85    | 2.92   | 0.65  | 1.2    |
| GAIF01002036.1 | 0.38    | 0.12   | 0       | 0.57   | 6.65  | 0.3    |
| GAIF01002038.1 | 0.06    | 0      | 0       | 0      | 0     | 0      |
| GAIF01002039.1 | 5.25    | 16.79  | 4.86    | 34.59  | 42.37 | 2.09   |
| GAIF01002042.1 | 9.72    | 5.79   | 11.62   | 7.69   | 9.96  | 17.83  |
| GAIF01002043.1 | 1.87    | 3.65   | 1.63    | 1.34   | 2.71  | 0.23   |
| GAIF01002044.1 | 0       | 0      | 0       | 0      | 1.24  | 0      |
| GAIF01002045.1 | 0.03    | 0.06   | 0       | 0      | 0     | 0.03   |
| GAIF01002046.1 | 0       | 0      | 0.05    | 0      | 0     | 0      |
| GAIF01002047.1 | 0.05    | 0.32   | 0       | 0      | 0     | 0      |
| GAIF01002048.1 | 0       | 0.15   | 0       | 0      | 0     | 0      |
| GAIF01002049.1 | 0.06    | 0.03   | 0.13    | 0.11   | 0.37  | 0.03   |
| GAIF01002050.1 | 0.11    | 0.24   | 0.06    | 0.04   | 0.04  | 0      |
| GAIF01002051.1 | 7.52    | 9.33   | 4.64    | 16.23  | 18.72 | 1.89   |
| GAIF01002052.1 | 0.42    | 0.36   | 0.26    | 0.82   | 0.85  | 1.24   |
| GAIF01002053.1 | 0       | 0      | 0       | 0      | 0.26  | 0      |
| GAIF01002054.1 | 2.51    | 3.26   | 0.53    | 13.3   | 24.33 | 0.92   |
| GAIF01002055.1 | 0.68    | 0.63   | 0       | 0      | 0     | 0      |
| GAIF01002057.1 | 18.62   | 35.36  | 14.73   | 49.87  | 48.8  | 4.08   |
| GAIF01002058.1 | 4.97    | 2.97   | 2.57    | 11.3   | 21.55 | 3.65   |
| GAIF01002059.1 | 5.85    | 4.28   | 3.51    | 11.36  | 7.04  | 1.17   |

|                |        |        |        |        |        |        |
|----------------|--------|--------|--------|--------|--------|--------|
| GAIF01002060.1 | 0      | 0      | 0.16   | 0      | 0      | 0      |
| GAIF01002061.1 | 36.61  | 7.92   | 8.89   | 22.61  | 43.73  | 171.99 |
| GAIF01002062.1 | 0      | 0      | 0      | 0.13   | 0.27   | 0.12   |
| GAIF01002063.1 | 333.43 | 575.24 | 389.49 | 313    | 301.97 | 69.05  |
| GAIF01002068.1 | 0.11   | 0.3    | 0.37   | 0.39   | 0.14   | 0      |
| GAIF01002069.1 | 0.32   | 0.2    | 0      | 0.11   | 0.05   | 0      |
| GAIF01002070.1 | 0      | 0      | 0      | 0.09   | 0      | 0      |
| GAIF01002072.1 | 0.04   | 0      | 0      | 0      | 0      | 0      |
| GAIF01002074.1 | 13.54  | 29.44  | 25.6   | 28.74  | 20.98  | 5.1    |
| GAIF01002075.1 | 44.61  | 48.83  | 58.38  | 125.67 | 135.93 | 39.35  |
| GAIF01002077.1 | 6.25   | 15.52  | 10.62  | 13.97  | 14.19  | 0.26   |
| GAIF01002078.1 | 0      | 0      | 0.06   | 0      | 0.06   | 0      |
| GAIF01002080.1 | 0      | 0      | 0      | 0      | 2.97   | 0      |
| GAIF01002081.1 | 0.29   | 0.87   | 0.44   | 0.13   | 6.29   | 0.06   |
| GAIF01002082.1 | 2.56   | 0.68   | 0.14   | 6.78   | 31.08  | 1.1    |
| GAIF01002084.1 | 0.11   | 0      | 0      | 0.09   | 0      | 0.21   |
| GAIF01002086.1 | 0.12   | 0.18   | 0      | 2.27   | 4.67   | 0.64   |
| GAIF01002087.1 | 261.31 | 202.76 | 221    | 249.33 | 152.8  | 72.47  |
| GAIF01002090.1 | 15.47  | 14.76  | 24.65  | 27.23  | 14.8   | 16.49  |
| GAIF01002091.1 | 7.14   | 11.85  | 9.22   | 33.02  | 16.73  | 10.36  |
| GAIF01002092.1 | 0.08   | 0.06   | 0.12   | 0.71   | 0.92   | 0      |
| GAIF01002093.1 | 7.6    | 4.52   | 1.17   | 4      | 2.29   | 0.52   |
| GAIF01002095.1 | 2.03   | 1.32   | 0.09   | 0.19   | 0.39   | 0.09   |
| GAIF01002096.1 | 13.82  | 12.13  | 7.99   | 66.85  | 35.73  | 5.21   |
| GAIF01002098.1 | 0.5    | 0.11   | 0.11   | 2.32   | 17.68  | 0.77   |
| GAIF01002100.1 | 4.28   | 0.07   | 0.15   | 13.71  | 45.94  | 1.43   |
| GAIF01002101.1 | 5.14   | 0.59   | 0.37   | 12.94  | 22.35  | 43.31  |
| GAIF01002102.1 | 2.17   | 1.32   | 1.02   | 6.28   | 13.43  | 1.53   |
| GAIF01002104.1 | 0      | 0      | 0      | 0      | 0.05   | 0      |
| GAIF01002105.1 | 0      | 0.45   | 0.98   | 0      | 0      | 1.29   |
| GAIF01002108.1 | 0.63   | 0.28   | 0.03   | 4.9    | 15.85  | 0.14   |
| GAIF01002109.1 | 0      | 0.26   | 0      | 0.14   | 0.58   | 0      |
| GAIF01002111.1 | 22.92  | 29     | 8.52   | 76.72  | 80.07  | 8.04   |
| GAIF01002112.1 | 0      | 0.1    | 0      | 0      | 0      | 0      |
| GAIF01002114.1 | 297.24 | 271.97 | 102.32 | 499.73 | 696.16 | 226.57 |
| GAIF01002115.1 | 0      | 0      | 0.2    | 0.59   | 0      | 0      |
| GAIF01002116.1 | 10.13  | 17.66  | 10     | 33.87  | 27.83  | 3.41   |
| GAIF01002118.1 | 0      | 0      | 0.03   | 0.07   | 0.49   | 0      |
| GAIF01002120.1 | 0      | 0      | 0      | 0      | 0.13   | 0      |
| GAIF01002121.1 | 1.95   | 1.09   | 0.64   | 1.72   | 11.39  | 1.53   |
| GAIF01002122.1 | 11.67  | 18.83  | 18.1   | 38.84  | 15.54  | 7.86   |
| GAIF01002123.1 | 13.16  | 3.87   | 4.94   | 12.54  | 4.2    | 2.81   |
| GAIF01002124.1 | 0      | 0      | 0      | 0.15   | 0.15   | 0      |
| GAIF01002125.1 | 0      | 0      | 0      | 0      | 0.16   | 0      |

|                |        |        |       |        |        |       |
|----------------|--------|--------|-------|--------|--------|-------|
| GAIF01002127.1 | 16.97  | 9.36   | 0     | 244.12 | 66.03  | 6.56  |
| GAIF01002128.1 | 13.01  | 0      | 0     | 6.65   | 3.98   | 1.69  |
| GAIF01002129.1 | 2.12   | 0.47   | 0.8   | 1.95   | 0      | 1.72  |
| GAIF01002130.1 | 0.48   | 0      | 0     | 0      | 0      | 0     |
| GAIF01002134.1 | 0.04   | 0.08   | 0.04  | 0.08   | 0.17   | 0.08  |
| GAIF01002135.1 | 76.76  | 49.42  | 36.4  | 40.22  | 23.82  | 13    |
| GAIF01002139.1 | 15.91  | 9.91   | 0.07  | 31.05  | 20.63  | 19.74 |
| GAIF01002140.1 | 0      | 0      | 0     | 0.33   | 2.22   | 0.16  |
| GAIF01002141.1 | 0.48   | 0.09   | 0     | 2.05   | 10.92  | 0.09  |
| GAIF01002145.1 | 0.4    | 0.07   | 0     | 6.01   | 33.85  | 1.4   |
| GAIF01002146.1 | 0      | 0.16   | 0.33  | 0      | 0.18   | 0     |
| GAIF01002148.1 | 0.47   | 0.65   | 1.58  | 3.01   | 5.28   | 0.69  |
| GAIF01002149.1 | 25.9   | 32.54  | 20.63 | 37.64  | 36.74  | 34.9  |
| GAIF01002150.1 | 1.17   | 1.75   | 0.32  | 3.56   | 11.5   | 0.4   |
| GAIF01002151.1 | 2.92   | 0.8    | 0     | 6.45   | 25.99  | 0.8   |
| GAIF01002153.1 | 0      | 1.23   | 0.83  | 0      | 0      | 0.21  |
| GAIF01002154.1 | 0      | 0      | 0.33  | 0      | 0      | 0     |
| GAIF01002155.1 | 10.59  | 14.2   | 16.18 | 23.41  | 13.9   | 5.2   |
| GAIF01002156.1 | 0.06   | 0      | 0     | 0      | 0      | 0     |
| GAIF01002157.1 | 1.04   | 0.19   | 0.95  | 0.66   | 0      | 0.33  |
| GAIF01002159.1 | 0      | 0      | 0     | 0      | 5.86   | 0     |
| GAIF01002160.1 | 0      | 0      | 0     | 0.04   | 0.05   | 0     |
| GAIF01002161.1 | 1.53   | 1.58   | 2.74  | 12.52  | 55.38  | 2.75  |
| GAIF01002162.1 | 0.37   | 0.2    | 0     | 3.67   | 17.69  | 0.41  |
| GAIF01002164.1 | 13.08  | 9.98   | 5.59  | 21.09  | 21.28  | 4.4   |
| GAIF01002165.1 | 16.17  | 12.05  | 19.54 | 42.3   | 23.29  | 47.35 |
| GAIF01002166.1 | 0.11   | 0      | 0.04  | 0.32   | 0.21   | 0.04  |
| GAIF01002167.1 | 63.11  | 48.81  | 60.7  | 74.98  | 54.5   | 27.4  |
| GAIF01002168.1 | 11.15  | 10.28  | 12.97 | 28.06  | 21.66  | 9.64  |
| GAIF01002169.1 | 2.43   | 0.79   | 0.11  | 4.91   | 8.88   | 0.1   |
| GAIF01002172.1 | 89     | 115.84 | 101   | 13.76  | 6.21   | 3.35  |
| GAIF01002174.1 | 0      | 0.12   | 0     | 0      | 0      | 0     |
| GAIF01002176.1 | 7.14   | 6.67   | 8.17  | 14.94  | 17.07  | 6.65  |
| GAIF01002177.1 | 3.58   | 3.01   | 1.49  | 6.65   | 5.02   | 0.77  |
| GAIF01002178.1 | 103.21 | 183.12 | 41    | 61.53  | 123.71 | 60.7  |
| GAIF01002179.1 | 19.77  | 22.69  | 20.89 | 49.95  | 46.31  | 5.97  |
| GAIF01002180.1 | 19.09  | 15.23  | 19.43 | 43.47  | 47.15  | 19.23 |
| GAIF01002181.1 | 7.82   | 10.67  | 6.73  | 6.59   | 8.72   | 2.47  |
| GAIF01002184.1 | 15.97  | 22.38  | 27.38 | 35.37  | 19.99  | 9.31  |
| GAIF01002185.1 | 0.25   | 0      | 0     | 0.29   | 0.31   | 0     |
| GAIF01002186.1 | 0.16   | 0.1    | 0     | 1.04   | 3.67   | 0.21  |
| GAIF01002187.1 | 56.86  | 56.43  | 31.16 | 13.82  | 5.73   | 0.87  |
| GAIF01002190.1 | 0.09   | 0.1    | 0     | 0      | 0.59   | 0     |
| GAIF01002191.1 | 0.5    | 0.48   | 0.1   | 6.07   | 20.56  | 0.14  |

|                |         |         |         |         |       |        |
|----------------|---------|---------|---------|---------|-------|--------|
| GAIF01002192.1 | 122.01  | 173.82  | 225.68  | 108.92  | 83.42 | 83.24  |
| GAIF01002193.1 | 9.37    | 6.01    | 7.17    | 25.28   | 27.87 | 7.3    |
| GAIF01002194.1 | 20.7    | 36.74   | 32.13   | 59.37   | 45.5  | 15.21  |
| GAIF01002195.1 | 2.09    | 1.14    | 0.38    | 10.25   | 46.06 | 1.54   |
| GAIF01002196.1 | 12.6    | 17.55   | 19.27   | 23.82   | 18.39 | 12.95  |
| GAIF01002197.1 | 0.46    | 0.05    | 0       | 0.26    | 2.47  | 3.07   |
| GAIF01002201.1 | 4.2     | 1.32    | 2.56    | 20.02   | 7.4   | 9.39   |
| GAIF01002202.1 | 3.64    | 4.52    | 1.91    | 37.09   | 31.14 | 2.62   |
| GAIF01002204.1 | 4.41    | 6.71    | 2.07    | 0.29    | 0.15  | 0      |
| GAIF01002205.1 | 0       | 0       | 0       | 0       | 0.11  | 0      |
| GAIF01002206.1 | 3.25    | 0.58    | 0.47    | 2.6     | 3.32  | 1.11   |
| GAIF01002207.1 | 0       | 0.28    | 0.86    | 0       | 0     | 0.48   |
| GAIF01002208.1 | 12.19   | 14.79   | 15.71   | 11.69   | 4     | 2.67   |
| GAIF01002210.1 | 32.97   | 12.54   | 32.45   | 24.91   | 20.4  | 10.91  |
| GAIF01002211.1 | 27.15   | 0.87    | 0.44    | 1.08    | 0.16  | 0      |
| GAIF01002213.1 | 3.93    | 3.18    | 3.15    | 11.82   | 17.87 | 4.94   |
| GAIF01002216.1 | 1.41    | 0.59    | 0.36    | 1.76    | 2.87  | 0.6    |
| GAIF01002218.1 | 0.14    | 0       | 0       | 0       | 0     | 0      |
| GAIF01002219.1 | 138.6   | 74.66   | 33.16   | 221.36  | 224.4 | 47.41  |
| GAIF01002220.1 | 0       | 0       | 0       | 0       | 0.02  | 0      |
| GAIF01002221.1 | 0       | 0.14    | 0       | 0       | 0     | 0      |
| GAIF01002222.1 | 0       | 0.05    | 0.05    | 0       | 0.1   | 0      |
| GAIF01002224.1 | 1516.88 | 1663.72 | 2424.51 | 1243.68 | 653.7 | 471.15 |
| GAIF01002226.1 | 3.64    | 22.78   | 9.36    | 1.72    | 1.3   | 0.53   |
| GAIF01002227.1 | 26.2    | 24.4    | 25.84   | 57.82   | 40    | 11.67  |
| GAIF01002229.1 | 0       | 0.03    | 0       | 0.15    | 0.19  | 0.07   |
| GAIF01002230.1 | 0.73    | 0.1     | 0.1     | 5.51    | 30.08 | 0.4    |
| GAIF01002231.1 | 0       | 0       | 0       | 0.09    | 1.39  | 0.17   |
| GAIF01002232.1 | 0       | 0       | 0       | 0.07    | 0     | 0      |
| GAIF01002233.1 | 0       | 0.06    | 0       | 0.12    | 0     | 0      |
| GAIF01002235.1 | 0       | 0       | 0.12    | 0.12    | 1.07  | 0.11   |
| GAIF01002237.1 | 0.35    | 0.09    | 0.24    | 0.15    | 0.21  | 0.02   |
| GAIF01002238.1 | 0       | 0.54    | 0.37    | 8.11    | 74.35 | 0.37   |
| GAIF01002239.1 | 1.86    | 1.98    | 0.5     | 8.41    | 17.89 | 2.11   |
| GAIF01002240.1 | 0       | 0       | 0.03    | 0.03    | 0     | 0      |
| GAIF01002241.1 | 19.46   | 28.08   | 23.45   | 65.1    | 84.62 | 14.18  |
| GAIF01002242.1 | 0       | 0.76    | 1.92    | 0       | 0     | 3.15   |
| GAIF01002243.1 | 0.13    | 0.23    | 0.16    | 0.44    | 0.8   | 0      |
| GAIF01002244.1 | 37.68   | 48.51   | 18.6    | 69.11   | 72.81 | 7.84   |
| GAIF01002245.1 | 17.78   | 5.71    | 4.36    | 21.54   | 33.86 | 20.63  |
| GAIF01002246.1 | 0       | 0.06    | 0.06    | 0       | 1.28  | 0.12   |
| GAIF01002249.1 | 3.08    | 12.15   | 2.54    | 7.9     | 10.81 | 0.14   |
| GAIF01002251.1 | 0.28    | 0.31    | 0       | 3.31    | 12.22 | 0      |
| GAIF01002252.1 | 0       | 0       | 0       | 0       | 0.17  | 0      |

|                |        |        |        |        |        |       |
|----------------|--------|--------|--------|--------|--------|-------|
| GAIF01002253.1 | 0      | 0      | 0      | 0      | 0.18   | 0     |
| GAIF01002254.1 | 51.24  | 54.45  | 36.09  | 84.41  | 105.95 | 37.08 |
| GAIF01002255.1 | 34.31  | 53.68  | 43.75  | 23.49  | 35.9   | 11.16 |
| GAIF01002257.1 | 0.31   | 0.31   | 0.1    | 1.2    | 4.61   | 0.68  |
| GAIF01002258.1 | 0      | 0      | 0      | 0      | 1.81   | 0     |
| GAIF01002259.1 | 0.59   | 0.1    | 0      | 0.99   | 4.46   | 4.02  |
| GAIF01002261.1 | 0      | 0      | 0      | 0.11   | 0.22   | 0     |
| GAIF01002262.1 | 7.37   | 9.37   | 18.2   | 4.39   | 2.64   | 9.55  |
| GAIF01002263.1 | 0.13   | 0      | 0.07   | 149.12 | 0      | 0     |
| GAIF01002264.1 | 0.45   | 0.28   | 0.1    | 2.54   | 7.49   | 0.25  |
| GAIF01002265.1 | 33.31  | 24.26  | 3.51   | 6.27   | 2.15   | 0.13  |
| GAIF01002266.1 | 0      | 0.03   | 0      | 0      | 0      | 0     |
| GAIF01002268.1 | 0      | 0      | 0      | 0      | 0      | 0.09  |
| GAIF01002269.1 | 7.82   | 6.94   | 5.11   | 27.16  | 21.94  | 2.7   |
| GAIF01002270.1 | 0.03   | 0      | 0      | 0      | 0.02   | 0.02  |
| GAIF01002271.1 | 0.05   | 0      | 0      | 0      | 0.09   | 0     |
| GAIF01002273.1 | 0      | 0.15   | 0      | 0.95   | 2.13   | 0     |
| GAIF01002274.1 | 13.99  | 9.23   | 8.96   | 36.13  | 38.26  | 1.6   |
| GAIF01002275.1 | 168.85 | 243.43 | 238.55 | 106.6  | 89.88  | 85.48 |
| GAIF01002276.1 | 0.29   | 0      | 0.13   | 1.42   | 4.42   | 0.26  |
| GAIF01002278.1 | 96.04  | 64.1   | 61.28  | 118.64 | 76.44  | 32.23 |
| GAIF01002280.1 | 0.62   | 0.86   | 0.61   | 1.58   | 0.11   | 0.18  |
| GAIF01002282.1 | 0      | 0.04   | 0.04   | 0      | 0.07   | 0     |
| GAIF01002283.1 | 0      | 0      | 0      | 0      | 1.61   | 0     |
| GAIF01002284.1 | 32.26  | 39.92  | 42.64  | 67.8   | 51.16  | 22.18 |
| GAIF01002285.1 | 0      | 0      | 0      | 0.2    | 0      | 0     |
| GAIF01002286.1 | 0.3    | 0.56   | 0.18   | 0.6    | 0.06   | 0.42  |
| GAIF01002287.1 | 14.54  | 6.79   | 8      | 16.73  | 20.86  | 24.29 |
| GAIF01002288.1 | 0.12   | 0      | 0      | 0.2    | 0.07   | 0.7   |
| GAIF01002290.1 | 9.5    | 10.75  | 10.43  | 17.38  | 15.85  | 4.2   |
| GAIF01002291.1 | 0      | 0.18   | 0      | 0.38   | 0.98   | 0.39  |
| GAIF01002293.1 | 0.31   | 0.25   | 0.08   | 1.25   | 3.88   | 0     |
| GAIF01002295.1 | 1.87   | 0.35   | 1.07   | 3.4    | 5.77   | 3.14  |
| GAIF01002297.1 | 0.06   | 0      | 0.07   | 0.07   | 0.29   | 0     |
| GAIF01002298.1 | 0.5    | 0      | 0      | 0      | 0.6    | 0.14  |
| GAIF01002299.1 | 0      | 0      | 0.06   | 0.12   | 1.11   | 0     |
| GAIF01002303.1 | 0      | 0      | 0      | 0      | 0.1    | 0     |
| GAIF01002304.1 | 0.06   | 0.03   | 0.07   | 0.21   | 0.89   | 0.03  |
| GAIF01002305.1 | 11.21  | 8.38   | 15.98  | 14.07  | 9.74   | 20.16 |
| GAIF01002306.1 | 0      | 0      | 0.12   | 0.66   | 3.06   | 0     |
| GAIF01002307.1 | 0      | 1.15   | 0      | 2.27   | 2.16   | 0     |
| GAIF01002308.1 | 0.39   | 0      | 0      | 1.02   | 12.49  | 0.86  |
| GAIF01002309.1 | 0      | 0.52   | 0.33   | 0      | 0      | 0     |
| GAIF01002311.1 | 0.72   | 0.46   | 0      | 0.28   | 0.5    | 0     |

|                |        |        |        |        |       |       |
|----------------|--------|--------|--------|--------|-------|-------|
| GAIF01002312.1 | 10.1   | 5.34   | 12.87  | 22.51  | 55.15 | 61.35 |
| GAIF01002314.1 | 0.39   | 0.11   | 0.05   | 0.96   | 4.9   | 0.05  |
| GAIF01002316.1 | 1.14   | 2.21   | 0.98   | 4.01   | 27.71 | 0.56  |
| GAIF01002318.1 | 12.56  | 23.35  | 15.13  | 34.11  | 19.46 | 4.74  |
| GAIF01002319.1 | 42.82  | 58.92  | 120.24 | 51.35  | 58.88 | 49.22 |
| GAIF01002320.1 | 11.69  | 6.14   | 6.85   | 4.71   | 2.86  | 2.95  |
| GAIF01002321.1 | 0.07   | 0.07   | 0      | 0.15   | 0.08  | 0     |
| GAIF01002323.1 | 12.73  | 9      | 12.41  | 34.62  | 56.58 | 30.69 |
| GAIF01002324.1 | 3.32   | 3.88   | 6.97   | 10.25  | 5.13  | 3.22  |
| GAIF01002325.1 | 0.57   | 0      | 0      | 0      | 0.14  | 0     |
| GAIF01002326.1 | 5.08   | 3.99   | 2.48   | 14.19  | 11.31 | 0.52  |
| GAIF01002327.1 | 0      | 0.04   | 0      | 0.29   | 0.93  | 0.08  |
| GAIF01002329.1 | 0.29   | 0.28   | 0.41   | 0.35   | 0.9   | 0.35  |
| GAIF01002330.1 | 508.74 | 214.08 | 786.72 | 22.16  | 6.96  | 62.11 |
| GAIF01002331.1 | 5.24   | 5.7    | 0      | 6.09   | 5.18  | 0     |
| GAIF01002332.1 | 13.84  | 29.09  | 25.56  | 29.02  | 53.01 | 32.01 |
| GAIF01002333.1 | 0      | 0.16   | 0      | 0      | 0.18  | 0     |
| GAIF01002334.1 | 0.16   | 0.07   | 0      | 0.6    | 2.92  | 0.14  |
| GAIF01002336.1 | 0.69   | 0      | 0.08   | 2.93   | 10.6  | 0.08  |
| GAIF01002338.1 | 0.52   | 0.11   | 0.11   | 1.33   | 1     | 0.23  |
| GAIF01002339.1 | 0.33   | 0.73   | 0.55   | 2.23   | 3.91  | 0     |
| GAIF01002340.1 | 31.5   | 29.96  | 22.61  | 107.77 | 59.43 | 11.67 |
| GAIF01002341.1 | 0      | 0      | 0      | 3.21   | 4.28  | 0.98  |
| GAIF01002342.1 | 2.75   | 9.05   | 5.25   | 13.86  | 11.84 | 0.88  |
| GAIF01002343.1 | 0.53   | 0      | 0      | 1.03   | 4.06  | 0.05  |
| GAIF01002344.1 | 0      | 0.15   | 0      | 0.55   | 0.19  | 0.05  |
| GAIF01002345.1 | 0.85   | 0      | 0      | 0      | 1.76  | 0     |
| GAIF01002346.1 | 22.16  | 25.92  | 19.31  | 37.94  | 26.09 | 4.91  |
| GAIF01002347.1 | 0      | 0      | 0      | 0.36   | 0.84  | 0     |
| GAIF01002348.1 | 1.32   | 0.56   | 1.03   | 0.35   | 0.1   | 0.04  |
| GAIF01002349.1 | 0.92   | 0.6    | 0      | 2.45   | 8.19  | 1.48  |
| GAIF01002350.1 | 0      | 0      | 0      | 0      | 0.49  | 0     |
| GAIF01002351.1 | 3.32   | 4.57   | 0      | 1.05   | 1.2   | 0.03  |
| GAIF01002352.1 | 0.57   | 0.67   | 0.32   | 0.72   | 0     | 0.16  |
| GAIF01002353.1 | 1.15   | 2      | 0.88   | 3.47   | 3.88  | 0.51  |
| GAIF01002354.1 | 1.26   | 0.37   | 0.18   | 4.45   | 28.62 | 72.19 |
| GAIF01002355.1 | 11.48  | 11.88  | 6.36   | 6.61   | 4.09  | 1.47  |
| GAIF01002356.1 | 0.16   | 0.43   | 0.04   | 0      | 0.13  | 0     |
| GAIF01002357.1 | 14.07  | 6.64   | 8.77   | 13.27  | 5.47  | 25.75 |
| GAIF01002358.1 | 0.11   | 0.06   | 0.06   | 0.13   | 0.34  | 0.06  |
| GAIF01002360.1 | 0.11   | 0.33   | 0.62   | 0      | 0.59  | 0     |
| GAIF01002361.1 | 3.38   | 5.5    | 1.45   | 9.73   | 23.97 | 0     |
| GAIF01002363.1 | 0      | 0      | 0      | 0      | 0.11  | 0     |
| GAIF01002364.1 | 5.62   | 12.66  | 6.42   | 24.91  | 24.95 | 2.58  |

|                |         |         |        |        |        |        |
|----------------|---------|---------|--------|--------|--------|--------|
| GAIF01002366.1 | 3.36    | 2.96    | 0      | 23.05  | 47.18  | 0.18   |
| GAIF01002367.1 | 67.47   | 65.76   | 91.14  | 76.31  | 77.82  | 85.75  |
| GAIF01002368.1 | 15.81   | 9.13    | 6.62   | 32.38  | 16.28  | 104.07 |
| GAIF01002369.1 | 6.95    | 0.83    | 0      | 14.65  | 14.48  | 26.97  |
| GAIF01002370.1 | 22.87   | 27.03   | 56.49  | 3.24   | 1.92   | 5.86   |
| GAIF01002371.1 | 29.2    | 20.72   | 9.67   | 39.71  | 41.11  | 8.2    |
| GAIF01002372.1 | 29.53   | 16.95   | 25.18  | 1.74   | 0.55   | 0.51   |
| GAIF01002373.1 | 104.15  | 133.78  | 155.4  | 140.72 | 115.24 | 65.87  |
| GAIF01002374.1 | 0.06    | 0.21    | 0.1    | 0.11   | 0.27   | 0.02   |
| GAIF01002375.1 | 0.7     | 0.19    | 0      | 4.27   | 12.54  | 1.06   |
| GAIF01002377.1 | 1568.46 | 1193.32 | 686.68 | 307.52 | 201.18 | 171.19 |
| GAIF01002378.1 | 0.07    | 0       | 0      | 0      | 0      | 93.79  |
| GAIF01002381.1 | 0.07    | 0       | 0      | 0.04   | 0.04   | 0.08   |
| GAIF01002382.1 | 0.8     | 0       | 0      | 0.59   | 0.85   | 0      |
| GAIF01002383.1 | 17.51   | 11.76   | 15.08  | 31.88  | 13.83  | 7.38   |
| GAIF01002385.1 | 0       | 0       | 0      | 0.28   | 0.29   | 0      |
| GAIF01002386.1 | 5.5     | 5.23    | 4.68   | 5.74   | 3.64   | 1.06   |
| GAIF01002388.1 | 0       | 0.18    | 1.12   | 0      | 0.04   | 0.4    |
| GAIF01002389.1 | 0       | 0       | 0      | 0.06   | 0.05   | 0      |
| GAIF01002390.1 | 74.42   | 70.01   | 14.31  | 150.34 | 154.76 | 12.32  |
| GAIF01002391.1 | 0       | 0.07    | 0      | 0      | 0.16   | 0      |
| GAIF01002392.1 | 192.31  | 76.04   | 76.77  | 81.16  | 189.22 | 38.53  |
| GAIF01002393.1 | 9.53    | 9.98    | 6.28   | 29.76  | 27.95  | 5.25   |
| GAIF01002395.1 | 0       | 0       | 0      | 0      | 0.05   | 0      |
| GAIF01002397.1 | 0       | 0.03    | 0      | 0.04   | 0.04   | 0      |
| GAIF01002398.1 | 0.11    | 0.06    | 0      | 0      | 0      | 0.13   |
| GAIF01002399.1 | 59.74   | 19.15   | 10.84  | 0      | 0      | 0.12   |
| GAIF01002400.1 | 11.38   | 11.06   | 11.98  | 22.99  | 25.15  | 18.89  |
| GAIF01002401.1 | 84.28   | 167.91  | 110.3  | 148.63 | 151.29 | 28.72  |
| GAIF01002403.1 | 2.01    | 3.68    | 1.91   | 6.17   | 3.66   | 0.35   |
| GAIF01002405.1 | 56.61   | 47.15   | 43.42  | 151.33 | 72.67  | 22.79  |
| GAIF01002406.1 | 0.01    | 0.1     | 0.01   | 0.02   | 0.2    | 0.01   |
| GAIF01002408.1 | 0.2     | 0.06    | 0      | 0.07   | 0.15   | 0.07   |
| GAIF01002409.1 | 22.76   | 17.65   | 22.89  | 29.72  | 25.41  | 33.21  |
| GAIF01002411.1 | 0.85    | 0.4     | 0.76   | 0.85   | 0.29   | 0.04   |
| GAIF01002413.1 | 0       | 0       | 0      | 0.26   | 0.38   | 0      |
| GAIF01002414.1 | 0       | 0.06    | 0      | 0      | 0      | 0      |
| GAIF01002415.1 | 24.94   | 10.95   | 11.39  | 9.68   | 8.85   | 4.51   |
| GAIF01002417.1 | 0       | 0.11    | 0.22   | 0.12   | 0.12   | 0      |
| GAIF01002419.1 | 0       | 0       | 0      | 0.26   | 0      | 0      |
| GAIF01002420.1 | 1.57    | 0.2     | 0.15   | 3.49   | 11.62  | 1.02   |
| GAIF01002421.1 | 1.15    | 0.63    | 0.18   | 6.1    | 15.71  | 1.36   |
| GAIF01002423.1 | 0.17    | 0       | 0      | 0.39   | 0.2    | 0      |
| GAIF01002425.1 | 0       | 0       | 0      | 0.1    | 0.32   | 0.1    |

|                |        |        |        |        |        |         |
|----------------|--------|--------|--------|--------|--------|---------|
| GAIF01002427.1 | 6.78   | 0.59   | 1.98   | 4.4    | 0.22   | 1.59    |
| GAIF01002428.1 | 0.12   | 0      | 0      | 0      | 0      | 0       |
| GAIF01002429.1 | 0.4    | 0.57   | 0.22   | 0.97   | 1.43   | 0       |
| GAIF01002431.1 | 0      | 0      | 0      | 0      | 0      | 1.76    |
| GAIF01002433.1 | 7.96   | 30.97  | 0      | 10.53  | 0      | 7.94    |
| GAIF01002434.1 | 3.33   | 2.61   | 3.82   | 4.72   | 5.52   | 1.69    |
| GAIF01002435.1 | 0      | 0      | 0      | 0.32   | 0      | 0.31    |
| GAIF01002439.1 | 1.03   | 0.09   | 0.19   | 0.65   | 4.12   | 0       |
| GAIF01002440.1 | 0      | 0.03   | 0.07   | 0      | 0      | 0       |
| GAIF01002441.1 | 0.28   | 0      | 0      | 3.29   | 17.42  | 0.06    |
| GAIF01002443.1 | 21.04  | 40.5   | 13.36  | 50.37  | 50.91  | 4.71    |
| GAIF01002444.1 | 48.2   | 77.38  | 60.53  | 86.34  | 53.36  | 16.74   |
| GAIF01002445.1 | 0.26   | 0.39   | 0      | 0.38   | 0      | 0       |
| GAIF01002446.1 | 1.67   | 1.11   | 0.32   | 2.09   | 3.06   | 0.16    |
| GAIF01002448.1 | 39.72  | 56.52  | 24.87  | 129.81 | 79.84  | 11.69   |
| GAIF01002449.1 | 0      | 0      | 0      | 0.05   | 0      | 0       |
| GAIF01002450.1 | 0.1    | 0      | 0      | 1.35   | 7.74   | 0       |
| GAIF01002451.1 | 0.35   | 0      | 0      | 1.37   | 6.95   | 4.68    |
| GAIF01002452.1 | 0.81   | 0.4    | 0.25   | 0.06   | 0.33   | 0.04    |
| GAIF01002454.1 | 12.7   | 0      | 1.23   | 14.95  | 4.55   | 4.94    |
| GAIF01002456.1 | 0.09   | 0.14   | 0      | 0      | 0      | 0       |
| GAIF01002458.1 | 1.94   | 2.53   | 2.13   | 5.7    | 5.29   | 0.86    |
| GAIF01002459.1 | 371.91 | 209.79 | 211.06 | 516.35 | 380.05 | 2091.38 |
| GAIF01002460.1 | 0.1    | 0.11   | 0      | 0.12   | 1.56   | 0.22    |
| GAIF01002462.1 | 0.07   | 0      | 0      | 0.25   | 0.88   | 0       |
| GAIF01002463.1 | 4.88   | 7.84   | 4.42   | 2.09   | 2.55   | 0.58    |
| GAIF01002464.1 | 0      | 0      | 0      | 0.15   | 0      | 0       |
| GAIF01002466.1 | 15.46  | 15.41  | 11.55  | 26.42  | 31.89  | 47.68   |
| GAIF01002467.1 | 0.08   | 0      | 0      | 0      | 0.18   | 0       |
| GAIF01002468.1 | 8.13   | 11.59  | 10.05  | 13.38  | 17.67  | 3.99    |
| GAIF01002469.1 | 0.98   | 0      | 0.14   | 3      | 14.38  | 1.37    |
| GAIF01002470.1 | 0.3    | 0.08   | 0      | 1.11   | 7.74   | 0.16    |
| GAIF01002474.1 | 0.23   | 0      | 0      | 0.49   | 0.37   | 0       |
| GAIF01002475.1 | 0.32   | 0      | 0      | 0.5    | 0      | 0.24    |
| GAIF01002476.1 | 0      | 2.08   | 1.07   | 3.32   | 5.72   | 0       |
| GAIF01002477.1 | 0.21   | 0.05   | 0.05   | 0.39   | 1.33   | 0.19    |
| GAIF01002478.1 | 1      | 0.4    | 0      | 1.9    | 1.56   | 1.28    |
| GAIF01002479.1 | 0      | 0      | 0      | 0.03   | 0.04   | 0       |
| GAIF01002480.1 | 0.03   | 0      | 0.06   | 0.33   | 1.42   | 0.09    |
| GAIF01002482.1 | 0      | 0      | 0      | 0      | 0.21   | 0       |
| GAIF01002483.1 | 0      | 0.15   | 0      | 0.4    | 2.29   | 0       |
| GAIF01002484.1 | 0      | 0      | 0      | 0.6    | 0.79   | 0       |
| GAIF01002485.1 | 2.78   | 0.98   | 1.85   | 3.4    | 3.13   | 0.66    |
| GAIF01002486.1 | 0.09   | 0      | 0      | 0      | 0      | 0       |



|                |        |        |        |        |       |       |
|----------------|--------|--------|--------|--------|-------|-------|
| GAIF01002487.1 | 0      | 0.03   | 0      | 0      | 0     | 0     |
| GAIF01002489.1 | 6.33   | 7.41   | 1.76   | 6.07   | 4.58  | 0.31  |
| GAIF01002490.1 | 0      | 0      | 0      | 0.06   | 0.03  | 0     |
| GAIF01002491.1 | 0.77   | 0.12   | 0.44   | 4.49   | 0     | 1.43  |
| GAIF01002492.1 | 0      | 0      | 0      | 0      | 15.77 | 71.82 |
| GAIF01002493.1 | 0      | 0.03   | 0.18   | 0.1    | 0.03  | 0.03  |
| GAIF01002496.1 | 0.16   | 0.15   | 0.05   | 0.4    | 1.02  | 0.1   |
| GAIF01002497.1 | 16.35  | 21.19  | 35.86  | 98.49  | 37.97 | 42.67 |
| GAIF01002498.1 | 0      | 0.03   | 0      | 0      | 0     | 0     |
| GAIF01002499.1 | 0.18   | 0      | 0      | 0      | 0     | 0     |
| GAIF01002500.1 | 0      | 0.09   | 0.09   | 0.48   | 0.49  | 0     |
| GAIF01002501.1 | 17.47  | 12.02  | 13.96  | 45     | 23.83 | 37.56 |
| GAIF01002502.1 | 0.18   | 0      | 0.2    | 0.93   | 0.64  | 0     |
| GAIF01002504.1 | 0      | 0.08   | 0      | 0      | 0     | 0     |
| GAIF01002506.1 | 333.48 | 172.19 | 291.27 | 145.36 | 72.13 | 152.5 |
| GAIF01002507.1 | 0      | 0.12   | 0      | 0      | 0     | 0     |
| GAIF01002508.1 | 0      | 0.09   | 0.04   | 0      | 0     | 0     |
| GAIF01002509.1 | 31.76  | 22.63  | 37.56  | 10.88  | 6.94  | 7.28  |
| GAIF01002515.1 | 0.08   | 0.05   | 0      | 0      | 0.1   | 0     |
| GAIF01002516.1 | 0.05   | 0      | 0      | 0      | 0     | 0     |
| GAIF01002517.1 | 0.67   | 0      | 0      | 0.77   | 3.47  | 0.73  |
| GAIF01002518.1 | 0      | 0      | 0      | 0.25   | 0     | 0     |
| GAIF01002519.1 | 1.1    | 0.78   | 0.94   | 6.53   | 16.68 | 1.58  |
| GAIF01002520.1 | 40.15  | 36.47  | 24.54  | 24.08  | 37.34 | 4.27  |
| GAIF01002521.1 | 15.43  | 8.85   | 34.73  | 17.16  | 12.75 | 0     |
| GAIF01002522.1 | 1.33   | 2.24   | 0.12   | 4.07   | 12.08 | 0.25  |
| GAIF01002524.1 | 0      | 0      | 0      | 0.05   | 0.53  | 0.63  |
| GAIF01002525.1 | 0.21   | 0.15   | 0.08   | 0.24   | 3.81  | 0     |
| GAIF01002527.1 | 0.06   | 0.12   | 0.25   | 1.55   | 2.28  | 0.62  |
| GAIF01002528.1 | 211.26 | 226.87 | 55.25  | 70.37  | 164   | 12.96 |
| GAIF01002530.1 | 0.18   | 0      | 0.1    | 0      | 0     | 0.19  |
| GAIF01002533.1 | 0.14   | 0      | 0.14   | 0.25   | 0     | 0     |
| GAIF01002534.1 | 0      | 0      | 0.36   | 0.88   | 1.69  | 0     |
| GAIF01002536.1 | 0.96   | 1.6    | 0.06   | 9.33   | 26.83 | 0.34  |
| GAIF01002537.1 | 0      | 0.2    | 0      | 0      | 0.62  | 2.22  |
| GAIF01002538.1 | 18.69  | 22.07  | 17.72  | 34.12  | 24.23 | 11.53 |
| GAIF01002539.1 | 1.81   | 1.57   | 0.4    | 10.21  | 19.56 | 0.2   |
| GAIF01002540.1 | 0      | 0      | 0.07   | 0      | 0     | 0     |
| GAIF01002541.1 | 7.97   | 5.82   | 5.02   | 9.25   | 25.92 | 20.87 |
| GAIF01002544.1 | 0      | 0.1    | 0      | 0      | 0.05  | 0     |
| GAIF01002545.1 | 0      | 0      | 0.17   | 0      | 0     | 0     |
| GAIF01002546.1 | 0      | 0      | 0      | 0      | 0.87  | 0     |
| GAIF01002548.1 | 0.85   | 0.73   | 1.6    | 0.71   | 0.8   | 0.2   |
| GAIF01002549.1 | 3.67   | 4.34   | 1.68   | 5.66   | 6.22  | 1.43  |

|                |        |        |        |        |        |       |
|----------------|--------|--------|--------|--------|--------|-------|
| GAIF01002550.1 | 21.88  | 10.25  | 14.81  | 20.98  | 17.32  | 21.95 |
| GAIF01002552.1 | 0.23   | 0      | 0      | 0.14   | 0      | 0     |
| GAIF01002553.1 | 0      | 0      | 0.09   | 0.28   | 1.11   | 0     |
| GAIF01002555.1 | 0      | 0      | 0      | 0.67   | 0.17   | 0     |
| GAIF01002556.1 | 0      | 0      | 0      | 0      | 0.32   | 0     |
| GAIF01002558.1 | 0.06   | 0.88   | 0.92   | 0      | 0.1    | 0.18  |
| GAIF01002559.1 | 5.03   | 2.49   | 3.41   | 1.47   | 0.66   | 0     |
| GAIF01002561.1 | 4.36   | 1.92   | 1.79   | 8.16   | 2.69   | 7.97  |
| GAIF01002562.1 | 2      | 4.95   | 4.19   | 1.67   | 0.65   | 0.32  |
| GAIF01002565.1 | 0      | 0      | 0      | 0      | 4.36   | 2.3   |
| GAIF01002566.1 | 17.99  | 10.45  | 25.51  | 33.84  | 15.58  | 27.95 |
| GAIF01002567.1 | 4.37   | 0      | 0      | 4.78   | 5.33   | 4.54  |
| GAIF01002568.1 | 0      | 0      | 0      | 0      | 0.16   | 0     |
| GAIF01002569.1 | 26.9   | 39.62  | 18.91  | 52.2   | 33.38  | 2.82  |
| GAIF01002570.1 | 0.22   | 0.03   | 0.04   | 0.14   | 0.06   | 0.38  |
| GAIF01002571.1 | 1.01   | 3.61   | 0.56   | 1.86   | 4.68   | 0.24  |
| GAIF01002572.1 | 0      | 18.58  | 12.46  | 0      | 0      | 3.52  |
| GAIF01002573.1 | 0.5    | 0.55   | 0      | 1.47   | 8.08   | 0.06  |
| GAIF01002574.1 | 0      | 0      | 0      | 0      | 0.31   | 0     |
| GAIF01002575.1 | 28.9   | 53.71  | 35.73  | 71.89  | 67.55  | 9.45  |
| GAIF01002576.1 | 0.4    | 0      | 0      | 0.23   | 0.48   | 0     |
| GAIF01002577.1 | 25.75  | 126.51 | 68.32  | 27.14  | 6.03   | 2.48  |
| GAIF01002578.1 | 0.8    | 0      | 0.52   | 0.86   | 5.9    | 0.52  |
| GAIF01002580.1 | 30.68  | 21.41  | 17.04  | 58.45  | 44.3   | 15.24 |
| GAIF01002581.1 | 0.2    | 0.2    | 0      | 2.58   | 12.11  | 0.11  |
| GAIF01002582.1 | 0      | 0      | 0      | 79.65  | 0      | 0.13  |
| GAIF01002583.1 | 12.17  | 15.81  | 8.26   | 42.33  | 52.98  | 4.09  |
| GAIF01002584.1 | 0.22   | 0.1    | 0.01   | 0.05   | 0.01   | 0.04  |
| GAIF01002585.1 | 109.69 | 110.94 | 70.09  | 12.12  | 12.61  | 22.79 |
| GAIF01002586.1 | 0      | 0      | 0      | 0      | 0      | 0.42  |
| GAIF01002587.1 | 0      | 0      | 0      | 0      | 0      | 0.38  |
| GAIF01002589.1 | 0.55   | 0      | 0      | 3.66   | 19.13  | 0.76  |
| GAIF01002592.1 | 198.18 | 84.25  | 54.18  | 103.84 | 117.85 | 69.47 |
| GAIF01002593.1 | 0      | 0.07   | 0      | 0.71   | 2.06   | 0.04  |
| GAIF01002594.1 | 0      | 1.16   | 0.55   | 0.15   | 0      | 0.05  |
| GAIF01002595.1 | 0      | 0      | 0      | 0      | 0      | 67.84 |
| GAIF01002596.1 | 32.45  | 17.18  | 23.42  | 44.76  | 51.13  | 64.18 |
| GAIF01002599.1 | 0.14   | 0      | 0      | 0.08   | 0.09   | 0     |
| GAIF01002601.1 | 28.83  | 45.19  | 31.49  | 18.62  | 21.67  | 2.56  |
| GAIF01002603.1 | 7.22   | 3.86   | 2.69   | 29.83  | 37.09  | 1.08  |
| GAIF01002605.1 | 0      | 0      | 0      | 0      | 0.27   | 0     |
| GAIF01002606.1 | 23.17  | 15.28  | 12.03  | 51.99  | 58.46  | 3.53  |
| GAIF01002607.1 | 14.63  | 25.37  | 5.83   | 49.81  | 60.02  | 2.77  |
| GAIF01002608.1 | 158.41 | 154.05 | 219.76 | 50.27  | 24.75  | 30.63 |

|                |        |        |        |        |        |        |
|----------------|--------|--------|--------|--------|--------|--------|
| GAIF01002609.1 | 0.1    | 0      | 0.05   | 0.17   | 0      | 0.05   |
| GAIF01002610.1 | 5.24   | 2.92   | 3.37   | 6.67   | 2.92   | 5.91   |
| GAIF01002611.1 | 317.39 | 355.87 | 402.85 | 785.49 | 632.15 | 253.46 |
| GAIF01002613.1 | 13.5   | 6.87   | 13.22  | 28.86  | 44.54  | 50.98  |
| GAIF01002614.1 | 0.15   | 0      | 0      | 0.09   | 0.54   | 0      |
| GAIF01002615.1 | 0      | 0      | 0      | 0      | 0.11   | 0      |
| GAIF01002616.1 | 0.13   | 0.14   | 0      | 0.31   | 0.8    | 0.15   |
| GAIF01002617.1 | 0.31   | 0      | 0      | 3.98   | 17.06  | 0.86   |
| GAIF01002618.1 | 1.53   | 1.66   | 0      | 12.79  | 10.49  | 4.77   |
| GAIF01002619.1 | 0.69   | 0.22   | 0      | 8.12   | 6.47   | 1.13   |
| GAIF01002621.1 | 11.34  | 2.6    | 2.9    | 2.47   | 2.13   | 1.71   |
| GAIF01002622.1 | 0.56   | 0.18   | 0.18   | 2.9    | 6.58   | 1.24   |
| GAIF01002623.1 | 15.39  | 23.18  | 14.64  | 68.57  | 37.78  | 4.46   |
| GAIF01002624.1 | 1.04   | 0      | 0.11   | 0.36   | 0.35   | 0.19   |
| GAIF01002625.1 | 11.43  | 10.46  | 5.46   | 25.88  | 22.24  | 3.31   |
| GAIF01002627.1 | 0.61   | 0      | 0.4    | 0.99   | 10.82  | 0.13   |
| GAIF01002628.1 | 1.26   | 0.31   | 0.71   | 2.22   | 0.67   | 0.35   |
| GAIF01002629.1 | 0.21   | 0.38   | 0.36   | 0.55   | 0.21   | 0.16   |
| GAIF01002630.1 | 0.22   | 0      | 0      | 2.02   | 5.51   | 0.24   |
| GAIF01002631.1 | 32.8   | 15.99  | 4.75   | 59.89  | 54.76  | 24.86  |
| GAIF01002632.1 | 2.22   | 0.19   | 0.09   | 12.86  | 27.69  | 0.18   |
| GAIF01002633.1 | 149.27 | 84.7   | 19.68  | 86.24  | 174.83 | 12.13  |
| GAIF01002634.1 | 161.45 | 43.06  | 27.97  | 14.53  | 19.5   | 8.19   |
| GAIF01002635.1 | 13.19  | 9.09   | 6.57   | 24.18  | 10.58  | 3.89   |
| GAIF01002636.1 | 0      | 0      | 0      | 0      | 0.05   | 0      |
| GAIF01002638.1 | 0.91   | 0      | 0      | 0      | 0      | 0      |
| GAIF01002639.1 | 16.67  | 27.12  | 20.09  | 19.06  | 14.81  | 5.33   |
| GAIF01002640.1 | 0.05   | 0.13   | 0      | 0.12   | 0.33   | 0      |
| GAIF01002642.1 | 0      | 0      | 0      | 0      | 0      | 0.03   |
| GAIF01002643.1 | 0      | 0      | 0      | 0.16   | 0      | 0.3    |
| GAIF01002647.1 | 0      | 0      | 0      | 0.29   | 1.25   | 0.06   |
| GAIF01002648.1 | 0.02   | 0.06   | 0      | 0      | 0      | 0      |
| GAIF01002649.1 | 0.03   | 0      | 0      | 0      | 0      | 0      |
| GAIF01002653.1 | 0      | 0      | 0      | 0      | 0      | 0.05   |
| GAIF01002654.1 | 1.34   | 0      | 0      | 6.14   | 21.51  | 0.16   |
| GAIF01002656.1 | 191.54 | 65.09  | 71.63  | 209.11 | 65.46  | 18.88  |
| GAIF01002657.1 | 0.22   | 0      | 0      | 0      | 2.17   | 0.41   |
| GAIF01002658.1 | 0.2    | 0      | 0      | 0.06   | 0      | 0      |
| GAIF01002659.1 | 24.46  | 10.55  | 10.44  | 31.95  | 27.41  | 14.73  |
| GAIF01002660.1 | 0      | 0.35   | 0      | 0      | 0      | 0      |
| GAIF01002661.1 | 182.05 | 115.41 | 130.19 | 16.32  | 6.73   | 8.91   |
| GAIF01002663.1 | 1.62   | 0.96   | 0.81   | 0.17   | 0      | 0.16   |
| GAIF01002664.1 | 11.82  | 4.13   | 2      | 18.67  | 4.76   | 1.38   |
| GAIF01002666.1 | 512.9  | 46.01  | 74.75  | 275.42 | 115.17 | 710.29 |

|                |        |        |        |        |        |         |
|----------------|--------|--------|--------|--------|--------|---------|
| GAIF01002669.1 | 118.4  | 23.16  | 54.23  | 74.08  | 76.65  | 236.83  |
| GAIF01002670.1 | 10.58  | 16.37  | 18.12  | 22.52  | 10.76  | 6.93    |
| GAIF01002671.1 | 26.46  | 13.56  | 16.8   | 41.85  | 56.24  | 157.06  |
| GAIF01002672.1 | 0.54   | 0.29   | 0.07   | 1.54   | 6.17   | 0       |
| GAIF01002673.1 | 0      | 0      | 0      | 0.39   | 0.4    | 0       |
| GAIF01002674.1 | 0      | 0      | 0      | 0      | 0.12   | 0       |
| GAIF01002675.1 | 0.19   | 0.2    | 0      | 0.43   | 0.66   | 0.61    |
| GAIF01002676.1 | 1.42   | 1.92   | 0.5    | 1.85   | 6.84   | 0.06    |
| GAIF01002677.1 | 0      | 0      | 0      | 0.02   | 0.29   | 0       |
| GAIF01002679.1 | 175.39 | 72.39  | 71.59  | 382.32 | 610    | 1933.64 |
| GAIF01002680.1 | 2.29   | 0.43   | 0.05   | 8.5    | 37.69  | 1.08    |
| GAIF01002681.1 | 38.83  | 17.75  | 27.39  | 24.08  | 10.85  | 37.68   |
| GAIF01002682.1 | 0.03   | 0.03   | 0      | 0.03   | 0      | 0.03    |
| GAIF01002685.1 | 111.05 | 116.99 | 49.67  | 168.52 | 134.77 | 13.42   |
| GAIF01002686.1 | 0      | 0      | 0      | 17.6   | 45.48  | 0       |
| GAIF01002687.1 | 0.26   | 0.14   | 0      | 0      | 0      | 0       |
| GAIF01002688.1 | 0      | 0.24   | 0      | 0      | 0.26   | 0       |
| GAIF01002689.1 | 3.62   | 2.41   | 0.81   | 39.58  | 125.08 | 2.85    |
| GAIF01002690.1 | 0.29   | 0.68   | 0      | 0.12   | 0.64   | 0       |
| GAIF01002691.1 | 0.17   | 0.17   | 0.15   | 0.23   | 0.28   | 0       |
| GAIF01002692.1 | 1.27   | 1.05   | 0.24   | 7.3    | 21.02  | 0.05    |
| GAIF01002695.1 | 0.03   | 0.06   | 0      | 0.19   | 0.73   | 0       |
| GAIF01002696.1 | 0.85   | 1.02   | 0.21   | 2.93   | 6.43   | 0.44    |
| GAIF01002697.1 | 0      | 0      | 0      | 0      | 0.14   | 0       |
| GAIF01002699.1 | 6.4    | 6.44   | 2.32   | 17.51  | 21.09  | 9.76    |
| GAIF01002701.1 | 0.04   | 0.04   | 0.04   | 0      | 0.03   | 0       |
| GAIF01002702.1 | 53.02  | 62.32  | 29.29  | 139.76 | 146.57 | 11.46   |
| GAIF01002703.1 | 0      | 0.21   | 0      | 0.11   | 0.36   | 0       |
| GAIF01002704.1 | 1.65   | 0.97   | 0      | 7.21   | 22.73  | 0       |
| GAIF01002705.1 | 0      | 0      | 0.15   | 0.63   | 3.58   | 0.3     |
| GAIF01002706.1 | 4.06   | 9.02   | 5.94   | 18.05  | 13.18  | 1.83    |
| GAIF01002707.1 | 0      | 0      | 0      | 0      | 0.61   | 0       |
| GAIF01002708.1 | 6.97   | 4.61   | 2.74   | 25.8   | 18.5   | 4.61    |
| GAIF01002711.1 | 7.29   | 3.88   | 5.07   | 1.51   | 1.99   | 3.89    |
| GAIF01002712.1 | 4.46   | 2.43   | 3.81   | 0.58   | 0.6    | 3.01    |
| GAIF01002713.1 | 0      | 0.07   | 0      | 0.32   | 1.65   | 0       |
| GAIF01002716.1 | 1.24   | 1.15   | 1.16   | 3.89   | 0.42   | 0.19    |
| GAIF01002717.1 | 0.19   | 0.34   | 0.41   | 3.4    | 7.57   | 0.07    |
| GAIF01002718.1 | 13.32  | 7.3    | 9.36   | 8.16   | 3.84   | 7.99    |
| GAIF01002720.1 | 53.28  | 80.62  | 79.02  | 274.19 | 192.77 | 40.38   |
| GAIF01002723.1 | 440.21 | 103.69 | 203.92 | 324.57 | 73.89  | 140.63  |
| GAIF01002724.1 | 0.46   | 0.4    | 0.1    | 1.6    | 0.33   | 0       |
| GAIF01002725.1 | 0.27   | 0      | 0      | 0      | 0      | 0       |
| GAIF01002726.1 | 0.03   | 0      | 0.03   | 0.34   | 1.24   | 0.06    |

|                |          |          |          |         |         |          |
|----------------|----------|----------|----------|---------|---------|----------|
| GAIF01002728.1 | 11961.62 | 13151.98 | 31159.75 | 8097.02 | 4758.47 | 26674.68 |
| GAIF01002729.1 | 11.59    | 10.35    | 10.59    | 23.26   | 11.52   | 5.52     |
| GAIF01002730.1 | 1.23     | 0        | 0        | 1.16    | 0       | 0.25     |
| GAIF01002732.1 | 0        | 0        | 0        | 0       | 0.42    | 0.15     |
| GAIF01002734.1 | 0.12     | 0        | 0        | 0       | 0       | 0        |
| GAIF01002735.1 | 32.2     | 20.3     | 15.49    | 34.81   | 13.26   | 22.6     |
| GAIF01002737.1 | 5853.46  | 7499.23  | 12331.98 | 3368.03 | 2773.71 | 14706.47 |
| GAIF01002738.1 | 0        | 0        | 9.32     | 0       | 0       | 0        |
| GAIF01002739.1 | 0        | 0        | 0.07     | 0       | 1.06    | 0        |
| GAIF01002741.1 | 7.58     | 3.93     | 7.39     | 25.56   | 29.56   | 16.39    |
| GAIF01002742.1 | 10.27    | 6.73     | 8.8      | 51.61   | 126.93  | 116.28   |
| GAIF01002743.1 | 0        | 8.28     | 1.95     | 0.14    | 0.14    | 2.18     |
| GAIF01002744.1 | 8.03     | 5.02     | 6.04     | 15.02   | 10.74   | 37.55    |
| GAIF01002745.1 | 0.11     | 0.24     | 0.12     | 0.91    | 8.63    | 0.12     |
| GAIF01002746.1 | 31.92    | 23.03    | 23.54    | 78.9    | 46.4    | 98.97    |
| GAIF01002747.1 | 0.31     | 0        | 0        | 0.32    | 2.06    | 0        |
| GAIF01002748.1 | 0.19     | 0        | 0        | 0.04    | 0       | 0.03     |
| GAIF01002751.1 | 2.12     | 1.58     | 0.14     | 0.43    | 0.2     | 0        |
| GAIF01002752.1 | 32.65    | 33.4     | 8.7      | 8.24    | 8.36    | 17.98    |
| GAIF01002753.1 | 370.36   | 206.79   | 142.11   | 243.8   | 82.12   | 34.45    |
| GAIF01002754.1 | 0.06     | 0.12     | 0.02     | 0.15    | 0.16    | 0.02     |
| GAIF01002755.1 | 49.63    | 47.49    | 52.12    | 41.41   | 21.58   | 17.63    |
| GAIF01002756.1 | 3.29     | 3.76     | 3.31     | 3.82    | 2.18    | 1.15     |
| GAIF01002757.1 | 1.79     | 0        | 7.03     | 0       | 0       | 0        |
| GAIF01002758.1 | 5.57     | 4.92     | 5.39     | 4.85    | 3.46    | 1.06     |
| GAIF01002760.1 | 7.38     | 10.89    | 9.01     | 33.7    | 22.95   | 3.81     |
| GAIF01002762.1 | 0        | 0        | 0        | 0       | 0.16    | 0        |
| GAIF01002764.1 | 1.74     | 0.17     | 0.87     | 1.29    | 1.9     | 0.52     |
| GAIF01002766.1 | 0        | 0        | 0        | 0       | 0.11    | 0        |
| GAIF01002767.1 | 0        | 0        | 0        | 0.14    | 0       | 0        |
| GAIF01002768.1 | 0        | 0        | 0        | 0.13    | 0       | 0        |
| GAIF01002769.1 | 0.13     | 0.31     | 0.14     | 0.52    | 0.5     | 0.04     |
| GAIF01002770.1 | 0        | 0.11     | 0        | 0       | 0       | 0        |
| GAIF01002771.1 | 47.75    | 23.79    | 40.69    | 40.07   | 43.68   | 81.97    |
| GAIF01002772.1 | 0.79     | 0.58     | 2.18     | 0.46    | 0.12    | 1.11     |
| GAIF01002773.1 | 4.58     | 12.1     | 4.85     | 28.3    | 27.95   | 3.07     |
| GAIF01002774.1 | 2.98     | 1.53     | 1.63     | 9.02    | 9.64    | 2.64     |
| GAIF01002778.1 | 7.85     | 14.31    | 20.64    | 28.13   | 17.64   | 8.51     |
| GAIF01002779.1 | 2.45     | 0.29     | 0.13     | 5.09    | 22.58   | 0.81     |
| GAIF01002781.1 | 0        | 0.13     | 0        | 0       | 0       | 0        |
| GAIF01002784.1 | 0        | 0        | 0        | 0.12    | 0       | 0        |
| GAIF01002785.1 | 0        | 0        | 0        | 0.51    | 0.97    | 0        |
| GAIF01002786.1 | 0        | 0.01     | 0        | 0       | 0.02    | 0        |
| GAIF01002788.1 | 0        | 0        | 0        | 0.03    | 0.55    | 0        |

|                |         |         |         |         |        |         |
|----------------|---------|---------|---------|---------|--------|---------|
| GAIF01002790.1 | 0.19    | 0.17    | 0       | 0       | 0      | 0       |
| GAIF01002792.1 | 0       | 0       | 0       | 0.09    | 0      | 0       |
| GAIF01002793.1 | 0       | 0.32    | 0       | 1.85    | 6.59   | 0.33    |
| GAIF01002794.1 | 6.26    | 10.14   | 4.52    | 9.31    | 9.23   | 0.64    |
| GAIF01002795.1 | 94.07   | 78.65   | 18.67   | 264.17  | 279.67 | 12.41   |
| GAIF01002796.1 | 0.11    | 0.18    | 0       | 0.25    | 0.64   | 0       |
| GAIF01002799.1 | 430.43  | 243.83  | 187.92  | 1800.72 | 762.13 | 202.02  |
| GAIF01002800.1 | 9.9     | 15.68   | 12.38   | 29.95   | 19.61  | 2.84    |
| GAIF01002801.1 | 0.52    | 0.38    | 0       | 1.8     | 6.54   | 0.1     |
| GAIF01002805.1 | 0       | 0       | 0       | 0.54    | 1.37   | 0       |
| GAIF01002806.1 | 1351.79 | 1090.14 | 1772.34 | 566.46  | 754.57 | 6067.05 |
| GAIF01002807.1 | 27.03   | 18.47   | 36.69   | 72.61   | 53     | 292.96  |
| GAIF01002808.1 | 17.03   | 29.99   | 5.75    | 27.01   | 55.39  | 0.29    |
| GAIF01002809.1 | 0       | 0.1     | 0.1     | 0       | 0      | 0       |
| GAIF01002810.1 | 20.99   | 18.53   | 25.38   | 25.03   | 26.8   | 8.2     |
| GAIF01002811.1 | 1.75    | 0.78    | 0       | 0.27    | 1.39   | 0       |
| GAIF01002812.1 | 0       | 0       | 0       | 0.33    | 0.69   | 0       |
| GAIF01002815.1 | 0.35    | 0.12    | 0       | 3.13    | 11.89  | 0.09    |
| GAIF01002819.1 | 20.43   | 14.18   | 14.81   | 21.99   | 16.54  | 34.45   |
| GAIF01002820.1 | 0.66    | 0       | 0       | 1.39    | 4.89   | 1.91    |
| GAIF01002822.1 | 5.75    | 3.89    | 5.95    | 7.55    | 1.96   | 3.71    |
| GAIF01002823.1 | 7.16    | 16.26   | 28.5    | 5.61    | 9.91   | 4.88    |
| GAIF01002825.1 | 8.07    | 1       | 3.91    | 19.19   | 2.36   | 0.98    |
| GAIF01002826.1 | 0.37    | 0.15    | 0.48    | 0       | 0      | 0       |
| GAIF01002827.1 | 0       | 0.04    | 0       | 0       | 0.04   | 0       |
| GAIF01002828.1 | 15.05   | 21.07   | 9.51    | 29.44   | 29.02  | 5.35    |
| GAIF01002829.1 | 0       | 0       | 0       | 0.19    | 0.24   | 0       |
| GAIF01002830.1 | 0.92    | 0.54    | 0.27    | 6.47    | 32.21  | 0.83    |
| GAIF01002834.1 | 0       | 0.2     | 0       | 0       | 0      | 0       |
| GAIF01002836.1 | 0       | 0       | 1.52    | 0       | 0      | 0       |
| GAIF01002837.1 | 0       | 0.07    | 0       | 0.15    | 0.38   | 0       |
| GAIF01002838.1 | 0       | 0.4     | 0.45    | 0       | 0.09   | 0.94    |
| GAIF01002839.1 | 0.21    | 0.12    | 0.16    | 2.05    | 4.71   | 0.45    |
| GAIF01002840.1 | 109.64  | 137.17  | 282.93  | 43.74   | 39.85  | 168.2   |
| GAIF01002841.1 | 0       | 0       | 0       | 0.3     | 0.63   | 0.43    |
| GAIF01002844.1 | 0       | 0       | 0       | 0       | 0      | 0.02    |
| GAIF01002845.1 | 0.12    | 0.53    | 0.13    | 1.49    | 2.58   | 0       |
| GAIF01002847.1 | 0.37    | 0       | 0       | 0.74    | 1.32   | 0       |
| GAIF01002849.1 | 0.19    | 0.17    | 0.16    | 0.48    | 1.49   | 0.14    |
| GAIF01002851.1 | 0.85    | 0.94    | 0.94    | 0.11    | 0      | 0       |
| GAIF01002852.1 | 0       | 0       | 0.13    | 0       | 0      | 0       |
| GAIF01002853.1 | 25.02   | 13.47   | 7.31    | 92.31   | 179.49 | 27.04   |
| GAIF01002854.1 | 0       | 0       | 0       | 0.14    | 2.46   | 0       |
| GAIF01002857.1 | 0       | 0       | 0       | 3.48    | 12.61  | 11.56   |

|                |         |        |         |        |        |        |
|----------------|---------|--------|---------|--------|--------|--------|
| GAIF01002859.1 | 0       | 0      | 0       | 0      | 0.35   | 0      |
| GAIF01002860.1 | 2.34    | 2.59   | 3.79    | 0      | 0      | 0.05   |
| GAIF01002862.1 | 0.05    | 0.46   | 0.12    | 0.37   | 0.57   | 0      |
| GAIF01002863.1 | 18.05   | 23.46  | 10.11   | 41.68  | 36.1   | 3.6    |
| GAIF01002864.1 | 22.12   | 15.88  | 11.04   | 55.72  | 69.97  | 11.56  |
| GAIF01002865.1 | 0.5     | 0      | 0.16    | 0.26   | 0.26   | 0.02   |
| GAIF01002866.1 | 3.68    | 0.52   | 0.07    | 12.34  | 45.03  | 13.26  |
| GAIF01002867.1 | 38.97   | 30.6   | 0       | 52.56  | 26.02  | 10.45  |
| GAIF01002868.1 | 0       | 0      | 0       | 0.03   | 0.04   | 0      |
| GAIF01002870.1 | 0       | 0      | 0.26    | 0.76   | 4.35   | 0      |
| GAIF01002871.1 | 0.23    | 0      | 0       | 0      | 0.14   | 0      |
| GAIF01002872.1 | 0       | 0.07   | 0.07    | 0      | 0      | 0      |
| GAIF01002873.1 | 0       | 0.1    | 0       | 0      | 0.2    | 0      |
| GAIF01002874.1 | 0       | 0      | 0.2     | 0      | 0.02   | 0      |
| GAIF01002875.1 | 7.23    | 7.93   | 10.36   | 17.36  | 8.89   | 5.94   |
| GAIF01002876.1 | 13.51   | 12.94  | 37.79   | 25.84  | 14.82  | 15.18  |
| GAIF01002877.1 | 1.9     | 0.3    | 0.1     | 2      | 6.42   | 5.39   |
| GAIF01002879.1 | 13.97   | 10.81  | 7.62    | 41.68  | 53.91  | 11.27  |
| GAIF01002880.1 | 0       | 0      | 0.03    | 0      | 0      | 0      |
| GAIF01002882.1 | 1.68    | 2.99   | 7.45    | 2.08   | 2.03   | 0.96   |
| GAIF01002883.1 | 0.15    | 0.06   | 0.16    | 0.07   | 0.11   | 0.22   |
| GAIF01002884.1 | 0.17    | 0      | 0       | 0.19   | 0      | 0.37   |
| GAIF01002886.1 | 143.75  | 211.3  | 183.24  | 469.24 | 168.1  | 61.74  |
| GAIF01002887.1 | 0.14    | 0      | 0.02    | 1.38   | 7.45   | 0.13   |
| GAIF01002888.1 | 0       | 0      | 0       | 0      | 0      | 0.58   |
| GAIF01002889.1 | 0.65    | 0.8    | 0.09    | 0.19   | 0.29   | 0      |
| GAIF01002890.1 | 0       | 0      | 0       | 0      | 0.15   | 0      |
| GAIF01002892.1 | 10.87   | 9.92   | 18.8    | 4.44   | 4.27   | 9.33   |
| GAIF01002894.1 | 20.48   | 18.98  | 10.4    | 106.35 | 109.27 | 14.65  |
| GAIF01002896.1 | 2594.36 | 958.94 | 3077.01 | 614.49 | 74.55  | 446.19 |
| GAIF01002897.1 | 0       | 0.09   | 0       | 0      | 0      | 0      |
| GAIF01002898.1 | 8.8     | 15.61  | 19.97   | 25.38  | 10.4   | 6.42   |
| GAIF01002899.1 | 14.73   | 8.3    | 4.13    | 39.02  | 44.23  | 15.53  |
| GAIF01002900.1 | 0       | 0      | 0.73    | 0      | 0      | 0.15   |
| GAIF01002901.1 | 2.28    | 0.95   | 0.66    | 2.1    | 5.57   | 0.94   |
| GAIF01002902.1 | 0       | 0      | 0       | 0.98   | 3.45   | 0.09   |
| GAIF01002903.1 | 82.68   | 43.92  | 43.74   | 90.81  | 86.48  | 187.79 |
| GAIF01002904.1 | 50.11   | 10.52  | 1.13    | 119.96 | 384.37 | 5.39   |
| GAIF01002905.1 | 0       | 0      | 0       | 0      | 0.84   | 0.03   |
| GAIF01002907.1 | 1.44    | 1.08   | 0       | 8.66   | 25.94  | 0.5    |
| GAIF01002908.1 | 17.33   | 25.75  | 16.68   | 81.06  | 83.22  | 5.64   |
| GAIF01002909.1 | 0.6     | 0.84   | 0.47    | 1.01   | 1.1    | 0.4    |
| GAIF01002910.1 | 0       | 0      | 0.16    | 0      | 0      | 0      |
| GAIF01002913.1 | 0       | 0.07   | 0       | 0      | 0      | 0      |

|                |        |        |        |        |        |         |
|----------------|--------|--------|--------|--------|--------|---------|
| GAIF01002914.1 | 0.22   | 0.16   | 0.24   | 1.34   | 5.88   | 0       |
| GAIF01002916.1 | 0      | 0      | 0      | 0.1    | 0      | 45.43   |
| GAIF01002918.1 | 0      | 0      | 0      | 0.68   | 0.84   | 0.18    |
| GAIF01002919.1 | 0      | 0      | 0      | 0.7    | 4.25   | 0.09    |
| GAIF01002921.1 | 534.67 | 139.4  | 156.2  | 166.8  | 164.29 | 287.56  |
| GAIF01002922.1 | 0      | 0      | 0      | 1.23   | 3.81   | 0       |
| GAIF01002927.1 | 1.75   | 1.26   | 0.08   | 2.86   | 7.85   | 0.08    |
| GAIF01002928.1 | 4.01   | 0      | 0      | 8.26   | 26.32  | 1.67    |
| GAIF01002929.1 | 2.49   | 0.73   | 0.15   | 11.48  | 34.17  | 0.44    |
| GAIF01002930.1 | 0.17   | 0.04   | 0      | 0.39   | 2.13   | 0.06    |
| GAIF01002932.1 | 0.67   | 0.16   | 0.05   | 0.06   | 0.17   | 0.16    |
| GAIF01002935.1 | 0      | 0      | 0      | 0.22   | 0.8    | 0       |
| GAIF01002936.1 | 0.17   | 0.09   | 0.19   | 1.39   | 3.17   | 0       |
| GAIF01002937.1 | 2.95   | 2.85   | 1.62   | 8.24   | 7.91   | 1.47    |
| GAIF01002938.1 | 0.85   | 0.76   | 0.29   | 0.48   | 0.74   | 0.03    |
| GAIF01002939.1 | 0      | 0.02   | 0      | 0      | 0      | 0       |
| GAIF01002940.1 | 2.63   | 0      | 0.41   | 0.88   | 0.79   | 1.2     |
| GAIF01002942.1 | 73.47  | 122.59 | 75.43  | 206.84 | 121.92 | 45.47   |
| GAIF01002943.1 | 1.45   | 3.15   | 0.6    | 0.64   | 0.19   | 0       |
| GAIF01002944.1 | 0.16   | 0.09   | 0      | 0.1    | 0.4    | 0       |
| GAIF01002945.1 | 13.7   | 23.37  | 20.48  | 45.67  | 34.13  | 6.71    |
| GAIF01002946.1 | 0      | 0      | 0      | 0      | 0      | 0.09    |
| GAIF01002948.1 | 4.85   | 61.25  | 66.12  | 0      | 0      | 0       |
| GAIF01002949.1 | 0      | 0      | 0      | 0      | 0.18   | 0       |
| GAIF01002950.1 | 0.33   | 0      | 0      | 2.12   | 12.79  | 2.75    |
| GAIF01002952.1 | 53.34  | 45.52  | 39.69  | 57.43  | 64.83  | 34.22   |
| GAIF01002953.1 | 390.58 | 110.11 | 180.21 | 266.67 | 204.91 | 2597.57 |
| GAIF01002955.1 | 41.84  | 6.75   | 11.92  | 6.12   | 5.31   | 8.49    |
| GAIF01002956.1 | 0      | 0.01   | 0      | 0      | 0.04   | 0       |
| GAIF01002957.1 | 1.93   | 2.65   | 0.59   | 0.55   | 1.34   | 0.06    |
| GAIF01002958.1 | 0.3    | 0      | 0      | 0.18   | 0.18   | 0.33    |
| GAIF01002959.1 | 0.21   | 0.15   | 0.15   | 0.24   | 0      | 0       |
| GAIF01002960.1 | 7.41   | 6.6    | 12.05  | 7.94   | 1.09   | 5.21    |
| GAIF01002961.1 | 0      | 0.29   | 0.07   | 0.62   | 3.54   | 0.07    |
| GAIF01002962.1 | 0.26   | 0.1    | 0      | 2.46   | 10.34  | 0.26    |
| GAIF01002963.1 | 0      | 0.42   | 0.42   | 0.11   | 0.12   | 0.25    |
| GAIF01002964.1 | 10.68  | 14.54  | 6.3    | 6.44   | 8.58   | 0.63    |
| GAIF01002965.1 | 0      | 0      | 0      | 0      | 0.01   | 0       |
| GAIF01002966.1 | 0      | 0.23   | 0      | 0      | 0      | 0.17    |
| GAIF01002967.1 | 30.5   | 27.32  | 19.85  | 48.65  | 36.64  | 8.11    |
| GAIF01002968.1 | 11.07  | 15.37  | 19.39  | 20.67  | 11.3   | 9.78    |
| GAIF01002969.1 | 0      | 0.16   | 0.13   | 0.04   | 0      | 0.16    |
| GAIF01002970.1 | 17.27  | 15.86  | 9.54   | 101.08 | 132.04 | 10.81   |
| GAIF01002972.1 | 46.53  | 26.67  | 24.19  | 44.57  | 46.97  | 92.2    |



|                |        |        |        |        |       |       |
|----------------|--------|--------|--------|--------|-------|-------|
| GAIF01002973.1 | 0.98   | 0.32   | 0.32   | 1.82   | 4.7   | 0.11  |
| GAIF01002974.1 | 38.6   | 26.27  | 24.87  | 36.11  | 29.4  | 30.64 |
| GAIF01002975.1 | 3.78   | 1.28   | 1      | 1.81   | 0     | 0.72  |
| GAIF01002976.1 | 0      | 0      | 0      | 0      | 0.4   | 0     |
| GAIF01002978.1 | 0      | 0.07   | 0      | 0      | 0     | 0.07  |
| GAIF01002980.1 | 12.04  | 15.78  | 15.96  | 42.12  | 21.49 | 9.25  |
| GAIF01002981.1 | 3.76   | 1.49   | 1.72   | 10.49  | 24.38 | 16.79 |
| GAIF01002982.1 | 0      | 0      | 0.12   | 0      | 0     | 0     |
| GAIF01002983.1 | 0.05   | 0      | 0      | 0.33   | 2.17  | 0.05  |
| GAIF01002984.1 | 0.11   | 0.16   | 0.04   | 0.65   | 1.12  | 0     |
| GAIF01002985.1 | 8.03   | 6.67   | 4.49   | 11.69  | 13.48 | 1.09  |
| GAIF01002986.1 | 15.39  | 22.01  | 10.76  | 40.25  | 27.51 | 3.02  |
| GAIF01002987.1 | 0      | 0      | 0      | 0      | 0.09  | 0.16  |
| GAIF01002991.1 | 0      | 0      | 0      | 0.05   | 0.11  | 0.1   |
| GAIF01002992.1 | 13.83  | 31.03  | 9.85   | 22.03  | 27.78 | 3.57  |
| GAIF01002993.1 | 0.56   | 0      | 0      | 0      | 0     | 0     |
| GAIF01002994.1 | 0      | 0.14   | 0.14   | 0.15   | 0     | 0     |
| GAIF01002998.1 | 11.74  | 12.56  | 18.32  | 36.15  | 32.91 | 12.83 |
| GAIF01002999.1 | 56.55  | 40.71  | 41.21  | 82.06  | 75.27 | 13.28 |
| GAIF01003000.1 | 0.21   | 0      | 0      | 0      | 0     | 0     |
| GAIF01003002.1 | 281.41 | 145.47 | 139.63 | 222.92 | 138.4 | 54.09 |
| GAIF01003006.1 | 0.03   | 0      | 0      | 0      | 0.04  | 0     |
| GAIF01003007.1 | 1.39   | 2.59   | 0      | 2.54   | 14.33 | 7.66  |
| GAIF01003008.1 | 1.4    | 0.87   | 0.66   | 3.71   | 4.44  | 0.55  |
| GAIF01003010.1 | 79.64  | 25.6   | 67.52  | 121.29 | 79.69 | 16.28 |
| GAIF01003011.1 | 11.37  | 8.3    | 7.16   | 24.49  | 26.62 | 2.31  |
| GAIF01003013.1 | 20.91  | 16.14  | 34.07  | 88.86  | 37.99 | 71.74 |
| GAIF01003015.1 | 0      | 0      | 0.09   | 0      | 0.03  | 0     |
| GAIF01003016.1 | 0      | 0      | 0      | 0      | 0.17  | 0     |
| GAIF01003017.1 | 0.07   | 0      | 0      | 0.11   | 0.62  | 0     |
| GAIF01003018.1 | 0.16   | 0      | 0.12   | 1.48   | 7.6   | 0.59  |
| GAIF01003019.1 | 0      | 0      | 0      | 0.08   | 2.21  | 0     |
| GAIF01003020.1 | 1.89   | 0.73   | 0.05   | 6.65   | 19.53 | 0.63  |
| GAIF01003022.1 | 1.86   | 2.02   | 1.88   | 7.3    | 8.06  | 2.3   |
| GAIF01003023.1 | 2.7    | 1.52   | 0.21   | 3.1    | 2     | 0.16  |
| GAIF01003025.1 | 0.22   | 0.1    | 0.1    | 0.67   | 0.48  | 0.2   |
| GAIF01003026.1 | 2.09   | 3.35   | 2.78   | 17.33  | 39.67 | 0.66  |
| GAIF01003027.1 | 0      | 0      | 0.04   | 0      | 1.84  | 0.4   |
| GAIF01003028.1 | 0      | 0      | 0      | 0.35   | 0.37  | 0     |
| GAIF01003029.1 | 0      | 0      | 0      | 0.18   | 0.1   | 0     |
| GAIF01003031.1 | 0      | 0.91   | 0      | 0      | 0     | 0     |
| GAIF01003033.1 | 0      | 0      | 0      | 0.06   | 0.07  | 0     |
| GAIF01003034.1 | 5.4    | 4.6    | 4.39   | 16.3   | 14.25 | 3.45  |
| GAIF01003035.1 | 7.26   | 6.72   | 6.04   | 30.52  | 22.12 | 2.81  |

|                |         |         |         |         |         |         |
|----------------|---------|---------|---------|---------|---------|---------|
| GAIF01003036.1 | 0.86    | 0.41    | 0       | 1.23    | 1.52    | 1.46    |
| GAIF01003037.1 | 7.22    | 9.49    | 11.24   | 28.12   | 24.61   | 5.64    |
| GAIF01003040.1 | 6.58    | 8.04    | 2.19    | 3.69    | 3.25    | 0.89    |
| GAIF01003041.1 | 262.07  | 170.2   | 96.52   | 0       | 1.5     | 0.38    |
| GAIF01003042.1 | 0.18    | 0.14    | 0.04    | 1.09    | 2.53    | 0.02    |
| GAIF01003043.1 | 0.11    | 0       | 0.12    | 0.12    | 0       | 0       |
| GAIF01003045.1 | 3.97    | 4.88    | 7.54    | 14.09   | 10.91   | 4.11    |
| GAIF01003046.1 | 0.37    | 0       | 0.11    | 2.26    | 4.34    | 0.34    |
| GAIF01003047.1 | 0.04    | 0       | 0       | 0       | 0.06    | 0.04    |
| GAIF01003050.1 | 2.28    | 1.31    | 2.36    | 2.81    | 0.65    | 0.74    |
| GAIF01003051.1 | 0       | 0       | 0       | 0.12    | 0.13    | 0       |
| GAIF01003053.1 | 0.25    | 0.4     | 0.41    | 0       | 0.15    | 0       |
| GAIF01003054.1 | 8.91    | 13.99   | 7.91    | 37.68   | 29.11   | 1.69    |
| GAIF01003056.1 | 0.93    | 0.48    | 0.04    | 2.2     | 6.9     | 0.18    |
| GAIF01003058.1 | 9.72    | 6.08    | 6.87    | 25.94   | 35.98   | 8.79    |
| GAIF01003060.1 | 0.07    | 0       | 0       | 0.08    | 0.08    | 0       |
| GAIF01003061.1 | 0       | 0       | 0       | 0.09    | 0       | 0       |
| GAIF01003062.1 | 0       | 0       | 0       | 0       | 0.09    | 0       |
| GAIF01003063.1 | 0.44    | 0.47    | 0.16    | 0       | 0       | 0       |
| GAIF01003064.1 | 0.08    | 0       | 0       | 0       | 0       | 0       |
| GAIF01003065.1 | 0.49    | 0.28    | 0.18    | 0.34    | 0.28    | 0.04    |
| GAIF01003066.1 | 28.94   | 41.4    | 25.69   | 85.67   | 105.07  | 8.13    |
| GAIF01003067.1 | 1.11    | 177.33  | 396.59  | 6.66    | 31.56   | 34.99   |
| GAIF01003068.1 | 84.38   | 27.13   | 32.31   | 15.83   | 23.75   | 15.64   |
| GAIF01003069.1 | 0.59    | 0       | 0       | 1.28    | 8.36    | 0.19    |
| GAIF01003070.1 | 0.21    | 0       | 0       | 2.97    | 0       | 0       |
| GAIF01003071.1 | 64.95   | 85.2    | 91.88   | 102.54  | 77.54   | 21.17   |
| GAIF01003072.1 | 1.99    | 3.77    | 1.01    | 0.83    | 0.37    | 0.11    |
| GAIF01003073.1 | 0.85    | 1.18    | 0.42    | 0.36    | 0.46    | 0       |
| GAIF01003074.1 | 0.21    | 0       | 0       | 0.25    | 0.38    | 0.12    |
| GAIF01003075.1 | 151.02  | 70.36   | 69      | 169     | 126.57  | 631.76  |
| GAIF01003076.1 | 0       | 0       | 0.09    | 0.28    | 1.55    | 0       |
| GAIF01003079.1 | 1       | 1.04    | 0.68    | 3.54    | 4.01    | 0.47    |
| GAIF01003080.1 | 0.07    | 0       | 0       | 0       | 0       | 0       |
| GAIF01003081.1 | 5.81    | 3.97    | 3.74    | 7.36    | 13.79   | 1.58    |
| GAIF01003083.1 | 0.25    | 0.09    | 0.3     | 0.04    | 0.03    | 0.4     |
| GAIF01003084.1 | 3451.76 | 1958.33 | 1161.28 | 2413.92 | 2801.32 | 1728.09 |
| GAIF01003085.1 | 0       | 0.11    | 0       | 0       | 0       | 0       |
| GAIF01003086.1 | 6.84    | 2.89    | 2.79    | 25.67   | 63.91   | 41.81   |
| GAIF01003089.1 | 0.06    | 0.54    | 0.54    | 0       | 0.07    | 3.96    |
| GAIF01003091.1 | 12.33   | 20.45   | 22.29   | 69.02   | 35.8    | 11.95   |
| GAIF01003092.1 | 125.39  | 186.09  | 251.73  | 112.72  | 75.98   | 256.23  |
| GAIF01003094.1 | 0.19    | 0.04    | 0       | 0.54    | 8.37    | 0       |
| GAIF01003096.1 | 0.27    | 0       | 0       | 0.12    | 0       | 0       |

|                |        |        |        |        |        |         |
|----------------|--------|--------|--------|--------|--------|---------|
| GAIF01003097.1 | 0.09   | 0      | 0      | 0.04   | 0.01   | 0.16    |
| GAIF01003099.1 | 102.69 | 101.18 | 166.92 | 49.76  | 31.19  | 83.45   |
| GAIF01003100.1 | 11.12  | 7.49   | 14.57  | 24.92  | 21.74  | 30.86   |
| GAIF01003101.1 | 0.32   | 0.18   | 0.18   | 2.64   | 8.2    | 0.18    |
| GAIF01003102.1 | 0      | 0      | 0      | 1.92   | 5.14   | 0.1     |
| GAIF01003107.1 | 25.66  | 22.12  | 16.6   | 31.75  | 29.07  | 10.49   |
| GAIF01003109.1 | 79.45  | 27.64  | 45.31  | 115.89 | 2.56   | 10.24   |
| GAIF01003110.1 | 22.8   | 27.28  | 18.87  | 38.5   | 39.22  | 24.39   |
| GAIF01003112.1 | 6.24   | 1.2    | 2.72   | 4.69   | 6.04   | 5.75    |
| GAIF01003113.1 | 0.14   | 0      | 0.05   | 0.05   | 0.15   | 0.19    |
| GAIF01003118.1 | 0.72   | 0.26   | 0      | 7.42   | 31.94  | 1.6     |
| GAIF01003119.1 | 11.18  | 24.92  | 6.45   | 41.41  | 70.47  | 0.5     |
| GAIF01003120.1 | 0.02   | 0      | 0      | 0      | 0      | 0       |
| GAIF01003123.1 | 0.46   | 0.25   | 0.17   | 3.35   | 16.01  | 0.08    |
| GAIF01003124.1 | 23.72  | 29.6   | 13.52  | 2.87   | 0.91   | 0.55    |
| GAIF01003125.1 | 25.09  | 25.55  | 22.23  | 70.38  | 43.27  | 15.1    |
| GAIF01003128.1 | 408.7  | 183.74 | 171.91 | 575.77 | 597.86 | 128.98  |
| GAIF01003130.1 | 5.53   | 4.44   | 8.97   | 7.67   | 5.78   | 16.42   |
| GAIF01003131.1 | 0.52   | 2.08   | 0.53   | 6.87   | 38.42  | 1.47    |
| GAIF01003133.1 | 2.5    | 0.29   | 0      | 9.64   | 44.23  | 1.38    |
| GAIF01003135.1 | 0      | 0      | 0.06   | 0.07   | 0.27   | 0       |
| GAIF01003136.1 | 0      | 0      | 0      | 0      | 0.22   | 0       |
| GAIF01003137.1 | 0.3    | 0.16   | 0      | 0      | 0      | 0       |
| GAIF01003138.1 | 0      | 0      | 0      | 0      | 0.23   | 0       |
| GAIF01003140.1 | 26.7   | 13.2   | 1.03   | 6.58   | 4.84   | 12.58   |
| GAIF01003141.1 | 0      | 0      | 0      | 0.12   | 0      | 0       |
| GAIF01003142.1 | 0.09   | 0      | 0      | 0      | 0      | 0       |
| GAIF01003143.1 | 62.54  | 42.08  | 21.76  | 102.04 | 121.61 | 49.05   |
| GAIF01003145.1 | 42.24  | 42.19  | 25.56  | 208.58 | 201.36 | 19.45   |
| GAIF01003146.1 | 34.97  | 47.06  | 23.54  | 315.61 | 196.09 | 17.59   |
| GAIF01003147.1 | 992.21 | 312.78 | 295.83 | 409.47 | 421.94 | 2087.88 |
| GAIF01003148.1 | 3.82   | 8.5    | 5.48   | 8.49   | 4.8    | 0.18    |
| GAIF01003149.1 | 0.17   | 0      | 0      | 0.58   | 2.5    | 0.27    |
| GAIF01003150.1 | 33.47  | 43.17  | 57.55  | 49.4   | 30.05  | 28.55   |
| GAIF01003151.1 | 0      | 0      | 0      | 0      | 0.14   | 1.08    |
| GAIF01003152.1 | 0.08   | 0.13   | 0.08   | 4.86   | 16.54  | 0.17    |
| GAIF01003153.1 | 0.14   | 0.1    | 0.1    | 0.89   | 0.87   | 0.1     |
| GAIF01003154.1 | 33.04  | 12.03  | 26.47  | 39.15  | 16.94  | 13.02   |
| GAIF01003156.1 | 137.73 | 35.64  | 54.91  | 33.51  | 16.97  | 83.74   |
| GAIF01003157.1 | 297.34 | 111.84 | 131.83 | 68.08  | 50.14  | 104.43  |
| GAIF01003158.1 | 4.29   | 5.32   | 2.29   | 33.61  | 41.52  | 1.68    |
| GAIF01003159.1 | 3.58   | 5.96   | 4.56   | 18.07  | 17.23  | 2.51    |
| GAIF01003161.1 | 0.2    | 0.16   | 0.05   | 1.32   | 9.11   | 0.05    |
| GAIF01003162.1 | 0.03   | 0.03   | 0      | 0.28   | 0      | 0       |

|                |         |       |        |        |        |        |
|----------------|---------|-------|--------|--------|--------|--------|
| GAIF01003164.1 | 0.82    | 0.64  | 0      | 5.59   | 2.83   | 0.65   |
| GAIF01003165.1 | 15.06   | 10.8  | 9.13   | 34.13  | 33.05  | 8.55   |
| GAIF01003166.1 | 1.75    | 0     | 0      | 1.85   | 8.84   | 0.59   |
| GAIF01003169.1 | 0.11    | 0.12  | 0      | 0.13   | 0.65   | 0      |
| GAIF01003170.1 | 0.21    | 0.1   | 0.1    | 2.22   | 8.17   | 0.05   |
| GAIF01003172.1 | 0       | 0     | 0      | 0      | 0.15   | 0      |
| GAIF01003173.1 | 1.21    | 2.27  | 1.33   | 0.78   | 0.32   | 0      |
| GAIF01003174.1 | 4.53    | 8.15  | 11.38  | 24.79  | 21.41  | 5.51   |
| GAIF01003175.1 | 0       | 0.08  | 0      | 0.17   | 0      | 0      |
| GAIF01003177.1 | 4.06    | 3.04  | 3.64   | 4.13   | 3.39   | 2.15   |
| GAIF01003178.1 | 0       | 0     | 0.15   | 0      | 0      | 0      |
| GAIF01003179.1 | 20.01   | 22.32 | 30.32  | 32.02  | 28.64  | 5.18   |
| GAIF01003180.1 | 4.84    | 7.27  | 7.85   | 1.58   | 2.57   | 2.59   |
| GAIF01003182.1 | 0.96    | 0.5   | 0      | 0.37   | 0.6    | 0.36   |
| GAIF01003184.1 | 18.01   | 13.8  | 18.52  | 15.69  | 38.69  | 4.33   |
| GAIF01003188.1 | 0       | 0     | 0      | 0      | 0.06   | 0.05   |
| GAIF01003189.1 | 4.09    | 3.45  | 0.87   | 13.09  | 25.05  | 22.13  |
| GAIF01003190.1 | 0       | 2.41  | 0.35   | 0.59   | 1.09   | 0      |
| GAIF01003191.1 | 1022.03 | 615.6 | 886.18 | 840.88 | 705.95 | 1203.8 |
| GAIF01003192.1 | 0       | 0     | 0      | 0      | 0.04   | 0      |
| GAIF01003195.1 | 0       | 0     | 0      | 0      | 0      | 0.48   |
| GAIF01003196.1 | 0.29    | 0.47  | 0.95   | 0      | 0      | 0      |
| GAIF01003198.1 | 0.18    | 0.05  | 0      | 0.36   | 1.85   | 0.05   |
| GAIF01003199.1 | 8.72    | 11.38 | 6.3    | 38.15  | 46.84  | 2.97   |
| GAIF01003201.1 | 0.62    | 1.76  | 0.39   | 8.28   | 3.12   | 0.7    |
| GAIF01003203.1 | 209.57  | 330.7 | 681.57 | 220.21 | 189.53 | 257.36 |
| GAIF01003206.1 | 0       | 0     | 0      | 0.45   | 0.19   | 0.19   |
| GAIF01003207.1 | 0.27    | 0     | 0.1    | 0.15   | 0.13   | 0      |
| GAIF01003209.1 | 0.08    | 0     | 0      | 0      | 0.2    | 0      |
| GAIF01003210.1 | 0       | 0     | 0      | 0      | 0      | 8.8    |
| GAIF01003213.1 | 0.24    | 0.09  | 0.03   | 0.35   | 0.62   | 0.2    |
| GAIF01003214.1 | 0.95    | 0.36  | 0.41   | 4.31   | 17.67  | 7.64   |
| GAIF01003215.1 | 6.97    | 4.93  | 5.87   | 3.24   | 0.98   | 1.28   |
| GAIF01003216.1 | 32.97   | 33.42 | 20.52  | 55.04  | 45.32  | 13.35  |
| GAIF01003217.1 | 3.13    | 1.31  | 1.33   | 0      | 0      | 0      |
| GAIF01003222.1 | 0.23    | 0     | 0      | 2.72   | 1.31   | 0      |
| GAIF01003223.1 | 20.63   | 11.16 | 23.93  | 23.26  | 16.75  | 39.78  |
| GAIF01003224.1 | 5.94    | 23.88 | 6.73   | 35.9   | 10.74  | 0      |
| GAIF01003225.1 | 9.61    | 10.06 | 6.04   | 30.68  | 36.48  | 1.78   |
| GAIF01003226.1 | 2.26    | 3.62  | 1.61   | 1.04   | 2.39   | 0.64   |
| GAIF01003227.1 | 0       | 0     | 0      | 0      | 0.12   | 0      |
| GAIF01003228.1 | 0       | 0     | 0.03   | 0      | 0      | 0      |
| GAIF01003229.1 | 0.44    | 0.6   | 0.24   | 0.9    | 1.07   | 0      |
| GAIF01003231.1 | 18.6    | 33.69 | 8.72   | 41.6   | 47.01  | 1.75   |

|                |        |        |        |        |        |       |
|----------------|--------|--------|--------|--------|--------|-------|
| GAIF01003233.1 | 0      | 0.12   | 0.12   | 0.21   | 1.45   | 0.55  |
| GAIF01003235.1 | 0.14   | 0.53   | 0.57   | 0      | 0      | 0     |
| GAIF01003236.1 | 4.21   | 2.13   | 0.43   | 6.45   | 12.48  | 0.38  |
| GAIF01003239.1 | 0      | 0.02   | 0      | 0.15   | 0.09   | 0     |
| GAIF01003241.1 | 0      | 0.42   | 0.17   | 0      | 0      | 0     |
| GAIF01003244.1 | 1.14   | 1.39   | 1.01   | 2.97   | 1.62   | 0.47  |
| GAIF01003247.1 | 5.98   | 5.38   | 7.01   | 12.12  | 9.25   | 21.12 |
| GAIF01003248.1 | 4.68   | 5.19   | 3.18   | 11.95  | 13.73  | 0.82  |
| GAIF01003250.1 | 0      | 0      | 0      | 0.84   | 0.56   | 0     |
| GAIF01003252.1 | 0.1    | 0.05   | 0.05   | 1.25   | 4.87   | 0.05  |
| GAIF01003257.1 | 14.62  | 16.16  | 4.63   | 28.09  | 35.38  | 1.6   |
| GAIF01003259.1 | 162.28 | 81.73  | 46.95  | 231.58 | 317.17 | 38.19 |
| GAIF01003260.1 | 0      | 0.04   | 0      | 0      | 0      | 0.1   |
| GAIF01003261.1 | 0.9    | 0.19   | 0.79   | 1.04   | 2.37   | 0.4   |
| GAIF01003262.1 | 0.1    | 0      | 0      | 0      | 0      | 0     |
| GAIF01003265.1 | 0.04   | 0.27   | 0      | 0.04   | 0      | 0     |
| GAIF01003266.1 | 0      | 0      | 0.1    | 0      | 0.14   | 0.1   |
| GAIF01003267.1 | 0      | 0      | 0      | 0      | 0.42   | 0     |
| GAIF01003268.1 | 7.86   | 5.79   | 7.52   | 19.42  | 15.65  | 5.87  |
| GAIF01003270.1 | 610.12 | 276.66 | 278.85 | 435.21 | 321.08 | 73.65 |
| GAIF01003271.1 | 0.47   | 0.1    | 0.47   | 1.49   | 0.57   | 0.42  |
| GAIF01003272.1 | 0      | 0      | 0.07   | 0      | 0.17   | 0     |
| GAIF01003273.1 | 0.05   | 0.06   | 0.11   | 1.07   | 4.48   | 0.17  |
| GAIF01003274.1 | 30.86  | 19.72  | 25.31  | 54.57  | 38.4   | 72.45 |
| GAIF01003275.1 | 2.36   | 1.45   | 0      | 1.99   | 1.39   | 0.8   |
| GAIF01003276.1 | 1.94   | 2.09   | 2.45   | 8.59   | 4.5    | 0.74  |
| GAIF01003278.1 | 29.6   | 4.59   | 2.08   | 11.34  | 5.64   | 5.66  |
| GAIF01003279.1 | 1.24   | 55.31  | 26.68  | 10.02  | 108.69 | 37.26 |
| GAIF01003280.1 | 0      | 0.09   | 1.24   | 0      | 0      | 0     |
| GAIF01003281.1 | 1.88   | 0      | 0.28   | 1.9    | 0.91   | 3.74  |
| GAIF01003282.1 | 22.5   | 19.48  | 24.7   | 37.48  | 34.45  | 22.04 |
| GAIF01003286.1 | 0.11   | 0      | 0.37   | 0      | 0      | 0     |
| GAIF01003288.1 | 1.4    | 0.38   | 0      | 1.49   | 1.78   | 0     |
| GAIF01003291.1 | 21.01  | 29.69  | 10.48  | 77.19  | 97.29  | 0.6   |
| GAIF01003295.1 | 39.49  | 35.85  | 17.79  | 60.04  | 63.36  | 8.5   |
| GAIF01003297.1 | 1.99   | 0.43   | 0.38   | 0.75   | 1.61   | 1.1   |
| GAIF01003299.1 | 0      | 0      | 0      | 0.18   | 0.15   | 0     |
| GAIF01003302.1 | 0      | 0      | 0      | 0.1    | 0.21   | 0     |
| GAIF01003304.1 | 0.14   | 95.23  | 28.87  | 0      | 0.45   | 0     |
| GAIF01003305.1 | 0.01   | 0.12   | 0      | 0.15   | 1.37   | 0     |
| GAIF01003309.1 | 20.45  | 25.14  | 31.28  | 48.19  | 32.78  | 12.74 |
| GAIF01003310.1 | 0.03   | 0      | 0      | 0.43   | 1.02   | 0.06  |
| GAIF01003311.1 | 88.44  | 39     | 7.54   | 79.21  | 53.97  | 5.03  |
| GAIF01003312.1 | 1.31   | 2.55   | 1.52   | 1.12   | 1.08   | 1.52  |

|                |         |          |          |        |        |        |
|----------------|---------|----------|----------|--------|--------|--------|
| GAIF01003313.1 | 0.73    | 0.11     | 0.34     | 3.14   | 5.88   | 5.84   |
| GAIF01003314.1 | 6120.29 | 24692.38 | 20679.25 | 243.48 | 604.67 | 924.15 |
| GAIF01003315.1 | 0       | 0        | 0        | 0.21   | 1.04   | 0.05   |
| GAIF01003317.1 | 1.73    | 0.18     | 0        | 6.39   | 26.08  | 0.54   |
| GAIF01003318.1 | 0.28    | 0.35     | 0.12     | 3.03   | 7.59   | 0.31   |
| GAIF01003319.1 | 0       | 0        | 0        | 0      | 3.89   | 0.58   |
| GAIF01003321.1 | 1.06    | 0.29     | 0.1      | 1.23   | 1.91   | 0.1    |
| GAIF01003322.1 | 0       | 0        | 0        | 0.91   | 0.97   | 0      |
| GAIF01003325.1 | 0       | 0        | 0        | 0.11   | 0      | 0      |
| GAIF01003326.1 | 0.23    | 0        | 0        | 1.49   | 4.49   | 0.13   |
| GAIF01003328.1 | 100.11  | 114.03   | 46.74    | 93.15  | 75.21  | 33.77  |
| GAIF01003329.1 | 0.05    | 0        | 0        | 0      | 0.74   | 0      |
| GAIF01003330.1 | 64.51   | 95.88    | 121.08   | 59.72  | 47.73  | 34.57  |
| GAIF01003331.1 | 0       | 0        | 0        | 0      | 0.2    | 0      |
| GAIF01003332.1 | 1.12    | 0.6      | 0.33     | 8.76   | 0.37   | 0.29   |
| GAIF01003333.1 | 1.23    | 0.73     | 0.45     | 1.36   | 0.61   | 0.34   |
| GAIF01003334.1 | 0       | 1.05     | 2.24     | 0      | 0      | 0.66   |
| GAIF01003335.1 | 204.57  | 111.07   | 85.65    | 58.28  | 37.71  | 20.48  |
| GAIF01003336.1 | 0       | 0        | 0        | 0.06   | 0.48   | 0      |
| GAIF01003337.1 | 0       | 0        | 0        | 0.11   | 0.23   | 0.11   |
| GAIF01003338.1 | 0.24    | 0.7      | 0.09     | 0.74   | 1.22   | 0.18   |
| GAIF01003339.1 | 43.89   | 20.57    | 16.92    | 93.3   | 65.77  | 15.36  |
| GAIF01003340.1 | 2.78    | 1.73     | 2.39     | 8.22   | 11.34  | 0      |
| GAIF01003342.1 | 3.25    | 1.09     | 1.26     | 3.48   | 5.11   | 0.38   |
| GAIF01003343.1 | 0.26    | 0.25     | 0.69     | 0.85   | 0.7    | 0.9    |
| GAIF01003345.1 | 33.74   | 18.78    | 22.29    | 45.75  | 41.55  | 9.31   |
| GAIF01003346.1 | 0       | 0.19     | 0        | 0.41   | 1.06   | 0      |
| GAIF01003347.1 | 1.97    | 0        | 1.83     | 1.76   | 1.64   | 3      |
| GAIF01003348.1 | 9.25    | 13.56    | 9.07     | 17.18  | 19.24  | 2.23   |
| GAIF01003349.1 | 27.16   | 21.16    | 17.7     | 49.64  | 40.73  | 7.77   |
| GAIF01003351.1 | 5.19    | 4.73     | 2.65     | 3.26   | 2.48   | 1.8    |
| GAIF01003354.1 | 56.97   | 69.49    | 40.82    | 32.32  | 20.96  | 29.71  |
| GAIF01003355.1 | 0       | 0.24     | 0        | 0.07   | 0.11   | 0.05   |
| GAIF01003356.1 | 0.01    | 0.04     | 0        | 0      | 0.06   | 0      |
| GAIF01003357.1 | 17.95   | 8.16     | 10.9     | 8.51   | 3.68   | 6.24   |
| GAIF01003359.1 | 8.87    | 7.22     | 7.91     | 29.86  | 40.05  | 3.59   |
| GAIF01003360.1 | 0       | 0.94     | 0.66     | 0.15   | 0.8    | 0.07   |
| GAIF01003361.1 | 0       | 0        | 0.1      | 0.16   | 0.56   | 0.05   |
| GAIF01003362.1 | 44.38   | 80.59    | 82.26    | 13.51  | 5.68   | 19.61  |
| GAIF01003363.1 | 0       | 0.13     | 0.54     | 0      | 0      | 0      |
| GAIF01003364.1 | 0.28    | 0        | 0.15     | 1.78   | 6.55   | 0      |
| GAIF01003366.1 | 12.12   | 4.82     | 13.72    | 35.28  | 73.88  | 155.76 |
| GAIF01003367.1 | 0.54    | 0        | 0.19     | 0.8    | 0      | 0.48   |
| GAIF01003372.1 | 191.48  | 110.85   | 54.59    | 203.16 | 187.78 | 115.26 |

|                |       |       |       |       |       |       |
|----------------|-------|-------|-------|-------|-------|-------|
| GAIF01003373.1 | 11    | 11.48 | 8.34  | 28.95 | 19.1  | 6.8   |
| GAIF01003374.1 | 2.37  | 0     | 0     | 2.68  | 8.4   | 0     |
| GAIF01003377.1 | 0     | 0     | 0     | 0     | 0.15  | 0.27  |
| GAIF01003378.1 | 0     | 0.11  | 0     | 0     | 0     | 0     |
| GAIF01003379.1 | 0     | 0     | 0     | 0.26  | 0.27  | 0     |
| GAIF01003380.1 | 0.09  | 0     | 0     | 0.21  | 4.08  | 0.1   |
| GAIF01003381.1 | 1.49  | 2.5   | 0.69  | 1.34  | 2.06  | 0.25  |
| GAIF01003382.1 | 0.22  | 0     | 0     | 0.77  | 1.42  | 0     |
| GAIF01003385.1 | 0.97  | 0.47  | 0.99  | 0.38  | 0.22  | 0.08  |
| GAIF01003386.1 | 0     | 0     | 0     | 0     | 0.5   | 0     |
| GAIF01003388.1 | 0     | 0     | 0.09  | 0     | 0     | 0.23  |
| GAIF01003390.1 | 6.23  | 11.17 | 6.54  | 21.7  | 23.73 | 3.55  |
| GAIF01003391.1 | 10.69 | 12.19 | 2.42  | 48.73 | 46.05 | 1.21  |
| GAIF01003392.1 | 41.75 | 37.46 | 30.06 | 73.7  | 62.78 | 19.32 |
| GAIF01003395.1 | 0     | 0.15  | 0     | 0.47  | 3.72  | 0.3   |
| GAIF01003396.1 | 0.46  | 0.41  | 0     | 0.54  | 4.85  | 0.22  |
| GAIF01003397.1 | 0     | 0     | 0     | 0     | 0.54  | 0     |
| GAIF01003398.1 | 0.11  | 0     | 0     | 0.26  | 1.15  | 0.06  |
| GAIF01003399.1 | 0.14  | 0.6   | 0     | 0.17  | 1.3   | 0.44  |
| GAIF01003400.1 | 2.19  | 4.77  | 4.37  | 6.2   | 3.69  | 2.85  |
| GAIF01003401.1 | 0.17  | 0.04  | 0.09  | 0.34  | 2.53  | 2.27  |
| GAIF01003403.1 | 0.06  | 0     | 0     | 0     | 0.46  | 0     |
| GAIF01003406.1 | 4.07  | 2.71  | 1.01  | 4.42  | 2.68  | 0.87  |
| GAIF01003407.1 | 0     | 0     | 0     | 0.14  | 0.44  | 0     |
| GAIF01003408.1 | 3.07  | 3.95  | 6.08  | 8.22  | 17.58 | 2.31  |
| GAIF01003409.1 | 0     | 0     | 0     | 0     | 0     | 0.29  |
| GAIF01003410.1 | 0     | 0     | 0     | 0.12  | 0.37  | 0     |
| GAIF01003411.1 | 21.6  | 18.8  | 13.58 | 44.3  | 27.89 | 7.84  |
| GAIF01003412.1 | 0     | 0     | 0     | 0.09  | 0     | 0     |
| GAIF01003413.1 | 0     | 0     | 0.2   | 0     | 0     | 0     |
| GAIF01003415.1 | 0     | 0     | 0     | 0     | 0     | 0.53  |
| GAIF01003416.1 | 40.95 | 12.62 | 14.01 | 4.58  | 1.55  | 0.99  |
| GAIF01003418.1 | 0     | 0     | 0     | 0     | 0.3   | 0     |
| GAIF01003420.1 | 1.21  | 0.74  | 0.83  | 8.88  | 68.62 | 2.18  |
| GAIF01003421.1 | 0     | 0     | 0     | 0.1   | 0.1   | 0     |
| GAIF01003422.1 | 14.06 | 10.53 | 13.22 | 24.44 | 22.11 | 14.84 |
| GAIF01003423.1 | 0.14  | 0     | 0     | 0.5   | 2.09  | 0     |
| GAIF01003424.1 | 5.51  | 6.55  | 7.3   | 7.98  | 4.03  | 2.57  |
| GAIF01003425.1 | 17.39 | 18.36 | 15.56 | 40.32 | 20.25 | 5.18  |
| GAIF01003426.1 | 0.52  | 0.1   | 0.2   | 1.75  | 7.01  | 0.85  |
| GAIF01003427.1 | 0.97  | 0.3   | 0.15  | 3     | 6.04  | 0.1   |
| GAIF01003428.1 | 0     | 0     | 0     | 0.13  | 0.22  | 0     |
| GAIF01003429.1 | 0.49  | 0.31  | 0.33  | 0.69  | 0.31  | 0     |
| GAIF01003430.1 | 3.37  | 1.9   | 0.51  | 7.18  | 16.43 | 15.66 |

|                |        |        |       |       |        |       |
|----------------|--------|--------|-------|-------|--------|-------|
| GAIF01003432.1 | 30.15  | 30.29  | 36.86 | 5.79  | 3.88   | 4.7   |
| GAIF01003433.1 | 6.08   | 4.76   | 1.9   | 1.45  | 5.23   | 0.49  |
| GAIF01003434.1 | 0      | 0      | 0.1   | 0     | 0.22   | 0     |
| GAIF01003438.1 | 0.17   | 0.09   | 0     | 0.2   | 0.93   | 0.09  |
| GAIF01003441.1 | 12.65  | 16.23  | 16.93 | 34.7  | 25.96  | 10.04 |
| GAIF01003442.1 | 0.09   | 0.03   | 0.06  | 0.74  | 5.39   | 0.48  |
| GAIF01003443.1 | 7.89   | 11.37  | 11.24 | 25.42 | 15.14  | 3.06  |
| GAIF01003444.1 | 0      | 0      | 0     | 0     | 0.33   | 0     |
| GAIF01003445.1 | 30.21  | 8.16   | 7.75  | 20.04 | 9.84   | 16.35 |
| GAIF01003446.1 | 19.12  | 23.02  | 15.14 | 53.22 | 45.1   | 6.13  |
| GAIF01003449.1 | 0.09   | 0      | 0     | 0     | 0      | 0     |
| GAIF01003450.1 | 0      | 0      | 0     | 0     | 4.48   | 0     |
| GAIF01003451.1 | 0      | 0.08   | 0     | 0.08  | 0.12   | 0     |
| GAIF01003453.1 | 0      | 0      | 0     | 0     | 0.58   | 0     |
| GAIF01003454.1 | 0.31   | 0      | 0     | 0     | 0      | 0     |
| GAIF01003455.1 | 207.72 | 121.25 | 52.23 | 65.19 | 84.82  | 27.28 |
| GAIF01003456.1 | 0.11   | 0      | 0     | 0     | 0      | 0.28  |
| GAIF01003457.1 | 0      | 0      | 0     | 0.25  | 0.12   | 0     |
| GAIF01003459.1 | 0      | 0      | 0     | 0     | 0.13   | 0     |
| GAIF01003460.1 | 0.04   | 0      | 0     | 0.58  | 0      | 0     |
| GAIF01003461.1 | 0      | 0.17   | 0.35  | 0     | 0      | 0.96  |
| GAIF01003463.1 | 8.69   | 14.46  | 7.6   | 8.43  | 8.2    | 0.5   |
| GAIF01003464.1 | 0.4    | 0.7    | 0     | 2.79  | 4.44   | 0.18  |
| GAIF01003465.1 | 14.44  | 16.71  | 12.86 | 47.99 | 134.02 | 28.77 |
| GAIF01003466.1 | 0      | 0      | 0.08  | 0     | 0      | 0     |
| GAIF01003467.1 | 14     | 17.99  | 22.18 | 29.95 | 15.99  | 9.34  |
| GAIF01003469.1 | 10.3   | 7.75   | 8.2   | 26.07 | 56.4   | 26.53 |
| GAIF01003470.1 | 158.15 | 20.99  | 9.39  | 95.24 | 150.46 | 11.12 |
| GAIF01003472.1 | 27.92  | 15.97  | 8.82  | 82.31 | 118.16 | 12.47 |
| GAIF01003473.1 | 19.37  | 11.7   | 5.18  | 41.05 | 52.69  | 12.63 |
| GAIF01003474.1 | 4.09   | 3.01   | 5.37  | 2.33  | 0.37   | 6.05  |
| GAIF01003475.1 | 0.25   | 0      | 0.05  | 0.73  | 3.29   | 0.28  |
| GAIF01003476.1 | 0      | 0      | 0.11  | 0.12  | 0.12   | 0.13  |
| GAIF01003477.1 | 1.37   | 0      | 0     | 0.89  | 1.34   | 0     |
| GAIF01003478.1 | 0.3    | 0.16   | 0     | 0.53  | 1.27   | 0     |
| GAIF01003479.1 | 1.24   | 0.23   | 0     | 4.17  | 12.14  | 1.31  |
| GAIF01003480.1 | 26.73  | 10.21  | 6.88  | 9.12  | 24.59  | 6.99  |
| GAIF01003481.1 | 0      | 0.31   | 0.08  | 0     | 0      | 0.08  |
| GAIF01003482.1 | 0.92   | 0.26   | 0.13  | 1.96  | 14.12  | 0     |
| GAIF01003484.1 | 34.84  | 82.14  | 27.56 | 96.57 | 160.9  | 12.58 |
| GAIF01003485.1 | 0      | 0      | 0     | 0.14  | 1.72   | 0     |
| GAIF01003486.1 | 17.13  | 14.06  | 3.62  | 7.17  | 27.05  | 15.65 |
| GAIF01003487.1 | 0      | 0      | 0     | 0.29  | 0.74   | 0     |
| GAIF01003489.1 | 0      | 0      | 0     | 0.62  | 3.43   | 0.44  |



|                |       |       |       |        |       |       |
|----------------|-------|-------|-------|--------|-------|-------|
| GAIF01003490.1 | 0     | 0.05  | 0     | 0      | 0     | 0     |
| GAIF01003491.1 | 0.73  | 0.64  | 0.96  | 1.02   | 0.18  | 0     |
| GAIF01003492.1 | 1.05  | 0.38  | 0.13  | 4.59   | 23.1  | 0.26  |
| GAIF01003493.1 | 0     | 0     | 0.01  | 0.13   | 2.38  | 0     |
| GAIF01003494.1 | 0     | 0     | 0     | 0      | 0.15  | 0.05  |
| GAIF01003495.1 | 1.83  | 2.91  | 0.15  | 7.19   | 10.84 | 0.16  |
| GAIF01003496.1 | 0.3   | 0.11  | 0.22  | 1.15   | 0.18  | 0     |
| GAIF01003497.1 | 4.86  | 3.77  | 0.69  | 6.04   | 11.44 | 0.69  |
| GAIF01003498.1 | 0     | 0     | 0     | 0.07   | 0.14  | 0.59  |
| GAIF01003499.1 | 3.27  | 6.08  | 2.43  | 18.35  | 14.72 | 1.33  |
| GAIF01003500.1 | 48.51 | 70.81 | 55.28 | 110.18 | 62.54 | 12.89 |
| GAIF01003501.1 | 0.5   | 0.72  | 1.16  | 0.81   | 0.32  | 1.2   |
| GAIF01003503.1 | 36.54 | 45.68 | 70.33 | 56.06  | 54.59 | 28.72 |
| GAIF01003504.1 | 0     | 0     | 0     | 0      | 0.08  | 0.07  |
| GAIF01003505.1 | 0.26  | 0     | 0     | 0.95   | 1.11  | 0     |
| GAIF01003506.1 | 0.11  | 0     | 0     | 0.98   | 1.66  | 0.25  |
| GAIF01003507.1 | 3.89  | 3     | 1.09  | 15.18  | 44.59 | 1.39  |
| GAIF01003508.1 | 0.08  | 0     | 0     | 0.19   | 0.84  | 0.05  |
| GAIF01003509.1 | 7.21  | 8.85  | 5.7   | 34.9   | 33.71 | 2.26  |
| GAIF01003510.1 | 0     | 0     | 0     | 0.12   | 0.87  | 0     |
| GAIF01003511.1 | 0     | 0     | 0.05  | 0      | 0.05  | 0     |
| GAIF01003512.1 | 23.72 | 14.18 | 21.84 | 44.29  | 67.27 | 36.94 |
| GAIF01003513.1 | 23.72 | 15.75 | 19.49 | 20.22  | 10.84 | 13.35 |
| GAIF01003514.1 | 0     | 0     | 0     | 0.56   | 0.14  | 0     |
| GAIF01003515.1 | 50.87 | 49.73 | 37.99 | 116.11 | 83.11 | 16.7  |
| GAIF01003516.1 | 28.93 | 53.34 | 19.31 | 71.07  | 78.56 | 6.4   |
| GAIF01003517.1 | 0.91  | 1.28  | 0.72  | 0.3    | 0     | 0     |
| GAIF01003518.1 | 0     | 0.66  | 0     | 0      | 0     | 0     |
| GAIF01003521.1 | 0     | 0     | 0     | 0      | 0.06  | 0     |
| GAIF01003522.1 | 0.12  | 0.37  | 0.07  | 0.9    | 3.38  | 0.48  |
| GAIF01003523.1 | 54.23 | 20.76 | 29.88 | 61.14  | 55.99 | 87.17 |
| GAIF01003524.1 | 0.87  | 0.16  | 0     | 2.8    | 18.29 | 0.43  |
| GAIF01003525.1 | 0.23  | 0.1   | 0     | 0.05   | 1.96  | 0     |
| GAIF01003526.1 | 0.86  | 0     | 7.96  | 4.97   | 0     | 4.61  |
| GAIF01003527.1 | 44.13 | 47.69 | 12.15 | 60.77  | 52.03 | 2.75  |
| GAIF01003528.1 | 0.17  | 0.04  | 0.06  | 1.17   | 5.98  | 0.9   |
| GAIF01003529.1 | 0.57  | 0.21  | 0.62  | 0      | 0     | 0.21  |
| GAIF01003532.1 | 0     | 0.49  | 0.06  | 0      | 0     | 0     |
| GAIF01003534.1 | 7.56  | 6.65  | 5.12  | 22.8   | 27.03 | 1.39  |
| GAIF01003537.1 | 0     | 0.27  | 0.27  | 0.1    | 0     | 0.55  |
| GAIF01003538.1 | 2.47  | 0     | 0     | 2.34   | 1.4   | 0.73  |
| GAIF01003539.1 | 0     | 0.13  | 0.09  | 0      | 0     | 0     |
| GAIF01003540.1 | 0     | 0     | 0     | 0      | 0.09  | 0     |
| GAIF01003541.1 | 0     | 0     | 0     | 0      | 0.4   | 0     |

|                |         |        |        |         |        |        |
|----------------|---------|--------|--------|---------|--------|--------|
| GAIF01003542.1 | 0.04    | 0      | 0      | 0       | 0.05   | 0      |
| GAIF01003543.1 | 2.25    | 2.74   | 2.1    | 2.93    | 1.89   | 0.45   |
| GAIF01003547.1 | 1.57    | 1.6    | 0.4    | 3.86    | 6.92   | 1.31   |
| GAIF01003549.1 | 0       | 0      | 0      | 0.1     | 0.11   | 0      |
| GAIF01003550.1 | 0.03    | 0.04   | 0      | 0       | 0      | 0      |
| GAIF01003552.1 | 0       | 0      | 0.29   | 0       | 0      | 0      |
| GAIF01003553.1 | 2.49    | 1.93   | 3.52   | 7.43    | 5.14   | 0.39   |
| GAIF01003555.1 | 0.83    | 0      | 0.46   | 0.24    | 0.25   | 0      |
| GAIF01003556.1 | 6.14    | 4.08   | 0.56   | 4.75    | 4.72   | 3.01   |
| GAIF01003557.1 | 6.47    | 11.91  | 9.74   | 11.72   | 11.5   | 2.59   |
| GAIF01003560.1 | 0       | 0      | 0      | 0.06    | 0.12   | 0      |
| GAIF01003561.1 | 55.46   | 123.54 | 171.79 | 48.52   | 63.33  | 173.09 |
| GAIF01003562.1 | 0.16    | 0.09   | 0      | 1.32    | 7.82   | 0.18   |
| GAIF01003563.1 | 0.74    | 1.09   | 0.66   | 0.55    | 0.24   | 0.3    |
| GAIF01003565.1 | 324.23  | 267.37 | 248.16 | 214.56  | 145.43 | 370.2  |
| GAIF01003567.1 | 0.09    | 0      | 0      | 0       | 0.31   | 0.28   |
| GAIF01003569.1 | 2.68    | 3      | 2.86   | 2.47    | 0.95   | 0.17   |
| GAIF01003570.1 | 0.08    | 0      | 0      | 0.09    | 0.52   | 0      |
| GAIF01003571.1 | 202.85  | 153.2  | 111.34 | 120.09  | 165.48 | 57.54  |
| GAIF01003574.1 | 0.56    | 0.51   | 0.38   | 1.82    | 2.89   | 0.38   |
| GAIF01003575.1 | 1030.19 | 72.99  | 191.51 | 1492.18 | 250.31 | 222.28 |
| GAIF01003576.1 | 3.79    | 5.84   | 3.9    | 14.68   | 10.87  | 1.64   |
| GAIF01003578.1 | 1.29    | 0.49   | 0      | 2.07    | 4.94   | 0.39   |
| GAIF01003579.1 | 0.42    | 0.39   | 0.26   | 0       | 0.94   | 0      |
| GAIF01003581.1 | 55.97   | 64.42  | 109.06 | 28.82   | 17.45  | 25.03  |
| GAIF01003582.1 | 0       | 0      | 0      | 0.18    | 0.95   | 0.17   |
| GAIF01003583.1 | 0       | 0      | 0      | 0       | 0.07   | 0      |
| GAIF01003586.1 | 16.54   | 17.05  | 12.63  | 44.17   | 26.98  | 7.57   |
| GAIF01003589.1 | 0.13    | 0      | 0      | 0       | 3.38   | 0      |
| GAIF01003590.1 | 4.83    | 0.46   | 0.43   | 17.31   | 68.22  | 2.7    |
| GAIF01003592.1 | 0.81    | 2.65   | 0.36   | 10.37   | 19.3   | 0.27   |
| GAIF01003593.1 | 0       | 0.14   | 0      | 0       | 0.1    | 0      |
| GAIF01003595.1 | 0       | 0.09   | 0.09   | 0.58    | 0      | 0.17   |
| GAIF01003596.1 | 0.12    | 0.27   | 0.18   | 0.14    | 0.28   | 0.36   |
| GAIF01003597.1 | 6.58    | 4.29   | 3.32   | 28.72   | 9.18   | 3.48   |
| GAIF01003598.1 | 0       | 0      | 0.16   | 1.22    | 5.76   | 0      |
| GAIF01003599.1 | 0       | 0.4    | 0.34   | 0       | 0.06   | 0      |
| GAIF01003601.1 | 0.12    | 0      | 0      | 0       | 0.14   | 0      |
| GAIF01003602.1 | 0       | 0      | 0      | 0       | 1.17   | 0      |
| GAIF01003604.1 | 17.14   | 6.21   | 0.97   | 50.64   | 233.46 | 11.72  |
| GAIF01003605.1 | 3.72    | 1.4    | 1.76   | 5.01    | 5.38   | 1.79   |
| GAIF01003608.1 | 0.01    | 0      | 0      | 0.09    | 0.01   | 0      |
| GAIF01003610.1 | 0       | 0.06   | 0      | 0       | 0.71   | 0.06   |
| GAIF01003612.1 | 0.48    | 0.34   | 0.12   | 3.26    | 6.6    | 0.19   |

|                |        |        |        |        |        |         |
|----------------|--------|--------|--------|--------|--------|---------|
| GAIF01003613.1 | 0      | 0      | 0      | 0.35   | 0      | 0       |
| GAIF01003614.1 | 1.24   | 2.16   | 0.27   | 4.32   | 5.07   | 0.82    |
| GAIF01003616.1 | 7.53   | 5.71   | 0      | 12.55  | 7.41   | 0       |
| GAIF01003617.1 | 0      | 0.27   | 0.23   | 0.04   | 0.13   | 0.08    |
| GAIF01003618.1 | 0      | 0.23   | 0.15   | 3.08   | 9.9    | 0.23    |
| GAIF01003619.1 | 0.08   | 0      | 0      | 0.2    | 0.92   | 0.21    |
| GAIF01003620.1 | 0      | 0.34   | 0.07   | 0.15   | 0      | 0       |
| GAIF01003621.1 | 0.05   | 0      | 0      | 0.12   | 0.77   | 0.29    |
| GAIF01003622.1 | 14.04  | 56.79  | 17.99  | 3.23   | 21.11  | 0.97    |
| GAIF01003626.1 | 31.28  | 30.32  | 76.27  | 35.28  | 50.16  | 197.7   |
| GAIF01003627.1 | 0      | 0      | 0      | 0      | 0.37   | 0       |
| GAIF01003629.1 | 13.79  | 11.8   | 4.41   | 36.92  | 29.73  | 2       |
| GAIF01003630.1 | 58.61  | 33.64  | 15.77  | 126.77 | 175.02 | 21.98   |
| GAIF01003631.1 | 0      | 0      | 0      | 0      | 0      | 0.05    |
| GAIF01003632.1 | 0.68   | 0.63   | 0.85   | 0.68   | 0.23   | 0.43    |
| GAIF01003634.1 | 38.23  | 25.17  | 21.27  | 75.09  | 28.72  | 9.12    |
| GAIF01003635.1 | 0      | 0      | 0      | 0      | 0.11   | 0       |
| GAIF01003636.1 | 0      | 0      | 0      | 0      | 1.71   | 1.69    |
| GAIF01003638.1 | 2.77   | 2.63   | 3.51   | 6.48   | 7.05   | 0.69    |
| GAIF01003639.1 | 2.7    | 1.73   | 0.19   | 8.09   | 20.29  | 2.49    |
| GAIF01003640.1 | 0      | 0      | 0      | 0      | 0.49   | 0.11    |
| GAIF01003643.1 | 3.25   | 4.95   | 3.14   | 13.73  | 23.19  | 1.58    |
| GAIF01003644.1 | 0.4    | 0.14   | 0      | 2.01   | 6.87   | 0       |
| GAIF01003646.1 | 0      | 0      | 0.16   | 0      | 0      | 0       |
| GAIF01003647.1 | 7.23   | 15.94  | 8.94   | 9.25   | 5.02   | 2.41    |
| GAIF01003648.1 | 1.92   | 2.1    | 0      | 3.76   | 7.02   | 0       |
| GAIF01003649.1 | 42.87  | 77.57  | 74.92  | 8.49   | 15.64  | 10.99   |
| GAIF01003651.1 | 0      | 0.06   | 0.06   | 0      | 0.11   | 0       |
| GAIF01003652.1 | 0.07   | 0      | 0      | 0.91   | 6.21   | 0.24    |
| GAIF01003654.1 | 0.77   | 0.93   | 0.05   | 3.56   | 7.11   | 0.25    |
| GAIF01003657.1 | 0.26   | 0.11   | 0      | 0.23   | 0.67   | 0.22    |
| GAIF01003658.1 | 0.11   | 0      | 0      | 0      | 0      | 0.35    |
| GAIF01003659.1 | 0      | 0.14   | 0      | 0      | 0      | 0       |
| GAIF01003661.1 | 0      | 0.35   | 0.79   | 0      | 0      | 0       |
| GAIF01003662.1 | 0      | 0      | 0      | 0.14   | 0      | 0       |
| GAIF01003663.1 | 1.5    | 1.04   | 1.05   | 4.12   | 12.14  | 0.15    |
| GAIF01003664.1 | 13.43  | 14.7   | 19.51  | 36.11  | 30.37  | 19.09   |
| GAIF01003665.1 | 5.91   | 14.11  | 8.55   | 8.64   | 10.17  | 1.14    |
| GAIF01003666.1 | 26.52  | 34.68  | 58.91  | 64.78  | 38.63  | 36.83   |
| GAIF01003667.1 | 0      | 0      | 0      | 0      | 0.13   | 0       |
| GAIF01003669.1 | 55.41  | 48.69  | 63.3   | 57.67  | 24.59  | 30.65   |
| GAIF01003670.1 | 0.19   | 0.13   | 0      | 3.58   | 7.56   | 0.07    |
| GAIF01003671.1 | 407.38 | 146.44 | 143.01 | 594.07 | 664.66 | 1094.97 |
| GAIF01003672.1 | 0.74   | 0      | 0      | 0.14   | 0      | 0       |

|                |        |         |         |        |        |       |
|----------------|--------|---------|---------|--------|--------|-------|
| GAIF01003673.1 | 0.14   | 0.04    | 0.04    | 0.12   | 0.21   | 0     |
| GAIF01003674.1 | 0.82   | 1.68    | 0       | 3.1    | 4.67   | 0     |
| GAIF01003676.1 | 7.39   | 6.8     | 4.79    | 28.28  | 38.4   | 3.13  |
| GAIF01003677.1 | 1.19   | 0.43    | 0       | 0.61   | 1.11   | 0.29  |
| GAIF01003678.1 | 0.04   | 0       | 0       | 0      | 0      | 0     |
| GAIF01003679.1 | 0      | 0       | 0       | 0      | 0.52   | 0     |
| GAIF01003680.1 | 4.22   | 1.8     | 2.62    | 1.81   | 0.01   | 0     |
| GAIF01003681.1 | 0.36   | 0       | 0.08    | 0.08   | 0.87   | 0     |
| GAIF01003686.1 | 0.24   | 0.45    | 0.59    | 0.23   | 0.1    | 0     |
| GAIF01003687.1 | 25.02  | 15      | 17.28   | 12.46  | 15.48  | 2.35  |
| GAIF01003689.1 | 0.18   | 0       | 0       | 0      | 0      | 0     |
| GAIF01003690.1 | 6.48   | 8.53    | 11.45   | 24.64  | 17.85  | 4.97  |
| GAIF01003692.1 | 0.11   | 0.06    | 0.06    | 0.5    | 2.71   | 0     |
| GAIF01003694.1 | 2.2    | 6.09    | 5.79    | 2.65   | 2.3    | 1.24  |
| GAIF01003695.1 | 0.13   | 0.27    | 0.41    | 0.24   | 0.15   | 0     |
| GAIF01003698.1 | 11.38  | 13.28   | 14.66   | 20.31  | 11.54  | 4.41  |
| GAIF01003699.1 | 6.32   | 1.58    | 0.16    | 5.14   | 13.09  | 1.2   |
| GAIF01003700.1 | 0.3    | 0       | 0       | 1.49   | 6.87   | 0.65  |
| GAIF01003701.1 | 0.05   | 0       | 0       | 0.09   | 0.03   | 0     |
| GAIF01003702.1 | 163.26 | 276.34  | 265.03  | 117.26 | 100.54 | 82.25 |
| GAIF01003703.1 | 357.3  | 2569.04 | 1870.78 | 25     | 72.35  | 54.2  |
| GAIF01003704.1 | 3.44   | 1.7     | 2.13    | 2.17   | 1.75   | 1.91  |
| GAIF01003706.1 | 0      | 0.46    | 0.3     | 0      | 0      | 0.13  |
| GAIF01003707.1 | 8.17   | 3.08    | 0.2     | 5.5    | 19.89  | 8.3   |
| GAIF01003708.1 | 0      | 0.09    | 0       | 0      | 0      | 0     |
| GAIF01003709.1 | 48.76  | 25.62   | 19.83   | 75.56  | 43.8   | 87.7  |
| GAIF01003710.1 | 0      | 0       | 0       | 0.24   | 1.11   | 0     |
| GAIF01003711.1 | 2.18   | 0.79    | 0.27    | 11.53  | 51.38  | 0.53  |
| GAIF01003712.1 | 0      | 0       | 0       | 0      | 0.1    | 0     |
| GAIF01003713.1 | 1.8    | 2.34    | 1.43    | 1.58   | 0.54   | 1.5   |
| GAIF01003715.1 | 0      | 0       | 0       | 0.4    | 0.21   | 0.19  |
| GAIF01003716.1 | 0.41   | 0.27    | 0.18    | 0.38   | 0.39   | 0     |
| GAIF01003718.1 | 0.56   | 1.27    | 0.4     | 5.33   | 12.86  | 0.07  |
| GAIF01003719.1 | 0.18   | 0.1     | 0       | 0.33   | 1.02   | 0.26  |
| GAIF01003720.1 | 0      | 0       | 0       | 0      | 0.03   | 0     |
| GAIF01003722.1 | 0      | 0.09    | 0       | 0      | 0.1    | 0     |
| GAIF01003724.1 | 6.46   | 5.87    | 12.96   | 15.11  | 9.19   | 0     |
| GAIF01003725.1 | 0.57   | 0.17    | 0.06    | 0      | 0      | 0.34  |
| GAIF01003726.1 | 0      | 0       | 0       | 0      | 2.16   | 0     |
| GAIF01003728.1 | 56.18  | 36.76   | 14.08   | 9.38   | 12.98  | 0.74  |
| GAIF01003729.1 | 0      | 0       | 0       | 0.32   | 2.52   | 0.15  |
| GAIF01003730.1 | 2.05   | 1.61    | 1.26    | 2.58   | 2.52   | 1.45  |
| GAIF01003731.1 | 0.11   | 0.16    | 0.25    | 0.09   | 0.27   | 0.08  |
| GAIF01003732.1 | 243.47 | 3.23    | 4.32    | 8.12   | 0.68   | 1.77  |

|                |         |         |         |         |         |         |
|----------------|---------|---------|---------|---------|---------|---------|
| GAIF01003733.1 | 0       | 0       | 0       | 0       | 1.22    | 2.4     |
| GAIF01003734.1 | 0       | 0       | 0       | 0.11    | 0.45    | 0.2     |
| GAIF01003735.1 | 0.27    | 0.06    | 0.03    | 1.23    | 4.49    | 0.63    |
| GAIF01003736.1 | 0.92    | 0.22    | 0.12    | 0.16    | 0       | 0       |
| GAIF01003739.1 | 0       | 0       | 0       | 0.17    | 1.03    | 0.08    |
| GAIF01003740.1 | 0       | 0       | 0       | 0.03    | 0.04    | 0       |
| GAIF01003741.1 | 71.75   | 113.71  | 90.47   | 24.36   | 26.52   | 12.1    |
| GAIF01003744.1 | 0.2     | 0       | 0       | 1.35    | 4.62    | 0.06    |
| GAIF01003745.1 | 0       | 0       | 0       | 0.43    | 5.47    | 0       |
| GAIF01003747.1 | 4.62    | 4.71    | 1.08    | 7.73    | 6.17    | 0.67    |
| GAIF01003748.1 | 0       | 0       | 0       | 0.16    | 0.51    | 0.31    |
| GAIF01003750.1 | 192.22  | 206.06  | 265.68  | 279.82  | 147.19  | 92.27   |
| GAIF01003752.1 | 0.03    | 0       | 0.03    | 0.07    | 0.34    | 0       |
| GAIF01003753.1 | 10.99   | 14.86   | 17.83   | 38.63   | 17.27   | 5.79    |
| GAIF01003754.1 | 0       | 0.14    | 0       | 0       | 0.16    | 0       |
| GAIF01003755.1 | 3.89    | 0       | 3.26    | 10.2    | 8.66    | 15.51   |
| GAIF01003756.1 | 22.12   | 133.68  | 155.02  | 0       | 6.02    | 3.37    |
| GAIF01003757.1 | 0.09    | 0.11    | 0.29    | 0.03    | 0.41    | 0.07    |
| GAIF01003758.1 | 0.34    | 0.07    | 0.03    | 1.94    | 6.11    | 1.49    |
| GAIF01003760.1 | 2111.34 | 1453.54 | 2565.21 | 692.2   | 411.3   | 439.63  |
| GAIF01003762.1 | 0       | 0       | 0       | 0       | 0.39    | 0       |
| GAIF01003763.1 | 11.36   | 3.31    | 3.11    | 15.67   | 17.63   | 14.95   |
| GAIF01003764.1 | 0       | 0       | 0       | 0       | 0.19    | 0       |
| GAIF01003765.1 | 3247.25 | 1552.54 | 1144.35 | 1744.73 | 1567.59 | 1168.07 |
| GAIF01003766.1 | 0       | 0       | 0       | 0       | 0       | 0.09    |
| GAIF01003767.1 | 0       | 0       | 0       | 0       | 1.17    | 0       |
| GAIF01003769.1 | 0.14    | 0.16    | 0       | 0.85    | 4.26    | 0.08    |
| GAIF01003770.1 | 1.11    | 0.58    | 0.6     | 1.6     | 1.66    | 0       |
| GAIF01003771.1 | 0.62    | 0.67    | 0.27    | 0.86    | 0.74    | 0       |
| GAIF01003772.1 | 133.2   | 33.78   | 54.37   | 52.64   | 37.48   | 38.6    |
| GAIF01003773.1 | 1.22    | 1.51    | 0       | 0.35    | 0.08    | 0.2     |
| GAIF01003774.1 | 0       | 0       | 0       | 0       | 0       | 0.04    |
| GAIF01003775.1 | 1.24    | 0.43    | 0       | 0       | 0.3     | 0.24    |
| GAIF01003776.1 | 0.11    | 0       | 0       | 0       | 0.12    | 0       |
| GAIF01003777.1 | 0.42    | 0.09    | 0.09    | 4.5     | 19.25   | 0.37    |
| GAIF01003778.1 | 1.16    | 2.65    | 1.31    | 9.96    | 22.53   | 1.71    |
| GAIF01003780.1 | 0.02    | 0       | 0       | 0       | 0       | 0.04    |
| GAIF01003781.1 | 7.77    | 15.02   | 4.13    | 18.5    | 21.14   | 0.63    |
| GAIF01003782.1 | 0       | 0       | 0       | 0       | 0.38    | 0       |
| GAIF01003783.1 | 1.57    | 1.87    | 0.79    | 3.85    | 2.84    | 0.65    |
| GAIF01003785.1 | 0.11    | 0.06    | 0.06    | 0.39    | 1.29    | 0.06    |
| GAIF01003786.1 | 13.66   | 10.98   | 11.81   | 27.31   | 47.9    | 16.68   |
| GAIF01003789.1 | 0.28    | 0.15    | 0       | 1.35    | 23.97   | 34.25   |
| GAIF01003790.1 | 0       | 0       | 0       | 0       | 0.48    | 0       |

|                |        |        |        |        |        |        |
|----------------|--------|--------|--------|--------|--------|--------|
| GAIF01003791.1 | 0.78   | 1      | 1.49   | 1.64   | 1.5    | 0.98   |
| GAIF01003792.1 | 3.08   | 2.99   | 0.48   | 18.87  | 34.08  | 0.85   |
| GAIF01003794.1 | 7.61   | 5.74   | 7.87   | 17.56  | 10.05  | 13.67  |
| GAIF01003796.1 | 0.77   | 0.46   | 0.54   | 3.75   | 8.36   | 3.79   |
| GAIF01003797.1 | 135.48 | 216.05 | 299.12 | 134.02 | 105.58 | 79.99  |
| GAIF01003798.1 | 114.4  | 113.99 | 154.87 | 65.46  | 66.28  | 234.79 |
| GAIF01003799.1 | 0.49   | 0.21   | 0.11   | 1.13   | 0      | 0.21   |
| GAIF01003802.1 | 13.47  | 5.67   | 23.55  | 39.37  | 13.81  | 9.45   |
| GAIF01003803.1 | 8.1    | 2.82   | 5.6    | 16.72  | 14.04  | 21.4   |
| GAIF01003804.1 | 9.52   | 4.02   | 1.12   | 1.39   | 0.33   | 0.1    |
| GAIF01003805.1 | 18.33  | 6.63   | 2.17   | 1.25   | 2.98   | 0.65   |
| GAIF01003806.1 | 0      | 0      | 0      | 0.06   | 0.12   | 0      |
| GAIF01003807.1 | 10.13  | 11.18  | 5.71   | 99.08  | 111.81 | 6.22   |
| GAIF01003808.1 | 1.19   | 0.73   | 1.06   | 1.95   | 1.48   | 0      |
| GAIF01003809.1 | 5.63   | 13.11  | 1.26   | 9.53   | 22.79  | 0.95   |
| GAIF01003810.1 | 1.83   | 2.2    | 1.03   | 4.22   | 14.68  | 0.37   |
| GAIF01003811.1 | 8.05   | 2.28   | 0.35   | 12.98  | 18.96  | 2.84   |
| GAIF01003814.1 | 2.06   | 1.77   | 0.24   | 12.73  | 22.26  | 0.48   |
| GAIF01003815.1 | 0      | 0      | 0      | 0      | 0.16   | 0      |
| GAIF01003817.1 | 33.58  | 44.9   | 27.3   | 74.9   | 84.24  | 10.64  |
| GAIF01003819.1 | 0      | 0.18   | 0.18   | 0.75   | 1.55   | 0      |
| GAIF01003820.1 | 17.55  | 20.82  | 20.15  | 15.16  | 9.54   | 5.12   |
| GAIF01003821.1 | 40.81  | 70.82  | 97.38  | 105.28 | 98.31  | 31.96  |
| GAIF01003822.1 | 4.39   | 8.5    | 4.49   | 3.66   | 2.99   | 0.47   |
| GAIF01003824.1 | 46.79  | 39.33  | 20.12  | 41.25  | 35.06  | 3.21   |
| GAIF01003825.1 | 0.16   | 0.17   | 0.52   | 0.91   | 3.78   | 0.17   |
| GAIF01003826.1 | 0.29   | 0      | 0      | 0.67   | 3.82   | 0.74   |
| GAIF01003827.1 | 0.7    | 0      | 0.05   | 0.81   | 3.98   | 0.21   |
| GAIF01003828.1 | 1.09   | 0.94   | 2.16   | 0.53   | 0.51   | 1.1    |
| GAIF01003829.1 | 0.22   | 0.18   | 0      | 2.81   | 7.64   | 0.06   |
| GAIF01003830.1 | 0      | 0      | 0      | 0.97   | 4.2    | 0      |
| GAIF01003831.1 | 0.18   | 0.17   | 0.23   | 0      | 2.01   | 0      |
| GAIF01003832.1 | 0      | 0      | 0      | 0.32   | 2.2    | 0.14   |
| GAIF01003833.1 | 3.61   | 4.14   | 3.89   | 4.42   | 3.02   | 2.62   |
| GAIF01003835.1 | 4.43   | 9.97   | 2.53   | 15.64  | 16.21  | 0.14   |
| GAIF01003836.1 | 0.05   | 0      | 0      | 0.41   | 1.28   | 0.08   |
| GAIF01003837.1 | 6.37   | 3.87   | 3.74   | 15.09  | 10.43  | 10.82  |
| GAIF01003838.1 | 0.23   | 0.06   | 0.08   | 1.21   | 5.22   | 0.19   |
| GAIF01003839.1 | 0.73   | 2.01   | 2.58   | 26.46  | 24.64  | 87.67  |
| GAIF01003840.1 | 0      | 2.25   | 4.75   | 0      | 0      | 0      |
| GAIF01003843.1 | 0.4    | 0.44   | 1.32   | 0.46   | 0.5    | 0.59   |
| GAIF01003844.1 | 16.73  | 30.37  | 16.65  | 28.29  | 17.28  | 9.47   |
| GAIF01003846.1 | 0.08   | 0.09   | 0.09   | 0.28   | 2.39   | 0      |
| GAIF01003847.1 | 26.58  | 14.33  | 12.15  | 19.61  | 30.61  | 15.21  |

|                |        |        |        |        |        |        |
|----------------|--------|--------|--------|--------|--------|--------|
| GAIF01003848.1 | 0.19   | 0      | 0      | 0.55   | 1.25   | 3.23   |
| GAIF01003850.1 | 0.11   | 0.29   | 0.21   | 0.44   | 0.43   | 0.04   |
| GAIF01003852.1 | 65.14  | 55.1   | 85.2   | 247.81 | 217.5  | 247.55 |
| GAIF01003854.1 | 0.87   | 0.8    | 0      | 2.39   | 1.77   | 0.82   |
| GAIF01003855.1 | 5.36   | 7.49   | 7.34   | 4.97   | 1.93   | 0.59   |
| GAIF01003856.1 | 381.73 | 291.62 | 484.16 | 105.56 | 45.01  | 155.47 |
| GAIF01003857.1 | 0      | 0      | 0      | 0      | 0.45   | 0      |
| GAIF01003858.1 | 0      | 0      | 1.54   | 0      | 0      | 0      |
| GAIF01003859.1 | 0.12   | 0.16   | 0      | 0.81   | 1.88   | 0      |
| GAIF01003860.1 | 29.35  | 20.95  | 13.62  | 10.82  | 12.91  | 1.13   |
| GAIF01003862.1 | 1.34   | 0.89   | 0      | 4.6    | 8.19   | 0.19   |
| GAIF01003867.1 | 6.99   | 0.37   | 3.65   | 48.45  | 62.19  | 7.14   |
| GAIF01003869.1 | 0.1    | 0      | 0      | 1.32   | 2.86   | 0      |
| GAIF01003870.1 | 58.75  | 92.84  | 193.73 | 94.08  | 68.4   | 53.4   |
| GAIF01003872.1 | 9.3    | 0      | 1.82   | 0.02   | 0      | 0      |
| GAIF01003873.1 | 0      | 2.8    | 0      | 2.53   | 2.87   | 0      |
| GAIF01003875.1 | 0      | 0.15   | 2.04   | 0      | 0      | 0      |
| GAIF01003876.1 | 0      | 0      | 0      | 0.13   | 0.14   | 0      |
| GAIF01003877.1 | 0      | 0      | 0      | 0      | 1.45   | 0      |
| GAIF01003881.1 | 0.12   | 0      | 0.13   | 0.28   | 1.87   | 0.39   |
| GAIF01003883.1 | 0      | 0      | 0      | 0.39   | 1.74   | 0.17   |
| GAIF01003884.1 | 0.04   | 0      | 0.04   | 0.34   | 0.31   | 0.2    |
| GAIF01003886.1 | 405.89 | 136.89 | 32.43  | 372.3  | 425.25 | 28.67  |
| GAIF01003887.1 | 0      | 0.18   | 0      | 0.22   | 0.21   | 0.37   |
| GAIF01003888.1 | 0      | 0      | 0      | 0.07   | 2.63   | 0.01   |
| GAIF01003889.1 | 0.04   | 0      | 0      | 0      | 2.23   | 0      |
| GAIF01003890.1 | 0.29   | 0      | 0      | 1.18   | 4.02   | 0.64   |
| GAIF01003891.1 | 0      | 0      | 0.53   | 0      | 0      | 0      |
| GAIF01003893.1 | 74.6   | 124.62 | 51.88  | 162.5  | 106.8  | 19.5   |
| GAIF01003895.1 | 56.54  | 42.78  | 130.69 | 121.57 | 69.63  | 184    |
| GAIF01003896.1 | 1.89   | 1.42   | 0.29   | 3.8    | 8.05   | 1.31   |
| GAIF01003897.1 | 89.25  | 64.03  | 161.63 | 35.24  | 16.6   | 66.93  |
| GAIF01003898.1 | 0      | 0      | 0      | 0      | 0.36   | 0      |
| GAIF01003899.1 | 0.04   | 0      | 0      | 0      | 0      | 0.21   |
| GAIF01003900.1 | 4.62   | 6.35   | 5.07   | 2.76   | 1.22   | 0.07   |
| GAIF01003901.1 | 2.76   | 1.24   | 1.23   | 3.09   | 8.17   | 10.39  |
| GAIF01003902.1 | 5.01   | 3.43   | 0.59   | 0.66   | 0.04   | 0.03   |
| GAIF01003903.1 | 0.92   | 1.04   | 1.68   | 1.61   | 0.85   | 1.76   |
| GAIF01003904.1 | 0.3    | 0      | 0      | 1.78   | 11.15  | 0.15   |
| GAIF01003905.1 | 0      | 0      | 0      | 0      | 0.64   | 0      |
| GAIF01003907.1 | 11.93  | 11.47  | 13.21  | 42.71  | 31.6   | 12.73  |
| GAIF01003909.1 | 7.94   | 5.45   | 8.02   | 1.45   | 1.84   | 0.31   |
| GAIF01003910.1 | 2.65   | 1.1    | 2.36   | 6.01   | 7.44   | 4.59   |
| GAIF01003911.1 | 0      | 0.08   | 0.13   | 0.49   | 4.69   | 0.09   |

|                |        |        |        |        |        |       |
|----------------|--------|--------|--------|--------|--------|-------|
| GAIF01003912.1 | 8.33   | 4.99   | 11.53  | 8.55   | 3.92   | 14.9  |
| GAIF01003913.1 | 0      | 0      | 0      | 0      | 0.22   | 0     |
| GAIF01003914.1 | 6.93   | 12.05  | 3.24   | 19.18  | 14.12  | 2.4   |
| GAIF01003915.1 | 3.46   | 4.48   | 4.53   | 3.57   | 6.96   | 0.62  |
| GAIF01003916.1 | 34.59  | 26.65  | 39.38  | 30.52  | 44.42  | 58.65 |
| GAIF01003917.1 | 0.03   | 0.07   | 0      | 0.82   | 4.48   | 0     |
| GAIF01003919.1 | 5.19   | 7.28   | 20.91  | 0      | 0      | 5.92  |
| GAIF01003920.1 | 0.16   | 0.37   | 0      | 1.63   | 3.96   | 0     |
| GAIF01003922.1 | 1.46   | 1      | 0.2    | 1.91   | 9.69   | 0.81  |
| GAIF01003923.1 | 0      | 0.13   | 0.13   | 0.54   | 0.56   | 0.52  |
| GAIF01003924.1 | 4.98   | 3.9    | 3.65   | 2.26   | 0.05   | 0.84  |
| GAIF01003927.1 | 22.27  | 24.47  | 15.79  | 10.62  | 7.24   | 2.85  |
| GAIF01003928.1 | 0      | 0      | 0      | 0      | 0.11   | 0.1   |
| GAIF01003930.1 | 0      | 0      | 0      | 24.2   | 29.49  | 1.93  |
| GAIF01003931.1 | 3.85   | 2.92   | 1.47   | 11.92  | 16.22  | 0.71  |
| GAIF01003933.1 | 0.3    | 0.45   | 0      | 0.28   | 0.24   | 0     |
| GAIF01003934.1 | 2.21   | 2.95   | 1.31   | 3.66   | 5.3    | 0.21  |
| GAIF01003935.1 | 0      | 0      | 0      | 0      | 0.54   | 0     |
| GAIF01003936.1 | 0      | 0      | 0      | 0      | 0.83   | 0     |
| GAIF01003937.1 | 297.73 | 595.67 | 288.06 | 39.43  | 63.96  | 19.67 |
| GAIF01003938.1 | 0.56   | 0.2    | 0.14   | 0.8    | 0.22   | 0.55  |
| GAIF01003939.1 | 1.68   | 0.15   | 0      | 4.38   | 1.55   | 2.73  |
| GAIF01003940.1 | 0      | 0      | 0      | 0      | 0.17   | 0     |
| GAIF01003941.1 | 6.74   | 9.82   | 12.38  | 36.88  | 19.94  | 12.06 |
| GAIF01003942.1 | 45.08  | 44.85  | 20.96  | 79.74  | 90.88  | 6.88  |
| GAIF01003944.1 | 0      | 0      | 0      | 0      | 0.04   | 0     |
| GAIF01003946.1 | 0      | 0      | 0      | 0.09   | 0.73   | 0     |
| GAIF01003948.1 | 11.79  | 8.82   | 8.86   | 2.23   | 0.9    | 0.74  |
| GAIF01003949.1 | 71.43  | 33.83  | 26.84  | 134.39 | 165.39 | 59.33 |
| GAIF01003950.1 | 0.13   | 0      | 0.15   | 0.05   | 0.03   | 0     |
| GAIF01003951.1 | 0      | 0      | 0.05   | 0.29   | 0.48   | 0.11  |
| GAIF01003953.1 | 0      | 0.06   | 0      | 0.08   | 0.26   | 0     |
| GAIF01003955.1 | 1.1    | 0      | 0.03   | 0.53   | 0.04   | 0     |
| GAIF01003957.1 | 0      | 0.11   | 0.11   | 0.12   | 0.12   | 0     |
| GAIF01003959.1 | 1.35   | 1.08   | 0.47   | 2.91   | 4.59   | 0.56  |
| GAIF01003961.1 | 0.29   | 0      | 0      | 0.11   | 0.18   | 0     |
| GAIF01003962.1 | 0      | 0      | 0      | 0      | 0.03   | 0.08  |
| GAIF01003963.1 | 0      | 0      | 0      | 0      | 0.49   | 0     |
| GAIF01003964.1 | 0.01   | 0      | 0      | 0      | 0      | 1.69  |
| GAIF01003965.1 | 4.22   | 1.85   | 0      | 0.61   | 0.38   | 0     |
| GAIF01003967.1 | 0      | 0.11   | 0      | 0.06   | 0.22   | 0     |
| GAIF01003968.1 | 1.46   | 0.74   | 0.19   | 0.59   | 0.62   | 0     |
| GAIF01003969.1 | 27.65  | 21.01  | 9.22   | 74.05  | 110.4  | 3.28  |
| GAIF01003971.1 | 0.05   | 0.05   | 0.05   | 0      | 0      | 0.11  |



|                |         |        |        |         |         |         |
|----------------|---------|--------|--------|---------|---------|---------|
| GAIF01003973.1 | 0.77    | 0      | 1.37   | 1.9     | 2.33    | 2.87    |
| GAIF01003974.1 | 0.09    | 0.09   | 0.1    | 0.05    | 0.05    | 0.14    |
| GAIF01003975.1 | 23.72   | 52.68  | 41.27  | 30.29   | 22.27   | 7.34    |
| GAIF01003977.1 | 0.49    | 0      | 0      | 0.28    | 0.92    | 0       |
| GAIF01003978.1 | 0.03    | 0      | 0.3    | 0       | 0       | 0       |
| GAIF01003979.1 | 0       | 0      | 0      | 3.39    | 7.43    | 0       |
| GAIF01003980.1 | 19.28   | 11.83  | 21.67  | 24.64   | 22.76   | 49.67   |
| GAIF01003981.1 | 0.08    | 0      | 0      | 0       | 0       | 0       |
| GAIF01003982.1 | 0       | 0      | 0      | 0       | 0.15    | 0.03    |
| GAIF01003984.1 | 21.27   | 34.51  | 17.69  | 60.28   | 55.02   | 5.2     |
| GAIF01003985.1 | 4001.17 | 2946.9 | 1977   | 2715.99 | 2123.19 | 2195.99 |
| GAIF01003987.1 | 0.06    | 0      | 0      | 0       | 0       | 0       |
| GAIF01003989.1 | 0       | 0.23   | 0.23   | 0       | 0       | 0.06    |
| GAIF01003990.1 | 0.59    | 0      | 0      | 0.32    | 3.4     | 2.24    |
| GAIF01003991.1 | 0.08    | 0.13   | 0.26   | 0.64    | 0.71    | 0       |
| GAIF01003994.1 | 0.26    | 0      | 0      | 0       | 2.15    | 0       |
| GAIF01003995.1 | 6.62    | 8.48   | 7.55   | 20.91   | 17.02   | 5.56    |
| GAIF01003996.1 | 4.29    | 1.78   | 1.73   | 8.02    | 19.84   | 0.56    |
| GAIF01003997.1 | 0       | 0.07   | 0.15   | 0.32    | 0.98    | 0       |
| GAIF01003998.1 | 0.11    | 0.22   | 0.39   | 0.45    | 0.18    | 0       |
| GAIF01003999.1 | 24.51   | 37.72  | 57.95  | 8.39    | 1.46    | 15.36   |
| GAIF01004000.1 | 0.11    | 0      | 0      | 0.12    | 1.41    | 0.08    |
| GAIF01004001.1 | 2.16    | 1.15   | 1.02   | 5.07    | 4.64    | 0.82    |
| GAIF01004003.1 | 0.3     | 0      | 0      | 0.17    | 0.18    | 0       |
| GAIF01004004.1 | 0.12    | 0      | 0      | 0.49    | 0       | 0.13    |
| GAIF01004005.1 | 6.19    | 10.27  | 5.87   | 35.41   | 26.44   | 1.11    |
| GAIF01004006.1 | 88.81   | 95.42  | 121.23 | 120.56  | 140.05  | 313.33  |
| GAIF01004007.1 | 9.39    | 14.14  | 8.73   | 35.5    | 18.39   | 7.3     |
| GAIF01004008.1 | 188.55  | 102.76 | 166.27 | 108.44  | 35.28   | 68.31   |
| GAIF01004010.1 | 4.02    | 5.71   | 2.97   | 5.7     | 12.31   | 3.56    |
| GAIF01004011.1 | 0.1     | 0.55   | 0.33   | 0       | 0.12    | 0.27    |
| GAIF01004013.1 | 0       | 0      | 0      | 0       | 0.12    | 0       |
| GAIF01004014.1 | 2.89    | 0.27   | 0      | 0.81    | 0       | 0       |
| GAIF01004015.1 | 0       | 0.04   | 0      | 0       | 0.04    | 0       |
| GAIF01004016.1 | 56.55   | 85.49  | 67.48  | 108.39  | 77.83   | 15.12   |
| GAIF01004017.1 | 0.4     | 0      | 0.13   | 0.67    | 1.25    | 0.13    |
| GAIF01004018.1 | 0       | 0      | 0      | 0       | 2.38    | 0       |
| GAIF01004019.1 | 11.5    | 17.91  | 31.45  | 23.56   | 16.55   | 10.44   |
| GAIF01004020.1 | 0       | 0      | 0      | 0       | 0.09    | 0       |
| GAIF01004022.1 | 0.09    | 0      | 0      | 0       | 0.29    | 0.06    |
| GAIF01004023.1 | 22.75   | 15.55  | 14.4   | 33.94   | 22.84   | 8.95    |
| GAIF01004024.1 | 22.12   | 34.41  | 3.16   | 28.13   | 68.59   | 4.23    |
| GAIF01004025.1 | 0       | 0      | 0.07   | 0.3     | 0.95    | 0       |
| GAIF01004026.1 | 0.41    | 1.87   | 1.56   | 0.12    | 0.12    | 0       |

|                |         |        |        |        |        |         |
|----------------|---------|--------|--------|--------|--------|---------|
| GAIF01004027.1 | 1.18    | 2.92   | 0.61   | 3.31   | 3.23   | 0.02    |
| GAIF01004029.1 | 0.05    | 0.16   | 0.08   | 0.06   | 0.09   | 0       |
| GAIF01004030.1 | 585.1   | 317.25 | 586.75 | 142.33 | 84.51  | 285.4   |
| GAIF01004033.1 | 0       | 0      | 0      | 0      | 0.12   | 0       |
| GAIF01004034.1 | 0       | 0      | 0      | 0.14   | 0      | 0       |
| GAIF01004035.1 | 20.55   | 16.66  | 22.96  | 40.7   | 20.05  | 44.95   |
| GAIF01004036.1 | 0.16    | 0      | 0.09   | 0.14   | 0.37   | 0.18    |
| GAIF01004037.1 | 0       | 0      | 0      | 16.16  | 20.6   | 0       |
| GAIF01004038.1 | 7.15    | 1.15   | 0.61   | 14.72  | 37.54  | 4.42    |
| GAIF01004041.1 | 0       | 0      | 0      | 0      | 0.07   | 0       |
| GAIF01004042.1 | 0.14    | 0.06   | 0.12   | 0.6    | 3.35   | 0       |
| GAIF01004043.1 | 44.41   | 46.64  | 15.59  | 30.32  | 60.22  | 56.54   |
| GAIF01004044.1 | 0.04    | 0      | 0      | 0      | 0      | 0       |
| GAIF01004045.1 | 0.04    | 0      | 0      | 0      | 0.17   | 0       |
| GAIF01004046.1 | 1784.87 | 340.52 | 548.26 | 914.46 | 316.38 | 2004.09 |
| GAIF01004047.1 | 4.37    | 0      | 0      | 4.84   | 15.52  | 16.28   |
| GAIF01004051.1 | 14.57   | 10.62  | 25.44  | 25.92  | 24.57  | 17.8    |
| GAIF01004052.1 | 1.01    | 0.45   | 0      | 9.01   | 20.37  | 0.68    |
| GAIF01004053.1 | 3.99    | 5.7    | 5.51   | 12.98  | 7.34   | 1.22    |
| GAIF01004055.1 | 27.49   | 12.06  | 1.99   | 21.17  | 20.37  | 6.06    |
| GAIF01004056.1 | 2.23    | 0.64   | 0      | 3.5    | 43.32  | 84.87   |
| GAIF01004057.1 | 2.15    | 1.51   | 1.77   | 0.18   | 0.19   | 0       |
| GAIF01004058.1 | 0.81    | 0.21   | 0.11   | 4.9    | 18.77  | 0.25    |
| GAIF01004059.1 | 0       | 0.11   | 0      | 0      | 0      | 0       |
| GAIF01004060.1 | 40.15   | 71.57  | 10.29  | 71.32  | 93.71  | 2.07    |
| GAIF01004062.1 | 0       | 0      | 0      | 0.23   | 0.36   | 0       |
| GAIF01004063.1 | 63.48   | 126.61 | 201.69 | 505.24 | 318.97 | 165.29  |
| GAIF01004064.1 | 0       | 0      | 0      | 0.88   | 2.99   | 0.78    |
| GAIF01004065.1 | 0.07    | 0.07   | 0      | 0      | 0.25   | 0       |
| GAIF01004066.1 | 0.42    | 0.68   | 0      | 1.43   | 1.84   | 0       |
| GAIF01004068.1 | 0.38    | 0.21   | 0.16   | 3.38   | 1.9    | 0.11    |
| GAIF01004070.1 | 16.95   | 11.26  | 17.73  | 35.83  | 34.5   | 17.53   |
| GAIF01004071.1 | 0       | 0      | 0      | 0      | 0.04   | 0       |
| GAIF01004072.1 | 0.2     | 0.04   | 0.04   | 5.06   | 17.29  | 0.44    |
| GAIF01004073.1 | 0.41    | 0.32   | 0.92   | 1.06   | 1.32   | 0.75    |
| GAIF01004074.1 | 0       | 0.15   | 0      | 0.09   | 0.5    | 0       |
| GAIF01004075.1 | 0       | 0      | 0      | 0.39   | 0.55   | 0       |
| GAIF01004077.1 | 24.67   | 19.11  | 40.5   | 60.76  | 42.8   | 63.66   |
| GAIF01004079.1 | 0.06    | 0      | 0      | 0      | 0      | 0       |
| GAIF01004080.1 | 0.16    | 0.27   | 0.15   | 0.09   | 0.2    | 0       |
| GAIF01004081.1 | 0.21    | 0.23   | 0.4    | 0.94   | 1.03   | 0.23    |
| GAIF01004082.1 | 0       | 0      | 0      | 0.06   | 0.06   | 0       |
| GAIF01004083.1 | 193.04  | 55.82  | 88.24  | 125.13 | 83.53  | 672.61  |
| GAIF01004085.1 | 120.18  | 81.12  | 115.57 | 141.54 | 40.78  | 48.35   |

|                |        |        |         |        |        |        |
|----------------|--------|--------|---------|--------|--------|--------|
| GAIF01004087.1 | 0      | 0      | 0.07    | 0.11   | 0.5    | 0      |
| GAIF01004089.1 | 0.12   | 0.13   | 0       | 0      | 0      | 0      |
| GAIF01004090.1 | 0      | 0      | 0       | 0.18   | 0      | 0      |
| GAIF01004092.1 | 0.07   | 0.04   | 0.06    | 0.56   | 2.03   | 0.32   |
| GAIF01004093.1 | 0      | 0.01   | 0       | 0      | 0      | 0      |
| GAIF01004095.1 | 0.58   | 0.46   | 0.1     | 0.63   | 0.71   | 0.59   |
| GAIF01004096.1 | 0.61   | 0.52   | 0.95    | 0.77   | 0.02   | 0      |
| GAIF01004098.1 | 0      | 0      | 7.01    | 20.92  | 20.63  | 1.36   |
| GAIF01004099.1 | 161.48 | 185.47 | 380.23  | 156.54 | 104.9  | 277.56 |
| GAIF01004100.1 | 1.42   | 3.35   | 3.21    | 2.02   | 0.48   | 2.26   |
| GAIF01004101.1 | 5.32   | 7.56   | 11.86   | 27.33  | 16.98  | 5.92   |
| GAIF01004102.1 | 1.16   | 3.04   | 2.39    | 3.51   | 3.64   | 0.17   |
| GAIF01004103.1 | 3.74   | 1.5    | 4.76    | 4.31   | 3.3    | 4.76   |
| GAIF01004104.1 | 13.01  | 7.74   | 6.23    | 36.34  | 36.59  | 29.03  |
| GAIF01004105.1 | 5.99   | 18.23  | 4.38    | 28.96  | 58.57  | 11.88  |
| GAIF01004106.1 | 29.28  | 15.04  | 33.53   | 3.32   | 2.64   | 3.82   |
| GAIF01004107.1 | 0.13   | 0      | 0       | 1.85   | 8.77   | 0      |
| GAIF01004109.1 | 0.84   | 0.61   | 1.53    | 1.78   | 3.02   | 0.62   |
| GAIF01004111.1 | 1.02   | 0.1    | 0.03    | 0.14   | 0.04   | 0      |
| GAIF01004112.1 | 0      | 0      | 0       | 0      | 0.12   | 0      |
| GAIF01004113.1 | 0.35   | 0.57   | 1.15    | 1.63   | 0.63   | 0.39   |
| GAIF01004114.1 | 0      | 0      | 0       | 0.43   | 3.57   | 0      |
| GAIF01004115.1 | 0      | 0      | 2.76    | 0      | 0      | 2.04   |
| GAIF01004116.1 | 0.44   | 0.58   | 0.2     | 0.92   | 1.17   | 0.1    |
| GAIF01004118.1 | 0.22   | 0.12   | 0.13    | 0.41   | 1.26   | 0      |
| GAIF01004120.1 | 0.18   | 0      | 0       | 0      | 1.25   | 0.4    |
| GAIF01004121.1 | 0.22   | 0.37   | 0.49    | 0.13   | 0.14   | 0      |
| GAIF01004122.1 | 0      | 0      | 0       | 0.21   | 0      | 0      |
| GAIF01004123.1 | 17.12  | 3.53   | 1.73    | 102.28 | 237.73 | 28.63  |
| GAIF01004126.1 | 3.49   | 3.06   | 2.1     | 11.38  | 16.4   | 1.99   |
| GAIF01004127.1 | 0      | 0      | 0       | 0.02   | 0.04   | 0      |
| GAIF01004129.1 | 5.73   | 1.26   | 0.68    | 9.38   | 88.11  | 7.1    |
| GAIF01004131.1 | 2.07   | 2.17   | 6.09    | 0.32   | 0.48   | 0.93   |
| GAIF01004133.1 | 0      | 0      | 0       | 0.11   | 0.11   | 0      |
| GAIF01004134.1 | 0      | 0      | 0       | 0      | 0.07   | 0      |
| GAIF01004135.1 | 162.24 | 355.03 | 1036.29 | 78.38  | 40.52  | 114.07 |
| GAIF01004136.1 | 1.72   | 1.05   | 1.06    | 0.08   | 0.08   | 0.3    |
| GAIF01004141.1 | 0      | 0      | 0       | 0.05   | 0.11   | 0      |
| GAIF01004142.1 | 0.2    | 0      | 0.65    | 0.39   | 0.18   | 0      |
| GAIF01004143.1 | 0.06   | 0.1    | 0       | 0.27   | 2.47   | 0      |
| GAIF01004144.1 | 7.62   | 7.28   | 6.45    | 1.6    | 0.22   | 0.3    |
| GAIF01004145.1 | 3.69   | 0.8    | 0.27    | 13.91  | 45.67  | 14.38  |
| GAIF01004146.1 | 0.96   | 2.96   | 0.7     | 4.27   | 4.04   | 0.35   |
| GAIF01004147.1 | 0      | 0      | 0.1     | 0      | 0      | 0      |

|                |         |         |        |         |         |         |
|----------------|---------|---------|--------|---------|---------|---------|
| GAIF01004148.1 | 0.11    | 0       | 0      | 0       | 0       | 0       |
| GAIF01004149.1 | 212.55  | 137.29  | 53.89  | 0.8     | 0.65    | 0       |
| GAIF01004150.1 | 0.52    | 1.27    | 0.93   | 1.66    | 0.62    | 0.64    |
| GAIF01004152.1 | 26.74   | 67.57   | 43.37  | 6.29    | 3.33    | 0.53    |
| GAIF01004154.1 | 9.37    | 14.26   | 8.23   | 6.52    | 4.51    | 2.06    |
| GAIF01004155.1 | 0       | 0       | 0.08   | 0       | 0.21    | 0.21    |
| GAIF01004156.1 | 0       | 0.38    | 0      | 0.26    | 0       | 0       |
| GAIF01004158.1 | 0.77    | 0.26    | 0      | 1.74    | 10.33   | 0.27    |
| GAIF01004159.1 | 0.93    | 0.83    | 0.41   | 0.4     | 2.04    | 0.83    |
| GAIF01004160.1 | 0.31    | 0       | 0      | 1.83    | 7.17    | 0       |
| GAIF01004161.1 | 3.59    | 2.03    | 2.21   | 8.27    | 17.96   | 3.41    |
| GAIF01004162.1 | 0.15    | 0       | 0.06   | 2.26    | 6.77    | 0.45    |
| GAIF01004164.1 | 0.52    | 0.53    | 0.26   | 0.23    | 2.64    | 0.32    |
| GAIF01004165.1 | 25.47   | 23.88   | 20.11  | 63.04   | 60.69   | 24.54   |
| GAIF01004166.1 | 1.71    | 2.04    | 0.38   | 6.74    | 7.6     | 0.19    |
| GAIF01004168.1 | 1.36    | 0       | 1.23   | 2.28    | 2.77    | 0       |
| GAIF01004169.1 | 0       | 0.82    | 0      | 0       | 0       | 0       |
| GAIF01004170.1 | 0       | 0.03    | 0      | 0.03    | 0       | 0       |
| GAIF01004171.1 | 0.02    | 0       | 0      | 0       | 0       | 0       |
| GAIF01004172.1 | 0.04    | 0       | 0      | 1.13    | 0.56    | 0.21    |
| GAIF01004173.1 | 0.32    | 0.31    | 0.84   | 1.52    | 0.96    | 0.43    |
| GAIF01004174.1 | 0       | 0       | 0      | 0       | 0.38    | 0       |
| GAIF01004175.1 | 0.65    | 0       | 0.14   | 0       | 0       | 0       |
| GAIF01004176.1 | 0.13    | 0.09    | 0      | 0.58    | 2.59    | 0.27    |
| GAIF01004178.1 | 0       | 0       | 0      | 0.01    | 0       | 0       |
| GAIF01004179.1 | 68.78   | 9.3     | 44.28  | 38.63   | 27.59   | 151.06  |
| GAIF01004183.1 | 4.54    | 2.41    | 1.93   | 6.79    | 9.23    | 3.26    |
| GAIF01004184.1 | 2581.08 | 1376.95 | 633.74 | 1864.59 | 2109.47 | 5352.67 |
| GAIF01004185.1 | 0.21    | 0.12    | 0.33   | 0.26    | 0.66    | 0.97    |
| GAIF01004186.1 | 3.49    | 5.94    | 2.07   | 24.1    | 35.64   | 0.71    |
| GAIF01004189.1 | 0.02    | 0.23    | 0      | 0.16    | 0.26    | 0       |
| GAIF01004190.1 | 1.01    | 0.18    | 0      | 8.38    | 27.85   | 2.59    |
| GAIF01004191.1 | 0       | 0       | 0.15   | 0       | 0       | 0.3     |
| GAIF01004192.1 | 17.42   | 26.94   | 13.74  | 22.16   | 10.71   | 3.98    |
| GAIF01004193.1 | 17.46   | 14.45   | 14.44  | 54.12   | 60.47   | 21.04   |
| GAIF01004194.1 | 0       | 0       | 0      | 0.35    | 1.09    | 0       |
| GAIF01004195.1 | 11.04   | 21.85   | 13.4   | 13.99   | 15.32   | 2.08    |
| GAIF01004196.1 | 0.43    | 4.26    | 0      | 6.53    | 12.71   | 0       |
| GAIF01004198.1 | 32.01   | 17.87   | 20.07  | 24.76   | 27.6    | 73.78   |
| GAIF01004200.1 | 3.19    | 1.73    | 0.97   | 7.75    | 17.06   | 2.47    |
| GAIF01004201.1 | 0       | 0.41    | 0.48   | 0       | 0.07    | 0.27    |
| GAIF01004203.1 | 57.25   | 31.62   | 16.02  | 63.96   | 36.03   | 7.56    |
| GAIF01004204.1 | 0.07    | 0       | 0      | 0.25    | 0.8     | 0.75    |
| GAIF01004205.1 | 0.08    | 0.09    | 0      | 0.36    | 0.38    | 0       |

|                |        |        |        |        |        |        |
|----------------|--------|--------|--------|--------|--------|--------|
| GAIF01004208.1 | 1.7    | 1.01   | 0.51   | 2.69   | 4.46   | 1.36   |
| GAIF01004209.1 | 5.48   | 7.32   | 6.52   | 13.08  | 13.55  | 2.2    |
| GAIF01004210.1 | 0      | 0      | 0      | 0      | 0.4    | 0.25   |
| GAIF01004212.1 | 2.39   | 4.02   | 2      | 2.42   | 0.31   | 0.06   |
| GAIF01004213.1 | 26.01  | 14.88  | 20.67  | 5.18   | 2.1    | 2.03   |
| GAIF01004214.1 | 8.67   | 14.88  | 16.78  | 13.27  | 9.97   | 5.66   |
| GAIF01004215.1 | 0.13   | 0.1    | 0      | 0      | 1.43   | 0      |
| GAIF01004221.1 | 0      | 0      | 0      | 0.1    | 0      | 0.1    |
| GAIF01004222.1 | 0      | 0      | 0      | 0      | 0.04   | 0      |
| GAIF01004223.1 | 0.11   | 0.31   | 0.12   | 0.54   | 1.24   | 0.04   |
| GAIF01004224.1 | 0.03   | 0      | 0      | 0.08   | 0.61   | 0.04   |
| GAIF01004226.1 | 0.73   | 0      | 0.33   | 2.11   | 6.78   | 0.29   |
| GAIF01004227.1 | 0.61   | 0.11   | 0.12   | 0.33   | 0.33   | 0.23   |
| GAIF01004230.1 | 0      | 0.21   | 0      | 0      | 0      | 0      |
| GAIF01004231.1 | 0.78   | 0.49   | 0.78   | 0.45   | 0.08   | 0.07   |
| GAIF01004232.1 | 14.49  | 6.63   | 4.57   | 23.62  | 33.19  | 16.33  |
| GAIF01004233.1 | 0      | 0      | 0      | 0.73   | 2.42   | 0.34   |
| GAIF01004234.1 | 0      | 0.03   | 0      | 0      | 0      | 0      |
| GAIF01004237.1 | 0      | 0      | 0      | 0      | 0.15   | 0      |
| GAIF01004238.1 | 66.21  | 46.08  | 48.13  | 57.81  | 0      | 16.12  |
| GAIF01004240.1 | 0      | 0      | 0      | 0.31   | 0.64   | 0.15   |
| GAIF01004241.1 | 0.11   | 0      | 0      | 0      | 0.63   | 0      |
| GAIF01004243.1 | 15.86  | 25.41  | 19.04  | 2.74   | 5.42   | 5.06   |
| GAIF01004245.1 | 12.73  | 7.51   | 8.75   | 23.6   | 22     | 14.17  |
| GAIF01004246.1 | 0      | 1.55   | 2.03   | 0      | 0      | 0.09   |
| GAIF01004247.1 | 10.56  | 25.31  | 13.04  | 18.7   | 20.06  | 1.87   |
| GAIF01004248.1 | 0.41   | 0.21   | 0      | 0      | 0.24   | 0      |
| GAIF01004249.1 | 1.3    | 2.4    | 0.43   | 3.08   | 4.08   | 0.12   |
| GAIF01004250.1 | 3.42   | 0.67   | 0.06   | 8.12   | 31.77  | 4.9    |
| GAIF01004252.1 | 2.01   | 2.28   | 2.01   | 3.85   | 0.42   | 1.83   |
| GAIF01004253.1 | 1.15   | 1.12   | 0      | 3.86   | 7.44   | 0      |
| GAIF01004254.1 | 0      | 0      | 0      | 0.62   | 0.33   | 0      |
| GAIF01004257.1 | 0      | 2.17   | 0.14   | 0      | 0      | 0      |
| GAIF01004258.1 | 0.13   | 12.72  | 0      | 17.63  | 11.89  | 4.07   |
| GAIF01004259.1 | 23.62  | 16.05  | 14.69  | 25.38  | 21.86  | 7.52   |
| GAIF01004263.1 | 0.55   | 0      | 0.36   | 6.34   | 20.88  | 0.18   |
| GAIF01004264.1 | 0      | 0.06   | 0      | 0.08   | 0.3    | 0      |
| GAIF01004265.1 | 0      | 0      | 0      | 0      | 0.07   | 0      |
| GAIF01004266.1 | 0.42   | 0      | 0      | 3.85   | 29.32  | 0.14   |
| GAIF01004269.1 | 0.35   | 0      | 0      | 0.82   | 2.98   | 0      |
| GAIF01004271.1 | 0      | 0      | 0      | 0      | 0.66   | 0      |
| GAIF01004272.1 | 257.67 | 166.33 | 138.63 | 176.13 | 241.32 | 339.68 |
| GAIF01004274.1 | 0      | 0.05   | 0      | 0      | 0      | 0      |
| GAIF01004275.1 | 18.73  | 13.22  | 14.43  | 26.78  | 18.06  | 20.8   |

|                |        |        |        |        |        |        |
|----------------|--------|--------|--------|--------|--------|--------|
| GAIF01004276.1 | 0      | 0      | 0      | 0.14   | 0      | 0      |
| GAIF01004277.1 | 31.32  | 71.08  | 112.06 | 57.27  | 59.86  | 18.4   |
| GAIF01004279.1 | 0      | 0      | 0      | 0.88   | 2.27   | 0      |
| GAIF01004280.1 | 312.71 | 332.91 | 406.79 | 13.25  | 10.51  | 10.69  |
| GAIF01004281.1 | 261.03 | 318.89 | 212.43 | 567.15 | 429.32 | 95.09  |
| GAIF01004282.1 | 0      | 0      | 0      | 0.57   | 1.77   | 0.09   |
| GAIF01004283.1 | 0      | 0      | 0      | 0.09   | 0      | 0      |
| GAIF01004284.1 | 167.45 | 102.55 | 94.09  | 269.9  | 112.41 | 88.09  |
| GAIF01004285.1 | 0      | 0      | 0      | 0.05   | 0.43   | 0      |
| GAIF01004287.1 | 0      | 0      | 0      | 0      | 1.47   | 0.71   |
| GAIF01004289.1 | 16.5   | 19.73  | 29.03  | 46.48  | 27.62  | 19.89  |
| GAIF01004290.1 | 13.95  | 6.57   | 0.84   | 22.45  | 21.57  | 6.07   |
| GAIF01004291.1 | 0.02   | 0.02   | 0.02   | 0.07   | 0.43   | 0      |
| GAIF01004292.1 | 0.12   | 0.25   | 0.25   | 0      | 0.28   | 0      |
| GAIF01004295.1 | 0.11   | 0      | 0      | 1.6    | 10.52  | 0.06   |
| GAIF01004296.1 | 732.97 | 578.07 | 560.75 | 455.11 | 297.98 | 222.32 |
| GAIF01004297.1 | 0.12   | 0.04   | 0.09   | 0.43   | 2.06   | 0      |
| GAIF01004298.1 | 29.23  | 20.39  | 12.99  | 64.33  | 118.85 | 31.46  |
| GAIF01004299.1 | 32.26  | 0      | 0      | 89.86  | 95.46  | 13.6   |
| GAIF01004300.1 | 0      | 0      | 0      | 0.09   | 0.18   | 0      |
| GAIF01004301.1 | 12.64  | 9.87   | 9.97   | 30.04  | 22.57  | 12.84  |
| GAIF01004302.1 | 0      | 0      | 0      | 4.47   | 0      | 0.13   |
| GAIF01004305.1 | 0      | 0.43   | 0.22   | 0.09   | 0      | 0.04   |
| GAIF01004306.1 | 114.25 | 61.1   | 58.54  | 96.23  | 72.08  | 51.61  |
| GAIF01004307.1 | 0      | 0      | 0      | 0      | 0.14   | 0      |
| GAIF01004308.1 | 87.22  | 143.44 | 165.24 | 111.21 | 100.32 | 107.94 |
| GAIF01004309.1 | 0      | 0.11   | 0.06   | 0      | 0      | 0      |
| GAIF01004310.1 | 1.47   | 4.53   | 0.6    | 33.82  | 30.76  | 12.07  |
| GAIF01004311.1 | 1.51   | 0.62   | 0.09   | 1.99   | 2.61   | 0.19   |
| GAIF01004312.1 | 3.74   | 10.77  | 4.96   | 12.1   | 30.73  | 0.67   |
| GAIF01004314.1 | 3.59   | 0      | 0      | 18.55  | 35.63  | 13.92  |
| GAIF01004315.1 | 20.78  | 11.06  | 6.67   | 50.23  | 62.32  | 7.74   |
| GAIF01004316.1 | 0.38   | 0      | 0      | 0.22   | 0      | 0      |
| GAIF01004317.1 | 0      | 0      | 0      | 0.1    | 0.4    | 0      |
| GAIF01004318.1 | 0.23   | 0      | 0.09   | 1      | 2.47   | 1.12   |
| GAIF01004319.1 | 0      | 0      | 0      | 0      | 0      | 0.05   |
| GAIF01004320.1 | 0.44   | 0.18   | 0.18   | 1.79   | 9.53   | 1.39   |
| GAIF01004321.1 | 1.86   | 1.82   | 1.41   | 5.92   | 11.38  | 0.3    |
| GAIF01004324.1 | 3.41   | 3.61   | 4.44   | 9.88   | 9.71   | 2.43   |
| GAIF01004325.1 | 0      | 0      | 0      | 0.14   | 0.3    | 0      |
| GAIF01004326.1 | 0      | 0      | 0      | 0      | 0      | 0.21   |
| GAIF01004327.1 | 0      | 0      | 0      | 0.16   | 0.83   | 0.15   |
| GAIF01004329.1 | 28.65  | 25.96  | 15.88  | 36.34  | 16.89  | 4.8    |
| GAIF01004331.1 | 0.12   | 0      | 0.17   | 0.05   | 0.14   | 0      |

|                |        |        |        |        |        |        |
|----------------|--------|--------|--------|--------|--------|--------|
| GAIF01004332.1 | 4.07   | 1.54   | 5.08   | 4.52   | 28.05  | 5.62   |
| GAIF01004333.1 | 7.94   | 5.2    | 1.31   | 25.41  | 38.8   | 3.74   |
| GAIF01004334.1 | 1.74   | 0.82   | 0.22   | 6.68   | 7.13   | 0.08   |
| GAIF01004335.1 | 0.22   | 0.31   | 0      | 1.03   | 7.77   | 0      |
| GAIF01004336.1 | 17.81  | 12.23  | 17.5   | 56.51  | 81.5   | 22.57  |
| GAIF01004337.1 | 0.65   | 0.24   | 0.08   | 1.9    | 4.32   | 0.08   |
| GAIF01004338.1 | 0.14   | 0      | 0      | 0      | 0      | 0      |
| GAIF01004339.1 | 0.14   | 0.25   | 0.62   | 0      | 2.08   | 0.12   |
| GAIF01004341.1 | 0.19   | 0.63   | 0      | 0.66   | 0.66   | 0.55   |
| GAIF01004342.1 | 62.91  | 69.99  | 51.21  | 133.05 | 155.38 | 125.39 |
| GAIF01004343.1 | 0.35   | 0.29   | 0.34   | 0.63   | 1.44   | 1.62   |
| GAIF01004344.1 | 2.21   | 1.36   | 1.12   | 2.03   | 3.36   | 0.3    |
| GAIF01004345.1 | 0      | 0      | 0      | 0      | 0      | 0.13   |
| GAIF01004346.1 | 22.93  | 18.49  | 23.79  | 61.43  | 71.78  | 30.46  |
| GAIF01004349.1 | 21.98  | 14.74  | 10.27  | 50.83  | 41.99  | 2.23   |
| GAIF01004351.1 | 28.45  | 10.27  | 12.97  | 8.62   | 4.51   | 1.22   |
| GAIF01004355.1 | 8.21   | 12.95  | 6.72   | 22.81  | 29.14  | 1.78   |
| GAIF01004356.1 | 0      | 0.07   | 0.03   | 0      | 0.28   | 0      |
| GAIF01004359.1 | 0      | 0      | 0      | 0      | 0.15   | 0      |
| GAIF01004360.1 | 7.77   | 9.55   | 7.09   | 9.02   | 10.21  | 3.17   |
| GAIF01004362.1 | 265.42 | 447.68 | 351.75 | 262.41 | 249.7  | 110.01 |
| GAIF01004364.1 | 6.8    | 2.11   | 2.77   | 14.74  | 21.43  | 35.13  |
| GAIF01004366.1 | 0.05   | 0.05   | 0.05   | 0.04   | 0.17   | 0      |
| GAIF01004369.1 | 0      | 0      | 1.01   | 0      | 0      | 0.13   |
| GAIF01004370.1 | 69.57  | 46.6   | 34.45  | 15.4   | 6.68   | 4.74   |
| GAIF01004372.1 | 0      | 0      | 0      | 0      | 0.07   | 0      |
| GAIF01004373.1 | 2.34   | 0      | 0      | 0.36   | 0      | 0      |
| GAIF01004374.1 | 3.68   | 1.22   | 0      | 10.41  | 11.17  | 0.35   |
| GAIF01004375.1 | 3.85   | 3.14   | 1.58   | 5.72   | 13.29  | 9.93   |
| GAIF01004376.1 | 0      | 0      | 0      | 4.54   | 20.4   | 0.42   |
| GAIF01004377.1 | 12.09  | 12.33  | 15.91  | 48.04  | 44.01  | 12.23  |
| GAIF01004381.1 | 0      | 0      | 0      | 0.36   | 0.98   | 0      |
| GAIF01004382.1 | 1.63   | 0.62   | 0.23   | 3.95   | 11.92  | 0.47   |
| GAIF01004383.1 | 0.15   | 0.08   | 0.25   | 0.04   | 0.11   | 0.17   |
| GAIF01004384.1 | 5.19   | 9.48   | 7.97   | 14.09  | 8.61   | 2.06   |
| GAIF01004385.1 | 5.28   | 3.53   | 3.19   | 14.19  | 22.73  | 2.65   |
| GAIF01004386.1 | 1.51   | 1.03   | 0.21   | 1.97   | 0.91   | 0      |
| GAIF01004387.1 | 0.07   | 0      | 0      | 0.08   | 0      | 0      |
| GAIF01004388.1 | 0.22   | 0      | 0      | 0.75   | 7.34   | 0.17   |
| GAIF01004389.1 | 75.51  | 71.95  | 80.63  | 31.27  | 14.89  | 15.81  |
| GAIF01004390.1 | 0      | 0.06   | 0      | 0.07   | 0.81   | 0.06   |
| GAIF01004391.1 | 0.1    | 0.03   | 0      | 0.06   | 0.01   | 0      |
| GAIF01004393.1 | 23.6   | 26.51  | 10.77  | 48.01  | 60.32  | 3.01   |
| GAIF01004395.1 | 0.42   | 0.43   | 0      | 0.28   | 0      | 0      |

|                |       |       |       |       |       |        |
|----------------|-------|-------|-------|-------|-------|--------|
| GAIF01004396.1 | 1.22  | 0.93  | 1.47  | 6.07  | 8.33  | 0.54   |
| GAIF01004398.1 | 2.86  | 8.04  | 3.13  | 4.17  | 8.62  | 0.89   |
| GAIF01004402.1 | 0.01  | 0.06  | 0.17  | 0.42  | 0.94  | 0.09   |
| GAIF01004404.1 | 0.16  | 1.23  | 2.42  | 0.68  | 0.58  | 2.9    |
| GAIF01004405.1 | 6.78  | 7.21  | 3.18  | 7.28  | 4.85  | 2.56   |
| GAIF01004406.1 | 7.23  | 6.64  | 13.97 | 16.54 | 15.71 | 9.07   |
| GAIF01004407.1 | 2.82  | 0.58  | 0.13  | 3.1   | 11.6  | 9.45   |
| GAIF01004408.1 | 5.23  | 4.8   | 4.56  | 10.54 | 8.86  | 8.26   |
| GAIF01004409.1 | 4.96  | 2.06  | 4.08  | 2.05  | 1.9   | 5.49   |
| GAIF01004410.1 | 0.06  | 0.12  | 0     | 0     | 1     | 0      |
| GAIF01004411.1 | 0.09  | 0.19  | 0     | 0.1   | 0.41  | 0      |
| GAIF01004412.1 | 0.16  | 0     | 0.06  | 0     | 0     | 0      |
| GAIF01004414.1 | 0.69  | 0     | 0     | 0.4   | 1.1   | 0      |
| GAIF01004415.1 | 4.32  | 9.14  | 0.91  | 6.89  | 27.3  | 0      |
| GAIF01004416.1 | 0     | 0     | 0.09  | 0     | 0.1   | 0      |
| GAIF01004417.1 | 0     | 0     | 0.09  | 0     | 0     | 0      |
| GAIF01004419.1 | 7.85  | 8.19  | 15.44 | 4.01  | 6.08  | 16.79  |
| GAIF01004421.1 | 0.21  | 0.11  | 0     | 0.24  | 0.5   | 0      |
| GAIF01004422.1 | 0     | 0     | 0     | 0     | 0     | 0.25   |
| GAIF01004423.1 | 34.31 | 25.33 | 12.93 | 31.3  | 37.55 | 6.81   |
| GAIF01004424.1 | 26.93 | 27.19 | 21.69 | 35.54 | 28.78 | 4.53   |
| GAIF01004425.1 | 0     | 0     | 0     | 0.28  | 0.94  | 0.1    |
| GAIF01004426.1 | 0.92  | 1.35  | 0.93  | 0.67  | 0.68  | 0.24   |
| GAIF01004428.1 | 0.6   | 0.54  | 0.22  | 1.85  | 2.51  | 0.22   |
| GAIF01004429.1 | 3.74  | 0.69  | 1.67  | 2.47  | 1.32  | 1.89   |
| GAIF01004430.1 | 7.05  | 8.68  | 12.32 | 28.05 | 16.69 | 15.29  |
| GAIF01004431.1 | 5.04  | 3.85  | 9.38  | 3.5   | 0.2   | 1.42   |
| GAIF01004432.1 | 0.48  | 0     | 0     | 0     | 0.14  | 0      |
| GAIF01004433.1 | 0     | 0     | 0     | 0     | 0.08  | 0      |
| GAIF01004434.1 | 17.83 | 12.29 | 9.96  | 57.49 | 52.74 | 10.87  |
| GAIF01004436.1 | 11.91 | 21.95 | 22.41 | 53.17 | 30.96 | 7.12   |
| GAIF01004437.1 | 6.94  | 10.41 | 11.45 | 7.65  | 7.94  | 6.93   |
| GAIF01004439.1 | 0     | 0.35  | 0     | 0     | 0     | 1.04   |
| GAIF01004441.1 | 0.02  | 0.02  | 0     | 0.06  | 1.24  | 0      |
| GAIF01004442.1 | 2.35  | 3.65  | 1.48  | 10.46 | 8.74  | 0.86   |
| GAIF01004443.1 | 0.13  | 0.04  | 0     | 0     | 0.12  | 0.04   |
| GAIF01004444.1 | 98.87 | 40.35 | 49.83 | 78.59 | 49.69 | 187.42 |
| GAIF01004445.1 | 3.97  | 1.94  | 0.53  | 1.35  | 4.12  | 2.94   |
| GAIF01004447.1 | 11.16 | 3.63  | 0     | 40.14 | 42.34 | 2.46   |
| GAIF01004448.1 | 0     | 0     | 0     | 0.22  | 0     | 0      |
| GAIF01004450.1 | 0     | 0     | 0     | 0.06  | 0.39  | 0.06   |
| GAIF01004451.1 | 0     | 0     | 0     | 0.07  | 0     | 0      |
| GAIF01004452.1 | 0     | 0     | 0     | 0     | 0.58  | 0      |
| GAIF01004453.1 | 1.05  | 0.76  | 1.67  | 2.31  | 1.13  | 1.03   |



|                |       |       |       |       |       |       |
|----------------|-------|-------|-------|-------|-------|-------|
| GAIF01004454.1 | 6.98  | 1.08  | 0.14  | 3.18  | 7.35  | 0.27  |
| GAIF01004455.1 | 6.17  | 3.72  | 1.61  | 10.64 | 19.71 | 9.64  |
| GAIF01004456.1 | 15.4  | 14.07 | 14.66 | 32.48 | 51.56 | 42.61 |
| GAIF01004457.1 | 0     | 0     | 0.05  | 0.01  | 0     | 0     |
| GAIF01004458.1 | 1.45  | 2.1   | 1.13  | 2.14  | 3.74  | 0.73  |
| GAIF01004461.1 | 0     | 0.09  | 0.16  | 0     | 0     | 0.21  |
| GAIF01004462.1 | 0.06  | 0.06  | 0     | 0     | 0     | 0     |
| GAIF01004463.1 | 10.37 | 10.99 | 6.44  | 2.55  | 1.89  | 0.69  |
| GAIF01004464.1 | 0     | 0.24  | 0.97  | 0     | 0     | 1.05  |
| GAIF01004466.1 | 2.1   | 0.74  | 0.89  | 1.02  | 2.69  | 0.07  |
| GAIF01004468.1 | 0     | 0.08  | 0     | 0     | 0     | 0     |
| GAIF01004470.1 | 0.36  | 0     | 0.08  | 1.09  | 0.64  | 2.25  |
| GAIF01004472.1 | 35.68 | 20.84 | 14.36 | 32.32 | 64.18 | 10.51 |
| GAIF01004473.1 | 33.07 | 19.17 | 26.38 | 40.89 | 40.75 | 76.26 |
| GAIF01004474.1 | 1.11  | 1.62  | 0.83  | 0.29  | 0.16  | 0     |
| GAIF01004475.1 | 0.2   | 0     | 0     | 0     | 2.89  | 0     |
| GAIF01004476.1 | 0     | 0     | 0     | 0.07  | 0     | 0     |
| GAIF01004478.1 | 0.01  | 0     | 0.03  | 0     | 0.94  | 0     |
| GAIF01004479.1 | 0.11  | 0     | 0     | 0.07  | 0.23  | 0     |
| GAIF01004480.1 | 12.74 | 15.08 | 20.88 | 89.17 | 54.09 | 34.78 |
| GAIF01004482.1 | 0.2   | 0.39  | 0.06  | 0.06  | 0.25  | 0     |
| GAIF01004483.1 | 0     | 0     | 0.07  | 0     | 0.08  | 0     |
| GAIF01004484.1 | 13.76 | 32.94 | 23.67 | 29.32 | 11.77 | 3.35  |
| GAIF01004487.1 | 1.3   | 0.29  | 0.09  | 1.86  | 3.96  | 0.23  |
| GAIF01004488.1 | 0.06  | 0     | 0     | 0     | 0     | 0     |
| GAIF01004489.1 | 10.4  | 10.96 | 10.89 | 14.3  | 10.65 | 5.29  |
| GAIF01004490.1 | 34.37 | 35.81 | 50.83 | 80.74 | 36.74 | 35.38 |
| GAIF01004491.1 | 0.29  | 0.08  | 0     | 1.66  | 7.14  | 0.63  |
| GAIF01004495.1 | 0     | 0.1   | 0     | 0     | 0.03  | 0     |
| GAIF01004497.1 | 12.25 | 10.9  | 5.17  | 2.92  | 0.94  | 0.21  |
| GAIF01004498.1 | 0.09  | 0.05  | 0.05  | 0.05  | 0.34  | 0     |
| GAIF01004499.1 | 0     | 0.43  | 0.22  | 0     | 0     | 0     |
| GAIF01004500.1 | 0     | 0     | 0     | 0.43  | 1.22  | 0     |
| GAIF01004501.1 | 2.9   | 0.92  | 0.13  | 10.95 | 13.09 | 0.67  |
| GAIF01004503.1 | 0.66  | 0     | 0.22  | 0.12  | 0.42  | 0.55  |
| GAIF01004504.1 | 0.37  | 0     | 0     | 1.16  | 9.73  | 0     |
| GAIF01004505.1 | 6.63  | 13.07 | 13.58 | 4.82  | 3.19  | 2.34  |
| GAIF01004506.1 | 4.01  | 2.18  | 3.96  | 16.74 | 37.74 | 2.35  |
| GAIF01004507.1 | 0.38  | 0.46  | 0.21  | 1.97  | 5.85  | 0.1   |
| GAIF01004509.1 | 2.05  | 1.07  | 0.45  | 13.23 | 15.09 | 0.54  |
| GAIF01004511.1 | 0     | 0     | 0.22  | 0     | 0.25  | 0     |
| GAIF01004512.1 | 43.16 | 16.78 | 16.18 | 25.35 | 33.44 | 29.71 |
| GAIF01004514.1 | 42.42 | 27    | 31.64 | 44.3  | 42.13 | 33.35 |
| GAIF01004515.1 | 34.05 | 0     | 0     | 0     | 18.29 | 42.12 |

|                |         |         |         |         |         |         |
|----------------|---------|---------|---------|---------|---------|---------|
| GAIF01004517.1 | 0.5     | 0.41    | 0       | 3.61    | 14.66   | 0.96    |
| GAIF01004518.1 | 26.82   | 25.53   | 19.72   | 29.11   | 37.87   | 22.14   |
| GAIF01004519.1 | 562.74  | 4.28    | 23.62   | 9.13    | 1.51    | 0.83    |
| GAIF01004520.1 | 0.09    | 0.4     | 0.11    | 0.65    | 1.05    | 0.05    |
| GAIF01004521.1 | 15.46   | 19.25   | 13.93   | 39.25   | 43.49   | 25.93   |
| GAIF01004524.1 | 19.99   | 37.34   | 35.59   | 21.39   | 52.69   | 16.86   |
| GAIF01004525.1 | 0.08    | 0       | 0       | 0       | 0       | 0.09    |
| GAIF01004526.1 | 0       | 0       | 0       | 1.72    | 7.63    | 0.39    |
| GAIF01004527.1 | 6.91    | 12.4    | 10.29   | 32.59   | 23.72   | 4.85    |
| GAIF01004528.1 | 5.8     | 9.56    | 5.6     | 0.2     | 0       | 0.46    |
| GAIF01004529.1 | 2.11    | 3.94    | 5.92    | 6.55    | 4.46    | 0.28    |
| GAIF01004530.1 | 0       | 0       | 0       | 0       | 0.17    | 0       |
| GAIF01004531.1 | 0.15    | 0       | 0       | 1.19    | 2.98    | 1.29    |
| GAIF01004532.1 | 4732.92 | 1172.48 | 2414.16 | 5832.03 | 5473.43 | 5592.56 |
| GAIF01004533.1 | 0.67    | 1.62    | 0.08    | 0.95    | 0.81    | 0       |
| GAIF01004534.1 | 0       | 0.22    | 0.22    | 0       | 0.32    | 0.15    |
| GAIF01004535.1 | 0       | 0.21    | 0       | 0       | 0.24    | 0       |
| GAIF01004537.1 | 0.84    | 0.33    | 0       | 0.79    | 0.65    | 0.08    |
| GAIF01004538.1 | 0.03    | 0.06    | 0.06    | 0       | 0       | 0       |
| GAIF01004539.1 | 2.56    | 5.56    | 4.92    | 5.14    | 2.69    | 1.03    |
| GAIF01004542.1 | 21.93   | 8.71    | 16.13   | 37.64   | 58.13   | 152.18  |
| GAIF01004543.1 | 30.16   | 41.71   | 52.87   | 47.51   | 44.21   | 24.36   |
| GAIF01004545.1 | 14.81   | 21.79   | 16.94   | 26.14   | 10.35   | 4.02    |
| GAIF01004549.1 | 22.06   | 34.02   | 36.72   | 23.93   | 11.1    | 10.97   |
| GAIF01004550.1 | 9.39    | 11.03   | 11.55   | 23.87   | 26.99   | 4.76    |
| GAIF01004551.1 | 0       | 0.03    | 0       | 0       | 0       | 0       |
| GAIF01004552.1 | 17.31   | 17.99   | 3.55    | 94.79   | 142.49  | 4.54    |
| GAIF01004554.1 | 0       | 0       | 0       | 0.22    | 0.41    | 0       |
| GAIF01004555.1 | 1.1     | 0       | 0       | 3.48    | 12.51   | 0       |
| GAIF01004557.1 | 0       | 0.22    | 0.22    | 0       | 0       | 0.07    |
| GAIF01004558.1 | 10.01   | 13.44   | 4.68    | 27.19   | 41.11   | 1.84    |
| GAIF01004559.1 | 0       | 0       | 0       | 0       | 0       | 0.43    |
| GAIF01004560.1 | 0       | 0       | 0       | 0.06    | 0       | 0       |
| GAIF01004561.1 | 22.51   | 15.56   | 24.47   | 40.58   | 35.87   | 23.51   |
| GAIF01004562.1 | 9.54    | 2.04    | 0.34    | 0.91    | 0       | 0.17    |
| GAIF01004563.1 | 14.79   | 29.22   | 21.57   | 29.62   | 19.69   | 9.21    |
| GAIF01004565.1 | 0.82    | 0       | 0.08    | 3.82    | 15.99   | 0.26    |
| GAIF01004566.1 | 0.15    | 0       | 0.05    | 0       | 0.38    | 0       |
| GAIF01004567.1 | 4.67    | 6.96    | 10.23   | 11.2    | 7.98    | 3.48    |
| GAIF01004569.1 | 0       | 0       | 0       | 0.01    | 0.39    | 0       |
| GAIF01004571.1 | 119.35  | 113.48  | 118.95  | 104.35  | 55.02   | 41.51   |
| GAIF01004572.1 | 0.31    | 0.08    | 0.6     | 0       | 0       | 0       |
| GAIF01004574.1 | 0       | 0       | 0       | 0.07    | 0.57    | 0       |
| GAIF01004575.1 | 0       | 8.17    | 2.11    | 0       | 0       | 0.35    |

|                |        |        |        |        |        |        |
|----------------|--------|--------|--------|--------|--------|--------|
| GAIF01004576.1 | 0      | 1.47   | 0.25   | 0.98   | 0.9    | 0      |
| GAIF01004577.1 | 0.43   | 0.31   | 0      | 0      | 0      | 0      |
| GAIF01004579.1 | 0.11   | 0.1    | 0.02   | 0.5    | 1.8    | 0.07   |
| GAIF01004582.1 | 0.14   | 0.15   | 0      | 0.31   | 0.33   | 0      |
| GAIF01004583.1 | 235.18 | 248.68 | 237.82 | 152.76 | 62.23  | 58.78  |
| GAIF01004584.1 | 18.36  | 30.19  | 23.86  | 50.81  | 44.85  | 10.57  |
| GAIF01004585.1 | 0.83   | 1.09   | 2.38   | 1.35   | 2.61   | 0.37   |
| GAIF01004588.1 | 30.25  | 20.01  | 0      | 18.27  | 8.71   | 0      |
| GAIF01004589.1 | 2.1    | 0.73   | 1.36   | 0.89   | 2.41   | 2.73   |
| GAIF01004590.1 | 0      | 0      | 0      | 0.24   | 1.37   | 0      |
| GAIF01004591.1 | 0.28   | 0.1    | 0      | 0      | 0.56   | 0.1    |
| GAIF01004592.1 | 13.63  | 8.35   | 13.99  | 19.88  | 20.28  | 42.35  |
| GAIF01004593.1 | 0      | 0.2    | 0.2    | 0.77   | 0.47   | 0      |
| GAIF01004594.1 | 0.21   | 0      | 0      | 0.08   | 0      | 0      |
| GAIF01004595.1 | 0.92   | 1.52   | 3.86   | 1.38   | 3.51   | 0.22   |
| GAIF01004596.1 | 0.01   | 0.12   | 0      | 1.08   | 2.76   | 0      |
| GAIF01004600.1 | 0.54   | 0.17   | 0.08   | 2.33   | 5.84   | 0.17   |
| GAIF01004601.1 | 0      | 0      | 0      | 0      | 0      | 171.25 |
| GAIF01004602.1 | 10.84  | 18.19  | 8.06   | 1.52   | 0.58   | 0.05   |
| GAIF01004604.1 | 1.04   | 1.01   | 0.45   | 0.59   | 1.08   | 0.82   |
| GAIF01004605.1 | 0.04   | 0.01   | 0      | 0      | 0.08   | 0      |
| GAIF01004607.1 | 9.22   | 6.4    | 6.48   | 3.77   | 3.88   | 5.39   |
| GAIF01004610.1 | 0      | 0      | 0      | 0      | 0.95   | 0      |
| GAIF01004611.1 | 0.26   | 0.29   | 0      | 1.98   | 5.69   | 0.29   |
| GAIF01004613.1 | 37.88  | 53.25  | 37.36  | 69.54  | 32.74  | 10.92  |
| GAIF01004614.1 | 0      | 0      | 0.13   | 0      | 0      | 0      |
| GAIF01004615.1 | 0.11   | 0      | 0      | 0      | 0.14   | 0      |
| GAIF01004616.1 | 0.06   | 0      | 0      | 0.38   | 2.32   | 0.03   |
| GAIF01004618.1 | 2.16   | 0.31   | 0.16   | 0.33   | 0.52   | 0.32   |
| GAIF01004619.1 | 18.13  | 16.93  | 39.54  | 39.59  | 19.51  | 35.43  |
| GAIF01004620.1 | 0      | 0      | 0      | 0.01   | 0      | 0      |
| GAIF01004622.1 | 2.79   | 1.06   | 1.23   | 7.46   | 3.36   | 1.85   |
| GAIF01004623.1 | 6.2    | 6.58   | 5.76   | 23.4   | 19.2   | 1.84   |
| GAIF01004625.1 | 0.09   | 0.31   | 0      | 0.33   | 0.23   | 0.1    |
| GAIF01004626.1 | 0.53   | 0.08   | 0      | 0.56   | 2.03   | 0.14   |
| GAIF01004628.1 | 0      | 0.05   | 0.05   | 0.18   | 0      | 0      |
| GAIF01004629.1 | 0      | 0      | 0      | 1.17   | 1.55   | 0      |
| GAIF01004630.1 | 20.16  | 23.69  | 16.44  | 26.9   | 24.3   | 4.65   |
| GAIF01004632.1 | 0.94   | 0.67   | 0.55   | 0.37   | 0.63   | 0.4    |
| GAIF01004635.1 | 5.17   | 7.29   | 3.38   | 3.37   | 1.96   | 0.5    |
| GAIF01004636.1 | 304.79 | 359.1  | 430.41 | 167.82 | 150.35 | 319.01 |
| GAIF01004637.1 | 21.24  | 38.45  | 44.04  | 62.02  | 32.21  | 16.29  |
| GAIF01004638.1 | 1.26   | 0.24   | 0.24   | 1.8    | 4.18   | 1.79   |
| GAIF01004639.1 | 2.87   | 0.59   | 0.9    | 6.6    | 1.57   | 0.9    |

|                |         |        |        |         |         |        |
|----------------|---------|--------|--------|---------|---------|--------|
| GAIF01004641.1 | 0.63    | 0.69   | 0.26   | 11.58   | 43.6    | 0      |
| GAIF01004642.1 | 11.64   | 9.47   | 14.92  | 34.72   | 26.36   | 19.35  |
| GAIF01004643.1 | 10.62   | 10.99  | 11.33  | 13.16   | 13.39   | 4.39   |
| GAIF01004644.1 | 2.91    | 0.61   | 0.15   | 3.85    | 9.11    | 1.25   |
| GAIF01004645.1 | 6.09    | 6.25   | 10.69  | 7.46    | 3.25    | 12.07  |
| GAIF01004646.1 | 0.12    | 0.07   | 0      | 0.21    | 0.44    | 0      |
| GAIF01004647.1 | 26.68   | 30.77  | 23.48  | 58.3    | 37.03   | 11.67  |
| GAIF01004648.1 | 0       | 0.04   | 0      | 0       | 0.08    | 0      |
| GAIF01004649.1 | 11.98   | 13.12  | 20.17  | 38.25   | 28.91   | 13     |
| GAIF01004650.1 | 0.27    | 0      | 0      | 1.03    | 6.72    | 0      |
| GAIF01004653.1 | 0       | 0      | 0      | 0       | 0.38    | 0      |
| GAIF01004656.1 | 9.71    | 9.81   | 10.33  | 9.77    | 4.93    | 2.93   |
| GAIF01004657.1 | 0       | 0      | 0      | 0.06    | 0.03    | 0      |
| GAIF01004658.1 | 0.88    | 0.32   | 0.32   | 0       | 0       | 0      |
| GAIF01004659.1 | 0.37    | 0      | 0      | 0.85    | 2.21    | 0.14   |
| GAIF01004661.1 | 5.77    | 7.4    | 5.68   | 7.21    | 16.9    | 21.52  |
| GAIF01004662.1 | 0.09    | 0.01   | 0      | 0.02    | 0.07    | 0      |
| GAIF01004664.1 | 0.1     | 0      | 0      | 0       | 0       | 0      |
| GAIF01004665.1 | 0       | 0.04   | 0      | 0.36    | 1.62    | 0.04   |
| GAIF01004666.1 | 6.23    | 8.73   | 4.75   | 0.88    | 0.52    | 0.03   |
| GAIF01004671.1 | 0       | 0.02   | 0      | 0.18    | 0.42    | 0.02   |
| GAIF01004672.1 | 25.05   | 34.26  | 30.71  | 54.96   | 32.15   | 13.27  |
| GAIF01004673.1 | 1.24    | 0.73   | 1.37   | 0.17    | 0       | 0.05   |
| GAIF01004675.1 | 0.09    | 0      | 0      | 0.93    | 5.96    | 0      |
| GAIF01004676.1 | 9.15    | 17.85  | 3.55   | 0.9     | 1.52    | 0.52   |
| GAIF01004680.1 | 0.35    | 0      | 0      | 0.27    | 0.28    | 0      |
| GAIF01004681.1 | 4.16    | 3.02   | 2.16   | 0.54    | 0.14    | 0      |
| GAIF01004682.1 | 0.06    | 0.07   | 0.04   | 0.01    | 0.05    | 0.06   |
| GAIF01004686.1 | 6.09    | 2.12   | 2.68   | 15.55   | 34.87   | 26.85  |
| GAIF01004687.1 | 0.18    | 0.06   | 1.93   | 4.63    | 1.41    | 12.29  |
| GAIF01004689.1 | 0       | 0.18   | 0.74   | 0       | 0       | 0.19   |
| GAIF01004690.1 | 0       | 0      | 0      | 0.33    | 1.5     | 0      |
| GAIF01004691.1 | 0.53    | 0.34   | 0      | 3.43    | 4.31    | 0.35   |
| GAIF01004692.1 | 0.61    | 1.33   | 0      | 2.76    | 14.25   | 0.67   |
| GAIF01004693.1 | 0       | 0      | 0      | 0       | 1.57    | 0      |
| GAIF01004694.1 | 0       | 0      | 0      | 0       | 0       | 0.07   |
| GAIF01004695.1 | 14.04   | 31.31  | 25.72  | 8.65    | 15.97   | 6.92   |
| GAIF01004696.1 | 3.7     | 4.68   | 0.68   | 5.94    | 10.73   | 0      |
| GAIF01004697.1 | 0       | 0      | 0      | 0       | 0.25    | 0      |
| GAIF01004698.1 | 19.03   | 13.3   | 18.64  | 40.96   | 31.56   | 21.36  |
| GAIF01004699.1 | 74.34   | 91.84  | 76.7   | 119.55  | 70.45   | 18.44  |
| GAIF01004700.1 | 0.3     | 0.85   | 0.13   | 2.22    | 4.75    | 0.13   |
| GAIF01004701.1 | 0       | 0      | 0.04   | 0.68    | 3.1     | 0      |
| GAIF01004703.1 | 1372.85 | 972.64 | 311.54 | 2954.74 | 3386.33 | 954.29 |

|                |       |       |        |       |       |       |
|----------------|-------|-------|--------|-------|-------|-------|
| GAIF01004704.1 | 19.72 | 20.19 | 12.52  | 79.47 | 56.3  | 14.3  |
| GAIF01004706.1 | 0.26  | 0     | 0      | 0.24  | 0.31  | 0.19  |
| GAIF01004708.1 | 17.6  | 15.7  | 11.8   | 43.58 | 37.05 | 8.49  |
| GAIF01004709.1 | 68.11 | 6.04  | 154.32 | 0.06  | 0     | 18.73 |
| GAIF01004711.1 | 0     | 0.28  | 0.19   | 0.3   | 0.61  | 0     |
| GAIF01004712.1 | 0.04  | 0.05  | 0.2    | 0.1   | 0.16  | 0     |
| GAIF01004713.1 | 0.88  | 0.18  | 0      | 2.37  | 13.42 | 0     |
| GAIF01004714.1 | 2.54  | 4.57  | 2.06   | 5.9   | 13.16 | 0.37  |
| GAIF01004715.1 | 60.1  | 31.45 | 41.78  | 69.1  | 33.44 | 35.13 |
| GAIF01004717.1 | 0.09  | 0.25  | 0.05   | 0.11  | 0.22  | 0     |
| GAIF01004718.1 | 2.75  | 0.82  | 0.27   | 13.07 | 30.71 | 0.55  |
| GAIF01004719.1 | 0     | 0     | 0      | 0     | 0.19  | 0     |
| GAIF01004722.1 | 3.04  | 0     | 0      | 0     | 0     | 0     |
| GAIF01004723.1 | 14.72 | 17.18 | 14.46  | 39.85 | 43.76 | 17.18 |
| GAIF01004724.1 | 8.34  | 6.11  | 4.42   | 12.95 | 6.16  | 5.9   |
| GAIF01004725.1 | 0.12  | 0.25  | 0      | 0.42  | 0     | 0.14  |
| GAIF01004726.1 | 0     | 0     | 0      | 0     | 0     | 0.16  |
| GAIF01004727.1 | 0     | 1.65  | 1.42   | 0     | 0     | 0.46  |
| GAIF01004729.1 | 0.06  | 0     | 0      | 0.43  | 1.66  | 0.04  |
| GAIF01004730.1 | 0     | 0.04  | 0.04   | 0.31  | 1.29  | 0     |
| GAIF01004731.1 | 0     | 1.5   | 0.61   | 0     | 0.18  | 0.11  |
| GAIF01004733.1 | 0     | 0.12  | 0      | 0.13  | 0.81  | 0.25  |
| GAIF01004735.1 | 0     | 0.67  | 0      | 0.06  | 2.33  | 0     |
| GAIF01004736.1 | 0.24  | 0     | 0.54   | 0.28  | 0.44  | 0     |
| GAIF01004737.1 | 0     | 0     | 0      | 0     | 1.01  | 0     |
| GAIF01004740.1 | 0     | 0     | 0      | 0     | 0.22  | 0     |
| GAIF01004741.1 | 35.79 | 0     | 1.26   | 21.68 | 9.35  | 7.37  |
| GAIF01004742.1 | 1.23  | 0.53  | 0      | 0.47  | 1.01  | 0.15  |
| GAIF01004743.1 | 4.31  | 4.02  | 3.94   | 0     | 5.61  | 5.61  |
| GAIF01004745.1 | 1.47  | 15.38 | 21.21  | 20.64 | 27.65 | 3.06  |
| GAIF01004747.1 | 0     | 0     | 0      | 0     | 0     | 0.42  |
| GAIF01004748.1 | 0     | 0     | 0      | 0     | 0.06  | 0     |
| GAIF01004749.1 | 0.05  | 0     | 0      | 0.2   | 2.79  | 0     |
| GAIF01004751.1 | 6.9   | 6.61  | 2.05   | 3.8   | 4.62  | 2.14  |
| GAIF01004752.1 | 0.38  | 0     | 0      | 1.61  | 5.6   | 0.28  |
| GAIF01004753.1 | 0     | 0     | 0.11   | 2.2   | 2.02  | 0     |
| GAIF01004755.1 | 0.31  | 0     | 0      | 1.23  | 2.65  | 0     |
| GAIF01004759.1 | 29.09 | 42.7  | 49.1   | 81.65 | 39.13 | 15.83 |
| GAIF01004760.1 | 6.4   | 5.06  | 1.6    | 16.21 | 37.44 | 3.05  |
| GAIF01004764.1 | 0.29  | 0.63  | 0.35   | 3.76  | 9.67  | 0.12  |
| GAIF01004766.1 | 0     | 0     | 0      | 0.03  | 0     | 0     |
| GAIF01004767.1 | 5.89  | 1.29  | 0.12   | 15.52 | 46.72 | 2.42  |
| GAIF01004768.1 | 0     | 0.16  | 0      | 0.17  | 0     | 0     |
| GAIF01004769.1 | 0     | 0     | 0      | 0     | 0.07  | 0     |

|                |        |        |        |         |         |        |
|----------------|--------|--------|--------|---------|---------|--------|
| GAIF01004770.1 | 3.6    | 3.73   | 1.59   | 12.72   | 17.24   | 0.32   |
| GAIF01004771.1 | 62.73  | 13.84  | 27.65  | 40.81   | 31.5    | 174.26 |
| GAIF01004772.1 | 0      | 0      | 0      | 0       | 0.02    | 0      |
| GAIF01004774.1 | 0      | 0      | 0      | 0.06    | 0.06    | 0      |
| GAIF01004775.1 | 0      | 0      | 0.21   | 0       | 0       | 0      |
| GAIF01004777.1 | 0.7    | 0.05   | 0.08   | 1.07    | 9.73    | 0.31   |
| GAIF01004779.1 | 0.1    | 0      | 0      | 0.06    | 0.83    | 0      |
| GAIF01004780.1 | 0.13   | 0.31   | 0.23   | 0.06    | 0.03    | 0      |
| GAIF01004781.1 | 0      | 0      | 0      | 0.16    | 0       | 0      |
| GAIF01004782.1 | 21.05  | 10.67  | 12.78  | 25.4    | 36.7    | 47.07  |
| GAIF01004783.1 | 8.88   | 1.57   | 0      | 15.36   | 21.85   | 5.69   |
| GAIF01004784.1 | 1.3    | 0.9    | 0.67   | 0.34    | 0.68    | 0.01   |
| GAIF01004786.1 | 0      | 0      | 0      | 0       | 0.24    | 0      |
| GAIF01004787.1 | 0.41   | 0.17   | 0.22   | 13.64   | 0.25    | 0.28   |
| GAIF01004788.1 | 134.82 | 85.03  | 49.52  | 186.96  | 223.41  | 22.44  |
| GAIF01004790.1 | 0      | 0.34   | 0.17   | 0.67    | 0.34    | 0      |
| GAIF01004791.1 | 0.29   | 0.04   | 0.04   | 1.04    | 5.54    | 0.55   |
| GAIF01004792.1 | 25.19  | 18.85  | 38.81  | 50.81   | 25.57   | 31.25  |
| GAIF01004793.1 | 0.05   | 0      | 0      | 0.06    | 0.25    | 0.34   |
| GAIF01004794.1 | 12.47  | 15.84  | 20.5   | 24.61   | 16.89   | 10.46  |
| GAIF01004795.1 | 0.53   | 0.29   | 0.37   | 0.23    | 0       | 0.15   |
| GAIF01004797.1 | 353.46 | 197.7  | 44.7   | 1798.33 | 1517.47 | 76.01  |
| GAIF01004798.1 | 0.12   | 0.4    | 0      | 0.29    | 0.6     | 0.27   |
| GAIF01004799.1 | 0.93   | 0.08   | 0      | 2.15    | 9.96    | 0.63   |
| GAIF01004800.1 | 0      | 0      | 0      | 0.43    | 0.15    | 0      |
| GAIF01004801.1 | 0.12   | 2.89   | 1.8    | 0       | 0.11    | 0      |
| GAIF01004802.1 | 7.62   | 5.62   | 8      | 7.31    | 10.29   | 4.4    |
| GAIF01004803.1 | 0.21   | 0      | 0.16   | 0       | 3.16    | 5.26   |
| GAIF01004804.1 | 0      | 0      | 0      | 0.43    | 2.9     | 0      |
| GAIF01004805.1 | 0.22   | 0.12   | 0      | 2.33    | 6.05    | 0.06   |
| GAIF01004806.1 | 0      | 0      | 0      | 0.18    | 0.53    | 0      |
| GAIF01004808.1 | 21.64  | 19.85  | 18.41  | 20.08   | 11.25   | 5.93   |
| GAIF01004809.1 | 0.11   | 0      | 0      | 0       | 0       | 0      |
| GAIF01004810.1 | 0      | 0      | 0.08   | 0.09    | 0.09    | 0      |
| GAIF01004813.1 | 0.05   | 0      | 0      | 0       | 0.2     | 0.06   |
| GAIF01004814.1 | 12.68  | 11.81  | 12.97  | 12.38   | 8.03    | 4.42   |
| GAIF01004815.1 | 0.25   | 0      | 0.48   | 0       | 0.31    | 0      |
| GAIF01004816.1 | 7.79   | 13.67  | 5.72   | 34.54   | 52.2    | 4.02   |
| GAIF01004818.1 | 2.69   | 3.1    | 4.42   | 1.56    | 0.2     | 1.11   |
| GAIF01004819.1 | 0      | 0.06   | 0      | 0       | 0       | 0      |
| GAIF01004821.1 | 0      | 0      | 0      | 0       | 0.27    | 0      |
| GAIF01004822.1 | 0.09   | 0      | 0      | 0       | 0       | 0      |
| GAIF01004823.1 | 272.15 | 268.17 | 215.16 | 288.01  | 340.98  | 108.89 |
| GAIF01004826.1 | 0      | 0      | 0      | 0.2     | 1.54    | 0.09   |

|                |        |        |        |        |        |        |
|----------------|--------|--------|--------|--------|--------|--------|
| GAIF01004827.1 | 0.81   | 0.48   | 1.08   | 0.72   | 0.83   | 0.45   |
| GAIF01004828.1 | 0.19   | 0.07   | 0      | 1.56   | 7.39   | 0.14   |
| GAIF01004829.1 | 0      | 0      | 0.33   | 0      | 0.19   | 0      |
| GAIF01004831.1 | 0      | 0      | 0      | 0.38   | 0.04   | 0      |
| GAIF01004833.1 | 0      | 0.69   | 0      | 0.7    | 1.18   | 0      |
| GAIF01004838.1 | 12.38  | 18.94  | 0      | 38.22  | 61.7   | 39.32  |
| GAIF01004839.1 | 171.74 | 255.28 | 334.82 | 97.51  | 54.29  | 98.91  |
| GAIF01004840.1 | 51.78  | 29.63  | 50.43  | 36.54  | 53.91  | 134.38 |
| GAIF01004841.1 | 0.88   | 0.93   | 0      | 0.58   | 0.83   | 0.74   |
| GAIF01004842.1 | 0      | 0      | 0      | 0.34   | 1.41   | 0.16   |
| GAIF01004844.1 | 21.43  | 16.66  | 16.99  | 52.15  | 15.92  | 15.09  |
| GAIF01004845.1 | 1.66   | 6.11   | 6.52   | 2.2    | 4.4    | 0      |
| GAIF01004846.1 | 0.2    | 0      | 0      | 0.31   | 0.36   | 0      |
| GAIF01004847.1 | 14.63  | 23.13  | 14.39  | 44.13  | 34.63  | 3.46   |
| GAIF01004849.1 | 0.84   | 0.91   | 0.31   | 2.11   | 2.19   | 0      |
| GAIF01004851.1 | 0      | 0      | 0      | 0      | 0.02   | 0      |
| GAIF01004852.1 | 1.09   | 2.6    | 1.7    | 4.54   | 5.1    | 1.08   |
| GAIF01004853.1 | 15.13  | 0.95   | 0.96   | 21.63  | 47.47  | 2.89   |
| GAIF01004854.1 | 3.61   | 2.73   | 1.16   | 0.24   | 0      | 0.24   |
| GAIF01004855.1 | 0      | 1.5    | 0.97   | 0      | 0      | 0.65   |
| GAIF01004858.1 | 1.09   | 2.2    | 0      | 15.15  | 35.69  | 0      |
| GAIF01004860.1 | 0      | 0      | 0.32   | 0      | 0      | 0      |
| GAIF01004861.1 | 0      | 0.1    | 0      | 0.07   | 0.16   | 0      |
| GAIF01004863.1 | 2.24   | 2.89   | 3.91   | 1.45   | 2.29   | 2.1    |
| GAIF01004864.1 | 4.1    | 1.32   | 2.9    | 3.4    | 5.41   | 5.07   |
| GAIF01004865.1 | 38.16  | 44.32  | 29.32  | 54.55  | 60.45  | 4.91   |
| GAIF01004866.1 | 0.39   | 0.23   | 0.53   | 1.33   | 4.88   | 0.55   |
| GAIF01004867.1 | 4      | 4.85   | 6.78   | 11.28  | 11.64  | 9.16   |
| GAIF01004868.1 | 0.25   | 0.2    | 0.05   | 0.19   | 0.26   | 0.36   |
| GAIF01004869.1 | 0      | 0      | 0      | 0      | 0.14   | 0.26   |
| GAIF01004873.1 | 0.06   | 0.26   | 0.1    | 0.11   | 0      | 0      |
| GAIF01004874.1 | 0      | 0      | 0      | 0.35   | 3.04   | 0.16   |
| GAIF01004879.1 | 92.83  | 36.97  | 41.5   | 92.66  | 55.41  | 28.74  |
| GAIF01004880.1 | 1.42   | 0.26   | 0.65   | 10.82  | 48.67  | 2.21   |
| GAIF01004881.1 | 0      | 0.02   | 0      | 0      | 0.02   | 0      |
| GAIF01004882.1 | 488.83 | 149.82 | 60.47  | 525.34 | 627.31 | 82.11  |
| GAIF01004883.1 | 0.09   | 0.14   | 0.03   | 1.24   | 4.24   | 0      |
| GAIF01004885.1 | 0.36   | 0      | 0      | 0      | 0      | 0.2    |
| GAIF01004886.1 | 0.13   | 0      | 0.25   | 0.11   | 0      | 0.13   |
| GAIF01004887.1 | 10.86  | 10.6   | 6.69   | 2.83   | 3.86   | 0.24   |
| GAIF01004888.1 | 0      | 0      | 0      | 0      | 0.5    | 0      |
| GAIF01004889.1 | 0.58   | 4.39   | 2.21   | 0.68   | 1.27   | 1.78   |
| GAIF01004890.1 | 0      | 0.05   | 0      | 0      | 0.58   | 0.3    |
| GAIF01004891.1 | 0.31   | 0.2    | 0.2    | 0.28   | 0.07   | 0.07   |

|                |        |        |        |        |        |        |
|----------------|--------|--------|--------|--------|--------|--------|
| GAIF01004894.1 | 65.74  | 80.01  | 89.53  | 63.18  | 43.6   | 36.04  |
| GAIF01004897.1 | 2.8    | 3.22   | 0      | 7.04   | 20.41  | 3.37   |
| GAIF01004898.1 | 0.08   | 0      | 0      | 0      | 0      | 0      |
| GAIF01004903.1 | 10.46  | 16.58  | 10.59  | 31.39  | 23.77  | 6.02   |
| GAIF01004904.1 | 0.36   | 0      | 0.79   | 0.63   | 0.22   | 0.53   |
| GAIF01004905.1 | 0      | 0.96   | 0      | 2.24   | 0.37   | 0      |
| GAIF01004906.1 | 0.66   | 0.22   | 0      | 0.38   | 0.08   | 0.22   |
| GAIF01004907.1 | 1.24   | 1.68   | 0.81   | 2.36   | 4.16   | 0.53   |
| GAIF01004910.1 | 885.19 | 887.51 | 682.08 | 219.43 | 112.97 | 81.27  |
| GAIF01004911.1 | 0.37   | 0      | 0      | 0.68   | 1.48   | 0.1    |
| GAIF01004912.1 | 24.79  | 30.81  | 24.69  | 9.51   | 12.52  | 5.65   |
| GAIF01004913.1 | 0.59   | 0.07   | 0      | 1.23   | 0.51   | 0      |
| GAIF01004914.1 | 2.13   | 0      | 0      | 2.41   | 6.26   | 0      |
| GAIF01004915.1 | 8.85   | 1.19   | 2      | 31.87  | 61.89  | 8.6    |
| GAIF01004916.1 | 0      | 0      | 0.06   | 0      | 0.12   | 0.06   |
| GAIF01004917.1 | 1.62   | 3.32   | 3.7    | 0.26   | 0.22   | 0      |
| GAIF01004919.1 | 0      | 0      | 0      | 1.46   | 1.36   | 1.79   |
| GAIF01004920.1 | 4.6    | 4.41   | 0.24   | 2.04   | 2.11   | 0      |
| GAIF01004921.1 | 4.59   | 13.18  | 11.17  | 0      | 0      | 0      |
| GAIF01004922.1 | 0.07   | 0      | 0      | 0      | 0      | 0      |
| GAIF01004923.1 | 219.56 | 288.85 | 242.59 | 87.21  | 45.24  | 53.05  |
| GAIF01004924.1 | 10.28  | 9.67   | 14.06  | 23.21  | 20.63  | 13.62  |
| GAIF01004925.1 | 130.26 | 297.31 | 82.62  | 8.41   | 5.92   | 1.33   |
| GAIF01004926.1 | 6.21   | 5.39   | 1.7    | 1.06   | 2.23   | 2.38   |
| GAIF01004927.1 | 0.59   | 0      | 0      | 0      | 0      | 0      |
| GAIF01004928.1 | 0.85   | 0.14   | 0.11   | 1.17   | 0.77   | 0.76   |
| GAIF01004929.1 | 11.56  | 18.34  | 13.43  | 31.38  | 17.84  | 4.56   |
| GAIF01004930.1 | 7.35   | 0      | 0.23   | 12.03  | 2.42   | 1.68   |
| GAIF01004931.1 | 29.57  | 20.63  | 24.16  | 18.73  | 22.91  | 10.82  |
| GAIF01004932.1 | 0      | 0      | 0      | 0.13   | 1.62   | 0.25   |
| GAIF01004934.1 | 0      | 0      | 0      | 0      | 0      | 0.54   |
| GAIF01004937.1 | 5.48   | 5.05   | 4.85   | 14.16  | 10.31  | 2.56   |
| GAIF01004939.1 | 0      | 0      | 0      | 0      | 0.03   | 0      |
| GAIF01004940.1 | 0      | 0.03   | 0      | 0.06   | 0      | 0      |
| GAIF01004941.1 | 15.31  | 5.64   | 6.85   | 17.29  | 24.79  | 38.15  |
| GAIF01004942.1 | 0      | 0      | 0.05   | 0      | 0.17   | 0      |
| GAIF01004944.1 | 0      | 0.03   | 0.03   | 0.09   | 0      | 0      |
| GAIF01004945.1 | 0.19   | 0.06   | 0      | 0.73   | 3.01   | 0.21   |
| GAIF01004946.1 | 4.91   | 1.6    | 0.81   | 8.84   | 24.52  | 4.33   |
| GAIF01004947.1 | 15.34  | 7.54   | 5.58   | 3.75   | 2.56   | 1.02   |
| GAIF01004948.1 | 0      | 0      | 0      | 0.14   | 0.2    | 0      |
| GAIF01004949.1 | 0      | 0      | 0      | 0.23   | 0.84   | 0      |
| GAIF01004951.1 | 39.88  | 5.92   | 5.57   | 50.31  | 67.17  | 222.88 |
| GAIF01004952.1 | 1.11   | 1.84   | 0.45   | 20.62  | 53.04  | 0.14   |



|                |       |       |       |       |       |       |
|----------------|-------|-------|-------|-------|-------|-------|
| GAIF01004953.1 | 0.18  | 0.1   | 0     | 2.76  | 10.01 | 0.3   |
| GAIF01004955.1 | 0     | 0     | 0     | 0     | 0.25  | 0     |
| GAIF01004957.1 | 28.27 | 14.33 | 13.42 | 52.96 | 53.92 | 11.07 |
| GAIF01004958.1 | 3.51  | 3.92  | 3.31  | 0.68  | 0.59  | 0.21  |
| GAIF01004959.1 | 0     | 0     | 0     | 0     | 0.27  | 0     |
| GAIF01004960.1 | 0.02  | 0     | 0     | 0     | 0     | 0     |
| GAIF01004961.1 | 0     | 0.38  | 0     | 0     | 0     | 0     |
| GAIF01004962.1 | 0.18  | 0.07  | 0.07  | 0.77  | 4.98  | 0.07  |
| GAIF01004963.1 | 3.73  | 3.13  | 1.4   | 0.99  | 2.82  | 0     |
| GAIF01004964.1 | 2.24  | 3.95  | 3.26  | 7.85  | 14.95 | 0.8   |
| GAIF01004965.1 | 30.39 | 80.12 | 87.39 | 64.41 | 62.8  | 19.95 |
| GAIF01004966.1 | 0.21  | 0.45  | 0.08  | 3.33  | 8.63  | 0.15  |
| GAIF01004968.1 | 7.85  | 10.92 | 8.57  | 29.46 | 16.09 | 1.93  |
| GAIF01004969.1 | 20.36 | 23.85 | 22.4  | 32.77 | 18.64 | 15.96 |
| GAIF01004970.1 | 0     | 0.02  | 0     | 0.03  | 0.05  | 0     |
| GAIF01004971.1 | 3.95  | 2.52  | 1.22  | 2.43  | 2.53  | 2.21  |
| GAIF01004973.1 | 14.54 | 19.47 | 6.6   | 11.43 | 46.38 | 13.24 |
| GAIF01004975.1 | 4.15  | 7.14  | 4.55  | 2.72  | 2.54  | 0.52  |
| GAIF01004976.1 | 0     | 0     | 0     | 0     | 0.06  | 0     |
| GAIF01004979.1 | 1.19  | 1.28  | 0.42  | 0     | 0     | 0     |
| GAIF01004981.1 | 0     | 2.57  | 1.76  | 0     | 0     | 0.17  |
| GAIF01004982.1 | 0.02  | 0.04  | 0     | 0.35  | 0     | 0     |
| GAIF01004986.1 | 0.3   | 0.05  | 0     | 0.12  | 0.06  | 0.05  |
| GAIF01004987.1 | 21.64 | 34.07 | 24.83 | 59.67 | 44.73 | 7.48  |
| GAIF01004990.1 | 0     | 0     | 0     | 0     | 0     | 0.14  |
| GAIF01004992.1 | 0     | 0.17  | 0.19  | 0     | 0     | 0     |
| GAIF01004994.1 | 5.7   | 15.54 | 23.9  | 19.71 | 26.12 | 50.11 |
| GAIF01004996.1 | 3.09  | 2.36  | 5.62  | 2.94  | 2.61  | 0     |
| GAIF01004997.1 | 3.37  | 3.75  | 0.15  | 28.66 | 47.47 | 0.95  |
| GAIF01004999.1 | 0     | 0     | 0     | 0     | 0.1   | 0     |
| GAIF01005000.1 | 14.18 | 17.77 | 10.26 | 39.58 | 31.77 | 5.02  |
| GAIF01005001.1 | 0.56  | 0.2   | 0.21  | 1.86  | 1.81  | 0.93  |
| GAIF01005004.1 | 0.68  | 0.04  | 0.14  | 5.66  | 23.04 | 0.87  |
| GAIF01005006.1 | 0     | 0     | 0     | 0     | 0.18  | 0     |
| GAIF01005008.1 | 10.05 | 5.67  | 2.5   | 35.76 | 48.79 | 0.3   |
| GAIF01005009.1 | 0.16  | 0     | 0     | 0     | 0     | 0     |
| GAIF01005013.1 | 0     | 0     | 0.26  | 0     | 0     | 0     |
| GAIF01005014.1 | 0     | 0     | 0     | 0     | 0.76  | 0     |
| GAIF01005016.1 | 1.66  | 1.2   | 0     | 7.37  | 17.95 | 0.3   |
| GAIF01005017.1 | 2.03  | 2.32  | 1.12  | 5.08  | 7.46  | 0.34  |
| GAIF01005018.1 | 0.29  | 0.17  | 0.79  | 2.19  | 3.76  | 0.67  |
| GAIF01005019.1 | 0     | 0     | 0.89  | 0     | 0     | 0.43  |
| GAIF01005020.1 | 1.3   | 0     | 0     | 0.85  | 1.39  | 5.77  |
| GAIF01005021.1 | 20.93 | 11.69 | 5.55  | 51.32 | 53.76 | 8.16  |

|                |       |       |        |        |       |        |
|----------------|-------|-------|--------|--------|-------|--------|
| GAIF01005022.1 | 0     | 0     | 0      | 0      | 0.18  | 0      |
| GAIF01005023.1 | 56.72 | 34.51 | 56.39  | 108.43 | 46.29 | 27.53  |
| GAIF01005027.1 | 0.12  | 0.07  | 0      | 0.06   | 0     | 0      |
| GAIF01005028.1 | 1.61  | 0.25  | 0.17   | 5.86   | 39.47 | 9.44   |
| GAIF01005031.1 | 0.11  | 0.12  | 0      | 0.21   | 2.27  | 0      |
| GAIF01005032.1 | 0.7   | 0.11  | 0.11   | 2.54   | 13.62 | 0.11   |
| GAIF01005034.1 | 0.67  | 0.18  | 0      | 4.48   | 19.16 | 0.09   |
| GAIF01005035.1 | 0.15  | 0     | 0      | 0.72   | 1.99  | 0      |
| GAIF01005036.1 | 0     | 0.14  | 0      | 0      | 0     | 0      |
| GAIF01005037.1 | 0.02  | 0.13  | 0.58   | 0.48   | 0.52  | 0.29   |
| GAIF01005038.1 | 0.37  | 0.1   | 0      | 0      | 0     | 0.33   |
| GAIF01005039.1 | 0.27  | 0.13  | 0      | 0.79   | 3.54  | 0.08   |
| GAIF01005040.1 | 65.1  | 67.51 | 133.41 | 185.2  | 144.4 | 112.28 |
| GAIF01005043.1 | 0.41  | 0.15  | 0      | 1.18   | 13.36 | 0      |
| GAIF01005046.1 | 0.35  | 0.33  | 0.17   | 1.95   | 4.33  | 0      |
| GAIF01005049.1 | 2.68  | 3.34  | 0      | 27.68  | 78    | 0.34   |
| GAIF01005051.1 | 0     | 0.12  | 0.13   | 0.13   | 0.05  | 0.21   |
| GAIF01005053.1 | 1.83  | 2.43  | 0.82   | 4.16   | 3.17  | 0.37   |
| GAIF01005054.1 | 3.49  | 1.02  | 0.74   | 8.11   | 27.94 | 2.96   |
| GAIF01005055.1 | 0     | 0     | 0.49   | 0.28   | 0     | 0.16   |
| GAIF01005056.1 | 5     | 1.41  | 4.94   | 1.97   | 1.08  | 2.53   |
| GAIF01005058.1 | 3.44  | 0     | 0      | 4.29   | 10.82 | 2.14   |
| GAIF01005059.1 | 0.03  | 0     | 0      | 0.2    | 0.34  | 0.06   |
| GAIF01005060.1 | 0.03  | 0     | 0.03   | 0.09   | 0.89  | 0      |
| GAIF01005062.1 | 0     | 0     | 0      | 0      | 0.88  | 0      |
| GAIF01005063.1 | 0     | 0.04  | 0      | 0.65   | 3.79  | 0.13   |
| GAIF01005064.1 | 41.29 | 48.7  | 37.48  | 46.55  | 37.21 | 27.86  |
| GAIF01005065.1 | 0     | 0     | 0      | 0      | 0.71  | 1.04   |
| GAIF01005066.1 | 2.67  | 7.74  | 6.7    | 8.26   | 7.03  | 1.26   |
| GAIF01005067.1 | 0     | 0.05  | 0      | 0      | 0     | 0      |
| GAIF01005069.1 | 13.61 | 3.65  | 5.61   | 20.46  | 5.55  | 7.13   |
| GAIF01005070.1 | 12.12 | 8.63  | 15.14  | 31.43  | 16.18 | 34.63  |
| GAIF01005071.1 | 0     | 0.08  | 0.65   | 0      | 0     | 0      |
| GAIF01005072.1 | 0.12  | 0.13  | 0.13   | 0.27   | 0.42  | 0.13   |
| GAIF01005073.1 | 0     | 0     | 0.34   | 0      | 0     | 0      |
| GAIF01005074.1 | 5.11  | 0     | 4.01   | 2.35   | 1.59  | 10.49  |
| GAIF01005076.1 | 0     | 0     | 0      | 0      | 0.09  | 0      |
| GAIF01005078.1 | 0.19  | 0     | 0      | 0      | 0     | 0      |
| GAIF01005079.1 | 0     | 2.21  | 5.95   | 0      | 0     | 1.77   |
| GAIF01005080.1 | 10.34 | 12.09 | 5.17   | 32.92  | 34.88 | 0.91   |
| GAIF01005081.1 | 7.88  | 8.39  | 0      | 9.04   | 11.93 | 0.32   |
| GAIF01005082.1 | 1.1   | 1.52  | 1.44   | 3.76   | 2.97  | 0.22   |
| GAIF01005083.1 | 1.69  | 0.62  | 0.45   | 7.14   | 6.29  | 0.46   |
| GAIF01005084.1 | 0.28  | 0     | 0.08   | 0      | 0     | 0.04   |

|                |        |         |         |        |        |        |
|----------------|--------|---------|---------|--------|--------|--------|
| GAIF01005085.1 | 0.11   | 0       | 0       | 0.04   | 0      | 0      |
| GAIF01005086.1 | 27.44  | 38.13   | 62.36   | 26.39  | 17.49  | 10.26  |
| GAIF01005089.1 | 33.99  | 13.93   | 1.59    | 292.01 | 767.61 | 77.34  |
| GAIF01005093.1 | 21.37  | 15.43   | 9.76    | 39.96  | 17.38  | 6.28   |
| GAIF01005094.1 | 48.73  | 9.07    | 9.65    | 35.33  | 28.83  | 29.75  |
| GAIF01005095.1 | 15.07  | 7.17    | 7.47    | 25.55  | 20.65  | 12.92  |
| GAIF01005096.1 | 3.43   | 0.09    | 0.4     | 7.68   | 23.58  | 0      |
| GAIF01005097.1 | 0.31   | 1.27    | 0.67    | 0.48   | 5.11   | 0.06   |
| GAIF01005098.1 | 21.74  | 22.39   | 17.89   | 7.95   | 3.04   | 8.21   |
| GAIF01005099.1 | 3.82   | 5.48    | 3.81    | 4.01   | 5.12   | 0.87   |
| GAIF01005101.1 | 29.25  | 37.05   | 25.63   | 73.84  | 61.36  | 15.09  |
| GAIF01005103.1 | 0      | 0.06    | 0.02    | 0      | 0.31   | 0      |
| GAIF01005104.1 | 4.49   | 4.54    | 1.7     | 13.37  | 40.06  | 1.61   |
| GAIF01005105.1 | 0      | 0       | 0.39    | 0      | 0.21   | 0.19   |
| GAIF01005106.1 | 13.68  | 13.33   | 28.75   | 46.57  | 36.15  | 16.92  |
| GAIF01005107.1 | 0      | 0       | 0       | 0      | 0.19   | 0      |
| GAIF01005108.1 | 725.41 | 3598.08 | 1227.23 | 52.72  | 181.1  | 28.71  |
| GAIF01005109.1 | 3.51   | 4.87    | 3.05    | 2.73   | 3.53   | 0.04   |
| GAIF01005110.1 | 0      | 0       | 0       | 0.13   | 0      | 0      |
| GAIF01005111.1 | 0.11   | 0       | 0       | 0.5    | 0.73   | 0      |
| GAIF01005112.1 | 6.26   | 4.17    | 1.96    | 0.43   | 0.13   | 0.12   |
| GAIF01005116.1 | 0      | 0       | 0       | 0.08   | 0      | 40.05  |
| GAIF01005117.1 | 0.06   | 0.17    | 0.04    | 0.59   | 2.69   | 0      |
| GAIF01005118.1 | 28.36  | 21.54   | 20.1    | 18.68  | 9.8    | 8.09   |
| GAIF01005119.1 | 0      | 0       | 0       | 1.39   | 1.7    | 1.64   |
| GAIF01005121.1 | 0      | 0       | 0       | 0.07   | 0.22   | 0      |
| GAIF01005122.1 | 10.48  | 5.51    | 1.77    | 20.18  | 41.96  | 114.84 |
| GAIF01005123.1 | 13.67  | 5.95    | 10.08   | 6.12   | 1.88   | 6.03   |
| GAIF01005125.1 | 16.69  | 26      | 20.8    | 21.99  | 9.77   | 5.22   |
| GAIF01005126.1 | 0      | 0.31    | 0.32    | 0      | 0      | 0      |
| GAIF01005128.1 | 32.92  | 45.32   | 43.99   | 10.33  | 5.82   | 3.61   |
| GAIF01005129.1 | 38.32  | 24.89   | 14.72   | 58.48  | 44.12  | 19.74  |
| GAIF01005130.1 | 0.07   | 0       | 0       | 0      | 0      | 0      |
| GAIF01005131.1 | 8.83   | 0       | 1.52    | 11.22  | 7.44   | 24.24  |
| GAIF01005132.1 | 34.84  | 11.91   | 13.04   | 20.84  | 17.92  | 19.8   |
| GAIF01005133.1 | 0.18   | 0.39    | 0.99    | 0      | 0.22   | 0.19   |
| GAIF01005134.1 | 0.15   | 0       | 0       | 0.52   | 1.79   | 0      |
| GAIF01005135.1 | 2.09   | 0.7     | 0.7     | 1.28   | 0.63   | 0.51   |
| GAIF01005136.1 | 13.42  | 9.69    | 13.3    | 22.61  | 26.24  | 11.6   |
| GAIF01005138.1 | 18.08  | 16.51   | 5.83    | 17.94  | 32.49  | 10.96  |
| GAIF01005139.1 | 371.33 | 1175    | 1137.44 | 280.35 | 214.85 | 317.39 |
| GAIF01005140.1 | 0.39   | 2.13    | 0       | 4.4    | 3.93   | 0.14   |
| GAIF01005141.1 | 0.44   | 0       | 0.16    | 0      | 0.28   | 0      |
| GAIF01005142.1 | 1.37   | 0.16    | 0       | 1.63   | 2.93   | 0.68   |

|                |        |        |        |        |        |        |
|----------------|--------|--------|--------|--------|--------|--------|
| GAIF01005143.1 | 43.63  | 29.79  | 18.65  | 35.74  | 71.92  | 14.15  |
| GAIF01005144.1 | 30.47  | 23.83  | 7.28   | 38.22  | 31.72  | 2.46   |
| GAIF01005145.1 | 8.99   | 0      | 14.58  | 22.13  | 0      | 0      |
| GAIF01005146.1 | 0      | 0      | 0      | 0.13   | 0      | 0.11   |
| GAIF01005147.1 | 111.13 | 90.83  | 80.19  | 50.46  | 30.29  | 15.75  |
| GAIF01005149.1 | 0      | 0      | 0      | 0.04   | 0.08   | 0.08   |
| GAIF01005150.1 | 57.23  | 63.99  | 43.48  | 56.13  | 49.57  | 9.88   |
| GAIF01005155.1 | 0      | 0.7    | 1.03   | 0      | 0      | 0.24   |
| GAIF01005156.1 | 0.16   | 0      | 0      | 0      | 0.56   | 0      |
| GAIF01005157.1 | 15.86  | 18.87  | 18.11  | 8.34   | 7.67   | 11.34  |
| GAIF01005158.1 | 0.17   | 0      | 0.05   | 0      | 0.45   | 0.08   |
| GAIF01005159.1 | 22.12  | 29.06  | 48.56  | 47.41  | 27.89  | 40.28  |
| GAIF01005160.1 | 251.92 | 248.46 | 412.95 | 314.45 | 198.11 | 372.16 |
| GAIF01005162.1 | 6.9    | 4.22   | 3.57   | 11.69  | 6.01   | 5.07   |
| GAIF01005163.1 | 0.47   | 0.17   | 0.12   | 0.06   | 0.06   | 0      |
| GAIF01005167.1 | 3.01   | 3.51   | 3.01   | 6.39   | 5.3    | 2.41   |
| GAIF01005168.1 | 4.46   | 4.13   | 3.38   | 1.63   | 2.56   | 0.83   |
| GAIF01005170.1 | 0.9    | 0.51   | 0      | 0.19   | 1.77   | 0.74   |
| GAIF01005172.1 | 2.19   | 0      | 0.06   | 6.72   | 20.1   | 0.52   |
| GAIF01005173.1 | 10.25  | 9.23   | 2.52   | 55.34  | 40.47  | 2.37   |
| GAIF01005174.1 | 22.87  | 0.24   | 5.79   | 46.2   | 16.4   | 29.32  |
| GAIF01005176.1 | 0.49   | 0.21   | 0.21   | 0      | 0.12   | 0      |
| GAIF01005177.1 | 100.33 | 109.95 | 145.26 | 19.28  | 101.63 | 17.75  |
| GAIF01005179.1 | 0      | 0      | 0      | 0.07   | 0      | 0      |
| GAIF01005180.1 | 0.05   | 0.08   | 0      | 0.54   | 1.21   | 0.24   |
| GAIF01005184.1 | 0.13   | 0.14   | 0      | 0.67   | 4.96   | 0.5    |
| GAIF01005187.1 | 13.4   | 4.26   | 7.5    | 34.06  | 12.27  | 52.73  |
| GAIF01005188.1 | 0      | 0      | 0      | 0.44   | 0      | 0      |
| GAIF01005189.1 | 0.78   | 0      | 0.49   | 0.36   | 3.61   | 1.17   |
| GAIF01005192.1 | 0      | 0      | 0      | 0      | 0      | 0.23   |
| GAIF01005193.1 | 7.65   | 9.77   | 8.12   | 0.68   | 0.69   | 1.79   |
| GAIF01005194.1 | 0      | 0      | 0      | 0.02   | 0.38   | 0      |
| GAIF01005196.1 | 6.56   | 0.03   | 0.42   | 26.87  | 53.27  | 0.73   |
| GAIF01005197.1 | 0      | 0      | 0      | 0      | 0.09   | 0      |
| GAIF01005198.1 | 0.7    | 0.38   | 0      | 4.47   | 14.66  | 0.11   |
| GAIF01005200.1 | 2.16   | 0      | 0      | 2.23   | 4.04   | 1.85   |
| GAIF01005201.1 | 0.33   | 1.6    | 0.37   | 0.93   | 1.56   | 0.36   |
| GAIF01005202.1 | 0      | 0      | 0.08   | 0      | 0.09   | 0      |
| GAIF01005203.1 | 0      | 0      | 0      | 0.08   | 0.26   | 0      |
| GAIF01005205.1 | 0      | 0      | 0      | 0      | 0.46   | 0      |
| GAIF01005207.1 | 3.63   | 1.37   | 1.34   | 3.14   | 2.4    | 1.35   |
| GAIF01005208.1 | 61.44  | 70.77  | 38.15  | 86.61  | 104.32 | 10.55  |
| GAIF01005214.1 | 0.25   | 0.13   | 0      | 0.43   | 2.38   | 0.14   |
| GAIF01005215.1 | 2.26   | 2.6    | 0.51   | 6.48   | 0      | 0.17   |

|                |        |        |        |        |        |        |
|----------------|--------|--------|--------|--------|--------|--------|
| GAIF01005216.1 | 8.88   | 7.32   | 7.64   | 27.14  | 52.96  | 5.48   |
| GAIF01005218.1 | 72.9   | 85.87  | 31.09  | 152.62 | 120.76 | 12.81  |
| GAIF01005219.1 | 38.68  | 47.2   | 33.7   | 19.44  | 22.93  | 57.67  |
| GAIF01005221.1 | 7.36   | 6.1    | 3.74   | 28.73  | 33.02  | 3.9    |
| GAIF01005223.1 | 45.42  | 17.63  | 20.59  | 8.6    | 7.14   | 40.55  |
| GAIF01005224.1 | 12.41  | 9.1    | 6.53   | 31.02  | 34.85  | 7.57   |
| GAIF01005225.1 | 0      | 0      | 0      | 0.28   | 1.56   | 0      |
| GAIF01005227.1 | 0.09   | 0.31   | 0.28   | 0      | 0      | 0      |
| GAIF01005228.1 | 0      | 0      | 0      | 0      | 1.44   | 0      |
| GAIF01005229.1 | 0      | 0      | 0      | 0.01   | 0.4    | 0      |
| GAIF01005230.1 | 1.55   | 0.5    | 0.1    | 3.76   | 13.06  | 0      |
| GAIF01005231.1 | 1.03   | 0.27   | 0.19   | 1.47   | 0.63   | 0.46   |
| GAIF01005233.1 | 418.94 | 313.92 | 176.14 | 498.19 | 343.71 | 309.48 |
| GAIF01005234.1 | 0.05   | 0.05   | 0.09   | 0      | 0      | 0      |
| GAIF01005235.1 | 2.54   | 4.81   | 0.72   | 18.09  | 98.32  | 0      |
| GAIF01005240.1 | 3.74   | 2.74   | 1.88   | 3.75   | 2.06   | 0.89   |
| GAIF01005241.1 | 6.03   | 12.64  | 4.58   | 13.26  | 12.44  | 2.19   |
| GAIF01005242.1 | 0      | 4.25   | 9.2    | 0.1    | 0      | 61.65  |
| GAIF01005243.1 | 0.17   | 0.05   | 0      | 0.2    | 0      | 0      |
| GAIF01005244.1 | 0.56   | 1.05   | 1.5    | 2.91   | 5.23   | 2.33   |
| GAIF01005245.1 | 93.78  | 94.71  | 176.93 | 300.91 | 191.57 | 229.67 |
| GAIF01005246.1 | 1.01   | 0.12   | 0      | 2.47   | 8.21   | 0.12   |
| GAIF01005249.1 | 4.97   | 2.44   | 0      | 9.22   | 15.25  | 7.38   |
| GAIF01005252.1 | 0      | 0      | 0      | 0      | 0.13   | 0      |
| GAIF01005253.1 | 0      | 0      | 0.41   | 0      | 0      | 0      |
| GAIF01005254.1 | 0      | 0.41   | 0.21   | 0      | 0.07   | 0      |
| GAIF01005255.1 | 3      | 4.03   | 7.21   | 1      | 0.56   | 3.5    |
| GAIF01005257.1 | 0      | 0      | 0      | 1.25   | 7.04   | 0      |
| GAIF01005258.1 | 0.16   | 0      | 0      | 0      | 0.19   | 0.57   |
| GAIF01005259.1 | 9.26   | 14.88  | 14.72  | 13.63  | 7.31   | 2.44   |
| GAIF01005260.1 | 2.16   | 0.39   | 0.1    | 4.69   | 31.24  | 2.77   |
| GAIF01005261.1 | 1.78   | 0.14   | 0.14   | 7.38   | 28.44  | 4.2    |
| GAIF01005262.1 | 22.34  | 9.23   | 4.66   | 12.06  | 39.09  | 9.48   |
| GAIF01005263.1 | 2.51   | 1.6    | 0.37   | 8.65   | 23.07  | 0.15   |
| GAIF01005264.1 | 0      | 0      | 0.13   | 0.16   | 0.22   | 0      |
| GAIF01005266.1 | 13.59  | 11.85  | 16.29  | 7.22   | 4.12   | 7.66   |
| GAIF01005267.1 | 207.24 | 201.08 | 84.17  | 639.45 | 651.54 | 58     |
| GAIF01005268.1 | 0      | 0      | 0      | 0      | 0.09   | 0      |
| GAIF01005269.1 | 45.5   | 40.38  | 25.55  | 70.89  | 94.4   | 29.06  |
| GAIF01005270.1 | 1.66   | 2.04   | 0.37   | 10.03  | 15.25  | 0.28   |
| GAIF01005271.1 | 4.79   | 1.56   | 3.07   | 1.53   | 1.8    | 0      |
| GAIF01005272.1 | 0      | 0      | 7.17   | 0      | 0      | 0      |
| GAIF01005273.1 | 0      | 0      | 0      | 0      | 0.07   | 0      |
| GAIF01005274.1 | 22.83  | 12.56  | 25.07  | 41.62  | 21.16  | 46.18  |

|                |        |        |        |        |        |       |
|----------------|--------|--------|--------|--------|--------|-------|
| GAIF01005276.1 | 0      | 0      | 0      | 0.28   | 0      | 0     |
| GAIF01005277.1 | 0.09   | 0.47   | 0      | 4.38   | 12.79  | 0     |
| GAIF01005279.1 | 0      | 0      | 0      | 0.34   | 0.17   | 0     |
| GAIF01005281.1 | 44.63  | 43.26  | 32.84  | 56.65  | 75.94  | 0     |
| GAIF01005282.1 | 0.37   | 0      | 0      | 0.14   | 0.08   | 0.14  |
| GAIF01005283.1 | 1.72   | 0      | 0.26   | 0.2    | 0      | 0     |
| GAIF01005284.1 | 0.08   | 0      | 0      | 0.07   | 0.38   | 0     |
| GAIF01005285.1 | 4.19   | 5.23   | 5.71   | 3.88   | 2.99   | 1.53  |
| GAIF01005287.1 | 7.56   | 10.05  | 5.73   | 27.88  | 45.76  | 4.7   |
| GAIF01005288.1 | 0      | 0.16   | 0      | 0.98   | 1.47   | 0     |
| GAIF01005289.1 | 1.44   | 2.64   | 0.92   | 0.88   | 1.19   | 0     |
| GAIF01005291.1 | 44.29  | 24.69  | 28.84  | 92.78  | 43.55  | 28.54 |
| GAIF01005292.1 | 0.03   | 0.03   | 0.09   | 0.2    | 0.69   | 0.06  |
| GAIF01005293.1 | 0      | 0.11   | 0      | 0      | 0.13   | 0     |
| GAIF01005297.1 | 4.4    | 4.75   | 5.89   | 3.79   | 4.47   | 4.25  |
| GAIF01005298.1 | 0      | 0      | 0.05   | 0      | 0      | 0     |
| GAIF01005300.1 | 6.05   | 7.24   | 4.77   | 27.2   | 25.52  | 1.52  |
| GAIF01005301.1 | 1.6    | 2.04   | 1.09   | 5.14   | 8.14   | 1.66  |
| GAIF01005302.1 | 0.29   | 0.06   | 0      | 0.84   | 5.64   | 1.45  |
| GAIF01005303.1 | 0.09   | 0      | 0      | 0.74   | 3.15   | 0.25  |
| GAIF01005305.1 | 2.23   | 0.69   | 0.87   | 0.95   | 1.11   | 0.35  |
| GAIF01005308.1 | 0.22   | 0.24   | 0      | 0.13   | 0      | 0     |
| GAIF01005310.1 | 0.28   | 0      | 0.08   | 2.24   | 8.7    | 0.23  |
| GAIF01005313.1 | 35.54  | 52.28  | 39.69  | 75.36  | 39.63  | 7.59  |
| GAIF01005314.1 | 0      | 0      | 0      | 0.1    | 0.4    | 0     |
| GAIF01005315.1 | 40.63  | 8.08   | 6.19   | 18.34  | 34.47  | 12.85 |
| GAIF01005317.1 | 0      | 0      | 0      | 0      | 0.27   | 0     |
| GAIF01005318.1 | 0      | 0      | 0      | 0.13   | 0      | 0     |
| GAIF01005319.1 | 1.97   | 0.75   | 0.75   | 9.57   | 32.53  | 2.84  |
| GAIF01005320.1 | 35.54  | 27.62  | 17.01  | 17.84  | 18.49  | 9.16  |
| GAIF01005321.1 | 25.1   | 34.26  | 20.65  | 29.42  | 15.05  | 4.96  |
| GAIF01005322.1 | 9.13   | 3.98   | 7.34   | 17.64  | 20.15  | 60.24 |
| GAIF01005323.1 | 6.65   | 6.98   | 12.37  | 17.2   | 9.24   | 7.29  |
| GAIF01005324.1 | 1.2    | 0      | 0      | 0.29   | 0      | 0     |
| GAIF01005325.1 | 7.23   | 4.64   | 6.07   | 17.14  | 28.55  | 9.66  |
| GAIF01005326.1 | 69.17  | 45.73  | 41.94  | 12.63  | 9.76   | 3.87  |
| GAIF01005327.1 | 6.98   | 14.94  | 5.78   | 25.76  | 26.22  | 3.98  |
| GAIF01005328.1 | 9.24   | 6.96   | 10.03  | 34.61  | 21.47  | 4.86  |
| GAIF01005330.1 | 0      | 0      | 0      | 0      | 0.06   | 0     |
| GAIF01005331.1 | 0      | 0      | 0      | 0      | 0.23   | 0     |
| GAIF01005333.1 | 1.05   | 2.72   | 1.77   | 4.59   | 2.42   | 0.53  |
| GAIF01005334.1 | 0.27   | 0.13   | 0.04   | 0.04   | 0.14   | 0.08  |
| GAIF01005335.1 | 0      | 0      | 0      | 0      | 1.2    | 0     |
| GAIF01005337.1 | 210.72 | 221.87 | 106.08 | 433.88 | 322.22 | 39.62 |

|                |        |        |        |        |        |        |
|----------------|--------|--------|--------|--------|--------|--------|
| GAIF01005338.1 | 0      | 0      | 0      | 0      | 0.03   | 0      |
| GAIF01005340.1 | 58.15  | 61.61  | 65.44  | 96.31  | 85.45  | 81.58  |
| GAIF01005341.1 | 177.61 | 317.44 | 326.94 | 117.41 | 97.91  | 76.9   |
| GAIF01005342.1 | 0      | 0.71   | 0      | 0      | 0      | 0.15   |
| GAIF01005343.1 | 3.23   | 4.13   | 0.9    | 1.81   | 3.57   | 8.39   |
| GAIF01005344.1 | 0.62   | 0.36   | 0.01   | 2.03   | 3.83   | 0.04   |
| GAIF01005345.1 | 0.29   | 0.3    | 0      | 0      | 0.86   | 0      |
| GAIF01005346.1 | 6.64   | 10.93  | 9.57   | 17.27  | 12.9   | 0.96   |
| GAIF01005347.1 | 1.27   | 0.08   | 0      | 2.69   | 6.58   | 0.16   |
| GAIF01005348.1 | 4.03   | 1.03   | 0.35   | 0.78   | 2.27   | 0      |
| GAIF01005349.1 | 0      | 0      | 0      | 0.44   | 1.61   | 0      |
| GAIF01005353.1 | 475.33 | 282.88 | 131.93 | 124.14 | 240.8  | 13.47  |
| GAIF01005354.1 | 0      | 0      | 0.08   | 0      | 0      | 0      |
| GAIF01005355.1 | 1.02   | 0.1    | 0.3    | 2.36   | 11.8   | 0.92   |
| GAIF01005356.1 | 0      | 0.09   | 0      | 0      | 0      | 0      |
| GAIF01005357.1 | 10.06  | 6.21   | 3.16   | 23.52  | 27.65  | 22.85  |
| GAIF01005358.1 | 0      | 0      | 0      | 0      | 0.58   | 0      |
| GAIF01005359.1 | 5.25   | 7.86   | 5.09   | 6.31   | 2.5    | 1.04   |
| GAIF01005360.1 | 0.06   | 0.54   | 0.07   | 0.1    | 0.9    | 0.05   |
| GAIF01005361.1 | 0      | 0      | 0      | 0.1    | 0.52   | 0      |
| GAIF01005362.1 | 0      | 0      | 0      | 0      | 0      | 0.07   |
| GAIF01005363.1 | 0.92   | 0      | 0      | 4.56   | 21.58  | 0.29   |
| GAIF01005365.1 | 637.21 | 578.67 | 466.76 | 519.1  | 305.31 | 212.57 |
| GAIF01005366.1 | 13.11  | 19.54  | 8.16   | 9.29   | 9.02   | 2.45   |
| GAIF01005367.1 | 36.57  | 44.66  | 25.23  | 49.22  | 74.88  | 5.76   |
| GAIF01005368.1 | 18.14  | 7.16   | 4.5    | 20.37  | 14.43  | 14.19  |
| GAIF01005370.1 | 0.34   | 0.29   | 0.17   | 0.79   | 0      | 0      |
| GAIF01005373.1 | 61.99  | 70.63  | 67.84  | 59.09  | 31.03  | 24.67  |
| GAIF01005375.1 | 2.31   | 3.78   | 5.89   | 13.68  | 26.19  | 5.1    |
| GAIF01005376.1 | 0      | 0.49   | 0.5    | 0      | 0      | 0      |
| GAIF01005378.1 | 0      | 0      | 0      | 0      | 0.09   | 0      |
| GAIF01005381.1 | 0      | 0.15   | 0      | 0.03   | 0      | 0      |
| GAIF01005382.1 | 0      | 0      | 0      | 0      | 0      | 0.14   |
| GAIF01005383.1 | 19.96  | 16.87  | 29.12  | 43.15  | 18.07  | 26.74  |
| GAIF01005384.1 | 6.97   | 1.3    | 2.04   | 19.03  | 10.68  | 21.44  |
| GAIF01005385.1 | 0.26   | 0.14   | 0.33   | 0.15   | 0.33   | 0.04   |
| GAIF01005387.1 | 0      | 1.68   | 0.8    | 0      | 0      | 0      |
| GAIF01005388.1 | 0.71   | 0      | 0      | 1.02   | 1.08   | 0.2    |
| GAIF01005389.1 | 0.14   | 0      | 0      | 0.42   | 2      | 0      |
| GAIF01005390.1 | 2.97   | 6.73   | 7.23   | 4.73   | 3.03   | 1.76   |
| GAIF01005391.1 | 0.14   | 0      | 0      | 0.16   | 0.32   | 0      |
| GAIF01005393.1 | 0      | 0.15   | 0      | 0.24   | 0.85   | 0.31   |
| GAIF01005395.1 | 0      | 0      | 0      | 0      | 0      | 0.15   |
| GAIF01005396.1 | 0.12   | 0.13   | 0      | 0      | 0.15   | 0      |

|                |        |        |        |        |        |        |
|----------------|--------|--------|--------|--------|--------|--------|
| GAIF01005398.1 | 4.39   | 0.95   | 0.78   | 5.13   | 11.12  | 1.08   |
| GAIF01005399.1 | 0.97   | 0.13   | 0.53   | 0.42   | 1.31   | 0.4    |
| GAIF01005400.1 | 26.77  | 17.11  | 23.14  | 48.19  | 22.98  | 59.47  |
| GAIF01005401.1 | 6.08   | 0.52   | 0.5    | 7.66   | 6.93   | 0.96   |
| GAIF01005402.1 | 1.61   | 0      | 0      | 0      | 1.94   | 2.67   |
| GAIF01005403.1 | 7.23   | 0.75   | 0.27   | 10.56  | 19.63  | 0.7    |
| GAIF01005404.1 | 124.85 | 113.83 | 151.39 | 566.94 | 304.19 | 153.31 |
| GAIF01005406.1 | 0.84   | 0      | 0      | 0.73   | 1.01   | 0      |
| GAIF01005407.1 | 99.2   | 102.07 | 220.64 | 291.67 | 123.5  | 151.03 |
| GAIF01005411.1 | 17.2   | 24.54  | 25.48  | 21.91  | 16.25  | 7.83   |
| GAIF01005412.1 | 33.24  | 75.26  | 26.56  | 15.25  | 25.22  | 3.04   |
| GAIF01005413.1 | 0      | 0      | 0      | 0      | 0.16   | 0      |
| GAIF01005414.1 | 0      | 0.12   | 0      | 0      | 0      | 0      |
| GAIF01005415.1 | 1.43   | 0.21   | 0.49   | 1.78   | 0.18   | 0.22   |
| GAIF01005416.1 | 0      | 0.04   | 0.04   | 0.04   | 0.08   | 0      |
| GAIF01005417.1 | 424.27 | 371.11 | 493.72 | 624.24 | 311.54 | 607.01 |
| GAIF01005418.1 | 7.02   | 3.02   | 0.92   | 12.04  | 13.73  | 11.88  |
| GAIF01005419.1 | 0.21   | 0.11   | 0      | 0.18   | 0.06   | 0.06   |
| GAIF01005420.1 | 11.95  | 23.39  | 11.07  | 12.25  | 10.73  | 1.09   |
| GAIF01005421.1 | 10.87  | 10.51  | 11.11  | 11.97  | 17.72  | 2.54   |
| GAIF01005422.1 | 0.9    | 2.75   | 4.66   | 0.98   | 2.24   | 4.8    |
| GAIF01005424.1 | 0      | 0      | 0      | 0.29   | 0.15   | 0.14   |
| GAIF01005426.1 | 1.03   | 0.26   | 0      | 0.37   | 1.21   | 0      |
| GAIF01005428.1 | 0      | 0.05   | 0      | 0      | 0.2    | 0      |
| GAIF01005430.1 | 0.21   | 0      | 0      | 0      | 0      | 0      |
| GAIF01005432.1 | 0      | 0      | 0      | 0      | 0.29   | 0      |
| GAIF01005433.1 | 17.92  | 15.07  | 9.59   | 46.07  | 67.05  | 10.28  |
| GAIF01005434.1 | 0      | 0      | 0.03   | 0      | 0      | 0      |
| GAIF01005436.1 | 0.23   | 0.25   | 0.26   | 3.52   | 8.79   | 0      |
| GAIF01005437.1 | 0      | 0      | 0      | 0      | 0.15   | 0      |
| GAIF01005438.1 | 65.6   | 52.15  | 40.29  | 133.16 | 86.29  | 27.98  |
| GAIF01005440.1 | 0.14   | 0      | 0      | 0.16   | 0      | 0      |
| GAIF01005441.1 | 75.35  | 98.23  | 297.22 | 55.5   | 43.19  | 196.64 |
| GAIF01005442.1 | 0      | 0      | 0      | 0      | 2.05   | 0      |
| GAIF01005443.1 | 11.82  | 1.39   | 1.09   | 47.05  | 117.67 | 177.03 |
| GAIF01005444.1 | 0      | 0      | 0      | 0      | 0.11   | 0.11   |
| GAIF01005445.1 | 32.79  | 23.04  | 8.29   | 9.01   | 12.35  | 1.19   |
| GAIF01005446.1 | 0      | 0      | 0      | 0.06   | 0      | 0      |
| GAIF01005448.1 | 1.46   | 0.65   | 0.19   | 10.34  | 11.02  | 0.28   |
| GAIF01005449.1 | 16.58  | 7.95   | 9.48   | 31.64  | 17.98  | 146.34 |
| GAIF01005450.1 | 0      | 0      | 0      | 0      | 0.13   | 0      |
| GAIF01005453.1 | 0      | 0.09   | 0.25   | 0      | 0.02   | 0.02   |
| GAIF01005454.1 | 2.54   | 0.29   | 0.12   | 6.65   | 23.14  | 0.29   |
| GAIF01005455.1 | 5.48   | 4.76   | 3.95   | 4.69   | 5.02   | 3.15   |



|                |        |        |        |        |       |        |
|----------------|--------|--------|--------|--------|-------|--------|
| GAIF01005456.1 | 0.12   | 0.91   | 0.66   | 0.83   | 1     | 0.13   |
| GAIF01005457.1 | 2.17   | 1.18   | 0      | 11.33  | 26.27 | 2.22   |
| GAIF01005458.1 | 12.86  | 6.31   | 1.96   | 37.71  | 40.04 | 2.66   |
| GAIF01005460.1 | 2.35   | 2.66   | 0      | 16.58  | 29.96 | 0.38   |
| GAIF01005462.1 | 0.25   | 0.37   | 0.37   | 2.65   | 4.57  | 0.42   |
| GAIF01005463.1 | 3.94   | 4.68   | 4      | 6.41   | 4.74  | 0.67   |
| GAIF01005464.1 | 1.88   | 0.86   | 0.34   | 12.59  | 30.76 | 0.34   |
| GAIF01005465.1 | 0      | 0      | 0      | 0      | 0.66  | 0      |
| GAIF01005466.1 | 0      | 0      | 0      | 0      | 0.04  | 0      |
| GAIF01005470.1 | 0.21   | 0.57   | 0.23   | 0.24   | 0     | 0.11   |
| GAIF01005471.1 | 0      | 0.23   | 0      | 0      | 0     | 0      |
| GAIF01005473.1 | 5.01   | 6.31   | 4.42   | 2.6    | 2.85  | 0.44   |
| GAIF01005474.1 | 0      | 0      | 0      | 0.86   | 6.49  | 0      |
| GAIF01005475.1 | 13.48  | 18.33  | 9.08   | 16.06  | 28.59 | 48.84  |
| GAIF01005477.1 | 0      | 0      | 0      | 0      | 0     | 0.22   |
| GAIF01005478.1 | 0      | 0.13   | 0.25   | 0      | 0     | 0      |
| GAIF01005479.1 | 0.62   | 0      | 0      | 0      | 0     | 0      |
| GAIF01005480.1 | 0.14   | 0.04   | 0.04   | 0      | 0.09  | 0      |
| GAIF01005482.1 | 18     | 18.68  | 0      | 24.35  | 12.61 | 0      |
| GAIF01005485.1 | 0.06   | 0.13   | 0      | 3.98   | 0.59  | 0.13   |
| GAIF01005487.1 | 8.75   | 11.91  | 2.11   | 6.19   | 1.11  | 0.55   |
| GAIF01005489.1 | 1.94   | 1.28   | 1.34   | 8.88   | 8.45  | 0.11   |
| GAIF01005490.1 | 1.49   | 0.58   | 0.43   | 1.03   | 3.91  | 1.61   |
| GAIF01005491.1 | 0.2    | 0.21   | 0.22   | 0.92   | 1.43  | 0.22   |
| GAIF01005493.1 | 140.45 | 18.11  | 68.39  | 126.39 | 10.21 | 194.32 |
| GAIF01005496.1 | 27.77  | 44.56  | 27.22  | 28.9   | 29.5  | 6.83   |
| GAIF01005497.1 | 0.06   | 0      | 0.13   | 0      | 0     | 0      |
| GAIF01005498.1 | 78.44  | 35.03  | 25.73  | 0.32   | 0.73  | 1.09   |
| GAIF01005500.1 | 3.87   | 0.08   | 0.15   | 2.7    | 2.44  | 6.4    |
| GAIF01005501.1 | 0.07   | 0      | 0      | 0.17   | 0.62  | 0      |
| GAIF01005502.1 | 0.02   | 0      | 0      | 0.05   | 0.11  | 0      |
| GAIF01005503.1 | 0.07   | 0      | 0.08   | 1.09   | 3.03  | 0.4    |
| GAIF01005504.1 | 0.04   | 0      | 0.05   | 0.05   | 0     | 0      |
| GAIF01005505.1 | 8.22   | 10.98  | 6      | 24.08  | 32.14 | 3.05   |
| GAIF01005506.1 | 0.75   | 0.08   | 0.04   | 1.44   | 8.67  | 0.79   |
| GAIF01005508.1 | 0.38   | 0      | 0      | 1.44   | 0.69  | 0.31   |
| GAIF01005510.1 | 7.23   | 137.78 | 271.93 | 0      | 0     | 13.75  |
| GAIF01005511.1 | 58.35  | 60.34  | 35.73  | 75.09  | 63.93 | 15.09  |
| GAIF01005513.1 | 0.14   | 0.24   | 0      | 1.09   | 3.3   | 0      |
| GAIF01005516.1 | 0      | 0      | 0      | 0      | 1.17  | 0      |
| GAIF01005517.1 | 0.11   | 0      | 0.32   | 0.07   | 0.2   | 0      |
| GAIF01005518.1 | 0      | 0      | 0      | 0      | 0     | 0.25   |
| GAIF01005519.1 | 0.22   | 0.24   | 0.24   | 0.38   | 0.66  | 0      |
| GAIF01005520.1 | 0.3    | 0.09   | 0.16   | 0.06   | 0.03  | 0.1    |

|                |        |        |         |        |        |         |
|----------------|--------|--------|---------|--------|--------|---------|
| GAIF01005523.1 | 0      | 0      | 0       | 0      | 0.02   | 0       |
| GAIF01005524.1 | 0.04   | 0.03   | 0       | 0.01   | 0      | 0       |
| GAIF01005525.1 | 2.18   | 3.15   | 4.39    | 1.12   | 3.39   | 1.47    |
| GAIF01005526.1 | 4.03   | 7.17   | 7.39    | 12.33  | 9.9    | 2.64    |
| GAIF01005528.1 | 444.76 | 201.45 | 299.82  | 532.36 | 401.17 | 2211.06 |
| GAIF01005529.1 | 4.57   | 4.02   | 4.49    | 6.47   | 5.19   | 4.23    |
| GAIF01005530.1 | 0.27   | 0      | 0.07    | 1.17   | 4.19   | 0.1     |
| GAIF01005531.1 | 0.03   | 0      | 0       | 0.07   | 0.38   | 0       |
| GAIF01005532.1 | 2.67   | 2.5    | 4.34    | 0.32   | 0.11   | 0.2     |
| GAIF01005534.1 | 12.3   | 15.52  | 10.35   | 91.99  | 72.28  | 9.97    |
| GAIF01005536.1 | 32.44  | 55.41  | 96.71   | 21.01  | 27.38  | 69.54   |
| GAIF01005537.1 | 3.27   | 2.95   | 3.72    | 7.73   | 6.79   | 4.11    |
| GAIF01005538.1 | 0.32   | 0.24   | 0.11    | 0.67   | 0.37   | 0.45    |
| GAIF01005540.1 | 1.6    | 1.25   | 2.03    | 0.38   | 0.89   | 0.18    |
| GAIF01005543.1 | 541.46 | 430.67 | 1023.54 | 0.43   | 1.43   | 1.21    |
| GAIF01005544.1 | 0      | 0      | 0.19    | 0      | 0      | 0       |
| GAIF01005546.1 | 0      | 0      | 0       | 0      | 0.19   | 0       |
| GAIF01005547.1 | 0      | 0      | 0       | 0      | 0      | 2.75    |
| GAIF01005550.1 | 0      | 0.58   | 0.5     | 0      | 0      | 0.19    |
| GAIF01005551.1 | 1.38   | 1.25   | 2       | 1.24   | 0.46   | 0.71    |
| GAIF01005552.1 | 7.15   | 3.79   | 4.9     | 23.14  | 42.8   | 31.67   |
| GAIF01005554.1 | 0.17   | 0      | 0       | 0      | 0.29   | 0.05    |
| GAIF01005556.1 | 0.75   | 0.46   | 0.28    | 2.66   | 7.26   | 0.13    |
| GAIF01005557.1 | 27.05  | 27.39  | 47.81   | 43.28  | 21.47  | 40.1    |
| GAIF01005559.1 | 0.66   | 0.88   | 0.3     | 2.55   | 4.24   | 0.15    |
| GAIF01005560.1 | 0      | 0      | 0       | 0      | 0.08   | 0       |
| GAIF01005562.1 | 15.43  | 16.79  | 33.19   | 60.36  | 53.09  | 22.87   |
| GAIF01005563.1 | 9.23   | 7.63   | 8.94    | 19.02  | 13.97  | 5.88    |
| GAIF01005565.1 | 106.79 | 76.15  | 147.9   | 246.68 | 224.38 | 515.4   |
| GAIF01005566.1 | 0.66   | 0.16   | 0       | 2.84   | 7.7    | 0       |
| GAIF01005568.1 | 0      | 1.78   | 1.53    | 0      | 0.15   | 6.02    |
| GAIF01005569.1 | 37.31  | 19.61  | 39.41   | 31.3   | 30.12  | 72.54   |
| GAIF01005570.1 | 11.08  | 7.94   | 7.79    | 29.43  | 33.36  | 5.23    |
| GAIF01005572.1 | 0      | 0.17   | 0       | 1.41   | 8.42   | 0.17    |
| GAIF01005573.1 | 930.09 | 722.34 | 1140.09 | 848.13 | 483.56 | 2500.86 |
| GAIF01005574.1 | 0.48   | 0.12   | 0.08    | 3.72   | 16.17  | 0.08    |
| GAIF01005577.1 | 1.32   | 1.98   | 0.24    | 2.63   | 20.57  | 0.06    |
| GAIF01005578.1 | 5.09   | 9.71   | 21.52   | 0.11   | 0.17   | 1.14    |
| GAIF01005579.1 | 59.51  | 50.81  | 72.59   | 54.98  | 44.41  | 45.79   |
| GAIF01005580.1 | 0.21   | 0.04   | 0.23    | 0.95   | 4.77   | 0.08    |
| GAIF01005581.1 | 0      | 0      | 0       | 0.55   | 0.53   | 0       |
| GAIF01005582.1 | 0      | 0      | 0       | 0.2    | 0.21   | 0       |
| GAIF01005583.1 | 0      | 0      | 0       | 0      | 0.42   | 0       |
| GAIF01005584.1 | 3.61   | 1.43   | 1.43    | 2.68   | 0.89   | 1.5     |

|                |        |        |        |         |        |        |
|----------------|--------|--------|--------|---------|--------|--------|
| GAIF01005585.1 | 0      | 0      | 0      | 0.11    | 0      | 0      |
| GAIF01005586.1 | 0      | 0.29   | 0      | 0.15    | 0.32   | 0.29   |
| GAIF01005587.1 | 0      | 0.04   | 0      | 0.89    | 1.3    | 0      |
| GAIF01005589.1 | 0.43   | 0.11   | 0.07   | 0.04    | 0.06   | 0      |
| GAIF01005590.1 | 0.22   | 0.12   | 0      | 0.72    | 1.89   | 0      |
| GAIF01005591.1 | 1.94   | 4.34   | 5.04   | 6.71    | 3.7    | 1.78   |
| GAIF01005592.1 | 2.25   | 1.36   | 1.87   | 0.47    | 0      | 0.08   |
| GAIF01005593.1 | 0.19   | 0.08   | 0.02   | 1.41    | 5.21   | 0.24   |
| GAIF01005594.1 | 0      | 0.04   | 0.08   | 0.47    | 0      | 0.04   |
| GAIF01005595.1 | 93.43  | 6.09   | 6.15   | 1.7     | 1.55   | 7.08   |
| GAIF01005596.1 | 198.43 | 276.87 | 289.62 | 261.86  | 189.78 | 17.86  |
| GAIF01005597.1 | 45.25  | 43.45  | 97.07  | 141.3   | 100.77 | 185.6  |
| GAIF01005598.1 | 7.22   | 6.6    | 5.42   | 33.23   | 43.71  | 3.35   |
| GAIF01005599.1 | 0      | 3.43   | 1.5    | 0       | 0.05   | 0      |
| GAIF01005601.1 | 22.4   | 16.16  | 13.36  | 44.83   | 40.25  | 14.43  |
| GAIF01005602.1 | 159.52 | 85.32  | 64.78  | 130.06  | 126.62 | 64.81  |
| GAIF01005603.1 | 14.6   | 10.19  | 7.72   | 32.83   | 32.75  | 8.28   |
| GAIF01005605.1 | 32.2   | 33.41  | 25.38  | 71.25   | 84.68  | 24.77  |
| GAIF01005606.1 | 0      | 0.05   | 0      | 0       | 0      | 0      |
| GAIF01005607.1 | 8.11   | 8.34   | 10.89  | 13.55   | 7.03   | 5.84   |
| GAIF01005608.1 | 17.83  | 22.25  | 13.33  | 20.1    | 18.79  | 2.32   |
| GAIF01005610.1 | 8.98   | 5.92   | 2.99   | 4.26    | 4.62   | 7.91   |
| GAIF01005611.1 | 107.63 | 23.34  | 5.24   | 1448.64 | 767.79 | 2.26   |
| GAIF01005613.1 | 0      | 0      | 0      | 0.23    | 0.48   | 0      |
| GAIF01005615.1 | 8.43   | 7.33   | 2.19   | 4.8     | 1.94   | 0      |
| GAIF01005616.1 | 3.9    | 3.8    | 1.78   | 0.24    | 0.24   | 0      |
| GAIF01005619.1 | 11.04  | 18     | 12.5   | 16.06   | 11.31  | 4.2    |
| GAIF01005621.1 | 0      | 0.05   | 0      | 0       | 0.04   | 0      |
| GAIF01005622.1 | 0.35   | 0      | 0.1    | 0.23    | 1.99   | 0      |
| GAIF01005623.1 | 0      | 0.09   | 0      | 0.09    | 0.63   | 0.04   |
| GAIF01005625.1 | 0      | 0      | 0      | 1.4     | 7.55   | 0      |
| GAIF01005626.1 | 102.4  | 61.76  | 38.32  | 169.67  | 181.22 | 116.28 |
| GAIF01005627.1 | 0      | 0      | 0.08   | 0       | 0      | 0      |
| GAIF01005629.1 | 0      | 0      | 0      | 0.31    | 6.08   | 0      |
| GAIF01005631.1 | 8.87   | 16.33  | 8.17   | 52.51   | 48.67  | 1.28   |
| GAIF01005632.1 | 0.44   | 0.19   | 0.1    | 2.97    | 15.88  | 0.49   |
| GAIF01005633.1 | 5.78   | 14.16  | 7.99   | 18.99   | 20.55  | 2.45   |
| GAIF01005634.1 | 0.8    | 0.87   | 0      | 8.53    | 34.87  | 0.74   |
| GAIF01005635.1 | 15.02  | 15.98  | 6.41   | 22.77   | 55.96  | 35.08  |
| GAIF01005638.1 | 20     | 21.74  | 30.34  | 49.79   | 34.62  | 9.08   |
| GAIF01005639.1 | 13.64  | 21.25  | 17.76  | 41.04   | 21.64  | 7.31   |
| GAIF01005642.1 | 4.64   | 4.02   | 1.17   | 11.66   | 13.56  | 0.43   |
| GAIF01005643.1 | 135.86 | 151.51 | 146.32 | 16.92   | 5.74   | 4.27   |
| GAIF01005644.1 | 0      | 0      | 0      | 0       | 0.16   | 0      |

|                |         |         |         |         |         |         |
|----------------|---------|---------|---------|---------|---------|---------|
| GAIF01005646.1 | 0       | 0       | 0       | 0       | 0.29    | 0       |
| GAIF01005647.1 | 0.03    | 0       | 0       | 0.08    | 0.08    | 0.04    |
| GAIF01005648.1 | 0       | 0       | 0       | 0.95    | 3.07    | 0.18    |
| GAIF01005649.1 | 0       | 0       | 0.07    | 0       | 0       | 0       |
| GAIF01005650.1 | 2819.37 | 1126.26 | 2077.21 | 1480.8  | 1333.87 | 5590.27 |
| GAIF01005651.1 | 56.92   | 26.16   | 18.17   | 58.15   | 58.39   | 63.87   |
| GAIF01005652.1 | 0.19    | 0       | 0       | 0       | 2.4     | 0.05    |
| GAIF01005653.1 | 0.62    | 0.41    | 0       | 1.3     | 7.14    | 0       |
| GAIF01005654.1 | 0.19    | 0.04    | 0       | 0.26    | 1.19    | 1.17    |
| GAIF01005655.1 | 27.81   | 21.08   | 14.43   | 46.83   | 49.17   | 9.07    |
| GAIF01005656.1 | 0       | 0       | 0.32    | 0       | 0       | 0.22    |
| GAIF01005658.1 | 2712.7  | 3791.04 | 4291.24 | 1994.06 | 858.9   | 597.36  |
| GAIF01005660.1 | 0.11    | 0.03    | 0       | 0       | 2.21    | 0       |
| GAIF01005662.1 | 19.75   | 29.93   | 25.44   | 19.93   | 16.11   | 6.02    |
| GAIF01005663.1 | 333.28  | 283.21  | 383.35  | 874     | 498.1   | 610.42  |
| GAIF01005666.1 | 0       | 0       | 0       | 0       | 1.21    | 0       |
| GAIF01005667.1 | 0.44    | 0.1     | 0.34    | 0.15    | 0.11    | 0.39    |
| GAIF01005668.1 | 3.18    | 4.32    | 8.29    | 8.3     | 3.34    | 9.63    |
| GAIF01005669.1 | 0.07    | 27.66   | 108.7   | 0.08    | 1.41    | 84.64   |
| GAIF01005670.1 | 0       | 0.2     | 0.82    | 0       | 0       | 0       |
| GAIF01005673.1 | 0.08    | 0       | 0       | 0       | 0       | 0       |
| GAIF01005675.1 | 1.53    | 2.81    | 1.93    | 7.36    | 13.14   | 4.4     |
| GAIF01005679.1 | 0.08    | 0.07    | 0       | 0.46    | 0.29    | 0.18    |
| GAIF01005680.1 | 9.44    | 3.39    | 1.17    | 1.5     | 0.59    | 0.05    |
| GAIF01005681.1 | 0       | 0       | 0       | 0       | 0.74    | 0       |
| GAIF01005682.1 | 0.33    | 0.4     | 0.49    | 0.1     | 0.86    | 0.49    |
| GAIF01005683.1 | 1.45    | 0.26    | 0.53    | 0.14    | 0.14    | 0       |
| GAIF01005684.1 | 0.02    | 0       | 0       | 0       | 0       | 0       |
| GAIF01005687.1 | 1.83    | 5.05    | 0.05    | 3.11    | 4.33    | 0.01    |
| GAIF01005689.1 | 7.48    | 4.18    | 2.17    | 40.52   | 45.88   | 0.59    |
| GAIF01005691.1 | 2.47    | 5.63    | 1.55    | 14.07   | 16.56   | 0.26    |
| GAIF01005692.1 | 84.43   | 92.66   | 10.24   | 17.64   | 32.55   | 15.89   |
| GAIF01005693.1 | 5.09    | 7.21    | 0       | 3.14    | 4.68    | 0       |
| GAIF01005694.1 | 0.09    | 0.1     | 0.1     | 0.38    | 0.22    | 0       |
| GAIF01005696.1 | 0       | 0       | 0       | 0       | 0.21    | 0       |
| GAIF01005700.1 | 0       | 0       | 0       | 0.33    | 0.76    | 0.62    |
| GAIF01005702.1 | 68.3    | 2.94    | 3.62    | 8.04    | 0.71    | 0.19    |
| GAIF01005703.1 | 0       | 0       | 0       | 0.08    | 0       | 0       |
| GAIF01005704.1 | 5.51    | 0       | 1.05    | 0.4     | 0.49    | 0.77    |
| GAIF01005705.1 | 9.82    | 6.85    | 8.06    | 23.89   | 20.7    | 7.76    |
| GAIF01005706.1 | 0       | 0       | 0       | 0.14    | 0.11    | 0       |
| GAIF01005707.1 | 0.36    | 0       | 0       | 0       | 0       | 0       |
| GAIF01005708.1 | 0.23    | 0       | 0       | 0.26    | 0.96    | 0       |
| GAIF01005709.1 | 30.09   | 30.3    | 14.33   | 42.13   | 35.61   | 13.15   |

|                |         |         |         |        |        |        |
|----------------|---------|---------|---------|--------|--------|--------|
| GAIF01005710.1 | 0.11    | 0       | 0       | 0.34   | 0.8    | 126.22 |
| GAIF01005711.1 | 0       | 10.67   | 0       | 0      | 0      | 0      |
| GAIF01005712.1 | 36.55   | 28.35   | 21.44   | 9.67   | 13.46  | 7.48   |
| GAIF01005713.1 | 0.08    | 0       | 0.09    | 0      | 0      | 0      |
| GAIF01005714.1 | 0       | 0       | 0       | 0.11   | 0      | 0      |
| GAIF01005715.1 | 0.23    | 0.07    | 0.07    | 0.37   | 1.65   | 0.14   |
| GAIF01005716.1 | 2198.73 | 4025.92 | 4758.35 | 243.63 | 222.65 | 334.64 |
| GAIF01005717.1 | 32.2    | 9.43    | 11.09   | 32.09  | 13.54  | 6.45   |
| GAIF01005718.1 | 1.23    | 3.61    | 0.41    | 5.28   | 3.55   | 0      |
| GAIF01005719.1 | 0.18    | 0.2     | 0.2     | 0.14   | 0.07   | 0.07   |
| GAIF01005720.1 | 0       | 0       | 0       | 0      | 0.09   | 0      |
| GAIF01005722.1 | 0       | 0       | 0       | 0      | 0.04   | 0      |
| GAIF01005723.1 | 166.39  | 58.74   | 33.72   | 198.42 | 295.32 | 200.17 |
| GAIF01005725.1 | 107.29  | 134.93  | 129.83  | 73.77  | 58.72  | 58.52  |
| GAIF01005727.1 | 6.42    | 3.12    | 3.71    | 16.08  | 11.38  | 3.72   |
| GAIF01005728.1 | 0       | 0       | 0       | 0      | 0.08   | 0      |
| GAIF01005729.1 | 0.7     | 0.19    | 0.06    | 0.59   | 4.39   | 0      |
| GAIF01005733.1 | 0.07    | 0.04    | 0.04    | 0.17   | 0.23   | 0      |
| GAIF01005735.1 | 5.41    | 3.36    | 1.13    | 11.05  | 25.07  | 0.14   |
| GAIF01005737.1 | 0.11    | 0       | 0       | 0.75   | 2.6    | 0.71   |
| GAIF01005739.1 | 0.89    | 1.05    | 0.35    | 1.78   | 1.94   | 0.53   |
| GAIF01005740.1 | 3.69    | 3.91    | 4.66    | 4.32   | 2.08   | 1.15   |
| GAIF01005741.1 | 0.08    | 0.04    | 0.04    | 0.09   | 0.05   | 0.04   |
| GAIF01005742.1 | 0       | 0.09    | 0       | 0.12   | 0      | 0      |
| GAIF01005743.1 | 1.34    | 0.36    | 0.37    | 1.56   | 7.67   | 0.18   |
| GAIF01005744.1 | 0.28    | 0.15    | 0.15    | 1.6    | 0.17   | 0      |
| GAIF01005745.1 | 0       | 0       | 0       | 0      | 0      | 0.16   |
| GAIF01005746.1 | 0       | 0       | 0       | 0      | 0.07   | 0      |
| GAIF01005747.1 | 16.18   | 16.18   | 12.21   | 98.19  | 53.06  | 8.65   |
| GAIF01005749.1 | 0.04    | 0.04    | 0.05    | 0      | 0.03   | 0      |
| GAIF01005750.1 | 0       | 0       | 0       | 0.06   | 0.17   | 0      |
| GAIF01005751.1 | 227.75  | 271.43  | 282.3   | 171.84 | 111.8  | 87.68  |
| GAIF01005753.1 | 0       | 0       | 0       | 0.76   | 4.09   | 0      |
| GAIF01005754.1 | 0       | 0       | 0       | 0      | 0.8    | 0      |
| GAIF01005755.1 | 0.83    | 0       | 0.18    | 0      | 0.31   | 0      |
| GAIF01005756.1 | 0.46    | 0.06    | 0       | 0      | 0.27   | 0      |
| GAIF01005757.1 | 32.83   | 18.28   | 22.99   | 61.76  | 52.22  | 22.96  |
| GAIF01005758.1 | 3.89    | 2.14    | 1.37    | 10.46  | 21.94  | 2.15   |
| GAIF01005760.1 | 19.39   | 7.39    | 58.27   | 4.75   | 4.35   | 9.68   |
| GAIF01005761.1 | 110.11  | 137.09  | 325.52  | 108.25 | 116.07 | 213    |
| GAIF01005763.1 | 19.71   | 20.02   | 15.52   | 9.78   | 2.65   | 1.57   |
| GAIF01005764.1 | 0       | 0       | 0       | 0.52   | 0      | 0      |
| GAIF01005765.1 | 0.14    | 0       | 0.71    | 0      | 0      | 0      |
| GAIF01005766.1 | 11.39   | 4.45    | 5.08    | 3.26   | 4.96   | 2.38   |

|                |       |       |       |       |       |       |
|----------------|-------|-------|-------|-------|-------|-------|
| GAIF01005767.1 | 1.07  | 0.39  | 0     | 1.32  | 1.37  | 0     |
| GAIF01005768.1 | 0.04  | 0     | 0     | 0.02  | 0.23  | 0.01  |
| GAIF01005769.1 | 0.11  | 0.21  | 0.24  | 0     | 0     | 0     |
| GAIF01005770.1 | 0     | 0.04  | 0     | 0.14  | 0.05  | 0.14  |
| GAIF01005771.1 | 17.22 | 16.52 | 14.47 | 35.46 | 54.57 | 6.47  |
| GAIF01005772.1 | 0     | 0.05  | 0     | 0.22  | 0.45  | 0.1   |
| GAIF01005773.1 | 16.21 | 9.24  | 2.39  | 22.21 | 38.25 | 1.54  |
| GAIF01005775.1 | 0     | 0     | 0     | 0     | 0.18  | 0     |
| GAIF01005777.1 | 0     | 0     | 0     | 0.19  | 0     | 0     |
| GAIF01005778.1 | 42.8  | 26.12 | 26    | 33.58 | 37.72 | 28.94 |
| GAIF01005780.1 | 0.49  | 1.2   | 0.49  | 3.48  | 0.3   | 0.27  |
| GAIF01005782.1 | 4.06  | 1.84  | 3.47  | 9.7   | 3.8   | 3.36  |
| GAIF01005783.1 | 0.6   | 0.43  | 0     | 2.79  | 4.69  | 0.55  |
| GAIF01005784.1 | 0.86  | 1.24  | 0.47  | 7.78  | 0.34  | 0.47  |
| GAIF01005786.1 | 0     | 0     | 0     | 0     | 0.61  | 0     |
| GAIF01005787.1 | 7.92  | 7.33  | 4.66  | 17.8  | 21.3  | 10.89 |
| GAIF01005788.1 | 0.03  | 0.07  | 0     | 0     | 0.08  | 0     |
| GAIF01005789.1 | 0.48  | 0.26  | 0     | 1.94  | 8.99  | 2.45  |
| GAIF01005790.1 | 2.01  | 1.07  | 1.67  | 1.04  | 0.38  | 0.25  |
| GAIF01005791.1 | 0.32  | 0     | 0     | 0.73  | 1.26  | 0     |
| GAIF01005792.1 | 0.58  | 0.72  | 0.08  | 0.86  | 1.71  | 0     |
| GAIF01005793.1 | 18.27 | 0.51  | 0.48  | 3.85  | 1.48  | 0.19  |
| GAIF01005795.1 | 0     | 0.17  | 0     | 2.62  | 7.92  | 0     |
| GAIF01005798.1 | 8.65  | 16.9  | 5.51  | 11.89 | 11.09 | 1.21  |
| GAIF01005799.1 | 3.97  | 4.44  | 3.17  | 1.12  | 0.87  | 0     |
| GAIF01005800.1 | 57.64 | 31.82 | 16.94 | 84.08 | 81.18 | 8.5   |
| GAIF01005802.1 | 1.75  | 1.71  | 0     | 10.16 | 15.79 | 0     |
| GAIF01005803.1 | 0     | 0     | 0     | 0     | 26.21 | 0     |
| GAIF01005804.1 | 7.7   | 1.09  | 0.88  | 25.42 | 72.03 | 39.23 |
| GAIF01005805.1 | 0     | 1.24  | 1.76  | 0     | 0     | 0.08  |
| GAIF01005806.1 | 0     | 0     | 0     | 0     | 0.16  | 0     |
| GAIF01005808.1 | 0.18  | 0.22  | 0     | 0.06  | 0.18  | 0     |
| GAIF01005809.1 | 1.13  | 0     | 0.34  | 0.84  | 0     | 0.79  |
| GAIF01005810.1 | 0.07  | 0     | 0     | 0     | 0     | 0     |
| GAIF01005816.1 | 2.82  | 0.95  | 0.53  | 15.46 | 31.05 | 0.55  |
| GAIF01005817.1 | 0     | 0     | 0     | 0     | 0.38  | 0.15  |
| GAIF01005818.1 | 9.26  | 7.18  | 5.3   | 33.74 | 40.81 | 4.02  |
| GAIF01005819.1 | 1.65  | 0.92  | 0.21  | 1.15  | 2.75  | 0.07  |
| GAIF01005820.1 | 3.39  | 1.33  | 0.64  | 4.14  | 16.3  | 0.71  |
| GAIF01005821.1 | 0     | 0     | 0     | 0     | 0.03  | 0     |
| GAIF01005822.1 | 2.78  | 3.68  | 1.21  | 6.49  | 6.77  | 0.15  |
| GAIF01005823.1 | 1.59  | 1.9   | 0.92  | 2.66  | 3.38  | 1.21  |
| GAIF01005824.1 | 0.25  | 0     | 0.09  | 0     | 0     | 0.12  |
| GAIF01005828.1 | 0     | 0.18  | 0.09  | 0.28  | 1.95  | 0.27  |

|                |         |         |         |        |        |         |
|----------------|---------|---------|---------|--------|--------|---------|
| GAIF01005829.1 | 99.8    | 130.05  | 176.43  | 245.45 | 103.86 | 43.96   |
| GAIF01005830.1 | 129.1   | 114.84  | 25.14   | 336.91 | 418.79 | 154.38  |
| GAIF01005831.1 | 1.59    | 3.36    | 3.66    | 7.41   | 5.26   | 3.93    |
| GAIF01005834.1 | 0       | 0       | 0.17    | 0      | 0      | 0       |
| GAIF01005835.1 | 0.87    | 0.24    | 0.24    | 3.53   | 4.18   | 0.48    |
| GAIF01005836.1 | 1455.1  | 1211.4  | 2572.53 | 709.37 | 447.41 | 1273.78 |
| GAIF01005837.1 | 119.07  | 177.51  | 17.89   | 111.12 | 205.59 | 14.63   |
| GAIF01005838.1 | 4.42    | 0       | 0.84    | 1.66   | 3.81   | 13.59   |
| GAIF01005839.1 | 2.46    | 1.89    | 2       | 19.34  | 21.14  | 1.61    |
| GAIF01005840.1 | 0.65    | 0.09    | 0       | 1.65   | 3.53   | 0.18    |
| GAIF01005843.1 | 135.69  | 64.09   | 74.25   | 0.18   | 0.37   | 0.85    |
| GAIF01005844.1 | 0.83    | 1.81    | 2.57    | 0.65   | 0.73   | 1.42    |
| GAIF01005845.1 | 1.07    | 2.18    | 0       | 1.73   | 3.13   | 0       |
| GAIF01005846.1 | 0       | 0.52    | 0       | 0      | 0      | 0       |
| GAIF01005847.1 | 3.55    | 0.79    | 1.8     | 1.75   | 6.51   | 1.79    |
| GAIF01005848.1 | 4.54    | 2.4     | 2.99    | 0.9    | 0.55   | 0.64    |
| GAIF01005850.1 | 0       | 0       | 0.3     | 0      | 0      | 0       |
| GAIF01005851.1 | 0.41    | 0.18    | 0       | 1.42   | 2.54   | 0.63    |
| GAIF01005852.1 | 15.81   | 14.82   | 11.29   | 61.54  | 109.59 | 33.03   |
| GAIF01005855.1 | 10.74   | 19.11   | 14.5    | 57.6   | 38.6   | 9.03    |
| GAIF01005856.1 | 0.7     | 0.63    | 0.77    | 0.34   | 0.49   | 1.41    |
| GAIF01005857.1 | 0       | 0       | 0       | 0.28   | 1.22   | 0.37    |
| GAIF01005858.1 | 82.94   | 103.72  | 63.69   | 129.33 | 74.07  | 16.32   |
| GAIF01005859.1 | 0       | 0.04    | 0       | 0      | 0.12   | 0       |
| GAIF01005860.1 | 0       | 0       | 0       | 0      | 0.27   | 0       |
| GAIF01005863.1 | 19.97   | 11.94   | 15.4    | 33.45  | 17.75  | 16.54   |
| GAIF01005865.1 | 3.68    | 1.94    | 0.49    | 17.08  | 32.04  | 0.37    |
| GAIF01005867.1 | 0.04    | 0.09    | 0       | 0.06   | 0.29   | 0       |
| GAIF01005868.1 | 38.58   | 42.36   | 31.59   | 98.86  | 59.26  | 15.36   |
| GAIF01005869.1 | 75.41   | 38.59   | 62.28   | 35.58  | 45.85  | 180.21  |
| GAIF01005871.1 | 57.53   | 62.31   | 69.24   | 106.87 | 86.19  | 49.52   |
| GAIF01005872.1 | 0.18    | 1.06    | 0.1     | 3.39   | 7.98   | 0       |
| GAIF01005873.1 | 0.27    | 0.14    | 0.1     | 0.46   | 1.33   | 0       |
| GAIF01005874.1 | 2.13    | 3.6     | 1.21    | 2.75   | 3.42   | 0       |
| GAIF01005875.1 | 28.51   | 21.57   | 26.84   | 58.65  | 33.71  | 23.53   |
| GAIF01005877.1 | 0       | 0       | 0       | 0.02   | 0      | 0.01    |
| GAIF01005878.1 | 6.53    | 2.92    | 0.6     | 9.28   | 13.06  | 0.12    |
| GAIF01005879.1 | 5.6     | 1.21    | 0.46    | 4.69   | 8.8    | 3.38    |
| GAIF01005880.1 | 1037.82 | 1186.07 | 1829.6  | 548.62 | 520.33 | 1741.72 |
| GAIF01005881.1 | 14      | 14.35   | 5.29    | 51.74  | 110.44 | 16.36   |
| GAIF01005883.1 | 0       | 5.52    | 1.06    | 0      | 0.95   | 0       |
| GAIF01005884.1 | 0.09    | 0       | 0       | 0      | 0.3    | 0       |
| GAIF01005885.1 | 12.21   | 7.3     | 9.43    | 19.81  | 31.96  | 6.97    |
| GAIF01005887.1 | 0       | 0       | 0       | 0.32   | 0.4    | 0.16    |

|                |         |         |        |         |         |        |
|----------------|---------|---------|--------|---------|---------|--------|
| GAIF01005888.1 | 9.05    | 12.94   | 15.62  | 42.67   | 30.22   | 10.55  |
| GAIF01005891.1 | 6.72    | 2.73    | 0.54   | 4.7     | 8.71    | 3.11   |
| GAIF01005892.1 | 0.24    | 0.19    | 0      | 0.2     | 0.87    | 0      |
| GAIF01005893.1 | 2.46    | 1.62    | 2.68   | 2.32    | 1.55    | 3.33   |
| GAIF01005894.1 | 0       | 0       | 0.11   | 0       | 0       | 0      |
| GAIF01005895.1 | 100.02  | 83.43   | 84.4   | 33.93   | 17.5    | 16.96  |
| GAIF01005896.1 | 24.21   | 3.24    | 1.39   | 60.55   | 279.99  | 29.78  |
| GAIF01005897.1 | 17.3    | 21.83   | 27.28  | 53.06   | 52.91   | 10.88  |
| GAIF01005898.1 | 0       | 0       | 0      | 0       | 0       | 0.07   |
| GAIF01005899.1 | 32.18   | 23.83   | 21.87  | 62.52   | 67.82   | 49.54  |
| GAIF01005900.1 | 12.44   | 12.38   | 11.81  | 28.02   | 16.48   | 3.95   |
| GAIF01005901.1 | 0       | 0.03    | 0      | 0.1     | 0.18    | 0      |
| GAIF01005904.1 | 9.47    | 10.75   | 10.39  | 33.4    | 18.45   | 4.57   |
| GAIF01005906.1 | 0       | 0       | 0      | 0       | 1.41    | 0.42   |
| GAIF01005907.1 | 23.02   | 33.23   | 8.14   | 36.44   | 31.55   | 2.35   |
| GAIF01005909.1 | 1900.91 | 5973.33 | 5687.4 | 1959.98 | 1445.61 | 821.91 |
| GAIF01005910.1 | 36.39   | 13.89   | 7.79   | 0       | 0.05    | 0.13   |
| GAIF01005911.1 | 0.06    | 0.03    | 0.03   | 1.14    | 4.53    | 0.14   |
| GAIF01005912.1 | 20.39   | 15.05   | 32.68  | 62.61   | 82.63   | 55.18  |
| GAIF01005913.1 | 0       | 0       | 0.1    | 0       | 0       | 0.1    |
| GAIF01005914.1 | 1.58    | 2.12    | 2.87   | 2.85    | 1.72    | 0.82   |
| GAIF01005916.1 | 1.18    | 0       | 0      | 3.33    | 6.47    | 0.32   |
| GAIF01005917.1 | 50.88   | 34.48   | 57.01  | 43.28   | 23.89   | 38.66  |
| GAIF01005918.1 | 11.77   | 10.13   | 8.62   | 23.06   | 23.4    | 3.06   |
| GAIF01005919.1 | 0.73    | 0.53    | 0.36   | 2.21    | 7.7     | 0.8    |
| GAIF01005920.1 | 0       | 0       | 0      | 0       | 0.14    | 0      |
| GAIF01005921.1 | 0       | 0       | 0      | 0       | 0       | 0.05   |
| GAIF01005922.1 | 0       | 0       | 0      | 0       | 0.06    | 0      |
| GAIF01005924.1 | 0.19    | 0       | 0.11   | 0.22    | 2.1     | 0      |
| GAIF01005925.1 | 0.09    | 0.03    | 0      | 0.8     | 5.43    | 0.04   |
| GAIF01005926.1 | 0       | 0       | 0      | 0       | 0.33    | 0      |
| GAIF01005927.1 | 0       | 0       | 0.02   | 0       | 0       | 0      |
| GAIF01005928.1 | 1.34    | 2.24    | 1.43   | 0.89    | 0.63    | 0.37   |
| GAIF01005930.1 | 0       | 0       | 0      | 0       | 0.01    | 0      |
| GAIF01005931.1 | 1.89    | 1.83    | 1.48   | 7.99    | 8.76    | 0.37   |
| GAIF01005933.1 | 0.36    | 1.57    | 1.19   | 0.21    | 0       | 0      |
| GAIF01005936.1 | 3.18    | 4.03    | 0      | 14.82   | 8.01    | 0      |
| GAIF01005937.1 | 20.06   | 31.22   | 29.57  | 34.35   | 22.37   | 9.18   |
| GAIF01005938.1 | 1.15    | 3.05    | 3.62   | 3.83    | 3.17    | 0.64   |
| GAIF01005939.1 | 0.16    | 0       | 0      | 0       | 0       | 0      |
| GAIF01005940.1 | 500.14  | 186.02  | 278.37 | 100.31  | 51.31   | 104.9  |
| GAIF01005941.1 | 0       | 0       | 0      | 0       | 0.19    | 0      |
| GAIF01005942.1 | 0.11    | 0       | 0      | 0       | 0       | 0      |
| GAIF01005943.1 | 121.88  | 207.04  | 64.61  | 184.87  | 181.23  | 8.75   |



|                |       |       |       |        |        |        |
|----------------|-------|-------|-------|--------|--------|--------|
| GAIF01005944.1 | 7.04  | 12.63 | 14.23 | 15.17  | 8.6    | 7.63   |
| GAIF01005946.1 | 57.2  | 0.62  | 27    | 144.86 | 82.95  | 104.18 |
| GAIF01005947.1 | 3.84  | 4.11  | 2.14  | 22.26  | 31.63  | 2.34   |
| GAIF01005948.1 | 20.25 | 13.7  | 27.24 | 58.74  | 46.9   | 22.09  |
| GAIF01005950.1 | 1.9   | 2.69  | 1.46  | 4.05   | 5.57   | 1.19   |
| GAIF01005951.1 | 0     | 0     | 0     | 0      | 0      | 0.12   |
| GAIF01005952.1 | 0     | 0     | 0     | 0      | 25.13  | 0      |
| GAIF01005955.1 | 1.72  | 0.07  | 0.27  | 11.42  | 77.24  | 5.22   |
| GAIF01005956.1 | 0.21  | 0     | 0     | 0.12   | 0      | 0      |
| GAIF01005958.1 | 15.91 | 9.65  | 9.75  | 47.11  | 55.07  | 22.55  |
| GAIF01005960.1 | 0.7   | 0.69  | 0.41  | 0.53   | 0.33   | 0.6    |
| GAIF01005961.1 | 17.43 | 20.31 | 20.64 | 13.77  | 10.68  | 8      |
| GAIF01005962.1 | 1.39  | 0.15  | 0.06  | 7.37   | 32.23  | 2.09   |
| GAIF01005963.1 | 0     | 0.09  | 0     | 0      | 0.05   | 0      |
| GAIF01005964.1 | 0     | 0     | 0     | 0.13   | 0.77   | 0      |
| GAIF01005965.1 | 1.69  | 0.61  | 0     | 7.18   | 20.29  | 0      |
| GAIF01005966.1 | 10.17 | 15.16 | 5.1   | 38.89  | 62.55  | 2.78   |
| GAIF01005967.1 | 0.44  | 0.16  | 0.32  | 0      | 0      | 0      |
| GAIF01005968.1 | 0     | 0     | 0     | 0.47   | 4.41   | 0      |
| GAIF01005969.1 | 9.3   | 10.16 | 7.23  | 25.29  | 31.94  | 1.65   |
| GAIF01005970.1 | 10.67 | 14.18 | 17.68 | 25.61  | 11.97  | 8.57   |
| GAIF01005971.1 | 29.82 | 49.36 | 22.2  | 77.65  | 70.49  | 5.16   |
| GAIF01005972.1 | 14.69 | 5.11  | 5.65  | 8.57   | 2.6    | 3.78   |
| GAIF01005973.1 | 0     | 0     | 0     | 0      | 0.02   | 0      |
| GAIF01005974.1 | 0.1   | 0.06  | 0.11  | 0      | 0.37   | 0.06   |
| GAIF01005977.1 | 0     | 0     | 0.11  | 0.36   | 0      | 0.19   |
| GAIF01005978.1 | 0     | 0     | 0     | 0.07   | 0.38   | 0      |
| GAIF01005979.1 | 56.4  | 49.16 | 39.9  | 101.14 | 48.38  | 21.43  |
| GAIF01005980.1 | 0.02  | 0.04  | 0.09  | 0.3    | 1.71   | 0.06   |
| GAIF01005981.1 | 31.36 | 10.69 | 13.39 | 35.22  | 23.35  | 27.17  |
| GAIF01005982.1 | 0     | 0     | 0     | 0.06   | 0.06   | 0      |
| GAIF01005983.1 | 0     | 0.33  | 0.18  | 0.08   | 0.08   | 0      |
| GAIF01005984.1 | 0.15  | 0.33  | 0     | 0.25   | 1.12   | 0.06   |
| GAIF01005985.1 | 1.04  | 0.28  | 0.38  | 3.92   | 22.5   | 1.72   |
| GAIF01005986.1 | 7.66  | 14.47 | 8.78  | 70.98  | 103.13 | 2.68   |
| GAIF01005987.1 | 0.24  | 0     | 0.07  | 0.34   | 0.91   | 0.53   |
| GAIF01005988.1 | 0     | 0     | 0     | 0      | 0.42   | 0      |
| GAIF01005989.1 | 0.63  | 1.03  | 0.69  | 2.94   | 7.8    | 0      |
| GAIF01005990.1 | 0.37  | 0.52  | 0.4   | 0      | 0.81   | 0.32   |
| GAIF01005991.1 | 0     | 0     | 0     | 0.13   | 0.15   | 0      |
| GAIF01005992.1 | 9.05  | 17.18 | 16.09 | 15.83  | 6.13   | 3.37   |
| GAIF01005993.1 | 2.6   | 3.72  | 0     | 8.22   | 22.91  | 1      |
| GAIF01005994.1 | 52.2  | 43.68 | 36.68 | 195.6  | 95.83  | 64.26  |
| GAIF01005995.1 | 0     | 0     | 0     | 0.07   | 0.07   | 0      |

|                |        |        |        |        |        |        |
|----------------|--------|--------|--------|--------|--------|--------|
| GAIF01005996.1 | 70.78  | 93.73  | 59.93  | 65.36  | 92.55  | 15.93  |
| GAIF01005997.1 | 0.04   | 0.07   | 0      | 0.13   | 0.2    | 0.04   |
| GAIF01005998.1 | 0      | 0      | 0      | 0.84   | 5.29   | 0.23   |
| GAIF01005999.1 | 0      | 0.18   | 0      | 0      | 0      | 0      |
| GAIF01006000.1 | 15.48  | 7.86   | 9.01   | 35.99  | 30.42  | 35.55  |
| GAIF01006002.1 | 286.05 | 100.02 | 72.27  | 302.41 | 323.22 | 58.67  |
| GAIF01006003.1 | 17.19  | 33.57  | 55.98  | 54.42  | 21.94  | 19.85  |
| GAIF01006004.1 | 0.18   | 0      | 0      | 0.75   | 2.22   | 0      |
| GAIF01006005.1 | 18.25  | 15.99  | 13.84  | 62.32  | 46.73  | 6.94   |
| GAIF01006006.1 | 1.09   | 0.89   | 0      | 0.95   | 1.97   | 1.66   |
| GAIF01006007.1 | 0.12   | 0.71   | 0.59   | 0.92   | 0.16   | 0      |
| GAIF01006008.1 | 42.61  | 59.06  | 77.13  | 110.6  | 46.55  | 37.82  |
| GAIF01006010.1 | 0      | 0      | 0      | 0      | 0.15   | 0      |
| GAIF01006011.1 | 5.12   | 10.04  | 12.89  | 12.81  | 13.16  | 4.09   |
| GAIF01006012.1 | 0.11   | 0.12   | 0      | 0.12   | 0.26   | 0.24   |
| GAIF01006013.1 | 0.09   | 0.1    | 0.21   | 0.66   | 0.8    | 0.21   |
| GAIF01006015.1 | 0      | 0      | 0.03   | 0      | 0      | 0      |
| GAIF01006016.1 | 0.09   | 0.39   | 0.17   | 0      | 0.48   | 0      |
| GAIF01006017.1 | 0.09   | 0      | 0      | 0.67   | 6.18   | 0.1    |
| GAIF01006018.1 | 2.49   | 3.09   | 0.22   | 30.88  | 49.65  | 1.48   |
| GAIF01006019.1 | 0.1    | 0.11   | 0      | 0      | 0      | 0      |
| GAIF01006020.1 | 0.02   | 0      | 0      | 0      | 0      | 0      |
| GAIF01006021.1 | 21.44  | 10.03  | 6.33   | 27.74  | 62.66  | 14.14  |
| GAIF01006024.1 | 3.38   | 10.2   | 2.61   | 0.87   | 1.65   | 0.14   |
| GAIF01006025.1 | 0.11   | 0      | 0      | 0.13   | 0      | 0.12   |
| GAIF01006026.1 | 0.07   | 0      | 0      | 0.23   | 0.5    | 0      |
| GAIF01006028.1 | 0.22   | 0      | 0.25   | 5.09   | 28.12  | 0.37   |
| GAIF01006029.1 | 0.1    | 0.11   | 0      | 0.7    | 0.49   | 0      |
| GAIF01006030.1 | 0.28   | 0      | 0      | 1.9    | 6.91   | 0.2    |
| GAIF01006031.1 | 0      | 0      | 0      | 0      | 0      | 0.03   |
| GAIF01006032.1 | 0.48   | 1.3    | 0.26   | 2.23   | 0.29   | 0.18   |
| GAIF01006033.1 | 1.65   | 0.9    | 0.34   | 8.22   | 19.21  | 0.97   |
| GAIF01006034.1 | 54.4   | 67.54  | 102.54 | 77.37  | 66.29  | 70.81  |
| GAIF01006035.1 | 0      | 0.07   | 0      | 0      | 0      | 0      |
| GAIF01006037.1 | 0.58   | 0      | 0.32   | 1.01   | 9.25   | 0.32   |
| GAIF01006038.1 | 27.25  | 15.08  | 22.13  | 36.83  | 29.53  | 61.71  |
| GAIF01006039.1 | 4.71   | 2.49   | 3.35   | 6.25   | 7.67   | 10.23  |
| GAIF01006041.1 | 0.19   | 0.21   | 0.41   | 0.22   | 0.45   | 0.21   |
| GAIF01006043.1 | 0.06   | 0      | 0.03   | 0.1    | 0.17   | 0      |
| GAIF01006044.1 | 17.22  | 28.42  | 13.87  | 7.3    | 26.26  | 26.32  |
| GAIF01006045.1 | 1.3    | 3.61   | 2.06   | 4.02   | 5.21   | 0.08   |
| GAIF01006046.1 | 0      | 0.09   | 0.09   | 0      | 0      | 0      |
| GAIF01006047.1 | 0      | 0      | 0      | 0.13   | 0      | 0      |
| GAIF01006049.1 | 128.96 | 55.01  | 94.73  | 271.05 | 125.36 | 347.91 |

|                |        |        |        |        |        |        |
|----------------|--------|--------|--------|--------|--------|--------|
| GAIF01006050.1 | 130.84 | 104.83 | 78.75  | 70.71  | 42.31  | 25.34  |
| GAIF01006051.1 | 0      | 0      | 0      | 0.07   | 0.55   | 0.03   |
| GAIF01006052.1 | 18.34  | 27.07  | 30.49  | 41.52  | 39.2   | 11.5   |
| GAIF01006054.1 | 0.27   | 0.3    | 0.1    | 1.47   | 3.27   | 0.3    |
| GAIF01006056.1 | 12.86  | 26.5   | 12.39  | 37.21  | 28.87  | 4.11   |
| GAIF01006058.1 | 0.07   | 0      | 0.07   | 0.53   | 3.56   | 0      |
| GAIF01006059.1 | 0.29   | 0      | 0      | 0.32   | 2.81   | 1.91   |
| GAIF01006061.1 | 0      | 0.04   | 0      | 0.04   | 0.22   | 0      |
| GAIF01006063.1 | 236.06 | 233.68 | 171.89 | 137.15 | 96     | 58.38  |
| GAIF01006064.1 | 511.54 | 297.71 | 276.84 | 240.23 | 166.36 | 308.87 |
| GAIF01006065.1 | 0.14   | 0.05   | 0.17   | 0.05   | 0.11   | 0.1    |
| GAIF01006066.1 | 16.35  | 15.05  | 13.67  | 79.92  | 66.36  | 11.94  |
| GAIF01006067.1 | 14.84  | 16.34  | 16.81  | 2.97   | 1.6    | 0.6    |
| GAIF01006068.1 | 0      | 0      | 0      | 0.11   | 0      | 0      |
| GAIF01006069.1 | 0      | 0      | 0      | 0.06   | 0.19   | 0      |
| GAIF01006070.1 | 0      | 0      | 0.05   | 0.42   | 0.84   | 0.21   |
| GAIF01006071.1 | 0.47   | 0.21   | 0      | 3.07   | 7.39   | 4.59   |
| GAIF01006072.1 | 0.79   | 0      | 0      | 0.27   | 0.9    | 0.05   |
| GAIF01006074.1 | 11.49  | 12.74  | 7.03   | 11.12  | 7.98   | 1.3    |
| GAIF01006076.1 | 0.12   | 0.26   | 0.39   | 0.28   | 0      | 0.13   |
| GAIF01006078.1 | 0      | 0      | 0      | 0.05   | 0.09   | 0      |
| GAIF01006080.1 | 44.49  | 27.56  | 21.54  | 49.98  | 57.88  | 120.66 |
| GAIF01006081.1 | 0.06   | 0      | 0.12   | 0      | 0      | 0.06   |
| GAIF01006082.1 | 2.39   | 1.32   | 1.74   | 1.3    | 1.46   | 1.13   |
| GAIF01006084.1 | 0.54   | 0.51   | 0.57   | 0.44   | 0.63   | 0.34   |
| GAIF01006085.1 | 584.83 | 590.91 | 325.38 | 402.31 | 358.72 | 69.46  |
| GAIF01006087.1 | 0.09   | 0.05   | 0.1    | 0.46   | 2.15   | 0      |
| GAIF01006088.1 | 0.4    | 0.32   | 0.65   | 0      | 0      | 0      |
| GAIF01006089.1 | 0      | 0      | 0      | 0      | 0.07   | 0      |
| GAIF01006090.1 | 34.42  | 0.68   | 0.21   | 4.51   | 0.45   | 0.9    |
| GAIF01006091.1 | 0.04   | 0.16   | 0.08   | 1.26   | 4.98   | 0.36   |
| GAIF01006092.1 | 39.81  | 24.42  | 43.05  | 8.69   | 8.28   | 22.28  |
| GAIF01006093.1 | 0.21   | 0      | 0      | 0.61   | 2.66   | 0.11   |
| GAIF01006094.1 | 66.46  | 22.61  | 20.44  | 32.69  | 45.57  | 25.1   |
| GAIF01006095.1 | 0      | 0.08   | 0      | 0.01   | 0.44   | 0.07   |
| GAIF01006100.1 | 27.67  | 54.44  | 23.22  | 90.6   | 80.91  | 5.07   |
| GAIF01006101.1 | 4.87   | 19.36  | 9.02   | 4.64   | 3.93   | 0.08   |
| GAIF01006103.1 | 0.4    | 0.1    | 0.02   | 0.1    | 1.89   | 1.25   |
| GAIF01006104.1 | 1.33   | 0      | 0.06   | 0.06   | 0.06   | 0      |
| GAIF01006105.1 | 0      | 0      | 0      | 0.01   | 0      | 0      |
| GAIF01006106.1 | 0      | 0      | 0      | 0      | 0.64   | 0      |
| GAIF01006107.1 | 39.72  | 48.87  | 76.38  | 127.03 | 60.13  | 37.56  |
| GAIF01006108.1 | 2.53   | 0.8    | 1.41   | 0      | 0      | 0      |
| GAIF01006110.1 | 0      | 1.53   | 1.16   | 0.14   | 0      | 0.26   |

|                |        |        |        |        |         |         |
|----------------|--------|--------|--------|--------|---------|---------|
| GAIF01006113.1 | 0.15   | 0      | 0      | 0      | 0       | 0       |
| GAIF01006114.1 | 0      | 0.05   | 0      | 0.03   | 0.14    | 0       |
| GAIF01006115.1 | 0      | 0      | 0      | 1.82   | 0       | 0       |
| GAIF01006116.1 | 10.06  | 7.41   | 4.14   | 18.14  | 34.37   | 16.48   |
| GAIF01006118.1 | 0.07   | 0      | 0      | 0.91   | 0.08    | 0.08    |
| GAIF01006119.1 | 0      | 0      | 0.43   | 0.12   | 0.07    | 0       |
| GAIF01006120.1 | 0.13   | 0      | 0.07   | 0.07   | 1.06    | 0.07    |
| GAIF01006121.1 | 0.85   | 0.79   | 0      | 3.22   | 8.96    | 0.2     |
| GAIF01006122.1 | 0.29   | 0      | 0.63   | 0      | 0.17    | 0       |
| GAIF01006123.1 | 0      | 0      | 0      | 0      | 0       | 0.04    |
| GAIF01006124.1 | 0.33   | 0      | 0.15   | 0.85   | 1.76    | 0.66    |
| GAIF01006125.1 | 25.03  | 31.88  | 37.81  | 94.51  | 95.46   | 21.07   |
| GAIF01006126.1 | 19.77  | 22.49  | 27.95  | 34.43  | 30.07   | 12.4    |
| GAIF01006128.1 | 99.79  | 180.4  | 247.56 | 561.85 | 347.81  | 87.89   |
| GAIF01006129.1 | 0      | 0      | 0      | 0      | 0.19    | 0       |
| GAIF01006133.1 | 83.64  | 44.99  | 74.6   | 107.11 | 42.23   | 87.68   |
| GAIF01006135.1 | 0      | 0.07   | 0.04   | 2.63   | 9.01    | 1.36    |
| GAIF01006136.1 | 3.33   | 10.32  | 9.53   | 10.66  | 24.89   | 2.89    |
| GAIF01006139.1 | 12.69  | 14.93  | 9.97   | 59.79  | 108.56  | 25.15   |
| GAIF01006141.1 | 0.06   | 0      | 0.06   | 0      | 0.14    | 0.07    |
| GAIF01006142.1 | 4.44   | 0      | 191.75 | 0      | 0       | 0       |
| GAIF01006143.1 | 0      | 0      | 0.01   | 0      | 0       | 0       |
| GAIF01006145.1 | 0      | 0      | 0      | 0      | 0.55    | 0.07    |
| GAIF01006146.1 | 0.13   | 0.14   | 0.14   | 0      | 0       | 0       |
| GAIF01006147.1 | 0      | 0      | 0      | 1      | 0.16    | 0       |
| GAIF01006148.1 | 36.37  | 31.6   | 31.26  | 46.36  | 66.7    | 10.34   |
| GAIF01006149.1 | 0      | 0      | 0      | 0      | 0.13    | 0       |
| GAIF01006151.1 | 0      | 0      | 0      | 0      | 0.07    | 0       |
| GAIF01006154.1 | 0      | 0      | 0      | 0      | 0.18    | 0       |
| GAIF01006155.1 | 615.16 | 395.11 | 197.42 | 590.58 | 1121.08 | 2282.41 |
| GAIF01006156.1 | 0.06   | 0      | 0      | 0      | 0       | 0       |
| GAIF01006157.1 | 6      | 7.25   | 1      | 12.74  | 13.99   | 0.66    |
| GAIF01006158.1 | 3.15   | 4.15   | 0      | 0      | 0       | 0       |
| GAIF01006160.1 | 0.21   | 0.23   | 0      | 0.25   | 0.51    | 0       |
| GAIF01006162.1 | 0.37   | 0      | 0      | 0.52   | 3.12    | 0       |
| GAIF01006163.1 | 0      | 0.12   | 0      | 0.23   | 0.89    | 0.07    |
| GAIF01006164.1 | 0      | 0      | 0      | 0.41   | 0.57    | 0       |
| GAIF01006165.1 | 2.14   | 0.95   | 0.43   | 1.49   | 1.76    | 0.43    |
| GAIF01006166.1 | 0.3    | 0.18   | 0.24   | 0.15   | 0.1     | 0.03    |
| GAIF01006168.1 | 0      | 0      | 0      | 0      | 1.7     | 0       |
| GAIF01006169.1 | 0.15   | 0.81   | 2.1    | 0.77   | 0.48    | 0       |
| GAIF01006171.1 | 0.12   | 0      | 0      | 0      | 0.73    | 0       |
| GAIF01006172.1 | 10.89  | 9.69   | 9.38   | 3.86   | 3.04    | 3.74    |
| GAIF01006174.1 | 7.47   | 5.81   | 4.76   | 14.4   | 31.91   | 5.26    |

|                |        |       |        |        |        |       |
|----------------|--------|-------|--------|--------|--------|-------|
| GAIF01006175.1 | 0.05   | 0.05  | 0      | 0      | 0      | 0.05  |
| GAIF01006176.1 | 25.76  | 25.07 | 24.38  | 10.9   | 10.27  | 5.96  |
| GAIF01006177.1 | 1.91   | 1.31  | 2      | 3.04   | 8.4    | 2.08  |
| GAIF01006178.1 | 14.06  | 6.46  | 12.71  | 9.34   | 4.52   | 6.46  |
| GAIF01006179.1 | 0.61   | 0.21  | 0.48   | 0.3    | 0.09   | 0.28  |
| GAIF01006180.1 | 0      | 0.05  | 0      | 0.11   | 0.87   | 0     |
| GAIF01006182.1 | 27.16  | 19.38 | 9.56   | 66.14  | 78.74  | 5.3   |
| GAIF01006183.1 | 0.83   | 1.75  | 0.49   | 1.23   | 0      | 0.1   |
| GAIF01006184.1 | 0      | 0     | 0      | 0.2    | 0      | 0     |
| GAIF01006185.1 | 15.9   | 13.77 | 11.64  | 5.7    | 4.84   | 1.08  |
| GAIF01006186.1 | 8.41   | 3.6   | 1.76   | 18.59  | 9.63   | 4.72  |
| GAIF01006187.1 | 0      | 0     | 0      | 0.11   | 0.47   | 0.11  |
| GAIF01006189.1 | 14.69  | 13.34 | 30.11  | 26.42  | 12.23  | 17.37 |
| GAIF01006190.1 | 0      | 0     | 0      | 0      | 0.03   | 0     |
| GAIF01006191.1 | 0.1    | 0     | 0      | 0.37   | 1.68   | 0     |
| GAIF01006194.1 | 5.57   | 3.81  | 4.95   | 11.26  | 8.63   | 7.72  |
| GAIF01006195.1 | 0.34   | 0.37  | 0.56   | 1.58   | 6.94   | 0.14  |
| GAIF01006199.1 | 0      | 0     | 0      | 0.03   | 0.84   | 0     |
| GAIF01006200.1 | 0.81   | 1.22  | 0.81   | 0.4    | 0.5    | 0.06  |
| GAIF01006201.1 | 19.06  | 24.79 | 14.93  | 55.12  | 54.15  | 5.68  |
| GAIF01006202.1 | 35.32  | 35.09 | 31.99  | 86.43  | 42.92  | 15.33 |
| GAIF01006204.1 | 0      | 0.07  | 0      | 0.16   | 0.57   | 0     |
| GAIF01006205.1 | 132.85 | 114   | 113.72 | 236.6  | 193.71 | 78.46 |
| GAIF01006207.1 | 0      | 0.84  | 0      | 0      | 0      | 0     |
| GAIF01006210.1 | 0      | 0     | 0      | 0      | 0.34   | 0     |
| GAIF01006211.1 | 0      | 2.61  | 0      | 1.24   | 0.79   | 0     |
| GAIF01006214.1 | 1.31   | 0.63  | 3.52   | 2.78   | 1.66   | 1.07  |
| GAIF01006215.1 | 0      | 0     | 0      | 0.11   | 0.33   | 0     |
| GAIF01006216.1 | 0.01   | 0.01  | 0.01   | 0.02   | 0      | 0     |
| GAIF01006217.1 | 0      | 0.07  | 0      | 0      | 0.16   | 0     |
| GAIF01006219.1 | 0      | 0     | 0      | 0.12   | 0.24   | 0     |
| GAIF01006221.1 | 0      | 0     | 0      | 0      | 0.03   | 0     |
| GAIF01006226.1 | 22.38  | 21.2  | 13.81  | 117.26 | 130.77 | 5.76  |
| GAIF01006227.1 | 0      | 0     | 0      | 0.09   | 0.11   | 0     |
| GAIF01006228.1 | 32.61  | 16.99 | 5.88   | 8.47   | 5.78   | 2.07  |
| GAIF01006229.1 | 12.87  | 3.9   | 2.19   | 8.66   | 9.78   | 7.17  |
| GAIF01006230.1 | 0      | 0     | 0      | 0      | 0      | 0.07  |
| GAIF01006231.1 | 3.54   | 1.17  | 2.24   | 7.89   | 17.36  | 61.38 |
| GAIF01006234.1 | 0      | 0     | 0      | 0.15   | 0      | 0     |
| GAIF01006238.1 | 0.23   | 0.25  | 0      | 3.53   | 6.37   | 0.25  |
| GAIF01006239.1 | 3.46   | 0.69  | 0.2    | 13.22  | 29.04  | 0.4   |
| GAIF01006240.1 | 9.67   | 10.28 | 19.95  | 15.94  | 21.54  | 3.38  |
| GAIF01006241.1 | 2.2    | 1.3   | 1.53   | 0.67   | 2.33   | 0.44  |
| GAIF01006243.1 | 0.59   | 0.11  | 0.22   | 0.11   | 0.36   | 0     |

|                |       |        |       |       |        |       |
|----------------|-------|--------|-------|-------|--------|-------|
| GAIF01006244.1 | 0     | 0.15   | 0     | 0.79  | 1.35   | 0.56  |
| GAIF01006245.1 | 0.14  | 0.15   | 0     | 0.16  | 0.65   | 0     |
| GAIF01006246.1 | 2.45  | 3.68   | 0.32  | 7.61  | 20.29  | 0.87  |
| GAIF01006247.1 | 0     | 0.31   | 0     | 0.67  | 2.78   | 0     |
| GAIF01006248.1 | 0     | 0      | 0.15  | 0.32  | 0.5    | 0     |
| GAIF01006249.1 | 13.28 | 101.47 | 7.25  | 3.39  | 33.1   | 2.1   |
| GAIF01006250.1 | 0.89  | 0.79   | 1.35  | 4.91  | 11.12  | 0.43  |
| GAIF01006253.1 | 0     | 0      | 0     | 0.24  | 0.34   | 0     |
| GAIF01006254.1 | 0     | 0      | 4.27  | 4.51  | 7.01   | 10.7  |
| GAIF01006255.1 | 0.45  | 0      | 0     | 0     | 0.27   | 0     |
| GAIF01006256.1 | 3.14  | 1.83   | 3.33  | 3.65  | 0.81   | 5.56  |
| GAIF01006257.1 | 0     | 0.03   | 0     | 0.04  | 0      | 0     |
| GAIF01006260.1 | 30.93 | 16.94  | 2.04  | 90.97 | 231.88 | 4.61  |
| GAIF01006261.1 | 3.98  | 2.42   | 0.87  | 7.76  | 17.04  | 2.11  |
| GAIF01006262.1 | 0     | 0      | 0     | 0     | 0.18   | 0     |
| GAIF01006263.1 | 0.15  | 0.16   | 0.15  | 0.23  | 1.38   | 0.15  |
| GAIF01006265.1 | 0     | 0      | 0     | 0     | 0      | 0.15  |
| GAIF01006266.1 | 0     | 0      | 0     | 0.07  | 0.3    | 0     |
| GAIF01006269.1 | 17.88 | 6.67   | 7.26  | 30.39 | 36.02  | 33.82 |
| GAIF01006271.1 | 1     | 1.44   | 1.22  | 0.28  | 1.55   | 0.21  |
| GAIF01006272.1 | 13.03 | 8.7    | 16.45 | 25.49 | 11.98  | 15.59 |
| GAIF01006274.1 | 1.07  | 0.95   | 0.22  | 9.35  | 18.28  | 0.66  |
| GAIF01006275.1 | 0.07  | 0      | 0.16  | 0     | 0      | 0     |
| GAIF01006276.1 | 0     | 0      | 0     | 0     | 0.21   | 0     |
| GAIF01006277.1 | 0     | 0.17   | 0.11  | 0.42  | 0.37   | 0.06  |
| GAIF01006278.1 | 40    | 44.8   | 43.54 | 66.35 | 38.61  | 31.22 |
| GAIF01006279.1 | 6     | 14.32  | 9.32  | 9.17  | 14.95  | 11.93 |
| GAIF01006280.1 | 0     | 0      | 0     | 0     | 0      | 0.12  |
| GAIF01006281.1 | 0     | 0.8    | 0.06  | 0     | 0      | 0     |
| GAIF01006282.1 | 3.71  | 7.53   | 1.65  | 9.28  | 8.67   | 0.39  |
| GAIF01006283.1 | 0.44  | 0      | 0.24  | 24.65 | 8.87   | 1.7   |
| GAIF01006284.1 | 0     | 0      | 0     | 0     | 0.07   | 0     |
| GAIF01006285.1 | 0.81  | 0.08   | 0.08  | 0.68  | 1.15   | 0.81  |
| GAIF01006286.1 | 0     | 0      | 0     | 0.02  | 0.05   | 0     |
| GAIF01006287.1 | 0.07  | 0.04   | 0     | 0     | 0      | 0     |
| GAIF01006288.1 | 0     | 0.3    | 0     | 0     | 0      | 0     |
| GAIF01006289.1 | 0.07  | 0      | 0.15  | 0.7   | 4.11   | 0.07  |
| GAIF01006290.1 | 0.31  | 0      | 0     | 0.37  | 0      | 0.02  |
| GAIF01006293.1 | 0     | 0      | 0     | 0     | 0.74   | 2.13  |
| GAIF01006294.1 | 2.12  | 1.65   | 0.88  | 1.95  | 4.52   | 1.15  |
| GAIF01006295.1 | 8.04  | 4.98   | 9.4   | 6.13  | 3.92   | 5.39  |
| GAIF01006296.1 | 0     | 0.2    | 0     | 0.21  | 0.56   | 0     |
| GAIF01006297.1 | 0.25  | 0.41   | 0     | 0.59  | 3.06   | 0.56  |
| GAIF01006298.1 | 60.08 | 32.08  | 2.56  | 10.24 | 10.07  | 0.35  |

|                |        |        |        |       |        |       |
|----------------|--------|--------|--------|-------|--------|-------|
| GAIF01006299.1 | 6.65   | 7.81   | 5.19   | 5.28  | 3.37   | 4.25  |
| GAIF01006301.1 | 0      | 0      | 0      | 0.05  | 0      | 0     |
| GAIF01006302.1 | 0      | 0      | 0      | 0.75  | 0      | 0.11  |
| GAIF01006303.1 | 0.6    | 0.52   | 0.13   | 2.79  | 17.2   | 4.11  |
| GAIF01006304.1 | 0      | 0      | 0      | 0.07  | 0.04   | 0     |
| GAIF01006307.1 | 0      | 0      | 0      | 0.48  | 0.95   | 0     |
| GAIF01006309.1 | 30.51  | 38.3   | 50.5   | 46.21 | 31.16  | 23.95 |
| GAIF01006310.1 | 0      | 0.12   | 0.24   | 0     | 0.13   | 0     |
| GAIF01006311.1 | 0.54   | 0.67   | 1.36   | 0.58  | 0.02   | 1.95  |
| GAIF01006313.1 | 1.39   | 3.74   | 3.53   | 0.51  | 0.62   | 0.24  |
| GAIF01006314.1 | 3.12   | 2.91   | 2.5    | 3.05  | 16.29  | 4.01  |
| GAIF01006315.1 | 312.88 | 366.48 | 922.39 | 68.05 | 74.35  | 305.8 |
| GAIF01006316.1 | 0.05   | 0.54   | 0.22   | 0.22  | 0.48   | 0.15  |
| GAIF01006317.1 | 65.05  | 0.92   | 1.61   | 0.98  | 0.07   | 0     |
| GAIF01006318.1 | 39.02  | 21.78  | 8.28   | 71.15 | 107.04 | 4.17  |
| GAIF01006320.1 | 28.79  | 15     | 23.7   | 18.67 | 9.16   | 7.74  |
| GAIF01006321.1 | 0      | 0      | 0      | 0.6   | 3.86   | 0.13  |
| GAIF01006325.1 | 11.17  | 16.52  | 10.43  | 34.4  | 39.57  | 11.26 |
| GAIF01006326.1 | 0      | 0      | 0      | 0     | 0.24   | 0     |
| GAIF01006328.1 | 1.9    | 6.47   | 0      | 0     | 0      | 0     |
| GAIF01006330.1 | 6.93   | 7.43   | 2.83   | 12.42 | 28.11  | 4.91  |
| GAIF01006332.1 | 0      | 0      | 0      | 0     | 0      | 0.36  |
| GAIF01006333.1 | 0      | 0      | 0      | 0     | 0.37   | 0     |
| GAIF01006334.1 | 0.28   | 0.06   | 0      | 1.81  | 8.32   | 2.03  |
| GAIF01006335.1 | 0      | 0      | 0      | 0     | 0.15   | 0     |
| GAIF01006337.1 | 5.51   | 7.75   | 8.96   | 25.35 | 21.26  | 5.85  |
| GAIF01006338.1 | 0      | 0.19   | 0.28   | 0.17  | 0.24   | 0.06  |
| GAIF01006340.1 | 19.16  | 18.52  | 18.32  | 26.47 | 18.31  | 11.61 |
| GAIF01006341.1 | 0.25   | 0      | 0      | 2.04  | 2.32   | 1.02  |
| GAIF01006342.1 | 22.35  | 9.34   | 8.46   | 37.71 | 39.08  | 10.75 |
| GAIF01006343.1 | 0      | 0      | 0      | 0.85  | 2.4    | 0     |
| GAIF01006345.1 | 0      | 0      | 0.06   | 0     | 0.07   | 0     |
| GAIF01006346.1 | 0      | 0      | 0      | 0     | 0.09   | 0     |
| GAIF01006347.1 | 5.36   | 6.2    | 3.98   | 24.94 | 17.32  | 3.36  |
| GAIF01006351.1 | 0      | 0.04   | 0      | 0.13  | 0.36   | 0     |
| GAIF01006352.1 | 0.17   | 0      | 0      | 0.17  | 0.35   | 0.37  |
| GAIF01006353.1 | 1.31   | 2.42   | 3.1    | 0.45  | 0.21   | 0.12  |
| GAIF01006354.1 | 1.86   | 6.46   | 3.2    | 7.97  | 4.2    | 1.03  |
| GAIF01006355.1 | 0.6    | 0.52   | 1.12   | 5.67  | 1.66   | 0.89  |
| GAIF01006358.1 | 17.05  | 9.45   | 23.21  | 32.56 | 13.86  | 56.39 |
| GAIF01006359.1 | 0.58   | 2.34   | 2.95   | 0.91  | 0.96   | 0.33  |
| GAIF01006360.1 | 9.26   | 7.16   | 4.5    | 1.24  | 0.21   | 0.2   |
| GAIF01006361.1 | 13.59  | 22.15  | 4.88   | 2.97  | 13.94  | 0     |
| GAIF01006362.1 | 1.02   | 0.44   | 0.89   | 0.71  | 0.73   | 0.45  |

|                |        |        |        |         |        |        |
|----------------|--------|--------|--------|---------|--------|--------|
| GAIF01006363.1 | 284.36 | 56.37  | 152.54 | 209.81  | 58.36  | 502.27 |
| GAIF01006364.1 | 1.11   | 0.31   | 0      | 0.34    | 0      | 0      |
| GAIF01006365.1 | 16.05  | 15.92  | 10.12  | 43.06   | 30.53  | 5.5    |
| GAIF01006366.1 | 0      | 0.15   | 0      | 0.47    | 2.45   | 0.15   |
| GAIF01006367.1 | 10.83  | 1.57   | 1.75   | 19.84   | 3.67   | 0.89   |
| GAIF01006368.1 | 5.5    | 2.66   | 0.61   | 0.64    | 0      | 0.71   |
| GAIF01006369.1 | 2.23   | 1.89   | 0.33   | 1.94    | 1.53   | 0.14   |
| GAIF01006370.1 | 0.92   | 0      | 0      | 0.65    | 1.45   | 0.53   |
| GAIF01006372.1 | 2.49   | 3.81   | 0.25   | 7.31    | 16.48  | 0.74   |
| GAIF01006374.1 | 8.25   | 5.76   | 9.31   | 6.76    | 12.33  | 45.53  |
| GAIF01006378.1 | 2.06   | 1.74   | 0.92   | 3.56    | 13.3   | 1.48   |
| GAIF01006379.1 | 0      | 0      | 0.16   | 0       | 0      | 0.16   |
| GAIF01006380.1 | 5.69   | 6.03   | 4.32   | 31.91   | 35.29  | 3.97   |
| GAIF01006382.1 | 174.73 | 209.39 | 202.01 | 1469.77 | 750.71 | 367.71 |
| GAIF01006383.1 | 33.99  | 49.18  | 41.14  | 49.51   | 44     | 15.67  |
| GAIF01006384.1 | 0      | 0      | 0.69   | 0       | 0.19   | 0      |
| GAIF01006385.1 | 1.32   | 0.92   | 0.52   | 0.52    | 0.17   | 0      |
| GAIF01006387.1 | 26.57  | 19.4   | 10.02  | 6.56    | 10.49  | 7.48   |
| GAIF01006388.1 | 0      | 0      | 0      | 0       | 0.09   | 0      |
| GAIF01006389.1 | 0      | 0      | 0      | 0       | 0.44   | 0.36   |
| GAIF01006390.1 | 1.4    | 0.29   | 0.15   | 8.64    | 43.7   | 1.83   |
| GAIF01006395.1 | 0.04   | 0      | 0      | 0.36    | 1.02   | 0.4    |
| GAIF01006396.1 | 0.35   | 0.28   | 0      | 0.92    | 2.3    | 0.18   |
| GAIF01006399.1 | 0.01   | 0      | 0.01   | 0       | 0      | 0      |
| GAIF01006400.1 | 0.55   | 0.05   | 0.27   | 0.06    | 0.44   | 0.22   |
| GAIF01006401.1 | 10.65  | 22.9   | 14.08  | 8.76    | 31.31  | 3.44   |
| GAIF01006402.1 | 22.31  | 25.67  | 38.16  | 21.5    | 19.82  | 40.56  |
| GAIF01006403.1 | 14.83  | 19.9   | 11.35  | 75.52   | 135.75 | 15.95  |
| GAIF01006404.1 | 1.6    | 0.14   | 0.28   | 1.56    | 5.05   | 0.15   |
| GAIF01006405.1 | 0.05   | 0.05   | 0.05   | 1.05    | 3.26   | 0.21   |
| GAIF01006407.1 | 0      | 0      | 0      | 0       | 2.87   | 0      |
| GAIF01006408.1 | 1.43   | 0.98   | 0.5    | 0.5     | 1.11   | 0.53   |
| GAIF01006410.1 | 192.24 | 209.86 | 417.48 | 178.38  | 128.32 | 185.46 |
| GAIF01006411.1 | 37.34  | 46.87  | 23.92  | 54.81   | 27.98  | 22.27  |
| GAIF01006413.1 | 0      | 0.07   | 0      | 0.23    | 0.31   | 0.06   |
| GAIF01006414.1 | 9.39   | 6.89   | 8.79   | 18.83   | 16.78  | 17.23  |
| GAIF01006415.1 | 272.41 | 125.05 | 85.51  | 373.68  | 573.71 | 88.77  |
| GAIF01006416.1 | 5.5    | 2.64   | 4.44   | 5.25    | 4.86   | 6.06   |
| GAIF01006417.1 | 0.91   | 1.49   | 0.15   | 3.18    | 5.55   | 0.25   |
| GAIF01006418.1 | 0.05   | 0.05   | 0      | 0.96    | 0.61   | 0.1    |
| GAIF01006419.1 | 13.11  | 28.51  | 14.4   | 45.65   | 15.77  | 0      |
| GAIF01006420.1 | 12.1   | 13.16  | 20.88  | 31.44   | 21.49  | 11.43  |
| GAIF01006422.1 | 11.73  | 1.89   | 6.24   | 1.23    | 0.57   | 1.17   |
| GAIF01006423.1 | 0.2    | 0      | 0.11   | 0       | 0.12   | 0      |



|                |         |         |         |        |        |        |
|----------------|---------|---------|---------|--------|--------|--------|
| GAIF01006424.1 | 4.45    | 6.81    | 2.62    | 2.58   | 1.98   | 0      |
| GAIF01006425.1 | 21.2    | 12.47   | 12.75   | 5.56   | 7.6    | 1.44   |
| GAIF01006426.1 | 0       | 0       | 0.3     | 3.19   | 14.16  | 0      |
| GAIF01006427.1 | 1.21    | 0.51    | 0.05    | 3.78   | 17.21  | 0.1    |
| GAIF01006428.1 | 0.39    | 0       | 0       | 0      | 0.63   | 0      |
| GAIF01006429.1 | 0.5     | 0.95    | 0       | 4.8    | 8.59   | 0      |
| GAIF01006431.1 | 16.39   | 22.67   | 24.82   | 18.14  | 12.66  | 10.46  |
| GAIF01006432.1 | 0.18    | 0.1     | 0.23    | 0.44   | 0      | 0      |
| GAIF01006433.1 | 0.03    | 0       | 0       | 0      | 0      | 0      |
| GAIF01006434.1 | 0       | 0       | 0       | 0.06   | 0.06   | 0      |
| GAIF01006435.1 | 2.1     | 1.51    | 0       | 2.37   | 2.43   | 0.99   |
| GAIF01006436.1 | 0.16    | 0.36    | 0.35    | 0.56   | 3.4    | 0      |
| GAIF01006438.1 | 0.85    | 0.66    | 0.27    | 3.37   | 10.91  | 0      |
| GAIF01006440.1 | 62.61   | 48.32   | 44.47   | 62.09  | 32.82  | 15.39  |
| GAIF01006441.1 | 1.83    | 5.45    | 4.63    | 4.6    | 5      | 2.18   |
| GAIF01006442.1 | 0       | 0.39    | 0       | 2.27   | 5.97   | 0      |
| GAIF01006443.1 | 0.13    | 0       | 0.14    | 0.15   | 1.36   | 0.14   |
| GAIF01006444.1 | 0.28    | 0       | 0.19    | 0.4    | 0.18   | 0.32   |
| GAIF01006446.1 | 0.2     | 0       | 0       | 2.63   | 13.38  | 3.47   |
| GAIF01006447.1 | 6.2     | 1.1     | 0.28    | 1.76   | 1.98   | 0      |
| GAIF01006449.1 | 0.57    | 0.12    | 6.68    | 0.59   | 4.23   | 7.57   |
| GAIF01006450.1 | 0.13    | 0.05    | 0       | 0.15   | 0.72   | 0      |
| GAIF01006451.1 | 0       | 0       | 0       | 0.01   | 0.06   | 0      |
| GAIF01006452.1 | 0       | 0       | 0       | 0      | 0.08   | 0      |
| GAIF01006453.1 | 23.57   | 15.22   | 35.88   | 72.01  | 41.06  | 45.28  |
| GAIF01006454.1 | 0.73    | 1.35    | 0.72    | 1.37   | 1.23   | 0.56   |
| GAIF01006455.1 | 13.64   | 10.62   | 16.65   | 23.63  | 19.98  | 9.27   |
| GAIF01006456.1 | 1.13    | 1.3     | 1.88    | 2.93   | 12.93  | 2.47   |
| GAIF01006458.1 | 0.1     | 0       | 0.15    | 0      | 0.06   | 0      |
| GAIF01006459.1 | 2.29    | 0.29    | 0       | 0.94   | 3.08   | 0.15   |
| GAIF01006461.1 | 0       | 0       | 0       | 0      | 0.16   | 0      |
| GAIF01006462.1 | 4.14    | 2.6     | 3.04    | 13.84  | 11.19  | 6.82   |
| GAIF01006465.1 | 0.13    | 0.05    | 0.1     | 1.56   | 4.17   | 0      |
| GAIF01006467.1 | 0.23    | 0.06    | 0.28    | 0.49   | 0.82   | 0.06   |
| GAIF01006468.1 | 1340.02 | 1031.69 | 2236.78 | 353.04 | 232.13 | 685.35 |
| GAIF01006469.1 | 0       | 0       | 0       | 0.08   | 0      | 0      |
| GAIF01006470.1 | 0       | 0       | 0       | 0      | 0.9    | 0      |
| GAIF01006471.1 | 0.87    | 0       | 0.03    | 0.79   | 0      | 0      |
| GAIF01006473.1 | 16.78   | 26.92   | 25.99   | 38.9   | 25.35  | 10.1   |
| GAIF01006476.1 | 78.16   | 69.47   | 37.43   | 111.48 | 112.86 | 52.95  |
| GAIF01006478.1 | 3.84    | 4.58    | 0.75    | 16.75  | 28.76  | 1.23   |
| GAIF01006479.1 | 0.24    | 0.04    | 0       | 0.32   | 0.57   | 0      |
| GAIF01006481.1 | 0       | 0       | 0       | 0      | 0.39   | 0      |
| GAIF01006485.1 | 17.63   | 18.07   | 17.82   | 32.35  | 33.33  | 11.04  |

|                |        |        |        |        |        |        |
|----------------|--------|--------|--------|--------|--------|--------|
| GAIF01006486.1 | 5.95   | 10.1   | 8.87   | 29.64  | 29.78  | 3.36   |
| GAIF01006487.1 | 35.28  | 33.04  | 35.68  | 29.87  | 22.41  | 69.73  |
| GAIF01006490.1 | 0.12   | 0      | 0      | 0      | 0.28   | 0      |
| GAIF01006492.1 | 0      | 0      | 0      | 0      | 0.25   | 0      |
| GAIF01006493.1 | 0      | 0      | 0.31   | 1.3    | 4.04   | 0      |
| GAIF01006494.1 | 0.03   | 0      | 0      | 0.35   | 1.79   | 0.06   |
| GAIF01006495.1 | 0.27   | 0      | 0      | 0      | 0      | 0.3    |
| GAIF01006496.1 | 0.65   | 0.18   | 0      | 4.84   | 9.64   | 0.18   |
| GAIF01006498.1 | 0      | 0      | 0      | 0      | 1.43   | 0      |
| GAIF01006499.1 | 1.6    | 0.32   | 0.8    | 0.68   | 1.4    | 0      |
| GAIF01006500.1 | 1.18   | 0.39   | 0.1    | 3.36   | 8.71   | 0.5    |
| GAIF01006501.1 | 0.06   | 0      | 0      | 0      | 0.07   | 0      |
| GAIF01006502.1 | 14.5   | 15.15  | 12.39  | 68.9   | 38.05  | 16.31  |
| GAIF01006504.1 | 0      | 0      | 0      | 0.04   | 0.05   | 0      |
| GAIF01006505.1 | 4.69   | 5.86   | 1.72   | 6.97   | 24.15  | 0.27   |
| GAIF01006506.1 | 0.79   | 0.29   | 0.23   | 1.47   | 21.28  | 0.29   |
| GAIF01006508.1 | 57.2   | 71.74  | 68.26  | 37.69  | 36.59  | 55.3   |
| GAIF01006510.1 | 0      | 1.26   | 3.33   | 0      | 0      | 0      |
| GAIF01006511.1 | 77.99  | 70.11  | 27.57  | 236.7  | 406.97 | 313.72 |
| GAIF01006514.1 | 0.17   | 0      | 0.27   | 0.45   | 0.38   | 0.3    |
| GAIF01006515.1 | 1.96   | 1.72   | 0.54   | 0      | 0      | 0      |
| GAIF01006516.1 | 2.49   | 1.64   | 0.5    | 1.18   | 2.57   | 0      |
| GAIF01006517.1 | 0      | 0      | 0      | 0      | 1.04   | 0      |
| GAIF01006518.1 | 0.13   | 0.05   | 0.15   | 0.56   | 0.16   | 0      |
| GAIF01006519.1 | 0.04   | 0      | 0      | 0      | 0.13   | 0      |
| GAIF01006524.1 | 0.44   | 0.48   | 0      | 1.34   | 4.9    | 0.2    |
| GAIF01006526.1 | 0      | 0      | 0      | 0      | 0.1    | 0      |
| GAIF01006528.1 | 34.56  | 43.55  | 36.77  | 81.99  | 33.67  | 7.23   |
| GAIF01006529.1 | 973.17 | 627.85 | 476.64 | 672.42 | 282.02 | 264.12 |
| GAIF01006530.1 | 0      | 0      | 0      | 0      | 0.12   | 0      |
| GAIF01006532.1 | 31.11  | 84.63  | 70.53  | 10.84  | 0.68   | 7      |
| GAIF01006533.1 | 3.13   | 1.89   | 5.5    | 0.67   | 1.36   | 1.22   |
| GAIF01006534.1 | 2.63   | 2.76   | 2.05   | 8.3    | 7.39   | 1.54   |
| GAIF01006535.1 | 0      | 0      | 0      | 0      | 0.22   | 0      |
| GAIF01006536.1 | 6.87   | 3.59   | 3.94   | 4.85   | 0.87   | 1.91   |
| GAIF01006537.1 | 0      | 0.07   | 0      | 0      | 0.08   | 0      |
| GAIF01006538.1 | 52.49  | 38.39  | 16.49  | 33.39  | 12.87  | 18.03  |
| GAIF01006539.1 | 0.4    | 0.15   | 0      | 0.31   | 1.45   | 0.15   |
| GAIF01006540.1 | 13.52  | 9.23   | 17.46  | 35.26  | 13.09  | 25.7   |
| GAIF01006541.1 | 0.12   | 0      | 0      | 0      | 0      | 0      |
| GAIF01006542.1 | 65.09  | 58.32  | 40.42  | 144.53 | 72.66  | 35.62  |
| GAIF01006543.1 | 0.21   | 0.09   | 0      | 0      | 0      | 0      |
| GAIF01006544.1 | 0.27   | 0.59   | 0      | 1.25   | 0.4    | 0      |
| GAIF01006545.1 | 57.15  | 34.84  | 22.08  | 70.95  | 79.83  | 19.92  |

|                |       |       |       |       |        |       |
|----------------|-------|-------|-------|-------|--------|-------|
| GAIF01006548.1 | 0     | 2.51  | 0     | 15.65 | 10.08  | 0     |
| GAIF01006549.1 | 0.16  | 0.18  | 0.36  | 0.05  | 0      | 0.27  |
| GAIF01006553.1 | 3.05  | 0.68  | 0.37  | 9.19  | 8.51   | 0.45  |
| GAIF01006554.1 | 4.43  | 10.11 | 5.29  | 8.19  | 8.86   | 0.74  |
| GAIF01006556.1 | 0     | 0     | 0     | 0     | 0.67   | 0     |
| GAIF01006557.1 | 2.2   | 0.23  | 0.16  | 8.07  | 10.24  | 0.39  |
| GAIF01006560.1 | 1.94  | 0     | 0     | 0     | 2.34   | 0     |
| GAIF01006561.1 | 0.6   | 0.18  | 0.33  | 0.7   | 1.66   | 0.34  |
| GAIF01006563.1 | 13.48 | 21.89 | 12.88 | 26.66 | 8.16   | 2.8   |
| GAIF01006564.1 | 0     | 0     | 0     | 0.15  | 0      | 0     |
| GAIF01006566.1 | 3.03  | 6.77  | 3.05  | 13.2  | 11.71  | 0.59  |
| GAIF01006568.1 | 4.25  | 2.32  | 2.77  | 5.92  | 11.25  | 5.44  |
| GAIF01006569.1 | 6.47  | 7.93  | 8.04  | 7.96  | 5.32   | 3.14  |
| GAIF01006570.1 | 0     | 0.24  | 0     | 2.23  | 7.26   | 0     |
| GAIF01006571.1 | 18.22 | 10.32 | 5.88  | 11.55 | 7.18   | 4.22  |
| GAIF01006572.1 | 0.06  | 0     | 0     | 0.07  | 0.22   | 0     |
| GAIF01006573.1 | 0     | 0.14  | 0     | 0.07  | 0.23   | 0.07  |
| GAIF01006574.1 | 0.05  | 0     | 0.15  | 0.05  | 1.17   | 0.05  |
| GAIF01006576.1 | 6.77  | 0.87  | 0.39  | 8.69  | 33.44  | 34.38 |
| GAIF01006582.1 | 19.43 | 16.89 | 32.83 | 25.57 | 12.1   | 30.16 |
| GAIF01006583.1 | 0     | 0     | 0     | 0     | 0.39   | 0     |
| GAIF01006584.1 | 0.66  | 0.76  | 0.31  | 4.58  | 10.96  | 0.23  |
| GAIF01006585.1 | 0.03  | 0.03  | 0     | 0     | 0.16   | 0     |
| GAIF01006586.1 | 7.81  | 0.81  | 0.62  | 18.21 | 127.98 | 1.58  |
| GAIF01006587.1 | 1.15  | 0.56  | 0     | 0     | 0.6    | 0.43  |
| GAIF01006588.1 | 0     | 0.36  | 4.1   | 0     | 0      | 0     |
| GAIF01006590.1 | 19.08 | 30.53 | 23.51 | 88.77 | 55.91  | 8.63  |
| GAIF01006591.1 | 0.56  | 0.2   | 0.27  | 3.1   | 9.49   | 0.07  |
| GAIF01006592.1 | 0     | 0     | 0     | 0     | 0      | 0.09  |
| GAIF01006593.1 | 5.51  | 11.28 | 3.03  | 19.76 | 19.3   | 1.25  |
| GAIF01006594.1 | 0.67  | 0     | 1.82  | 7.12  | 7.55   | 0.04  |
| GAIF01006595.1 | 0     | 0.13  | 0     | 0     | 0      | 0     |
| GAIF01006596.1 | 0     | 0     | 0     | 0     | 0.34   | 0     |
| GAIF01006597.1 | 20.56 | 23.35 | 39.9  | 41.76 | 16.89  | 12.79 |
| GAIF01006598.1 | 8.27  | 4.55  | 3.75  | 13.01 | 21.34  | 3.01  |
| GAIF01006600.1 | 0     | 0.06  | 0     | 0.8   | 0.51   | 0     |
| GAIF01006602.1 | 41.73 | 72.91 | 39.62 | 13.45 | 6.91   | 0.79  |
| GAIF01006604.1 | 0     | 0.98  | 1.37  | 0     | 0      | 0.31  |
| GAIF01006607.1 | 14.7  | 12.18 | 20.55 | 17.77 | 10.73  | 24.88 |
| GAIF01006608.1 | 0     | 0     | 0     | 0.09  | 0.32   | 0     |
| GAIF01006609.1 | 0.59  | 0.35  | 0.35  | 4.29  | 28.99  | 0.42  |
| GAIF01006611.1 | 8.29  | 21.54 | 10.26 | 40.17 | 32.86  | 1.47  |
| GAIF01006612.1 | 0.05  | 0     | 0     | 0.22  | 1.14   | 0     |
| GAIF01006613.1 | 5.67  | 6.32  | 2.42  | 15.54 | 10.01  | 2.38  |

|                |        |        |        |        |        |        |
|----------------|--------|--------|--------|--------|--------|--------|
| GAIF01006614.1 | 0.27   | 0.58   | 0      | 1.09   | 4.18   | 0      |
| GAIF01006616.1 | 0      | 0      | 3.13   | 0      | 0      | 0      |
| GAIF01006617.1 | 0      | 0      | 0      | 0      | 0      | 0.26   |
| GAIF01006619.1 | 10.67  | 5.61   | 2.99   | 0.5    | 0.43   | 0.16   |
| GAIF01006620.1 | 33.36  | 28.01  | 22.5   | 48.39  | 23.12  | 14.41  |
| GAIF01006621.1 | 0.38   | 0.1    | 0.1    | 1.53   | 8.06   | 2.81   |
| GAIF01006622.1 | 17.54  | 18.78  | 18.44  | 51.55  | 27.48  | 12.07  |
| GAIF01006624.1 | 71.96  | 54.33  | 104.31 | 10.18  | 2.85   | 7.45   |
| GAIF01006625.1 | 16.97  | 9.54   | 22.49  | 28.36  | 13.55  | 15.64  |
| GAIF01006626.1 | 0      | 0      | 0.15   | 0      | 0      | 0      |
| GAIF01006628.1 | 0      | 0      | 0      | 0.17   | 0.71   | 0      |
| GAIF01006630.1 | 19.78  | 15.48  | 11.27  | 64.36  | 41.2   | 14.55  |
| GAIF01006632.1 | 0      | 0      | 0      | 0.27   | 1.41   | 0      |
| GAIF01006633.1 | 0.14   | 0.75   | 0.9    | 0.48   | 0.66   | 0.15   |
| GAIF01006634.1 | 0.06   | 0.03   | 0      | 0.56   | 1      | 0      |
| GAIF01006635.1 | 0      | 0      | 0.14   | 0      | 0      | 0      |
| GAIF01006636.1 | 0      | 0      | 0      | 0.59   | 0.61   | 1.39   |
| GAIF01006637.1 | 0.08   | 0      | 0.18   | 0.48   | 0.95   | 0      |
| GAIF01006638.1 | 0.87   | 0.71   | 0.33   | 5.09   | 0      | 0.2    |
| GAIF01006641.1 | 0.41   | 0.2    | 0.1    | 0.22   | 0.53   | 0.1    |
| GAIF01006642.1 | 0.09   | 0.1    | 0.1    | 0.11   | 0.45   | 0.21   |
| GAIF01006643.1 | 14.83  | 16.03  | 9.16   | 19.63  | 21.32  | 2.11   |
| GAIF01006644.1 | 1.01   | 1.1    | 0.65   | 2.63   | 8.99   | 0.56   |
| GAIF01006646.1 | 0      | 0      | 0      | 0.03   | 0.12   | 0      |
| GAIF01006647.1 | 10.37  | 10.17  | 9.79   | 32.1   | 21.22  | 7.63   |
| GAIF01006649.1 | 0.37   | 0.3    | 0      | 1.39   | 1.44   | 0.1    |
| GAIF01006650.1 | 0.06   | 0      | 0.08   | 0.26   | 0.49   | 0      |
| GAIF01006651.1 | 23.96  | 9.73   | 8.73   | 4.96   | 1.79   | 0.88   |
| GAIF01006652.1 | 2.91   | 2.78   | 1.76   | 1.57   | 1.63   | 0.94   |
| GAIF01006653.1 | 0.51   | 0.41   | 0      | 2.67   | 0.42   | 0.99   |
| GAIF01006655.1 | 0      | 0      | 0      | 0      | 0.08   | 0      |
| GAIF01006658.1 | 0      | 0.09   | 0.05   | 0.29   | 0.9    | 0.09   |
| GAIF01006661.1 | 0      | 0      | 0      | 0      | 0.09   | 0      |
| GAIF01006663.1 | 0.08   | 0      | 0      | 0.1    | 0.6    | 0.55   |
| GAIF01006664.1 | 635.11 | 411.73 | 423.05 | 666.51 | 385.53 | 342.33 |
| GAIF01006665.1 | 63.8   | 13.74  | 23.4   | 37.62  | 20.95  | 41.03  |
| GAIF01006667.1 | 23.25  | 13.52  | 11.06  | 31.59  | 41.79  | 6.58   |
| GAIF01006669.1 | 0      | 0      | 0.06   | 0      | 0      | 0      |
| GAIF01006670.1 | 0      | 0      | 0      | 0.04   | 0.95   | 0.22   |
| GAIF01006672.1 | 0      | 0      | 0      | 0      | 0.2    | 0      |
| GAIF01006674.1 | 0      | 0      | 0      | 0.64   | 1.57   | 0      |
| GAIF01006676.1 | 0      | 0.06   | 0      | 0      | 0.54   | 0      |
| GAIF01006677.1 | 2.79   | 1.01   | 0.82   | 8.41   | 29.61  | 1.13   |
| GAIF01006678.1 | 0.33   | 0.12   | 0      | 0.64   | 2.13   | 0.24   |

|                |         |         |         |        |        |        |
|----------------|---------|---------|---------|--------|--------|--------|
| GAIF01006679.1 | 12.23   | 13.45   | 8.72    | 17.86  | 10.6   | 4.36   |
| GAIF01006680.1 | 33.04   | 32.18   | 24.42   | 67.14  | 48.16  | 21.23  |
| GAIF01006681.1 | 6.87    | 0.54    | 0.59    | 5.37   | 51.03  | 6.9    |
| GAIF01006682.1 | 38.94   | 31.93   | 16.93   | 49.14  | 46.53  | 16.22  |
| GAIF01006683.1 | 0       | 0       | 0       | 0      | 0.14   | 0      |
| GAIF01006684.1 | 1.56    | 0.25    | 0.04    | 2.69   | 15.03  | 26.15  |
| GAIF01006685.1 | 5049.11 | 3327.68 | 5666.93 | 464.84 | 100.53 | 377.91 |
| GAIF01006686.1 | 10.28   | 14.01   | 10.83   | 14.99  | 17.54  | 20.03  |
| GAIF01006688.1 | 0       | 0.06    | 0       | 0.26   | 0      | 0.03   |
| GAIF01006691.1 | 0.54    | 0.76    | 1.01    | 1.88   | 3.5    | 0.42   |
| GAIF01006692.1 | 0       | 0       | 0       | 0      | 0.83   | 0      |
| GAIF01006693.1 | 0.62    | 0.62    | 0.47    | 0      | 0.39   | 0      |
| GAIF01006694.1 | 5.82    | 2.34    | 0.51    | 13.6   | 27.62  | 2.89   |
| GAIF01006695.1 | 1.1     | 0       | 0       | 3.47   | 8.7    | 1.91   |
| GAIF01006696.1 | 34.72   | 11.72   | 15.86   | 22.02  | 14.91  | 65.7   |
| GAIF01006697.1 | 3.62    | 4.34    | 5.35    | 6.16   | 4.41   | 3.19   |
| GAIF01006700.1 | 0.7     | 0.56    | 1.59    | 2.03   | 1.28   | 0.31   |
| GAIF01006702.1 | 0.74    | 0.27    | 0.09    | 4.28   | 14.16  | 0.14   |
| GAIF01006703.1 | 0.12    | 0       | 0       | 0      | 0      | 0      |
| GAIF01006704.1 | 35.23   | 24.97   | 26.75   | 26.03  | 35.07  | 7.7    |
| GAIF01006705.1 | 0.33    | 0       | 0       | 0      | 0.87   | 0      |
| GAIF01006707.1 | 0.07    | 0.08    | 0       | 0.04   | 0.44   | 0.04   |
| GAIF01006708.1 | 0       | 0.16    | 0       | 0      | 0      | 0      |
| GAIF01006709.1 | 19.58   | 20.02   | 15.52   | 47.85  | 48.18  | 12     |
| GAIF01006710.1 | 0       | 0       | 0       | 0.12   | 0      | 0      |
| GAIF01006712.1 | 0.29    | 0       | 0.37    | 0      | 0      | 0      |
| GAIF01006713.1 | 5.19    | 2.26    | 0.57    | 0      | 0      | 0      |
| GAIF01006714.1 | 0       | 0       | 0       | 0.31   | 0      | 0      |
| GAIF01006715.1 | 52.98   | 59.08   | 102.33  | 169.51 | 120.19 | 59.6   |
| GAIF01006717.1 | 0       | 0       | 0       | 0.1    | 0.64   | 0      |
| GAIF01006718.1 | 1.2     | 2.14    | 0.08    | 3.6    | 3.9    | 0.08   |
| GAIF01006719.1 | 0.51    | 0.42    | 0.14    | 2.78   | 7.92   | 0.24   |
| GAIF01006720.1 | 0       | 0       | 0       | 0      | 0.19   | 0      |
| GAIF01006721.1 | 11.22   | 3.92    | 4.6     | 9      | 5.81   | 2.36   |
| GAIF01006723.1 | 4.9     | 8.68    | 3.54    | 16.58  | 9.6    | 1.08   |
| GAIF01006724.1 | 5.08    | 3.63    | 2.93    | 24.35  | 0.8    | 0.88   |
| GAIF01006725.1 | 0       | 0       | 0       | 0.31   | 2.43   | 0.29   |
| GAIF01006726.1 | 0       | 0       | 0       | 0      | 0.11   | 0      |
| GAIF01006728.1 | 0.31    | 0       | 0.23    | 0.12   | 2.38   | 0      |
| GAIF01006729.1 | 2.15    | 0.98    | 0.38    | 6.04   | 6.68   | 3.29   |
| GAIF01006731.1 | 4.27    | 6.03    | 3.77    | 3.5    | 6.98   | 1.16   |
| GAIF01006732.1 | 209.79  | 285.46  | 562.59  | 219.29 | 172.6  | 405.14 |
| GAIF01006734.1 | 0.23    | 0       | 0       | 0      | 0.09   | 0      |
| GAIF01006735.1 | 0       | 0.05    | 0       | 0      | 0      | 0.84   |

|                |        |        |        |        |        |        |
|----------------|--------|--------|--------|--------|--------|--------|
| GAIF01006737.1 | 0.04   | 0.05   | 0      | 0      | 0.37   | 0      |
| GAIF01006738.1 | 0.83   | 0.3    | 0.85   | 0.96   | 0.66   | 0.3    |
| GAIF01006740.1 | 0.14   | 0.04   | 0.34   | 0.36   | 0.33   | 0.11   |
| GAIF01006743.1 | 0      | 0.08   | 0      | 0.09   | 0.09   | 0.08   |
| GAIF01006744.1 | 0.01   | 0      | 0      | 0      | 0      | 0      |
| GAIF01006745.1 | 209.34 | 268.47 | 129.7  | 225.61 | 155.95 | 49.81  |
| GAIF01006747.1 | 8.38   | 3.75   | 4.63   | 28.91  | 50.98  | 3.05   |
| GAIF01006748.1 | 0      | 0      | 0      | 0.2    | 0.21   | 0      |
| GAIF01006749.1 | 1.12   | 0.26   | 0      | 2.77   | 10.44  | 0.09   |
| GAIF01006750.1 | 86.48  | 51.35  | 40.48  | 141.48 | 172.15 | 17.2   |
| GAIF01006753.1 | 0.53   | 0      | 0      | 0      | 0.17   | 0.09   |
| GAIF01006754.1 | 3.44   | 6.29   | 6.56   | 4.43   | 2.14   | 11.92  |
| GAIF01006755.1 | 0      | 1.57   | 0.55   | 0      | 0.15   | 0      |
| GAIF01006756.1 | 20.79  | 9.06   | 4.82   | 34.92  | 46.67  | 5.55   |
| GAIF01006758.1 | 9.33   | 9.84   | 12.47  | 40.16  | 36.06  | 7.27   |
| GAIF01006759.1 | 0.5    | 0      | 0      | 0.29   | 0      | 0      |
| GAIF01006761.1 | 0.06   | 0      | 0      | 0      | 0.33   | 0      |
| GAIF01006762.1 | 0.09   | 0.41   | 0.68   | 0.41   | 1.14   | 0      |
| GAIF01006764.1 | 0.09   | 0      | 0      | 0.44   | 0.68   | 0      |
| GAIF01006765.1 | 0.07   | 0.08   | 0      | 0.35   | 2.07   | 0      |
| GAIF01006766.1 | 4.77   | 3.33   | 3.51   | 2.1    | 1.45   | 0.61   |
| GAIF01006770.1 | 1.64   | 1.03   | 1.84   | 6.63   | 9.77   | 1.19   |
| GAIF01006773.1 | 0.13   | 0      | 0      | 0.15   | 0      | 0      |
| GAIF01006775.1 | 0      | 0      | 0      | 0      | 0.12   | 0      |
| GAIF01006776.1 | 441.31 | 440.48 | 126.75 | 693.83 | 976.8  | 258.32 |
| GAIF01006777.1 | 0      | 0.05   | 0      | 0      | 0      | 0      |
| GAIF01006778.1 | 0      | 0      | 0      | 0.08   | 0.51   | 0      |
| GAIF01006779.1 | 6.99   | 6.98   | 3.37   | 2.11   | 2.19   | 0.95   |
| GAIF01006783.1 | 0.68   | 0.47   | 0.17   | 0.3    | 2.76   | 0.54   |
| GAIF01006784.1 | 0.03   | 0.03   | 0.03   | 0.03   | 0.07   | 0      |
| GAIF01006785.1 | 10.75  | 0      | 0.34   | 4.52   | 3.75   | 6.01   |
| GAIF01006786.1 | 0.58   | 0      | 0.58   | 0.83   | 0      | 0      |
| GAIF01006787.1 | 71.64  | 63.16  | 45.45  | 135.65 | 193.96 | 194.11 |
| GAIF01006789.1 | 0      | 0.17   | 0      | 0.18   | 0.75   | 0      |
| GAIF01006790.1 | 2.99   | 2.03   | 1.86   | 6.36   | 5.03   | 4.42   |
| GAIF01006791.1 | 0      | 3.19   | 0      | 5.09   | 8.19   | 0      |
| GAIF01006792.1 | 0.03   | 0.07   | 0      | 0.04   | 1.5    | 0      |
| GAIF01006794.1 | 11.11  | 9.2    | 16.35  | 39.85  | 35.37  | 28.8   |
| GAIF01006795.1 | 0      | 0      | 0.26   | 0.41   | 0.56   | 0.26   |
| GAIF01006796.1 | 0.24   | 0.2    | 0      | 2.6    | 9.67   | 0.73   |
| GAIF01006797.1 | 13.07  | 8.44   | 2.9    | 57.09  | 26.87  | 2.05   |
| GAIF01006798.1 | 1.12   | 1.39   | 2.09   | 2.18   | 2.1    | 1.81   |
| GAIF01006799.1 | 0.12   | 0.18   | 0.05   | 0.06   | 0      | 0.03   |
| GAIF01006800.1 | 0.07   | 0.21   | 0.13   | 0.09   | 0.09   | 0      |

|                |        |       |        |        |        |        |
|----------------|--------|-------|--------|--------|--------|--------|
| GAIF01006801.1 | 0      | 0     | 0      | 0      | 0.14   | 0      |
| GAIF01006802.1 | 49.93  | 55.3  | 22.06  | 56.55  | 42.37  | 7.06   |
| GAIF01006803.1 | 42.19  | 31.29 | 21.7   | 147.86 | 177.84 | 18.08  |
| GAIF01006805.1 | 0      | 0.58  | 0.1    | 0      | 0      | 0.68   |
| GAIF01006806.1 | 0      | 0     | 0      | 0      | 0      | 0.1    |
| GAIF01006807.1 | 0.17   | 0.11  | 0      | 0      | 0      | 0.05   |
| GAIF01006808.1 | 0      | 0.06  | 0      | 0      | 0      | 0      |
| GAIF01006810.1 | 0.11   | 0.04  | 0      | 0.39   | 2.74   | 0.05   |
| GAIF01006812.1 | 30.22  | 38.18 | 35.45  | 92.42  | 81.68  | 23.14  |
| GAIF01006815.1 | 0      | 0.39  | 0.6    | 0      | 0      | 0.26   |
| GAIF01006816.1 | 4.59   | 6.93  | 4.43   | 9.49   | 6.76   | 1.45   |
| GAIF01006817.1 | 0      | 0     | 0      | 0      | 1.26   | 0      |
| GAIF01006818.1 | 0      | 0     | 0      | 0      | 0.43   | 0.07   |
| GAIF01006819.1 | 0.92   | 0.4   | 0.29   | 0.11   | 0.51   | 0      |
| GAIF01006820.1 | 0      | 0.01  | 0      | 0.01   | 0      | 0      |
| GAIF01006822.1 | 0.07   | 0.07  | 0      | 1.17   | 5.81   | 0.14   |
| GAIF01006825.1 | 0      | 0.12  | 0.35   | 0.25   | 0.15   | 0      |
| GAIF01006828.1 | 0.87   | 0.16  | 0.66   | 0.67   | 0.35   | 0.16   |
| GAIF01006829.1 | 0      | 0     | 0      | 0      | 1.91   | 0      |
| GAIF01006830.1 | 0      | 0     | 0      | 0.15   | 0.16   | 0      |
| GAIF01006832.1 | 37.26  | 26.11 | 12.57  | 45.38  | 61.46  | 63.55  |
| GAIF01006834.1 | 172.32 | 94.38 | 140.13 | 7.15   | 16.28  | 59.99  |
| GAIF01006838.1 | 49.85  | 51.21 | 22.36  | 144    | 113.91 | 5.64   |
| GAIF01006839.1 | 0.68   | 0.93  | 0.79   | 0.58   | 1.25   | 0.4    |
| GAIF01006841.1 | 35.38  | 16.82 | 9.34   | 94.26  | 127.41 | 9.71   |
| GAIF01006842.1 | 0      | 0.54  | 0.58   | 0      | 0.04   | 0.14   |
| GAIF01006844.1 | 44.68  | 29.35 | 33.85  | 53.97  | 36.33  | 50.16  |
| GAIF01006846.1 | 9.77   | 17.79 | 13     | 15.59  | 8.37   | 2.69   |
| GAIF01006847.1 | 13.63  | 7.1   | 0.85   | 14.86  | 13.25  | 18.25  |
| GAIF01006848.1 | 70.21  | 15.06 | 10.04  | 51.41  | 62.9   | 182.91 |
| GAIF01006849.1 | 7.21   | 1.18  | 0.26   | 6.54   | 43.71  | 1.59   |
| GAIF01006851.1 | 0      | 0     | 0      | 0.35   | 1.08   | 0.82   |
| GAIF01006852.1 | 0      | 0.05  | 0      | 0      | 0      | 0      |
| GAIF01006854.1 | 0      | 0     | 0      | 0      | 0.19   | 0      |
| GAIF01006855.1 | 0.15   | 0.08  | 0      | 0.09   | 0.18   | 0      |
| GAIF01006856.1 | 6.67   | 5.35  | 0.36   | 8.2    | 9.79   | 0      |
| GAIF01006857.1 | 9.71   | 3.48  | 6.36   | 13.08  | 17.17  | 19.8   |
| GAIF01006858.1 | 0      | 0     | 0      | 0      | 0.09   | 0.04   |
| GAIF01006859.1 | 36.48  | 27.65 | 15.34  | 3.44   | 0      | 7.51   |
| GAIF01006860.1 | 0.62   | 0.65  | 0      | 0.56   | 0      | 0      |
| GAIF01006861.1 | 0.07   | 0.08  | 0      | 0      | 0.09   | 0      |
| GAIF01006862.1 | 0.94   | 1.41  | 1.38   | 0.79   | 2.09   | 1.05   |
| GAIF01006863.1 | 3.61   | 1.8   | 0.17   | 0.86   | 6.84   | 1.59   |
| GAIF01006864.1 | 8.96   | 3.79  | 4.5    | 10.27  | 21.21  | 28.53  |

|                |        |        |        |        |        |        |
|----------------|--------|--------|--------|--------|--------|--------|
| GAIF01006865.1 | 1.88   | 0.37   | 1.4    | 2.11   | 2.83   | 0.82   |
| GAIF01006866.1 | 1.14   | 0.76   | 0.09   | 9.25   | 34.16  | 0.05   |
| GAIF01006867.1 | 4.7    | 3.54   | 8.59   | 7.72   | 1.88   | 3.28   |
| GAIF01006868.1 | 0.17   | 0      | 0      | 0      | 0      | 0      |
| GAIF01006869.1 | 0.37   | 0.09   | 0.12   | 0.16   | 0.12   | 0.12   |
| GAIF01006870.1 | 0      | 0      | 0      | 0.1    | 0      | 0      |
| GAIF01006872.1 | 47.37  | 28.83  | 86.05  | 134.77 | 58.38  | 376.5  |
| GAIF01006873.1 | 0.1    | 0.11   | 0      | 0.12   | 0.49   | 0.23   |
| GAIF01006875.1 | 0.34   | 0.28   | 0.19   | 0.1    | 0.1    | 0.05   |
| GAIF01006877.1 | 0      | 0      | 0      | 0      | 0.13   | 0      |
| GAIF01006879.1 | 0      | 0      | 0      | 0      | 0.13   | 0      |
| GAIF01006881.1 | 0.75   | 0.96   | 0.07   | 4.03   | 6.71   | 0      |
| GAIF01006882.1 | 0.76   | 0.12   | 0      | 7.16   | 25.41  | 0.42   |
| GAIF01006883.1 | 0.11   | 0.06   | 0      | 1.22   | 3.2    | 1.16   |
| GAIF01006884.1 | 0      | 0      | 0      | 0.11   | 0      | 0      |
| GAIF01006886.1 | 1.71   | 1.21   | 0.45   | 0.89   | 0.21   | 0      |
| GAIF01006887.1 | 0      | 0      | 0      | 0      | 0.32   | 0      |
| GAIF01006888.1 | 0.19   | 0.05   | 0.05   | 0.06   | 0.06   | 0.05   |
| GAIF01006889.1 | 0.64   | 0      | 0.17   | 3.23   | 9.22   | 0.92   |
| GAIF01006890.1 | 0.04   | 0      | 0      | 0.26   | 1.02   | 0.05   |
| GAIF01006892.1 | 21.15  | 1.59   | 1.43   | 1.39   | 0.35   | 0      |
| GAIF01006893.1 | 0.59   | 0.04   | 0.03   | 1.28   | 0.15   | 0      |
| GAIF01006894.1 | 187.43 | 330.42 | 476.66 | 823.84 | 589.19 | 109    |
| GAIF01006897.1 | 8.51   | 12.81  | 6.81   | 43.76  | 63.72  | 9.44   |
| GAIF01006899.1 | 0      | 0      | 0      | 0.32   | 1.48   | 0.09   |
| GAIF01006900.1 | 183.78 | 98.22  | 44.21  | 132.87 | 169.17 | 147.56 |
| GAIF01006901.1 | 0      | 0      | 0      | 0      | 0.09   | 0      |
| GAIF01006902.1 | 1.17   | 0.85   | 0.21   | 5.21   | 21.47  | 0.86   |
| GAIF01006903.1 | 0.55   | 0.18   | 0.24   | 4.44   | 15.43  | 0.18   |
| GAIF01006905.1 | 0.71   | 0.39   | 0.31   | 0.66   | 0.17   | 0.16   |
| GAIF01006906.1 | 0      | 0.26   | 0      | 0      | 0      | 0.17   |
| GAIF01006907.1 | 0.37   | 0.08   | 0      | 0.63   | 2.16   | 0      |
| GAIF01006908.1 | 0.09   | 0.1    | 0      | 0.86   | 3      | 0.1    |
| GAIF01006911.1 | 11.85  | 15.74  | 12.3   | 1.31   | 1.16   | 0.06   |
| GAIF01006912.1 | 0      | 0      | 0      | 0.22   | 1.43   | 0      |
| GAIF01006913.1 | 0.06   | 0.06   | 0      | 0      | 0      | 0      |
| GAIF01006914.1 | 0.23   | 0.25   | 0.2    | 0.64   | 4.72   | 0.15   |
| GAIF01006915.1 | 0      | 0      | 0      | 0.18   | 0.73   | 0.84   |
| GAIF01006916.1 | 1.96   | 1.6    | 2.16   | 0.95   | 0.2    | 1.44   |
| GAIF01006917.1 | 0.39   | 0      | 0      | 0.25   | 2.23   | 0      |
| GAIF01006918.1 | 0      | 0      | 0      | 0      | 0.05   | 0      |
| GAIF01006919.1 | 0      | 0      | 0.64   | 0      | 4.08   | 0.23   |
| GAIF01006921.1 | 0.06   | 0      | 0.02   | 0      | 0      | 0      |
| GAIF01006924.1 | 0      | 0      | 0.3    | 0      | 0      | 0      |



|                |        |        |         |        |        |        |
|----------------|--------|--------|---------|--------|--------|--------|
| GAIF01006925.1 | 4.65   | 8.29   | 3.34    | 18.11  | 10.82  | 1.18   |
| GAIF01006926.1 | 0      | 0      | 0       | 0      | 0.37   | 0.08   |
| GAIF01006927.1 | 0      | 0      | 0       | 0.25   | 4.31   | 0      |
| GAIF01006929.1 | 0      | 0.03   | 0       | 0      | 0      | 0      |
| GAIF01006930.1 | 6.68   | 7.48   | 7.26    | 9.55   | 6.81   | 5.2    |
| GAIF01006931.1 | 0      | 0      | 0       | 0.59   | 4.32   | 0      |
| GAIF01006933.1 | 0.22   | 0.71   | 0       | 0.5    | 3.38   | 0      |
| GAIF01006934.1 | 0.04   | 0      | 0       | 0      | 0      | 0      |
| GAIF01006935.1 | 0.06   | 0      | 0       | 0.39   | 2.24   | 0.06   |
| GAIF01006937.1 | 0      | 0      | 0.16    | 0      | 0      | 0      |
| GAIF01006938.1 | 8.06   | 4.44   | 5.42    | 26.54  | 30.85  | 15.79  |
| GAIF01006939.1 | 9.67   | 3.3    | 6.46    | 17.4   | 21.77  | 40.42  |
| GAIF01006940.1 | 0.36   | 0.59   | 0       | 2.21   | 6.01   | 0      |
| GAIF01006941.1 | 0      | 0      | 0       | 0      | 0.33   | 0      |
| GAIF01006942.1 | 0.2    | 0      | 0       | 0.39   | 0.57   | 0.22   |
| GAIF01006943.1 | 0      | 0      | 0       | 0      | 0.1    | 0      |
| GAIF01006944.1 | 256.81 | 289.8  | 396.43  | 212.72 | 170.36 | 198.56 |
| GAIF01006945.1 | 0      | 0      | 0       | 0.11   | 0.2    | 0      |
| GAIF01006946.1 | 0      | 0      | 0       | 0.32   | 0      | 0      |
| GAIF01006947.1 | 0      | 0      | 0       | 0      | 0.07   | 0      |
| GAIF01006949.1 | 0      | 0.29   | 0.96    | 0      | 0      | 0.1    |
| GAIF01006950.1 | 0.19   | 0.28   | 0.06    | 1.44   | 12.4   | 0.29   |
| GAIF01006954.1 | 5.16   | 8.74   | 5.29    | 8.14   | 6.99   | 1.21   |
| GAIF01006955.1 | 0.48   | 0      | 0.24    | 6.98   | 12.31  | 0      |
| GAIF01006959.1 | 5.4    | 6.87   | 2.42    | 16.9   | 16.91  | 1.64   |
| GAIF01006960.1 | 4.07   | 5.04   | 2.98    | 1.71   | 1.5    | 0.62   |
| GAIF01006961.1 | 0      | 0.05   | 0       | 0      | 0.05   | 0      |
| GAIF01006963.1 | 22.85  | 12.8   | 20.41   | 49.71  | 126.51 | 59.83  |
| GAIF01006964.1 | 10.43  | 3.33   | 0.13    | 10.11  | 13.87  | 0      |
| GAIF01006965.1 | 0.1    | 0      | 0       | 0.37   | 3.27   | 0.46   |
| GAIF01006967.1 | 1.73   | 0.12   | 0       | 2.01   | 9.24   | 0.48   |
| GAIF01006968.1 | 7.97   | 6.4    | 10      | 18.07  | 17.47  | 7.11   |
| GAIF01006969.1 | 0      | 0      | 0       | 0      | 0.46   | 0.08   |
| GAIF01006970.1 | 4.03   | 1.2    | 0       | 1.04   | 0      | 0.32   |
| GAIF01006972.1 | 0.07   | 0.04   | 0       | 0.53   | 4.47   | 0.47   |
| GAIF01006973.1 | 0.17   | 0.09   | 0       | 2.06   | 7.94   | 0.47   |
| GAIF01006974.1 | 35.14  | 29.18  | 19.5    | 40.52  | 39.86  | 8.84   |
| GAIF01006975.1 | 13.35  | 39.72  | 62.19   | 37.86  | 22.71  | 11.41  |
| GAIF01006976.1 | 6.59   | 6.68   | 8.7     | 25.44  | 11.19  | 0      |
| GAIF01006977.1 | 0      | 0      | 0       | 0      | 18.05  | 0      |
| GAIF01006978.1 | 0      | 0.18   | 0.14    | 0.64   | 4.88   | 0      |
| GAIF01006979.1 | 387.08 | 953.43 | 1246.66 | 160.74 | 464.86 | 393.02 |
| GAIF01006980.1 | 0.03   | 0      | 0       | 0.21   | 1.18   | 0      |
| GAIF01006982.1 | 7.67   | 4.11   | 5.57    | 1.83   | 0.61   | 0.37   |

|                |        |        |        |        |        |        |
|----------------|--------|--------|--------|--------|--------|--------|
| GAIF01006983.1 | 0.2    | 0.06   | 0      | 0.17   | 0.21   | 0      |
| GAIF01006984.1 | 12.75  | 12.21  | 11.31  | 28.49  | 28.87  | 4.6    |
| GAIF01006985.1 | 0      | 0      | 0      | 0.06   | 0.12   | 0      |
| GAIF01006987.1 | 16.29  | 15.96  | 1.27   | 72.11  | 120.46 | 8.67   |
| GAIF01006988.1 | 13.23  | 12.73  | 6.91   | 29.97  | 18.36  | 5.33   |
| GAIF01006989.1 | 3.93   | 3.55   | 1.03   | 1.76   | 0.84   | 0.13   |
| GAIF01006991.1 | 0.07   | 0      | 0      | 0.05   | 0.17   | 0      |
| GAIF01006992.1 | 0.7    | 0.9    | 0      | 0      | 0      | 0      |
| GAIF01006994.1 | 2.69   | 5.17   | 3.09   | 1.15   | 1.43   | 0.13   |
| GAIF01006996.1 | 0.12   | 0      | 0      | 0      | 0      | 0      |
| GAIF01006997.1 | 0.21   | 0      | 0.11   | 0      | 0.07   | 0      |
| GAIF01006999.1 | 0.04   | 0.04   | 0      | 0.29   | 1.09   | 0      |
| GAIF01007000.1 | 0      | 0.1    | 0.2    | 0.41   | 0      | 0.2    |
| GAIF01007003.1 | 0.04   | 0      | 0.06   | 0.08   | 0      | 0.26   |
| GAIF01007005.1 | 0.2    | 0.02   | 0.01   | 1.75   | 0.08   | 0      |
| GAIF01007006.1 | 2.12   | 3.07   | 1.77   | 1.76   | 1.34   | 0.11   |
| GAIF01007007.1 | 1.19   | 0.73   | 0      | 4.41   | 0      | 0.8    |
| GAIF01007008.1 | 3.99   | 3.22   | 2.6    | 15.97  | 17.97  | 0.98   |
| GAIF01007009.1 | 0.03   | 0      | 0      | 0      | 0      | 0      |
| GAIF01007011.1 | 0.28   | 0.31   | 0.34   | 0.21   | 0.4    | 0      |
| GAIF01007012.1 | 16.55  | 18.92  | 12.18  | 2.91   | 2.49   | 0.26   |
| GAIF01007014.1 | 0      | 0      | 0      | 0      | 0.25   | 0      |
| GAIF01007015.1 | 0.49   | 0      | 0      | 1.43   | 5.03   | 2.17   |
| GAIF01007016.1 | 9.11   | 0      | 0      | 11.21  | 13.76  | 2.87   |
| GAIF01007018.1 | 185.52 | 183.79 | 370.53 | 196.74 | 143.71 | 215.53 |
| GAIF01007019.1 | 0      | 0      | 0      | 0      | 0.13   | 0      |
| GAIF01007020.1 | 0.31   | 0      | 0      | 0.21   | 0      | 0      |
| GAIF01007021.1 | 0.06   | 0      | 0      | 0      | 0.07   | 0.06   |
| GAIF01007023.1 | 0.68   | 0      | 1.05   | 1.74   | 2.3    | 0      |
| GAIF01007025.1 | 9.78   | 9.66   | 12.83  | 6.65   | 18.45  | 9.27   |
| GAIF01007027.1 | 7.05   | 6.09   | 6.33   | 12.08  | 9.82   | 6      |
| GAIF01007030.1 | 0.08   | 0      | 0      | 0      | 0.09   | 0      |
| GAIF01007031.1 | 0      | 0.29   | 0      | 0      | 0      | 0      |
| GAIF01007033.1 | 0      | 0      | 0      | 0.12   | 0.34   | 0      |
| GAIF01007035.1 | 0      | 0.31   | 0.24   | 0      | 0.06   | 0.05   |
| GAIF01007036.1 | 0      | 0      | 0      | 0      | 0.01   | 0      |
| GAIF01007037.1 | 2.56   | 1.67   | 1.97   | 2.82   | 0.31   | 2.4    |
| GAIF01007038.1 | 3.11   | 1.66   | 0.7    | 8.77   | 23     | 6.3    |
| GAIF01007039.1 | 1.06   | 0      | 0.46   | 0      | 0      | 0      |
| GAIF01007040.1 | 1.36   | 0.51   | 0.2    | 7.99   | 24.16  | 0.58   |
| GAIF01007041.1 | 0      | 0      | 0      | 0.14   | 0.67   | 0      |
| GAIF01007042.1 | 0      | 0      | 0.09   | 0.18   | 0      | 0      |
| GAIF01007043.1 | 0.06   | 0.07   | 0      | 1.02   | 3.19   | 0.07   |
| GAIF01007044.1 | 35.03  | 18.65  | 2.15   | 59.16  | 92.9   | 24.85  |

|                |         |        |        |        |        |         |
|----------------|---------|--------|--------|--------|--------|---------|
| GAIF01007045.1 | 0.17    | 0.22   | 0.04   | 0.09   | 0.38   | 0       |
| GAIF01007046.1 | 0.36    | 0.06   | 0      | 1.73   | 7.66   | 0       |
| GAIF01007048.1 | 0.1     | 0      | 0      | 0.23   | 1.39   | 0       |
| GAIF01007049.1 | 0       | 0      | 0      | 0.23   | 2.7    | 0       |
| GAIF01007051.1 | 0.9     | 0      | 0.21   | 2.84   | 5.23   | 0       |
| GAIF01007052.1 | 0.09    | 0      | 0      | 0      | 0      | 0       |
| GAIF01007055.1 | 35.86   | 48.77  | 37.96  | 90.75  | 68.26  | 8.07    |
| GAIF01007058.1 | 0       | 0.13   | 0.4    | 0      | 0      | 0       |
| GAIF01007059.1 | 0       | 0.07   | 0      | 0.08   | 0      | 0       |
| GAIF01007061.1 | 13.51   | 13.29  | 5.69   | 15.07  | 16.18  | 1.53    |
| GAIF01007065.1 | 0       | 0      | 0      | 0      | 0      | 0.14    |
| GAIF01007066.1 | 113.99  | 123.45 | 110.11 | 146.04 | 126.99 | 225.66  |
| GAIF01007067.1 | 0       | 0      | 0      | 0      | 0.07   | 0       |
| GAIF01007068.1 | 0.08    | 0      | 0      | 0.09   | 0.39   | 0.27    |
| GAIF01007071.1 | 1399.28 | 521.04 | 312.45 | 885.08 | 1536.1 | 2979.27 |
| GAIF01007073.1 | 29.21   | 17.97  | 24.46  | 21.4   | 13.61  | 75.46   |
| GAIF01007074.1 | 0       | 0.07   | 0      | 0.76   | 9.65   | 0.05    |
| GAIF01007076.1 | 3.78    | 2.38   | 4.71   | 7.52   | 8.16   | 1.86    |
| GAIF01007077.1 | 0.2     | 0      | 0      | 0.06   | 0.18   | 0       |
| GAIF01007078.1 | 132.52  | 126.25 | 117.91 | 280.83 | 190    | 66.69   |
| GAIF01007079.1 | 0.45    | 0      | 0      | 0.17   | 0      | 0       |
| GAIF01007080.1 | 3.13    | 1.91   | 3.16   | 2.33   | 0.75   | 1.93    |
| GAIF01007081.1 | 0       | 0.1    | 0      | 0      | 0      | 0       |
| GAIF01007082.1 | 0.17    | 0      | 0      | 0      | 0      | 0       |
| GAIF01007083.1 | 53.36   | 29.39  | 54.06  | 17.73  | 5.73   | 18.98   |
| GAIF01007084.1 | 0.32    | 0.52   | 0.23   | 0.55   | 1.34   | 0.18    |
| GAIF01007085.1 | 27.83   | 10.96  | 6.35   | 59.08  | 83.03  | 29.3    |
| GAIF01007086.1 | 166.87  | 98.45  | 165.06 | 7.9    | 0      | 5       |
| GAIF01007088.1 | 0       | 0      | 0      | 0      | 0.06   | 0       |
| GAIF01007089.1 | 2.52    | 1.4    | 4.05   | 3.65   | 1.96   | 5.37    |
| GAIF01007090.1 | 0       | 0      | 0      | 0.09   | 0.29   | 0.09    |
| GAIF01007092.1 | 20.69   | 5.72   | 1.74   | 39.69  | 73.67  | 39.26   |
| GAIF01007093.1 | 0.04    | 0      | 0      | 0.33   | 1.39   | 0       |
| GAIF01007094.1 | 6.22    | 14.81  | 10.49  | 15.42  | 12.64  | 0.15    |
| GAIF01007095.1 | 0       | 0.33   | 0.92   | 0.64   | 0.38   | 0       |
| GAIF01007096.1 | 0.36    | 0      | 0      | 0.28   | 0.58   | 0.13    |
| GAIF01007097.1 | 5.9     | 1.24   | 0.44   | 15.9   | 17.5   | 4       |
| GAIF01007098.1 | 0       | 0      | 0      | 0      | 0.09   | 0       |
| GAIF01007099.1 | 4.63    | 1.08   | 0.39   | 36.37  | 88.64  | 0.94    |
| GAIF01007100.1 | 0       | 0      | 0      | 0.03   | 0.13   | 0       |
| GAIF01007101.1 | 0       | 0      | 0      | 0.22   | 1.45   | 0       |
| GAIF01007102.1 | 20.56   | 5.86   | 3.34   | 72.95  | 136.21 | 26.54   |
| GAIF01007103.1 | 0.14    | 0      | 0      | 0      | 0      | 0       |
| GAIF01007104.1 | 5.15    | 0.71   | 0.11   | 37.48  | 116.86 | 3.93    |

|                |         |         |         |         |         |         |
|----------------|---------|---------|---------|---------|---------|---------|
| GAIF01007106.1 | 0       | 0       | 0       | 0       | 1.53    | 0       |
| GAIF01007107.1 | 0.24    | 0.11    | 0.03    | 1.19    | 5.45    | 0.99    |
| GAIF01007108.1 | 0       | 0.76    | 0.57    | 0       | 0.04    | 4.28    |
| GAIF01007109.1 | 16.27   | 14.8    | 0       | 0       | 24.99   | 8.3     |
| GAIF01007110.1 | 9.86    | 18.11   | 10.99   | 21.9    | 12.04   | 1.43    |
| GAIF01007111.1 | 4350.09 | 4890.12 | 9290.64 | 2386.26 | 1669.52 | 6245.17 |
| GAIF01007112.1 | 0.46    | 0.13    | 0.32    | 0.54    | 1.26    | 0.38    |
| GAIF01007113.1 | 1.01    | 0.05    | 0.2     | 3.47    | 15.04   | 0.91    |
| GAIF01007114.1 | 0       | 0       | 0       | 0.54    | 6.75    | 0.34    |
| GAIF01007116.1 | 3.55    | 0.5     | 0.76    | 4.21    | 7.52    | 31.3    |
| GAIF01007117.1 | 0.07    | 0.22    | 0       | 1.54    | 3.93    | 0.44    |
| GAIF01007118.1 | 3.4     | 0.34    | 0       | 0.28    | 6.54    | 0.32    |
| GAIF01007120.1 | 0.06    | 0.12    | 0       | 0       | 0       | 0       |
| GAIF01007121.1 | 0       | 0.05    | 0       | 0       | 0       | 0       |
| GAIF01007123.1 | 0       | 0       | 0       | 0.38    | 0.62    | 0       |
| GAIF01007126.1 | 0.08    | 0       | 0       | 0       | 0       | 0       |
| GAIF01007127.1 | 0.1     | 0       | 0       | 0       | 0       | 0       |
| GAIF01007128.1 | 3.27    | 2.7     | 0.57    | 11.52   | 7.54    | 3.6     |
| GAIF01007129.1 | 0.29    | 0.42    | 0       | 0.89    | 0.7     | 0.11    |
| GAIF01007130.1 | 0.09    | 0.07    | 0.34    | 0       | 0       | 0       |
| GAIF01007131.1 | 0       | 0       | 0       | 0       | 0.34    | 0       |
| GAIF01007132.1 | 0.16    | 0.38    | 0.26    | 0.41    | 1.08    | 0.26    |
| GAIF01007133.1 | 0.28    | 0.12    | 0.19    | 5.9     | 12.13   | 0.34    |
| GAIF01007134.1 | 0       | 0.3     | 0       | 0       | 0.8     | 0       |
| GAIF01007135.1 | 0       | 0.15    | 0       | 0.33    | 1.37    | 0.31    |
| GAIF01007136.1 | 1.18    | 0       | 0.42    | 0       | 0       | 0       |
| GAIF01007137.1 | 0.2     | 0.04    | 0.04    | 0.58    | 4.79    | 0.04    |
| GAIF01007138.1 | 0       | 0       | 0.16    | 0       | 0       | 0       |
| GAIF01007139.1 | 0       | 0       | 0       | 0.45    | 0       | 0       |
| GAIF01007142.1 | 0       | 0       | 0       | 0       | 0.07    | 0.07    |
| GAIF01007143.1 | 62.12   | 28.51   | 21.23   | 107.16  | 142.05  | 120.23  |
| GAIF01007144.1 | 25.27   | 6.73    | 7.21    | 8       | 4.94    | 2.71    |
| GAIF01007145.1 | 0       | 0       | 0       | 0.09    | 1.01    | 0       |
| GAIF01007147.1 | 0       | 0       | 0       | 0.66    | 2.33    | 0       |
| GAIF01007148.1 | 16.89   | 28.17   | 15.54   | 91.47   | 107.5   | 12.58   |
| GAIF01007149.1 | 0       | 0       | 0       | 0.36    | 2.03    | 0       |
| GAIF01007150.1 | 2.66    | 0.98    | 0.01    | 6.56    | 5.75    | 4.68    |
| GAIF01007152.1 | 0       | 0       | 0       | 0       | 0.21    | 0       |
| GAIF01007153.1 | 0       | 0       | 0       | 0       | 1.22    | 0       |
| GAIF01007155.1 | 0       | 0.07    | 0       | 0       | 0.22    | 0       |
| GAIF01007157.1 | 19.1    | 9.26    | 3.08    | 0       | 0.11    | 0       |
| GAIF01007158.1 | 0       | 0       | 0       | 0.08    | 0.32    | 0       |
| GAIF01007159.1 | 1.22    | 0.05    | 0.15    | 0.48    | 0.82    | 1.04    |
| GAIF01007160.1 | 22.85   | 24.69   | 8.11    | 77.28   | 35.52   | 3.22    |

|                |         |         |        |        |        |        |
|----------------|---------|---------|--------|--------|--------|--------|
| GAIF01007161.1 | 0       | 0.33    | 0      | 0      | 0      | 0      |
| GAIF01007162.1 | 0       | 0       | 0      | 0      | 1.85   | 0      |
| GAIF01007165.1 | 168.9   | 63.55   | 33.58  | 133.51 | 146.4  | 22.32  |
| GAIF01007166.1 | 0.29    | 0.32    | 0.06   | 0.29   | 1.07   | 0      |
| GAIF01007167.1 | 3.11    | 0.81    | 0.69   | 13.19  | 42.45  | 6.26   |
| GAIF01007168.1 | 685.86  | 436.15  | 336.11 | 552.51 | 391.52 | 316.5  |
| GAIF01007169.1 | 0.07    | 0.07    | 0.23   | 0.59   | 0.48   | 0.05   |
| GAIF01007170.1 | 0.62    | 1.29    | 0.74   | 1.5    | 0.93   | 0.11   |
| GAIF01007171.1 | 1346.42 | 1216.86 | 849.6  | 738.99 | 495.21 | 233.37 |
| GAIF01007173.1 | 8.39    | 17.96   | 6.82   | 8.87   | 6.24   | 0.6    |
| GAIF01007174.1 | 4.06    | 2.22    | 3.97   | 5.09   | 1.69   | 2.16   |
| GAIF01007175.1 | 0.19    | 0.07    | 0      | 0.15   | 0.46   | 0      |
| GAIF01007177.1 | 257.76  | 227.89  | 152.63 | 59.06  | 130.42 | 19.66  |
| GAIF01007178.1 | 1.43    | 0.41    | 0.91   | 2.37   | 1.09   | 0.64   |
| GAIF01007179.1 | 0       | 0.13    | 0.14   | 0      | 0.3    | 0      |
| GAIF01007180.1 | 0       | 0.28    | 1.48   | 0      | 0      | 1.15   |
| GAIF01007181.1 | 11.43   | 5.61    | 0.48   | 34.84  | 49.05  | 5.34   |
| GAIF01007182.1 | 0       | 0.36    | 0.55   | 0      | 0      | 0      |
| GAIF01007183.1 | 0.19    | 0.04    | 0.25   | 1.78   | 5.41   | 1.07   |
| GAIF01007184.1 | 3.08    | 1.41    | 0.34   | 4.27   | 8.37   | 11.83  |
| GAIF01007186.1 | 0       | 0       | 0      | 0      | 0.1    | 0      |
| GAIF01007187.1 | 5.53    | 2.06    | 1.26   | 3.99   | 22.14  | 14.98  |
| GAIF01007188.1 | 0.07    | 0.08    | 0.08   | 0      | 0      | 0      |
| GAIF01007189.1 | 841.78  | 368.5   | 439.76 | 535.49 | 202.33 | 441.74 |
| GAIF01007190.1 | 0       | 0.07    | 0      | 0.04   | 0.05   | 0      |
| GAIF01007191.1 | 24.14   | 38.47   | 36.08  | 38.32  | 32.33  | 2.56   |
| GAIF01007192.1 | 0.23    | 0       | 0      | 1.57   | 4.88   | 0.75   |
| GAIF01007193.1 | 0.05    | 0.03    | 0      | 0.03   | 0      | 0      |
| GAIF01007194.1 | 1.21    | 0       | 0      | 1.64   | 8.97   | 1.7    |
| GAIF01007195.1 | 0.04    | 0.04    | 0.01   | 0.1    | 0.02   | 0      |
| GAIF01007197.1 | 12.88   | 19.87   | 6.23   | 51.29  | 33.54  | 2.13   |
| GAIF01007199.1 | 0       | 0.54    | 0      | 0.57   | 0      | 0.27   |
| GAIF01007201.1 | 0.05    | 0.11    | 0      | 0.23   | 1.07   | 0      |
| GAIF01007202.1 | 95.58   | 13.25   | 2.1    | 296.26 | 703.41 | 43.12  |
| GAIF01007203.1 | 0.08    | 0       | 0      | 0      | 0      | 0      |
| GAIF01007205.1 | 0       | 0       | 0      | 0      | 0.57   | 0      |
| GAIF01007206.1 | 1.57    | 0.62    | 0.31   | 4.8    | 8.24   | 0.16   |
| GAIF01007208.1 | 0       | 0       | 0      | 0.35   | 1.99   | 0      |
| GAIF01007210.1 | 13.05   | 4.83    | 2.79   | 1      | 0.83   | 1.57   |
| GAIF01007212.1 | 0       | 0       | 0      | 0      | 0.18   | 0      |
| GAIF01007213.1 | 0       | 0       | 0      | 0.23   | 1.06   | 0.11   |
| GAIF01007215.1 | 4.59    | 8.47    | 3.7    | 17.05  | 16.02  | 1.41   |
| GAIF01007217.1 | 0       | 0       | 0      | 0      | 0.08   | 0      |
| GAIF01007220.1 | 53.72   | 99.99   | 23.74  | 148.95 | 133.21 | 8.27   |

|                |         |         |         |        |         |         |
|----------------|---------|---------|---------|--------|---------|---------|
| GAIF01007221.1 | 68.33   | 68.92   | 115.08  | 206.7  | 107.46  | 75.65   |
| GAIF01007222.1 | 0.52    | 0.65    | 0       | 3.38   | 5.66    | 1.23    |
| GAIF01007223.1 | 15.58   | 15.18   | 16.57   | 34.14  | 20.75   | 7.72    |
| GAIF01007225.1 | 0       | 0.04    | 0.04    | 0      | 0       | 0       |
| GAIF01007227.1 | 0       | 0       | 0       | 0      | 0.37    | 0.06    |
| GAIF01007228.1 | 3.92    | 5.3     | 0       | 1.82   | 0       | 0.29    |
| GAIF01007229.1 | 3.9     | 1.32    | 1.77    | 21.29  | 81.89   | 45.98   |
| GAIF01007230.1 | 0.94    | 0.09    | 0       | 5.57   | 31.89   | 0.69    |
| GAIF01007232.1 | 8.58    | 11.86   | 7.81    | 37.14  | 27.33   | 4.26    |
| GAIF01007233.1 | 0.87    | 0.12    | 0.06    | 0.13   | 0       | 0.06    |
| GAIF01007234.1 | 0.01    | 0       | 0.03    | 0      | 0       | 0       |
| GAIF01007235.1 | 57.49   | 42.92   | 37.21   | 118.5  | 76.62   | 23.4    |
| GAIF01007236.1 | 0       | 0       | 0       | 0.1    | 0       | 0       |
| GAIF01007238.1 | 5375.79 | 3541.95 | 2369.47 | 4047.1 | 3449.12 | 2308.36 |
| GAIF01007239.1 | 3.72    | 2.16    | 0.23    | 19.21  | 33.13   | 0.4     |
| GAIF01007240.1 | 0       | 0       | 0       | 0      | 0.02    | 0       |
| GAIF01007242.1 | 1.84    | 1.26    | 1.43    | 9.87   | 20.42   | 0.4     |
| GAIF01007245.1 | 0       | 0       | 0       | 0      | 0.12    | 0       |
| GAIF01007246.1 | 0.31    | 0.27    | 0.08    | 3.17   | 12.6    | 0.08    |
| GAIF01007247.1 | 0       | 0.22    | 0       | 0      | 0.1     | 0       |
| GAIF01007248.1 | 0       | 0.05    | 0       | 0      | 0       | 0.27    |
| GAIF01007249.1 | 0.06    | 0.25    | 0.34    | 0.23   | 0.18    | 0       |
| GAIF01007253.1 | 1.01    | 0.22    | 0       | 0.45   | 10.09   | 0.63    |
| GAIF01007254.1 | 0.02    | 0.02    | 0.02    | 0      | 0.48    | 0       |
| GAIF01007255.1 | 1.11    | 0.13    | 0       | 3.74   | 19.81   | 2.73    |
| GAIF01007256.1 | 9.85    | 16.33   | 12.47   | 12.6   | 13.97   | 2.5     |
| GAIF01007257.1 | 0       | 0       | 0       | 0      | 5.52    | 0       |
| GAIF01007259.1 | 49.54   | 36.03   | 18.36   | 13.56  | 13.31   | 7.68    |
| GAIF01007260.1 | 12.38   | 16.22   | 6.55    | 13.51  | 34.63   | 3.12    |
| GAIF01007261.1 | 0.07    | 0       | 0.18    | 0      | 0       | 0       |
| GAIF01007262.1 | 45.1    | 19.32   | 20.57   | 36.82  | 59.43   | 226.53  |
| GAIF01007263.1 | 0.12    | 0       | 0.25    | 0      | 0       | 0       |
| GAIF01007264.1 | 1.63    | 0.75    | 0       | 3.46   | 2.22    | 0.54    |
| GAIF01007267.1 | 39.67   | 34.5    | 14.47   | 108.8  | 57.98   | 6.38    |
| GAIF01007268.1 | 8.32    | 4.02    | 1.01    | 10.37  | 12.6    | 2.21    |
| GAIF01007269.1 | 25.21   | 11.11   | 22.59   | 53.05  | 36.08   | 78.18   |
| GAIF01007271.1 | 0.62    | 0.47    | 0.26    | 0.29   | 0       | 0.21    |
| GAIF01007272.1 | 3.62    | 3.17    | 0.21    | 19.15  | 50.52   | 8.53    |
| GAIF01007273.1 | 0       | 0       | 0       | 0      | 0.08    | 0       |
| GAIF01007274.1 | 17.29   | 6.91    | 15.33   | 41.49  | 24.07   | 13.67   |
| GAIF01007276.1 | 0.16    | 0       | 0.17    | 0.18   | 0       | 0       |
| GAIF01007277.1 | 0.39    | 0.25    | 0.59    | 0.23   | 0       | 0.32    |
| GAIF01007278.1 | 0.44    | 0.28    | 0.62    | 1.48   | 1.2     | 0.65    |
| GAIF01007279.1 | 0       | 0       | 0       | 0      | 0.17    | 0       |

|                |        |        |        |        |        |        |
|----------------|--------|--------|--------|--------|--------|--------|
| GAIF01007280.1 | 40.64  | 32.27  | 21.25  | 30.08  | 30.83  | 5.65   |
| GAIF01007282.1 | 0      | 0      | 0      | 0.05   | 0      | 0      |
| GAIF01007283.1 | 0.05   | 0      | 0      | 0      | 0.24   | 0      |
| GAIF01007284.1 | 23.88  | 7.55   | 9.9    | 1.7    | 0.44   | 2.69   |
| GAIF01007286.1 | 0.26   | 0.09   | 0      | 1.51   | 3.87   | 0.77   |
| GAIF01007288.1 | 2.68   | 5.92   | 1.68   | 14.77  | 25.83  | 0.1    |
| GAIF01007289.1 | 0.11   | 0      | 0      | 2.65   | 7.58   | 0.48   |
| GAIF01007290.1 | 0      | 0      | 0      | 0.35   | 0      | 0      |
| GAIF01007291.1 | 31     | 19.66  | 33.85  | 51.97  | 19.89  | 34.93  |
| GAIF01007292.1 | 0.27   | 0      | 0      | 0.05   | 0.05   | 0      |
| GAIF01007294.1 | 0      | 0.08   | 0.08   | 0      | 0      | 0.01   |
| GAIF01007295.1 | 0.21   | 0.45   | 0.23   | 1.68   | 10.2   | 1.14   |
| GAIF01007297.1 | 49.39  | 50.77  | 95.89  | 156.21 | 63.03  | 109.65 |
| GAIF01007298.1 | 0.13   | 0      | 0      | 0      | 0      | 0      |
| GAIF01007299.1 | 6.36   | 9.02   | 10.79  | 18.79  | 14.34  | 4.44   |
| GAIF01007301.1 | 0      | 0      | 0.6    | 0      | 0      | 0      |
| GAIF01007302.1 | 0      | 0.21   | 0      | 0      | 0      | 0      |
| GAIF01007303.1 | 0      | 0      | 0      | 0      | 0.16   | 0      |
| GAIF01007305.1 | 0      | 0      | 0      | 0      | 0.78   | 0      |
| GAIF01007307.1 | 9.03   | 13.34  | 12.78  | 48.46  | 27     | 8.54   |
| GAIF01007308.1 | 0      | 0      | 0      | 0.86   | 1.97   | 0      |
| GAIF01007309.1 | 0      | 0      | 0      | 0.97   | 1.04   | 0      |
| GAIF01007312.1 | 5.16   | 0.73   | 7.32   | 4.6    | 2.83   | 1.69   |
| GAIF01007313.1 | 0.16   | 0.26   | 0      | 0.44   | 1.65   | 0.18   |
| GAIF01007314.1 | 0      | 0      | 0.03   | 0.03   | 0.16   | 0      |
| GAIF01007315.1 | 43.03  | 26.81  | 54.44  | 1.53   | 0      | 1.74   |
| GAIF01007316.1 | 1.04   | 0.31   | 0.26   | 8.5    | 34.25  | 0.29   |
| GAIF01007319.1 | 17.88  | 32.74  | 38.08  | 68.38  | 63.02  | 33.58  |
| GAIF01007320.1 | 0.59   | 1.28   | 0.09   | 0.78   | 2.22   | 0.18   |
| GAIF01007321.1 | 0.4    | 0.09   | 0      | 0.24   | 0.52   | 0.06   |
| GAIF01007324.1 | 0      | 0      | 0      | 0      | 0.25   | 0      |
| GAIF01007326.1 | 28.96  | 20.15  | 37.02  | 109.34 | 52.94  | 33.47  |
| GAIF01007327.1 | 5.57   | 13.14  | 5.51   | 22.94  | 24.72  | 3.46   |
| GAIF01007329.1 | 90.54  | 81.66  | 77.28  | 83.4   | 54.3   | 13.27  |
| GAIF01007330.1 | 4.37   | 0.22   | 1      | 26.63  | 208.45 | 7.72   |
| GAIF01007331.1 | 1.02   | 0.19   | 0.84   | 0      | 0.1    | 0      |
| GAIF01007332.1 | 0.83   | 0.95   | 0.34   | 1.56   | 0.73   | 0.07   |
| GAIF01007334.1 | 0.05   | 0.06   | 0      | 0      | 0      | 0      |
| GAIF01007338.1 | 54.06  | 16.19  | 7.57   | 120.52 | 177.15 | 57.66  |
| GAIF01007339.1 | 0      | 0      | 0      | 0      | 0.05   | 0      |
| GAIF01007341.1 | 441.48 | 343.32 | 437.78 | 12.17  | 7.29   | 5.42   |
| GAIF01007342.1 | 0.15   | 0      | 0      | 0.52   | 1.19   | 0      |
| GAIF01007343.1 | 40.16  | 16.27  | 4.48   | 26.52  | 31.6   | 39.85  |
| GAIF01007344.1 | 39.92  | 22.54  | 26.2   | 27.78  | 18.8   | 23.38  |

|                |         |         |         |         |         |        |
|----------------|---------|---------|---------|---------|---------|--------|
| GAIF01007345.1 | 0.24    | 0       | 0       | 0.14    | 0.43    | 0      |
| GAIF01007346.1 | 4.64    | 0       | 5.37    | 0.65    | 3.73    | 2.35   |
| GAIF01007347.1 | 2.61    | 0       | 0.08    | 0.51    | 1.63    | 0.43   |
| GAIF01007348.1 | 0.03    | 0       | 0.03    | 0.09    | 0.37    | 0.03   |
| GAIF01007349.1 | 5467.64 | 4625.38 | 6328.77 | 3094.41 | 2573.26 | 8011.3 |
| GAIF01007350.1 | 0       | 0.14    | 0.09    | 0       | 0       | 0.14   |
| GAIF01007351.1 | 0.56    | 0.24    | 0.67    | 0.13    | 0       | 0.18   |
| GAIF01007352.1 | 168.92  | 184.69  | 292.91  | 133.9   | 102.25  | 167.68 |
| GAIF01007353.1 | 0       | 0.1     | 0       | 0.67    | 3       | 0.21   |
| GAIF01007354.1 | 0.92    | 0.74    | 1.07    | 3.2     | 6.94    | 1.16   |
| GAIF01007355.1 | 0       | 0       | 0.16    | 0       | 0.21    | 0      |
| GAIF01007356.1 | 1.6     | 0.67    | 1.5     | 6.18    | 9.78    | 0      |
| GAIF01007357.1 | 0.29    | 0       | 0       | 0.29    | 7.12    | 0.26   |
| GAIF01007358.1 | 1.76    | 2.82    | 0.51    | 12.64   | 14.12   | 2.98   |
| GAIF01007360.1 | 7.35    | 6.64    | 7.28    | 13.44   | 4.5     | 9.63   |
| GAIF01007361.1 | 0       | 0       | 0       | 0.13    | 0.22    | 0      |
| GAIF01007362.1 | 7.57    | 5.94    | 5.63    | 19.77   | 10.16   | 4.03   |
| GAIF01007363.1 | 743.88  | 353.21  | 462.45  | 332     | 107.6   | 99.28  |
| GAIF01007364.1 | 0.47    | 0.51    | 0       | 1.8     | 2.4     | 0      |
| GAIF01007365.1 | 0       | 0       | 0       | 0       | 0.25    | 0      |
| GAIF01007366.1 | 0.12    | 0       | 0       | 0.27    | 0.42    | 0.51   |
| GAIF01007368.1 | 9.2     | 21.29   | 16.57   | 0.22    | 0.17    | 0.71   |
| GAIF01007369.1 | 13.99   | 24.02   | 33.07   | 11.83   | 12.9    | 23.13  |
| GAIF01007371.1 | 0       | 0       | 0       | 0.14    | 0       | 0.14   |
| GAIF01007372.1 | 0.51    | 0       | 0.45    | 0.67    | 2.14    | 0.54   |
| GAIF01007373.1 | 0.46    | 0       | 0       | 1.07    | 4.46    | 5.36   |
| GAIF01007375.1 | 0       | 0       | 0       | 0       | 1.84    | 0      |
| GAIF01007376.1 | 0       | 0       | 0       | 0.63    | 2.99    | 0      |
| GAIF01007377.1 | 0.99    | 0.56    | 0.99    | 0.84    | 0.67    | 0.18   |
| GAIF01007378.1 | 20.4    | 25.66   | 25.24   | 21.2    | 10.44   | 5.37   |
| GAIF01007380.1 | 0.04    | 0       | 0       | 0       | 0       | 0      |
| GAIF01007383.1 | 0       | 0.23    | 0       | 0.4     | 0.75    | 0      |
| GAIF01007384.1 | 0       | 0       | 0.15    | 0.03    | 0       | 0      |
| GAIF01007385.1 | 8.99    | 9.77    | 7.81    | 37.97   | 19.8    | 5.63   |
| GAIF01007386.1 | 0       | 0.06    | 0.06    | 0       | 0       | 0      |
| GAIF01007387.1 | 110.83  | 29.65   | 27.11   | 0.26    | 0.4     | 0.31   |
| GAIF01007388.1 | 0       | 0       | 0       | 0       | 0       | 0.11   |
| GAIF01007390.1 | 0       | 0       | 0       | 0       | 0.16    | 0      |
| GAIF01007391.1 | 0       | 0       | 0       | 0.88    | 0       | 0      |
| GAIF01007392.1 | 0.12    | 0       | 0       | 0.29    | 0.44    | 0      |
| GAIF01007393.1 | 0       | 0.13    | 0.13    | 0       | 0.29    | 0      |
| GAIF01007394.1 | 0.23    | 0.11    | 0       | 0.08    | 0.79    | 0      |
| GAIF01007395.1 | 23.43   | 35.12   | 22.01   | 23.81   | 31.91   | 3.14   |
| GAIF01007396.1 | 6.05    | 11.32   | 11.26   | 0.37    | 0       | 0.97   |



|                |         |         |        |         |         |         |
|----------------|---------|---------|--------|---------|---------|---------|
| GAIF01007397.1 | 17.99   | 13.41   | 12.52  | 44.46   | 36.14   | 10.32   |
| GAIF01007398.1 | 10.64   | 9.36    | 7.61   | 23.88   | 24.4    | 2.39    |
| GAIF01007400.1 | 3194.79 | 1391.53 | 681.43 | 1382.71 | 1163.21 | 2788.74 |
| GAIF01007401.1 | 60.32   | 69.99   | 64.96  | 100.91  | 118.19  | 114.63  |
| GAIF01007402.1 | 0.89    | 0.02    | 0.02   | 2.11    | 6.47    | 1.94    |
| GAIF01007404.1 | 69.01   | 20.78   | 2.49   | 8.87    | 17.72   | 0.73    |
| GAIF01007406.1 | 17.59   | 10.41   | 6.08   | 10.84   | 10.19   | 7.05    |
| GAIF01007408.1 | 0.17    | 0       | 0      | 0.39    | 0.5     | 0       |
| GAIF01007409.1 | 14.33   | 16.58   | 12.77  | 32.15   | 19.66   | 6.51    |
| GAIF01007410.1 | 3.66    | 2.72    | 3.28   | 0.45    | 0.12    | 0.37    |
| GAIF01007411.1 | 11.86   | 10.68   | 3.46   | 60.22   | 109.93  | 1.2     |
| GAIF01007412.1 | 3.8     | 1.69    | 1.53   | 1.58    | 1.9     | 2.09    |
| GAIF01007413.1 | 0.1     | 0.22    | 0.52   | 0.05    | 0.45    | 0.45    |
| GAIF01007414.1 | 3.39    | 2.66    | 2.79   | 6.55    | 8.94    | 2.28    |
| GAIF01007415.1 | 11.43   | 3.16    | 0      | 13.06   | 13.14   | 2.51    |
| GAIF01007416.1 | 0       | 0       | 0      | 0       | 0.01    | 0       |
| GAIF01007417.1 | 0.03    | 0       | 0      | 0       | 0.27    | 0       |
| GAIF01007418.1 | 0       | 0       | 0      | 0       | 0.05    | 0       |
| GAIF01007419.1 | 2.47    | 5.59    | 2.71   | 14.8    | 34.12   | 1.31    |
| GAIF01007420.1 | 0       | 0       | 0      | 0       | 0.22    | 0       |
| GAIF01007422.1 | 1.62    | 2.13    | 0.23   | 0.74    | 1.52    | 0.72    |
| GAIF01007423.1 | 0       | 0.29    | 0.22   | 0       | 0       | 0       |
| GAIF01007424.1 | 0       | 0       | 0      | 0.24    | 0.28    | 0       |
| GAIF01007426.1 | 16.1    | 18.94   | 14.87  | 38.72   | 35.28   | 9.38    |
| GAIF01007427.1 | 0       | 0       | 0.93   | 0       | 4.07    | 0       |
| GAIF01007428.1 | 0       | 0       | 0      | 0       | 0.59    | 0       |
| GAIF01007430.1 | 1.75    | 0.26    | 0      | 1.29    | 1.44    | 0.53    |
| GAIF01007431.1 | 0       | 0       | 0      | 1.17    | 3.27    | 0.22    |
| GAIF01007432.1 | 33.13   | 63.53   | 27.11  | 84.49   | 48.74   | 8.35    |
| GAIF01007433.1 | 0       | 0.05    | 0      | 0.35    | 1.25    | 0.52    |
| GAIF01007434.1 | 14.22   | 16.98   | 4.62   | 8.94    | 9.24    | 0.72    |
| GAIF01007435.1 | 3.21    | 0.98    | 0.29   | 0.39    | 0.16    | 0.69    |
| GAIF01007437.1 | 0       | 0       | 0      | 0.46    | 0.29    | 0       |
| GAIF01007438.1 | 2.25    | 1.35    | 2.22   | 4.61    | 2.21    | 1.1     |
| GAIF01007439.1 | 1.75    | 3.21    | 1.36   | 1.19    | 0.26    | 0.09    |
| GAIF01007441.1 | 0       | 0       | 0      | 0.24    | 1       | 2.51    |
| GAIF01007442.1 | 6.17    | 7.45    | 12.04  | 12.47   | 6.6     | 10.33   |
| GAIF01007443.1 | 0       | 0       | 0      | 0       | 0.13    | 0.12    |
| GAIF01007446.1 | 0       | 0.16    | 0.16   | 0.17    | 0       | 0.16    |
| GAIF01007448.1 | 0.19    | 0.2     | 0      | 0.22    | 0.67    | 0       |
| GAIF01007449.1 | 0       | 0       | 0      | 0.18    | 4.4     | 0.09    |
| GAIF01007450.1 | 0       | 0       | 0      | 0       | 0.05    | 0       |
| GAIF01007451.1 | 0       | 0.07    | 0.21   | 0.95    | 5.09    | 0       |
| GAIF01007452.1 | 48.69   | 6.22    | 14.32  | 29.4    | 5.62    | 25.44   |

|                |        |        |        |        |        |        |
|----------------|--------|--------|--------|--------|--------|--------|
| GAIF01007454.1 | 0.33   | 0      | 0      | 1.14   | 3.66   | 0.24   |
| GAIF01007456.1 | 1.67   | 1.62   | 1.95   | 5.99   | 10.53  | 1.32   |
| GAIF01007457.1 | 0      | 0      | 0      | 0      | 0.53   | 0      |
| GAIF01007458.1 | 1.49   | 0.19   | 0.26   | 3.81   | 14.77  | 21.29  |
| GAIF01007459.1 | 113.73 | 137.9  | 251.11 | 105.02 | 77.15  | 127.9  |
| GAIF01007461.1 | 0.11   | 0.12   | 0      | 0      | 0      | 0      |
| GAIF01007462.1 | 6.34   | 1.94   | 0.83   | 20.55  | 29.93  | 1.38   |
| GAIF01007463.1 | 0.31   | 0.16   | 0.16   | 0      | 0.23   | 0.16   |
| GAIF01007464.1 | 0.24   | 0      | 0      | 0.34   | 0.58   | 0.27   |
| GAIF01007465.1 | 13.47  | 14.96  | 20.66  | 0.5    | 0.26   | 0.08   |
| GAIF01007466.1 | 81.12  | 36.86  | 26.99  | 92.08  | 37.75  | 17.29  |
| GAIF01007467.1 | 37.6   | 46.35  | 54.82  | 1.03   | 0.47   | 0.22   |
| GAIF01007468.1 | 0      | 0      | 0      | 0      | 0.42   | 0      |
| GAIF01007469.1 | 0.13   | 0.07   | 0.14   | 0.13   | 0.03   | 0      |
| GAIF01007470.1 | 0      | 0      | 0      | 0      | 0.12   | 0      |
| GAIF01007471.1 | 6.54   | 5.31   | 4.96   | 13.94  | 15.91  | 12.03  |
| GAIF01007472.1 | 0      | 0      | 0.13   | 0      | 0.34   | 0      |
| GAIF01007473.1 | 0.31   | 0      | 0      | 0.59   | 0.16   | 0.34   |
| GAIF01007474.1 | 28.52  | 32.95  | 49.98  | 108.85 | 63.49  | 21     |
| GAIF01007475.1 | 0.74   | 0.4    | 0.65   | 1.09   | 1.19   | 0.25   |
| GAIF01007478.1 | 244.39 | 467.8  | 167.25 | 444.48 | 448.26 | 47.3   |
| GAIF01007479.1 | 5.44   | 3.34   | 1.61   | 6.29   | 6.38   | 5.25   |
| GAIF01007480.1 | 553.78 | 419.45 | 164.36 | 76.44  | 216.91 | 307.79 |
| GAIF01007482.1 | 0      | 0.05   | 0      | 0      | 0      | 0      |
| GAIF01007483.1 | 45.11  | 72.65  | 45.99  | 84.37  | 96.53  | 91.12  |
| GAIF01007484.1 | 52.92  | 44.16  | 48.88  | 95.19  | 47.79  | 120.15 |
| GAIF01007485.1 | 5.07   | 5.65   | 5.61   | 6.09   | 5.72   | 1.81   |
| GAIF01007487.1 | 103.79 | 75.1   | 169.76 | 270.84 | 111.97 | 254.95 |
| GAIF01007489.1 | 5.77   | 10.53  | 4.95   | 2.66   | 0.89   | 0.16   |
| GAIF01007490.1 | 0.9    | 0.74   | 0      | 0.69   | 1.81   | 0      |
| GAIF01007491.1 | 22.86  | 23.96  | 23.15  | 55.9   | 39.27  | 12.29  |
| GAIF01007492.1 | 17.32  | 27.1   | 4.78   | 14.22  | 64.91  | 4.32   |
| GAIF01007493.1 | 0.13   | 0      | 0      | 0.12   | 0      | 0      |
| GAIF01007495.1 | 0.08   | 0.04   | 0      | 0      | 0      | 0      |
| GAIF01007496.1 | 1.23   | 3.24   | 1.35   | 1.41   | 1.93   | 0.9    |
| GAIF01007497.1 | 0.26   | 0      | 0.09   | 0      | 0.08   | 0.5    |
| GAIF01007498.1 | 31.48  | 20.82  | 13.43  | 62.44  | 44.6   | 7.72   |
| GAIF01007501.1 | 0      | 0      | 0      | 0.05   | 0      | 0      |
| GAIF01007503.1 | 0.42   | 0      | 0.21   | 0.77   | 0.52   | 0.52   |
| GAIF01007505.1 | 1.22   | 1.2    | 1.37   | 6.29   | 13.18  | 0.75   |
| GAIF01007506.1 | 67.06  | 93.64  | 59.13  | 165.44 | 185.63 | 20.77  |
| GAIF01007508.1 | 43.44  | 61.45  | 109.71 | 171.13 | 182.76 | 33.43  |
| GAIF01007509.1 | 5.02   | 4.26   | 4.65   | 2.55   | 2.26   | 0.17   |
| GAIF01007510.1 | 12.19  | 9.19   | 8.21   | 18.81  | 10.98  | 4.59   |

|                |        |        |        |       |       |        |
|----------------|--------|--------|--------|-------|-------|--------|
| GAIF01007511.1 | 5.34   | 10.42  | 10.57  | 9.76  | 0     | 1.66   |
| GAIF01007512.1 | 0      | 0      | 0      | 0.1   | 1.08  | 0.36   |
| GAIF01007515.1 | 0      | 1.13   | 0      | 0.01  | 29.75 | 3.83   |
| GAIF01007518.1 | 18.67  | 12.59  | 3.82   | 11.38 | 20.8  | 0      |
| GAIF01007519.1 | 1.26   | 1.55   | 1.12   | 0.51  | 0.4   | 1.05   |
| GAIF01007520.1 | 8.83   | 3.58   | 5.02   | 29.62 | 20.08 | 13.71  |
| GAIF01007521.1 | 0.33   | 0      | 0.02   | 0.87  | 0.62  | 0.17   |
| GAIF01007522.1 | 0.13   | 0.07   | 0.07   | 0.08  | 0.08  | 0.15   |
| GAIF01007523.1 | 0.34   | 0.36   | 0.22   | 2.57  | 7.66  | 0.07   |
| GAIF01007524.1 | 0.51   | 0.5    | 0.1    | 0.21  | 0     | 0      |
| GAIF01007527.1 | 23.23  | 30.11  | 71.33  | 0     | 14.54 | 21.97  |
| GAIF01007528.1 | 0.22   | 0.18   | 0      | 1.11  | 2.56  | 0.12   |
| GAIF01007529.1 | 0      | 0      | 0      | 0.07  | 0.08  | 0      |
| GAIF01007530.1 | 0.66   | 1.12   | 0.18   | 0.19  | 0     | 0.04   |
| GAIF01007531.1 | 0.25   | 0.05   | 0.14   | 1.08  | 0.15  | 0.19   |
| GAIF01007534.1 | 0      | 0.05   | 0.05   | 0.16  | 0.27  | 0.05   |
| GAIF01007536.1 | 0      | 0.65   | 0      | 0     | 0     | 0.27   |
| GAIF01007537.1 | 0      | 0.03   | 0      | 0     | 0     | 0      |
| GAIF01007538.1 | 32.21  | 33.29  | 32.65  | 43.61 | 17.45 | 13.43  |
| GAIF01007539.1 | 5.63   | 9.94   | 6.18   | 38.9  | 40.17 | 3.75   |
| GAIF01007540.1 | 0.03   | 0.03   | 0      | 0     | 0     | 0      |
| GAIF01007542.1 | 195.16 | 135.63 | 292.84 | 84.22 | 24.96 | 173.62 |
| GAIF01007543.1 | 0      | 0.16   | 0.16   | 0     | 0     | 0      |
| GAIF01007544.1 | 0.19   | 0.1    | 0.16   | 0.6   | 3.41  | 0.21   |
| GAIF01007545.1 | 75.2   | 31.53  | 18.63  | 26.04 | 19.43 | 1.64   |
| GAIF01007546.1 | 0.33   | 0.24   | 0.24   | 0     | 0.26  | 0      |
| GAIF01007547.1 | 3.14   | 5.42   | 2.3    | 3.65  | 2.15  | 0.88   |
| GAIF01007548.1 | 13.93  | 12.42  | 2.42   | 7.55  | 10.95 | 0      |
| GAIF01007549.1 | 10.31  | 8.76   | 9.25   | 53.32 | 23.57 | 4.89   |
| GAIF01007550.1 | 0      | 0      | 0.47   | 0     | 0.54  | 0.25   |
| GAIF01007551.1 | 0.48   | 0.15   | 0.15   | 2.82  | 4.91  | 0.2    |
| GAIF01007552.1 | 2.48   | 3.23   | 4.1    | 9.53  | 7.33  | 3.44   |
| GAIF01007553.1 | 0.57   | 0      | 0      | 0     | 0     | 0      |
| GAIF01007554.1 | 0.54   | 0.07   | 0.15   | 1.64  | 7.04  | 3.11   |
| GAIF01007556.1 | 0      | 0      | 0      | 0.28  | 0     | 0      |
| GAIF01007558.1 | 0      | 0      | 0.1    | 0     | 0.05  | 0.19   |
| GAIF01007561.1 | 0      | 0.17   | 0.26   | 0.28  | 1.15  | 0.09   |
| GAIF01007562.1 | 3.69   | 1.05   | 0.5    | 14.23 | 17.94 | 1.59   |
| GAIF01007563.1 | 0.37   | 0.2    | 0.2    | 0.53  | 0     | 0.1    |
| GAIF01007564.1 | 0      | 0      | 0      | 0.21  | 0.64  | 0      |
| GAIF01007565.1 | 9.35   | 24.48  | 21.54  | 30.67 | 32    | 3.66   |
| GAIF01007566.1 | 4.19   | 3.52   | 0.91   | 2.48  | 1.68  | 0      |
| GAIF01007567.1 | 3.97   | 6.18   | 1.16   | 34.54 | 55.36 | 0.87   |
| GAIF01007569.1 | 0.68   | 0      | 0.13   | 1.16  | 7.34  | 2.02   |

|                |         |         |        |         |         |        |
|----------------|---------|---------|--------|---------|---------|--------|
| GAIF01007570.1 | 0.67    | 0       | 0      | 0.78    | 3.37    | 0      |
| GAIF01007573.1 | 0       | 0.28    | 0      | 0.5     | 0.9     | 0.12   |
| GAIF01007574.1 | 0       | 1.68    | 2.51   | 0       | 0       | 0.5    |
| GAIF01007575.1 | 26.22   | 19.74   | 6.64   | 0       | 0       | 0      |
| GAIF01007577.1 | 1837.76 | 1829.31 | 508.41 | 1798.84 | 3168.28 | 534.43 |
| GAIF01007578.1 | 37.09   | 18.36   | 18.6   | 63.54   | 80.61   | 66.92  |
| GAIF01007580.1 | 0       | 0       | 0.4    | 0       | 0       | 0      |
| GAIF01007582.1 | 1.32    | 2.89    | 5.22   | 2.26    | 2.3     | 8.23   |
| GAIF01007583.1 | 129.33  | 84.01   | 47.35  | 241.32  | 453.14  | 47.79  |
| GAIF01007584.1 | 0       | 0       | 0      | 0       | 0.29    | 0      |
| GAIF01007585.1 | 13.58   | 11.03   | 16.29  | 44.83   | 24.74   | 19.2   |
| GAIF01007586.1 | 12.67   | 16.42   | 18.06  | 20.81   | 10.05   | 13.37  |
| GAIF01007587.1 | 1.73    | 0.97    | 0.53   | 6.57    | 7.38    | 0.67   |
| GAIF01007589.1 | 0.53    | 0.32    | 0.38   | 2.84    | 24.31   | 40.42  |
| GAIF01007591.1 | 0.41    | 0.26    | 0      | 5.84    | 29.24   | 0.13   |
| GAIF01007592.1 | 4.2     | 5.68    | 4.61   | 4.57    | 6.75    | 0.94   |
| GAIF01007593.1 | 0       | 0       | 0      | 0.46    | 0.35    | 0      |
| GAIF01007594.1 | 0       | 0       | 0      | 0       | 0.07    | 0      |
| GAIF01007595.1 | 0.1     | 0.75    | 0.16   | 0       | 0       | 0      |
| GAIF01007596.1 | 0       | 0       | 0.04   | 0.05    | 0       | 0.09   |
| GAIF01007598.1 | 0.59    | 0       | 0      | 0       | 0       | 0      |
| GAIF01007599.1 | 0       | 0.51    | 0      | 0.22    | 0.11    | 0      |
| GAIF01007600.1 | 0.16    | 0       | 0      | 0.16    | 1.77    | 0      |
| GAIF01007601.1 | 1.96    | 0.45    | 0.06   | 12.78   | 32.64   | 0.51   |
| GAIF01007602.1 | 0.08    | 0.13    | 0.09   | 0.19    | 0.84    | 0.02   |
| GAIF01007605.1 | 0.24    | 0       | 0      | 0.56    | 3.21    | 0.09   |
| GAIF01007606.1 | 32.7    | 30.11   | 30.23  | 30.63   | 16.08   | 4.61   |
| GAIF01007607.1 | 0.14    | 0.22    | 0.15   | 0.16    | 0       | 0      |
| GAIF01007609.1 | 0.99    | 0.64    | 0      | 15.62   | 27.41   | 0      |
| GAIF01007610.1 | 37.67   | 25.79   | 36.18  | 66.69   | 36.18   | 26.62  |
| GAIF01007611.1 | 0       | 0       | 0.17   | 0       | 0.16    | 0      |
| GAIF01007613.1 | 0       | 0       | 0.12   | 0.06    | 0.57    | 0      |
| GAIF01007614.1 | 0       | 0       | 0      | 0       | 0.01    | 0      |
| GAIF01007615.1 | 0       | 0.16    | 0      | 0       | 0       | 0      |
| GAIF01007616.1 | 0.54    | 0.2     | 0      | 0.6     | 0.58    | 0      |
| GAIF01007617.1 | 0       | 0.24    | 0      | 0       | 0.41    | 0.08   |
| GAIF01007618.1 | 1.65    | 0.04    | 0.08   | 0.57    | 2.08    | 0.21   |
| GAIF01007619.1 | 2.7     | 0.31    | 0      | 5.03    | 9.5     | 1.06   |
| GAIF01007620.1 | 0.06    | 0.06    | 0.03   | 0       | 0.14    | 0      |
| GAIF01007621.1 | 0       | 0.01    | 0.04   | 0.03    | 0.08    | 0.01   |
| GAIF01007623.1 | 2.78    | 4.26    | 2.69   | 3.68    | 4.8     | 1.16   |
| GAIF01007626.1 | 14.07   | 7.98    | 10.99  | 45.67   | 95.63   | 6.65   |
| GAIF01007627.1 | 0       | 0       | 0      | 0       | 0.71    | 0      |
| GAIF01007628.1 | 11.14   | 6.91    | 9.6    | 1.74    | 0.58    | 2.71   |

|                |        |        |        |        |        |        |
|----------------|--------|--------|--------|--------|--------|--------|
| GAIF01007629.1 | 0      | 0      | 0      | 0.44   | 0.92   | 0      |
| GAIF01007630.1 | 1.2    | 0.36   | 0      | 4.8    | 4.98   | 0.12   |
| GAIF01007632.1 | 9.09   | 13.14  | 12.06  | 23.59  | 28.54  | 3.86   |
| GAIF01007633.1 | 54.89  | 10.16  | 39.75  | 60.35  | 25.99  | 20.28  |
| GAIF01007634.1 | 2.84   | 1.22   | 0.15   | 0      | 0      | 0      |
| GAIF01007635.1 | 0      | 0      | 0      | 0.11   | 0.75   | 0      |
| GAIF01007637.1 | 0      | 0      | 0      | 0      | 0.25   | 0      |
| GAIF01007638.1 | 0      | 0      | 0      | 0      | 1.54   | 0      |
| GAIF01007640.1 | 49.63  | 21.29  | 2.99   | 20.38  | 29.35  | 0.7    |
| GAIF01007641.1 | 0.29   | 0.07   | 0      | 0.29   | 0.98   | 0      |
| GAIF01007642.1 | 5.55   | 4.38   | 0.7    | 12.13  | 17.76  | 9.84   |
| GAIF01007643.1 | 0.12   | 0.18   | 0.11   | 0.18   | 0.82   | 0      |
| GAIF01007644.1 | 0.06   | 0.33   | 0.41   | 0      | 0      | 0.14   |
| GAIF01007645.1 | 0      | 0      | 0.11   | 0.12   | 0      | 0      |
| GAIF01007646.1 | 0.13   | 0.07   | 0.07   | 0.07   | 0      | 0      |
| GAIF01007647.1 | 0      | 0      | 0.15   | 0      | 0      | 0      |
| GAIF01007648.1 | 12.24  | 18.63  | 18.5   | 21.39  | 13.77  | 6.98   |
| GAIF01007650.1 | 0.06   | 0.14   | 0      | 0.14   | 0      | 0      |
| GAIF01007653.1 | 0.37   | 0.2    | 0      | 1.66   | 6.85   | 0.59   |
| GAIF01007654.1 | 0.09   | 0      | 0      | 0.33   | 1.74   | 0.21   |
| GAIF01007656.1 | 0.76   | 0      | 0      | 2.2    | 8.47   | 0      |
| GAIF01007657.1 | 0      | 0      | 0      | 0      | 0      | 0.15   |
| GAIF01007658.1 | 0.03   | 0      | 0      | 0      | 0      | 0      |
| GAIF01007659.1 | 0      | 0.08   | 0      | 0      | 0      | 0      |
| GAIF01007660.1 | 0      | 0      | 0      | 0      | 0.07   | 0      |
| GAIF01007661.1 | 0.15   | 0.55   | 0.67   | 0.53   | 0.43   | 0.17   |
| GAIF01007662.1 | 505.11 | 208.19 | 143.04 | 518.47 | 271.8  | 550.46 |
| GAIF01007663.1 | 106.72 | 55.84  | 70.12  | 47.71  | 67.44  | 69.34  |
| GAIF01007664.1 | 0.13   | 0.07   | 0      | 0.08   | 0.64   | 0      |
| GAIF01007666.1 | 8.02   | 2.63   | 1.11   | 0      | 0      | 0      |
| GAIF01007667.1 | 0      | 0      | 0      | 0.65   | 2.02   | 0      |
| GAIF01007668.1 | 0.02   | 0      | 0      | 0.17   | 0      | 0      |
| GAIF01007670.1 | 47.56  | 54.56  | 63.67  | 81.34  | 55.29  | 45.53  |
| GAIF01007671.1 | 5.48   | 1.02   | 0.26   | 12.94  | 24.04  | 4.4    |
| GAIF01007672.1 | 10.09  | 9.57   | 3.16   | 9.83   | 10.96  | 8.73   |
| GAIF01007673.1 | 0      | 0      | 0      | 0.12   | 0.48   | 0      |
| GAIF01007674.1 | 0      | 0      | 0      | 0.47   | 3.08   | 0      |
| GAIF01007675.1 | 99.84  | 142.07 | 132.33 | 213.22 | 228.13 | 307.43 |
| GAIF01007676.1 | 0.01   | 0.01   | 0      | 0.02   | 0.15   | 0      |
| GAIF01007677.1 | 11.4   | 5.46   | 12.09  | 0.45   | 0.46   | 1.06   |
| GAIF01007679.1 | 8.69   | 2.04   | 4      | 8.32   | 4.66   | 5.31   |
| GAIF01007680.1 | 332.53 | 197.05 | 174.08 | 86.83  | 72.16  | 22.06  |
| GAIF01007681.1 | 0.34   | 0.09   | 0      | 0.15   | 1.76   | 0.02   |
| GAIF01007682.1 | 23.18  | 0      | 3.06   | 11.92  | 1.59   | 19.73  |

|                |        |        |        |        |       |       |
|----------------|--------|--------|--------|--------|-------|-------|
| GAIF01007683.1 | 3.47   | 3.42   | 2.26   | 14.1   | 16.31 | 1.32  |
| GAIF01007684.1 | 67.49  | 83.66  | 69.86  | 153.19 | 91.7  | 69.66 |
| GAIF01007685.1 | 46.1   | 59.57  | 44.73  | 65.42  | 33.73 | 14.81 |
| GAIF01007687.1 | 55.21  | 74.41  | 49.51  | 51.7   | 36.82 | 11.31 |
| GAIF01007688.1 | 0      | 0      | 0      | 0.32   | 2.03  | 0.17  |
| GAIF01007689.1 | 30.28  | 26.45  | 21.31  | 7.99   | 9.02  | 7.35  |
| GAIF01007690.1 | 1.23   | 0      | 0.83   | 0.93   | 2.47  | 0.23  |
| GAIF01007692.1 | 4.23   | 5.04   | 4.06   | 2.99   | 2.01  | 0.85  |
| GAIF01007693.1 | 1.32   | 0.45   | 0.08   | 4.9    | 8.08  | 14.42 |
| GAIF01007695.1 | 0      | 0      | 0      | 0.09   | 0.45  | 0     |
| GAIF01007696.1 | 1.18   | 3.08   | 0.99   | 1.44   | 1.08  | 0.08  |
| GAIF01007697.1 | 0      | 0.37   | 0      | 0.39   | 1.63  | 0     |
| GAIF01007698.1 | 0      | 0      | 0      | 0      | 0.28  | 0     |
| GAIF01007700.1 | 0      | 0      | 0      | 0      | 1.31  | 0     |
| GAIF01007701.1 | 13.19  | 11.09  | 9.18   | 22.95  | 20.41 | 10.97 |
| GAIF01007703.1 | 61.66  | 64.91  | 96.62  | 103.44 | 47.69 | 76.45 |
| GAIF01007704.1 | 0      | 0      | 0      | 0.27   | 1.03  | 0     |
| GAIF01007706.1 | 1.37   | 0.64   | 2.1    | 0.2    | 0     | 0.51  |
| GAIF01007707.1 | 0.92   | 0.27   | 1.37   | 0.58   | 2.31  | 1.2   |
| GAIF01007709.1 | 2.87   | 7.05   | 3.38   | 8.89   | 10.34 | 0.39  |
| GAIF01007712.1 | 0.04   | 0      | 0      | 0      | 0.09  | 0     |
| GAIF01007713.1 | 0      | 6.32   | 9.44   | 0      | 0     | 0.38  |
| GAIF01007714.1 | 0.58   | 0      | 0      | 0      | 0.84  | 0     |
| GAIF01007715.1 | 19.05  | 10.41  | 11.35  | 1.27   | 4.5   | 1.2   |
| GAIF01007716.1 | 0      | 0      | 0      | 0.21   | 0.45  | 0.1   |
| GAIF01007718.1 | 0      | 0.21   | 0.32   | 0      | 0     | 0     |
| GAIF01007719.1 | 0.96   | 0      | 0      | 3.34   | 9.68  | 1.09  |
| GAIF01007720.1 | 0      | 0      | 0      | 0.01   | 0     | 0     |
| GAIF01007721.1 | 0.06   | 0.09   | 0.18   | 0.06   | 0.2   | 0.04  |
| GAIF01007722.1 | 0.02   | 0      | 0      | 0      | 0.02  | 0     |
| GAIF01007725.1 | 2.17   | 2.36   | 1.39   | 8.17   | 6.95  | 0.6   |
| GAIF01007726.1 | 0.87   | 0.54   | 0      | 7.92   | 21.05 | 0     |
| GAIF01007727.1 | 0.19   | 0.05   | 0.05   | 0.03   | 0     | 0.03  |
| GAIF01007728.1 | 27.46  | 19.84  | 11.3   | 18.33  | 16.95 | 6.76  |
| GAIF01007729.1 | 0      | 0      | 0.06   | 0.06   | 0     | 0.06  |
| GAIF01007731.1 | 0.79   | 0.34   | 0.78   | 0.28   | 0     | 0.26  |
| GAIF01007732.1 | 1.01   | 0      | 0      | 6.86   | 29.66 | 0.56  |
| GAIF01007734.1 | 13.74  | 6.96   | 10.21  | 11.48  | 11.5  | 46.84 |
| GAIF01007735.1 | 0.02   | 0      | 0.08   | 0.14   | 0.32  | 0.03  |
| GAIF01007736.1 | 0.03   | 3.31   | 1.19   | 0.16   | 0     | 0.37  |
| GAIF01007738.1 | 0.77   | 0      | 0      | 0.1    | 0     | 0     |
| GAIF01007739.1 | 2.74   | 2.75   | 3.36   | 6.12   | 6.59  | 1.28  |
| GAIF01007740.1 | 0      | 0.28   | 0.14   | 0.88   | 0.76  | 0.84  |
| GAIF01007742.1 | 200.04 | 168.78 | 124.22 | 42.05  | 49.4  | 54.39 |

|                |        |        |        |        |        |        |
|----------------|--------|--------|--------|--------|--------|--------|
| GAIF01007743.1 | 4.78   | 7.79   | 3.03   | 5.29   | 4.22   | 0.74   |
| GAIF01007744.1 | 104.39 | 47.18  | 55.03  | 43.99  | 33.71  | 52.39  |
| GAIF01007746.1 | 0      | 0      | 0      | 0      | 0.31   | 0      |
| GAIF01007747.1 | 0.37   | 0      | 0.31   | 1.78   | 11.32  | 0.46   |
| GAIF01007750.1 | 0      | 0.15   | 0      | 0      | 0      | 0      |
| GAIF01007751.1 | 0      | 0      | 0      | 0      | 0.05   | 0      |
| GAIF01007752.1 | 0.1    | 0.24   | 0.04   | 0      | 0.04   | 0      |
| GAIF01007754.1 | 3.66   | 4.42   | 0.17   | 6.02   | 17.94  | 0      |
| GAIF01007755.1 | 18.84  | 24.68  | 35.67  | 74.04  | 63.7   | 18.31  |
| GAIF01007756.1 | 0      | 0      | 0.23   | 0.73   | 0      | 0      |
| GAIF01007757.1 | 0      | 0.07   | 0      | 0      | 0.66   | 0      |
| GAIF01007758.1 | 37.9   | 34.8   | 44.24  | 72.21  | 61.44  | 115.18 |
| GAIF01007759.1 | 3.62   | 4.7    | 1.66   | 5.14   | 3.99   | 0.11   |
| GAIF01007763.1 | 0      | 0      | 0      | 0.65   | 3.41   | 0      |
| GAIF01007764.1 | 5.22   | 3.45   | 2.22   | 5.85   | 2.97   | 0.66   |
| GAIF01007766.1 | 189.77 | 262.28 | 360.86 | 758.44 | 461.28 | 278.65 |
| GAIF01007767.1 | 0.04   | 0      | 0.05   | 0      | 0      | 0      |
| GAIF01007768.1 | 0.13   | 0      | 0.28   | 0.29   | 0      | 0      |
| GAIF01007769.1 | 0.03   | 0.07   | 0      | 0.03   | 0.04   | 0      |
| GAIF01007770.1 | 0.54   | 0.18   | 0.23   | 0.59   | 0.8    | 0.34   |
| GAIF01007771.1 | 0      | 0      | 0      | 0      | 0.05   | 0      |
| GAIF01007772.1 | 0      | 0      | 0      | 0.07   | 0.08   | 0      |
| GAIF01007773.1 | 0.06   | 0.06   | 0.06   | 0.45   | 2.45   | 0.15   |
| GAIF01007774.1 | 2.09   | 0.82   | 0.42   | 6.9    | 18.48  | 5.64   |
| GAIF01007775.1 | 0      | 0      | 0.19   | 0      | 0      | 0      |
| GAIF01007776.1 | 26.22  | 0      | 10.49  | 0      | 37.38  | 0      |
| GAIF01007777.1 | 5.22   | 5.6    | 3.44   | 4.65   | 4.51   | 0.17   |
| GAIF01007779.1 | 0      | 0      | 2.08   | 4.35   | 0.08   | 0      |
| GAIF01007780.1 | 0      | 0      | 0      | 0      | 0.09   | 0      |
| GAIF01007781.1 | 34.65  | 38.01  | 39.8   | 20.18  | 15.18  | 5.19   |
| GAIF01007782.1 | 330.23 | 609.79 | 685.54 | 261.26 | 231.05 | 82.8   |
| GAIF01007783.1 | 0      | 0      | 0      | 0      | 0.17   | 0      |
| GAIF01007784.1 | 25.48  | 18.58  | 13.72  | 75.03  | 108.73 | 8.03   |
| GAIF01007785.1 | 0      | 0.09   | 1.03   | 0      | 0.1    | 1.13   |
| GAIF01007787.1 | 0      | 2.65   | 14.79  | 12.99  | 0      | 11.93  |
| GAIF01007788.1 | 15.87  | 5.61   | 3.22   | 4.37   | 9.36   | 1.9    |
| GAIF01007789.1 | 0      | 0.13   | 0      | 0.08   | 0      | 0      |
| GAIF01007790.1 | 0.01   | 0      | 0      | 0      | 0      | 0.05   |
| GAIF01007791.1 | 0.18   | 0.1    | 0      | 0.62   | 1.17   | 0      |
| GAIF01007792.1 | 1.05   | 0.32   | 0      | 0.34   | 0      | 0      |
| GAIF01007794.1 | 0.52   | 0.28   | 0      | 0.3    | 2.04   | 0.57   |
| GAIF01007796.1 | 4.84   | 6.93   | 5.93   | 1.12   | 0.06   | 0.11   |
| GAIF01007797.1 | 53.75  | 95.69  | 99.8   | 144.21 | 133.05 | 20.91  |
| GAIF01007798.1 | 5.97   | 3.01   | 1.42   | 7.79   | 16.43  | 3.05   |

|                |        |         |         |         |        |         |
|----------------|--------|---------|---------|---------|--------|---------|
| GAIF01007799.1 | 0.91   | 0       | 0       | 0       | 0.13   | 0.13    |
| GAIF01007800.1 | 10.8   | 9.56    | 8.36    | 43.33   | 50.94  | 9.6     |
| GAIF01007801.1 | 0      | 0       | 0       | 0.3     | 1.87   | 0       |
| GAIF01007802.1 | 1777.7 | 1377.29 | 1715.53 | 1133.27 | 784.23 | 1933.12 |
| GAIF01007804.1 | 0      | 0.12    | 0       | 0.26    | 0.54   | 0       |
| GAIF01007805.1 | 0      | 0.07    | 0       | 0.07    | 0.07   | 0       |
| GAIF01007809.1 | 0.86   | 0.23    | 0       | 4.47    | 1.03   | 0.47    |
| GAIF01007811.1 | 20.65  | 16.61   | 17.77   | 26.68   | 23.13  | 8.67    |
| GAIF01007812.1 | 0      | 0       | 0       | 0       | 0.04   | 0       |
| GAIF01007813.1 | 215.14 | 163.34  | 85.23   | 122.79  | 89.21  | 27.46   |
| GAIF01007815.1 | 0.03   | 0       | 0       | 0.04    | 0.53   | 0.08    |
| GAIF01007816.1 | 0.12   | 1.21    | 0.32    | 0.23    | 0      | 0.27    |
| GAIF01007817.1 | 52.45  | 0       | 0       | 0       | 0      | 0       |
| GAIF01007819.1 | 2.34   | 0.27    | 0       | 4.62    | 11.47  | 0.97    |
| GAIF01007820.1 | 1.78   | 1.22    | 0.72    | 3.21    | 3.71   | 1.63    |
| GAIF01007821.1 | 0.1    | 0.04    | 0       | 0.04    | 0.08   | 0.02    |
| GAIF01007822.1 | 0      | 0.26    | 0.33    | 0       | 0      | 0.07    |
| GAIF01007823.1 | 0      | 0       | 0       | 0.1     | 0.1    | 0       |
| GAIF01007825.1 | 8.4    | 15.51   | 5.55    | 46.02   | 30.53  | 2.45    |
| GAIF01007826.1 | 3.98   | 4.72    | 3.72    | 2.65    | 1.24   | 1.62    |
| GAIF01007827.1 | 0      | 0.08    | 0       | 0.08    | 0.83   | 0       |
| GAIF01007828.1 | 0      | 0.13    | 0.2     | 0.49    | 1.64   | 0.07    |
| GAIF01007829.1 | 3.61   | 0.89    | 0.43    | 9.15    | 21.39  | 8.65    |
| GAIF01007831.1 | 1.18   | 1.86    | 0.08    | 5.18    | 16.85  | 0.12    |
| GAIF01007832.1 | 1.78   | 0.24    | 0       | 2.19    | 6.15   | 2.33    |
| GAIF01007834.1 | 0      | 0       | 0       | 0.06    | 0.04   | 0       |
| GAIF01007836.1 | 0      | 0       | 0       | 0.07    | 0.07   | 0       |
| GAIF01007837.1 | 0      | 0.4     | 0.67    | 0.42    | 0.15   | 0       |
| GAIF01007838.1 | 0.13   | 0.1     | 0.29    | 0.54    | 0.22   | 0       |
| GAIF01007840.1 | 4.77   | 3.15    | 3.49    | 10.91   | 4.35   | 13.39   |
| GAIF01007841.1 | 14.9   | 7.56    | 10.31   | 19.52   | 27.03  | 94.72   |
| GAIF01007842.1 | 0      | 0       | 0       | 0       | 0.02   | 0       |
| GAIF01007843.1 | 2.58   | 0.92    | 0.31    | 6.98    | 19.12  | 5.57    |
| GAIF01007846.1 | 7.77   | 7.42    | 8.36    | 32.13   | 37.3   | 4.81    |
| GAIF01007847.1 | 3.63   | 1.63    | 1.09    | 14.58   | 26.03  | 0.42    |
| GAIF01007848.1 | 0.48   | 0.22    | 0.07    | 9.72    | 23.49  | 0.23    |
| GAIF01007849.1 | 0      | 0       | 0       | 0.2     | 0.46   | 0       |
| GAIF01007850.1 | 1.7    | 0.84    | 0.17    | 0.64    | 0.46   | 0       |
| GAIF01007851.1 | 0.48   | 0       | 0       | 2.14    | 8.51   | 0       |
| GAIF01007853.1 | 0.28   | 0.1     | 0.42    | 0.23    | 0.34   | 0       |
| GAIF01007854.1 | 0.22   | 0.08    | 0       | 0.17    | 0      | 0.16    |
| GAIF01007855.1 | 11.26  | 6.13    | 3.56    | 17.44   | 25.15  | 7.42    |
| GAIF01007857.1 | 35.53  | 37.65   | 38.08   | 40.13   | 31.28  | 17.39   |
| GAIF01007858.1 | 0      | 0       | 0       | 0       | 0.09   | 0       |



|                |        |        |        |        |        |        |
|----------------|--------|--------|--------|--------|--------|--------|
| GAIF01007860.1 | 0      | 0.04   | 0.19   | 0      | 0.01   | 0.02   |
| GAIF01007861.1 | 0      | 0.21   | 0      | 0      | 0      | 0      |
| GAIF01007862.1 | 0      | 0.18   | 0      | 0      | 0      | 0      |
| GAIF01007863.1 | 0      | 0      | 0      | 0.39   | 0.2    | 0      |
| GAIF01007864.1 | 0      | 0      | 0      | 0      | 0.5    | 0      |
| GAIF01007865.1 | 3.13   | 0.38   | 0      | 1.62   | 3      | 1.78   |
| GAIF01007867.1 | 12.92  | 12.77  | 22.48  | 22.79  | 11.3   | 17.76  |
| GAIF01007869.1 | 0      | 0      | 0      | 0      | 0      | 0.21   |
| GAIF01007871.1 | 0      | 0      | 0      | 0      | 0.09   | 0      |
| GAIF01007873.1 | 46.89  | 39.01  | 22.57  | 75.67  | 76.94  | 45.6   |
| GAIF01007874.1 | 0      | 0.32   | 0.34   | 2.9    | 15.95  | 0.55   |
| GAIF01007875.1 | 1.22   | 0.83   | 0.34   | 5.21   | 12.64  | 2.03   |
| GAIF01007876.1 | 20.52  | 12.27  | 3.9    | 83.57  | 96.8   | 4.25   |
| GAIF01007877.1 | 0      | 0.08   | 0.16   | 0.08   | 0.08   | 0      |
| GAIF01007878.1 | 0      | 0      | 0      | 0.26   | 0.55   | 0      |
| GAIF01007879.1 | 1.45   | 0.07   | 0.01   | 0.2    | 1.01   | 0.09   |
| GAIF01007881.1 | 6.61   | 3.33   | 0      | 8.67   | 5.87   | 0      |
| GAIF01007882.1 | 0      | 0      | 0      | 0      | 0.85   | 0      |
| GAIF01007883.1 | 0      | 0      | 0      | 0.14   | 0.09   | 0      |
| GAIF01007885.1 | 0      | 0      | 0.05   | 0      | 0.06   | 0.05   |
| GAIF01007886.1 | 0.32   | 0.34   | 0      | 0.61   | 1.26   | 0      |
| GAIF01007888.1 | 0.13   | 0      | 0      | 1.24   | 1.18   | 0.63   |
| GAIF01007889.1 | 114.05 | 294.15 | 928.13 | 71.14  | 34.58  | 104.21 |
| GAIF01007890.1 | 0.84   | 0.36   | 0.12   | 2.49   | 14.77  | 0      |
| GAIF01007892.1 | 43.89  | 77.29  | 61.05  | 125.97 | 153.52 | 20.8   |
| GAIF01007893.1 | 0.14   | 0      | 0      | 0.16   | 0      | 0      |
| GAIF01007894.1 | 0.03   | 0.03   | 0      | 0.41   | 0      | 0      |
| GAIF01007895.1 | 4.56   | 2      | 0.32   | 16.33  | 34.78  | 30.16  |
| GAIF01007896.1 | 1.25   | 1.36   | 5.32   | 1.04   | 1.72   | 3.77   |
| GAIF01007897.1 | 1.66   | 0.21   | 0.31   | 1.74   | 1.23   | 0.31   |
| GAIF01007898.1 | 0.76   | 1.02   | 0.37   | 4.93   | 13.73  | 0.05   |
| GAIF01007899.1 | 30.96  | 38.58  | 8.36   | 165.86 | 100.6  | 3.53   |
| GAIF01007900.1 | 0.61   | 0.91   | 0.07   | 2.54   | 10.84  | 0.04   |
| GAIF01007901.1 | 0.06   | 0      | 0      | 0.07   | 0.07   | 0      |
| GAIF01007903.1 | 0      | 0      | 0.04   | 0      | 0      | 0      |
| GAIF01007904.1 | 0      | 0.17   | 1.05   | 0      | 0      | 0.18   |
| GAIF01007905.1 | 2.99   | 4.33   | 2.55   | 5.01   | 19.73  | 5.12   |
| GAIF01007906.1 | 45.41  | 126.6  | 47.68  | 53.37  | 241.49 | 6.65   |
| GAIF01007909.1 | 0.34   | 0.73   | 0.12   | 0      | 0.54   | 0      |
| GAIF01007910.1 | 0.28   | 0      | 0      | 1.04   | 4.75   | 0      |
| GAIF01007911.1 | 5.37   | 8.76   | 3.98   | 4.64   | 5.18   | 0.62   |
| GAIF01007912.1 | 0.47   | 0.77   | 3.04   | 1.84   | 1.22   | 1.57   |
| GAIF01007913.1 | 31.23  | 11.7   | 18     | 19.72  | 13.47  | 7.84   |
| GAIF01007914.1 | 80.28  | 99.2   | 76.07  | 403.59 | 324.32 | 69.87  |

|                |         |        |          |         |         |         |
|----------------|---------|--------|----------|---------|---------|---------|
| GAIF01007915.1 | 1.87    | 1.07   | 0        | 8.02    | 15.8    | 1.65    |
| GAIF01007916.1 | 0       | 0      | 0        | 0.07    | 0       | 0       |
| GAIF01007917.1 | 35.74   | 13.09  | 18.32    | 5.22    | 3.24    | 6.7     |
| GAIF01007918.1 | 1.01    | 1.41   | 0        | 5.02    | 9.89    | 0.16    |
| GAIF01007919.1 | 9.53    | 8.12   | 0.48     | 22.53   | 46.55   | 2.9     |
| GAIF01007920.1 | 2.17    | 3.05   | 0.76     | 2.81    | 6.88    | 0.75    |
| GAIF01007921.1 | 0.08    | 0.09   | 0        | 0.92    | 1.52    | 0       |
| GAIF01007923.1 | 0       | 0.37   | 0        | 0.11    | 0.3     | 0.14    |
| GAIF01007924.1 | 74.2    | 109.74 | 94.46    | 75.27   | 45.88   | 25.64   |
| GAIF01007925.1 | 0       | 0      | 0        | 1.22    | 9.72    | 0       |
| GAIF01007926.1 | 0.58    | 0.47   | 0.16     | 1.51    | 5.03    | 0.16    |
| GAIF01007927.1 | 0.02    | 0      | 0        | 0.11    | 0.5     | 0       |
| GAIF01007929.1 | 0       | 0      | 0        | 0.16    | 0.17    | 0       |
| GAIF01007930.1 | 0.47    | 0.18   | 0.03     | 1.93    | 11.18   | 0.21    |
| GAIF01007932.1 | 0       | 0      | 0        | 1.3     | 0       | 0       |
| GAIF01007934.1 | 20.08   | 31.79  | 15.76    | 17.89   | 14.62   | 1.84    |
| GAIF01007935.1 | 6.82    | 6.33   | 2.19     | 20.07   | 28.39   | 3.66    |
| GAIF01007936.1 | 0.6     | 0.42   | 0.14     | 2.8     | 0.9     | 0.29    |
| GAIF01007937.1 | 35.95   | 28.6   | 12.87    | 97.48   | 104.9   | 169.13  |
| GAIF01007938.1 | 0.36    | 0.1    | 0.2      | 0.14    | 0.7     | 0       |
| GAIF01007939.1 | 39.98   | 43.45  | 53.11    | 83.53   | 69.74   | 54.49   |
| GAIF01007940.1 | 2.44    | 0.22   | 0        | 1.11    | 2.98    | 0       |
| GAIF01007941.1 | 0.45    | 0.34   | 0.25     | 1.01    | 0.54    | 0.17    |
| GAIF01007942.1 | 0       | 0.7    | 0.77     | 0       | 0       | 0.13    |
| GAIF01007944.1 | 0       | 0      | 0        | 5.38    | 0       | 0.12    |
| GAIF01007945.1 | 98.67   | 4.8    | 12.74    | 5       | 0.82    | 1.83    |
| GAIF01007946.1 | 2.64    | 0.5    | 0.2      | 8.88    | 53.92   | 0.5     |
| GAIF01007948.1 | 2.1     | 0.33   | 0.13     | 1.84    | 1.98    | 0       |
| GAIF01007949.1 | 0       | 0      | 0        | 0       | 0.04    | 0       |
| GAIF01007951.1 | 0.73    | 0      | 1.6      | 5.92    | 22.78   | 30.51   |
| GAIF01007952.1 | 7592.61 | 7550.1 | 12677.15 | 4146.38 | 2770.75 | 7090.38 |
| GAIF01007954.1 | 108.62  | 54.48  | 59.41    | 80.02   | 105.47  | 83.51   |
| GAIF01007957.1 | 0       | 0      | 0.11     | 0.06    | 0       | 0       |
| GAIF01007958.1 | 0       | 0.07   | 0.07     | 0       | 0       | 0       |
| GAIF01007959.1 | 168.07  | 112    | 152.87   | 209.8   | 287.78  | 256.78  |
| GAIF01007960.1 | 0       | 0.14   | 0        | 0.48    | 2.91    | 0.73    |
| GAIF01007961.1 | 0       | 0      | 0        | 0.33    | 2.77    | 0       |
| GAIF01007965.1 | 0.77    | 2.1    | 0        | 3.4     | 9.55    | 0.08    |
| GAIF01007967.1 | 0.21    | 0      | 0.04     | 0.37    | 0.02    | 0.25    |
| GAIF01007968.1 | 0       | 0      | 0.28     | 0       | 0       | 0       |
| GAIF01007969.1 | 12.21   | 13.02  | 9.25     | 38.21   | 47.32   | 12.56   |
| GAIF01007972.1 | 215.73  | 246.91 | 179.79   | 173.54  | 137.91  | 29.94   |
| GAIF01007973.1 | 5.02    | 0.93   | 2.64     | 3.97    | 9.39    | 3.67    |
| GAIF01007974.1 | 6.84    | 10.69  | 4.51     | 3.32    | 4.04    | 0.14    |

|                |        |        |        |        |        |        |
|----------------|--------|--------|--------|--------|--------|--------|
| GAIF01007976.1 | 0      | 0      | 0      | 0.06   | 0.1    | 0      |
| GAIF01007977.1 | 0      | 0      | 0      | 0      | 0.23   | 0      |
| GAIF01007978.1 | 26.68  | 21.66  | 47.27  | 100.54 | 85.65  | 41.37  |
| GAIF01007979.1 | 0.03   | 0.03   | 0      | 0.26   | 1.56   | 0.06   |
| GAIF01007980.1 | 0      | 0      | 0      | 0.04   | 0      | 0      |
| GAIF01007983.1 | 0      | 0.03   | 0.03   | 0.31   | 0.82   | 0      |
| GAIF01007984.1 | 0      | 0.04   | 0      | 0.04   | 0.04   | 0      |
| GAIF01007985.1 | 57.27  | 55.12  | 26.22  | 40.62  | 47.17  | 4.51   |
| GAIF01007986.1 | 3.34   | 1.19   | 0.15   | 7.17   | 13.22  | 2.95   |
| GAIF01007990.1 | 13.92  | 18.27  | 10.18  | 20.35  | 42.4   | 3.19   |
| GAIF01007992.1 | 23.92  | 23.07  | 18.37  | 76.15  | 56.24  | 21.27  |
| GAIF01007996.1 | 1.26   | 0.73   | 0      | 0.98   | 4.19   | 0      |
| GAIF01007998.1 | 0      | 0      | 0      | 0      | 0.26   | 0      |
| GAIF01007999.1 | 10.54  | 4.8    | 3.29   | 9.12   | 6.9    | 1.76   |
| GAIF01008000.1 | 595.58 | 137.93 | 209.74 | 488.48 | 137.97 | 351.68 |
| GAIF01008002.1 | 0      | 0      | 17.39  | 0.73   | 0      | 0      |
| GAIF01008003.1 | 4.99   | 0.73   | 0.3    | 11.9   | 40.93  | 3.47   |
| GAIF01008004.1 | 70.91  | 43.24  | 33.68  | 104.2  | 88.47  | 30.58  |
| GAIF01008005.1 | 12.35  | 13.06  | 4.9    | 0.13   | 0      | 0      |
| GAIF01008006.1 | 0.1    | 0.08   | 0.11   | 0.27   | 0.7    | 0      |
| GAIF01008007.1 | 0.12   | 0      | 0.23   | 0.17   | 0.1    | 0      |
| GAIF01008010.1 | 1.85   | 1.38   | 1.24   | 3.16   | 6.43   | 0.41   |
| GAIF01008011.1 | 0.13   | 0.17   | 0.45   | 0.22   | 0      | 0.1    |
| GAIF01008012.1 | 2.74   | 3.05   | 1.6    | 2.9    | 3.71   | 0.96   |
| GAIF01008014.1 | 0      | 0.03   | 0      | 0      | 0      | 0      |
| GAIF01008015.1 | 0      | 0.06   | 0      | 0      | 0.06   | 0      |
| GAIF01008016.1 | 1.41   | 1.25   | 0.89   | 6.18   | 5.78   | 0.57   |
| GAIF01008017.1 | 0.25   | 0      | 0.05   | 0.14   | 0      | 0      |
| GAIF01008018.1 | 2.29   | 3.59   | 0.56   | 5.6    | 2.14   | 0      |
| GAIF01008019.1 | 1.4    | 0.77   | 0.27   | 0.64   | 3.88   | 0.14   |
| GAIF01008021.1 | 1.46   | 0.88   | 0.63   | 2.33   | 3.83   | 0.09   |
| GAIF01008022.1 | 20.99  | 26.15  | 49.99  | 97.36  | 111.84 | 23.95  |
| GAIF01008024.1 | 0.12   | 0.04   | 0      | 0.71   | 8.03   | 0.14   |
| GAIF01008026.1 | 0      | 0.2    | 0      | 0      | 0      | 0      |
| GAIF01008027.1 | 8.99   | 1.18   | 0.93   | 6.49   | 17.88  | 8.03   |
| GAIF01008029.1 | 4.57   | 9.19   | 2.47   | 11.54  | 11.44  | 0.62   |
| GAIF01008030.1 | 0.11   | 0.13   | 0.12   | 0.26   | 0      | 0      |
| GAIF01008031.1 | 0.2    | 0.42   | 0.32   | 0.68   | 1.41   | 0.11   |
| GAIF01008032.1 | 0.08   | 0      | 0      | 0      | 1.78   | 0      |
| GAIF01008033.1 | 1.16   | 0.52   | 0.08   | 1.79   | 6.6    | 0.25   |
| GAIF01008034.1 | 51.72  | 38.65  | 32.38  | 61.78  | 49.89  | 51.55  |
| GAIF01008035.1 | 0.41   | 0      | 0      | 1.21   | 4.23   | 0      |
| GAIF01008036.1 | 0      | 0.18   | 0.04   | 0.13   | 0.69   | 0.16   |
| GAIF01008037.1 | 0.1    | 0      | 0.23   | 0.48   | 0.5    | 0      |

|                |        |       |       |        |         |         |
|----------------|--------|-------|-------|--------|---------|---------|
| GAIF01008038.1 | 0      | 0.17  | 0     | 0      | 0       | 0       |
| GAIF01008040.1 | 3.53   | 3.19  | 4.23  | 11.15  | 8.59    | 1.79    |
| GAIF01008042.1 | 13.55  | 0     | 0     | 0      | 17.98   | 1.08    |
| GAIF01008043.1 | 0.04   | 0.55  | 0.44  | 4.08   | 1.27    | 0.62    |
| GAIF01008045.1 | 0      | 0     | 0     | 1.6    | 0       | 0       |
| GAIF01008046.1 | 0.05   | 0.08  | 0.08  | 0.08   | 0.25    | 0       |
| GAIF01008047.1 | 25.77  | 30.4  | 31.92 | 31.62  | 28.6    | 10.92   |
| GAIF01008049.1 | 1.34   | 1.69  | 1.94  | 1.11   | 0.56    | 0.94    |
| GAIF01008051.1 | 0      | 0     | 0     | 0      | 0.13    | 0       |
| GAIF01008053.1 | 1.01   | 0     | 0     | 3.53   | 18.49   | 0       |
| GAIF01008055.1 | 14.94  | 21.25 | 21.73 | 49.65  | 22.78   | 9.31    |
| GAIF01008056.1 | 4.99   | 29.32 | 9.39  | 51.88  | 70.67   | 16.14   |
| GAIF01008058.1 | 58.01  | 44.11 | 26.35 | 14.02  | 14.1    | 2.67    |
| GAIF01008059.1 | 0.12   | 0     | 0.05  | 0      | 0.31    | 0       |
| GAIF01008061.1 | 0.35   | 0.19  | 0     | 2.05   | 2.76    | 0       |
| GAIF01008062.1 | 0.68   | 0     | 0     | 1.59   | 3.12    | 0.3     |
| GAIF01008063.1 | 8.48   | 9.28  | 12.42 | 24.8   | 12.49   | 5.51    |
| GAIF01008064.1 | 0      | 0     | 0     | 0.71   | 4.41    | 0.34    |
| GAIF01008065.1 | 0      | 0.04  | 0     | 0      | 0       | 0       |
| GAIF01008067.1 | 0      | 0.03  | 0     | 0.04   | 0       | 0       |
| GAIF01008068.1 | 0.02   | 0     | 0     | 0      | 0.1     | 0       |
| GAIF01008069.1 | 2.94   | 5.47  | 2.89  | 16.48  | 11.89   | 0.53    |
| GAIF01008071.1 | 0      | 0     | 0     | 0      | 11.55   | 0       |
| GAIF01008072.1 | 1.1    | 0.26  | 0.44  | 0.3    | 0.16    | 0.04    |
| GAIF01008074.1 | 0      | 0.4   | 0     | 0      | 5.44    | 0       |
| GAIF01008076.1 | 21.64  | 11.29 | 17.18 | 7.71   | 7.9     | 5.59    |
| GAIF01008079.1 | 0.24   | 0.39  | 0     | 1.24   | 6.13    | 0.13    |
| GAIF01008081.1 | 101.7  | 44.87 | 48.24 | 61.5   | 59.63   | 76.24   |
| GAIF01008082.1 | 0      | 0     | 0     | 0      | 0.15    | 0.28    |
| GAIF01008083.1 | 5.94   | 4.21  | 3.37  | 19.54  | 18.45   | 4.3     |
| GAIF01008084.1 | 22.38  | 17.71 | 32.02 | 67.54  | 56.94   | 29.75   |
| GAIF01008085.1 | 0.1    | 0     | 0     | 0.61   | 3.02    | 0.23    |
| GAIF01008087.1 | 0      | 0     | 0     | 0      | 0.52    | 0       |
| GAIF01008088.1 | 0.43   | 0     | 0     | 0.13   | 0       | 0       |
| GAIF01008090.1 | 0.33   | 0     | 0.06  | 0      | 0       | 0       |
| GAIF01008092.1 | 0.02   | 0.05  | 0.08  | 0.03   | 0       | 0       |
| GAIF01008093.1 | 11.41  | 6.1   | 8.67  | 25.5   | 8.81    | 2.41    |
| GAIF01008094.1 | 35.7   | 8.24  | 12.98 | 12.65  | 19.87   | 38.4    |
| GAIF01008095.1 | 0      | 0.09  | 0.2   | 1.6    | 4.76    | 0.38    |
| GAIF01008096.1 | 2.28   | 0.26  | 0     | 8.77   | 33.01   | 0.4     |
| GAIF01008097.1 | 935.14 | 46.58 | 60.6  | 876.62 | 1631.23 | 6389.96 |
| GAIF01008099.1 | 0      | 0     | 0     | 0.27   | 2.06    | 0.1     |
| GAIF01008100.1 | 10.23  | 11.35 | 9.42  | 20.9   | 12.67   | 1.66    |
| GAIF01008101.1 | 0      | 5.23  | 0.1   | 0      | 0       | 0.1     |

|                |         |        |        |         |        |         |
|----------------|---------|--------|--------|---------|--------|---------|
| GAIF01008102.1 | 12.69   | 8      | 4.55   | 24.17   | 24.61  | 2.85    |
| GAIF01008103.1 | 266.57  | 946.84 | 491.28 | 32.76   | 33.3   | 16.97   |
| GAIF01008104.1 | 0       | 0      | 0      | 0       | 0.15   | 0       |
| GAIF01008105.1 | 0       | 0      | 0      | 0.28    | 2.21   | 0       |
| GAIF01008106.1 | 11.53   | 21.72  | 17.17  | 46.25   | 25.28  | 9.13    |
| GAIF01008107.1 | 3.52    | 5.6    | 0.76   | 10.81   | 28.24  | 0       |
| GAIF01008108.1 | 0       | 0      | 0      | 0       | 0.04   | 0       |
| GAIF01008109.1 | 9.18    | 1.7    | 1.07   | 16.1    | 37.35  | 3.01    |
| GAIF01008110.1 | 0       | 0.12   | 0      | 0.27    | 1.38   | 0       |
| GAIF01008111.1 | 0.18    | 0      | 0      | 0.13    | 0.05   | 0       |
| GAIF01008112.1 | 0.11    | 0.36   | 0.48   | 1.41    | 0.93   | 0       |
| GAIF01008113.1 | 6.4     | 5.05   | 1.67   | 7.89    | 17.42  | 0.09    |
| GAIF01008114.1 | 10.59   | 8.15   | 4.99   | 15.75   | 26.76  | 7.25    |
| GAIF01008115.1 | 4.34    | 7.34   | 4.76   | 2.18    | 2.9    | 0.06    |
| GAIF01008116.1 | 36.56   | 60.05  | 59.49  | 52.57   | 35.36  | 17.08   |
| GAIF01008117.1 | 9.28    | 5.88   | 6.49   | 17.26   | 23.16  | 17.31   |
| GAIF01008118.1 | 5.18    | 7.8    | 8.3    | 12.19   | 8.08   | 1.03    |
| GAIF01008120.1 | 69.78   | 36.68  | 40.2   | 19.09   | 21.38  | 9.86    |
| GAIF01008121.1 | 0.43    | 0.04   | 0.12   | 0.15    | 0.12   | 0.1     |
| GAIF01008123.1 | 0       | 0      | 0      | 0       | 0.26   | 0       |
| GAIF01008124.1 | 92.77   | 125.97 | 34.23  | 80.14   | 69.72  | 4.14    |
| GAIF01008126.1 | 0.06    | 0      | 0.07   | 0       | 0      | 0       |
| GAIF01008127.1 | 0.33    | 0.09   | 0      | 0.1     | 0      | 0       |
| GAIF01008128.1 | 2.86    | 2.92   | 0.95   | 11.48   | 23.06  | 0.86    |
| GAIF01008129.1 | 0.37    | 0.16   | 0      | 1.66    | 6.36   | 0.75    |
| GAIF01008130.1 | 3.85    | 4.19   | 6.13   | 0.22    | 0      | 0       |
| GAIF01008131.1 | 2.93    | 2.07   | 0      | 5.94    | 18.83  | 0.16    |
| GAIF01008132.1 | 4.54    | 1.29   | 0.47   | 17.93   | 83.66  | 12.02   |
| GAIF01008133.1 | 1004.07 | 420.16 | 529.22 | 1156.53 | 525.74 | 2098.34 |
| GAIF01008134.1 | 2.25    | 2.99   | 5.49   | 4.64    | 1.65   | 1.24    |
| GAIF01008135.1 | 18.25   | 13.01  | 10.47  | 57.11   | 68.48  | 8.57    |
| GAIF01008138.1 | 0       | 0      | 0      | 0.21    | 0.87   | 0       |
| GAIF01008139.1 | 4.17    | 2.49   | 5.58   | 0.45    | 1.24   | 0.97    |
| GAIF01008140.1 | 129.08  | 61.4   | 53.25  | 14.11   | 30.54  | 10.44   |
| GAIF01008142.1 | 0       | 0.07   | 0      | 0       | 0      | 0       |
| GAIF01008143.1 | 2.21    | 0.25   | 0      | 12.89   | 68.89  | 0.92    |
| GAIF01008144.1 | 189.58  | 126.18 | 95.25  | 191.51  | 223.91 | 85.03   |
| GAIF01008145.1 | 6.22    | 2.91   | 3.89   | 4.58    | 3.82   | 6.42    |
| GAIF01008146.1 | 8.27    | 11.91  | 2.45   | 30.9    | 44.1   | 4.01    |
| GAIF01008147.1 | 3.02    | 1.64   | 0      | 18.86   | 29.78  | 0       |
| GAIF01008149.1 | 0       | 0      | 0      | 0       | 5.24   | 0       |
| GAIF01008153.1 | 4.98    | 7.13   | 0      | 58.33   | 103.92 | 0       |
| GAIF01008154.1 | 0.04    | 0.05   | 0      | 0.88    | 8.32   | 0       |
| GAIF01008155.1 | 0.28    | 0.36   | 0.31   | 0.71    | 0.34   | 0.26    |

|                |        |        |        |         |         |        |
|----------------|--------|--------|--------|---------|---------|--------|
| GAIF01008156.1 | 30.87  | 22.52  | 15.36  | 32.99   | 43.17   | 16.66  |
| GAIF01008157.1 | 0.36   | 0      | 0      | 0.24    | 0       | 0.06   |
| GAIF01008158.1 | 0      | 0.3    | 0.25   | 0       | 0.17    | 0      |
| GAIF01008159.1 | 0      | 0      | 0      | 0.18    | 0.68    | 0      |
| GAIF01008160.1 | 0.12   | 0      | 0      | 1.03    | 4.3     | 0.04   |
| GAIF01008161.1 | 0.15   | 0      | 0      | 0.28    | 0.06    | 0      |
| GAIF01008162.1 | 220.17 | 39.99  | 3.92   | 533.81  | 1324.4  | 26.75  |
| GAIF01008167.1 | 2.93   | 3.61   | 3.43   | 1.81    | 3.05    | 2.8    |
| GAIF01008168.1 | 19.29  | 17.61  | 13.23  | 23.05   | 24.52   | 32.42  |
| GAIF01008170.1 | 0      | 0.32   | 0      | 1.48    | 13.43   | 0.32   |
| GAIF01008171.1 | 0.13   | 0.04   | 0.04   | 0       | 5.28    | 0.2    |
| GAIF01008172.1 | 0      | 0      | 0      | 0       | 0.62    | 0      |
| GAIF01008174.1 | 0      | 0      | 0      | 0       | 0       | 0.17   |
| GAIF01008175.1 | 2.85   | 3.95   | 5.77   | 2.26    | 1.33    | 1      |
| GAIF01008177.1 | 27.39  | 27.44  | 6.45   | 34.4    | 62.16   | 44.77  |
| GAIF01008178.1 | 0.59   | 0      | 0.13   | 1.78    | 13.73   | 0.65   |
| GAIF01008182.1 | 0.83   | 1.29   | 0.78   | 1.51    | 1.56    | 0.65   |
| GAIF01008184.1 | 11.07  | 22.68  | 10.86  | 37.43   | 44.01   | 3.26   |
| GAIF01008185.1 | 0      | 0.48   | 0      | 0.67    | 0       | 0      |
| GAIF01008186.1 | 0      | 0      | 0.05   | 0.2     | 0.88    | 0      |
| GAIF01008187.1 | 0      | 0      | 0      | 0.02    | 0       | 0      |
| GAIF01008190.1 | 13.69  | 17.01  | 11.77  | 33.01   | 22.65   | 8.39   |
| GAIF01008191.1 | 1.52   | 0.16   | 0.11   | 4.84    | 15.39   | 0      |
| GAIF01008192.1 | 0      | 0      | 0.14   | 0       | 0       | 0      |
| GAIF01008193.1 | 0.11   | 0.23   | 0.23   | 0.73    | 3.03    | 0.35   |
| GAIF01008194.1 | 381.38 | 590.99 | 776.05 | 1998.59 | 1259.86 | 320.87 |
| GAIF01008196.1 | 0.25   | 0      | 0.13   | 1.24    | 4.88    | 0.31   |
| GAIF01008197.1 | 0.74   | 0      | 2.09   | 0.76    | 0       | 0      |
| GAIF01008198.1 | 0.19   | 0.05   | 0      | 0.43    | 2.06    | 0.02   |
| GAIF01008200.1 | 0      | 0.22   | 0.15   | 0       | 0       | 0.04   |
| GAIF01008201.1 | 0      | 0      | 0      | 0       | 0.18    | 0.08   |
| GAIF01008203.1 | 0.12   | 0      | 0      | 0       | 4.34    | 1.41   |
| GAIF01008205.1 | 38.19  | 92.27  | 60.81  | 73.61   | 55.42   | 7.44   |
| GAIF01008207.1 | 62.99  | 73.12  | 62.28  | 160.26  | 88.26   | 23.98  |
| GAIF01008208.1 | 10.79  | 8.59   | 1.88   | 57.43   | 4.75    | 0.15   |
| GAIF01008209.1 | 0.47   | 0.04   | 0.24   | 0.08    | 1.81    | 0.12   |
| GAIF01008210.1 | 0.52   | 0      | 0      | 0.91    | 3.62    | 0      |
| GAIF01008211.1 | 21.58  | 12.56  | 7.37   | 40.95   | 46.16   | 26.92  |
| GAIF01008212.1 | 13.4   | 9.88   | 4.46   | 6.29    | 3.18    | 1.38   |
| GAIF01008213.1 | 0      | 0      | 0      | 1.11    | 6.13    | 0      |
| GAIF01008216.1 | 0.72   | 0      | 1.32   | 3.52    | 3.36    | 9.51   |
| GAIF01008217.1 | 70.74  | 38.08  | 19.93  | 87.62   | 62.68   | 10.14  |
| GAIF01008220.1 | 81.31  | 24.09  | 69.65  | 40.43   | 16.41   | 114.15 |
| GAIF01008221.1 | 0      | 0      | 0.19   | 0.1     | 0.07    | 0.03   |

|                |        |        |        |        |        |       |
|----------------|--------|--------|--------|--------|--------|-------|
| GAIF01008222.1 | 0      | 0.08   | 0      | 114.63 | 0      | 0.33  |
| GAIF01008223.1 | 71.75  | 98.5   | 60.84  | 83.62  | 31.75  | 11.1  |
| GAIF01008224.1 | 13.86  | 15.87  | 14.42  | 19.06  | 9.87   | 6.43  |
| GAIF01008226.1 | 0      | 0      | 0      | 0.29   | 0      | 0     |
| GAIF01008230.1 | 0      | 0      | 0.42   | 0      | 0      | 0     |
| GAIF01008231.1 | 2.05   | 2.37   | 3.14   | 1.42   | 3.61   | 0.9   |
| GAIF01008232.1 | 0.11   | 0      | 0.04   | 0.16   | 1.53   | 0.04  |
| GAIF01008233.1 | 0.08   | 0.45   | 0.54   | 0      | 0      | 0     |
| GAIF01008234.1 | 0.05   | 0      | 0      | 0      | 0      | 0     |
| GAIF01008235.1 | 0      | 0.06   | 0.1    | 0      | 0.07   | 0     |
| GAIF01008237.1 | 84.73  | 153.34 | 18.3   | 134.01 | 229.85 | 7.43  |
| GAIF01008238.1 | 42.23  | 63.36  | 48.23  | 53.65  | 52.39  | 8.6   |
| GAIF01008240.1 | 0      | 0.42   | 0.28   | 0      | 0      | 0.16  |
| GAIF01008241.1 | 0.04   | 0.13   | 0.09   | 0.25   | 0.56   | 0.02  |
| GAIF01008242.1 | 0.21   | 0.35   | 0      | 2.22   | 8.56   | 0.12  |
| GAIF01008243.1 | 0.09   | 0.1    | 0.21   | 0      | 0.45   | 0     |
| GAIF01008244.1 | 1.23   | 1.12   | 0      | 0.38   | 0.16   | 0.08  |
| GAIF01008245.1 | 0.03   | 0      | 0      | 0.16   | 0.27   | 0     |
| GAIF01008246.1 | 0.03   | 0.03   | 0      | 0.07   | 0.23   | 0     |
| GAIF01008248.1 | 0.11   | 0.19   | 0      | 0.58   | 1.13   | 0.05  |
| GAIF01008250.1 | 7.38   | 8.12   | 6.56   | 2.24   | 3.95   | 1.95  |
| GAIF01008253.1 | 0.18   | 0      | 0.2    | 0.21   | 0.43   | 0     |
| GAIF01008257.1 | 0      | 0      | 0      | 0      | 0.17   | 0     |
| GAIF01008258.1 | 0.15   | 0.22   | 0.11   | 0.2    | 2.03   | 0.06  |
| GAIF01008260.1 | 0      | 0.05   | 0      | 0.22   | 0.66   | 0     |
| GAIF01008261.1 | 0.95   | 0.78   | 0.52   | 0.28   | 0.29   | 0     |
| GAIF01008262.1 | 0.45   | 0.18   | 0.15   | 0.11   | 0.1    | 0.28  |
| GAIF01008263.1 | 0.23   | 0.1    | 0      | 0.78   | 6.31   | 0.57  |
| GAIF01008264.1 | 30.49  | 5.66   | 7.05   | 32.45  | 53.49  | 65.19 |
| GAIF01008265.1 | 6.36   | 14.24  | 4.17   | 43.69  | 48.32  | 2.56  |
| GAIF01008266.1 | 0      | 0      | 0      | 0.1    | 0.53   | 0     |
| GAIF01008268.1 | 0.21   | 0      | 0      | 0      | 0      | 0.11  |
| GAIF01008271.1 | 0.06   | 0      | 0      | 0.15   | 0.08   | 0     |
| GAIF01008272.1 | 0      | 0      | 0      | 0      | 0.1    | 0     |
| GAIF01008273.1 | 0      | 0      | 0      | 0      | 0.82   | 0     |
| GAIF01008274.1 | 0.36   | 0      | 0.22   | 0      | 0      | 0.22  |
| GAIF01008277.1 | 0      | 2.88   | 2.53   | 0.63   | 0      | 1.77  |
| GAIF01008278.1 | 26.85  | 29.84  | 24.34  | 79.16  | 63.25  | 20.93 |
| GAIF01008280.1 | 0      | 0      | 0      | 0      | 0.15   | 0     |
| GAIF01008282.1 | 5.38   | 2.77   | 2.48   | 4.36   | 21.38  | 3.28  |
| GAIF01008283.1 | 0.07   | 0      | 0      | 0      | 0.74   | 0     |
| GAIF01008285.1 | 70.61  | 66.64  | 68.78  | 80.88  | 60.53  | 78    |
| GAIF01008286.1 | 198.94 | 125.21 | 189.71 | 139.78 | 184.37 | 87.86 |
| GAIF01008287.1 | 5.89   | 6.54   | 1.21   | 1.35   | 1.18   | 0     |

|                |         |         |         |        |        |        |
|----------------|---------|---------|---------|--------|--------|--------|
| GAIF01008288.1 | 24.15   | 27.08   | 11.71   | 27.67  | 38.29  | 25.69  |
| GAIF01008289.1 | 0       | 0       | 0       | 0      | 2.04   | 0      |
| GAIF01008290.1 | 0       | 0       | 0       | 0.24   | 0.24   | 0      |
| GAIF01008291.1 | 0.33    | 0.04    | 0.04    | 2.26   | 9.54   | 0.25   |
| GAIF01008293.1 | 0       | 0.16    | 0       | 0      | 0.02   | 0      |
| GAIF01008294.1 | 50.05   | 97.8    | 51.67   | 19.19  | 14.45  | 0.85   |
| GAIF01008297.1 | 0       | 0       | 0       | 0      | 0.02   | 0      |
| GAIF01008298.1 | 23.97   | 17.09   | 47.17   | 11.54  | 4.22   | 23.96  |
| GAIF01008300.1 | 0.23    | 0.56    | 0.23    | 0.65   | 0.72   | 0      |
| GAIF01008302.1 | 1115.94 | 1798.48 | 1233.09 | 679.03 | 646.88 | 127.05 |
| GAIF01008303.1 | 19.36   | 15.79   | 9.04    | 56.07  | 23.19  | 4.11   |
| GAIF01008304.1 | 0       | 0       | 0       | 0      | 0      | 2.8    |
| GAIF01008307.1 | 341.89  | 320.29  | 211.06  | 498.46 | 407.16 | 289.14 |
| GAIF01008308.1 | 0.1     | 0.07    | 0       | 0      | 0.1    | 0      |
| GAIF01008311.1 | 0       | 0       | 0       | 0.52   | 0.89   | 0      |
| GAIF01008312.1 | 15.4    | 8.34    | 8.37    | 28.56  | 16.64  | 8.46   |
| GAIF01008314.1 | 3.36    | 4.01    | 1.62    | 10.98  | 16.49  | 0.92   |
| GAIF01008316.1 | 0       | 0       | 0       | 0      | 0.19   | 0      |
| GAIF01008319.1 | 0.37    | 0.5     | 0.1     | 0.85   | 4.3    | 0.2    |
| GAIF01008322.1 | 0       | 0       | 0       | 0.62   | 0.89   | 0      |
| GAIF01008324.1 | 2.48    | 0.24    | 0.06    | 3.86   | 8.46   | 20.85  |
| GAIF01008325.1 | 1.24    | 3.51    | 0.25    | 0.45   | 0.74   | 1.01   |
| GAIF01008326.1 | 53.86   | 38.02   | 32.87   | 79.33  | 53.27  | 33.26  |
| GAIF01008328.1 | 3.39    | 2.26    | 3.13    | 1.31   | 0.57   | 0.13   |
| GAIF01008329.1 | 1.44    | 6.01    | 0.02    | 0.23   | 0.01   | 0.13   |
| GAIF01008330.1 | 0       | 0.01    | 0       | 0.01   | 0      | 0      |
| GAIF01008331.1 | 0       | 15.14   | 8.66    | 29.35  | 19.4   | 2.42   |
| GAIF01008332.1 | 10.9    | 29.91   | 31.16   | 10.21  | 26.48  | 12.61  |
| GAIF01008334.1 | 0.39    | 0.47    | 0.32    | 2.04   | 5.22   | 0.71   |
| GAIF01008336.1 | 1591.46 | 1511.12 | 2056.25 | 779.32 | 452.47 | 340.75 |
| GAIF01008337.1 | 16.35   | 18.12   | 11.43   | 48.13  | 37.33  | 5.5    |
| GAIF01008338.1 | 0       | 0       | 0       | 0      | 0.07   | 0      |
| GAIF01008339.1 | 0       | 0.27    | 0       | 0.97   | 2.92   | 0      |
| GAIF01008340.1 | 93.88   | 127.43  | 82.08   | 95.93  | 68.87  | 18.74  |
| GAIF01008341.1 | 2.05    | 2.36    | 1.19    | 5.04   | 8.71   | 1.46   |
| GAIF01008343.1 | 101.45  | 54.09   | 62.6    | 152.29 | 149.74 | 120.85 |
| GAIF01008344.1 | 5.98    | 0       | 0.79    | 4.01   | 0.4    | 8.23   |
| GAIF01008345.1 | 0.72    | 0.43    | 0.51    | 0.29   | 0      | 0.05   |
| GAIF01008346.1 | 0.19    | 0.07    | 0       | 0.44   | 1.38   | 0.14   |
| GAIF01008347.1 | 0.19    | 0       | 0.1     | 0.33   | 0.68   | 0.31   |
| GAIF01008349.1 | 0       | 0       | 0       | 0      | 0.24   | 0.22   |
| GAIF01008350.1 | 0.07    | 0       | 0       | 1.02   | 5.14   | 0.45   |
| GAIF01008351.1 | 39.92   | 41.36   | 41.31   | 58.65  | 21.79  | 10.56  |
| GAIF01008354.1 | 0.21    | 0       | 0       | 0.61   | 2.65   | 0      |



|                |        |       |        |        |        |       |
|----------------|--------|-------|--------|--------|--------|-------|
| GAIF01008355.1 | 0      | 0     | 0      | 0      | 0.32   | 0     |
| GAIF01008356.1 | 0      | 0.22  | 0      | 0      | 0.12   | 0     |
| GAIF01008357.1 | 6.08   | 3.1   | 1.61   | 14.41  | 31.31  | 2.24  |
| GAIF01008358.1 | 0      | 0     | 0      | 0.22   | 0      | 0     |
| GAIF01008360.1 | 0      | 0.28  | 0      | 0.15   | 0      | 0     |
| GAIF01008361.1 | 4.16   | 4.52  | 1.29   | 7.06   | 8.98   | 0.12  |
| GAIF01008365.1 | 0      | 0     | 0      | 2.28   | 15.07  | 0.89  |
| GAIF01008367.1 | 2.21   | 1.6   | 0.17   | 0.67   | 0.44   | 0     |
| GAIF01008368.1 | 0.12   | 0.13  | 0.13   | 0.14   | 1.15   | 0.13  |
| GAIF01008369.1 | 6.87   | 11.62 | 8.06   | 18.94  | 15.74  | 2.01  |
| GAIF01008371.1 | 0      | 0.26  | 0      | 0      | 0.44   | 0     |
| GAIF01008373.1 | 0.14   | 0.15  | 0.3    | 1.12   | 1.5    | 0.46  |
| GAIF01008374.1 | 0      | 0     | 0      | 0      | 0.94   | 0     |
| GAIF01008375.1 | 2.8    | 0.94  | 0.47   | 10.2   | 20.57  | 0.95  |
| GAIF01008376.1 | 0      | 0     | 0      | 0.26   | 0.45   | 0     |
| GAIF01008377.1 | 0.48   | 0.06  | 0.26   | 0.56   | 2.95   | 0.53  |
| GAIF01008378.1 | 0.07   | 0.02  | 0.04   | 0.04   | 0.1    | 0     |
| GAIF01008379.1 | 0.27   | 0     | 0      | 0.16   | 0.16   | 0     |
| GAIF01008380.1 | 2      | 3.86  | 0.46   | 51.39  | 3.84   | 1     |
| GAIF01008381.1 | 375.49 | 82.95 | 102.96 | 5.58   | 3.58   | 7.33  |
| GAIF01008382.1 | 43.26  | 46.78 | 71.2   | 73.08  | 29.25  | 36.99 |
| GAIF01008383.1 | 15.47  | 20.87 | 20.15  | 26.32  | 17.7   | 11.46 |
| GAIF01008384.1 | 0      | 7.88  | 5.55   | 0      | 0.18   | 2.75  |
| GAIF01008385.1 | 0.19   | 0.31  | 0      | 0.47   | 0.26   | 0     |
| GAIF01008386.1 | 2.78   | 1.2   | 1.69   | 1.33   | 1.79   | 0.4   |
| GAIF01008388.1 | 1.26   | 0.26  | 0      | 1.93   | 1.44   | 1.74  |
| GAIF01008389.1 | 0.2    | 0.09  | 0.06   | 3.14   | 7.63   | 0.03  |
| GAIF01008390.1 | 0.29   | 0     | 0.22   | 1.11   | 2.53   | 0.09  |
| GAIF01008391.1 | 5.38   | 8.17  | 1.8    | 7.72   | 11.52  | 0.54  |
| GAIF01008392.1 | 15.6   | 13.26 | 7.54   | 58.01  | 31.11  | 14.07 |
| GAIF01008393.1 | 0.11   | 0.06  | 0.13   | 0.33   | 0.96   | 0     |
| GAIF01008394.1 | 0      | 0     | 0      | 0      | 0.19   | 0     |
| GAIF01008395.1 | 11.04  | 9.23  | 6.66   | 30.68  | 11.52  | 18.71 |
| GAIF01008396.1 | 0.83   | 0.16  | 0.21   | 2.05   | 5.74   | 0.17  |
| GAIF01008399.1 | 9.47   | 5.52  | 3.08   | 13.9   | 16.02  | 5.82  |
| GAIF01008400.1 | 16.68  | 14.98 | 27.91  | 14.83  | 7.49   | 8.95  |
| GAIF01008401.1 | 0.42   | 0.34  | 0      | 0.36   | 1.76   | 0     |
| GAIF01008403.1 | 0.1    | 0     | 0      | 0      | 0      | 0.06  |
| GAIF01008404.1 | 79.79  | 37.56 | 29.95  | 53.33  | 32.91  | 96.32 |
| GAIF01008405.1 | 0.08   | 0     | 0      | 0      | 0.3    | 0     |
| GAIF01008406.1 | 0      | 0     | 0      | 0.15   | 1.36   | 0     |
| GAIF01008409.1 | 0      | 0.15  | 0.16   | 1.15   | 1.49   | 0     |
| GAIF01008411.1 | 34.47  | 31.16 | 27.03  | 178.35 | 222.96 | 39.56 |
| GAIF01008412.1 | 0      | 0     | 0      | 0.08   | 0      | 0     |

|                |       |        |        |       |       |       |
|----------------|-------|--------|--------|-------|-------|-------|
| GAIF01008413.1 | 0     | 1.16   | 22.43  | 0     | 0.72  | 10.43 |
| GAIF01008414.1 | 0     | 0      | 0.15   | 0     | 0     | 0     |
| GAIF01008415.1 | 0     | 0      | 0      | 1.37  | 5.85  | 0     |
| GAIF01008417.1 | 0     | 0      | 0      | 0.07  | 0.31  | 0     |
| GAIF01008418.1 | 0.15  | 0      | 0      | 0     | 0.54  | 0.16  |
| GAIF01008419.1 | 21.88 | 14.03  | 18.66  | 4.81  | 0     | 21.83 |
| GAIF01008420.1 | 0.32  | 0      | 1.18   | 0.48  | 0     | 0.99  |
| GAIF01008421.1 | 0     | 0      | 0      | 0.14  | 0.14  | 0     |
| GAIF01008422.1 | 0     | 0      | 0      | 0.22  | 0.05  | 0     |
| GAIF01008423.1 | 0     | 0      | 0      | 0.11  | 0     | 0     |
| GAIF01008424.1 | 0.02  | 0      | 0      | 0.11  | 0.24  | 0     |
| GAIF01008425.1 | 0     | 0      | 0      | 0.44  | 0     | 0     |
| GAIF01008426.1 | 0     | 0      | 0.12   | 0.12  | 0.14  | 0     |
| GAIF01008428.1 | 0.36  | 0      | 0.7    | 0.71  | 0.16  | 0     |
| GAIF01008429.1 | 1.55  | 0.73   | 0.83   | 3.25  | 14.56 | 1.05  |
| GAIF01008432.1 | 0     | 0      | 0      | 0     | 0.04  | 0     |
| GAIF01008433.1 | 10.3  | 12.62  | 14.43  | 17.31 | 12.55 | 5.44  |
| GAIF01008434.1 | 0.13  | 0.29   | 0.44   | 0     | 1.45  | 0.29  |
| GAIF01008436.1 | 37.84 | 9.72   | 4.5    | 8.98  | 7.16  | 0     |
| GAIF01008437.1 | 0.94  | 0.2    | 0.16   | 2.78  | 9.8   | 3.19  |
| GAIF01008438.1 | 0     | 0      | 0      | 0     | 0.14  | 0     |
| GAIF01008440.1 | 0.11  | 0.04   | 0      | 1.19  | 5.67  | 0.08  |
| GAIF01008442.1 | 0     | 0.09   | 0.09   | 0     | 0.1   | 0.33  |
| GAIF01008443.1 | 0     | 0      | 0      | 0.05  | 0     | 0     |
| GAIF01008444.1 | 13.57 | 17.41  | 15.66  | 39.17 | 38.66 | 25.42 |
| GAIF01008445.1 | 0     | 1.46   | 0      | 0     | 1.09  | 0     |
| GAIF01008448.1 | 13.31 | 10.74  | 8.48   | 22.92 | 18.07 | 8.52  |
| GAIF01008449.1 | 0.25  | 1.62   | 7.34   | 0.6   | 1.37  | 7.73  |
| GAIF01008452.1 | 0     | 0      | 0      | 0     | 0.15  | 0     |
| GAIF01008454.1 | 0.94  | 1.16   | 0.7    | 5.66  | 11.45 | 0.08  |
| GAIF01008456.1 | 0.78  | 0      | 0      | 2.62  | 7.88  | 0     |
| GAIF01008458.1 | 3.44  | 0      | 0.01   | 2.87  | 0.83  | 0.21  |
| GAIF01008459.1 | 6.75  | 8.37   | 8.98   | 1.11  | 0.29  | 1.75  |
| GAIF01008460.1 | 0.37  | 0      | 0      | 0.57  | 0.44  | 0.27  |
| GAIF01008462.1 | 0.04  | 0.29   | 0.14   | 0.1   | 0.52  | 0     |
| GAIF01008463.1 | 0     | 7.69   | 16.77  | 0     | 0     | 1.71  |
| GAIF01008464.1 | 2.32  | 0.23   | 0      | 16.52 | 56.51 | 0.62  |
| GAIF01008466.1 | 42.8  | 109.58 | 117.86 | 7.56  | 7.22  | 6.97  |
| GAIF01008468.1 | 34.32 | 57.46  | 20.76  | 42.75 | 63.71 | 13.45 |
| GAIF01008469.1 | 10.73 | 6.78   | 8.9    | 1.92  | 0.72  | 6.23  |
| GAIF01008470.1 | 1.75  | 0.35   | 0      | 6.61  | 34.32 | 0.43  |
| GAIF01008472.1 | 0     | 0.04   | 0      | 0     | 0     | 0     |
| GAIF01008473.1 | 3.11  | 1.33   | 0.27   | 13.86 | 47.35 | 0.45  |
| GAIF01008474.1 | 3.24  | 0.65   | 2.3    | 4.71  | 1.07  | 1.29  |

|                |         |         |         |         |         |         |
|----------------|---------|---------|---------|---------|---------|---------|
| GAIF01008475.1 | 0.05    | 0       | 0       | 0.12    | 0.09    | 0       |
| GAIF01008476.1 | 5.78    | 3.1     | 3.55    | 5.64    | 7.41    | 1.36    |
| GAIF01008478.1 | 8.14    | 0.93    | 7.06    | 0.65    | 0       | 0.19    |
| GAIF01008479.1 | 0       | 0.67    | 1.15    | 0       | 0       | 0       |
| GAIF01008480.1 | 0.18    | 0.2     | 0.3     | 0.74    | 0.98    | 0       |
| GAIF01008481.1 | 0.37    | 0.04    | 0       | 0.16    | 0.16    | 0       |
| GAIF01008482.1 | 639.22  | 214.03  | 148.75  | 1651.23 | 126.18  | 378.27  |
| GAIF01008484.1 | 3.06    | 8.78    | 5.54    | 11.4    | 17.6    | 3.52    |
| GAIF01008485.1 | 0       | 0       | 0       | 0       | 0.31    | 0       |
| GAIF01008486.1 | 7.31    | 6.95    | 5.58    | 23.34   | 32.18   | 4.14    |
| GAIF01008487.1 | 21.64   | 28.55   | 26.05   | 44.51   | 19.2    | 9.04    |
| GAIF01008488.1 | 0.04    | 0.03    | 0       | 0       | 0       | 0       |
| GAIF01008490.1 | 0.13    | 0       | 0       | 1.78    | 4.15    | 0       |
| GAIF01008492.1 | 116.9   | 106.25  | 107.75  | 228.42  | 254.33  | 111.9   |
| GAIF01008493.1 | 0.2     | 0.52    | 0.15    | 0.95    | 4.58    | 0.08    |
| GAIF01008494.1 | 22.01   | 30.53   | 31.8    | 44.98   | 38.42   | 10.24   |
| GAIF01008495.1 | 0       | 0       | 0       | 0       | 0.11    | 0       |
| GAIF01008496.1 | 0.2     | 1.44    | 1.12    | 0.12    | 0       | 0.22    |
| GAIF01008498.1 | 135.89  | 67.33   | 52.65   | 90.54   | 112.33  | 77.14   |
| GAIF01008499.1 | 7.8     | 4.15    | 5.03    | 9.8     | 8.77    | 8.55    |
| GAIF01008503.1 | 1.14    | 0.26    | 1.11    | 0       | 0.92    | 0.14    |
| GAIF01008504.1 | 0.16    | 0       | 0       | 0.3     | 2.48    | 0.11    |
| GAIF01008505.1 | 0.76    | 0.63    | 0.28    | 0.73    | 2.15    | 0.72    |
| GAIF01008507.1 | 53.83   | 51.19   | 36.36   | 113.68  | 142.03  | 24.27   |
| GAIF01008508.1 | 165.25  | 157.16  | 193.77  | 124.92  | 106.96  | 504.71  |
| GAIF01008511.1 | 0.64    | 0.91    | 0.57    | 4.88    | 11.42   | 6.64    |
| GAIF01008512.1 | 0.03    | 0       | 0       | 0       | 0.27    | 0       |
| GAIF01008513.1 | 0.17    | 0       | 0       | 0.4     | 3.69    | 0.19    |
| GAIF01008514.1 | 0.71    | 1.69    | 1.44    | 0.84    | 0       | 0       |
| GAIF01008515.1 | 137.99  | 172.41  | 366.95  | 173.95  | 118.27  | 261.92  |
| GAIF01008516.1 | 0.83    | 0.53    | 0       | 3.47    | 15.34   | 0       |
| GAIF01008518.1 | 135     | 25.58   | 8.33    | 34.85   | 74.66   | 16.58   |
| GAIF01008519.1 | 1610.61 | 1291.31 | 1310.83 | 1020.43 | 1173.01 | 6522.14 |
| GAIF01008520.1 | 0       | 0.23    | 0.09    | 0       | 0.35    | 0       |
| GAIF01008522.1 | 0       | 0       | 0       | 0       | 1.46    | 0       |
| GAIF01008523.1 | 0.04    | 0.13    | 0.28    | 0.07    | 0.1     | 0       |
| GAIF01008524.1 | 0.88    | 0.85    | 0.5     | 0.76    | 0.19    | 0.97    |
| GAIF01008525.1 | 0       | 0.04    | 0       | 0       | 0       | 0       |
| GAIF01008526.1 | 0       | 0       | 0       | 2.5     | 0       | 0       |
| GAIF01008527.1 | 0       | 0       | 0       | 0       | 0.11    | 0       |
| GAIF01008530.1 | 0.32    | 0.25    | 0.05    | 1.94    | 7.43    | 0.14    |
| GAIF01008531.1 | 4037.3  | 904.97  | 2012.86 | 47.84   | 35.8    | 127.94  |
| GAIF01008532.1 | 0.39    | 0.05    | 0.3     | 0.24    | 0.83    | 0.25    |
| GAIF01008533.1 | 0.07    | 0       | 0       | 0.22    | 0.75    | 0       |

|                |         |        |         |        |        |         |
|----------------|---------|--------|---------|--------|--------|---------|
| GAIF01008534.1 | 0       | 1.19   | 0.61    | 0      | 0      | 0       |
| GAIF01008535.1 | 0.98    | 0.15   | 0.07    | 8.04   | 12.05  | 0.8     |
| GAIF01008536.1 | 0.07    | 0      | 0.15    | 0.08   | 0      | 0       |
| GAIF01008537.1 | 0       | 0      | 0       | 3.07   | 7.19   | 0       |
| GAIF01008538.1 | 0.69    | 1.41   | 0.71    | 0.35   | 0.32   | 0.08    |
| GAIF01008540.1 | 43.42   | 25.78  | 15.55   | 4.27   | 4.09   | 1.43    |
| GAIF01008541.1 | 258.44  | 153.81 | 323.05  | 26.43  | 12.7   | 30.44   |
| GAIF01008542.1 | 4.85    | 0.93   | 0.78    | 11.25  | 34.87  | 6.75    |
| GAIF01008543.1 | 0       | 0      | 0       | 0      | 0.19   | 0       |
| GAIF01008544.1 | 0       | 0      | 0       | 0      | 0.25   | 0       |
| GAIF01008545.1 | 0       | 0      | 0       | 0.17   | 0.35   | 0.16    |
| GAIF01008546.1 | 0       | 0      | 0.1     | 0.32   | 3.29   | 0.3     |
| GAIF01008549.1 | 194.36  | 51.07  | 74.66   | 507.55 | 746.5  | 4435.69 |
| GAIF01008550.1 | 0.05    | 0      | 0       | 0.17   | 0      | 0       |
| GAIF01008551.1 | 0       | 0.87   | 0       | 0.09   | 0      | 0       |
| GAIF01008553.1 | 0.42    | 0.45   | 0.15    | 4.69   | 15.72  | 0.27    |
| GAIF01008554.1 | 0.12    | 0      | 0       | 0      | 1.57   | 0       |
| GAIF01008555.1 | 1.14    | 0.22   | 0       | 1.58   | 6.4    | 0.45    |
| GAIF01008556.1 | 0       | 0      | 0       | 0      | 0      | 0.19    |
| GAIF01008558.1 | 0       | 0.27   | 0.28    | 0      | 0      | 0       |
| GAIF01008559.1 | 3.58    | 3.76   | 4.9     | 2.63   | 1.97   | 2.98    |
| GAIF01008560.1 | 3.99    | 2.69   | 0.3     | 1.91   | 3.14   | 0       |
| GAIF01008562.1 | 1.07    | 0.74   | 0.06    | 1.52   | 2.93   | 0.06    |
| GAIF01008563.1 | 2.55    | 0.2    | 0.5     | 14.17  | 44.61  | 40.27   |
| GAIF01008565.1 | 0.26    | 0.07   | 0       | 1.11   | 6.54   | 0.28    |
| GAIF01008566.1 | 7.17    | 5.04   | 15.07   | 4.65   | 2.19   | 10.46   |
| GAIF01008568.1 | 0       | 2.3    | 1.81    | 0      | 0.09   | 0       |
| GAIF01008570.1 | 10.94   | 7.71   | 5.43    | 21.91  | 22.69  | 2.93    |
| GAIF01008571.1 | 10.66   | 8.06   | 7.25    | 23.65  | 19.63  | 10.51   |
| GAIF01008572.1 | 0       | 1.1    | 0.52    | 0.63   | 1.94   | 1.88    |
| GAIF01008574.1 | 94.84   | 57.41  | 39.4    | 133.49 | 104.49 | 49.63   |
| GAIF01008576.1 | 0       | 0.34   | 0.29    | 0      | 0      | 0.29    |
| GAIF01008577.1 | 0.21    | 0      | 0       | 0.38   | 2.17   | 0.1     |
| GAIF01008578.1 | 0.27    | 0.03   | 0.07    | 1.21   | 3.6    | 0.4     |
| GAIF01008579.1 | 0.14    | 0      | 0       | 0.15   | 0.17   | 0       |
| GAIF01008580.1 | 0.64    | 0.35   | 0       | 0      | 3.49   | 0       |
| GAIF01008581.1 | 20.07   | 6.34   | 0       | 44.51  | 56.1   | 18.1    |
| GAIF01008582.1 | 1477.39 | 6130.6 | 3981.01 | 80.41  | 200.55 | 136.61  |
| GAIF01008583.1 | 9.46    | 3.07   | 4.07    | 17.62  | 33.83  | 11.73   |
| GAIF01008587.1 | 0.54    | 0.19   | 0.2     | 0.83   | 3.01   | 0.2     |
| GAIF01008588.1 | 0.32    | 0      | 0.09    | 0.09   | 1.06   | 0       |
| GAIF01008589.1 | 0       | 0.88   | 1.12    | 0      | 0.08   | 0.07    |
| GAIF01008591.1 | 1.25    | 0.32   | 0.46    | 9.66   | 2.21   | 0       |
| GAIF01008592.1 | 17.75   | 23.35  | 22.99   | 52.94  | 18.14  | 18.19   |

|                |        |        |        |        |        |        |
|----------------|--------|--------|--------|--------|--------|--------|
| GAIF01008593.1 | 0.45   | 0.35   | 0.41   | 0.57   | 1.32   | 0.35   |
| GAIF01008594.1 | 20.41  | 27.7   | 29.18  | 27.01  | 17.11  | 12.28  |
| GAIF01008595.1 | 0.14   | 0      | 0.23   | 0.24   | 0      | 0.15   |
| GAIF01008596.1 | 0      | 0.13   | 0      | 4.06   | 1.06   | 0.33   |
| GAIF01008597.1 | 0      | 0      | 0      | 0.12   | 0      | 0      |
| GAIF01008598.1 | 0.09   | 0.05   | 0.05   | 0.64   | 0.94   | 0.2    |
| GAIF01008599.1 | 1.28   | 1.73   | 0      | 0.22   | 0.21   | 2.5    |
| GAIF01008600.1 | 0      | 0      | 0      | 0      | 0.04   | 0      |
| GAIF01008601.1 | 0      | 0      | 0      | 0.06   | 0      | 0      |
| GAIF01008604.1 | 1.95   | 1.95   | 2.49   | 0.12   | 0.06   | 0.35   |
| GAIF01008605.1 | 525.7  | 502.35 | 605.87 | 345.34 | 241.59 | 345.99 |
| GAIF01008607.1 | 0      | 0.14   | 0      | 0.29   | 2.86   | 0      |
| GAIF01008609.1 | 1.44   | 3.54   | 1      | 2.38   | 2.46   | 0.04   |
| GAIF01008610.1 | 0      | 0.01   | 0      | 0      | 0      | 0.01   |
| GAIF01008611.1 | 0.32   | 0      | 0      | 0      | 0      | 0      |
| GAIF01008613.1 | 0.15   | 0      | 0.16   | 0      | 0      | 0      |
| GAIF01008614.1 | 0      | 0.08   | 0      | 0      | 0      | 0      |
| GAIF01008616.1 | 9.34   | 4.98   | 0.84   | 16.56  | 16.53  | 2.99   |
| GAIF01008617.1 | 12.35  | 18.38  | 11.51  | 39.22  | 31.42  | 2.64   |
| GAIF01008619.1 | 6.85   | 3.25   | 9.42   | 4.73   | 5.03   | 10.89  |
| GAIF01008620.1 | 11.1   | 9.01   | 12.34  | 24.55  | 18.68  | 23.81  |
| GAIF01008621.1 | 5.42   | 1.44   | 0.36   | 9.82   | 18.92  | 2.84   |
| GAIF01008622.1 | 24     | 10.63  | 14.64  | 31.98  | 17.1   | 23.19  |
| GAIF01008623.1 | 0      | 0.89   | 0      | 0.18   | 0      | 0.9    |
| GAIF01008624.1 | 0.84   | 1.21   | 0.09   | 0.15   | 0.05   | 0      |
| GAIF01008625.1 | 0      | 0.25   | 0      | 0      | 1.84   | 0.22   |
| GAIF01008627.1 | 0.13   | 0.5    | 0      | 0.88   | 1.37   | 0.05   |
| GAIF01008630.1 | 0      | 0      | 0      | 0      | 0.17   | 0      |
| GAIF01008631.1 | 16.55  | 12.67  | 7.95   | 44.65  | 55.24  | 6.16   |
| GAIF01008632.1 | 101.65 | 55.64  | 63.49  | 101.28 | 168.66 | 54.53  |
| GAIF01008633.1 | 1.45   | 0.1    | 0.53   | 5.15   | 11.72  | 1.7    |
| GAIF01008634.1 | 0.4    | 0      | 0      | 1.39   | 3.56   | 0.57   |
| GAIF01008636.1 | 0.31   | 0.23   | 0.34   | 0.16   | 0.12   | 0.27   |
| GAIF01008638.1 | 16.84  | 24.33  | 24.84  | 52.91  | 36.89  | 9.09   |
| GAIF01008643.1 | 0.46   | 0.37   | 0.13   | 1.69   | 8.13   | 0.35   |
| GAIF01008645.1 | 0      | 0.17   | 0.18   | 0      | 0.08   | 0      |
| GAIF01008647.1 | 12.85  | 8.33   | 3.74   | 14.81  | 34.58  | 0.84   |
| GAIF01008649.1 | 6.8    | 1.48   | 0.25   | 6.57   | 23.98  | 18.48  |
| GAIF01008650.1 | 0      | 0      | 0      | 0      | 8.09   | 0      |
| GAIF01008654.1 | 0.09   | 0.17   | 0.03   | 0.18   | 0.33   | 0.03   |
| GAIF01008656.1 | 1.72   | 0.06   | 0.25   | 2.8    | 11.25  | 17.15  |
| GAIF01008657.1 | 329.97 | 279.43 | 261.22 | 394.45 | 217.57 | 61.07  |
| GAIF01008658.1 | 0      | 0      | 0.03   | 0      | 0.03   | 0      |
| GAIF01008659.1 | 1.66   | 0.68   | 0.23   | 2.65   | 4.75   | 0.46   |

|                |         |        |         |         |         |         |
|----------------|---------|--------|---------|---------|---------|---------|
| GAIF01008660.1 | 2.18    | 1.52   | 0.17    | 0.54    | 0.37    | 0.51    |
| GAIF01008661.1 | 0       | 0.04   | 0       | 0       | 0.09    | 0       |
| GAIF01008664.1 | 7.46    | 13.68  | 9.27    | 37.3    | 29.32   | 3.12    |
| GAIF01008665.1 | 0.2     | 0.26   | 0       | 1       | 5.14    | 0.11    |
| GAIF01008666.1 | 0       | 0      | 0       | 0       | 0.11    | 0       |
| GAIF01008667.1 | 3.82    | 2.92   | 0.47    | 29.96   | 33.77   | 0.79    |
| GAIF01008668.1 | 0       | 0.05   | 0       | 0       | 0.22    | 0       |
| GAIF01008670.1 | 0.35    | 0      | 0       | 2.97    | 13.18   | 5.11    |
| GAIF01008673.1 | 3.32    | 0.16   | 0.11    | 11.39   | 41.89   | 2.02    |
| GAIF01008674.1 | 0       | 0.15   | 0.15    | 0.63    | 4.77    | 0.15    |
| GAIF01008676.1 | 6.36    | 1.76   | 2.87    | 0       | 0.37    | 0.87    |
| GAIF01008677.1 | 1.15    | 0.75   | 0.56    | 3.7     | 6.65    | 0.34    |
| GAIF01008678.1 | 6.4     | 7.29   | 8.7     | 7.54    | 15.63   | 7.39    |
| GAIF01008679.1 | 0.03    | 0      | 0       | 0.07    | 0       | 0       |
| GAIF01008680.1 | 75.02   | 36.2   | 4.89    | 114.53  | 212.44  | 10.77   |
| GAIF01008682.1 | 10.9    | 8.28   | 9.84    | 8.58    | 1.82    | 2.46    |
| GAIF01008683.1 | 0.27    | 0      | 0       | 0       | 0       | 0       |
| GAIF01008684.1 | 0       | 1.01   | 0       | 0.6     | 1.01    | 0.29    |
| GAIF01008685.1 | 0.54    | 0.11   | 0       | 0.34    | 1.12    | 0.23    |
| GAIF01008686.1 | 2.28    | 3.52   | 1.79    | 14.17   | 22.13   | 0.73    |
| GAIF01008687.1 | 6.83    | 8.75   | 6.65    | 22.05   | 30.51   | 2.2     |
| GAIF01008688.1 | 0.09    | 0.05   | 0.15    | 0.46    | 1.01    | 0       |
| GAIF01008689.1 | 14.73   | 6.2    | 12.43   | 20.67   | 8.47    | 15.09   |
| GAIF01008691.1 | 0       | 0.35   | 0       | 0       | 0       | 0       |
| GAIF01008693.1 | 0       | 0      | 0       | 0.25    | 1.92    | 0       |
| GAIF01008694.1 | 3.11    | 1.81   | 1.06    | 1.93    | 1.92    | 0.75    |
| GAIF01008695.1 | 0.13    | 0      | 0       | 0.3     | 7.27    | 0.28    |
| GAIF01008696.1 | 0       | 0      | 0       | 0       | 0.13    | 0       |
| GAIF01008697.1 | 5.86    | 0.27   | 0.27    | 4.85    | 0.37    | 0       |
| GAIF01008698.1 | 52.5    | 48.63  | 49.73   | 44.98   | 40.24   | 21.85   |
| GAIF01008699.1 | 5.26    | 6.84   | 2.22    | 15.12   | 22.94   | 0.42    |
| GAIF01008701.1 | 1.78    | 0.75   | 0.87    | 6.9     | 19.18   | 1.2     |
| GAIF01008702.1 | 7.13    | 8.56   | 10.14   | 27.48   | 10.8    | 3.11    |
| GAIF01008703.1 | 1.11    | 0.97   | 0.45    | 6.37    | 20.54   | 1.11    |
| GAIF01008706.1 | 0.09    | 6.02   | 5.89    | 0       | 0       | 0.75    |
| GAIF01008708.1 | 0.15    | 0.21   | 0.05    | 1.02    | 3.56    | 0.05    |
| GAIF01008709.1 | 0       | 0.31   | 0.45    | 0       | 0       | 0       |
| GAIF01008710.1 | 8.03    | 5.76   | 4.33    | 22.51   | 31.73   | 3.67    |
| GAIF01008711.1 | 0.32    | 0.76   | 0.63    | 0.59    | 0.69    | 0       |
| GAIF01008713.1 | 0.33    | 0.65   | 0.15    | 0.93    | 8.18    | 0.15    |
| GAIF01008714.1 | 2683.76 | 2390.7 | 2129.35 | 1774.52 | 1783.93 | 8018.12 |
| GAIF01008716.1 | 0       | 0.19   | 0.58    | 0.62    | 0.23    | 0.39    |
| GAIF01008717.1 | 0       | 0      | 0       | 0.23    | 0.47    | 0.22    |
| GAIF01008718.1 | 0       | 0.2    | 0.41    | 0       | 0       | 0       |

|                |       |       |       |       |       |        |
|----------------|-------|-------|-------|-------|-------|--------|
| GAIF01008719.1 | 0.21  | 0     | 0     | 0.49  | 2.14  | 0.31   |
| GAIF01008720.1 | 0.2   | 0.07  | 0     | 0     | 0.08  | 0      |
| GAIF01008721.1 | 20.07 | 27.07 | 25.54 | 66.01 | 63.09 | 18.6   |
| GAIF01008722.1 | 0     | 2.56  | 0.73  | 0     | 0.04  | 0.16   |
| GAIF01008723.1 | 3.5   | 2.67  | 0     | 6.3   | 12.6  | 5.4    |
| GAIF01008725.1 | 0.06  | 0     | 0     | 0.11  | 0.39  | 0      |
| GAIF01008726.1 | 0.08  | 0.04  | 0.14  | 0     | 0     | 0      |
| GAIF01008727.1 | 0     | 0     | 0.09  | 0     | 0     | 0.2    |
| GAIF01008728.1 | 0.09  | 0     | 0     | 0     | 0.38  | 0      |
| GAIF01008729.1 | 0.28  | 0.2   | 0.24  | 1.66  | 7.1   | 0.49   |
| GAIF01008731.1 | 21.16 | 8.89  | 9.19  | 34.64 | 44    | 17.95  |
| GAIF01008733.1 | 0.06  | 0     | 0     | 0.07  | 0.18  | 0      |
| GAIF01008734.1 | 4.22  | 9.52  | 2.85  | 0.94  | 1.75  | 0      |
| GAIF01008737.1 | 3.25  | 1.22  | 0.74  | 9.5   | 19.01 | 1.79   |
| GAIF01008738.1 | 0     | 0     | 0.18  | 0     | 1.06  | 0      |
| GAIF01008739.1 | 0     | 0.24  | 0     | 0     | 0     | 0      |
| GAIF01008740.1 | 0     | 0.32  | 0.07  | 0     | 0     | 0      |
| GAIF01008741.1 | 6.87  | 4.5   | 1.96  | 14.08 | 23.42 | 1.66   |
| GAIF01008742.1 | 0     | 0     | 0     | 0.22  | 0.3   | 0      |
| GAIF01008743.1 | 0     | 0     | 0     | 0.13  | 1.01  | 0      |
| GAIF01008744.1 | 1.45  | 0     | 0     | 0.37  | 0.52  | 0      |
| GAIF01008746.1 | 29.14 | 10.09 | 1.5   | 40.01 | 66.62 | 1.18   |
| GAIF01008747.1 | 24.43 | 20.28 | 5.54  | 16.98 | 23.17 | 12.21  |
| GAIF01008748.1 | 0.19  | 0.21  | 0     | 1.11  | 1.84  | 0      |
| GAIF01008749.1 | 0.44  | 1.04  | 0     | 0.09  | 0.06  | 1.06   |
| GAIF01008751.1 | 0     | 17.58 | 53.4  | 1.18  | 3.23  | 163.32 |
| GAIF01008752.1 | 0.03  | 0.03  | 0     | 0.23  | 2.2   | 0      |
| GAIF01008753.1 | 0     | 0     | 0     | 0     | 0.28  | 0      |
| GAIF01008754.1 | 0     | 0     | 0     | 0.56  | 0     | 0      |
| GAIF01008755.1 | 0     | 0     | 0.12  | 0     | 0     | 0      |
| GAIF01008756.1 | 0     | 0.19  | 0.39  | 0     | 0     | 0      |
| GAIF01008757.1 | 0.64  | 0.19  | 0.05  | 0.45  | 0     | 0      |
| GAIF01008761.1 | 21.41 | 9.94  | 12.17 | 40.71 | 24.12 | 74.96  |
| GAIF01008762.1 | 0.76  | 0.74  | 0.3   | 0.66  | 0.24  | 0.3    |
| GAIF01008763.1 | 0     | 0.18  | 0     | 0.19  | 0.03  | 0      |
| GAIF01008764.1 | 0     | 0.17  | 0     | 0     | 0     | 0      |
| GAIF01008765.1 | 4.02  | 4.24  | 3.39  | 7.88  | 5.3   | 3.43   |
| GAIF01008766.1 | 12.11 | 6.06  | 7.03  | 43.26 | 70.75 | 76.43  |
| GAIF01008767.1 | 0     | 0     | 0     | 0     | 0.2   | 0.18   |
| GAIF01008769.1 | 8.87  | 3.55  | 3.47  | 14.91 | 17.29 | 24.27  |
| GAIF01008770.1 | 0     | 0     | 0     | 0     | 0.47  | 0      |
| GAIF01008771.1 | 47.75 | 18.44 | 19.42 | 8.44  | 7.71  | 54.26  |
| GAIF01008772.1 | 0     | 0     | 0     | 7.42  | 3.73  | 0      |
| GAIF01008773.1 | 0.11  | 0.11  | 0     | 0     | 0     | 0      |

|                |       |       |       |       |        |       |
|----------------|-------|-------|-------|-------|--------|-------|
| GAIF01008775.1 | 0.11  | 0.11  | 0.07  | 5.02  | 7.5    | 0.53  |
| GAIF01008776.1 | 0     | 0     | 0     | 0     | 0.14   | 0     |
| GAIF01008777.1 | 0     | 0.03  | 0     | 0.04  | 0.09   | 0     |
| GAIF01008780.1 | 6.21  | 2.77  | 1.06  | 3.87  | 1.96   | 0     |
| GAIF01008782.1 | 0.13  | 0     | 0.15  | 0.16  | 0.49   | 0.15  |
| GAIF01008783.1 | 0     | 0.19  | 0     | 0.9   | 4.56   | 2.38  |
| GAIF01008784.1 | 0     | 0     | 0.71  | 0     | 0      | 0     |
| GAIF01008785.1 | 15.56 | 10.55 | 17.63 | 37.16 | 75.67  | 57.03 |
| GAIF01008786.1 | 1.07  | 0.52  | 0.73  | 5.09  | 5.18   | 0     |
| GAIF01008787.1 | 0.46  | 0.18  | 0.37  | 0.61  | 1.96   | 1.03  |
| GAIF01008791.1 | 1.81  | 1.07  | 0.99  | 3.46  | 10.36  | 2.45  |
| GAIF01008792.1 | 1.57  | 0.22  | 0     | 4.45  | 14.79  | 3.07  |
| GAIF01008793.1 | 2.79  | 1.9   | 1     | 3.61  | 5.3    | 6.58  |
| GAIF01008794.1 | 0.05  | 0.05  | 0.1   | 0.99  | 0      | 0     |
| GAIF01008795.1 | 0     | 0     | 0     | 0.08  | 0.18   | 0.08  |
| GAIF01008796.1 | 0.15  | 0.11  | 0.22  | 0.12  | 0.12   | 0.05  |
| GAIF01008797.1 | 0     | 0     | 0     | 0     | 1.23   | 0     |
| GAIF01008799.1 | 0     | 0     | 0     | 0.08  | 0      | 0     |
| GAIF01008801.1 | 0.39  | 0     | 0     | 0     | 0.71   | 0.22  |
| GAIF01008802.1 | 0.01  | 0     | 0     | 0.02  | 0.02   | 0.01  |
| GAIF01008803.1 | 0.14  | 0     | 0.12  | 0     | 1.04   | 0     |
| GAIF01008804.1 | 0.42  | 0     | 0     | 2.92  | 15.23  | 0     |
| GAIF01008805.1 | 1.22  | 0.31  | 0.1   | 2.08  | 6.03   | 0.33  |
| GAIF01008806.1 | 12.55 | 11.37 | 6.96  | 20.34 | 20.91  | 6.05  |
| GAIF01008807.1 | 0     | 0     | 0     | 0     | 0      | 2.38  |
| GAIF01008808.1 | 37.03 | 82.49 | 17.32 | 72.58 | 116.72 | 35.17 |
| GAIF01008810.1 | 3.06  | 4.48  | 1.48  | 16.43 | 20.15  | 7.91  |
| GAIF01008813.1 | 0     | 0     | 0.21  | 0     | 0      | 0     |
| GAIF01008815.1 | 1.95  | 1.11  | 0.23  | 9.65  | 15.6   | 0.1   |
| GAIF01008816.1 | 4.09  | 2.33  | 1.02  | 5.62  | 28.49  | 1.54  |
| GAIF01008817.1 | 0     | 0     | 0     | 0     | 0      | 0.03  |
| GAIF01008818.1 | 20.27 | 20.45 | 14.75 | 34.4  | 53.68  | 4.76  |
| GAIF01008819.1 | 0.17  | 0     | 0     | 2.07  | 0.2    | 0.73  |
| GAIF01008821.1 | 0     | 0     | 0     | 0     | 1.17   | 0     |
| GAIF01008822.1 | 0.19  | 0.1   | 0     | 0.87  | 3.82   | 0     |
| GAIF01008823.1 | 0     | 0     | 0     | 0     | 0.2    | 0     |
| GAIF01008824.1 | 2.32  | 2.86  | 1.01  | 14.91 | 28.02  | 0.47  |
| GAIF01008827.1 | 0.17  | 0     | 0     | 0.19  | 0.5    | 0.18  |
| GAIF01008828.1 | 0.16  | 0.25  | 0     | 0     | 0.54   | 0.09  |
| GAIF01008830.1 | 0.34  | 0.36  | 0     | 0     | 5.81   | 0     |
| GAIF01008831.1 | 13.6  | 4.11  | 0     | 33.08 | 130.04 | 1.82  |
| GAIF01008832.1 | 1.05  | 0     | 0     | 0     | 0      | 0     |
| GAIF01008833.1 | 25.89 | 18.47 | 26.12 | 27.09 | 15.22  | 14.93 |
| GAIF01008834.1 | 3.21  | 14.24 | 6.2   | 3.89  | 4.03   | 0     |



|                |        |        |       |        |        |        |
|----------------|--------|--------|-------|--------|--------|--------|
| GAIF01008835.1 | 0.05   | 0      | 0     | 0      | 0      | 0      |
| GAIF01008836.1 | 1.56   | 0.35   | 0     | 14.59  | 62.38  | 0.65   |
| GAIF01008837.1 | 15.75  | 2.28   | 1.26  | 158.19 | 433.31 | 198.6  |
| GAIF01008839.1 | 0.21   | 0      | 0     | 0      | 0.17   | 0      |
| GAIF01008842.1 | 0      | 0      | 0     | 0      | 0.07   | 0      |
| GAIF01008844.1 | 0.28   | 0      | 0     | 0.23   | 0.05   | 0.04   |
| GAIF01008847.1 | 1.12   | 1.23   | 1.52  | 3.82   | 1.79   | 0.59   |
| GAIF01008848.1 | 0.11   | 0.09   | 0     | 0      | 0      | 0      |
| GAIF01008849.1 | 0.06   | 0.02   | 0     | 0      | 0.03   | 0      |
| GAIF01008850.1 | 0.04   | 0      | 0     | 0      | 0.26   | 0      |
| GAIF01008851.1 | 0.2    | 0.22   | 0.88  | 0      | 0      | 0      |
| GAIF01008852.1 | 0      | 0      | 0     | 0      | 0.18   | 0      |
| GAIF01008853.1 | 0      | 0      | 0     | 2.08   | 1.57   | 0.58   |
| GAIF01008854.1 | 22.76  | 27.11  | 39.68 | 66.38  | 35.35  | 31.14  |
| GAIF01008855.1 | 3.69   | 6.91   | 1.4   | 8.26   | 12.39  | 2.1    |
| GAIF01008856.1 | 0      | 1.1    | 0.5   | 0      | 0      | 0.1    |
| GAIF01008857.1 | 0      | 0      | 0.08  | 0.1    | 0.11   | 0.05   |
| GAIF01008859.1 | 63.68  | 101.15 | 85.4  | 82.37  | 67.76  | 46.61  |
| GAIF01008860.1 | 1.53   | 1.33   | 1.91  | 0.24   | 0.12   | 0.23   |
| GAIF01008861.1 | 0      | 0      | 0     | 0.09   | 0.18   | 0      |
| GAIF01008862.1 | 3.57   | 4.42   | 1.3   | 12.88  | 34.07  | 0.22   |
| GAIF01008864.1 | 20.3   | 15.65  | 13.07 | 16.95  | 4.23   | 3.42   |
| GAIF01008865.1 | 0.32   | 0.1    | 0.1   | 2.15   | 7.69   | 0.25   |
| GAIF01008866.1 | 9.61   | 5.58   | 5.83  | 10.53  | 7.79   | 6.51   |
| GAIF01008868.1 | 19.58  | 19.72  | 29.74 | 45.86  | 42.3   | 17.18  |
| GAIF01008869.1 | 49.24  | 0.81   | 0.1   | 3.67   | 0.45   | 0.62   |
| GAIF01008870.1 | 0.72   | 0.13   | 0     | 3.05   | 15.68  | 0      |
| GAIF01008872.1 | 3.31   | 2.1    | 0.81  | 9.92   | 14.04  | 1.22   |
| GAIF01008873.1 | 51.33  | 53.75  | 15.13 | 11.99  | 17.61  | 0      |
| GAIF01008874.1 | 0      | 0      | 0     | 0.02   | 0.26   | 0      |
| GAIF01008875.1 | 0      | 0      | 0     | 17.01  | 0      | 0.09   |
| GAIF01008877.1 | 2.06   | 1.46   | 0.76  | 4.12   | 8.27   | 0      |
| GAIF01008878.1 | 0.22   | 0.04   | 0.04  | 0.17   | 0.53   | 0.04   |
| GAIF01008881.1 | 8.62   | 16.96  | 9.07  | 19.59  | 16.38  | 2.05   |
| GAIF01008882.1 | 2.19   | 4.48   | 0.78  | 24.28  | 43.71  | 0.12   |
| GAIF01008884.1 | 0      | 0      | 0     | 0      | 0.98   | 0      |
| GAIF01008885.1 | 216.81 | 78.76  | 65.91 | 20.64  | 14.91  | 19.06  |
| GAIF01008886.1 | 5.46   | 13.86  | 8.23  | 17.92  | 11.07  | 1.75   |
| GAIF01008887.1 | 0      | 0      | 0     | 0      | 0.18   | 0      |
| GAIF01008888.1 | 11.16  | 11.27  | 11.7  | 9.53   | 5.54   | 2.62   |
| GAIF01008889.1 | 0      | 0.1    | 0     | 0      | 0      | 0      |
| GAIF01008890.1 | 0.07   | 0      | 0.16  | 0.42   | 2.36   | 0      |
| GAIF01008891.1 | 0.51   | 1.11   | 0.67  | 1.3    | 4.66   | 0.11   |
| GAIF01008892.1 | 87.77  | 128.06 | 207.1 | 61.24  | 56.98  | 128.56 |

|                |        |        |        |         |         |         |
|----------------|--------|--------|--------|---------|---------|---------|
| GAIF01008893.1 | 0.07   | 0      | 0      | 0       | 0       | 0       |
| GAIF01008896.1 | 0.12   | 0      | 0      | 0.11    | 0.07    | 0       |
| GAIF01008897.1 | 0.28   | 0.24   | 0.18   | 0.13    | 0.27    | 0.43    |
| GAIF01008899.1 | 16.01  | 8.68   | 13.14  | 19.69   | 23.93   | 73.86   |
| GAIF01008900.1 | 0.34   | 0.81   | 0.14   | 1.44    | 3.83    | 4.41    |
| GAIF01008901.1 | 22.18  | 12.21  | 7.74   | 6.24    | 8.44    | 3.22    |
| GAIF01008902.1 | 19.68  | 15.53  | 24.22  | 33.02   | 13.56   | 25.69   |
| GAIF01008903.1 | 17.08  | 5.01   | 9.08   | 11.26   | 10.78   | 10.97   |
| GAIF01008904.1 | 11.77  | 9.08   | 11.39  | 28.91   | 30.22   | 37.87   |
| GAIF01008905.1 | 5.31   | 5.25   | 3.41   | 5.56    | 2.85    | 0.75    |
| GAIF01008906.1 | 42.52  | 21.36  | 24.64  | 41.79   | 23.58   | 136.77  |
| GAIF01008907.1 | 27.66  | 43.48  | 45.62  | 46.34   | 39.38   | 17.35   |
| GAIF01008909.1 | 0.29   | 0.11   | 0.11   | 1.63    | 3.74    | 0.39    |
| GAIF01008911.1 | 3.65   | 2.14   | 2.35   | 15.64   | 13.5    | 2.48    |
| GAIF01008912.1 | 0      | 0      | 0      | 0       | 0.26    | 0.24    |
| GAIF01008915.1 | 10.18  | 20.11  | 4.56   | 55.94   | 87.53   | 4.32    |
| GAIF01008916.1 | 1.33   | 0.65   | 0.07   | 5.47    | 20.42   | 0.56    |
| GAIF01008917.1 | 14.34  | 7.08   | 3.4    | 2.91    | 2.85    | 1.04    |
| GAIF01008918.1 | 0.15   | 0      | 0      | 0.54    | 2.55    | 0       |
| GAIF01008919.1 | 0      | 0.17   | 0      | 1.24    | 7.51    | 0       |
| GAIF01008920.1 | 0      | 0      | 0.12   | 0       | 0       | 0       |
| GAIF01008924.1 | 11.75  | 13.16  | 19.74  | 29.05   | 17.71   | 8.86    |
| GAIF01008928.1 | 53.38  | 94.66  | 46.46  | 38.04   | 43.7    | 18.82   |
| GAIF01008929.1 | 21.1   | 16.64  | 17.64  | 17.59   | 23.01   | 9.51    |
| GAIF01008931.1 | 4.83   | 1.97   | 3.06   | 1.26    | 2.18    | 4.64    |
| GAIF01008932.1 | 0      | 0      | 0      | 0.17    | 0       | 0       |
| GAIF01008933.1 | 0.34   | 0.09   | 0      | 0.2     | 3.28    | 0       |
| GAIF01008934.1 | 0.73   | 0.36   | 0.37   | 0.44    | 0.18    | 0       |
| GAIF01008935.1 | 16.57  | 17.43  | 32.16  | 38.71   | 26.37   | 26.38   |
| GAIF01008936.1 | 1.29   | 1.05   | 1.77   | 13.32   | 10.88   | 6.59    |
| GAIF01008937.1 | 712.97 | 122.08 | 165.29 | 1248.29 | 2251.83 | 2551.43 |
| GAIF01008938.1 | 0.43   | 0.15   | 0      | 0       | 0.06    | 0       |
| GAIF01008939.1 | 110.88 | 57.55  | 23.07  | 188     | 128.33  | 6.48    |
| GAIF01008941.1 | 0.03   | 0      | 0      | 0       | 0       | 0.03    |
| GAIF01008943.1 | 0.69   | 0      | 0      | 1.01    | 1.7     | 1.19    |
| GAIF01008945.1 | 0.49   | 0.23   | 0.15   | 2.12    | 12.31   | 0.08    |
| GAIF01008948.1 | 29.31  | 0.64   | 1.36   | 1.31    | 0.19    | 0.12    |
| GAIF01008950.1 | 2.07   | 0.18   | 0      | 3.83    | 7.94    | 14.72   |
| GAIF01008951.1 | 0      | 0      | 0      | 0       | 0.05    | 0       |
| GAIF01008952.1 | 0      | 0      | 0      | 0.5     | 0.59    | 0       |
| GAIF01008953.1 | 89.59  | 41.25  | 22.91  | 17.8    | 23.07   | 51.86   |
| GAIF01008954.1 | 0.64   | 0      | 0      | 0       | 0.31    | 0       |
| GAIF01008955.1 | 13.68  | 22.81  | 13.46  | 32.82   | 35.83   | 6.37    |
| GAIF01008956.1 | 42.93  | 46.09  | 37.06  | 57.07   | 45.45   | 18.04   |

|                |        |        |        |        |        |        |
|----------------|--------|--------|--------|--------|--------|--------|
| GAIF01008957.1 | 1.06   | 1.52   | 1.35   | 6.52   | 2.67   | 1      |
| GAIF01008958.1 | 0.94   | 1.31   | 0.62   | 6.52   | 3.7    | 0.37   |
| GAIF01008959.1 | 0.94   | 0.4    | 0.25   | 4.2    | 11.95  | 0.53   |
| GAIF01008962.1 | 45.84  | 60.36  | 52.09  | 46.4   | 33.71  | 7.31   |
| GAIF01008965.1 | 2.78   | 7.68   | 1.29   | 10.64  | 14.26  | 0.37   |
| GAIF01008966.1 | 0.44   | 1.27   | 0.23   | 2.01   | 0.7    | 0.08   |
| GAIF01008967.1 | 5.36   | 9.15   | 4.44   | 1.53   | 0.5    | 0      |
| GAIF01008968.1 | 5.17   | 2.69   | 0.74   | 0.64   | 0.6    | 0.27   |
| GAIF01008969.1 | 341.02 | 655.95 | 344.42 | 27.42  | 94.33  | 132.74 |
| GAIF01008970.1 | 39.27  | 11.33  | 10.82  | 0.07   | 0.07   | 0.07   |
| GAIF01008971.1 | 71.62  | 54.17  | 41.93  | 148.91 | 140.3  | 11.63  |
| GAIF01008972.1 | 1.46   | 0.53   | 0.27   | 6.41   | 19.25  | 1.34   |
| GAIF01008973.1 | 0      | 0      | 0      | 0.09   | 0.11   | 0.16   |
| GAIF01008975.1 | 1.3    | 1.09   | 0.88   | 0.64   | 1.39   | 0.06   |
| GAIF01008979.1 | 0      | 4.9    | 6.5    | 0      | 0.07   | 0.43   |
| GAIF01008980.1 | 15.93  | 24.01  | 16.15  | 15.57  | 1.03   | 2.4    |
| GAIF01008981.1 | 0.09   | 0.15   | 0      | 0.48   | 1.22   | 0      |
| GAIF01008983.1 | 0.49   | 0.21   | 0.11   | 3.88   | 7.21   | 0.54   |
| GAIF01008985.1 | 0.13   | 0      | 0      | 0.15   | 0.56   | 0.14   |
| GAIF01008986.1 | 19.69  | 3.88   | 2.35   | 1.82   | 1.54   | 2.36   |
| GAIF01008987.1 | 0.49   | 0.11   | 0.19   | 0.88   | 0.57   | 0.04   |
| GAIF01008988.1 | 1.69   | 0.65   | 0      | 1.54   | 2.46   | 3.31   |
| GAIF01008990.1 | 164.83 | 80.85  | 66.11  | 172.48 | 217.63 | 29.57  |
| GAIF01008992.1 | 248.55 | 409.81 | 386.47 | 186.65 | 328.73 | 919.34 |
| GAIF01008993.1 | 0      | 0      | 0.06   | 0.45   | 1      | 0.18   |
| GAIF01008994.1 | 0.03   | 0.1    | 0.03   | 0.22   | 0.57   | 0.03   |
| GAIF01008995.1 | 0      | 0      | 0      | 0      | 0.1    | 0      |
| GAIF01008996.1 | 0      | 0      | 0      | 0      | 1.29   | 0.24   |
| GAIF01008997.1 | 0.05   | 0.19   | 0      | 0      | 0.34   | 0      |
| GAIF01008998.1 | 0.05   | 0.11   | 0      | 0      | 0.12   | 0      |
| GAIF01008999.1 | 0.24   | 0.09   | 0      | 1.74   | 9.76   | 0.09   |
| GAIF01009000.1 | 148.26 | 47.47  | 124.13 | 0      | 0      | 0      |
| GAIF01009001.1 | 0      | 0      | 0      | 0      | 0.03   | 0      |
| GAIF01009002.1 | 0.84   | 0.21   | 0.07   | 1.2    | 8.08   | 0.35   |
| GAIF01009003.1 | 39.77  | 52     | 57.24  | 91.9   | 72.27  | 21.21  |
| GAIF01009005.1 | 1.75   | 8.25   | 3.5    | 13.69  | 7.41   | 1.1    |
| GAIF01009006.1 | 7.8    | 2.71   | 1.26   | 0.38   | 1.11   | 0.44   |
| GAIF01009007.1 | 1.89   | 2.23   | 0.78   | 1.65   | 1.42   | 0.17   |
| GAIF01009008.1 | 0.76   | 0.31   | 0.78   | 2.85   | 11.56  | 4.77   |
| GAIF01009012.1 | 21.8   | 15.72  | 10.97  | 80.42  | 78.8   | 12.78  |
| GAIF01009013.1 | 16.02  | 0      | 0      | 4.68   | 8.41   | 0      |
| GAIF01009014.1 | 0      | 0.15   | 0      | 0.16   | 0.32   | 0      |
| GAIF01009015.1 | 0      | 0      | 0      | 0.27   | 1.21   | 0      |
| GAIF01009016.1 | 0.17   | 0.06   | 0.12   | 2.01   | 6.24   | 0.31   |

|                |         |        |        |        |        |        |
|----------------|---------|--------|--------|--------|--------|--------|
| GAIF01009018.1 | 0.76    | 0.41   | 0.1    | 0.22   | 0.68   | 0      |
| GAIF01009019.1 | 0       | 0      | 0      | 0.14   | 0.38   | 0.05   |
| GAIF01009020.1 | 16.66   | 10.75  | 11.93  | 71.83  | 63.66  | 16.46  |
| GAIF01009024.1 | 51.3    | 6.03   | 7.13   | 95.51  | 159.03 | 160.95 |
| GAIF01009025.1 | 1215.86 | 134.75 | 193.27 | 55.12  | 8.77   | 34.73  |
| GAIF01009026.1 | 3.83    | 6.89   | 2.69   | 3.89   | 2.69   | 0.18   |
| GAIF01009028.1 | 2.44    | 1.3    | 1.27   | 0.8    | 2.27   | 0.41   |
| GAIF01009031.1 | 0.98    | 1.72   | 0.49   | 3.88   | 5.94   | 0.11   |
| GAIF01009033.1 | 0       | 0.07   | 0      | 0      | 0.08   | 0.04   |
| GAIF01009035.1 | 0.83    | 0.48   | 1.36   | 1.89   | 3.89   | 1.41   |
| GAIF01009036.1 | 0       | 0      | 0      | 3.16   | 14.18  | 0      |
| GAIF01009039.1 | 67.27   | 0.44   | 3.59   | 42.72  | 9.84   | 57.01  |
| GAIF01009040.1 | 0.41    | 0      | 0      | 0      | 0.62   | 0      |
| GAIF01009041.1 | 0.05    | 0.05   | 0      | 0.12   | 0      | 0      |
| GAIF01009042.1 | 0       | 0      | 0      | 0.11   | 0.76   | 0      |
| GAIF01009043.1 | 0.13    | 0.07   | 0.07   | 0.31   | 2.73   | 0.07   |
| GAIF01009045.1 | 18.92   | 40.08  | 27.79  | 53.75  | 62.87  | 8.79   |
| GAIF01009046.1 | 0       | 0.34   | 0      | 0.41   | 0.52   | 0      |
| GAIF01009047.1 | 508.75  | 296.54 | 523.98 | 426.09 | 69.38  | 63.58  |
| GAIF01009049.1 | 32.85   | 23.56  | 21.69  | 53.16  | 33.7   | 15.54  |
| GAIF01009050.1 | 1.05    | 0.3    | 0.1    | 2.93   | 10.8   | 6.82   |
| GAIF01009051.1 | 9.77    | 11.57  | 5.38   | 43.86  | 43.12  | 2.46   |
| GAIF01009052.1 | 0       | 0      | 0      | 0      | 1.1    | 0      |
| GAIF01009053.1 | 0       | 0.08   | 0.55   | 0.02   | 0      | 0      |
| GAIF01009054.1 | 0       | 0      | 0.34   | 0      | 0      | 0      |
| GAIF01009055.1 | 25.45   | 20.12  | 14.54  | 7.23   | 7.05   | 2      |
| GAIF01009056.1 | 0       | 0      | 0      | 0      | 0.22   | 0      |
| GAIF01009057.1 | 5       | 2.74   | 2.81   | 14.2   | 15.13  | 8.15   |
| GAIF01009058.1 | 14.12   | 2.33   | 1.74   | 27.34  | 73.77  | 45.4   |
| GAIF01009060.1 | 0.98    | 0.4    | 0.64   | 0.41   | 0.53   | 0      |
| GAIF01009061.1 | 5.24    | 0      | 0      | 2.78   | 0      | 5.49   |
| GAIF01009062.1 | 14.51   | 5.89   | 1.4    | 31.4   | 16.52  | 18.96  |
| GAIF01009063.1 | 4.52    | 5.19   | 5.04   | 11.51  | 18.3   | 8.87   |
| GAIF01009065.1 | 38.6    | 41.86  | 51.49  | 47.93  | 31.51  | 28.87  |
| GAIF01009066.1 | 55.85   | 10.18  | 36.19  | 26.81  | 9.34   | 23.31  |
| GAIF01009067.1 | 0.18    | 0.73   | 0      | 2.15   | 7.05   | 0      |
| GAIF01009069.1 | 0       | 0.13   | 0.13   | 0      | 0      | 0.27   |
| GAIF01009070.1 | 0.54    | 0.12   | 1      | 0.2    | 0      | 0.35   |
| GAIF01009071.1 | 19.28   | 20.69  | 21.46  | 18.58  | 12.62  | 36.98  |
| GAIF01009072.1 | 0       | 0      | 0      | 0.05   | 0.05   | 0      |
| GAIF01009073.1 | 0.03    | 0.04   | 0.04   | 0.11   | 0.2    | 0.07   |
| GAIF01009074.1 | 0.12    | 0      | 0      | 0.29   | 0.68   | 0      |
| GAIF01009075.1 | 0.18    | 0.2    | 0.2    | 0.95   | 2.74   | 0.2    |
| GAIF01009076.1 | 0       | 0      | 0      | 1.09   | 5.19   | 0      |

|                |        |        |        |        |        |        |
|----------------|--------|--------|--------|--------|--------|--------|
| GAIF01009077.1 | 0      | 0      | 0      | 0      | 0.14   | 0      |
| GAIF01009078.1 | 0      | 0      | 0      | 0.18   | 0.26   | 0      |
| GAIF01009081.1 | 0      | 0      | 0.14   | 0.15   | 0.05   | 0.05   |
| GAIF01009083.1 | 0      | 0      | 0.32   | 0      | 0      | 0      |
| GAIF01009085.1 | 0.29   | 0      | 0      | 0.18   | 3      | 0.19   |
| GAIF01009086.1 | 309.93 | 245.94 | 202.13 | 388.96 | 274.84 | 56.84  |
| GAIF01009087.1 | 0.72   | 0      | 0      | 0      | 0      | 0      |
| GAIF01009088.1 | 9.91   | 0.44   | 1.04   | 8.19   | 23.5   | 128.91 |
| GAIF01009089.1 | 0.33   | 0      | 0      | 1.06   | 2.42   | 0.85   |
| GAIF01009090.1 | 115.41 | 25.32  | 105.57 | 73.97  | 33.14  | 102.17 |
| GAIF01009092.1 | 0.98   | 1.5    | 0.39   | 5.49   | 17.26  | 0.15   |
| GAIF01009095.1 | 0      | 0.11   | 0.12   | 0.18   | 0.45   | 0.04   |
| GAIF01009100.1 | 0      | 0      | 0      | 0      | 0.12   | 0      |
| GAIF01009101.1 | 0      | 0      | 0      | 0.27   | 1.6    | 0.13   |
| GAIF01009102.1 | 0      | 0.1    | 0      | 0      | 1.35   | 0      |
| GAIF01009103.1 | 0.08   | 0.18   | 0.08   | 0.75   | 0.72   | 0      |
| GAIF01009104.1 | 5.54   | 10     | 7.9    | 13.12  | 7.55   | 4.09   |
| GAIF01009105.1 | 0.04   | 0.07   | 0.07   | 0.31   | 0      | 0      |
| GAIF01009106.1 | 19.74  | 28.35  | 9.05   | 32.52  | 32.9   | 4.58   |
| GAIF01009108.1 | 0      | 0.38   | 0.08   | 0.16   | 0      | 0.16   |
| GAIF01009109.1 | 0      | 0      | 0.06   | 0.11   | 0.15   | 0      |
| GAIF01009110.1 | 0.79   | 0      | 0      | 0      | 1.22   | 0      |
| GAIF01009112.1 | 0      | 0.03   | 0.06   | 0      | 0.22   | 0      |
| GAIF01009114.1 | 0      | 0      | 0      | 0      | 0.2    | 0      |
| GAIF01009115.1 | 14.09  | 19.63  | 14.41  | 37.49  | 44.94  | 7.26   |
| GAIF01009116.1 | 1.19   | 0      | 0      | 2.46   | 9.25   | 1.61   |
| GAIF01009118.1 | 11.96  | 8.23   | 8.15   | 5.24   | 7.72   | 5.84   |
| GAIF01009120.1 | 11.42  | 3.12   | 0.82   | 40.2   | 64.24  | 10.39  |
| GAIF01009121.1 | 24.76  | 49.23  | 52.5   | 40.95  | 23.52  | 13.12  |
| GAIF01009123.1 | 0.96   | 0.3    | 0.2    | 1.54   | 7.05   | 0.1    |
| GAIF01009124.1 | 1.56   | 0.42   | 0.57   | 5.13   | 17.51  | 2.44   |
| GAIF01009125.1 | 16.25  | 27.81  | 18.37  | 50.63  | 40.72  | 6.31   |
| GAIF01009126.1 | 16.68  | 9.75   | 2.45   | 10.28  | 0.56   | 0      |
| GAIF01009127.1 | 4.37   | 2.38   | 0      | 2.54   | 7.88   | 0      |
| GAIF01009128.1 | 4.65   | 5.79   | 5.23   | 14.78  | 9.63   | 3.49   |
| GAIF01009130.1 | 0      | 0      | 0      | 0      | 0.22   | 0      |
| GAIF01009131.1 | 0.1    | 0.06   | 0      | 0      | 1.39   | 0.32   |
| GAIF01009132.1 | 3.86   | 5.58   | 4.4    | 3.24   | 4.33   | 5.07   |
| GAIF01009133.1 | 0      | 23.16  | 0      | 12.37  | 40.44  | 0      |
| GAIF01009134.1 | 4.84   | 10.67  | 2.11   | 2.72   | 1.28   | 0.39   |
| GAIF01009136.1 | 42.58  | 23.76  | 18.32  | 87.15  | 87.32  | 25.03  |
| GAIF01009137.1 | 0      | 0      | 0.35   | 0.38   | 1.55   | 0      |
| GAIF01009139.1 | 0.1    | 0      | 0      | 0.08   | 1.19   | 0.1    |
| GAIF01009140.1 | 3.42   | 3.21   | 2.48   | 6.45   | 12.19  | 2.11   |

|                |        |       |       |        |        |        |
|----------------|--------|-------|-------|--------|--------|--------|
| GAIF01009142.1 | 2.12   | 0     | 8     | 3.85   | 0      | 0      |
| GAIF01009143.1 | 60.93  | 65.31 | 55.39 | 30.72  | 15.2   | 6.79   |
| GAIF01009145.1 | 12     | 9.79  | 9.88  | 50.14  | 44.37  | 6.72   |
| GAIF01009146.1 | 0.47   | 0.12  | 0     | 1.73   | 5      | 0      |
| GAIF01009147.1 | 0.43   | 0.24  | 0.12  | 0.63   | 0.13   | 0.36   |
| GAIF01009148.1 | 0.02   | 0.01  | 0     | 0.03   | 0.12   | 0      |
| GAIF01009149.1 | 3.4    | 2.71  | 4.19  | 13.72  | 4.61   | 1.47   |
| GAIF01009150.1 | 0.54   | 0     | 0     | 0.6    | 2.81   | 0      |
| GAIF01009151.1 | 0      | 0.12  | 0     | 0.32   | 0.4    | 0      |
| GAIF01009152.1 | 0      | 0     | 0     | 0.03   | 0      | 0      |
| GAIF01009153.1 | 8.43   | 23.57 | 6.9   | 21.11  | 22.4   | 2.69   |
| GAIF01009154.1 | 0.17   | 0.18  | 0.18  | 2.34   | 0.2    | 0.18   |
| GAIF01009155.1 | 65.66  | 32.02 | 13.62 | 111.17 | 100.03 | 21.28  |
| GAIF01009156.1 | 0.23   | 0     | 0     | 0      | 0      | 0      |
| GAIF01009157.1 | 0.09   | 0     | 0.1   | 0.05   | 0      | 0      |
| GAIF01009158.1 | 0.48   | 0.3   | 0     | 0.95   | 1.57   | 0      |
| GAIF01009159.1 | 0      | 0     | 0     | 0      | 0.73   | 0.17   |
| GAIF01009162.1 | 0.16   | 0.28  | 0.18  | 5.85   | 28.79  | 2.6    |
| GAIF01009164.1 | 57.67  | 13.05 | 3.08  | 39.43  | 121.09 | 546.06 |
| GAIF01009165.1 | 0.48   | 0.36  | 0.23  | 0.29   | 2.86   | 0.03   |
| GAIF01009167.1 | 0.29   | 0.63  | 0     | 1.56   | 0.81   | 1.17   |
| GAIF01009168.1 | 0.09   | 0.11  | 0.11  | 0.28   | 2.78   | 0.01   |
| GAIF01009169.1 | 0.51   | 0.48  | 0.15  | 0.59   | 0.81   | 0      |
| GAIF01009171.1 | 3.39   | 4.78  | 4.12  | 2.13   | 1.54   | 0.5    |
| GAIF01009172.1 | 0.05   | 0     | 0.05  | 0.39   | 1.93   | 0.21   |
| GAIF01009173.1 | 0.14   | 0.15  | 0     | 0      | 0      | 0.15   |
| GAIF01009174.1 | 2.95   | 2.42  | 2.61  | 7.36   | 4.72   | 4.9    |
| GAIF01009177.1 | 2.8    | 0.54  | 0.72  | 2.48   | 0.2    | 0.18   |
| GAIF01009178.1 | 0.73   | 1.16  | 0.42  | 3.42   | 9.04   | 0.57   |
| GAIF01009179.1 | 1.6    | 1.07  | 0     | 3.46   | 3.01   | 0.53   |
| GAIF01009180.1 | 0      | 0     | 0.09  | 0      | 0.21   | 0.14   |
| GAIF01009181.1 | 0.24   | 0.14  | 0.12  | 0.12   | 0      | 0      |
| GAIF01009182.1 | 0.9    | 1.25  | 0     | 0.38   | 0      | 0      |
| GAIF01009183.1 | 11.81  | 7.16  | 3.33  | 44.58  | 54.91  | 3.51   |
| GAIF01009186.1 | 0      | 0.06  | 0     | 0.32   | 3.41   | 0      |
| GAIF01009187.1 | 0      | 0     | 0     | 0.09   | 0.09   | 0      |
| GAIF01009188.1 | 2.69   | 2.7   | 0.64  | 7.58   | 27.38  | 0      |
| GAIF01009189.1 | 164.55 | 64.8  | 7.19  | 216.24 | 264.64 | 3.83   |
| GAIF01009190.1 | 0.1    | 0.11  | 0     | 0      | 0.7    | 0      |
| GAIF01009191.1 | 12.2   | 10.92 | 9.77  | 44.63  | 59.02  | 8.54   |
| GAIF01009192.1 | 2.53   | 3.5   | 1.39  | 5.2    | 9.81   | 1.39   |
| GAIF01009193.1 | 0      | 0     | 0     | 0.01   | 0.01   | 0      |
| GAIF01009194.1 | 0.17   | 0.07  | 0.07  | 1.06   | 2.48   | 0.04   |
| GAIF01009197.1 | 0      | 0     | 0.41  | 1.41   | 0.77   | 0.3    |

|                |        |        |        |         |        |        |
|----------------|--------|--------|--------|---------|--------|--------|
| GAIF01009198.1 | 2.61   | 1.81   | 3.11   | 3.67    | 10.74  | 2.08   |
| GAIF01009199.1 | 15.78  | 5.48   | 6.5    | 27.47   | 37.17  | 30.64  |
| GAIF01009200.1 | 0.02   | 0.07   | 0      | 0       | 0.05   | 0.02   |
| GAIF01009201.1 | 0      | 0      | 0.13   | 0       | 0      | 0      |
| GAIF01009202.1 | 0      | 0      | 0      | 0.23    | 0      | 0.04   |
| GAIF01009203.1 | 0      | 0      | 0      | 0.09    | 0.73   | 0      |
| GAIF01009204.1 | 6.77   | 10.56  | 9.4    | 26.61   | 33.21  | 4.82   |
| GAIF01009205.1 | 0      | 0      | 0      | 1.04    | 1.07   | 0.4    |
| GAIF01009206.1 | 0      | 0      | 0      | 0       | 0.05   | 0      |
| GAIF01009207.1 | 0      | 2.5    | 0      | 0       | 2.63   | 0      |
| GAIF01009208.1 | 0      | 0      | 0      | 0.14    | 0.58   | 0      |
| GAIF01009210.1 | 0      | 0      | 0      | 0       | 0.14   | 0      |
| GAIF01009212.1 | 1.12   | 3      | 1.9    | 9.43    | 9.82   | 0.65   |
| GAIF01009213.1 | 11.24  | 0      | 12.34  | 26.09   | 4.51   | 33.01  |
| GAIF01009215.1 | 4.59   | 8.55   | 7.6    | 0.87    | 0.23   | 0.1    |
| GAIF01009216.1 | 0.01   | 0.03   | 0      | 0.03    | 0.07   | 0      |
| GAIF01009217.1 | 0.41   | 0      | 0      | 2.55    | 10.18  | 0.18   |
| GAIF01009218.1 | 0      | 0      | 0      | 0       | 0.39   | 0      |
| GAIF01009220.1 | 0      | 0      | 0      | 0       | 0.49   | 0      |
| GAIF01009224.1 | 63.29  | 34.61  | 78.76  | 60.23   | 25.72  | 19.36  |
| GAIF01009225.1 | 528.93 | 298.75 | 158.89 | 1074.73 | 873.54 | 129.88 |
| GAIF01009226.1 | 0.15   | 0.33   | 0      | 0.35    | 3.38   | 0      |
| GAIF01009227.1 | 62.04  | 36.13  | 17.99  | 55.86   | 75.44  | 140.8  |
| GAIF01009229.1 | 0.03   | 0      | 0      | 0.35    | 1.89   | 0      |
| GAIF01009230.1 | 3.4    | 3.43   | 1.8    | 16.07   | 9.01   | 0.95   |
| GAIF01009233.1 | 0.79   | 0.43   | 0.29   | 2.13    | 4.42   | 0.87   |
| GAIF01009234.1 | 0.1    | 0      | 0      | 0.33    | 0.48   | 0.05   |
| GAIF01009235.1 | 33.04  | 56.46  | 27.09  | 42.91   | 54.8   | 18.78  |
| GAIF01009237.1 | 7.54   | 6.41   | 4.06   | 2.39    | 1.15   | 2.27   |
| GAIF01009238.1 | 0.25   | 0.09   | 0.09   | 0.1     | 0      | 0      |
| GAIF01009241.1 | 0      | 0.01   | 0      | 0       | 0      | 0      |
| GAIF01009242.1 | 0      | 2.86   | 3.03   | 0       | 0      | 0.87   |
| GAIF01009243.1 | 26.77  | 51.05  | 50     | 31.02   | 29.58  | 13.4   |
| GAIF01009244.1 | 9.54   | 11.72  | 3.2    | 36.98   | 38.3   | 1.6    |
| GAIF01009246.1 | 79.05  | 73.34  | 257.66 | 69.33   | 40.67  | 212.93 |
| GAIF01009247.1 | 0.24   | 0.05   | 0.02   | 0.65    | 1.15   | 0.02   |
| GAIF01009248.1 | 0.05   | 0      | 0.03   | 0       | 0.13   | 0      |
| GAIF01009252.1 | 21.41  | 18.86  | 32.82  | 36.65   | 14.76  | 18.77  |
| GAIF01009254.1 | 0.37   | 0.14   | 0.54   | 1.75    | 1.82   | 0.36   |
| GAIF01009255.1 | 0      | 0.1    | 0      | 0.83    | 5.14   | 0      |
| GAIF01009256.1 | 0.85   | 0      | 0      | 0.71    | 0.58   | 0      |
| GAIF01009257.1 | 0      | 0      | 0      | 0       | 0.25   | 0      |
| GAIF01009258.1 | 18.8   | 11.64  | 10.73  | 1.01    | 0.35   | 0.32   |
| GAIF01009259.1 | 0      | 0      | 0      | 0       | 0.24   | 0      |

|                |        |        |        |        |        |        |
|----------------|--------|--------|--------|--------|--------|--------|
| GAIF01009260.1 | 724.39 | 419.73 | 182    | 293.35 | 198.45 | 41.22  |
| GAIF01009261.1 | 84.66  | 22.37  | 11.66  | 18.87  | 22.53  | 0      |
| GAIF01009265.1 | 0.14   | 0      | 0      | 0      | 0.17   | 0.31   |
| GAIF01009266.1 | 3.34   | 2.32   | 3.05   | 10.78  | 11.85  | 1.3    |
| GAIF01009267.1 | 1.87   | 0.11   | 0.11   | 10.4   | 24.16  | 44.61  |
| GAIF01009269.1 | 5.77   | 4.43   | 7.26   | 13.68  | 20.6   | 3.64   |
| GAIF01009270.1 | 800.53 | 577.92 | 491.62 | 0.5    | 2.08   | 1.36   |
| GAIF01009271.1 | 0.89   | 0.2    | 0.38   | 0      | 0.27   | 0      |
| GAIF01009272.1 | 25.18  | 18.1   | 12.97  | 54.95  | 69.42  | 5.92   |
| GAIF01009274.1 | 0      | 0      | 0.2    | 0.21   | 1.59   | 0.1    |
| GAIF01009275.1 | 0.3    | 0      | 0      | 1.64   | 3.72   | 0      |
| GAIF01009277.1 | 0      | 0.02   | 0      | 0.14   | 0.67   | 0      |
| GAIF01009279.1 | 11.87  | 15     | 9.63   | 19.3   | 0      | 3.81   |
| GAIF01009281.1 | 0.29   | 0.27   | 0.4    | 0.19   | 0.15   | 0.09   |
| GAIF01009282.1 | 0      | 0      | 0      | 0      | 0.36   | 0      |
| GAIF01009283.1 | 3.43   | 2.83   | 0      | 6.1    | 5.8    | 0      |
| GAIF01009286.1 | 23.44  | 10.89  | 11.14  | 48.96  | 75.6   | 155.46 |
| GAIF01009288.1 | 1.89   | 3.02   | 4.21   | 0.7    | 0.29   | 0      |
| GAIF01009290.1 | 0.18   | 0      | 0      | 0.29   | 1.75   | 0.26   |
| GAIF01009291.1 | 0      | 0      | 0      | 0      | 16.64  | 0      |
| GAIF01009292.1 | 7.91   | 8.55   | 10.27  | 35.75  | 18.04  | 4.99   |
| GAIF01009293.1 | 1.54   | 0.65   | 0.26   | 2.34   | 20.43  | 0.79   |
| GAIF01009294.1 | 105.04 | 122.38 | 65.81  | 17.39  | 0      | 0      |
| GAIF01009296.1 | 0.09   | 0      | 0      | 0.28   | 1.43   | 0.07   |
| GAIF01009298.1 | 1.26   | 0.64   | 0.09   | 3.11   | 6.44   | 0.09   |
| GAIF01009300.1 | 0      | 4.6    | 2.91   | 0      | 0      | 0      |
| GAIF01009301.1 | 0.21   | 0.15   | 0      | 0.08   | 0.17   | 0      |
| GAIF01009302.1 | 4.79   | 2.28   | 1.99   | 0.35   | 0.31   | 0      |
| GAIF01009303.1 | 0      | 0      | 0      | 0      | 0.07   | 0      |
| GAIF01009304.1 | 0      | 0      | 0      | 0      | 0.72   | 0      |
| GAIF01009306.1 | 0      | 0      | 0.04   | 0.04   | 0.09   | 0      |
| GAIF01009307.1 | 0.43   | 0.23   | 0.89   | 0.59   | 0.36   | 0.37   |
| GAIF01009308.1 | 0.98   | 0      | 0      | 0      | 0      | 0      |
| GAIF01009309.1 | 24.5   | 35.38  | 32.37  | 73.37  | 56.02  | 9.94   |
| GAIF01009310.1 | 0.2    | 0      | 0      | 0      | 1.58   | 0      |
| GAIF01009311.1 | 0      | 0      | 0      | 0      | 0.38   | 0      |
| GAIF01009312.1 | 0      | 0.04   | 0      | 0.13   | 0.7    | 0      |
| GAIF01009313.1 | 0.14   | 0      | 0      | 0.23   | 2.76   | 0      |
| GAIF01009314.1 | 0      | 0      | 0      | 0      | 0.15   | 0      |
| GAIF01009315.1 | 15.65  | 11.06  | 18.44  | 7.97   | 3.05   | 15.9   |
| GAIF01009316.1 | 0      | 0      | 0.16   | 0      | 0      | 0      |
| GAIF01009317.1 | 3.99   | 4.62   | 1.27   | 3.44   | 2.32   | 1.84   |
| GAIF01009318.1 | 0      | 0.13   | 0      | 0.26   | 0      | 0      |
| GAIF01009319.1 | 0.02   | 0.02   | 0      | 0      | 0      | 0      |



|                |         |         |         |         |        |         |
|----------------|---------|---------|---------|---------|--------|---------|
| GAIF01009320.1 | 0       | 0       | 0       | 0.37    | 0.63   | 1.11    |
| GAIF01009321.1 | 0.1     | 0.42    | 0.34    | 0.4     | 0.75   | 0.18    |
| GAIF01009324.1 | 25.72   | 40.2    | 26.42   | 54.99   | 69.84  | 14.17   |
| GAIF01009325.1 | 10.88   | 7.06    | 3.72    | 9.49    | 9.44   | 4.93    |
| GAIF01009327.1 | 0.34    | 0.06    | 0.22    | 1.18    | 3.05   | 0.12    |
| GAIF01009328.1 | 0       | 0       | 2.81    | 0.37    | 0.11   | 0       |
| GAIF01009329.1 | 13.6    | 2.93    | 1.26    | 5.73    | 9.43   | 2.69    |
| GAIF01009330.1 | 0       | 0       | 0       | 0       | 1.96   | 0       |
| GAIF01009331.1 | 0       | 0.1     | 0       | 0       | 0      | 0       |
| GAIF01009332.1 | 0       | 1.6     | 1.94    | 0.09    | 0.09   | 0.81    |
| GAIF01009333.1 | 528.19  | 356.25  | 30.28   | 397.86  | 439.91 | 162.02  |
| GAIF01009334.1 | 13.44   | 10.94   | 4       | 20.99   | 21.67  | 3.96    |
| GAIF01009335.1 | 3.49    | 10.07   | 25.29   | 0       | 0.2    | 11.62   |
| GAIF01009336.1 | 0.3     | 1.13    | 0.65    | 3.26    | 4.8    | 0       |
| GAIF01009337.1 | 0       | 0       | 0.05    | 0       | 0      | 0.11    |
| GAIF01009338.1 | 0.63    | 0.11    | 0.81    | 0.12    | 0.13   | 0.12    |
| GAIF01009339.1 | 33.43   | 69.22   | 89.27   | 25.57   | 23.86  | 18.93   |
| GAIF01009340.1 | 3087.59 | 2082.44 | 4946.84 | 1011.42 | 492.95 | 2848.51 |
| GAIF01009341.1 | 0       | 0       | 0       | 0       | 0.15   | 0       |
| GAIF01009342.1 | 0.19    | 0       | 0.26    | 0.16    | 0.19   | 0.11    |
| GAIF01009343.1 | 0.13    | 0       | 0.23    | 0.31    | 0      | 0       |
| GAIF01009345.1 | 0       | 0       | 0       | 0       | 0.13   | 0       |
| GAIF01009346.1 | 4.34    | 3.78    | 7.55    | 12.75   | 14.62  | 8.32    |
| GAIF01009347.1 | 0       | 0       | 0       | 1.12    | 3.91   | 0       |
| GAIF01009348.1 | 7.52    | 7.24    | 15.01   | 18.86   | 15.33  | 9.78    |
| GAIF01009349.1 | 0       | 5.71    | 1.72    | 0       | 0.05   | 0.09    |
| GAIF01009350.1 | 0       | 0.1     | 0       | 0       | 0      | 0       |
| GAIF01009351.1 | 0       | 0       | 0       | 0.35    | 2.87   | 0       |
| GAIF01009352.1 | 0       | 0.08    | 0.08    | 1.26    | 3.23   | 0.15    |
| GAIF01009353.1 | 5.66    | 4.23    | 5.34    | 2.09    | 0.66   | 1.96    |
| GAIF01009354.1 | 0.74    | 0.16    | 0       | 5.03    | 12.02  | 0.57    |
| GAIF01009355.1 | 0.71    | 0.39    | 0       | 2.47    | 5.34   | 0.2     |
| GAIF01009356.1 | 3.73    | 4.89    | 2.67    | 9.91    | 17.52  | 1.32    |
| GAIF01009357.1 | 0       | 0       | 0       | 0.04    | 0.1    | 0       |
| GAIF01009358.1 | 37.92   | 55.61   | 37      | 77.99   | 189.6  | 9.89    |
| GAIF01009359.1 | 85.29   | 82.71   | 62.36   | 36.61   | 27.24  | 13.4    |
| GAIF01009360.1 | 0       | 0       | 0       | 0.77    | 1.81   | 0.49    |
| GAIF01009361.1 | 0       | 0       | 0       | 0       | 4.3    | 0       |
| GAIF01009363.1 | 3.26    | 3.89    | 4.07    | 4.91    | 4.38   | 2.87    |
| GAIF01009364.1 | 0       | 0       | 0       | 0       | 0.15   | 0       |
| GAIF01009365.1 | 6.87    | 0       | 3.69    | 24.62   | 43.35  | 3.45    |
| GAIF01009366.1 | 1.6     | 0.57    | 1.76    | 0.95    | 1.67   | 1.12    |
| GAIF01009369.1 | 15.52   | 6.32    | 2.36    | 2.32    | 1.93   | 0.99    |
| GAIF01009372.1 | 0       | 0       | 0       | 0.03    | 0      | 0       |

|                |         |         |         |         |         |         |
|----------------|---------|---------|---------|---------|---------|---------|
| GAIF01009373.1 | 0.89    | 3.57    | 0       | 0       | 0       | 0       |
| GAIF01009374.1 | 4.39    | 5.05    | 7.67    | 15.55   | 8.44    | 3.46    |
| GAIF01009375.1 | 55.16   | 113.91  | 63.97   | 64.47   | 101.45  | 34.42   |
| GAIF01009376.1 | 0.18    | 0       | 0       | 0.76    | 3.29    | 0.6     |
| GAIF01009380.1 | 0       | 0.03    | 0       | 0       | 0.18    | 0.03    |
| GAIF01009383.1 | 0.08    | 0       | 0       | 0       | 0.16    | 0       |
| GAIF01009384.1 | 0.14    | 0.08    | 0.16    | 0.25    | 0.17    | 0.08    |
| GAIF01009385.1 | 2977.21 | 1765.98 | 1875.54 | 1699.31 | 1490.65 | 4633.11 |
| GAIF01009386.1 | 0       | 0.19    | 0.32    | 0.24    | 0.14    | 0.1     |
| GAIF01009387.1 | 0.6     | 0.46    | 0.75    | 2.38    | 1.13    | 2.63    |
| GAIF01009389.1 | 0.69    | 1.31    | 0.85    | 3.24    | 8.72    | 1.13    |
| GAIF01009390.1 | 4.77    | 5.19    | 4.56    | 4       | 1.94    | 1.46    |
| GAIF01009392.1 | 26.42   | 25.02   | 37.22   | 56.7    | 41.99   | 26.48   |
| GAIF01009393.1 | 20.82   | 22.27   | 24.97   | 34.01   | 22.05   | 19.33   |
| GAIF01009394.1 | 0       | 0       | 0       | 0       | 0.05    | 0       |
| GAIF01009396.1 | 0.21    | 0       | 0       | 0       | 0       | 0       |
| GAIF01009397.1 | 0.14    | 0.07    | 0.07    | 0       | 0.03    | 0       |
| GAIF01009398.1 | 0.25    | 0       | 0       | 5.81    | 10.93   | 0       |
| GAIF01009399.1 | 0       | 17.29   | 0       | 0       | 0       | 0       |
| GAIF01009401.1 | 0       | 0.15    | 0       | 0.47    | 1.15    | 0       |
| GAIF01009402.1 | 0.08    | 0       | 0       | 0       | 0.46    | 0       |
| GAIF01009403.1 | 0       | 0.01    | 0       | 0.01    | 0.09    | 0       |
| GAIF01009405.1 | 0       | 0       | 0       | 0.08    | 0.16    | 0       |
| GAIF01009406.1 | 14.47   | 21.15   | 24.44   | 40.47   | 27.7    | 11.38   |
| GAIF01009407.1 | 14.62   | 10.93   | 12.91   | 29.82   | 19.76   | 7.44    |
| GAIF01009408.1 | 0.21    | 0.05    | 0.05    | 0.05    | 0       | 0       |
| GAIF01009409.1 | 0.33    | 0.08    | 0       | 2.24    | 2.59    | 0.02    |
| GAIF01009411.1 | 0.11    | 0       | 0       | 0.04    | 0.41    | 0       |
| GAIF01009412.1 | 1.12    | 0.1     | 0.31    | 5.54    | 29.82   | 0.62    |
| GAIF01009413.1 | 0.03    | 0.18    | 0.19    | 0.39    | 0.45    | 0       |
| GAIF01009415.1 | 74.74   | 51.66   | 35.99   | 235.5   | 332.9   | 29.24   |
| GAIF01009416.1 | 21.8    | 13.86   | 31.34   | 54.88   | 29.89   | 74.73   |
| GAIF01009417.1 | 14.23   | 9.7     | 6.11    | 7.66    | 5.91    | 1       |
| GAIF01009418.1 | 0       | 0.18    | 0       | 0.53    | 3.28    | 0       |
| GAIF01009420.1 | 0       | 0       | 0       | 2.93    | 6.15    | 0       |
| GAIF01009421.1 | 0       | 0       | 0       | 0       | 0.34    | 0       |
| GAIF01009425.1 | 0.32    | 0.87    | 0       | 0.19    | 0.19    | 0.53    |
| GAIF01009427.1 | 17.85   | 12.13   | 12.39   | 73.77   | 107.25  | 48.61   |
| GAIF01009428.1 | 0       | 0       | 0       | 0.02    | 0.06    | 0       |
| GAIF01009429.1 | 0       | 0       | 0       | 0.06    | 0.03    | 0.03    |
| GAIF01009431.1 | 0       | 0       | 0.05    | 0       | 0       | 0       |
| GAIF01009433.1 | 0       | 0       | 0       | 0.09    | 0       | 0       |
| GAIF01009434.1 | 0       | 0       | 0       | 0       | 0.03    | 0       |
| GAIF01009436.1 | 1.34    | 0       | 0       | 4.74    | 20.98   | 3.16    |

|                |        |        |        |        |        |        |
|----------------|--------|--------|--------|--------|--------|--------|
| GAIF01009437.1 | 1.44   | 1.44   | 1.22   | 1.43   | 1.34   | 0.61   |
| GAIF01009438.1 | 19.23  | 7.7    | 9.36   | 69.06  | 97.77  | 47.15  |
| GAIF01009440.1 | 29.87  | 20.27  | 9.49   | 73.32  | 63.85  | 3.25   |
| GAIF01009441.1 | 3.35   | 2.08   | 2.18   | 9.37   | 17.44  | 15.23  |
| GAIF01009442.1 | 84.2   | 77.46  | 50.18  | 400.85 | 593.39 | 45.63  |
| GAIF01009443.1 | 52.77  | 33.73  | 14.62  | 3.45   | 1.45   | 2.19   |
| GAIF01009444.1 | 2.44   | 3.98   | 2.18   | 7.44   | 6.61   | 0.34   |
| GAIF01009445.1 | 0      | 0      | 0      | 0      | 0      | 0.02   |
| GAIF01009446.1 | 0.29   | 0.08   | 0      | 0.25   | 0.09   | 0.12   |
| GAIF01009447.1 | 54.68  | 48.27  | 37.29  | 23.01  | 28.23  | 4.66   |
| GAIF01009448.1 | 0.06   | 0      | 0      | 0      | 0      | 0      |
| GAIF01009449.1 | 3.82   | 6.59   | 3.58   | 35.53  | 54.72  | 1.4    |
| GAIF01009450.1 | 0.32   | 0.12   | 0.25   | 0.26   | 0.67   | 0.12   |
| GAIF01009451.1 | 0      | 0      | 0      | 0      | 0.19   | 0      |
| GAIF01009452.1 | 0.55   | 0.45   | 0      | 1.91   | 6.45   | 0      |
| GAIF01009453.1 | 0      | 0      | 0      | 0.06   | 0.06   | 0      |
| GAIF01009454.1 | 0      | 0      | 0      | 0      | 0.49   | 0      |
| GAIF01009455.1 | 0.51   | 0      | 0      | 0.66   | 2.91   | 2.22   |
| GAIF01009456.1 | 12.66  | 5.36   | 7.17   | 23.53  | 25.52  | 10.37  |
| GAIF01009457.1 | 0      | 0      | 0      | 0.28   | 0.8    | 0.13   |
| GAIF01009458.1 | 238.19 | 202.29 | 160.99 | 244.93 | 202.3  | 94.64  |
| GAIF01009461.1 | 0      | 0      | 0      | 0.47   | 0.15   | 0      |
| GAIF01009464.1 | 0.56   | 0.22   | 0.34   | 0.18   | 0.49   | 0.4    |
| GAIF01009465.1 | 0      | 0      | 0      | 0      | 1.68   | 0      |
| GAIF01009466.1 | 150.13 | 176.02 | 218.84 | 186.95 | 124.79 | 197.8  |
| GAIF01009467.1 | 0.85   | 0.37   | 0.18   | 1.32   | 2.78   | 0.1    |
| GAIF01009468.1 | 174.04 | 144.74 | 122.56 | 233.32 | 234.99 | 145.27 |
| GAIF01009469.1 | 10.43  | 4.67   | 7.15   | 7.96   | 7.66   | 7.62   |
| GAIF01009470.1 | 29.84  | 38.02  | 26.31  | 16.44  | 8.36   | 8.5    |
| GAIF01009471.1 | 0      | 0      | 0      | 0.04   | 0.13   | 0      |
| GAIF01009472.1 | 0.29   | 0.19   | 1.28   | 0.39   | 0.65   | 0.19   |
| GAIF01009473.1 | 0      | 0.48   | 0      | 0      | 0.4    | 0.12   |
| GAIF01009477.1 | 49.66  | 31.04  | 17.63  | 15.53  | 17.68  | 2.2    |
| GAIF01009478.1 | 0      | 0      | 0      | 0      | 0.99   | 0      |
| GAIF01009479.1 | 0.23   | 0.14   | 0.03   | 0.32   | 0.51   | 0      |
| GAIF01009480.1 | 0.63   | 0.17   | 0      | 5.79   | 26.38  | 0.4    |
| GAIF01009481.1 | 0.94   | 0.9    | 0      | 1.91   | 6.4    | 0.32   |
| GAIF01009482.1 | 140.75 | 28.17  | 34.28  | 10.4   | 6.4    | 11.61  |
| GAIF01009483.1 | 12.71  | 14.65  | 10.46  | 21.26  | 42.02  | 9.38   |
| GAIF01009484.1 | 5.57   | 1.15   | 0.62   | 1.64   | 1.19   | 1.09   |
| GAIF01009485.1 | 0      | 0      | 0      | 0      | 0.14   | 0      |
| GAIF01009486.1 | 0      | 0      | 0.01   | 0      | 0      | 0      |
| GAIF01009487.1 | 0.74   | 0.4    | 1.63   | 0.86   | 0.3    | 0.41   |
| GAIF01009488.1 | 3.25   | 3.41   | 2.09   | 2.47   | 1.88   | 0.12   |

|                |        |        |        |         |        |        |
|----------------|--------|--------|--------|---------|--------|--------|
| GAIF01009489.1 | 16.15  | 9.57   | 4.54   | 22.66   | 34.95  | 0      |
| GAIF01009490.1 | 39.11  | 33.01  | 31.94  | 42.7    | 32.71  | 25.68  |
| GAIF01009491.1 | 0      | 0      | 0.03   | 0       | 0.06   | 0      |
| GAIF01009492.1 | 6.02   | 5.75   | 0.6    | 9.95    | 32.47  | 17.89  |
| GAIF01009493.1 | 30.6   | 12.49  | 8.15   | 0       | 0.1    | 0.05   |
| GAIF01009494.1 | 0      | 0      | 0      | 0       | 0.06   | 0      |
| GAIF01009495.1 | 53.16  | 87.28  | 27.69  | 3.33    | 0.86   | 0.4    |
| GAIF01009499.1 | 0      | 0      | 0      | 0.68    | 0.7    | 0      |
| GAIF01009500.1 | 0.05   | 0.05   | 0      | 0.32    | 2.28   | 0      |
| GAIF01009505.1 | 27.01  | 14.75  | 7.15   | 48.45   | 54.49  | 31.44  |
| GAIF01009506.1 | 0.13   | 0.14   | 0.11   | 0.04    | 0.08   | 0.76   |
| GAIF01009507.1 | 2.31   | 2.84   | 1.65   | 8.45    | 17.33  | 3.28   |
| GAIF01009508.1 | 0      | 0      | 0      | 0.08    | 0.35   | 0      |
| GAIF01009509.1 | 0.35   | 1.43   | 0.68   | 0.92    | 0.21   | 0      |
| GAIF01009510.1 | 7.18   | 4.19   | 3.08   | 21.83   | 25.6   | 2.32   |
| GAIF01009511.1 | 55.44  | 70.31  | 52.95  | 131.71  | 69.86  | 16.8   |
| GAIF01009512.1 | 19.86  | 26.85  | 30.96  | 14.37   | 23.22  | 6.51   |
| GAIF01009513.1 | 0      | 0      | 0      | 0       | 0.14   | 0      |
| GAIF01009515.1 | 0.1    | 0      | 0      | 0.47    | 2.18   | 0      |
| GAIF01009516.1 | 0.07   | 0      | 0      | 0.08    | 0.25   | 0      |
| GAIF01009517.1 | 0.43   | 0.31   | 0.32   | 1.73    | 4.07   | 0.16   |
| GAIF01009518.1 | 11.99  | 8.45   | 5.81   | 23.31   | 11.13  | 4.92   |
| GAIF01009519.1 | 140.93 | 188.79 | 244.88 | 367.25  | 319.47 | 16.56  |
| GAIF01009520.1 | 0      | 0      | 0      | 0       | 0.09   | 0.15   |
| GAIF01009521.1 | 0      | 0      | 0      | 0       | 0.25   | 0.15   |
| GAIF01009522.1 | 12.05  | 23.55  | 40.85  | 22.15   | 22.32  | 30.48  |
| GAIF01009523.1 | 8.93   | 7.4    | 8.77   | 23.1    | 13.61  | 5.41   |
| GAIF01009525.1 | 11.02  | 11.83  | 12.53  | 32.78   | 20.72  | 13.83  |
| GAIF01009526.1 | 14.39  | 6.78   | 3.25   | 10.2    | 37.13  | 1.29   |
| GAIF01009527.1 | 18.83  | 21.17  | 10.16  | 4.5     | 1.29   | 0.24   |
| GAIF01009528.1 | 9.07   | 2.8    | 4.85   | 4.74    | 5.42   | 20.1   |
| GAIF01009531.1 | 0      | 0      | 0      | 0       | 0.17   | 0      |
| GAIF01009532.1 | 0.65   | 0.2    | 0      | 4.83    | 11.89  | 0.61   |
| GAIF01009533.1 | 0.68   | 0      | 0      | 0.61    | 0.99   | 0      |
| GAIF01009534.1 | 15.96  | 22.2   | 25.03  | 97.8    | 52.48  | 11.77  |
| GAIF01009535.1 | 45.47  | 36.71  | 33.81  | 13.58   | 9.75   | 4.96   |
| GAIF01009536.1 | 30.88  | 36.94  | 30.13  | 50.64   | 44.75  | 34.98  |
| GAIF01009538.1 | 0      | 0      | 0.26   | 0.27    | 0.56   | 0      |
| GAIF01009541.1 | 269.9  | 151.77 | 47.37  | 358.21  | 225.22 | 189.99 |
| GAIF01009543.1 | 2.82   | 0.4    | 0      | 3.8     | 17.72  | 8.22   |
| GAIF01009545.1 | 0      | 3.38   | 4.37   | 0       | 0      | 0      |
| GAIF01009547.1 | 0      | 0      | 0      | 0       | 0.11   | 0      |
| GAIF01009549.1 | 1104.1 | 312.47 | 63.59  | 1067.42 | 472.34 | 67.25  |
| GAIF01009550.1 | 0      | 0.16   | 0      | 0.17    | 0      | 0      |

|                |        |        |        |        |        |       |
|----------------|--------|--------|--------|--------|--------|-------|
| GAIF01009551.1 | 55.62  | 37.5   | 76.77  | 66.55  | 34.12  | 31.14 |
| GAIF01009552.1 | 3.97   | 5.33   | 3.08   | 9.22   | 5      | 0     |
| GAIF01009553.1 | 3.68   | 4.93   | 2.43   | 6.3    | 6.98   | 0.8   |
| GAIF01009554.1 | 10.68  | 10.66  | 13.68  | 63.57  | 76.73  | 6.85  |
| GAIF01009557.1 | 0      | 0.04   | 0.13   | 0.22   | 0.91   | 0     |
| GAIF01009558.1 | 5.02   | 8.52   | 5.78   | 1.85   | 1.32   | 0.13  |
| GAIF01009559.1 | 0      | 0      | 0      | 0      | 0.18   | 0     |
| GAIF01009560.1 | 10.84  | 11.96  | 13.27  | 31.5   | 18.1   | 8.68  |
| GAIF01009563.1 | 0.88   | 1.41   | 0.61   | 1.78   | 0.56   | 0.56  |
| GAIF01009564.1 | 0.14   | 0.69   | 0.08   | 0      | 0      | 0     |
| GAIF01009565.1 | 0.64   | 0.56   | 0.28   | 0.44   | 0.77   | 0     |
| GAIF01009566.1 | 4.32   | 2.81   | 2.25   | 14.29  | 16.04  | 0.86  |
| GAIF01009567.1 | 0      | 0      | 0.08   | 0      | 0      | 0     |
| GAIF01009568.1 | 127.86 | 139.67 | 116.02 | 120.21 | 82.92  | 19.68 |
| GAIF01009571.1 | 4.61   | 5.54   | 7.6    | 4.05   | 2.16   | 3.04  |
| GAIF01009573.1 | 36.99  | 13.79  | 24.43  | 13.05  | 3.57   | 19.32 |
| GAIF01009574.1 | 0.48   | 0      | 0.09   | 0.09   | 0.29   | 0     |
| GAIF01009577.1 | 11.72  | 23.44  | 13.83  | 45.41  | 22.73  | 4.26  |
| GAIF01009578.1 | 4.22   | 7.75   | 5.79   | 3.83   | 2.22   | 1.02  |
| GAIF01009583.1 | 0      | 0      | 0      | 0.07   | 0      | 0     |
| GAIF01009584.1 | 0      | 0      | 0      | 0.05   | 0      | 0     |
| GAIF01009585.1 | 15.84  | 21.56  | 31.24  | 35.32  | 24.99  | 11.72 |
| GAIF01009587.1 | 0.46   | 0.18   | 0.23   | 0.39   | 2.39   | 0.13  |
| GAIF01009588.1 | 11.54  | 14.38  | 6.61   | 8.51   | 4.3    | 1.73  |
| GAIF01009589.1 | 0.13   | 0.27   | 0      | 6.56   | 13.9   | 0     |
| GAIF01009591.1 | 0      | 0.16   | 0      | 0.64   | 1.99   | 0.19  |
| GAIF01009592.1 | 0      | 0      | 0      | 0      | 0.15   | 0     |
| GAIF01009594.1 | 0.04   | 0      | 0      | 0      | 0      | 0     |
| GAIF01009595.1 | 0.22   | 0.12   | 0      | 1.46   | 8.01   | 2.41  |
| GAIF01009596.1 | 3.31   | 0.86   | 0.52   | 2.56   | 0      | 0     |
| GAIF01009597.1 | 7.6    | 1.4    | 0.71   | 16.04  | 33.57  | 12.69 |
| GAIF01009598.1 | 0.19   | 0.13   | 0.32   | 0.2    | 0.73   | 0.13  |
| GAIF01009599.1 | 79.18  | 39.58  | 72.5   | 82.27  | 37.03  | 42.72 |
| GAIF01009604.1 | 7      | 10.6   | 3.3    | 64.13  | 52.55  | 1.67  |
| GAIF01009605.1 | 14.23  | 14.96  | 16.99  | 32.66  | 12.22  | 22.4  |
| GAIF01009607.1 | 60.69  | 38.3   | 14.2   | 70.06  | 120.31 | 35.43 |
| GAIF01009608.1 | 0      | 0.1    | 0      | 0      | 0.05   | 0     |
| GAIF01009609.1 | 2.25   | 0.8    | 0.91   | 8.79   | 9.05   | 2.16  |
| GAIF01009610.1 | 1.7    | 3.24   | 1.73   | 0.97   | 1.2    | 0.07  |
| GAIF01009611.1 | 0      | 0.33   | 0.14   | 0.69   | 0.71   | 0.13  |
| GAIF01009612.1 | 8.2    | 0      | 0.29   | 2.76   | 1.75   | 30.18 |
| GAIF01009613.1 | 0      | 0      | 0      | 0.14   | 0.37   | 0     |
| GAIF01009615.1 | 0.21   | 0.16   | 0.05   | 0.37   | 1.16   | 0     |
| GAIF01009616.1 | 0      | 0.04   | 0      | 0.04   | 0.29   | 0     |

|                |        |        |        |        |        |       |
|----------------|--------|--------|--------|--------|--------|-------|
| GAIF01009617.1 | 0.11   | 0.24   | 0      | 0.65   | 5.48   | 0     |
| GAIF01009619.1 | 0.07   | 0.17   | 0      | 0.34   | 0.37   | 0.14  |
| GAIF01009620.1 | 2.51   | 2.57   | 2.75   | 7.03   | 4.27   | 1     |
| GAIF01009621.1 | 1.92   | 0.34   | 0.07   | 1.8    | 28.21  | 1.09  |
| GAIF01009622.1 | 0      | 0      | 0.09   | 1.37   | 2.59   | 0.17  |
| GAIF01009623.1 | 0      | 0      | 0      | 1.08   | 8.24   | 0     |
| GAIF01009624.1 | 36.43  | 36.91  | 18.51  | 44.22  | 57.69  | 26.34 |
| GAIF01009625.1 | 0.31   | 0.38   | 0.04   | 1.55   | 4.29   | 0.04  |
| GAIF01009626.1 | 0.27   | 0.22   | 0.23   | 0.24   | 1.24   | 0     |
| GAIF01009627.1 | 0.3    | 0.33   | 0.33   | 1.05   | 2.37   | 0.33  |
| GAIF01009628.1 | 0.75   | 0.05   | 0      | 0.94   | 7.49   | 0.04  |
| GAIF01009629.1 | 99.14  | 461.52 | 563.61 | 5.14   | 9.23   | 13.22 |
| GAIF01009631.1 | 0      | 0      | 0      | 0      | 0.04   | 0     |
| GAIF01009632.1 | 1.36   | 0.11   | 0.32   | 6.66   | 28.53  | 2.89  |
| GAIF01009634.1 | 1.26   | 0.19   | 0.39   | 2.71   | 13.37  | 22.13 |
| GAIF01009636.1 | 106.27 | 87.61  | 80.59  | 69.87  | 36.79  | 35.76 |
| GAIF01009637.1 | 0.21   | 0.03   | 0      | 1.68   | 4.76   | 0.17  |
| GAIF01009639.1 | 28.39  | 24.57  | 15.25  | 131.43 | 72.1   | 11.46 |
| GAIF01009640.1 | 0.35   | 0.16   | 0.25   | 0      | 0      | 0     |
| GAIF01009643.1 | 43.3   | 35.32  | 35.44  | 46.7   | 32.89  | 36.71 |
| GAIF01009647.1 | 0      | 0      | 0      | 0.05   | 0.57   | 0.09  |
| GAIF01009648.1 | 0.14   | 0.15   | 0.15   | 0.16   | 0.37   | 0.23  |
| GAIF01009649.1 | 5.21   | 0.83   | 0      | 1.51   | 2.09   | 0.36  |
| GAIF01009650.1 | 2.1    | 0.26   | 0.15   | 0.2    | 0      | 0.71  |
| GAIF01009652.1 | 0.1    | 0.05   | 0      | 0.57   | 2.47   | 0.05  |
| GAIF01009653.1 | 2.32   | 0.72   | 0.18   | 2.5    | 4.78   | 0     |
| GAIF01009654.1 | 0.13   | 0      | 0      | 0      | 0.17   | 0     |
| GAIF01009655.1 | 284.88 | 366.51 | 465.9  | 193    | 151.49 | 300.8 |
| GAIF01009656.1 | 0.3    | 0.11   | 0      | 1.16   | 7.75   | 0.53  |
| GAIF01009657.1 | 1      | 0.21   | 0.37   | 3.5    | 15.83  | 1.93  |
| GAIF01009660.1 | 0      | 0.12   | 0      | 0      | 0.14   | 0     |
| GAIF01009662.1 | 1.31   | 0.65   | 0.23   | 3.53   | 13.65  | 0.66  |
| GAIF01009663.1 | 3.27   | 1.41   | 0.96   | 6.92   | 7.92   | 1.06  |
| GAIF01009665.1 | 0      | 0.57   | 0      | 1.22   | 9.95   | 0.58  |
| GAIF01009666.1 | 0      | 0      | 0      | 0.06   | 0.2    | 0     |
| GAIF01009667.1 | 7.64   | 7.13   | 6.24   | 4.22   | 1.92   | 1.33  |
| GAIF01009668.1 | 0      | 0      | 0      | 0.06   | 0      | 0     |
| GAIF01009671.1 | 48.49  | 503.03 | 198.36 | 37.72  | 46.34  | 37.98 |
| GAIF01009672.1 | 1.85   | 0.74   | 0.69   | 3.5    | 4.75   | 0.7   |
| GAIF01009673.1 | 2.77   | 1.87   | 0.94   | 2.88   | 7.46   | 0.95  |
| GAIF01009674.1 | 0.08   | 0      | 0      | 0.32   | 0.8    | 0     |
| GAIF01009675.1 | 0.08   | 0.14   | 0      | 0.04   | 0      | 0.09  |
| GAIF01009677.1 | 0.17   | 0.31   | 0.13   | 0.13   | 1.17   | 0     |
| GAIF01009679.1 | 3.09   | 8.49   | 0.16   | 7.96   | 24.92  | 0     |

|                |        |        |        |        |        |        |
|----------------|--------|--------|--------|--------|--------|--------|
| GAIF01009680.1 | 0.26   | 0.42   | 0.14   | 1.8    | 1.55   | 0      |
| GAIF01009681.1 | 38.02  | 58.71  | 123.3  | 44.04  | 35.52  | 25.47  |
| GAIF01009682.1 | 0.07   | 1.46   | 0.29   | 0.16   | 0.32   | 0      |
| GAIF01009683.1 | 0.12   | 0.04   | 0      | 0.18   | 1.06   | 0.17   |
| GAIF01009684.1 | 24.27  | 2.25   | 0.3    | 1.69   | 8.66   | 1.22   |
| GAIF01009685.1 | 0.11   | 0.06   | 0.19   | 0.19   | 0.14   | 0.19   |
| GAIF01009686.1 | 0.08   | 0      | 0.05   | 0.11   | 0.05   | 0.05   |
| GAIF01009688.1 | 0      | 0.34   | 0.24   | 0      | 0.6    | 0      |
| GAIF01009689.1 | 0.59   | 0      | 0      | 1.08   | 7.42   | 0      |
| GAIF01009692.1 | 0      | 0      | 0      | 0.98   | 2.41   | 0      |
| GAIF01009693.1 | 0      | 0      | 0.04   | 0      | 0      | 0      |
| GAIF01009694.1 | 0.06   | 0      | 0      | 1.48   | 0.8    | 0.22   |
| GAIF01009695.1 | 0      | 0      | 0      | 0.07   | 0.15   | 0      |
| GAIF01009696.1 | 0      | 0      | 0      | 0.08   | 0.63   | 0      |
| GAIF01009698.1 | 0.1    | 0      | 0      | 0      | 0      | 0.11   |
| GAIF01009700.1 | 0.22   | 0.23   | 0.25   | 0.35   | 0.52   | 0.2    |
| GAIF01009701.1 | 0      | 0      | 0.19   | 0      | 0      | 0      |
| GAIF01009702.1 | 0.16   | 0.18   | 0.18   | 1.12   | 2.14   | 0      |
| GAIF01009703.1 | 10.09  | 4.45   | 4.58   | 24.81  | 71.15  | 54.3   |
| GAIF01009704.1 | 32.79  | 23.11  | 67.5   | 35.31  | 23.83  | 49.34  |
| GAIF01009705.1 | 124.4  | 226.63 | 41.87  | 41.71  | 71.55  | 24.52  |
| GAIF01009710.1 | 0.34   | 0      | 0.53   | 0.4    | 5.93   | 1.58   |
| GAIF01009711.1 | 0      | 0      | 0      | 0.42   | 0.59   | 0.69   |
| GAIF01009712.1 | 0      | 0      | 0      | 0      | 0      | 0.9    |
| GAIF01009714.1 | 3.09   | 0      | 0      | 7.99   | 34.68  | 17.33  |
| GAIF01009715.1 | 3.97   | 1.63   | 1.45   | 27.95  | 149.7  | 2.04   |
| GAIF01009718.1 | 0      | 0.1    | 0      | 0      | 0      | 0      |
| GAIF01009719.1 | 0.59   | 0.2    | 0      | 3.71   | 13.22  | 0.22   |
| GAIF01009720.1 | 18.92  | 8.13   | 20.45  | 8.16   | 8.54   | 24.77  |
| GAIF01009722.1 | 3.82   | 4.39   | 4.43   | 4.67   | 39     | 0      |
| GAIF01009725.1 | 0      | 0      | 0.22   | 0      | 0      | 0      |
| GAIF01009727.1 | 0.17   | 0.06   | 0.12   | 0.06   | 0      | 0      |
| GAIF01009729.1 | 207.25 | 269.77 | 393.81 | 921.99 | 385.44 | 221.18 |
| GAIF01009732.1 | 0      | 0      | 0      | 0.62   | 2.89   | 0      |
| GAIF01009734.1 | 1.49   | 1.11   | 1.18   | 0      | 1.15   | 0.23   |
| GAIF01009735.1 | 27.7   | 43.81  | 49.56  | 118.37 | 58.56  | 30.61  |
| GAIF01009736.1 | 0.47   | 0      | 0.17   | 1.99   | 11.43  | 28     |
| GAIF01009737.1 | 707.21 | 811.73 | 1731.7 | 549.28 | 413.08 | 914.75 |
| GAIF01009738.1 | 0      | 0      | 0      | 0.19   | 0.97   | 0      |
| GAIF01009739.1 | 1.87   | 0.91   | 0.5    | 4.28   | 13.37  | 1.35   |
| GAIF01009740.1 | 0      | 0      | 0      | 0.42   | 2.95   | 0.13   |
| GAIF01009741.1 | 1.17   | 4.24   | 2.68   | 0.79   | 0.35   | 0.11   |
| GAIF01009742.1 | 3.08   | 2.26   | 2.6    | 1.79   | 2.85   | 1.24   |
| GAIF01009743.1 | 6.55   | 181.99 | 28.53  | 5.43   | 25.5   | 27.46  |

|                |        |        |        |        |        |        |
|----------------|--------|--------|--------|--------|--------|--------|
| GAIF01009744.1 | 0.29   | 0.32   | 0.16   | 0.57   | 0.53   | 0.22   |
| GAIF01009746.1 | 0      | 2      | 1.66   | 0.18   | 0      | 0.01   |
| GAIF01009748.1 | 25.61  | 21.16  | 22.16  | 49.37  | 21.88  | 20.55  |
| GAIF01009749.1 | 0.81   | 0      | 0      | 0      | 0      | 0.06   |
| GAIF01009750.1 | 0      | 0.65   | 2.39   | 0      | 0      | 0.26   |
| GAIF01009751.1 | 0.03   | 0      | 0.04   | 0.15   | 0.05   | 0      |
| GAIF01009752.1 | 2.66   | 1.1    | 0.97   | 11.51  | 40.22  | 5.03   |
| GAIF01009754.1 | 2.34   | 3.63   | 1.65   | 5.52   | 3.31   | 0.64   |
| GAIF01009755.1 | 0.13   | 0.07   | 0.07   | 1.09   | 7.47   | 0.69   |
| GAIF01009756.1 | 0      | 0      | 0      | 0.31   | 1.28   | 0      |
| GAIF01009757.1 | 17.03  | 21.46  | 12.41  | 15.15  | 7.66   | 1.4    |
| GAIF01009758.1 | 0.08   | 0.18   | 0      | 0      | 0.1    | 0      |
| GAIF01009759.1 | 0      | 0      | 0      | 0.12   | 0.12   | 0.11   |
| GAIF01009761.1 | 25.45  | 10.27  | 9.58   | 5.35   | 4.64   | 2.52   |
| GAIF01009762.1 | 9.94   | 1.48   | 0.15   | 3.79   | 14.16  | 0.83   |
| GAIF01009763.1 | 2.66   | 2.89   | 1.64   | 8.65   | 5.51   | 1.06   |
| GAIF01009766.1 | 2.71   | 0      | 0      | 7.15   | 9.25   | 3.98   |
| GAIF01009768.1 | 0      | 0.1    | 0.03   | 0.18   | 0.84   | 0.03   |
| GAIF01009769.1 | 0      | 0      | 0      | 0.01   | 0      | 0.01   |
| GAIF01009771.1 | 0      | 0      | 0      | 0.06   | 0.25   | 0.1    |
| GAIF01009772.1 | 480.93 | 678.42 | 635.18 | 636.01 | 390.14 | 199.12 |
| GAIF01009773.1 | 5.61   | 4.92   | 3.33   | 16.1   | 9.47   | 0.34   |
| GAIF01009774.1 | 0      | 0.15   | 0      | 0.08   | 0.42   | 0      |
| GAIF01009775.1 | 0.19   | 0.21   | 0.05   | 0      | 0      | 0      |
| GAIF01009776.1 | 10.86  | 6.03   | 9.53   | 5.41   | 3.68   | 5.61   |
| GAIF01009777.1 | 8.14   | 13.97  | 14.43  | 19.28  | 17.3   | 4.02   |
| GAIF01009778.1 | 13.47  | 13.25  | 10.38  | 23.31  | 18.62  | 5.67   |
| GAIF01009779.1 | 0.08   | 0      | 0      | 0.53   | 1.48   | 0      |
| GAIF01009780.1 | 40.39  | 41.44  | 25.61  | 74.74  | 82.46  | 55.07  |
| GAIF01009782.1 | 0      | 0.57   | 0.37   | 0      | 0      | 0      |
| GAIF01009783.1 | 19.5   | 31.27  | 22.08  | 47.71  | 34.8   | 6.22   |
| GAIF01009784.1 | 0      | 0.22   | 0      | 0.47   | 0.73   | 0.22   |
| GAIF01009785.1 | 0.03   | 0      | 0      | 0      | 0      | 0      |
| GAIF01009787.1 | 1.37   | 1.48   | 0.75   | 4.88   | 5.01   | 0.48   |
| GAIF01009788.1 | 0.2    | 0.08   | 0      | 2.59   | 11.92  | 0      |
| GAIF01009789.1 | 15.08  | 26.05  | 21.65  | 18.69  | 78.71  | 137.11 |
| GAIF01009791.1 | 0      | 0      | 0      | 0      | 0.05   | 0      |
| GAIF01009792.1 | 0.57   | 0.93   | 0.73   | 2.31   | 1.03   | 0      |
| GAIF01009793.1 | 0.33   | 0.84   | 0.85   | 2.18   | 1.73   | 0.49   |
| GAIF01009795.1 | 0      | 0      | 0      | 1.65   | 0.87   | 0      |
| GAIF01009796.1 | 0.21   | 0      | 0      | 0      | 0.18   | 0      |
| GAIF01009799.1 | 6.74   | 7.79   | 14.74  | 32.29  | 25.35  | 11.11  |
| GAIF01009800.1 | 8.12   | 3.46   | 0.94   | 1.8    | 3.07   | 0.5    |
| GAIF01009802.1 | 1.37   | 3.58   | 2.11   | 1.11   | 0.33   | 0.15   |



|                |        |        |        |        |        |        |
|----------------|--------|--------|--------|--------|--------|--------|
| GAIF01009804.1 | 0      | 0      | 0      | 0      | 0.04   | 0      |
| GAIF01009805.1 | 0.3    | 0.22   | 0.66   | 0.06   | 0      | 0.06   |
| GAIF01009806.1 | 0.1    | 0.1    | 0.1    | 0.27   | 2.56   | 0      |
| GAIF01009807.1 | 29.76  | 32.35  | 31.01  | 66.88  | 39.41  | 16.4   |
| GAIF01009808.1 | 0.08   | 0.17   | 0      | 0.09   | 0      | 0      |
| GAIF01009810.1 | 0.03   | 0.03   | 0      | 0      | 0.11   | 0      |
| GAIF01009811.1 | 0.11   | 0      | 0.12   | 0.12   | 0.16   | 0      |
| GAIF01009812.1 | 0      | 0      | 0      | 0      | 0.01   | 0      |
| GAIF01009813.1 | 33.06  | 28.15  | 17.8   | 169.52 | 251.54 | 68.97  |
| GAIF01009814.1 | 70.8   | 78.38  | 70.03  | 116.26 | 67.9   | 21.24  |
| GAIF01009816.1 | 6.96   | 5.4    | 0      | 23.16  | 17.37  | 0.87   |
| GAIF01009817.1 | 0      | 0      | 0      | 0      | 0.62   | 0      |
| GAIF01009819.1 | 0.14   | 0.23   | 0.08   | 0.21   | 0.25   | 0      |
| GAIF01009820.1 | 35.56  | 24.54  | 30.33  | 64.76  | 35.03  | 54.56  |
| GAIF01009821.1 | 0.78   | 0.34   | 0.07   | 4.59   | 21.52  | 0.36   |
| GAIF01009823.1 | 59.57  | 45.01  | 18.88  | 7.23   | 6.36   | 0      |
| GAIF01009824.1 | 14.72  | 33.73  | 14.95  | 42.47  | 70.81  | 4.17   |
| GAIF01009826.1 | 0      | 0      | 0      | 0      | 0      | 0.14   |
| GAIF01009827.1 | 0.25   | 0.15   | 0.24   | 0.18   | 1.96   | 0.09   |
| GAIF01009828.1 | 0      | 0      | 0      | 0      | 0.61   | 0.25   |
| GAIF01009829.1 | 83.83  | 56.81  | 0      | 89.08  | 102.47 | 51.02  |
| GAIF01009830.1 | 4.02   | 0.57   | 1.06   | 8.94   | 12.63  | 3.28   |
| GAIF01009831.1 | 0      | 7.58   | 0      | 0      | 0      | 0      |
| GAIF01009832.1 | 18.76  | 12.89  | 20.43  | 48.42  | 19.49  | 24.97  |
| GAIF01009833.1 | 0.54   | 0      | 0      | 0.37   | 2.23   | 0.09   |
| GAIF01009836.1 | 3.39   | 0      | 1.85   | 5.83   | 1.18   | 8.09   |
| GAIF01009837.1 | 12.18  | 8.76   | 11.13  | 1.84   | 0.59   | 1.5    |
| GAIF01009838.1 | 0      | 0      | 0      | 0      | 1.51   | 0      |
| GAIF01009839.1 | 0.98   | 0.4    | 0      | 0      | 0.15   | 0      |
| GAIF01009840.1 | 1.51   | 1.16   | 1.73   | 1.77   | 1.29   | 0.45   |
| GAIF01009842.1 | 0      | 0      | 0      | 0.54   | 1.48   | 0.17   |
| GAIF01009843.1 | 5.46   | 2.94   | 4.11   | 12.39  | 35.06  | 15.56  |
| GAIF01009844.1 | 157.39 | 171.41 | 199.77 | 105.01 | 96.62  | 178.33 |
| GAIF01009847.1 | 0      | 0.26   | 0      | 0.22   | 0.94   | 0      |
| GAIF01009848.1 | 0      | 0.5    | 0.19   | 0.34   | 1.2    | 0      |
| GAIF01009849.1 | 4.49   | 8.57   | 3.72   | 10.41  | 25.12  | 0.52   |
| GAIF01009850.1 | 0      | 0.1    | 0      | 0      | 0      | 0      |
| GAIF01009851.1 | 0      | 0      | 0      | 0      | 0.01   | 0      |
| GAIF01009853.1 | 0      | 0      | 0.06   | 0      | 0      | 0.04   |
| GAIF01009855.1 | 302.59 | 1.21   | 3.66   | 12.62  | 0.67   | 0.73   |
| GAIF01009856.1 | 0      | 0      | 0      | 0.17   | 0.36   | 0      |
| GAIF01009857.1 | 0      | 0      | 0      | 0      | 0.66   | 0      |
| GAIF01009858.1 | 0.07   | 0      | 0      | 0.31   | 0.16   | 0      |
| GAIF01009859.1 | 0      | 0.15   | 0      | 0      | 0      | 0      |

|                |        |        |        |        |        |       |
|----------------|--------|--------|--------|--------|--------|-------|
| GAIF01009860.1 | 3.93   | 6.88   | 8.94   | 15.57  | 13.81  | 3.26  |
| GAIF01009861.1 | 0.32   | 0      | 0      | 0.18   | 0.38   | 0     |
| GAIF01009862.1 | 29.64  | 12.38  | 14.69  | 54.87  | 37.31  | 40.8  |
| GAIF01009863.1 | 19.58  | 8.75   | 13.2   | 21.5   | 16.9   | 13.34 |
| GAIF01009864.1 | 7.36   | 8.99   | 6.16   | 0.36   | 1.28   | 0.37  |
| GAIF01009865.1 | 1.69   | 0      | 0.14   | 3.18   | 8.78   | 2.58  |
| GAIF01009869.1 | 16.45  | 27.93  | 11.99  | 68.22  | 90.53  | 7.91  |
| GAIF01009870.1 | 0.09   | 0.1    | 0      | 0.27   | 0.11   | 0     |
| GAIF01009871.1 | 0.19   | 0      | 0      | 0      | 0      | 0.13  |
| GAIF01009872.1 | 11.12  | 32.75  | 30     | 60.54  | 55.91  | 5.97  |
| GAIF01009873.1 | 0      | 0      | 0      | 0      | 0.12   | 0     |
| GAIF01009874.1 | 20.42  | 27.69  | 21.19  | 54.88  | 51.36  | 24.56 |
| GAIF01009877.1 | 0      | 1.45   | 0.33   | 0.9    | 0.43   | 0.38  |
| GAIF01009878.1 | 0.1    | 0      | 0.11   | 0      | 2.74   | 0     |
| GAIF01009879.1 | 5.88   | 8.74   | 7.83   | 17.52  | 8.53   | 0.78  |
| GAIF01009880.1 | 0      | 0      | 1.75   | 0.06   | 0      | 0.05  |
| GAIF01009881.1 | 0      | 0      | 0      | 0.48   | 4.95   | 0     |
| GAIF01009882.1 | 0      | 0      | 0.82   | 0      | 0      | 0.12  |
| GAIF01009883.1 | 0      | 0.08   | 0.08   | 0      | 0      | 0     |
| GAIF01009884.1 | 3.21   | 0.38   | 0.96   | 10.19  | 16.92  | 1.36  |
| GAIF01009885.1 | 0.15   | 0      | 0      | 0.6    | 1.52   | 0     |
| GAIF01009886.1 | 0      | 0      | 0      | 0.1    | 0      | 0     |
| GAIF01009887.1 | 0      | 0      | 0.36   | 0.25   | 2.99   | 0     |
| GAIF01009889.1 | 1.71   | 0.86   | 0.72   | 2.73   | 4.05   | 0.43  |
| GAIF01009890.1 | 0      | 0      | 0      | 0.11   | 1.06   | 0     |
| GAIF01009892.1 | 0      | 0      | 0      | 0      | 0.54   | 0     |
| GAIF01009893.1 | 4.76   | 5.33   | 4.81   | 17.89  | 17.75  | 1.98  |
| GAIF01009894.1 | 124.82 | 102.52 | 29.5   | 363.14 | 689.61 | 49.82 |
| GAIF01009895.1 | 0      | 0      | 0      | 0.18   | 0.4    | 0     |
| GAIF01009896.1 | 2.81   | 3.08   | 2.47   | 1.21   | 2.42   | 0.37  |
| GAIF01009899.1 | 0      | 0.41   | 0      | 0      | 0      | 0     |
| GAIF01009900.1 | 0.21   | 0.91   | 0.81   | 0.73   | 0.63   | 0.69  |
| GAIF01009901.1 | 1.57   | 1.49   | 2.15   | 2.96   | 8.49   | 0.43  |
| GAIF01009902.1 | 6.4    | 8.43   | 6.95   | 19.47  | 10.28  | 2.04  |
| GAIF01009903.1 | 21.57  | 31.84  | 53.78  | 5.13   | 6.46   | 27.9  |
| GAIF01009904.1 | 12.67  | 16.51  | 7.91   | 9.97   | 3.96   | 0     |
| GAIF01009910.1 | 0.12   | 0      | 0      | 0      | 0      | 0     |
| GAIF01009911.1 | 0      | 0.03   | 0.08   | 0      | 0.04   | 0     |
| GAIF01009912.1 | 23.29  | 48.66  | 77.88  | 33.2   | 18.6   | 17.14 |
| GAIF01009913.1 | 0      | 0      | 0      | 0      | 0.48   | 0     |
| GAIF01009914.1 | 9.47   | 0.98   | 0.34   | 26.23  | 59.01  | 10.01 |
| GAIF01009915.1 | 0.68   | 0.98   | 0.25   | 4.97   | 12.39  | 0.41  |
| GAIF01009916.1 | 0      | 0      | 0      | 0      | 0.08   | 0     |
| GAIF01009917.1 | 836.65 | 645.65 | 197.13 | 0      | 0.25   | 7.53  |

|                |       |       |       |        |        |        |
|----------------|-------|-------|-------|--------|--------|--------|
| GAIF01009918.1 | 0     | 0     | 0     | 25.7   | 0      | 0      |
| GAIF01009919.1 | 0.18  | 0.2   | 0.16  | 0.04   | 0      | 0      |
| GAIF01009920.1 | 50.29 | 39.97 | 16.81 | 127.22 | 192.54 | 70.76  |
| GAIF01009921.1 | 0     | 0     | 0     | 0.64   | 0.17   | 0.28   |
| GAIF01009922.1 | 20.29 | 13.01 | 5.52  | 0      | 0.21   | 0      |
| GAIF01009923.1 | 0     | 0     | 0     | 0.55   | 3.32   | 0      |
| GAIF01009924.1 | 4.87  | 4.76  | 2.73  | 12.08  | 24.05  | 0      |
| GAIF01009925.1 | 0     | 0.1   | 0.1   | 0.11   | 0.11   | 0      |
| GAIF01009927.1 | 0.13  | 0     | 0.07  | 1.12   | 9.76   | 0.07   |
| GAIF01009929.1 | 0     | 0     | 0     | 3.04   | 5.27   | 0      |
| GAIF01009930.1 | 0.1   | 0.34  | 0.23  | 1.46   | 4.28   | 0.46   |
| GAIF01009931.1 | 17.48 | 11.91 | 6.91  | 18.61  | 19.71  | 1.58   |
| GAIF01009932.1 | 1.17  | 2.79  | 3.61  | 0      | 2.51   | 6.41   |
| GAIF01009933.1 | 0     | 0     | 0     | 0.68   | 1.26   | 0      |
| GAIF01009934.1 | 0.08  | 0     | 0     | 2.38   | 6.2    | 1.53   |
| GAIF01009935.1 | 0     | 22.25 | 24.36 | 0      | 0      | 7.64   |
| GAIF01009936.1 | 76.03 | 37.74 | 44.26 | 96.96  | 78.1   | 174.55 |
| GAIF01009937.1 | 0.38  | 0.24  | 0.34  | 9.71   | 46.82  | 0.97   |
| GAIF01009938.1 | 0.77  | 0     | 0     | 0      | 1.23   | 0      |
| GAIF01009939.1 | 1.85  | 10.97 | 13.11 | 18.06  | 27.35  | 8.93   |
| GAIF01009940.1 | 0     | 0     | 0     | 0      | 0.07   | 0      |
| GAIF01009941.1 | 0.28  | 0.55  | 0.12  | 1.62   | 5.72   | 0.37   |
| GAIF01009942.1 | 0.08  | 0     | 0     | 0.1    | 0      | 0      |
| GAIF01009944.1 | 0.49  | 0     | 0     | 4.83   | 6.67   | 0      |
| GAIF01009945.1 | 0     | 0.28  | 0.11  | 0      | 0.04   | 0.07   |
| GAIF01009947.1 | 0.53  | 0     | 0.49  | 2.64   | 6.82   | 0.18   |
| GAIF01009949.1 | 0.03  | 0     | 0     | 0      | 0      | 0      |
| GAIF01009950.1 | 7.38  | 0     | 0.51  | 12.58  | 0.83   | 11.43  |
| GAIF01009954.1 | 0     | 0.18  | 0     | 0      | 0      | 0      |
| GAIF01009955.1 | 53.79 | 8.43  | 9.18  | 33.62  | 24.36  | 23.16  |
| GAIF01009958.1 | 2.43  | 1.92  | 0     | 8.44   | 27.9   | 0.16   |
| GAIF01009962.1 | 6.34  | 8.11  | 9.74  | 12.26  | 3.89   | 4.81   |
| GAIF01009965.1 | 0     | 0     | 0     | 0      | 0.03   | 0      |
| GAIF01009968.1 | 33.41 | 0     | 1.78  | 16.92  | 3.62   | 30.12  |
| GAIF01009969.1 | 1.05  | 1.21  | 3.87  | 3.86   | 1.29   | 2.68   |
| GAIF01009970.1 | 0.46  | 0.1   | 0     | 1.49   | 4.84   | 0      |
| GAIF01009971.1 | 0.96  | 0.85  | 1.53  | 0.35   | 0.54   | 1.13   |
| GAIF01009972.1 | 0     | 0.08  | 0     | 0.18   | 1.29   | 0.17   |
| GAIF01009973.1 | 20.92 | 15.89 | 8.99  | 53.44  | 73.04  | 14.24  |
| GAIF01009974.1 | 20.41 | 31.51 | 16.86 | 57.61  | 31.22  | 9.51   |
| GAIF01009975.1 | 2.01  | 2.27  | 1.48  | 3.12   | 1.44   | 0.16   |
| GAIF01009976.1 | 2.24  | 1.77  | 0     | 6.17   | 21.41  | 1.22   |
| GAIF01009977.1 | 14.36 | 22.15 | 20.31 | 32.18  | 26.75  | 10.87  |
| GAIF01009978.1 | 0.92  | 0.12  | 0.1   | 4.74   | 7.08   | 1.28   |

|                |        |        |        |        |        |        |
|----------------|--------|--------|--------|--------|--------|--------|
| GAIF01009979.1 | 0      | 0.01   | 0      | 0      | 0      | 0      |
| GAIF01009980.1 | 0      | 0.12   | 0      | 0      | 0.37   | 0      |
| GAIF01009982.1 | 55.84  | 21.39  | 55.22  | 18.33  | 3.33   | 4.58   |
| GAIF01009983.1 | 0      | 0      | 0      | 0      | 0.03   | 0.06   |
| GAIF01009984.1 | 1.34   | 0.13   | 0      | 0.81   | 3.7    | 0.06   |
| GAIF01009985.1 | 487.31 | 398.15 | 724.38 | 90.04  | 2.48   | 195.07 |
| GAIF01009986.1 | 0      | 0      | 0.07   | 1.35   | 4.49   | 0.27   |
| GAIF01009987.1 | 0.23   | 0.08   | 0      | 1      | 1.69   | 0.34   |
| GAIF01009988.1 | 115.64 | 139.48 | 55.44  | 188.17 | 167.27 | 14.73  |
| GAIF01009989.1 | 0.41   | 0      | 0      | 0.51   | 0.77   | 0.69   |
| GAIF01009991.1 | 37.31  | 59.61  | 39.89  | 8.23   | 42.15  | 4.06   |
| GAIF01009993.1 | 0      | 0.12   | 0.25   | 0      | 0      | 0      |
| GAIF01009995.1 | 1.13   | 2.92   | 0.47   | 7.31   | 7.49   | 0      |
| GAIF01009997.1 | 21.91  | 15.69  | 16.87  | 58.16  | 50.14  | 7.8    |
| GAIF01009998.1 | 3.95   | 3.67   | 6.25   | 3.18   | 7.36   | 3.58   |
| GAIF01009999.1 | 2.11   | 0      | 0      | 1.32   | 0.68   | 1.57   |
| GAIF01010000.1 | 0      | 1.11   | 0      | 0      | 4.25   | 0      |
| GAIF01010001.1 | 36.55  | 13.44  | 21.48  | 43.26  | 40.83  | 186.15 |
| GAIF01010002.1 | 19.78  | 7.83   | 10.45  | 24.45  | 23.64  | 13.01  |
| GAIF01010006.1 | 0      | 0      | 0      | 0.04   | 0      | 0      |
| GAIF01010007.1 | 0.18   | 0      | 0      | 0.82   | 4.36   | 0      |
| GAIF01010009.1 | 0      | 0      | 0      | 0      | 0.35   | 0      |
| GAIF01010010.1 | 5.33   | 0.88   | 3.5    | 11.58  | 0.86   | 3.88   |
| GAIF01010011.1 | 0      | 0      | 0      | 0      | 0      | 0.22   |
| GAIF01010012.1 | 85.09  | 109.3  | 75.92  | 100.2  | 101.2  | 20.88  |
| GAIF01010014.1 | 0.35   | 0.03   | 0.03   | 1.94   | 16.44  | 0.29   |
| GAIF01010015.1 | 150.7  | 152.49 | 155.27 | 96.28  | 58.63  | 47.91  |
| GAIF01010017.1 | 0      | 0      | 0      | 0      | 1.05   | 0      |
| GAIF01010018.1 | 0.09   | 0      | 0      | 0.37   | 0      | 0      |
| GAIF01010019.1 | 0      | 0      | 0      | 0      | 0      | 0.19   |
| GAIF01010020.1 | 1.67   | 1.11   | 0.36   | 5.23   | 12.46  | 0.92   |
| GAIF01010021.1 | 0.11   | 0.12   | 0.12   | 0.52   | 1.48   | 0.12   |
| GAIF01010025.1 | 0      | 0      | 0      | 0      | 0.17   | 0.15   |
| GAIF01010026.1 | 0      | 0      | 0.36   | 0      | 0      | 0.09   |
| GAIF01010027.1 | 2.78   | 0.49   | 0      | 1.04   | 0      | 0      |
| GAIF01010028.1 | 64.32  | 58.52  | 107.82 | 104.98 | 48.79  | 82.72  |
| GAIF01010034.1 | 81.42  | 50.9   | 42.01  | 135.99 | 80.82  | 91.86  |
| GAIF01010035.1 | 0      | 0      | 0      | 0.96   | 31.43  | 0.07   |
| GAIF01010038.1 | 7.1    | 7.87   | 3.03   | 0      | 19.63  | 2.6    |
| GAIF01010040.1 | 0      | 1.28   | 0      | 0.84   | 0.75   | 0.84   |
| GAIF01010041.1 | 0.08   | 0.09   | 0      | 0.38   | 1.46   | 0      |
| GAIF01010043.1 | 12.68  | 3.61   | 1.2    | 1.27   | 2.63   | 4.64   |
| GAIF01010046.1 | 4.61   | 2.4    | 0.22   | 8.38   | 14.95  | 8.4    |
| GAIF01010048.1 | 0      | 0      | 0      | 0.8    | 1.07   | 0      |

|                |       |        |        |        |        |       |
|----------------|-------|--------|--------|--------|--------|-------|
| GAIF01010053.1 | 4.55  | 5.31   | 5.92   | 1.94   | 13.26  | 8.79  |
| GAIF01010054.1 | 5.02  | 12.23  | 4.29   | 4.74   | 3.5    | 0.2   |
| GAIF01010055.1 | 0.26  | 0      | 0      | 0.45   | 1.7    | 0     |
| GAIF01010057.1 | 0.8   | 0      | 0.61   | 7.35   | 1.26   | 1.63  |
| GAIF01010059.1 | 2.48  | 3.16   | 1.07   | 6.76   | 13.74  | 2.5   |
| GAIF01010060.1 | 17.01 | 17.52  | 17.63  | 41.34  | 27.86  | 9.99  |
| GAIF01010061.1 | 0     | 0      | 0      | 0      | 0.48   | 0     |
| GAIF01010063.1 | 0.64  | 0.26   | 0      | 8.54   | 73.71  | 0.18  |
| GAIF01010064.1 | 0     | 0      | 0      | 0      | 0.01   | 0     |
| GAIF01010065.1 | 0     | 0      | 0      | 0.91   | 4.08   | 0.84  |
| GAIF01010066.1 | 11.27 | 13.03  | 23.02  | 24.2   | 11.71  | 7.98  |
| GAIF01010067.1 | 1.58  | 0.34   | 0.35   | 0      | 0      | 0     |
| GAIF01010068.1 | 0     | 1.18   | 0.11   | 0      | 0.08   | 0.07  |
| GAIF01010069.1 | 13.78 | 11.59  | 18.35  | 7.46   | 1.55   | 3.44  |
| GAIF01010070.1 | 0.91  | 0.73   | 1.12   | 2.55   | 35.68  | 2.48  |
| GAIF01010071.1 | 0     | 0.46   | 0      | 1.14   | 2.7    | 0.15  |
| GAIF01010072.1 | 0.98  | 0.11   | 0.75   | 5.17   | 16.82  | 7.84  |
| GAIF01010073.1 | 0.56  | 0.33   | 0.64   | 1.97   | 2.55   | 0.17  |
| GAIF01010074.1 | 0.46  | 0.12   | 0      | 1.27   | 9.27   | 0.34  |
| GAIF01010075.1 | 0.08  | 0      | 0.08   | 0.22   | 0      | 0.08  |
| GAIF01010076.1 | 16.56 | 12.98  | 19.37  | 59.69  | 25.62  | 18.84 |
| GAIF01010077.1 | 0     | 0      | 0      | 0      | 0.29   | 0     |
| GAIF01010078.1 | 0.23  | 0      | 0.08   | 0.89   | 3.51   | 0     |
| GAIF01010080.1 | 75.01 | 158.19 | 239.44 | 159.83 | 128.52 | 64.82 |
| GAIF01010082.1 | 0     | 0      | 0      | 0      | 0.05   | 0     |
| GAIF01010083.1 | 0     | 0.13   | 0      | 0.43   | 1.1    | 0     |
| GAIF01010084.1 | 9.3   | 9.01   | 11.06  | 14.88  | 17.15  | 5.94  |
| GAIF01010086.1 | 0     | 0.03   | 0      | 0      | 0.04   | 0     |
| GAIF01010088.1 | 0     | 0.09   | 0.28   | 0      | 0      | 0     |
| GAIF01010091.1 | 49.19 | 21.63  | 9.92   | 64.48  | 71.37  | 80.1  |
| GAIF01010092.1 | 0.13  | 0.14   | 0.72   | 1.53   | 0.47   | 1.6   |
| GAIF01010093.1 | 0.07  | 0.31   | 0      | 0.25   | 0.52   | 0     |
| GAIF01010095.1 | 2.24  | 1.21   | 0      | 1.53   | 0.84   | 2.78  |
| GAIF01010096.1 | 54.21 | 22.39  | 60.45  | 75.09  | 45.75  | 14.71 |
| GAIF01010098.1 | 0.5   | 0.55   | 0.21   | 0      | 0      | 0.14  |
| GAIF01010099.1 | 0.27  | 0      | 0      | 1.55   | 1.93   | 0     |
| GAIF01010100.1 | 83.98 | 41.87  | 17.05  | 152.25 | 169.71 | 15.48 |
| GAIF01010101.1 | 0.36  | 0      | 0.13   | 0.83   | 3.86   | 0.13  |
| GAIF01010102.1 | 0.07  | 0      | 0      | 0      | 0      | 21.57 |
| GAIF01010105.1 | 0.18  | 0.17   | 0.27   | 7.13   | 5.06   | 0.19  |
| GAIF01010106.1 | 0     | 0      | 0      | 0      | 0.25   | 0     |
| GAIF01010107.1 | 16.51 | 13.51  | 6.24   | 46.42  | 47.52  | 3.33  |
| GAIF01010108.1 | 0.44  | 0.52   | 0.19   | 2.68   | 8.44   | 0.19  |
| GAIF01010109.1 | 0.2   | 0      | 0      | 0      | 0      | 0     |

|                |        |        |        |        |        |        |
|----------------|--------|--------|--------|--------|--------|--------|
| GAIF01010110.1 | 1.42   | 0.83   | 0.18   | 1.58   | 3.45   | 8.24   |
| GAIF01010111.1 | 1.21   | 0.27   | 0.07   | 5.54   | 16.52  | 1.94   |
| GAIF01010112.1 | 0.13   | 0.17   | 0.11   | 0      | 0      | 0.19   |
| GAIF01010113.1 | 0.55   | 0.13   | 0.13   | 1.5    | 1.48   | 0.67   |
| GAIF01010115.1 | 7.13   | 0.16   | 0.17   | 13.24  | 23.95  | 3.97   |
| GAIF01010116.1 | 16.63  | 27.17  | 18.18  | 112.47 | 57.52  | 10.75  |
| GAIF01010118.1 | 40.09  | 15.82  | 12.37  | 49.51  | 60.07  | 51     |
| GAIF01010119.1 | 0      | 0      | 0      | 0.46   | 0.24   | 0      |
| GAIF01010122.1 | 36.6   | 26.46  | 15.84  | 60.67  | 17.1   | 12.32  |
| GAIF01010123.1 | 6.44   | 3.41   | 6.01   | 14.44  | 17.09  | 58.9   |
| GAIF01010124.1 | 0      | 0.06   | 0.06   | 0.68   | 1.73   | 0.08   |
| GAIF01010125.1 | 0.23   | 0.68   | 0.38   | 0.46   | 0.07   | 0      |
| GAIF01010126.1 | 0.09   | 0.02   | 0.02   | 0.95   | 10.31  | 0.03   |
| GAIF01010127.1 | 7.5    | 6.12   | 2.06   | 10.26  | 16.59  | 0.59   |
| GAIF01010130.1 | 7.43   | 4.47   | 3.71   | 22.99  | 17.97  | 6.24   |
| GAIF01010131.1 | 67.8   | 93.12  | 129.05 | 81.41  | 78.13  | 290.48 |
| GAIF01010133.1 | 0.17   | 0.06   | 0.06   | 0.59   | 1.5    | 1.31   |
| GAIF01010135.1 | 0.16   | 0.17   | 0      | 0.46   | 1.42   | 0      |
| GAIF01010136.1 | 0.76   | 0.05   | 0.2    | 1.97   | 7.48   | 0.3    |
| GAIF01010138.1 | 18.63  | 17.87  | 9.28   | 33.79  | 45.05  | 2.8    |
| GAIF01010139.1 | 0.4    | 0      | 0      | 0.36   | 2.18   | 0.09   |
| GAIF01010140.1 | 0.34   | 0      | 0.09   | 0.1    | 0      | 0.09   |
| GAIF01010141.1 | 0.29   | 0.84   | 0.86   | 0.83   | 1.41   | 0.21   |
| GAIF01010143.1 | 0      | 0.06   | 0      | 0      | 0      | 0      |
| GAIF01010148.1 | 0.69   | 0.37   | 0.53   | 0.4    | 0.62   | 0      |
| GAIF01010150.1 | 0      | 0      | 0      | 0.26   | 0.71   | 0.24   |
| GAIF01010151.1 | 8.89   | 13.05  | 9.36   | 21.02  | 13.16  | 4.27   |
| GAIF01010152.1 | 20.08  | 26.04  | 23.67  | 33.19  | 21.01  | 13.43  |
| GAIF01010153.1 | 9.03   | 1.2    | 0.27   | 2.66   | 15.67  | 0      |
| GAIF01010154.1 | 9.08   | 11.41  | 7.09   | 41.4   | 28.72  | 10.13  |
| GAIF01010155.1 | 0      | 0      | 0      | 0.09   | 0      | 0      |
| GAIF01010156.1 | 16.24  | 9.04   | 4.76   | 33.12  | 46.07  | 27.4   |
| GAIF01010157.1 | 4.38   | 2.15   | 2.17   | 0.99   | 0.58   | 0.29   |
| GAIF01010158.1 | 0      | 0      | 0      | 0.96   | 0.5    | 0      |
| GAIF01010160.1 | 0      | 0.68   | 0      | 0      | 0      | 0      |
| GAIF01010163.1 | 0.11   | 0      | 0      | 1.48   | 8      | 1.39   |
| GAIF01010164.1 | 0.87   | 0.79   | 0.64   | 1.7    | 1.25   | 0.41   |
| GAIF01010165.1 | 0.09   | 0.05   | 0      | 0.1    | 0.26   | 0      |
| GAIF01010166.1 | 38.11  | 56.21  | 54     | 23.92  | 21.71  | 19.04  |
| GAIF01010167.1 | 123.83 | 101.68 | 81.07  | 153.75 | 151.37 | 247.75 |
| GAIF01010168.1 | 5.63   | 8.96   | 4.99   | 13.56  | 13.56  | 2.29   |
| GAIF01010169.1 | 3.08   | 2.66   | 4.6    | 6.84   | 10.35  | 2.83   |
| GAIF01010170.1 | 9.81   | 5.91   | 3.81   | 9.1    | 11.32  | 2.81   |
| GAIF01010171.1 | 0      | 0      | 0      | 1.6    | 1.76   | 0      |

|                |         |         |        |        |        |        |
|----------------|---------|---------|--------|--------|--------|--------|
| GAIF01010172.1 | 0.03    | 0.11    | 0.15   | 0.12   | 0.13   | 0.02   |
| GAIF01010173.1 | 1.35    | 1.93    | 0.15   | 9.22   | 25.57  | 1.99   |
| GAIF01010175.1 | 0.1     | 0       | 0      | 0.12   | 0.25   | 0      |
| GAIF01010177.1 | 43.06   | 65.62   | 0      | 79.05  | 31.51  | 15.92  |
| GAIF01010178.1 | 0.61    | 0.48    | 0      | 5.64   | 21.76  | 0.86   |
| GAIF01010179.1 | 53.2    | 47.46   | 45.26  | 44.52  | 20.17  | 10.51  |
| GAIF01010180.1 | 0       | 0       | 0      | 0.19   | 0      | 0      |
| GAIF01010181.1 | 1591.48 | 1079.36 | 717.98 | 937.05 | 541.1  | 443.71 |
| GAIF01010182.1 | 2.58    | 2.98    | 1.03   | 1.45   | 1.22   | 0.17   |
| GAIF01010183.1 | 0.97    | 0.44    | 0      | 3.9    | 13.71  | 1.51   |
| GAIF01010184.1 | 91.17   | 64.7    | 37.79  | 69.44  | 64.5   | 15.18  |
| GAIF01010186.1 | 436.26  | 1112.84 | 675.69 | 41.22  | 142.04 | 134.13 |
| GAIF01010188.1 | 10.11   | 9.02    | 10.96  | 37.92  | 24.32  | 21.58  |
| GAIF01010189.1 | 4.39    | 4.86    | 3.73   | 11.01  | 14.62  | 4.73   |
| GAIF01010190.1 | 0       | 0.15    | 0      | 0      | 0      | 0      |
| GAIF01010191.1 | 0.14    | 0       | 0      | 5.97   | 1.46   | 1.34   |
| GAIF01010194.1 | 0.09    | 0.28    | 0      | 0.8    | 0.52   | 0.19   |
| GAIF01010195.1 | 23      | 30.82   | 41.29  | 68.9   | 28.4   | 28.86  |
| GAIF01010196.1 | 0.05    | 0       | 0      | 0      | 0      | 0      |
| GAIF01010197.1 | 1.11    | 0.99    | 0.86   | 0.72   | 0.54   | 0.25   |
| GAIF01010199.1 | 7.1     | 3.07    | 3.76   | 4.66   | 0      | 1.27   |
| GAIF01010200.1 | 0       | 0       | 0      | 0      | 0.33   | 0      |
| GAIF01010201.1 | 0       | 0       | 0      | 0      | 0.09   | 0      |
| GAIF01010202.1 | 0       | 0.06    | 0      | 0      | 0      | 0      |
| GAIF01010203.1 | 10.66   | 8.07    | 13.36  | 26.43  | 16.46  | 28.78  |
| GAIF01010204.1 | 0       | 3.89    | 0      | 0      | 0.1    | 0      |
| GAIF01010205.1 | 0.2     | 0       | 0.11   | 0.92   | 2.16   | 0.33   |
| GAIF01010206.1 | 0.23    | 0       | 0      | 0      | 0.14   | 0      |
| GAIF01010207.1 | 15.41   | 16.63   | 32.46  | 69.55  | 36.92  | 21.26  |
| GAIF01010208.1 | 0.06    | 0.13    | 0.07   | 0.28   | 0.39   | 0      |
| GAIF01010209.1 | 1.64    | 2.95    | 4.12   | 0.61   | 0.61   | 0.4    |
| GAIF01010210.1 | 22.77   | 21.66   | 6.38   | 90.94  | 90.22  | 3.86   |
| GAIF01010211.1 | 0       | 0       | 0.14   | 0      | 0      | 0      |
| GAIF01010212.1 | 0       | 0       | 0      | 0      | 0.1    | 0      |
| GAIF01010215.1 | 1.44    | 0.26    | 1.32   | 0.56   | 0.72   | 0.13   |
| GAIF01010216.1 | 0       | 0       | 0      | 0.05   | 0.1    | 0      |
| GAIF01010217.1 | 0.06    | 0       | 0      | 0.92   | 1.43   | 0.47   |
| GAIF01010219.1 | 0       | 0       | 0      | 0.34   | 0.47   | 0      |
| GAIF01010222.1 | 0       | 0       | 0      | 0.12   | 0.24   | 0      |
| GAIF01010224.1 | 17.42   | 16.43   | 22.87  | 38.88  | 36.43  | 12.71  |
| GAIF01010225.1 | 0       | 0       | 0      | 0      | 0.28   | 0      |
| GAIF01010226.1 | 0       | 0       | 0      | 0.15   | 0.31   | 0      |
| GAIF01010228.1 | 1.75    | 3.12    | 0.98   | 6.83   | 5.62   | 1.98   |
| GAIF01010229.1 | 0.41    | 0.09    | 0.15   | 0.16   | 0.13   | 0      |

|                |       |        |       |       |        |       |
|----------------|-------|--------|-------|-------|--------|-------|
| GAIF01010230.1 | 0.36  | 0      | 0.11  | 1.34  | 5.93   | 0     |
| GAIF01010231.1 | 9.4   | 7.6    | 13.27 | 16.49 | 11.37  | 51.08 |
| GAIF01010232.1 | 6.81  | 6      | 10.06 | 18.97 | 8.64   | 7.09  |
| GAIF01010233.1 | 0.1   | 0      | 0     | 0.3   | 0.35   | 0.04  |
| GAIF01010235.1 | 28.22 | 25.01  | 40.17 | 25.49 | 8.53   | 11.67 |
| GAIF01010236.1 | 0     | 0      | 0     | 0.04  | 0.15   | 0     |
| GAIF01010237.1 | 0     | 0      | 0     | 0     | 0.05   | 0     |
| GAIF01010238.1 | 0     | 0      | 0     | 0     | 0      | 0.1   |
| GAIF01010239.1 | 0.99  | 0.06   | 0     | 0     | 1.46   | 0.36  |
| GAIF01010241.1 | 0     | 0.08   | 0.16  | 0     | 0      | 0     |
| GAIF01010242.1 | 4.64  | 3.78   | 1.34  | 8.48  | 10.04  | 1.53  |
| GAIF01010243.1 | 1.16  | 0.6    | 0     | 0.57  | 0.99   | 0     |
| GAIF01010244.1 | 0.14  | 0      | 0     | 0     | 0.19   | 0.03  |
| GAIF01010246.1 | 12.5  | 25.12  | 25.33 | 31.51 | 25.92  | 4.1   |
| GAIF01010247.1 | 0     | 0      | 0     | 0     | 0.47   | 0     |
| GAIF01010248.1 | 6.77  | 6.27   | 4.58  | 27.05 | 37.99  | 9.95  |
| GAIF01010249.1 | 73.18 | 107.79 | 95.34 | 19.78 | 34.01  | 19.04 |
| GAIF01010250.1 | 2.42  | 0      | 2.59  | 1.86  | 3.08   | 0.6   |
| GAIF01010251.1 | 7.29  | 12.56  | 11.78 | 11.66 | 4.55   | 5.08  |
| GAIF01010252.1 | 3.16  | 1.5    | 1.41  | 7.33  | 5.7    | 1.41  |
| GAIF01010253.1 | 0.17  | 0.06   | 0     | 0.13  | 0.14   | 0     |
| GAIF01010255.1 | 0     | 0.36   | 0.12  | 0     | 0.26   | 0.12  |
| GAIF01010256.1 | 0.04  | 0.04   | 0     | 0.13  | 0.26   | 0.04  |
| GAIF01010257.1 | 5.45  | 2.07   | 2.88  | 12.18 | 6.8    | 1.26  |
| GAIF01010258.1 | 4.05  | 2.46   | 1.31  | 1.52  | 0.43   | 0.52  |
| GAIF01010259.1 | 13.67 | 15.81  | 10.63 | 69.34 | 81.81  | 2.26  |
| GAIF01010260.1 | 0.57  | 1.4    | 0.38  | 1.5   | 0.91   | 0.13  |
| GAIF01010261.1 | 0     | 0      | 0     | 0     | 0.99   | 0     |
| GAIF01010262.1 | 0.33  | 0.36   | 0.85  | 0.13  | 0.4    | 0     |
| GAIF01010263.1 | 0.25  | 0.05   | 0     | 1.71  | 10.76  | 0     |
| GAIF01010265.1 | 46.74 | 27.81  | 27.26 | 0     | 0      | 0     |
| GAIF01010266.1 | 0.09  | 0.1    | 0     | 0.89  | 2.54   | 0.3   |
| GAIF01010268.1 | 5.91  | 12.85  | 6.18  | 19.03 | 17.03  | 1.91  |
| GAIF01010269.1 | 7.87  | 0.33   | 0.25  | 19.6  | 103.64 | 68.87 |
| GAIF01010271.1 | 1.09  | 2.08   | 1.8   | 0.95  | 0.49   | 0.6   |
| GAIF01010272.1 | 0     | 0      | 0.13  | 0     | 0      | 0     |
| GAIF01010273.1 | 0.08  | 0      | 0     | 0     | 0      | 0     |
| GAIF01010275.1 | 0     | 0.04   | 0.04  | 0     | 0      | 0     |
| GAIF01010276.1 | 0.02  | 0.03   | 0     | 0     | 0.17   | 0     |
| GAIF01010277.1 | 0     | 0.14   | 0.14  | 0.26  | 0      | 0     |
| GAIF01010279.1 | 4.72  | 1.1    | 0.11  | 31.45 | 71.91  | 4.15  |
| GAIF01010280.1 | 16.5  | 18     | 15.28 | 29.43 | 42.6   | 34.62 |
| GAIF01010281.1 | 0     | 0.17   | 0     | 0.09  | 0.37   | 0     |
| GAIF01010282.1 | 0.05  | 0      | 0     | 0     | 0      | 0     |



|                |        |        |        |        |        |        |
|----------------|--------|--------|--------|--------|--------|--------|
| GAIF01010284.1 | 0      | 0      | 0      | 2.64   | 2.15   | 0.51   |
| GAIF01010285.1 | 78.43  | 17.74  | 27.66  | 110.18 | 108.87 | 102.02 |
| GAIF01010286.1 | 0      | 0      | 0.16   | 0      | 0      | 0.08   |
| GAIF01010287.1 | 0      | 0      | 0      | 0      | 0.06   | 0      |
| GAIF01010288.1 | 0.08   | 0      | 0      | 0.09   | 0.19   | 0      |
| GAIF01010289.1 | 11.42  | 9.91   | 14.14  | 15.32  | 10.09  | 9.56   |
| GAIF01010291.1 | 0.87   | 0.3    | 0.55   | 0.42   | 0.77   | 0.5    |
| GAIF01010293.1 | 6.8    | 3.64   | 0.61   | 1.16   | 1.88   | 0.12   |
| GAIF01010294.1 | 0      | 0.32   | 0      | 0      | 0.4    | 0.01   |
| GAIF01010297.1 | 4.41   | 1.38   | 1.06   | 8.17   | 9.7    | 2.93   |
| GAIF01010298.1 | 0      | 0.17   | 0      | 0.43   | 3.02   | 0      |
| GAIF01010299.1 | 0      | 0.74   | 0      | 0      | 0      | 0.25   |
| GAIF01010300.1 | 36.52  | 37.79  | 15.46  | 22.17  | 22.9   | 1.85   |
| GAIF01010301.1 | 0      | 0      | 0      | 0      | 1.7    | 0      |
| GAIF01010302.1 | 47.98  | 59.6   | 80.77  | 131.98 | 55.18  | 70.26  |
| GAIF01010303.1 | 0      | 0.1    | 0      | 0      | 0.11   | 0      |
| GAIF01010304.1 | 0.19   | 0.02   | 0      | 0.62   | 2.47   | 0.11   |
| GAIF01010305.1 | 0      | 0      | 0      | 0.16   | 2.27   | 0      |
| GAIF01010307.1 | 11.42  | 11.54  | 7.22   | 6.16   | 3.95   | 0.95   |
| GAIF01010308.1 | 20.94  | 10.89  | 9.66   | 4.23   | 1.22   | 0.22   |
| GAIF01010309.1 | 4.27   | 8.16   | 5.5    | 32.81  | 15.58  | 2.19   |
| GAIF01010310.1 | 124.14 | 161.99 | 219.43 | 192.62 | 136.16 | 48.59  |
| GAIF01010311.1 | 16.93  | 17.68  | 13.83  | 73.22  | 47.48  | 9.54   |
| GAIF01010312.1 | 0      | 0      | 0      | 0.12   | 0      | 0      |
| GAIF01010313.1 | 0      | 0.87   | 0.16   | 0      | 0      | 0.24   |
| GAIF01010314.1 | 0.52   | 0      | 0      | 0      | 0      | 0      |
| GAIF01010315.1 | 1.18   | 3.74   | 3.72   | 6.97   | 4.27   | 0.4    |
| GAIF01010317.1 | 0.62   | 0.54   | 1.23   | 2.61   | 9.9    | 23.51  |
| GAIF01010318.1 | 6.94   | 5.1    | 7.12   | 12.02  | 17.6   | 15.94  |
| GAIF01010319.1 | 19.06  | 11.04  | 9.19   | 3.51   | 1.5    | 0.79   |
| GAIF01010320.1 | 3.93   | 7.52   | 2.94   | 12.59  | 9.65   | 0.87   |
| GAIF01010321.1 | 0.14   | 1.44   | 1.36   | 0.06   | 0.23   | 0.3    |
| GAIF01010323.1 | 0.04   | 0.04   | 0      | 0      | 0.39   | 0.04   |
| GAIF01010324.1 | 38.53  | 51.35  | 49.68  | 157.74 | 184.54 | 27.45  |
| GAIF01010325.1 | 0.98   | 1.68   | 0      | 2.41   | 2.75   | 0.82   |
| GAIF01010326.1 | 2.59   | 3.22   | 2.87   | 3.25   | 5.1    | 2.03   |
| GAIF01010327.1 | 0      | 0      | 0      | 2.1    | 0      | 0      |
| GAIF01010328.1 | 1.35   | 1.89   | 1.17   | 10.22  | 8.5    | 0.62   |
| GAIF01010330.1 | 0.07   | 0      | 0.08   | 0      | 0      | 0      |
| GAIF01010331.1 | 1.28   | 1.02   | 2.06   | 2.68   | 10.28  | 1.51   |
| GAIF01010333.1 | 0.26   | 0      | 0.29   | 0      | 0      | 0      |
| GAIF01010335.1 | 1.7    | 0.85   | 0.3    | 6.49   | 11.09  | 0.2    |
| GAIF01010336.1 | 0      | 0      | 0      | 0.12   | 0.74   | 0      |
| GAIF01010337.1 | 0.11   | 0      | 0      | 0      | 0      | 0      |

|                |         |        |        |        |         |         |
|----------------|---------|--------|--------|--------|---------|---------|
| GAIF01010338.1 | 0.21    | 0      | 0      | 0.41   | 1.27    | 0       |
| GAIF01010339.1 | 13.34   | 69.14  | 0      | 19.45  | 89.75   | 122.26  |
| GAIF01010342.1 | 0.19    | 0.1    | 0      | 0.26   | 1.82    | 0       |
| GAIF01010343.1 | 0.19    | 0.37   | 0.21   | 1.85   | 1.74    | 0.11    |
| GAIF01010345.1 | 0.25    | 1.23   | 0.69   | 0.15   | 0.3     | 0       |
| GAIF01010346.1 | 6.69    | 4.8    | 2.8    | 6.15   | 5.04    | 3.92    |
| GAIF01010349.1 | 0       | 0      | 0      | 0.05   | 0       | 0       |
| GAIF01010350.1 | 1.81    | 1.65   | 0.18   | 5.57   | 13.16   | 0.05    |
| GAIF01010351.1 | 18.42   | 12.59  | 11.14  | 1.41   | 0.27    | 0.24    |
| GAIF01010352.1 | 6.67    | 3.79   | 0.85   | 4.51   | 9.13    | 0.2     |
| GAIF01010353.1 | 25.4    | 12.48  | 14.93  | 6.29   | 1.66    | 1.29    |
| GAIF01010354.1 | 0       | 0.23   | 0.34   | 0      | 0       | 0       |
| GAIF01010355.1 | 0.3     | 0.11   | 0      | 0.23   | 0.36    | 0.66    |
| GAIF01010356.1 | 0.14    | 0      | 0.47   | 0.17   | 0       | 0       |
| GAIF01010357.1 | 0       | 0      | 0      | 0      | 0.13    | 0       |
| GAIF01010358.1 | 0       | 0      | 0.05   | 0.05   | 0.74    | 0.24    |
| GAIF01010359.1 | 0       | 0      | 0      | 0.05   | 0.1     | 0       |
| GAIF01010360.1 | 0       | 0      | 0      | 0.33   | 0.45    | 0.1     |
| GAIF01010361.1 | 1453.98 | 411.71 | 656.75 | 720.16 | 1136.34 | 4895.06 |
| GAIF01010362.1 | 0       | 0      | 22.05  | 0      | 0       | 0.03    |
| GAIF01010363.1 | 0.22    | 0.36   | 0      | 1.55   | 6.14    | 0.98    |
| GAIF01010364.1 | 18.47   | 15.71  | 14.75  | 28.42  | 22.35   | 10.5    |
| GAIF01010366.1 | 0       | 0      | 0.39   | 0      | 0       | 0.13    |
| GAIF01010367.1 | 0       | 0.32   | 0      | 1.02   | 3.68    | 0       |
| GAIF01010369.1 | 2.11    | 1.44   | 0.61   | 2.28   | 0.7     | 0.21    |
| GAIF01010370.1 | 2.07    | 1.98   | 3.18   | 4.23   | 3.98    | 7.21    |
| GAIF01010371.1 | 0.68    | 0.43   | 0.18   | 2.65   | 7.6     | 0.22    |
| GAIF01010373.1 | 1.2     | 1.1    | 1.31   | 0.96   | 0.22    | 0.1     |
| GAIF01010375.1 | 20.89   | 26.11  | 13.99  | 34.86  | 22.66   | 5.37    |
| GAIF01010376.1 | 0       | 0      | 0      | 0      | 0       | 0.02    |
| GAIF01010377.1 | 0       | 0      | 0      | 0      | 0       | 0.08    |
| GAIF01010378.1 | 0       | 0      | 0      | 0      | 0.14    | 0       |
| GAIF01010381.1 | 0       | 0.08   | 0      | 0.08   | 0       | 0.15    |
| GAIF01010382.1 | 3.32    | 1.85   | 0.16   | 7.63   | 12.08   | 0.55    |
| GAIF01010383.1 | 0.83    | 0.06   | 0      | 1.61   | 4.48    | 2.09    |
| GAIF01010384.1 | 0.14    | 0.02   | 0.01   | 0.68   | 6.66    | 0.66    |
| GAIF01010385.1 | 0.21    | 0.62   | 0      | 1.11   | 1.1     | 0.13    |
| GAIF01010386.1 | 0.17    | 0.09   | 0      | 3.1    | 6.42    | 0.66    |
| GAIF01010387.1 | 0.2     | 0.04   | 0      | 1.39   | 6.75    | 0.04    |
| GAIF01010388.1 | 0.17    | 0.15   | 0.11   | 0.43   | 1.74    | 0.02    |
| GAIF01010390.1 | 0       | 0      | 0      | 0.05   | 0.05    | 0       |
| GAIF01010391.1 | 0       | 2.45   | 4.75   | 0      | 0       | 0       |
| GAIF01010393.1 | 0       | 0      | 0      | 0      | 0.13    | 0       |
| GAIF01010394.1 | 6.15    | 8.63   | 8.42   | 13.7   | 9.38    | 3.2     |

|                |       |       |       |        |        |        |
|----------------|-------|-------|-------|--------|--------|--------|
| GAIF01010395.1 | 13.28 | 15.8  | 15.22 | 8.98   | 8.06   | 3.82   |
| GAIF01010397.1 | 33.25 | 51.25 | 46.96 | 59.64  | 53.19  | 40.18  |
| GAIF01010398.1 | 21.83 | 2.83  | 28.32 | 9.75   | 30.31  | 0.08   |
| GAIF01010399.1 | 0     | 0.15  | 0     | 0      | 0.16   | 0      |
| GAIF01010400.1 | 0     | 0.35  | 0     | 0      | 0.78   | 1.81   |
| GAIF01010403.1 | 0     | 0     | 0     | 0      | 0.11   | 0      |
| GAIF01010405.1 | 25.7  | 17.63 | 14.76 | 67.96  | 87.98  | 8.57   |
| GAIF01010406.1 | 4.11  | 1.22  | 0     | 24.49  | 77.44  | 20.1   |
| GAIF01010407.1 | 0.3   | 0.13  | 0     | 0.55   | 1.04   | 0.06   |
| GAIF01010408.1 | 1.3   | 0.4   | 0.2   | 3.46   | 10.86  | 0.92   |
| GAIF01010409.1 | 0     | 0     | 0     | 0.11   | 0.6    | 0      |
| GAIF01010410.1 | 0     | 11.4  | 0     | 0      | 0      | 0      |
| GAIF01010411.1 | 0     | 0     | 0     | 0.73   | 3.79   | 0.35   |
| GAIF01010412.1 | 4.2   | 5.32  | 3.79  | 4.51   | 3.12   | 0.89   |
| GAIF01010413.1 | 0     | 0.19  | 0     | 0      | 0.11   | 0      |
| GAIF01010414.1 | 12.07 | 12.39 | 9.38  | 14.35  | 21.63  | 4.9    |
| GAIF01010416.1 | 59.15 | 37.8  | 91.55 | 135.71 | 174.54 | 328.86 |
| GAIF01010417.1 | 0.91  | 0.1   | 0     | 0      | 0.05   | 0      |
| GAIF01010418.1 | 0     | 0.13  | 0     | 0.68   | 0.79   | 0      |
| GAIF01010419.1 | 0     | 0     | 0     | 0.05   | 0.1    | 0      |
| GAIF01010420.1 | 0     | 0     | 0     | 0      | 0.02   | 0      |
| GAIF01010422.1 | 0.91  | 0.4   | 0.2   | 0.32   | 0      | 0.1    |
| GAIF01010425.1 | 0.11  | 0.12  | 0     | 0.39   | 1.35   | 0      |
| GAIF01010426.1 | 0     | 0     | 0     | 0      | 0.43   | 0      |
| GAIF01010427.1 | 6.54  | 8.62  | 9.13  | 22.4   | 12.74  | 8.01   |
| GAIF01010428.1 | 0     | 0     | 0.12  | 0      | 1.23   | 0      |
| GAIF01010431.1 | 0     | 0.51  | 0     | 0      | 0.56   | 0      |
| GAIF01010433.1 | 8.87  | 7.25  | 10.77 | 4.88   | 5.49   | 7.65   |
| GAIF01010434.1 | 1.37  | 0.92  | 0.53  | 6.09   | 14.56  | 0.87   |
| GAIF01010435.1 | 72.86 | 42.38 | 28.56 | 96.86  | 97.42  | 19.38  |
| GAIF01010436.1 | 0     | 0     | 0.25  | 0      | 0      | 0      |
| GAIF01010437.1 | 1.33  | 0.07  | 0.07  | 6.04   | 16.28  | 0.61   |
| GAIF01010438.1 | 0     | 0     | 0     | 2.69   | 1.26   | 0      |
| GAIF01010439.1 | 0.77  | 0.17  | 0     | 1.08   | 4.29   | 8.37   |
| GAIF01010440.1 | 6.11  | 5.09  | 1.82  | 0.43   | 0.13   | 1.22   |
| GAIF01010441.1 | 0.06  | 0     | 0     | 0.34   | 0.35   | 0      |
| GAIF01010442.1 | 0.91  | 0.16  | 0.21  | 0.28   | 0.58   | 0.11   |
| GAIF01010443.1 | 0     | 0     | 0.03  | 0      | 0      | 0      |
| GAIF01010444.1 | 0     | 0     | 0     | 0.03   | 0      | 0.05   |
| GAIF01010445.1 | 0     | 0     | 0     | 1.46   | 7      | 0      |
| GAIF01010449.1 | 57.76 | 34.09 | 14.02 | 156.7  | 183.79 | 19.08  |
| GAIF01010450.1 | 23.37 | 5.03  | 3.18  | 3.22   | 2      | 1.02   |
| GAIF01010451.1 | 0     | 0.05  | 0.05  | 0.12   | 0.18   | 0      |
| GAIF01010454.1 | 0     | 0     | 0     | 0.36   | 2.82   | 0.04   |

|                |         |         |         |         |         |         |
|----------------|---------|---------|---------|---------|---------|---------|
| GAIF01010455.1 | 0       | 0.27    | 0       | 0       | 0       | 0       |
| GAIF01010456.1 | 2.09    | 0       | 0       | 7.11    | 20.88   | 2.01    |
| GAIF01010457.1 | 0       | 0       | 0       | 0       | 0.12    | 0.11    |
| GAIF01010458.1 | 6       | 2.51    | 0.13    | 6.03    | 14.57   | 1.91    |
| GAIF01010459.1 | 6.71    | 9.5     | 12.34   | 55.52   | 25.95   | 11.92   |
| GAIF01010460.1 | 3.13    | 0       | 0       | 3.63    | 23.17   | 22.03   |
| GAIF01010461.1 | 0.27    | 0.1     | 0       | 0.2     | 0.84    | 0.29    |
| GAIF01010463.1 | 0.45    | 0.25    | 0       | 1.57    | 2.85    | 0       |
| GAIF01010466.1 | 0       | 0.05    | 0       | 0.05    | 0       | 0       |
| GAIF01010467.1 | 2.87    | 1.44    | 1.13    | 4.34    | 1.72    | 0.47    |
| GAIF01010468.1 | 0       | 0       | 0       | 0       | 0.05    | 0       |
| GAIF01010470.1 | 0       | 0       | 0       | 0       | 0.2     | 0.05    |
| GAIF01010472.1 | 87.86   | 115.27  | 157.69  | 117.02  | 113.03  | 102.48  |
| GAIF01010473.1 | 0       | 0       | 0       | 0       | 0.45    | 0       |
| GAIF01010475.1 | 0.66    | 0.18    | 0.27    | 0       | 1.39    | 1.46    |
| GAIF01010476.1 | 0       | 0.08    | 0       | 0.17    | 0.53    | 0       |
| GAIF01010479.1 | 0.28    | 0       | 0       | 1.64    | 4.42    | 2.39    |
| GAIF01010480.1 | 39.96   | 37      | 58.73   | 133.21  | 78.45   | 72.42   |
| GAIF01010481.1 | 115.89  | 137.95  | 341.01  | 92.36   | 77.37   | 234.27  |
| GAIF01010484.1 | 8.71    | 10.6    | 11.13   | 30.32   | 16.1    | 9.02    |
| GAIF01010485.1 | 12.08   | 6.57    | 5.49    | 23.55   | 18.69   | 2.99    |
| GAIF01010486.1 | 0       | 4.4     | 1.11    | 0       | 0       | 0       |
| GAIF01010487.1 | 0.08    | 0.09    | 0       | 0.09    | 0.1     | 0.09    |
| GAIF01010490.1 | 1.43    | 0.76    | 0.84    | 11.32   | 6.96    | 1.85    |
| GAIF01010491.1 | 54.86   | 81.42   | 137.46  | 62.85   | 57.66   | 40.69   |
| GAIF01010492.1 | 0       | 0       | 0       | 0       | 0.06    | 0       |
| GAIF01010494.1 | 0.03    | 0       | 0       | 0.1     | 0.18    | 0       |
| GAIF01010495.1 | 3.91    | 0       | 8.36    | 7.71    | 4.92    | 0       |
| GAIF01010500.1 | 0.06    | 0.07    | 0       | 0       | 0.07    | 0       |
| GAIF01010501.1 | 1.8     | 1.45    | 1.45    | 1.85    | 0       | 0       |
| GAIF01010502.1 | 2002.55 | 872.35  | 588.24  | 1216.12 | 1741.55 | 5343.82 |
| GAIF01010504.1 | 0       | 3.78    | 1.69    | 1.7     | 1.41    | 0.72    |
| GAIF01010505.1 | 0.33    | 0       | 0.12    | 1.41    | 2.92    | 1.22    |
| GAIF01010506.1 | 0.21    | 0.15    | 0.08    | 0.24    | 0.33    | 0.08    |
| GAIF01010507.1 | 5.81    | 0       | 5.81    | 0.55    | 0       | 4.65    |
| GAIF01010510.1 | 0       | 0       | 0       | 0       | 0.15    | 0       |
| GAIF01010511.1 | 0       | 0       | 0       | 0       | 1.26    | 0       |
| GAIF01010512.1 | 23      | 27.94   | 26.59   | 22.31   | 15.49   | 6.1     |
| GAIF01010513.1 | 13.83   | 18.44   | 19.54   | 20.41   | 14.42   | 5.06    |
| GAIF01010514.1 | 0.35    | 0       | 0       | 2.05    | 3.83    | 0.13    |
| GAIF01010515.1 | 744.69  | 1136.41 | 2853.19 | 1288.54 | 1137.95 | 2610.64 |
| GAIF01010516.1 | 0       | 0.09    | 0       | 0.1     | 0       | 0       |
| GAIF01010520.1 | 0       | 0       | 0       | 0       | 0.15    | 0       |
| GAIF01010521.1 | 0       | 0       | 0       | 0.27    | 2.43    | 0       |

|                |         |         |         |        |        |        |
|----------------|---------|---------|---------|--------|--------|--------|
| GAIF01010523.1 | 0.9     | 0       | 0.15    | 0.29   | 0.68   | 2.45   |
| GAIF01010524.1 | 0       | 0       | 0       | 0      | 0.41   | 0      |
| GAIF01010525.1 | 0.15    | 0.21    | 0.06    | 1.21   | 3.99   | 0.22   |
| GAIF01010526.1 | 18.14   | 23.29   | 13.22   | 39.61  | 10.02  | 27.61  |
| GAIF01010527.1 | 0       | 0       | 0.04    | 0      | 0.23   | 0      |
| GAIF01010528.1 | 13.09   | 26.69   | 22.84   | 38.18  | 28.04  | 7.73   |
| GAIF01010529.1 | 70.38   | 73.89   | 59.26   | 33.72  | 40.41  | 69.28  |
| GAIF01010530.1 | 1.9     | 1.82    | 2.59    | 11.23  | 74.02  | 3.27   |
| GAIF01010531.1 | 3.37    | 1.68    | 0.89    | 9.12   | 25.8   | 1.75   |
| GAIF01010532.1 | 0       | 0       | 0       | 1.6    | 0      | 0.17   |
| GAIF01010536.1 | 0       | 0       | 0       | 0.08   | 0.19   | 0      |
| GAIF01010537.1 | 0.22    | 0.39    | 0.24    | 0      | 0.13   | 0      |
| GAIF01010538.1 | 14.04   | 5.7     | 7.79    | 29.94  | 33.99  | 16.81  |
| GAIF01010540.1 | 1.88    | 1.02    | 1.93    | 9.82   | 5.23   | 1.68   |
| GAIF01010542.1 | 0.06    | 0.56    | 0.28    | 0.22   | 0.92   | 0.21   |
| GAIF01010545.1 | 0.32    | 0       | 0.18    | 3.67   | 16.99  | 0.09   |
| GAIF01010547.1 | 0.34    | 0       | 0       | 0.04   | 0.19   | 0.49   |
| GAIF01010548.1 | 0       | 0       | 0.13    | 0      | 0      | 0      |
| GAIF01010549.1 | 0.03    | 0       | 0       | 0      | 0.04   | 0.03   |
| GAIF01010550.1 | 0       | 1.1     | 4.85    | 0      | 0      | 0.77   |
| GAIF01010551.1 | 0       | 0       | 0       | 0      | 0.19   | 0      |
| GAIF01010552.1 | 29.85   | 48.1    | 72.08   | 50.17  | 46.71  | 11.31  |
| GAIF01010554.1 | 0.52    | 0.28    | 1.15    | 0.76   | 0.31   | 0.14   |
| GAIF01010555.1 | 0       | 0       | 0       | 0      | 0.17   | 0      |
| GAIF01010556.1 | 0.3     | 0       | 0       | 0.53   | 6      | 1.25   |
| GAIF01010557.1 | 0.09    | 0       | 0       | 0      | 0      | 0      |
| GAIF01010558.1 | 0.08    | 0       | 0       | 0.1    | 0      | 0      |
| GAIF01010559.1 | 0       | 0.02    | 0       | 0      | 0      | 0      |
| GAIF01010560.1 | 0.13    | 0       | 0       | 0      | 0      | 0.85   |
| GAIF01010561.1 | 0.05    | 0       | 0       | 0.06   | 0.29   | 0      |
| GAIF01010562.1 | 2.28    | 0.83    | 0.16    | 2.77   | 16.8   | 2.47   |
| GAIF01010563.1 | 0       | 0.08    | 0       | 0      | 0.26   | 0      |
| GAIF01010564.1 | 1780.16 | 1957.82 | 2867.49 | 1454.2 | 1010.3 | 914.16 |
| GAIF01010565.1 | 0       | 1.62    | 0.37    | 0      | 0.04   | 0.04   |
| GAIF01010567.1 | 12.14   | 8.17    | 4.7     | 10.2   | 5.56   | 4.08   |
| GAIF01010568.1 | 0       | 0       | 0       | 0.03   | 0      | 0      |
| GAIF01010569.1 | 3.79    | 3.86    | 3.91    | 8.65   | 3.41   | 4.67   |
| GAIF01010570.1 | 0.41    | 0.31    | 0       | 0      | 2.67   | 0.46   |
| GAIF01010572.1 | 0       | 0       | 0.14    | 0      | 0.77   | 0      |
| GAIF01010575.1 | 11.09   | 10.31   | 10.11   | 5.89   | 6.24   | 4.17   |
| GAIF01010576.1 | 0       | 0       | 0       | 0      | 0.24   | 0.08   |
| GAIF01010577.1 | 275.57  | 199.02  | 123.44  | 284.77 | 238.84 | 97.85  |
| GAIF01010579.1 | 0       | 0       | 0       | 0      | 0.43   | 0      |
| GAIF01010582.1 | 0       | 0.24    | 0.58    | 0      | 0      | 0      |

|                |       |       |       |        |       |       |
|----------------|-------|-------|-------|--------|-------|-------|
| GAIF01010583.1 | 1.85  | 1.81  | 0     | 6.66   | 14.24 | 0.41  |
| GAIF01010584.1 | 1.15  | 0.27  | 0     | 0.86   | 2.28  | 0     |
| GAIF01010585.1 | 0.6   | 0.25  | 0.15  | 0.75   | 2.73  | 0.05  |
| GAIF01010586.1 | 15.09 | 15.68 | 12.99 | 21.97  | 12.91 | 7.45  |
| GAIF01010587.1 | 0     | 0     | 0     | 0      | 0.5   | 0     |
| GAIF01010588.1 | 0     | 0     | 0     | 0      | 0.16  | 0     |
| GAIF01010590.1 | 5.74  | 9.16  | 4.27  | 21.59  | 27.54 | 1.22  |
| GAIF01010591.1 | 4.68  | 2.2   | 0.99  | 0.31   | 0.32  | 0.42  |
| GAIF01010592.1 | 48.48 | 39.32 | 28.52 | 107.67 | 78    | 16.43 |
| GAIF01010593.1 | 3.66  | 0.4   | 0.4   | 7.44   | 26.86 | 0.2   |
| GAIF01010594.1 | 15.17 | 18.17 | 6.74  | 22.68  | 18.66 | 2.33  |
| GAIF01010598.1 | 8.04  | 8.4   | 9     | 6.91   | 4.74  | 5.03  |
| GAIF01010599.1 | 0.31  | 0     | 0.16  | 0      | 0.41  | 0.15  |
| GAIF01010601.1 | 2.14  | 1.21  | 0     | 2.85   | 5.04  | 0.37  |
| GAIF01010602.1 | 13.62 | 11.3  | 10.1  | 13.68  | 11.76 | 5.3   |
| GAIF01010604.1 | 0     | 1.02  | 0.41  | 0      | 0     | 0     |
| GAIF01010607.1 | 0.61  | 0     | 0.59  | 3.81   | 0.97  | 3.49  |
| GAIF01010608.1 | 1.97  | 2.27  | 0.97  | 1.08   | 2.97  | 0.3   |
| GAIF01010609.1 | 0     | 0     | 0     | 0      | 0.16  | 0     |
| GAIF01010610.1 | 0     | 0     | 0     | 0      | 0.22  | 0     |
| GAIF01010615.1 | 0     | 0.42  | 0.19  | 0      | 0.5   | 0.04  |
| GAIF01010617.1 | 4.43  | 3.18  | 2.69  | 5.66   | 2.83  | 2.01  |
| GAIF01010618.1 | 25.41 | 25.21 | 16.39 | 46.72  | 30.56 | 19.6  |
| GAIF01010619.1 | 1.25  | 1.26  | 1.37  | 5.68   | 2.57  | 1.27  |
| GAIF01010620.1 | 0     | 0.1   | 0     | 0      | 0     | 0     |
| GAIF01010624.1 | 0     | 0     | 0.04  | 0      | 0     | 0     |
| GAIF01010625.1 | 7.61  | 13.21 | 5.99  | 12.88  | 13.89 | 4.67  |
| GAIF01010626.1 | 0.4   | 0.25  | 0     | 0.79   | 0.9   | 0.2   |
| GAIF01010627.1 | 0     | 0     | 0     | 0      | 0.26  | 0     |
| GAIF01010628.1 | 0.05  | 0.02  | 0.02  | 0.13   | 0.11  | 0.15  |
| GAIF01010629.1 | 0     | 0     | 0     | 0      | 0.36  | 0     |
| GAIF01010630.1 | 0.94  | 0.75  | 1.27  | 0.24   | 0.44  | 0.75  |
| GAIF01010633.1 | 11.02 | 12.95 | 12.84 | 6.17   | 0     | 1.1   |
| GAIF01010634.1 | 0.11  | 0     | 0     | 0.12   | 0.25  | 0     |
| GAIF01010635.1 | 0     | 0.03  | 0     | 0      | 0     | 0     |
| GAIF01010636.1 | 0     | 0     | 0     | 0      | 0     | 0.22  |
| GAIF01010637.1 | 0     | 0.12  | 0.25  | 0      | 0     | 0     |
| GAIF01010638.1 | 0.87  | 0.12  | 0.12  | 0.25   | 0.07  | 0     |
| GAIF01010639.1 | 0.32  | 0.53  | 0.08  | 1.21   | 3.76  | 0.15  |
| GAIF01010640.1 | 0.04  | 0     | 0     | 0.08   | 0.39  | 0.07  |
| GAIF01010642.1 | 0     | 0     | 0     | 0      | 0.36  | 0     |
| GAIF01010643.1 | 9.5   | 7.77  | 6.83  | 9.13   | 5.84  | 4.09  |
| GAIF01010645.1 | 11.4  | 12.44 | 14.88 | 7.98   | 4.69  | 3.99  |
| GAIF01010646.1 | 1.52  | 1.62  | 1.67  | 3.5    | 3.75  | 3.62  |

|                |        |        |        |        |        |         |
|----------------|--------|--------|--------|--------|--------|---------|
| GAIF01010647.1 | 0.54   | 0.69   | 0.5    | 0.11   | 0.11   | 0       |
| GAIF01010648.1 | 4.84   | 7.18   | 3.26   | 4.09   | 4.9    | 0       |
| GAIF01010649.1 | 0      | 0.36   | 0      | 0.55   | 0.86   | 0       |
| GAIF01010650.1 | 0.63   | 0.17   | 0.51   | 1.18   | 1.13   | 0.17    |
| GAIF01010651.1 | 194.79 | 155.42 | 233.5  | 612.1  | 330.03 | 1834.64 |
| GAIF01010653.1 | 0.9    | 0      | 0      | 1.67   | 3.74   | 4.47    |
| GAIF01010655.1 | 12.62  | 2.31   | 0.92   | 87.58  | 276.78 | 0.83    |
| GAIF01010656.1 | 16.55  | 11.98  | 11.06  | 20.02  | 12.29  | 11.43   |
| GAIF01010657.1 | 0.19   | 0.08   | 0.16   | 0.04   | 0.18   | 0.02    |
| GAIF01010658.1 | 0      | 2.24   | 0      | 0      | 0      | 0       |
| GAIF01010659.1 | 0.17   | 0.19   | 0      | 0.79   | 0.41   | 0       |
| GAIF01010660.1 | 0.3    | 0.2    | 0.12   | 0.04   | 0.04   | 0.15    |
| GAIF01010661.1 | 15.84  | 3.19   | 2.58   | 0      | 0      | 0       |
| GAIF01010662.1 | 4.88   | 0.42   | 0.19   | 0      | 0.5    | 0.04    |
| GAIF01010665.1 | 0.9    | 1.33   | 0.55   | 0.79   | 0.16   | 0       |
| GAIF01010667.1 | 0.15   | 0.33   | 0      | 0.71   | 0.55   | 0       |
| GAIF01010668.1 | 6.31   | 7.25   | 4.66   | 13.65  | 15.46  | 1.87    |
| GAIF01010669.1 | 83.14  | 59.57  | 54.59  | 117.21 | 69.48  | 59.11   |
| GAIF01010670.1 | 0.26   | 0      | 0      | 0      | 0      | 0       |
| GAIF01010671.1 | 0      | 0      | 0      | 0      | 0.37   | 0       |
| GAIF01010672.1 | 0.19   | 0.09   | 0.09   | 0.06   | 0.03   | 0       |
| GAIF01010673.1 | 1.8    | 1.11   | 0.52   | 6.73   | 7.44   | 1.21    |
| GAIF01010677.1 | 0.06   | 0      | 0      | 0.07   | 0.28   | 0       |
| GAIF01010679.1 | 25.47  | 37.59  | 37.1   | 37.4   | 21.2   | 7.88    |
| GAIF01010682.1 | 0.18   | 0      | 0      | 0      | 0      | 0       |
| GAIF01010683.1 | 3.51   | 0.71   | 0      | 8.78   | 15.93  | 2.79    |
| GAIF01010684.1 | 0      | 0      | 0      | 0.14   | 0      | 0       |
| GAIF01010685.1 | 11.35  | 10.53  | 4.94   | 27.31  | 30.38  | 1.43    |
| GAIF01010686.1 | 14.51  | 30.12  | 8.38   | 9.56   | 7.8    | 3.54    |
| GAIF01010687.1 | 0      | 0.48   | 0.19   | 0      | 0      | 0.05    |
| GAIF01010689.1 | 0      | 0      | 0      | 0      | 0.39   | 0       |
| GAIF01010690.1 | 117.98 | 134.26 | 212.72 | 198.19 | 141.02 | 173.14  |
| GAIF01010691.1 | 0.12   | 0      | 0      | 0.57   | 2.55   | 0.94    |
| GAIF01010693.1 | 0      | 0      | 0      | 0      | 0      | 0.06    |
| GAIF01010695.1 | 31.02  | 11.26  | 9.19   | 45.54  | 72.16  | 30.53   |
| GAIF01010696.1 | 8.99   | 7      | 7.3    | 4.56   | 4.72   | 6.69    |
| GAIF01010699.1 | 0.13   | 0      | 0      | 0.54   | 4.84   | 0       |
| GAIF01010700.1 | 0.11   | 0.26   | 0.53   | 0.44   | 0.59   | 0.69    |
| GAIF01010701.1 | 4.33   | 6.84   | 13.93  | 10.54  | 8.99   | 3.87    |
| GAIF01010702.1 | 0      | 0      | 0      | 0.15   | 1.14   | 0       |
| GAIF01010704.1 | 0.9    | 0.33   | 0      | 3.75   | 22.03  | 1.24    |
| GAIF01010705.1 | 115.99 | 53.65  | 52.96  | 150.19 | 169.55 | 86.43   |
| GAIF01010706.1 | 15.76  | 6.42   | 4.24   | 31.63  | 33.53  | 5.23    |
| GAIF01010707.1 | 0.02   | 0.27   | 0.02   | 0.18   | 0.28   | 0.01    |

|                |        |        |        |        |        |        |
|----------------|--------|--------|--------|--------|--------|--------|
| GAIF01010708.1 | 4.5    | 6.68   | 2.68   | 19.37  | 19.16  | 0.91   |
| GAIF01010710.1 | 9.99   | 14.09  | 10.23  | 1.57   | 0.65   | 0.45   |
| GAIF01010711.1 | 0.09   | 0.14   | 0.03   | 0.13   | 1.35   | 0      |
| GAIF01010712.1 | 16.37  | 7.76   | 6.05   | 37.26  | 18.13  | 8.93   |
| GAIF01010713.1 | 6.73   | 6.12   | 4.79   | 10.37  | 5.11   | 1.95   |
| GAIF01010715.1 | 0.23   | 0      | 0      | 0.26   | 1.64   | 0      |
| GAIF01010716.1 | 0      | 0      | 0      | 0.09   | 0      | 0      |
| GAIF01010717.1 | 60.87  | 27.57  | 10.31  | 3.17   | 2.32   | 0.48   |
| GAIF01010721.1 | 0      | 0      | 0      | 0.1    | 0.2    | 0      |
| GAIF01010722.1 | 424.34 | 295.66 | 137.06 | 62.28  | 58.65  | 18.42  |
| GAIF01010723.1 | 0      | 0      | 0.01   | 0      | 0      | 0      |
| GAIF01010725.1 | 21.35  | 21.32  | 8.51   | 5.97   | 4.29   | 0.1    |
| GAIF01010727.1 | 0.07   | 0.03   | 0      | 0.68   | 0      | 0.24   |
| GAIF01010728.1 | 0      | 22.79  | 93.77  | 1.45   | 6.01   | 164.07 |
| GAIF01010729.1 | 0      | 0.07   | 0      | 0.29   | 0.45   | 0      |
| GAIF01010730.1 | 156.69 | 52.78  | 5.94   | 174.85 | 324.34 | 49.07  |
| GAIF01010731.1 | 0.52   | 0      | 0.46   | 0.54   | 0.44   | 0.36   |
| GAIF01010732.1 | 3.47   | 1.63   | 1.55   | 0.61   | 0.39   | 0.16   |
| GAIF01010735.1 | 0.69   | 0.25   | 0.13   | 3.88   | 18.73  | 1.91   |
| GAIF01010736.1 | 0.69   | 0.5    | 0.38   | 1.86   | 3.86   | 0.76   |
| GAIF01010737.1 | 10.01  | 12.01  | 11.94  | 14.56  | 13.17  | 4.26   |
| GAIF01010738.1 | 15.18  | 12.84  | 6.01   | 39.43  | 42.55  | 9.36   |
| GAIF01010740.1 | 0.42   | 0.13   | 0.33   | 0      | 0.07   | 0      |
| GAIF01010741.1 | 0.1    | 0.31   | 0      | 0.32   | 0.34   | 0      |
| GAIF01010743.1 | 0.17   | 0      | 0      | 0.59   | 0.61   | 0      |
| GAIF01010745.1 | 0      | 0      | 0      | 0      | 0.14   | 0      |
| GAIF01010746.1 | 0.14   | 1.39   | 0.22   | 1.6    | 1.1    | 0.07   |
| GAIF01010747.1 | 0.4    | 3.67   | 2.77   | 0      | 0.43   | 0.91   |
| GAIF01010748.1 | 0.52   | 0.16   | 0.08   | 2.43   | 13.65  | 0.33   |
| GAIF01010749.1 | 0.02   | 0.09   | 0.05   | 0.41   | 2.04   | 0.07   |
| GAIF01010750.1 | 4.32   | 1.73   | 0.78   | 3.87   | 1.58   | 1.27   |
| GAIF01010753.1 | 0.12   | 0.1    | 0.07   | 1.95   | 6.09   | 0.33   |
| GAIF01010755.1 | 6.11   | 6.4    | 12.26  | 2.75   | 3.39   | 6.46   |
| GAIF01010756.1 | 9.79   | 13.6   | 3.04   | 4.67   | 3.92   | 1.38   |
| GAIF01010757.1 | 39.67  | 20.19  | 10.19  | 27.28  | 24.95  | 4.67   |
| GAIF01010758.1 | 30.24  | 54.09  | 43.09  | 74.19  | 43.05  | 7.51   |
| GAIF01010759.1 | 0.96   | 0.57   | 0.88   | 0.22   | 0      | 0.33   |
| GAIF01010760.1 | 0.1    | 0      | 0      | 0      | 0.5    | 0      |
| GAIF01010763.1 | 35.07  | 17.78  | 13.46  | 18.69  | 11.6   | 3.51   |
| GAIF01010765.1 | 0.1    | 2.65   | 1.42   | 0      | 0.24   | 0      |
| GAIF01010766.1 | 75.31  | 40.16  | 42.56  | 98.02  | 46.2   | 25.78  |
| GAIF01010767.1 | 0.66   | 1.33   | 26.9   | 26.33  | 0.01   | 16.91  |
| GAIF01010768.1 | 0      | 0      | 0      | 0.06   | 0.59   | 1.56   |
| GAIF01010770.1 | 0      | 0      | 0.21   | 0      | 0      | 0.26   |



|                |         |         |         |         |        |         |
|----------------|---------|---------|---------|---------|--------|---------|
| GAIF01010771.1 | 0       | 0.06    | 0       | 0       | 0.07   | 0       |
| GAIF01010773.1 | 3.41    | 4.78    | 4.41    | 10.08   | 8.39   | 2.22    |
| GAIF01010774.1 | 0       | 1.08    | 0.6     | 0       | 0.16   | 1.2     |
| GAIF01010775.1 | 0       | 0       | 0       | 0       | 0.16   | 0       |
| GAIF01010777.1 | 0.14    | 0       | 0       | 0.08    | 0.2    | 0       |
| GAIF01010779.1 | 1.34    | 0.49    | 0       | 0.73    | 0.43   | 0.49    |
| GAIF01010780.1 | 0       | 0       | 0       | 0.98    | 4.76   | 0       |
| GAIF01010782.1 | 0       | 0       | 0       | 0       | 0.19   | 0       |
| GAIF01010783.1 | 0.38    | 0       | 0.05    | 0.71    | 0.35   | 0       |
| GAIF01010784.1 | 7.82    | 10.8    | 6.65    | 1.64    | 2.63   | 0.39    |
| GAIF01010785.1 | 0.12    | 0       | 0       | 0       | 0.28   | 0       |
| GAIF01010786.1 | 1.67    | 0.21    | 0.08    | 6.75    | 32.21  | 2.05    |
| GAIF01010788.1 | 0       | 0       | 0       | 0       | 0.55   | 0       |
| GAIF01010789.1 | 1.39    | 1.73    | 0.55    | 4.74    | 5.87   | 0.93    |
| GAIF01010791.1 | 9.56    | 3.47    | 1.32    | 11.43   | 13.28  | 4.18    |
| GAIF01010792.1 | 0       | 0.03    | 0       | 0.25    | 0.26   | 0       |
| GAIF01010793.1 | 0.17    | 0       | 0       | 0.33    | 0.03   | 0       |
| GAIF01010795.1 | 0       | 1.89    | 3.63    | 0       | 0      | 3.26    |
| GAIF01010796.1 | 0       | 0       | 0       | 0       | 0.06   | 0       |
| GAIF01010797.1 | 7.18    | 5.73    | 4.16    | 26.97   | 18.23  | 2.87    |
| GAIF01010798.1 | 0       | 0       | 0       | 0.2     | 0.84   | 0       |
| GAIF01010799.1 | 23.89   | 15.74   | 24.23   | 9.03    | 4.48   | 8.32    |
| GAIF01010801.1 | 17.11   | 18.77   | 24.99   | 45.42   | 28.09  | 17.38   |
| GAIF01010803.1 | 0.06    | 0.14    | 0       | 0.42    | 1.34   | 0       |
| GAIF01010804.1 | 13.6    | 20.02   | 13.79   | 17.98   | 12.21  | 2.85    |
| GAIF01010805.1 | 96.07   | 145.13  | 205.83  | 138.66  | 110.32 | 77.01   |
| GAIF01010806.1 | 0.21    | 0.08    | 0       | 0.08    | 0      | 0       |
| GAIF01010807.1 | 0.25    | 0.3     | 0.43    | 0.06    | 0.16   | 0.09    |
| GAIF01010809.1 | 10.9    | 8.85    | 10.39   | 22.79   | 26.63  | 8.48    |
| GAIF01010810.1 | 0.69    | 0.38    | 0       | 0.44    | 0.22   | 0       |
| GAIF01010811.1 | 0.15    | 0.16    | 0       | 0       | 0.06   | 0       |
| GAIF01010812.1 | 0       | 0.08    | 0       | 0       | 0.08   | 0       |
| GAIF01010814.1 | 4.82    | 7.79    | 6.35    | 5.72    | 4.68   | 1.94    |
| GAIF01010815.1 | 6.45    | 11.8    | 9.74    | 16.95   | 10.62  | 2.38    |
| GAIF01010816.1 | 2142.43 | 4019.23 | 7366.89 | 1371.24 | 819.85 | 1989.61 |
| GAIF01010818.1 | 69.77   | 39.84   | 20.49   | 60.43   | 45.26  | 41.29   |
| GAIF01010819.1 | 0       | 5.16    | 0.45    | 7.09    | 5.88   | 1.3     |
| GAIF01010820.1 | 0       | 2.33    | 9.58    | 0.17    | 0.17   | 4.1     |
| GAIF01010822.1 | 26.81   | 20.2    | 20.81   | 32.53   | 40.62  | 14.19   |
| GAIF01010823.1 | 577.24  | 219.17  | 267.5   | 172.4   | 164.38 | 307.91  |
| GAIF01010824.1 | 230.78  | 69.43   | 56.47   | 149.66  | 83.29  | 114.46  |
| GAIF01010825.1 | 0.08    | 0.08    | 0       | 0       | 0      | 0       |
| GAIF01010827.1 | 0.19    | 0.07    | 0.56    | 0       | 0.08   | 0       |
| GAIF01010828.1 | 18.66   | 11.93   | 22.7    | 24.82   | 23.63  | 50.13   |

|                |       |        |        |       |        |       |
|----------------|-------|--------|--------|-------|--------|-------|
| GAIF01010831.1 | 0     | 0.06   | 0      | 0     | 0      | 0     |
| GAIF01010832.1 | 3.04  | 0.71   | 0      | 14.52 | 34.8   | 1.68  |
| GAIF01010834.1 | 16.95 | 22.51  | 8.76   | 73.04 | 57.65  | 2.75  |
| GAIF01010836.1 | 2.25  | 1.35   | 0.13   | 17.49 | 49.61  | 0.07  |
| GAIF01010837.1 | 33.66 | 48.8   | 43.58  | 94.84 | 90.02  | 12.2  |
| GAIF01010840.1 | 0     | 0.13   | 1.33   | 0     | 0      | 0     |
| GAIF01010841.1 | 0     | 0      | 0      | 0.25  | 0.79   | 0     |
| GAIF01010844.1 | 170.9 | 200.57 | 161.54 | 35.81 | 28.34  | 7.05  |
| GAIF01010845.1 | 4.53  | 1.03   | 0.61   | 5.26  | 13.79  | 19.05 |
| GAIF01010846.1 | 2.7   | 4.23   | 4.95   | 8.93  | 10.26  | 2.63  |
| GAIF01010847.1 | 1.33  | 0.39   | 0.19   | 2.47  | 7.32   | 2.26  |
| GAIF01010849.1 | 0.27  | 0.12   | 0.12   | 0.69  | 2.14   | 0.18  |
| GAIF01010851.1 | 13.01 | 8.74   | 7.01   | 52.86 | 51.23  | 10.19 |
| GAIF01010852.1 | 0     | 0.35   | 0      | 0     | 0.13   | 0     |
| GAIF01010853.1 | 0.14  | 0      | 0.16   | 0.17  | 0      | 0     |
| GAIF01010855.1 | 1.27  | 0.04   | 0.05   | 0.48  | 0.35   | 0.05  |
| GAIF01010856.1 | 45.04 | 44.08  | 16.98  | 98.89 | 106.55 | 31.57 |
| GAIF01010857.1 | 6.07  | 3.79   | 6.57   | 13.58 | 14.82  | 10.37 |
| GAIF01010858.1 | 0.15  | 0.11   | 0.15   | 0.35  | 0.89   | 0.11  |
| GAIF01010859.1 | 36.57 | 34.54  | 22.6   | 50.28 | 57.42  | 18.79 |
| GAIF01010860.1 | 0     | 0      | 0.04   | 0     | 0      | 0     |
| GAIF01010862.1 | 0.58  | 0.6    | 0.74   | 1.52  | 2.1    | 1.14  |
| GAIF01010863.1 | 13.59 | 3.22   | 5.02   | 21.76 | 25.44  | 29.94 |
| GAIF01010865.1 | 0.54  | 0.59   | 0.8    | 4.11  | 4.26   | 0.1   |
| GAIF01010866.1 | 0.1   | 0.08   | 0      | 0     | 0.09   | 0     |
| GAIF01010867.1 | 10.9  | 24.19  | 18.78  | 7.03  | 3.82   | 2.84  |
| GAIF01010868.1 | 0     | 0.14   | 0.5    | 0     | 0      | 0.03  |
| GAIF01010869.1 | 1.93  | 2.29   | 1.16   | 5.3   | 6.34   | 0.77  |
| GAIF01010870.1 | 0.23  | 0      | 0      | 0.95  | 2.83   | 0.52  |
| GAIF01010871.1 | 2.3   | 1.54   | 1.02   | 3.94  | 1.11   | 0.07  |
| GAIF01010873.1 | 0     | 0      | 0      | 0     | 0.41   | 0     |
| GAIF01010874.1 | 0.27  | 0      | 0      | 0.21  | 1.72   | 0     |
| GAIF01010875.1 | 0     | 1.42   | 2.77   | 0     | 0.17   | 0.26  |
| GAIF01010876.1 | 0.1   | 0      | 0      | 0.12  | 1.26   | 0     |
| GAIF01010877.1 | 0.05  | 0      | 0      | 0     | 1.22   | 0     |
| GAIF01010878.1 | 0.74  | 0.65   | 0.34   | 3.14  | 4.96   | 0.18  |
| GAIF01010879.1 | 0.14  | 0.15   | 0      | 1.86  | 5.99   | 0     |
| GAIF01010881.1 | 0     | 0      | 0      | 0     | 0.04   | 0     |
| GAIF01010882.1 | 0     | 0.2    | 0.15   | 0.38  | 1.24   | 0.1   |
| GAIF01010883.1 | 2.24  | 1.28   | 0.25   | 0.87  | 3.4    | 0.48  |
| GAIF01010884.1 | 4.4   | 4.61   | 0      | 7.02  | 14.11  | 0     |
| GAIF01010885.1 | 3.86  | 3.33   | 1.41   | 1.92  | 3.01   | 0.63  |
| GAIF01010886.1 | 0.88  | 0.32   | 0.11   | 6.58  | 17.75  | 0.65  |
| GAIF01010887.1 | 0     | 1.59   | 0      | 1.6   | 1.26   | 0     |

|                |         |         |         |         |         |         |
|----------------|---------|---------|---------|---------|---------|---------|
| GAIF01010889.1 | 0       | 0       | 0       | 0.05    | 0.07    | 0       |
| GAIF01010891.1 | 5.6     | 10.87   | 2.34    | 35.27   | 50.81   | 0.59    |
| GAIF01010893.1 | 0       | 0       | 0       | 0.04    | 0       | 0.03    |
| GAIF01010895.1 | 0       | 0       | 0       | 0.31    | 0       | 0       |
| GAIF01010896.1 | 0.49    | 0       | 0       | 0.43    | 4.15    | 3.26    |
| GAIF01010897.1 | 0.3     | 0.63    | 0.4     | 1.04    | 0.46    | 0.07    |
| GAIF01010898.1 | 0.41    | 0.03    | 0.45    | 0.37    | 1.51    | 0.19    |
| GAIF01010900.1 | 0.11    | 0.17    | 0.02    | 1.53    | 2.31    | 0.83    |
| GAIF01010901.1 | 145.17  | 68.45   | 69.98   | 204.09  | 102.88  | 156.49  |
| GAIF01010903.1 | 2       | 0.19    | 0.29    | 0.3     | 0       | 0       |
| GAIF01010904.1 | 18.19   | 21.43   | 16.05   | 53.23   | 47.12   | 8.04    |
| GAIF01010905.1 | 2.63    | 1.83    | 2.17    | 3.09    | 0       | 0.67    |
| GAIF01010907.1 | 14.14   | 8.44    | 10.69   | 9.12    | 2.31    | 7.33    |
| GAIF01010908.1 | 0       | 0.07    | 0.03    | 0       | 0.03    | 0       |
| GAIF01010910.1 | 0.33    | 0.31    | 0.16    | 0       | 0       | 0       |
| GAIF01010914.1 | 13.14   | 10.73   | 8.5     | 35.67   | 46.14   | 5.05    |
| GAIF01010915.1 | 0.41    | 0.17    | 0.11    | 0.36    | 0.49    | 0.17    |
| GAIF01010917.1 | 0       | 0       | 0       | 0       | 0.18    | 0       |
| GAIF01010918.1 | 0.05    | 0       | 0       | 0.18    | 0.39    | 0       |
| GAIF01010919.1 | 5.1     | 2.65    | 0.49    | 11.32   | 37.87   | 4.64    |
| GAIF01010920.1 | 1.26    | 0.42    | 0       | 2.44    | 1.97    | 1.26    |
| GAIF01010921.1 | 0       | 0       | 0       | 0.1     | 0       | 0       |
| GAIF01010927.1 | 359.57  | 116.36  | 119.51  | 292.11  | 97.21   | 90.02   |
| GAIF01010929.1 | 3103.01 | 3166.42 | 3283.45 | 1864.82 | 1827.14 | 6427.63 |
| GAIF01010931.1 | 0       | 1.62    | 0       | 0       | 0       | 0.09    |
| GAIF01010933.1 | 13.83   | 16.03   | 14.72   | 17.78   | 10.55   | 6.8     |
| GAIF01010936.1 | 1.44    | 0       | 0.65    | 5.86    | 1.04    | 0.52    |
| GAIF01010937.1 | 4.08    | 2.8     | 1.79    | 14.5    | 10.49   | 1.74    |
| GAIF01010939.1 | 0       | 0.34    | 0       | 0       | 0       | 0       |
| GAIF01010941.1 | 299.43  | 305.33  | 724.17  | 318.41  | 171.13  | 525.67  |
| GAIF01010942.1 | 2.06    | 0.41    | 0       | 6.28    | 9.69    | 15.33   |
| GAIF01010943.1 | 0.18    | 0.57    | 0.19    | 2.99    | 5.84    | 0.45    |
| GAIF01010944.1 | 269.7   | 125.16  | 47.33   | 1195.32 | 1078.57 | 155.57  |
| GAIF01010945.1 | 33.96   | 2       | 1.65    | 68.93   | 112.67  | 202.44  |
| GAIF01010947.1 | 0       | 0       | 0       | 0       | 0.05    | 0       |
| GAIF01010948.1 | 1.95    | 0.49    | 0.66    | 4.04    | 9.29    | 6.34    |
| GAIF01010949.1 | 2.66    | 1.74    | 0.17    | 13.67   | 42.85   | 0.99    |
| GAIF01010950.1 | 20.43   | 42.65   | 71.05   | 98.48   | 92.74   | 126.54  |
| GAIF01010951.1 | 0       | 0.14    | 0       | 0.87    | 2.42    | 0       |
| GAIF01010953.1 | 0       | 0.03    | 0       | 0       | 0.04    | 0       |
| GAIF01010954.1 | 0.19    | 0.04    | 0.17    | 0.27    | 0.19    | 0.04    |
| GAIF01010955.1 | 40.89   | 35.1    | 37.5    | 46.17   | 17.92   | 17.88   |
| GAIF01010956.1 | 0       | 0.46    | 0.09    | 0       | 0       | 0.09    |
| GAIF01010957.1 | 0.15    | 0.27    | 0       | 0.26    | 0       | 0       |

|                |        |       |       |       |        |        |
|----------------|--------|-------|-------|-------|--------|--------|
| GAIF01010960.1 | 0      | 0     | 0     | 0.03  | 0      | 0      |
| GAIF01010962.1 | 0      | 0     | 0     | 0     | 0      | 0.06   |
| GAIF01010966.1 | 0.2    | 0.06  | 0.17  | 0.12  | 1.35   | 0      |
| GAIF01010967.1 | 4.08   | 9.43  | 17.13 | 1.49  | 1.86   | 1.24   |
| GAIF01010969.1 | 21.92  | 23.52 | 16.9  | 53.08 | 35.79  | 4.72   |
| GAIF01010970.1 | 0      | 0.15  | 0     | 0     | 0.32   | 0      |
| GAIF01010971.1 | 0      | 0     | 0     | 0     | 0.17   | 0      |
| GAIF01010973.1 | 0      | 3.1   | 1.38  | 0     | 0      | 1.21   |
| GAIF01010974.1 | 0      | 0.2   | 0.54  | 0     | 0      | 0      |
| GAIF01010975.1 | 1.35   | 1.15  | 0.66  | 60.43 | 0      | 0.83   |
| GAIF01010976.1 | 0.19   | 0.07  | 0.05  | 0.05  | 0.25   | 0      |
| GAIF01010977.1 | 0      | 0     | 0     | 0.09  | 0.26   | 0      |
| GAIF01010978.1 | 9.07   | 13.74 | 6.66  | 65.55 | 94.29  | 1.65   |
| GAIF01010979.1 | 0      | 0     | 0     | 0.19  | 0.1    | 0.26   |
| GAIF01010980.1 | 28.87  | 13.02 | 21.88 | 36.62 | 18.9   | 110.17 |
| GAIF01010981.1 | 0.78   | 0.1   | 0.07  | 1.2   | 1.1    | 0.91   |
| GAIF01010982.1 | 0      | 0     | 0     | 0     | 0      | 0.25   |
| GAIF01010983.1 | 0      | 0.12  | 0     | 0.27  | 1.34   | 0.13   |
| GAIF01010985.1 | 0.63   | 0.14  | 0     | 1.88  | 3.19   | 0.14   |
| GAIF01010986.1 | 115.71 | 54.42 | 42.31 | 155.6 | 79.74  | 11.51  |
| GAIF01010987.1 | 0.1    | 0     | 0     | 0     | 0      | 0      |
| GAIF01010988.1 | 8.22   | 4.27  | 4.2   | 14.96 | 18.2   | 6.59   |
| GAIF01010989.1 | 0.1    | 0.11  | 0.11  | 2.09  | 5.9    | 3.31   |
| GAIF01010992.1 | 0      | 0     | 0     | 0.22  | 0.11   | 0      |
| GAIF01010993.1 | 24.86  | 38.56 | 47.79 | 59.18 | 35.91  | 15.47  |
| GAIF01010994.1 | 0      | 0     | 0     | 1     | 4      | 0.25   |
| GAIF01010999.1 | 6.16   | 7.93  | 2.28  | 9.48  | 13.45  | 0.76   |
| GAIF01011001.1 | 0      | 0.11  | 0.23  | 0     | 0      | 0      |
| GAIF01011002.1 | 0      | 0.19  | 0     | 0.4   | 0      | 0      |
| GAIF01011003.1 | 3.85   | 1.98  | 1.59  | 1.77  | 1.76   | 1      |
| GAIF01011004.1 | 0.05   | 0     | 0     | 0     | 0.06   | 0      |
| GAIF01011005.1 | 33.28  | 42.94 | 43.84 | 95.18 | 66.74  | 14.79  |
| GAIF01011006.1 | 0      | 0.57  | 1.16  | 0.12  | 0      | 0.12   |
| GAIF01011007.1 | 0.19   | 0.15  | 0.05  | 1.47  | 4.75   | 0.47   |
| GAIF01011008.1 | 0      | 0     | 0     | 0.03  | 0      | 0      |
| GAIF01011009.1 | 15.17  | 9.99  | 11.64 | 12.31 | 13.01  | 5.21   |
| GAIF01011010.1 | 0.52   | 0.4   | 0.57  | 0.91  | 0.69   | 0.34   |
| GAIF01011011.1 | 0      | 1.5   | 1.18  | 0     | 0      | 0      |
| GAIF01011012.1 | 0      | 0     | 0     | 0     | 0.13   | 0      |
| GAIF01011013.1 | 1.43   | 1.49  | 0.35  | 12.61 | 9.19   | 0      |
| GAIF01011014.1 | 139.9  | 64.83 | 37.17 | 95.62 | 108.96 | 242.73 |
| GAIF01011015.1 | 42.1   | 56.18 | 42.32 | 30.67 | 24.33  | 25.11  |
| GAIF01011017.1 | 1.62   | 3.43  | 2.01  | 0.84  | 1.38   | 0.56   |
| GAIF01011018.1 | 9.1    | 6.85  | 5.86  | 10.46 | 6      | 1.06   |

|                |        |        |        |        |        |       |
|----------------|--------|--------|--------|--------|--------|-------|
| GAIF01011019.1 | 15.4   | 15.66  | 22.01  | 27.25  | 29.08  | 11.64 |
| GAIF01011021.1 | 0      | 0      | 0      | 0      | 0.5    | 0     |
| GAIF01011022.1 | 0.09   | 0      | 0.21   | 0.6    | 4.71   | 0.16  |
| GAIF01011023.1 | 0      | 0.86   | 0.71   | 0      | 0      | 0.24  |
| GAIF01011024.1 | 0.2    | 0.11   | 0      | 1.37   | 4.39   | 3.15  |
| GAIF01011025.1 | 50.59  | 65.03  | 27.57  | 105.65 | 102.27 | 8.28  |
| GAIF01011026.1 | 15.28  | 22.58  | 37.02  | 18.97  | 22.19  | 6.07  |
| GAIF01011027.1 | 12.64  | 15.52  | 11.82  | 16.89  | 10.97  | 1.96  |
| GAIF01011028.1 | 0      | 0      | 0      | 0      | 0.82   | 0     |
| GAIF01011030.1 | 5.21   | 4.91   | 6.35   | 17.21  | 18.11  | 4.39  |
| GAIF01011032.1 | 0      | 0      | 0      | 0      | 1.08   | 0     |
| GAIF01011035.1 | 0      | 0.13   | 0      | 0      | 0      | 0     |
| GAIF01011037.1 | 0      | 0.12   | 0.12   | 0      | 0.13   | 0     |
| GAIF01011038.1 | 2.26   | 0.94   | 0.19   | 0.7    | 1.04   | 0.1   |
| GAIF01011039.1 | 78.22  | 83.2   | 109.36 | 53.5   | 26.78  | 26.08 |
| GAIF01011040.1 | 7.3    | 8.89   | 0      | 15.46  | 13.35  | 0     |
| GAIF01011043.1 | 0      | 0.71   | 0.48   | 0.19   | 0.07   | 0.06  |
| GAIF01011045.1 | 12.59  | 16.43  | 2.88   | 22.84  | 27.33  | 6.52  |
| GAIF01011047.1 | 0      | 0      | 0      | 0      | 0.17   | 0     |
| GAIF01011049.1 | 0.5    | 0.49   | 0.89   | 4.77   | 2.2    | 0     |
| GAIF01011050.1 | 33.03  | 25.56  | 21.21  | 155.97 | 171.15 | 18.22 |
| GAIF01011051.1 | 0.29   | 0.21   | 0.52   | 0.55   | 1.26   | 0     |
| GAIF01011052.1 | 38.05  | 50.56  | 37.28  | 118.22 | 93.2   | 16.63 |
| GAIF01011053.1 | 1.03   | 0.27   | 0      | 1.91   | 1.13   | 1.31  |
| GAIF01011056.1 | 0.29   | 0.13   | 0.19   | 0      | 0      | 0     |
| GAIF01011060.1 | 0      | 0      | 0      | 0      | 0.18   | 0     |
| GAIF01011063.1 | 0.04   | 0.07   | 0      | 0      | 0      | 0.22  |
| GAIF01011064.1 | 25.02  | 18.53  | 19.4   | 46.85  | 54.33  | 76.47 |
| GAIF01011065.1 | 0      | 0.08   | 0      | 0.13   | 0.84   | 0     |
| GAIF01011066.1 | 0      | 0      | 0      | 0.3    | 0.76   | 0.29  |
| GAIF01011067.1 | 0      | 0      | 0      | 0.04   | 0.27   | 0     |
| GAIF01011069.1 | 1.14   | 0.2    | 0.07   | 4.81   | 20.29  | 1.26  |
| GAIF01011070.1 | 0.6    | 0.92   | 0.46   | 3.91   | 5.21   | 0     |
| GAIF01011071.1 | 0      | 0      | 0.06   | 1.53   | 2.59   | 0     |
| GAIF01011073.1 | 3.33   | 1.92   | 1.51   | 3.98   | 2.47   | 3.35  |
| GAIF01011074.1 | 0.32   | 0      | 0.14   | 0.52   | 1.44   | 1.47  |
| GAIF01011075.1 | 91.31  | 92.94  | 60.46  | 136.65 | 112.1  | 61.43 |
| GAIF01011076.1 | 320.16 | 235.39 | 169.33 | 325.57 | 322.31 | 54.6  |
| GAIF01011078.1 | 12.25  | 14.15  | 7.45   | 16.25  | 18.42  | 47.49 |
| GAIF01011079.1 | 0.06   | 0      | 0      | 0      | 0      | 0     |
| GAIF01011080.1 | 0.13   | 0.05   | 0      | 0.05   | 0.46   | 0     |
| GAIF01011083.1 | 0      | 0.26   | 0      | 0.28   | 1.73   | 0     |
| GAIF01011084.1 | 0.12   | 0.04   | 0.14   | 0      | 0.15   | 0     |
| GAIF01011085.1 | 0      | 0      | 0      | 13.08  | 16.04  | 0     |

|                |        |        |        |        |        |       |
|----------------|--------|--------|--------|--------|--------|-------|
| GAIF01011086.1 | 12.99  | 12.2   | 14.63  | 25.45  | 21.9   | 8.07  |
| GAIF01011087.1 | 84.48  | 110.39 | 59.37  | 95.83  | 82.57  | 9.27  |
| GAIF01011088.1 | 0.03   | 0      | 0      | 0      | 0      | 0     |
| GAIF01011089.1 | 0      | 0      | 0.12   | 0      | 0      | 0     |
| GAIF01011090.1 | 0.59   | 0.4    | 0.53   | 0.81   | 0.66   | 0.45  |
| GAIF01011091.1 | 0      | 0      | 0      | 0.28   | 0.14   | 0     |
| GAIF01011093.1 | 0      | 0      | 0.07   | 0      | 0.15   | 0     |
| GAIF01011095.1 | 0      | 0      | 0.05   | 0      | 0      | 0.08  |
| GAIF01011098.1 | 3.8    | 4.11   | 3.48   | 24.99  | 31.5   | 3.06  |
| GAIF01011099.1 | 0.01   | 0      | 0      | 0      | 0      | 0     |
| GAIF01011100.1 | 0.09   | 0.09   | 0      | 1.1    | 3.1    | 0.09  |
| GAIF01011101.1 | 0.04   | 0      | 0.04   | 0      | 0      | 0     |
| GAIF01011103.1 | 1.45   | 1.04   | 1.35   | 0.54   | 0.96   | 0.17  |
| GAIF01011104.1 | 28.61  | 27.37  | 28.49  | 58.42  | 45.5   | 18.26 |
| GAIF01011108.1 | 55.58  | 40.19  | 57.83  | 98.97  | 46.31  | 85.88 |
| GAIF01011109.1 | 45.44  | 33.46  | 5.33   | 3.26   | 1.58   | 2.17  |
| GAIF01011111.1 | 0      | 0      | 0      | 0.46   | 0.67   | 0     |
| GAIF01011115.1 | 1.22   | 0      | 0      | 1.81   | 8.51   | 0     |
| GAIF01011117.1 | 0      | 0.37   | 0      | 0      | 0.07   | 0.06  |
| GAIF01011119.1 | 0.38   | 0.15   | 0.05   | 0.94   | 6.96   | 1.2   |
| GAIF01011120.1 | 1.17   | 0.12   | 0      | 4.46   | 10.54  | 1.87  |
| GAIF01011121.1 | 21.58  | 31.74  | 17.8   | 65.52  | 61.11  | 8.75  |
| GAIF01011122.1 | 0.28   | 0.15   | 0      | 1.96   | 10.62  | 0     |
| GAIF01011123.1 | 0      | 0      | 0      | 0.22   | 0.99   | 0     |
| GAIF01011125.1 | 1.2    | 0.52   | 2.1    | 0.17   | 0      | 0.16  |
| GAIF01011127.1 | 0      | 0      | 0      | 0      | 0.05   | 0     |
| GAIF01011128.1 | 0      | 0      | 0      | 0.4    | 0      | 0     |
| GAIF01011130.1 | 0.4    | 0.22   | 0.27   | 0.46   | 1.85   | 0.41  |
| GAIF01011131.1 | 16.43  | 13.38  | 14.63  | 19.73  | 10.36  | 7.09  |
| GAIF01011133.1 | 0      | 0      | 0.08   | 0.04   | 0      | 0     |
| GAIF01011135.1 | 11.71  | 5.9    | 6.71   | 5.77   | 2.82   | 1.64  |
| GAIF01011136.1 | 0.02   | 0      | 0      | 0      | 0.19   | 0.06  |
| GAIF01011139.1 | 6.4    | 1.97   | 8.94   | 5      | 1.35   | 1.81  |
| GAIF01011141.1 | 150.84 | 184.2  | 155.44 | 245.07 | 230.27 | 85.38 |
| GAIF01011143.1 | 0.15   | 0      | 0.08   | 15.73  | 0.09   | 0.33  |
| GAIF01011145.1 | 0.07   | 0      | 0      | 0      | 0.71   | 0     |
| GAIF01011146.1 | 6.24   | 7.02   | 3.88   | 26.14  | 17.75  | 1.51  |
| GAIF01011147.1 | 0.26   | 0      | 0      | 0.15   | 0.16   | 0.14  |
| GAIF01011148.1 | 2.36   | 0.1    | 0.1    | 1.47   | 4.58   | 2.4   |
| GAIF01011149.1 | 55.73  | 6.65   | 0.88   | 40.58  | 63.46  | 6.96  |
| GAIF01011151.1 | 8.36   | 19.67  | 14.22  | 8.04   | 4.74   | 1.12  |
| GAIF01011152.1 | 0      | 0      | 0      | 0.08   | 0      | 0     |
| GAIF01011153.1 | 2.93   | 1.37   | 3.59   | 3.46   | 1.3    | 2.24  |
| GAIF01011154.1 | 0      | 0.15   | 0.03   | 0      | 0.06   | 0     |

|                |         |         |         |        |         |        |
|----------------|---------|---------|---------|--------|---------|--------|
| GAIF01011155.1 | 0       | 0       | 0.04    | 0      | 0.55    | 0.04   |
| GAIF01011156.1 | 0       | 0.15    | 0       | 0      | 0       | 0      |
| GAIF01011157.1 | 0       | 0       | 0       | 0      | 0       | 0.03   |
| GAIF01011159.1 | 0.05    | 0       | 0       | 0.06   | 0       | 0      |
| GAIF01011160.1 | 3.71    | 6.13    | 6.04    | 9.12   | 4.85    | 2.68   |
| GAIF01011161.1 | 6.14    | 13.25   | 33.22   | 29.91  | 31.67   | 46.84  |
| GAIF01011163.1 | 3.21    | 2.58    | 1.73    | 9.16   | 6.9     | 1.62   |
| GAIF01011164.1 | 0       | 0.06    | 0       | 0.18   | 2.2     | 0      |
| GAIF01011166.1 | 1.33    | 0.13    | 0       | 3.89   | 9.98    | 0      |
| GAIF01011167.1 | 0.09    | 0.1     | 0       | 0.13   | 0.61    | 0      |
| GAIF01011169.1 | 0       | 0.33    | 0       | 0.38   | 0       | 0.28   |
| GAIF01011171.1 | 0       | 0       | 0       | 0.11   | 0       | 0      |
| GAIF01011173.1 | 8.47    | 15.87   | 7.4     | 1.35   | 1.83    | 3.14   |
| GAIF01011174.1 | 5.73    | 3.75    | 7.96    | 16.48  | 7.99    | 9.22   |
| GAIF01011175.1 | 12.33   | 5.32    | 1.5     | 10.38  | 15.12   | 17.64  |
| GAIF01011176.1 | 0       | 0       | 0.06    | 0      | 0       | 0      |
| GAIF01011177.1 | 0       | 0       | 0       | 1.13   | 4.47    | 0      |
| GAIF01011178.1 | 0.73    | 0.63    | 0.48    | 0.17   | 1.57    | 0      |
| GAIF01011181.1 | 0       | 0       | 0       | 0.32   | 0.17    | 0      |
| GAIF01011183.1 | 5.32    | 7.89    | 5.19    | 2.43   | 2.38    | 0.45   |
| GAIF01011184.1 | 4730.06 | 4758.69 | 4551.96 | 2369.3 | 1568.41 | 3983.3 |
| GAIF01011185.1 | 0.14    | 0       | 0.15    | 0.98   | 1.86    | 0      |
| GAIF01011187.1 | 0       | 0       | 0       | 0      | 0.06    | 0      |
| GAIF01011190.1 | 0.57    | 0.16    | 0.12    | 7.08   | 34.71   | 0.5    |
| GAIF01011191.1 | 0.12    | 0.27    | 0.24    | 0.5    | 0.31    | 0      |
| GAIF01011192.1 | 0.16    | 0.29    | 0.52    | 0      | 0       | 0      |
| GAIF01011193.1 | 3.67    | 4.27    | 4.69    | 1.58   | 0.62    | 1.6    |
| GAIF01011194.1 | 5.32    | 6.87    | 8.76    | 33.38  | 13.59   | 8.43   |
| GAIF01011195.1 | 27.1    | 29.61   | 39.26   | 61.76  | 26.88   | 17.39  |
| GAIF01011196.1 | 0       | 0       | 0       | 16.36  | 26.8    | 1.05   |
| GAIF01011197.1 | 3.74    | 9.45    | 5.92    | 15.84  | 15.75   | 2.43   |
| GAIF01011198.1 | 1775.69 | 1272.96 | 890.67  | 164.07 | 188.4   | 451.05 |
| GAIF01011199.1 | 3.46    | 5.6     | 8.45    | 2.96   | 9.91    | 2.91   |
| GAIF01011202.1 | 0.11    | 0       | 0       | 0.78   | 2.7     | 0      |
| GAIF01011203.1 | 0.31    | 0.08    | 0.03    | 1.39   | 4.73    | 0.52   |
| GAIF01011204.1 | 0       | 0       | 0       | 0      | 1.79    | 0.15   |
| GAIF01011205.1 | 3.34    | 0.11    | 0       | 0.36   | 0       | 0      |
| GAIF01011206.1 | 97.25   | 72.46   | 24.62   | 102.68 | 119.56  | 28.53  |
| GAIF01011208.1 | 0.27    | 0.96    | 0.6     | 4.2    | 1.23    | 0.23   |
| GAIF01011210.1 | 0       | 0       | 0       | 0.11   | 1.57    | 0.1    |
| GAIF01011212.1 | 15.25   | 15.99   | 23.92   | 0.63   | 0.52    | 0.48   |
| GAIF01011213.1 | 0.49    | 0.27    | 0       | 1.14   | 6.62    | 0      |
| GAIF01011214.1 | 0.06    | 0.06    | 0       | 0.45   | 1.54    | 1.96   |
| GAIF01011215.1 | 1.35    | 1.36    | 0.91    | 10.26  | 42.38   | 0.92   |

|                |        |        |        |        |        |         |
|----------------|--------|--------|--------|--------|--------|---------|
| GAIF01011216.1 | 35.98  | 38.65  | 22.9   | 3.03   | 17.93  | 33.56   |
| GAIF01011218.1 | 0      | 1.11   | 0.57   | 0      | 0      | 0       |
| GAIF01011220.1 | 0.02   | 0.32   | 0      | 0.09   | 0.07   | 0       |
| GAIF01011221.1 | 0.08   | 0.09   | 0      | 1.04   | 2.55   | 0.36    |
| GAIF01011222.1 | 0.9    | 0.14   | 0.14   | 3.03   | 1.75   | 0.61    |
| GAIF01011224.1 | 0      | 0      | 0      | 0      | 0.2    | 0       |
| GAIF01011225.1 | 452.29 | 717.42 | 633.6  | 47.83  | 33.58  | 74.14   |
| GAIF01011226.1 | 4.13   | 1.88   | 0.29   | 7.58   | 23.88  | 4.55    |
| GAIF01011228.1 | 0      | 0.07   | 0      | 0      | 0      | 0.22    |
| GAIF01011231.1 | 0.59   | 0.4    | 0.17   | 5.27   | 23.83  | 0.51    |
| GAIF01011232.1 | 0.14   | 0      | 0      | 0      | 0.5    | 0       |
| GAIF01011233.1 | 9.56   | 0.89   | 0.41   | 36.65  | 156.94 | 99.39   |
| GAIF01011237.1 | 0.2    | 0      | 0      | 0.11   | 1.14   | 0.04    |
| GAIF01011238.1 | 2.98   | 2.63   | 0.62   | 25.27  | 42.45  | 0.33    |
| GAIF01011239.1 | 0.14   | 0      | 0.08   | 0.13   | 0.42   | 0.04    |
| GAIF01011240.1 | 0      | 0      | 0      | 0.22   | 0      | 0       |
| GAIF01011241.1 | 47.7   | 34.44  | 43.6   | 74.42  | 95.54  | 27.14   |
| GAIF01011242.1 | 7.25   | 7.28   | 3.01   | 25.8   | 46.08  | 4.88    |
| GAIF01011244.1 | 9.23   | 19.35  | 13.68  | 46.93  | 30.21  | 3.46    |
| GAIF01011245.1 | 6.87   | 3.78   | 2.26   | 32.22  | 24.62  | 3.97    |
| GAIF01011248.1 | 0      | 0      | 0      | 0      | 0.21   | 0       |
| GAIF01011249.1 | 0.22   | 0      | 0      | 0      | 0      | 0       |
| GAIF01011250.1 | 0      | 0      | 0      | 0      | 0.04   | 0       |
| GAIF01011252.1 | 0      | 0      | 0      | 0      | 2.16   | 0       |
| GAIF01011254.1 | 0      | 0      | 0      | 0      | 0.19   | 0       |
| GAIF01011255.1 | 0      | 0      | 0      | 0.96   | 6.41   | 0       |
| GAIF01011257.1 | 372.42 | 20.87  | 26.96  | 360.13 | 901.61 | 2492.35 |
| GAIF01011258.1 | 0      | 0.33   | 0.36   | 0.17   | 0.44   | 0       |
| GAIF01011259.1 | 15.87  | 11.41  | 11.15  | 28.36  | 38.18  | 17.12   |
| GAIF01011260.1 | 0      | 0      | 0.06   | 0      | 0      | 0.07    |
| GAIF01011262.1 | 0      | 0      | 0.04   | 0.35   | 0      | 0.21    |
| GAIF01011263.1 | 2.77   | 2.13   | 2.25   | 10.83  | 10.91  | 0.53    |
| GAIF01011264.1 | 0.43   | 0.1    | 0.1    | 2.57   | 14.67  | 0.45    |
| GAIF01011265.1 | 2.84   | 3.78   | 2.8    | 15.22  | 12.78  | 4.07    |
| GAIF01011266.1 | 0.62   | 0      | 0      | 1.2    | 6.49   | 0.12    |
| GAIF01011267.1 | 24.73  | 37.31  | 28.8   | 36.21  | 32.85  | 10.91   |
| GAIF01011268.1 | 108.43 | 151.06 | 194.27 | 155.37 | 114.27 | 137.13  |
| GAIF01011269.1 | 0      | 0      | 0      | 0      | 0.08   | 0       |
| GAIF01011271.1 | 9.11   | 6.32   | 2.01   | 3.08   | 3.36   | 1.02    |
| GAIF01011273.1 | 10.79  | 12.62  | 14.43  | 3.68   | 1.74   | 1.1     |
| GAIF01011274.1 | 0      | 0      | 0      | 0.13   | 2.2    | 0       |
| GAIF01011275.1 | 0      | 0.06   | 0      | 0      | 0      | 0       |
| GAIF01011276.1 | 0      | 0      | 0      | 0      | 0.08   | 0       |
| GAIF01011280.1 | 3.76   | 1.1    | 0      | 11.43  | 32.85  | 4.03    |



|                |       |       |        |        |        |       |
|----------------|-------|-------|--------|--------|--------|-------|
| GAIF01011281.1 | 20.48 | 16.99 | 19.52  | 29.39  | 17.71  | 12.87 |
| GAIF01011282.1 | 1.34  | 0     | 0      | 5.31   | 6.98   | 0.3   |
| GAIF01011283.1 | 88.44 | 155.6 | 137.52 | 268.77 | 284.09 | 40.08 |
| GAIF01011284.1 | 0     | 0.11  | 0      | 0      | 0.12   | 0     |
| GAIF01011285.1 | 0.3   | 0.19  | 0.24   | 2.22   | 4.2    | 0.49  |
| GAIF01011286.1 | 0     | 0     | 0      | 0.05   | 0.1    | 0     |
| GAIF01011288.1 | 39.32 | 30.63 | 29.01  | 94.74  | 44.47  | 40.6  |
| GAIF01011289.1 | 0.27  | 0.12  | 0      | 1.95   | 8.29   | 0.17  |
| GAIF01011290.1 | 22.57 | 15.59 | 27.89  | 29.32  | 16.05  | 21.27 |
| GAIF01011291.1 | 0     | 0     | 0      | 0.3    | 1.96   | 0     |
| GAIF01011293.1 | 22.42 | 30.66 | 26.09  | 63.23  | 67.86  | 18.25 |
| GAIF01011297.1 | 58.78 | 57.34 | 0      | 59.78  | 5.93   | 0     |
| GAIF01011299.1 | 2.27  | 0.25  | 0      | 10.43  | 23.86  | 0     |
| GAIF01011300.1 | 0.24  | 0     | 0.06   | 2.27   | 10.6   | 0.52  |
| GAIF01011302.1 | 4.63  | 7.92  | 8.62   | 13.52  | 9.44   | 3.01  |
| GAIF01011303.1 | 0.38  | 0.21  | 0.14   | 2      | 7.28   | 0     |
| GAIF01011304.1 | 0.7   | 0.38  | 0.77   | 0.81   | 0.42   | 1.54  |
| GAIF01011306.1 | 26.71 | 33.45 | 10.46  | 98.12  | 61.27  | 4.8   |
| GAIF01011307.1 | 0.17  | 0     | 0      | 0      | 0      | 0     |
| GAIF01011308.1 | 0.03  | 0     | 0      | 0      | 0      | 0     |
| GAIF01011310.1 | 0     | 0     | 0      | 0.14   | 0.59   | 0     |
| GAIF01011311.1 | 1.56  | 0.26  | 0.07   | 2.44   | 8.37   | 2.89  |
| GAIF01011316.1 | 0     | 0     | 0.96   | 0.37   | 0      | 0     |
| GAIF01011317.1 | 0.17  | 0     | 0.04   | 0      | 0.04   | 0     |
| GAIF01011319.1 | 0     | 0     | 0      | 0      | 0.13   | 0     |
| GAIF01011320.1 | 0.03  | 0.07  | 0.07   | 0.66   | 3.18   | 0     |
| GAIF01011322.1 | 7.23  | 5.19  | 0.38   | 4.94   | 10.83  | 2.86  |
| GAIF01011325.1 | 1.77  | 4.92  | 7.92   | 3.19   | 4.14   | 13.41 |
| GAIF01011326.1 | 0.15  | 0.34  | 0      | 0.67   | 0.81   | 0     |
| GAIF01011327.1 | 0     | 0.1   | 0      | 0.1    | 2.48   | 0     |
| GAIF01011330.1 | 38.74 | 55.04 | 44.67  | 54.25  | 29.97  | 14.2  |
| GAIF01011331.1 | 11.82 | 7.16  | 1.73   | 11.95  | 32.59  | 6.99  |
| GAIF01011332.1 | 0     | 0     | 0.75   | 0      | 0      | 0     |
| GAIF01011334.1 | 27.37 | 35.63 | 77.7   | 36.96  | 25.28  | 37.02 |
| GAIF01011335.1 | 0     | 0     | 0      | 0      | 0.12   | 0     |
| GAIF01011340.1 | 8.71  | 8.68  | 11.42  | 6.58   | 0.45   | 6.33  |
| GAIF01011342.1 | 11.25 | 0.77  | 0      | 13.01  | 20.51  | 36.76 |
| GAIF01011343.1 | 0     | 0     | 0      | 0      | 0.12   | 0     |
| GAIF01011344.1 | 0     | 0     | 0.09   | 0.1    | 0.61   | 0.19  |
| GAIF01011345.1 | 52.69 | 22.96 | 25.29  | 29.79  | 26.24  | 90.1  |
| GAIF01011346.1 | 0.14  | 0.09  | 0.07   | 0      | 1.02   | 0.18  |
| GAIF01011350.1 | 0.38  | 0.27  | 0      | 2.2    | 5.92   | 0.14  |
| GAIF01011351.1 | 0.07  | 0     | 0.32   | 0.12   | 0      | 0.08  |
| GAIF01011352.1 | 35.74 | 43.75 | 32.27  | 114.05 | 142.39 | 27.39 |

|                |        |         |        |        |        |        |
|----------------|--------|---------|--------|--------|--------|--------|
| GAIF01011353.1 | 15.24  | 10.78   | 3.43   | 4.06   | 7.42   | 2.08   |
| GAIF01011354.1 | 5.69   | 1.25    | 0.08   | 0.3    | 2.24   | 0.04   |
| GAIF01011355.1 | 0.05   | 0       | 0      | 0.06   | 0.03   | 0      |
| GAIF01011357.1 | 0      | 0       | 0.04   | 0.04   | 0      | 0      |
| GAIF01011358.1 | 7.42   | 13.44   | 17.22  | 6.93   | 4.4    | 3.11   |
| GAIF01011359.1 | 1.27   | 1.7     | 0.86   | 0.91   | 0.59   | 0      |
| GAIF01011360.1 | 0.22   | 0.14    | 0      | 0.85   | 0.63   | 0      |
| GAIF01011361.1 | 0      | 0.11    | 0      | 0.13   | 2.07   | 0      |
| GAIF01011362.1 | 17     | 4.02    | 0.67   | 39.13  | 135.11 | 15.02  |
| GAIF01011365.1 | 87.95  | 93.25   | 214.33 | 49.71  | 38.3   | 172.96 |
| GAIF01011366.1 | 0.79   | 0.93    | 1.23   | 1.76   | 1.66   | 5.07   |
| GAIF01011367.1 | 0.24   | 0.06    | 0      | 0.9    | 2.79   | 0.07   |
| GAIF01011368.1 | 1.19   | 0       | 0      | 2.98   | 15.55  | 0.3    |
| GAIF01011369.1 | 0      | 0       | 0      | 0.47   | 1.15   | 0      |
| GAIF01011370.1 | 6.37   | 4.77    | 7.5    | 14.03  | 8.77   | 18.1   |
| GAIF01011371.1 | 0      | 0       | 1.58   | 0      | 0      | 4.63   |
| GAIF01011372.1 | 0.19   | 0.07    | 0.07   | 5.6    | 22.51  | 0.07   |
| GAIF01011373.1 | 0.69   | 0.22    | 0.36   | 1.15   | 0.15   | 0      |
| GAIF01011374.1 | 23.49  | 19.15   | 12.69  | 55.92  | 51.1   | 0.02   |
| GAIF01011375.1 | 0      | 0       | 0      | 0      | 0.07   | 0      |
| GAIF01011376.1 | 24.83  | 27.86   | 26.94  | 7.67   | 4.63   | 2.8    |
| GAIF01011378.1 | 0.23   | 0       | 0      | 1.23   | 3.39   | 0.26   |
| GAIF01011379.1 | 0.34   | 0.18    | 0      | 0.99   | 2.04   | 0      |
| GAIF01011380.1 | 0.62   | 0       | 0      | 1.56   | 0      | 0      |
| GAIF01011382.1 | 7.31   | 5.99    | 13.32  | 23.36  | 17.41  | 7.14   |
| GAIF01011383.1 | 0      | 0       | 0      | 0.4    | 0      | 0      |
| GAIF01011384.1 | 690.3  | 1081.48 | 699.48 | 205.45 | 612.72 | 81.85  |
| GAIF01011385.1 | 0.06   | 0.06    | 0      | 0      | 0      | 0      |
| GAIF01011386.1 | 0      | 0       | 0      | 0      | 0.3    | 0      |
| GAIF01011387.1 | 20.68  | 11.04   | 6.2    | 82.45  | 89     | 3.39   |
| GAIF01011388.1 | 0      | 0       | 0      | 0      | 0.16   | 0      |
| GAIF01011389.1 | 0      | 0       | 0      | 0      | 0      | 0.14   |
| GAIF01011391.1 | 0.1    | 0.21    | 0      | 0.66   | 3.22   | 0.11   |
| GAIF01011392.1 | 312.06 | 961.88  | 1721.8 | 320.97 | 362.69 | 346.16 |
| GAIF01011393.1 | 23.68  | 60.45   | 43.37  | 78.07  | 56.95  | 8.86   |
| GAIF01011395.1 | 47.57  | 72.2    | 61.73  | 122.06 | 71.59  | 29.85  |
| GAIF01011396.1 | 537.74 | 396.57  | 781.99 | 564.49 | 21.08  | 228.71 |
| GAIF01011397.1 | 0      | 0       | 0      | 0      | 0.17   | 0      |
| GAIF01011398.1 | 0.67   | 0.22    | 0      | 0.1    | 0.2    | 0      |
| GAIF01011400.1 | 0.08   | 0.09    | 0.19   | 0      | 0      | 0      |
| GAIF01011401.1 | 0      | 0       | 0      | 0      | 0.06   | 0      |
| GAIF01011402.1 | 18.95  | 12.95   | 6.24   | 50.11  | 35.16  | 3.88   |
| GAIF01011403.1 | 11.53  | 17.5    | 6.27   | 7.82   | 3.29   | 0.38   |
| GAIF01011404.1 | 0      | 0       | 0      | 0      | 0      | 0.06   |

|                |        |        |        |        |        |        |
|----------------|--------|--------|--------|--------|--------|--------|
| GAIF01011409.1 | 0.3    | 0.11   | 0.05   | 1.27   | 5.39   | 0      |
| GAIF01011410.1 | 0      | 0      | 0      | 0      | 0.1    | 0      |
| GAIF01011412.1 | 8.16   | 8.04   | 3.54   | 9.69   | 19.16  | 4.18   |
| GAIF01011413.1 | 7.89   | 12.14  | 7.9    | 3.72   | 5.97   | 0      |
| GAIF01011414.1 | 0      | 0      | 0.03   | 0      | 0      | 0      |
| GAIF01011415.1 | 5.85   | 1.73   | 0.25   | 19.22  | 27.68  | 1.26   |
| GAIF01011416.1 | 0.12   | 0      | 0.1    | 0.02   | 0.09   | 0.03   |
| GAIF01011418.1 | 0.03   | 0      | 0.28   | 0.62   | 0      | 0      |
| GAIF01011419.1 | 0.75   | 0.15   | 0.06   | 1.31   | 0.14   | 0.39   |
| GAIF01011420.1 | 0.05   | 0      | 0      | 0.16   | 0.76   | 0      |
| GAIF01011421.1 | 2.86   | 7.97   | 3.43   | 8.93   | 8.76   | 0.4    |
| GAIF01011422.1 | 0.04   | 0      | 0      | 0      | 0      | 0      |
| GAIF01011423.1 | 64.67  | 77.01  | 155.13 | 26.74  | 22.47  | 80.18  |
| GAIF01011424.1 | 0.64   | 0.69   | 0.7    | 1.36   | 0.68   | 0.33   |
| GAIF01011425.1 | 0.22   | 0      | 0      | 0.13   | 0.26   | 0      |
| GAIF01011426.1 | 0.72   | 0.26   | 0      | 2      | 22.24  | 43.44  |
| GAIF01011427.1 | 1.33   | 0.8    | 0.43   | 0.85   | 0.85   | 0.09   |
| GAIF01011428.1 | 0      | 0      | 0      | 0      | 0.29   | 0      |
| GAIF01011429.1 | 37.03  | 14.11  | 12.39  | 32.38  | 20.03  | 2.96   |
| GAIF01011430.1 | 0.22   | 0.12   | 0      | 1.95   | 6.07   | 0.37   |
| GAIF01011431.1 | 0      | 0      | 0      | 0.41   | 1      | 0      |
| GAIF01011432.1 | 1.34   | 1.42   | 0.26   | 3.36   | 2.56   | 0.81   |
| GAIF01011433.1 | 0      | 0      | 0      | 0      | 0.08   | 0      |
| GAIF01011434.1 | 47.47  | 58.72  | 42.59  | 6.55   | 6.09   | 4.67   |
| GAIF01011435.1 | 16.88  | 11.73  | 6.02   | 46.62  | 56     | 3.36   |
| GAIF01011436.1 | 0      | 0      | 0      | 0      | 0.37   | 0.82   |
| GAIF01011439.1 | 0.3    | 0.16   | 0.16   | 0.18   | 0      | 0      |
| GAIF01011440.1 | 0.26   | 0.07   | 0      | 1.44   | 5.73   | 0.07   |
| GAIF01011442.1 | 0      | 0.4    | 0.2    | 0      | 0      | 0      |
| GAIF01011443.1 | 0.3    | 0      | 0      | 0.35   | 0      | 0.06   |
| GAIF01011444.1 | 0.17   | 0      | 0      | 0.15   | 0.48   | 0.13   |
| GAIF01011445.1 | 1      | 1.12   | 0.64   | 0.34   | 0      | 0      |
| GAIF01011446.1 | 1.85   | 0.88   | 0.76   | 6.03   | 2.64   | 0.25   |
| GAIF01011447.1 | 3.95   | 2.37   | 3.09   | 26.49  | 61.98  | 2.49   |
| GAIF01011448.1 | 0      | 0      | 0      | 0      | 0      | 0.17   |
| GAIF01011449.1 | 1.18   | 1.2    | 0.26   | 3.58   | 4.33   | 0      |
| GAIF01011452.1 | 1.18   | 0.86   | 1.84   | 1.62   | 0.91   | 0      |
| GAIF01011453.1 | 0.25   | 0      | 0.21   | 0      | 0      | 0      |
| GAIF01011454.1 | 0.09   | 0      | 0      | 0.13   | 0.14   | 0      |
| GAIF01011455.1 | 42.11  | 42.91  | 20.63  | 42.46  | 50.64  | 10.23  |
| GAIF01011456.1 | 0      | 0      | 0      | 0      | 0.01   | 0      |
| GAIF01011457.1 | 0.3    | 0.08   | 0      | 2.24   | 6.35   | 0      |
| GAIF01011458.1 | 819.94 | 708.32 | 926.9  | 435.05 | 281.47 | 283.63 |
| GAIF01011461.1 | 0.31   | 0      | 0      | 0.48   | 5.87   | 0      |

|                |         |         |         |         |        |         |
|----------------|---------|---------|---------|---------|--------|---------|
| GAIF01011465.1 | 0.26    | 0.33    | 0.39    | 0.24    | 0.22   | 0.39    |
| GAIF01011466.1 | 0.71    | 1.11    | 0.48    | 2.21    | 0.94   | 0.45    |
| GAIF01011467.1 | 0.02    | 0       | 0       | 0       | 0.01   | 0       |
| GAIF01011468.1 | 2.06    | 1.72    | 0       | 11.02   | 14.65  | 0.17    |
| GAIF01011469.1 | 5.74    | 2.89    | 2.04    | 10.66   | 14.82  | 7.75    |
| GAIF01011470.1 | 2318.88 | 1348.92 | 1634.63 | 1508.13 | 847.12 | 1964.71 |
| GAIF01011474.1 | 0       | 0.06    | 0.06    | 0.06    | 0.8    | 0.04    |
| GAIF01011477.1 | 0       | 2.39    | 0       | 1.15    | 3.35   | 4.79    |
| GAIF01011478.1 | 105.09  | 62.13   | 44.33   | 121.35  | 157.87 | 220.18  |
| GAIF01011480.1 | 0.05    | 0       | 0.03    | 0       | 0.03   | 0       |
| GAIF01011481.1 | 1.83    | 1.42    | 0       | 3.89    | 7.66   | 0       |
| GAIF01011482.1 | 2.8     | 0.8     | 1.14    | 6.72    | 9.02   | 1.01    |
| GAIF01011483.1 | 7.68    | 9.08    | 22.19   | 14.81   | 10.05  | 7.59    |
| GAIF01011484.1 | 0.06    | 0       | 0       | 0       | 0.81   | 0       |
| GAIF01011485.1 | 4.46    | 1.62    | 0       | 0       | 0      | 0       |
| GAIF01011486.1 | 6.98    | 8.47    | 6.16    | 19.88   | 19.07  | 2.24    |
| GAIF01011488.1 | 31.73   | 18.43   | 17.45   | 6.8     | 9.19   | 7.5     |
| GAIF01011491.1 | 136.22  | 184.15  | 405.38  | 94.97   | 71.55  | 275.49  |
| GAIF01011494.1 | 0.11    | 0.12    | 0.12    | 0.25    | 0.39   | 0       |
| GAIF01011496.1 | 0       | 0       | 0       | 0       | 0.2    | 0       |
| GAIF01011497.1 | 0       | 0       | 0       | 0       | 0.31   | 0       |
| GAIF01011498.1 | 9.96    | 34.17   | 8.35    | 32.87   | 3.23   | 7.91    |
| GAIF01011499.1 | 199.94  | 191.34  | 174.43  | 108     | 57.45  | 27.77   |
| GAIF01011500.1 | 13.57   | 15.95   | 15.34   | 10.63   | 16.32  | 4.12    |
| GAIF01011501.1 | 0.32    | 0       | 0.18    | 0.38    | 4.86   | 0.53    |
| GAIF01011502.1 | 70.95   | 89.1    | 37.58   | 89      | 44.39  | 60.38   |
| GAIF01011503.1 | 4       | 1.4     | 0       | 16.75   | 46.12  | 1.44    |
| GAIF01011504.1 | 0.34    | 0.13    | 0       | 0.21    | 0.36   | 0       |
| GAIF01011506.1 | 0.17    | 0.37    | 0       | 0.69    | 1.23   | 0.09    |
| GAIF01011507.1 | 0       | 0       | 0       | 0       | 0.09   | 0.06    |
| GAIF01011510.1 | 18.27   | 13.05   | 7.55    | 50.67   | 55.19  | 7.81    |
| GAIF01011511.1 | 0.9     | 0       | 9.62    | 8.93    | 8.73   | 7.53    |
| GAIF01011512.1 | 4.96    | 9.18    | 4.23    | 15.39   | 15.6   | 0.6     |
| GAIF01011514.1 | 0       | 0       | 0       | 0       | 0.04   | 0       |
| GAIF01011516.1 | 0.83    | 0.18    | 0       | 1.92    | 7.93   | 1.25    |
| GAIF01011517.1 | 0       | 1.05    | 1.06    | 0       | 0      | 0       |
| GAIF01011518.1 | 342.18  | 278.17  | 386.1   | 95.43   | 44.5   | 62.01   |
| GAIF01011520.1 | 0.05    | 0       | 0.1     | 0       | 0      | 0       |
| GAIF01011521.1 | 0       | 0.26    | 0.37    | 0.72    | 1.94   | 0       |
| GAIF01011522.1 | 0.63    | 0.86    | 0.69    | 0.18    | 0.57   | 0.7     |
| GAIF01011524.1 | 4.77    | 2.66    | 5.36    | 11.41   | 10.6   | 12.6    |
| GAIF01011525.1 | 0       | 0.11    | 0.15    | 0       | 0      | 0.07    |
| GAIF01011526.1 | 4.12    | 5.85    | 0.88    | 14.6    | 22.97  | 1.51    |
| GAIF01011528.1 | 0.01    | 0       | 0       | 0.06    | 0      | 0.38    |

|                |         |        |         |         |         |         |
|----------------|---------|--------|---------|---------|---------|---------|
| GAIF01011529.1 | 2.59    | 0.65   | 0.47    | 6.71    | 24.27   | 2.91    |
| GAIF01011530.1 | 28.41   | 34.18  | 17.38   | 19.32   | 15.26   | 2.95    |
| GAIF01011532.1 | 2736.16 | 812.97 | 1151.99 | 1694.19 | 2459.13 | 9045.91 |
| GAIF01011534.1 | 18.52   | 20.68  | 20.97   | 34.03   | 19.28   | 14.37   |
| GAIF01011535.1 | 19.29   | 34.47  | 36.79   | 45.53   | 33.02   | 15.88   |
| GAIF01011539.1 | 1.42    | 0.84   | 0.07    | 13.82   | 22.41   | 0.21    |
| GAIF01011540.1 | 0       | 0      | 0       | 0       | 0.13    | 0       |
| GAIF01011541.1 | 0       | 0      | 0       | 0       | 0.85    | 0       |
| GAIF01011542.1 | 0       | 0      | 0       | 0       | 0.04    | 0       |
| GAIF01011543.1 | 0.17    | 0      | 0       | 0.29    | 1.09    | 0       |
| GAIF01011544.1 | 0.54    | 0      | 0.89    | 0.31    | 0       | 0       |
| GAIF01011547.1 | 1.6     | 0.24   | 0.05    | 0       | 0.1     | 0.1     |
| GAIF01011549.1 | 18.22   | 20.65  | 9.08    | 55.27   | 43.83   | 6.08    |
| GAIF01011550.1 | 11.77   | 6.38   | 4.66    | 22.96   | 24.89   | 46.25   |
| GAIF01011551.1 | 0       | 0.17   | 0.13    | 2.73    | 7.53    | 0.23    |
| GAIF01011555.1 | 0       | 0      | 0.16    | 0       | 0.15    | 0       |
| GAIF01011556.1 | 12.52   | 16.07  | 15.17   | 62.18   | 52.17   | 9.5     |
| GAIF01011558.1 | 0.4     | 0.5    | 0       | 4.04    | 15.57   | 0.63    |
| GAIF01011559.1 | 0.27    | 0      | 0       | 0       | 9.57    | 0.18    |
| GAIF01011560.1 | 3.18    | 0.82   | 0.17    | 1.05    | 5.82    | 0       |
| GAIF01011562.1 | 22.44   | 15.86  | 38.8    | 44.33   | 19.75   | 104.59  |
| GAIF01011563.1 | 0.04    | 0.08   | 0       | 0       | 0.09    | 0       |
| GAIF01011566.1 | 0       | 0.11   | 0.11    | 0       | 1.35    | 0.06    |
| GAIF01011568.1 | 0       | 0.43   | 0       | 0.46    | 4.97    | 0       |
| GAIF01011569.1 | 27.59   | 21.76  | 22.1    | 33.46   | 27.72   | 11.83   |
| GAIF01011570.1 | 0       | 0      | 0       | 0       | 0.6     | 0       |
| GAIF01011572.1 | 0.13    | 0      | 0       | 0.94    | 4.4     | 0.14    |
| GAIF01011573.1 | 0       | 0      | 0       | 0       | 0.02    | 0       |
| GAIF01011574.1 | 10.67   | 13.38  | 15.39   | 51.72   | 41.51   | 8.02    |
| GAIF01011576.1 | 11.67   | 4.64   | 4.46    | 21.31   | 28.61   | 9.16    |
| GAIF01011577.1 | 10.44   | 10.75  | 8.6     | 22.29   | 25.45   | 9.15    |
| GAIF01011578.1 | 9       | 8.77   | 8.49    | 15.87   | 6.34    | 4.22    |
| GAIF01011579.1 | 0       | 0      | 0       | 0       | 1.26    | 0       |
| GAIF01011580.1 | 0       | 0.71   | 0.44    | 0       | 0       | 0.18    |
| GAIF01011583.1 | 0.05    | 0      | 0       | 0       | 0       | 0       |
| GAIF01011584.1 | 0       | 0      | 0       | 0       | 0.22    | 0       |
| GAIF01011585.1 | 17.29   | 8.9    | 8.81    | 7.51    | 11.82   | 15.09   |
| GAIF01011587.1 | 58.88   | 130.42 | 75.08   | 210.09  | 201.59  | 28.83   |
| GAIF01011588.1 | 0       | 0      | 0       | 0.03    | 0.03    | 0       |
| GAIF01011589.1 | 0.4     | 0      | 0       | 1       | 4       | 0.33    |
| GAIF01011590.1 | 0.03    | 0      | 0       | 0       | 0       | 0       |
| GAIF01011591.1 | 0       | 0      | 0       | 0       | 0.16    | 0       |
| GAIF01011592.1 | 13.07   | 18.51  | 16.64   | 44.55   | 42.89   | 6.74    |
| GAIF01011594.1 | 0.42    | 0      | 0       | 0.16    | 0       | 0       |

|                |        |        |        |        |         |         |
|----------------|--------|--------|--------|--------|---------|---------|
| GAIF01011596.1 | 0      | 0      | 0      | 0      | 0.23    | 0       |
| GAIF01011597.1 | 0.08   | 0.17   | 0.26   | 2.14   | 8       | 0.44    |
| GAIF01011598.1 | 0.52   | 0.31   | 0.84   | 0.54   | 0.7     | 0.97    |
| GAIF01011600.1 | 6.45   | 5.54   | 0.99   | 12.42  | 35.81   | 1.43    |
| GAIF01011601.1 | 0      | 0.15   | 0      | 0.31   | 1.14    | 0       |
| GAIF01011602.1 | 0      | 0      | 0      | 0      | 0.08    | 0       |
| GAIF01011603.1 | 1.41   | 1.21   | 4.09   | 0      | 0       | 2.83    |
| GAIF01011604.1 | 0.02   | 0.08   | 0      | 0.04   | 0.02    | 0.08    |
| GAIF01011605.1 | 0.04   | 0.05   | 0      | 0      | 0       | 0       |
| GAIF01011606.1 | 0      | 1.36   | 1.37   | 0      | 0.07    | 0.29    |
| GAIF01011607.1 | 0.26   | 0.46   | 0      | 2.53   | 5.82    | 0       |
| GAIF01011608.1 | 0.4    | 0.29   | 0.15   | 0.92   | 1.44    | 0.29    |
| GAIF01011610.1 | 0      | 0      | 0      | 0.13   | 0       | 0       |
| GAIF01011612.1 | 4.68   | 3.87   | 1.99   | 18.73  | 3.5     | 3.66    |
| GAIF01011613.1 | 0      | 0.28   | 0      | 0      | 0.16    | 0       |
| GAIF01011614.1 | 0.77   | 0      | 0.24   | 0      | 0.07    | 0.06    |
| GAIF01011615.1 | 0.37   | 0      | 0.06   | 1.42   | 7.98    | 0.99    |
| GAIF01011616.1 | 0.47   | 1.94   | 0.54   | 0.21   | 5.97    | 0.04    |
| GAIF01011617.1 | 0.86   | 1.89   | 0.95   | 4.98   | 4.97    | 0.45    |
| GAIF01011618.1 | 0      | 0.24   | 0      | 0.38   | 0.79    | 0       |
| GAIF01011619.1 | 10.27  | 15.3   | 17.76  | 5.67   | 6.54    | 1.79    |
| GAIF01011620.1 | 0.07   | 0.38   | 0.07   | 0      | 0.12    | 0       |
| GAIF01011622.1 | 0      | 0      | 0      | 0.15   | 0.09    | 0       |
| GAIF01011623.1 | 22.37  | 19.93  | 13.2   | 30.28  | 19.89   | 6.94    |
| GAIF01011624.1 | 10.1   | 17.93  | 3.2    | 46.35  | 70.02   | 0.87    |
| GAIF01011625.1 | 18.99  | 21.67  | 15.17  | 40.18  | 28.98   | 4.21    |
| GAIF01011626.1 | 0.14   | 0.15   | 0.91   | 0.48   | 0.66    | 0       |
| GAIF01011629.1 | 0      | 0      | 0      | 0      | 0.08    | 0       |
| GAIF01011631.1 | 11.33  | 19.04  | 16.59  | 23.91  | 13.83   | 5.3     |
| GAIF01011632.1 | 8.24   | 13.08  | 7.56   | 7.65   | 5.46    | 0.77    |
| GAIF01011633.1 | 0      | 0.11   | 0      | 0      | 0.25    | 0       |
| GAIF01011634.1 | 0      | 0      | 0.12   | 0      | 0.55    | 0.87    |
| GAIF01011635.1 | 1.59   | 0.92   | 1.16   | 2.95   | 3.44    | 0.93    |
| GAIF01011636.1 | 930.08 | 194.12 | 139.5  | 916.19 | 1243.17 | 11354.3 |
| GAIF01011637.1 | 27.56  | 26.27  | 13.7   | 9.47   | 10.57   | 2.01    |
| GAIF01011638.1 | 107.22 | 225.99 | 105.82 | 220.51 | 117.71  | 25.05   |
| GAIF01011639.1 | 63.12  | 82.03  | 65.69  | 124.89 | 156.44  | 46.67   |
| GAIF01011641.1 | 18.34  | 27.97  | 18.86  | 9.93   | 6.25    | 1.73    |
| GAIF01011643.1 | 8.46   | 5.4    | 4.54   | 4.22   | 1.35    | 0.91    |
| GAIF01011645.1 | 57.93  | 45.46  | 21.42  | 188.41 | 147.21  | 31.86   |
| GAIF01011647.1 | 17.26  | 7.18   | 3.94   | 25.35  | 33.25   | 8.63    |
| GAIF01011649.1 | 0      | 0      | 0      | 0      | 0.39    | 0       |
| GAIF01011650.1 | 0.16   | 1.15   | 0.85   | 0.39   | 0.54    | 0.91    |
| GAIF01011652.1 | 0.28   | 0      | 0      | 0.03   | 0       | 0       |

|                |        |        |        |        |       |       |
|----------------|--------|--------|--------|--------|-------|-------|
| GAIF01011653.1 | 62.38  | 43.86  | 81.37  | 30.76  | 7.44  | 60.75 |
| GAIF01011656.1 | 0      | 0      | 0      | 0.36   | 0     | 0     |
| GAIF01011657.1 | 0.84   | 0      | 0      | 1.27   | 3.68  | 2.54  |
| GAIF01011658.1 | 2.28   | 4.09   | 0.08   | 1.85   | 5.56  | 2.49  |
| GAIF01011659.1 | 0.13   | 0.14   | 0.14   | 1.16   | 1.65  | 0.14  |
| GAIF01011661.1 | 0      | 0      | 0      | 0.04   | 0     | 0     |
| GAIF01011662.1 | 10.3   | 0      | 0.1    | 10.58  | 0.66  | 1.41  |
| GAIF01011664.1 | 0.65   | 0.28   | 0.14   | 0      | 0     | 0     |
| GAIF01011665.1 | 7.18   | 11.49  | 10.95  | 22.2   | 14.5  | 3.37  |
| GAIF01011666.1 | 9.37   | 7.55   | 4.51   | 16.61  | 16.46 | 1.91  |
| GAIF01011667.1 | 1.26   | 2.17   | 1.78   | 4.09   | 1.29  | 0.66  |
| GAIF01011668.1 | 0      | 0      | 0      | 0.09   | 0.55  | 0     |
| GAIF01011669.1 | 6.64   | 2.86   | 7.25   | 3.51   | 2.04  | 6.59  |
| GAIF01011670.1 | 0.77   | 0.84   | 1.53   | 0.36   | 0.56  | 0     |
| GAIF01011672.1 | 0.12   | 0      | 0      | 0.28   | 6.46  | 0     |
| GAIF01011673.1 | 3.69   | 0.89   | 0.34   | 1.89   | 7.76  | 27.33 |
| GAIF01011674.1 | 1.19   | 4.8    | 7.24   | 0.24   | 0     | 1.14  |
| GAIF01011675.1 | 0.1    | 0.29   | 0      | 0      | 0.08  | 0     |
| GAIF01011678.1 | 0.35   | 0      | 0      | 1.77   | 6.35  | 0.23  |
| GAIF01011679.1 | 0.14   | 0      | 0      | 0      | 0.98  | 0     |
| GAIF01011680.1 | 0.2    | 0.53   | 0      | 1.13   | 1.64  | 0     |
| GAIF01011681.1 | 0      | 0.3    | 0.1    | 0      | 0     | 0     |
| GAIF01011682.1 | 0      | 0      | 0      | 0.31   | 0     | 0     |
| GAIF01011683.1 | 29.07  | 39.51  | 42.04  | 114.85 | 78.26 | 36.21 |
| GAIF01011685.1 | 0      | 0.05   | 0      | 0      | 0     | 0     |
| GAIF01011686.1 | 0      | 0      | 0      | 0      | 0.1   | 0     |
| GAIF01011687.1 | 107.45 | 170.66 | 150.37 | 123.72 | 96.93 | 33.38 |
| GAIF01011691.1 | 0      | 0.26   | 0      | 0.3    | 0.16  | 0.04  |
| GAIF01011693.1 | 10.19  | 13.09  | 10.2   | 23.48  | 6.22  | 1.34  |
| GAIF01011694.1 | 0.12   | 0      | 0      | 0      | 0.29  | 0     |
| GAIF01011696.1 | 23.74  | 29.06  | 49.05  | 164.64 | 77.64 | 27.01 |
| GAIF01011697.1 | 0      | 0      | 0.03   | 0      | 0.12  | 0     |
| GAIF01011699.1 | 0.24   | 0.52   | 0      | 2.78   | 8.84  | 0.26  |
| GAIF01011700.1 | 0.08   | 0.03   | 0      | 0.44   | 3.12  | 0.25  |
| GAIF01011701.1 | 0      | 0.1    | 0.44   | 0      | 0.36  | 0.22  |
| GAIF01011702.1 | 13.57  | 5.9    | 6.06   | 8.75   | 8.28  | 8.22  |
| GAIF01011708.1 | 0.95   | 0.32   | 0.08   | 4.47   | 14.69 | 0.32  |
| GAIF01011709.1 | 2.28   | 2.87   | 2.63   | 5.98   | 12.11 | 0.4   |
| GAIF01011710.1 | 52.55  | 69.56  | 46.81  | 79.38  | 24.48 | 12.9  |
| GAIF01011711.1 | 12.83  | 0.22   | 7.04   | 59.79  | 33.09 | 79.12 |
| GAIF01011716.1 | 0      | 0      | 0      | 0      | 0.31  | 0     |
| GAIF01011717.1 | 2.21   | 0.21   | 0.04   | 5.43   | 18.33 | 29.91 |
| GAIF01011718.1 | 0.35   | 1.6    | 0.44   | 1.22   | 3.9   | 0.29  |
| GAIF01011721.1 | 0.94   | 0.51   | 0      | 0.43   | 0.29  | 0     |

|                |       |       |       |        |        |        |
|----------------|-------|-------|-------|--------|--------|--------|
| GAIF01011722.1 | 35.77 | 18.44 | 27.27 | 95.42  | 203.68 | 316.25 |
| GAIF01011723.1 | 5.65  | 0.29  | 0.44  | 5.3    | 0      | 1.11   |
| GAIF01011725.1 | 0.49  | 1.5   | 0.43  | 0.57   | 0.47   | 0      |
| GAIF01011727.1 | 0     | 0     | 0     | 0.02   | 0.51   | 0.04   |
| GAIF01011729.1 | 0.03  | 0.09  | 0.06  | 0.4    | 2.15   | 0.09   |
| GAIF01011730.1 | 0.14  | 0.07  | 0     | 0      | 0.03   | 0      |
| GAIF01011731.1 | 24.97 | 37.59 | 70.92 | 21.4   | 17.35  | 11.96  |
| GAIF01011732.1 | 0.7   | 0.86  | 0.5   | 3.9    | 6.89   | 0.73   |
| GAIF01011733.1 | 0.14  | 0.21  | 0.05  | 0.16   | 0.11   | 0      |
| GAIF01011736.1 | 3.48  | 4.66  | 1.61  | 18.2   | 18.14  | 0.39   |
| GAIF01011737.1 | 2     | 3.94  | 1.44  | 0.51   | 0.75   | 0      |
| GAIF01011738.1 | 22.73 | 32.16 | 7.73  | 0.66   | 0.46   | 0.21   |
| GAIF01011739.1 | 5.54  | 6.44  | 2.22  | 17.95  | 26.42  | 0.8    |
| GAIF01011740.1 | 0.07  | 0.04  | 0     | 0      | 0.04   | 0      |
| GAIF01011741.1 | 0.1   | 0     | 0     | 0.45   | 4.89   | 0      |
| GAIF01011742.1 | 0     | 0.09  | 0     | 0      | 0      | 0      |
| GAIF01011743.1 | 0     | 0.09  | 0     | 0.09   | 0.96   | 0      |
| GAIF01011744.1 | 2.22  | 2.13  | 1.16  | 0.35   | 0      | 0.34   |
| GAIF01011745.1 | 8.37  | 18.27 | 18.89 | 28.75  | 18.19  | 7.16   |
| GAIF01011747.1 | 9.94  | 12.19 | 4.68  | 22.49  | 16.93  | 1.91   |
| GAIF01011748.1 | 4.41  | 1.84  | 0     | 7.08   | 12.55  | 11.32  |
| GAIF01011749.1 | 8.97  | 12.61 | 7.36  | 41.57  | 33.88  | 3.97   |
| GAIF01011750.1 | 0     | 0     | 0     | 0      | 0.08   | 0      |
| GAIF01011751.1 | 8.01  | 18.95 | 8.62  | 35.86  | 40.78  | 1.68   |
| GAIF01011753.1 | 12.09 | 20.48 | 18.18 | 51.46  | 36.91  | 11.29  |
| GAIF01011754.1 | 48.18 | 104.4 | 73.51 | 144.13 | 128.28 | 16.92  |
| GAIF01011755.1 | 13.96 | 25.42 | 21.46 | 65.3   | 62.3   | 51.83  |
| GAIF01011756.1 | 28.87 | 26.45 | 19.46 | 57.67  | 30.49  | 40.97  |
| GAIF01011757.1 | 0     | 0.04  | 0     | 1.15   | 4.23   | 0.08   |
| GAIF01011759.1 | 0.86  | 0.06  | 0.22  | 2.59   | 7.14   | 5.87   |
| GAIF01011760.1 | 0     | 0.61  | 0.97  | 0      | 0      | 0.62   |
| GAIF01011761.1 | 6.94  | 0.64  | 0     | 2.06   | 0      | 0      |
| GAIF01011762.1 | 0     | 0.14  | 0.28  | 0.88   | 3.8    | 0      |
| GAIF01011763.1 | 22.43 | 23.88 | 15.02 | 78.92  | 46.27  | 12.18  |
| GAIF01011764.1 | 0.94  | 0.2   | 0     | 0.81   | 0.25   | 0      |
| GAIF01011765.1 | 4.97  | 5.07  | 3.23  | 25.94  | 21.32  | 2.4    |
| GAIF01011766.1 | 14.46 | 8.86  | 12.48 | 24.93  | 25.26  | 15.54  |
| GAIF01011767.1 | 0     | 0     | 0     | 0.21   | 0.22   | 0      |
| GAIF01011768.1 | 0.14  | 0.08  | 0     | 1.63   | 6.13   | 0.15   |
| GAIF01011769.1 | 0     | 0.73  | 0.73  | 0      | 0.04   | 0.08   |
| GAIF01011772.1 | 0.61  | 0.6   | 0.32  | 0.45   | 0.43   | 0.58   |
| GAIF01011773.1 | 21.01 | 17.81 | 6.83  | 63.94  | 49.72  | 4.26   |
| GAIF01011774.1 | 9.41  | 7.89  | 1.18  | 46.06  | 64.64  | 0.49   |
| GAIF01011775.1 | 0.07  | 0.08  | 0     | 0.09   | 0      | 0      |



|                |        |        |        |        |        |       |
|----------------|--------|--------|--------|--------|--------|-------|
| GAIF01011776.1 | 4.92   | 0.12   | 0.47   | 0      | 8.51   | 0     |
| GAIF01011777.1 | 0.25   | 0      | 0.07   | 0.22   | 1.66   | 0.07  |
| GAIF01011778.1 | 15.49  | 9.72   | 8.97   | 55.6   | 65.25  | 21.32 |
| GAIF01011779.1 | 5.23   | 2.57   | 1.22   | 13.8   | 16.92  | 3.57  |
| GAIF01011780.1 | 0      | 0.18   | 0      | 0      | 0.49   | 0.22  |
| GAIF01011782.1 | 10.52  | 9.41   | 3.79   | 34.74  | 17.16  | 2.89  |
| GAIF01011783.1 | 0      | 0      | 0      | 0.62   | 2.82   | 0     |
| GAIF01011784.1 | 0.05   | 0.05   | 0      | 0      | 0.05   | 0     |
| GAIF01011786.1 | 0      | 0.17   | 0.17   | 0.01   | 0      | 0.05  |
| GAIF01011788.1 | 0      | 0      | 0      | 0.04   | 0.56   | 0     |
| GAIF01011789.1 | 15.6   | 14.03  | 17.86  | 46.52  | 41.13  | 12.63 |
| GAIF01011790.1 | 5.36   | 1.86   | 4.71   | 7.59   | 2.71   | 18.07 |
| GAIF01011791.1 | 417.19 | 207.45 | 170.84 | 214.56 | 68.64  | 142.5 |
| GAIF01011792.1 | 51.06  | 66.93  | 55.07  | 80.19  | 55.68  | 12.26 |
| GAIF01011793.1 | 0.29   | 0      | 0      | 0      | 0      | 0     |
| GAIF01011794.1 | 0      | 0      | 0      | 0.01   | 0.04   | 0     |
| GAIF01011796.1 | 10.7   | 17.12  | 0      | 34.49  | 117.11 | 0.98  |
| GAIF01011797.1 | 0      | 0.09   | 0      | 0.28   | 0.97   | 0     |
| GAIF01011798.1 | 0      | 0.48   | 0.15   | 0      | 0      | 0.1   |
| GAIF01011800.1 | 0.48   | 0.2    | 0      | 0.38   | 0.38   | 0.14  |
| GAIF01011801.1 | 0.17   | 0      | 0      | 0      | 0      | 0     |
| GAIF01011802.1 | 0      | 0      | 0      | 0      | 0.38   | 0     |
| GAIF01011803.1 | 0      | 0.32   | 0      | 0      | 1.33   | 0     |
| GAIF01011804.1 | 0      | 0      | 0      | 0      | 0      | 0.05  |
| GAIF01011805.1 | 0.77   | 0.09   | 0.06   | 1.79   | 15.76  | 0.45  |
| GAIF01011807.1 | 0      | 0.05   | 0      | 0.06   | 0.18   | 0     |
| GAIF01011808.1 | 0      | 0      | 0      | 0      | 0.19   | 0     |
| GAIF01011809.1 | 0      | 0.29   | 0      | 0      | 0      | 0     |
| GAIF01011811.1 | 2.5    | 1.88   | 0      | 6.72   | 34.08  | 1.01  |
| GAIF01011812.1 | 0.22   | 0      | 0      | 0.39   | 1.61   | 0.74  |
| GAIF01011814.1 | 0.11   | 0.05   | 0      | 0.46   | 0.48   | 0     |
| GAIF01011815.1 | 0      | 0      | 0      | 0      | 0      | 0.12  |
| GAIF01011816.1 | 0.4    | 0.33   | 0      | 0.58   | 0.97   | 0     |
| GAIF01011817.1 | 27.96  | 18.51  | 19.8   | 34.22  | 24.74  | 13.27 |
| GAIF01011818.1 | 0      | 0.63   | 0      | 0      | 0      | 0     |
| GAIF01011819.1 | 0.35   | 0.2    | 0.03   | 1.7    | 7.72   | 0     |
| GAIF01011821.1 | 5.5    | 0.76   | 0.55   | 2.11   | 0.8    | 0.09  |
| GAIF01011822.1 | 0.43   | 0.18   | 0.06   | 1.89   | 5.94   | 0.36  |
| GAIF01011823.1 | 0.09   | 0.05   | 0      | 0.35   | 0.6    | 0.24  |
| GAIF01011825.1 | 0.49   | 0.26   | 0.32   | 7.33   | 28.86  | 0.11  |
| GAIF01011826.1 | 0.21   | 0.23   | 0.23   | 0      | 0.26   | 0     |
| GAIF01011829.1 | 0.4    | 0.22   | 0      | 1.36   | 6.01   | 0.04  |
| GAIF01011830.1 | 0.15   | 0.49   | 0.08   | 2.28   | 4.63   | 0.25  |
| GAIF01011831.1 | 3.35   | 1.63   | 2.03   | 0.67   | 0.56   | 0.25  |

|                |        |         |         |        |        |        |
|----------------|--------|---------|---------|--------|--------|--------|
| GAIF01011833.1 | 1.93   | 3.89    | 3.68    | 1.14   | 0      | 0.23   |
| GAIF01011834.1 | 0      | 0       | 0       | 0      | 0.17   | 0      |
| GAIF01011835.1 | 26.29  | 12.48   | 18.25   | 29.42  | 16.01  | 18.09  |
| GAIF01011840.1 | 61.39  | 62.28   | 101.39  | 25.75  | 30.48  | 153.04 |
| GAIF01011842.1 | 0.25   | 0.05    | 0       | 0.12   | 1.21   | 0.23   |
| GAIF01011845.1 | 1.34   | 2.55    | 3.56    | 6.48   | 10.34  | 7.63   |
| GAIF01011846.1 | 0.14   | 0.15    | 0.31    | 0      | 0.17   | 0      |
| GAIF01011847.1 | 28.08  | 17.17   | 6.84    | 25.97  | 39.78  | 12.05  |
| GAIF01011851.1 | 0      | 0       | 0       | 0.03   | 0      | 0      |
| GAIF01011852.1 | 0.08   | 0       | 0       | 0.15   | 0.08   | 0      |
| GAIF01011853.1 | 0      | 0       | 0       | 0.07   | 0      | 0      |
| GAIF01011856.1 | 27.95  | 35.84   | 13.48   | 7.71   | 2.86   | 0.14   |
| GAIF01011858.1 | 0      | 0       | 0       | 0.17   | 0.71   | 0      |
| GAIF01011859.1 | 7.64   | 16.98   | 7.07    | 23.82  | 15.29  | 1.28   |
| GAIF01011862.1 | 0.9    | 0.49    | 0.99    | 1.69   | 4.18   | 0      |
| GAIF01011863.1 | 11.01  | 3.83    | 2.65    | 39.8   | 61.18  | 4.2    |
| GAIF01011864.1 | 8.4    | 1.06    | 0.08    | 0      | 0      | 0      |
| GAIF01011865.1 | 0      | 0       | 0       | 0      | 0.05   | 0      |
| GAIF01011866.1 | 68.49  | 46.13   | 41.95   | 38.27  | 18.3   | 10.54  |
| GAIF01011867.1 | 25.69  | 25.22   | 32.04   | 0.72   | 0.45   | 0.14   |
| GAIF01011868.1 | 0.67   | 0       | 0       | 1.55   | 15.42  | 0.61   |
| GAIF01011869.1 | 0      | 0       | 0.05    | 0      | 0      | 0.05   |
| GAIF01011870.1 | 3.37   | 3.45    | 0       | 3.84   | 0      | 0      |
| GAIF01011871.1 | 0      | 0.02    | 0       | 0      | 0.09   | 0      |
| GAIF01011872.1 | 0      | 0       | 0       | 0.02   | 0.27   | 0      |
| GAIF01011874.1 | 0      | 0       | 0       | 0.15   | 0.15   | 0      |
| GAIF01011875.1 | 0      | 0.09    | 0       | 0.1    | 0.42   | 0      |
| GAIF01011876.1 | 0      | 0.09    | 0       | 0.5    | 7.39   | 0      |
| GAIF01011877.1 | 0.83   | 0.1     | 0       | 1.04   | 2.48   | 0      |
| GAIF01011878.1 | 0      | 0       | 0       | 0      | 0.4    | 0      |
| GAIF01011879.1 | 0.81   | 0.68    | 0.41    | 3.01   | 9.83   | 0.17   |
| GAIF01011880.1 | 6.39   | 5.86    | 5.7     | 2.43   | 4.16   | 3.44   |
| GAIF01011881.1 | 0      | 0       | 0       | 0.22   | 0      | 0      |
| GAIF01011882.1 | 0.32   | 0       | 0.43    | 0      | 1.12   | 1.17   |
| GAIF01011883.1 | 1.11   | 0.83    | 0.98    | 1.3    | 1.84   | 1.98   |
| GAIF01011884.1 | 0      | 0       | 0       | 0      | 0      | 203.14 |
| GAIF01011885.1 | 1.3    | 1.18    | 0.98    | 0.68   | 1.68   | 0.62   |
| GAIF01011889.1 | 121.1  | 127.3   | 128.29  | 137.72 | 106.18 | 66.58  |
| GAIF01011890.1 | 0      | 0       | 0.07    | 0      | 0      | 0      |
| GAIF01011892.1 | 1225.3 | 1079.47 | 1255.89 | 2.37   | 4.27   | 2.73   |
| GAIF01011894.1 | 0      | 0       | 0       | 0.11   | 0.24   | 0      |
| GAIF01011896.1 | 0.16   | 0.09    | 0.04    | 0.05   | 0      | 0      |
| GAIF01011897.1 | 4.19   | 2.68    | 0       | 2.6    | 9.94   | 2.21   |
| GAIF01011898.1 | 1.17   | 3.07    | 1.59    | 3.6    | 2.91   | 0.36   |

|                |         |         |         |        |        |        |
|----------------|---------|---------|---------|--------|--------|--------|
| GAIF01011899.1 | 43.71   | 9.5     | 47.98   | 0      | 0      | 0      |
| GAIF01011901.1 | 1.11    | 0.4     | 0.61    | 0.64   | 0.22   | 0.25   |
| GAIF01011902.1 | 2.76    | 6       | 3.03    | 3.2    | 3.32   | 0      |
| GAIF01011903.1 | 1.16    | 0.37    | 0       | 4.12   | 24.05  | 3.28   |
| GAIF01011904.1 | 0       | 0.01    | 0.04    | 0.47   | 2.18   | 0.22   |
| GAIF01011905.1 | 0       | 0       | 0       | 0      | 0.17   | 0      |
| GAIF01011906.1 | 21.26   | 17.59   | 3.19    | 109.16 | 82.94  | 4.5    |
| GAIF01011908.1 | 0       | 0       | 0.05    | 0      | 0      | 0      |
| GAIF01011909.1 | 17.41   | 13.03   | 12.21   | 16.14  | 16.36  | 9.97   |
| GAIF01011910.1 | 0.25    | 0       | 0       | 0.32   | 0      | 0      |
| GAIF01011911.1 | 0.8     | 0.74    | 0.75    | 2.25   | 1.78   | 0      |
| GAIF01011913.1 | 2.26    | 0.57    | 0.66    | 18.5   | 53.62  | 3.56   |
| GAIF01011915.1 | 36.79   | 31.81   | 36.42   | 47.66  | 15.91  | 25.97  |
| GAIF01011916.1 | 17.97   | 11.33   | 9.61    | 52.32  | 74.4   | 6.18   |
| GAIF01011917.1 | 1693.56 | 1250.16 | 1556.63 | 811.27 | 549.32 | 694.36 |
| GAIF01011919.1 | 35.8    | 19.04   | 20.33   | 76.15  | 86.36  | 19.98  |
| GAIF01011920.1 | 0       | 0.09    | 0       | 0      | 0      | 0      |
| GAIF01011921.1 | 0       | 0       | 0.03    | 0      | 0      | 0      |
| GAIF01011923.1 | 0.54    | 0       | 0       | 2.97   | 12.17  | 0.23   |
| GAIF01011926.1 | 23.45   | 15.58   | 15.34   | 41.29  | 35.12  | 29.71  |
| GAIF01011928.1 | 0       | 0.09    | 0.27    | 0      | 0.2    | 0.09   |
| GAIF01011929.1 | 3.7     | 10.91   | 6.05    | 20.82  | 11.77  | 0.91   |
| GAIF01011930.1 | 0       | 0       | 0       | 0.04   | 0.09   | 0      |
| GAIF01011931.1 | 0.11    | 0.24    | 0.24    | 1.01   | 0.26   | 0.12   |
| GAIF01011933.1 | 1.08    | 0       | 0.61    | 0      | 0      | 0      |
| GAIF01011935.1 | 0.02    | 0.11    | 0       | 0.14   | 0.16   | 0.01   |
| GAIF01011936.1 | 5.58    | 2.74    | 3.64    | 1.29   | 0      | 1.9    |
| GAIF01011937.1 | 0.25    | 0.05    | 0.05    | 0.37   | 1.83   | 0      |
| GAIF01011938.1 | 0.09    | 0.09    | 0.09    | 0.53   | 0.45   | 0.13   |
| GAIF01011939.1 | 30.68   | 29.6    | 25.77   | 67.85  | 43.23  | 6.14   |
| GAIF01011940.1 | 0.09    | 0.09    | 0       | 1.61   | 1.25   | 0.19   |
| GAIF01011941.1 | 0       | 0       | 0       | 0      | 0      | 0.4    |
| GAIF01011944.1 | 0       | 1.55    | 13.15   | 0      | 0      | 0.09   |
| GAIF01011945.1 | 19.82   | 37.67   | 17.53   | 52.44  | 38.18  | 3.52   |
| GAIF01011947.1 | 11.33   | 20.06   | 13.43   | 17.33  | 16.41  | 4.2    |
| GAIF01011948.1 | 0.93    | 1.37    | 2.25    | 1.61   | 1.89   | 2.21   |
| GAIF01011950.1 | 0       | 0       | 0       | 0.18   | 0.17   | 0      |
| GAIF01011951.1 | 0       | 0.03    | 0.1     | 0.34   | 0      | 0      |
| GAIF01011952.1 | 7.89    | 38.09   | 49.71   | 39.73  | 66.76  | 69.96  |
| GAIF01011953.1 | 7.71    | 10.37   | 0       | 7.09   | 14.39  | 0.39   |
| GAIF01011954.1 | 0       | 0.73    | 2.22    | 0      | 0.15   | 0.4    |
| GAIF01011955.1 | 5.33    | 1.46    | 4.27    | 2.51   | 0.59   | 2.37   |
| GAIF01011957.1 | 0       | 0.62    | 1.47    | 0      | 0      | 0.53   |
| GAIF01011958.1 | 0       | 0.03    | 0       | 0.34   | 1.23   | 0.16   |

|                |        |       |        |        |        |         |
|----------------|--------|-------|--------|--------|--------|---------|
| GAIF01011961.1 | 56.7   | 42.76 | 102.12 | 13     | 6.6    | 15.08   |
| GAIF01011963.1 | 0.36   | 0.39  | 0.26   | 0      | 0.14   | 0       |
| GAIF01011964.1 | 10.09  | 19.84 | 14.15  | 22.43  | 17.9   | 4.54    |
| GAIF01011965.1 | 0      | 0.07  | 0      | 0      | 0      | 0       |
| GAIF01011967.1 | 0.38   | 0     | 0      | 0      | 0      | 0       |
| GAIF01011968.1 | 2.23   | 0.9   | 1.29   | 0      | 0      | 0       |
| GAIF01011971.1 | 0      | 0.38  | 0      | 2.22   | 4.96   | 0.38    |
| GAIF01011973.1 | 58.25  | 57.12 | 50.63  | 72.58  | 76.86  | 107.38  |
| GAIF01011974.1 | 0      | 0     | 0      | 0.52   | 0.57   | 0       |
| GAIF01011975.1 | 1.91   | 3.74  | 0.36   | 0      | 0.17   | 0.53    |
| GAIF01011976.1 | 64.63  | 50.67 | 93.79  | 83.2   | 41.44  | 22.43   |
| GAIF01011977.1 | 31.95  | 48.9  | 15.01  | 59.29  | 74.03  | 1.92    |
| GAIF01011981.1 | 77.28  | 61.12 | 34.13  | 94.93  | 61.92  | 25.32   |
| GAIF01011982.1 | 3.22   | 1.75  | 3.24   | 5.6    | 8.17   | 8.28    |
| GAIF01011984.1 | 145.31 | 70.14 | 139.21 | 82.37  | 100.74 | 16.49   |
| GAIF01011985.1 | 1.84   | 0.53  | 0      | 10.2   | 25.63  | 0.36    |
| GAIF01011986.1 | 0      | 0     | 0      | 0.03   | 0.42   | 0       |
| GAIF01011987.1 | 0      | 0     | 0      | 0      | 0.23   | 0.3     |
| GAIF01011990.1 | 13.11  | 14.26 | 28.79  | 24.56  | 23.34  | 31.2    |
| GAIF01011991.1 | 0.15   | 0.16  | 0      | 0.56   | 2.22   | 0       |
| GAIF01011992.1 | 0      | 0     | 0      | 0.18   | 0.1    | 0       |
| GAIF01011995.1 | 5.86   | 4.94  | 5.5    | 16.55  | 9.36   | 7.39    |
| GAIF01011997.1 | 1.08   | 0.7   | 0.79   | 2.58   | 8.36   | 0.47    |
| GAIF01011998.1 | 5.9    | 2.2   | 0.55   | 6.78   | 6.91   | 1.2     |
| GAIF01012001.1 | 15.67  | 9.64  | 1.12   | 36.9   | 70.12  | 3.02    |
| GAIF01012002.1 | 0.66   | 0.36  | 0      | 4.22   | 6.86   | 0       |
| GAIF01012004.1 | 0.8    | 0.17  | 0.18   | 2.78   | 10.94  | 0.44    |
| GAIF01012005.1 | 7.89   | 8.76  | 4.78   | 68.35  | 141.01 | 9.22    |
| GAIF01012006.1 | 0      | 0     | 0      | 0.26   | 0      | 0       |
| GAIF01012007.1 | 0      | 0     | 0      | 0      | 0.06   | 0       |
| GAIF01012008.1 | 9.93   | 3.81  | 3.58   | 19.49  | 45.37  | 40.46   |
| GAIF01012011.1 | 0      | 0     | 0      | 0      | 0.74   | 0       |
| GAIF01012012.1 | 2.93   | 6.37  | 6.34   | 16.63  | 8.85   | 1.13    |
| GAIF01012013.1 | 2.02   | 1.94  | 0.6    | 9.49   | 12.12  | 0.85    |
| GAIF01012014.1 | 0      | 0     | 0.15   | 0      | 0      | 0       |
| GAIF01012016.1 | 1.29   | 0.94  | 0.28   | 12.38  | 23.7   | 0.09    |
| GAIF01012018.1 | 0.29   | 1.34  | 0      | 4.67   | 9.74   | 0.09    |
| GAIF01012019.1 | 0.06   | 0.06  | 0.32   | 0      | 0      | 0.32    |
| GAIF01012020.1 | 0.1    | 0     | 0      | 0      | 0      | 0       |
| GAIF01012021.1 | 32.92  | 17.8  | 5.96   | 43.66  | 45.83  | 15.69   |
| GAIF01012022.1 | 0.19   | 0.29  | 0.33   | 0.67   | 0.39   | 0.64    |
| GAIF01012023.1 | 184.04 | 63.51 | 63.02  | 353.59 | 590.44 | 2448.96 |
| GAIF01012024.1 | 40.73  | 2.12  | 0.4    | 18.6   | 240.24 | 616.58  |
| GAIF01012025.1 | 0      | 1.36  | 0      | 0      | 0      | 0       |

|                |       |       |       |       |       |       |
|----------------|-------|-------|-------|-------|-------|-------|
| GAIF01012027.1 | 9.13  | 13.1  | 9.83  | 33.63 | 37    | 5.37  |
| GAIF01012028.1 | 30.17 | 0.12  | 0     | 0.02  | 0.79  | 0.05  |
| GAIF01012031.1 | 0     | 0     | 0     | 0.47  | 1.16  | 0.25  |
| GAIF01012034.1 | 0     | 0     | 0     | 0     | 0.86  | 0     |
| GAIF01012037.1 | 0.06  | 0.06  | 0     | 0     | 0     | 0     |
| GAIF01012038.1 | 0.81  | 0.15  | 0.15  | 2.03  | 31.05 | 1.58  |
| GAIF01012039.1 | 0.03  | 0     | 0.04  | 0.31  | 0.32  | 0.1   |
| GAIF01012040.1 | 8.17  | 4.91  | 4.54  | 28.62 | 21.14 | 6.54  |
| GAIF01012041.1 | 0.1   | 0.06  | 0.23  | 0.58  | 0.62  | 1.39  |
| GAIF01012042.1 | 0     | 0     | 0     | 0     | 0.13  | 0     |
| GAIF01012043.1 | 0.56  | 0.3   | 0     | 1.73  | 3.04  | 0.15  |
| GAIF01012044.1 | 0.05  | 0     | 0     | 0.27  | 1.62  | 0.31  |
| GAIF01012045.1 | 0.07  | 0.07  | 0.05  | 0.2   | 0.07  | 0.04  |
| GAIF01012047.1 | 0.47  | 0.53  | 0.72  | 0.14  | 0.08  | 0.32  |
| GAIF01012050.1 | 0     | 0     | 0.03  | 0.07  | 0.21  | 0     |
| GAIF01012052.1 | 0     | 0     | 0     | 0     | 0.16  | 0     |
| GAIF01012053.1 | 0     | 0.22  | 0.56  | 0.65  | 0.58  | 0     |
| GAIF01012055.1 | 0.33  | 0     | 0.04  | 0.28  | 0.33  | 0.1   |
| GAIF01012057.1 | 0     | 0     | 0     | 0     | 0.1   | 0     |
| GAIF01012058.1 | 0     | 0     | 0     | 0     | 0.37  | 0.01  |
| GAIF01012059.1 | 0     | 0     | 0.65  | 3.04  | 2.58  | 0     |
| GAIF01012061.1 | 5.95  | 7.46  | 6.03  | 5.44  | 3.85  | 1.13  |
| GAIF01012062.1 | 11.56 | 20.89 | 12.19 | 6.79  | 3.97  | 3.31  |
| GAIF01012063.1 | 0.31  | 0.25  | 0     | 0.27  | 0.33  | 0.08  |
| GAIF01012064.1 | 0     | 0     | 0.19  | 0.2   | 0.2   | 0     |
| GAIF01012066.1 | 4.26  | 2.91  | 0.53  | 2.39  | 2.56  | 0     |
| GAIF01012067.1 | 0     | 0     | 0     | 0     | 0     | 0.08  |
| GAIF01012069.1 | 0.06  | 0.03  | 0     | 0.26  | 1.12  | 0.2   |
| GAIF01012071.1 | 0     | 0     | 0     | 1.45  | 3.53  | 0     |
| GAIF01012072.1 | 0.16  | 0     | 0     | 0     | 0     | 0     |
| GAIF01012077.1 | 1.97  | 5.44  | 1.59  | 3.05  | 3.17  | 0.15  |
| GAIF01012078.1 | 0     | 0     | 0     | 1.7   | 3.52  | 0     |
| GAIF01012081.1 | 1.84  | 2.52  | 1.61  | 4.2   | 6.27  | 1.64  |
| GAIF01012083.1 | 0     | 0     | 0.33  | 0     | 0     | 0     |
| GAIF01012084.1 | 1.41  | 1.5   | 0     | 2.88  | 1.64  | 2.85  |
| GAIF01012086.1 | 4.89  | 4.79  | 5.37  | 25.9  | 59.81 | 8.12  |
| GAIF01012087.1 | 0.06  | 0     | 0.06  | 0.07  | 0.21  | 0     |
| GAIF01012088.1 | 0     | 5.35  | 4.75  | 0     | 0     | 0     |
| GAIF01012089.1 | 0     | 0     | 0.5   | 0.51  | 2.12  | 0     |
| GAIF01012090.1 | 0     | 0     | 0     | 0     | 2.63  | 0     |
| GAIF01012091.1 | 17.4  | 11.1  | 13.33 | 22.43 | 20.59 | 16.53 |
| GAIF01012092.1 | 0     | 0     | 0     | 0.7   | 2.16  | 0     |
| GAIF01012093.1 | 7     | 1.14  | 0.11  | 14.07 | 36.06 | 9.44  |
| GAIF01012096.1 | 0.46  | 0.24  | 0.42  | 2.17  | 4.56  | 0     |

|                |        |        |        |        |        |        |
|----------------|--------|--------|--------|--------|--------|--------|
| GAIF01012097.1 | 0.1    | 0.22   | 0.11   | 1.4    | 4.13   | 0.47   |
| GAIF01012098.1 | 0      | 0      | 0      | 2.08   | 1.12   | 15.09  |
| GAIF01012099.1 | 0.28   | 0.1    | 0.1    | 0.54   | 1.45   | 0      |
| GAIF01012101.1 | 1.25   | 1.11   | 2.94   | 0.59   | 0      | 0.39   |
| GAIF01012103.1 | 24.19  | 17.15  | 18.92  | 2.5    | 1.06   | 2.37   |
| GAIF01012104.1 | 0.09   | 0      | 0      | 0      | 0      | 0      |
| GAIF01012105.1 | 0      | 0      | 0.17   | 0.36   | 5.79   | 0      |
| GAIF01012107.1 | 0      | 0.08   | 0.16   | 0      | 0      | 0.16   |
| GAIF01012108.1 | 0      | 0      | 0.14   | 0      | 0      | 0      |
| GAIF01012109.1 | 0.27   | 0.24   | 0      | 1.19   | 6.93   | 0      |
| GAIF01012111.1 | 1.03   | 1.4    | 2.15   | 0      | 0      | 0      |
| GAIF01012113.1 | 82.11  | 52.68  | 52.96  | 83.92  | 45.46  | 20.19  |
| GAIF01012114.1 | 14.07  | 5.88   | 1.78   | 32.1   | 93.11  | 1.97   |
| GAIF01012115.1 | 2.46   | 0.53   | 0.08   | 2.36   | 3.29   | 0      |
| GAIF01012116.1 | 1.39   | 1.63   | 2.84   | 6.71   | 6.94   | 4.47   |
| GAIF01012118.1 | 0.3    | 0.26   | 0.26   | 0.21   | 0.36   | 0.33   |
| GAIF01012119.1 | 14.7   | 18.37  | 6.41   | 43.21  | 84.18  | 0.98   |
| GAIF01012121.1 | 0.07   | 0      | 0      | 0.04   | 0.17   | 0      |
| GAIF01012122.1 | 0.18   | 0.85   | 0.25   | 0.18   | 0.75   | 0      |
| GAIF01012123.1 | 0.22   | 0.06   | 0.06   | 0.65   | 1.22   | 0      |
| GAIF01012124.1 | 0      | 0      | 0      | 0      | 0.14   | 0      |
| GAIF01012125.1 | 8.49   | 9.98   | 9.08   | 19.03  | 23.94  | 3.8    |
| GAIF01012126.1 | 51.02  | 26.48  | 12.96  | 23.44  | 30.9   | 8.62   |
| GAIF01012127.1 | 0      | 0      | 0.25   | 0      | 0      | 0      |
| GAIF01012128.1 | 23.08  | 45.19  | 6.75   | 30.47  | 28.3   | 1.36   |
| GAIF01012129.1 | 0      | 0      | 0      | 0      | 0.37   | 0      |
| GAIF01012131.1 | 12.04  | 12.2   | 5.54   | 5.26   | 3.22   | 0.91   |
| GAIF01012132.1 | 8.86   | 19.7   | 15.54  | 24.87  | 14.32  | 3.21   |
| GAIF01012133.1 | 69.79  | 64.34  | 43.12  | 104.69 | 123.85 | 71.75  |
| GAIF01012134.1 | 0      | 0.25   | 0      | 0.27   | 4.18   | 0      |
| GAIF01012135.1 | 0.37   | 0.1    | 0.19   | 0.99   | 1.27   | 2.54   |
| GAIF01012136.1 | 0      | 0      | 0      | 0      | 0      | 0.37   |
| GAIF01012140.1 | 57.1   | 36.94  | 68.58  | 51.21  | 29.22  | 31.46  |
| GAIF01012142.1 | 8.18   | 10.27  | 6.12   | 5.35   | 2.68   | 0.49   |
| GAIF01012144.1 | 0      | 0      | 0      | 0      | 0      | 0.14   |
| GAIF01012145.1 | 0.04   | 0      | 0.04   | 0.19   | 0.4    | 0.04   |
| GAIF01012146.1 | 700.15 | 634.08 | 892.01 | 362.4  | 236.56 | 217.34 |
| GAIF01012147.1 | 0      | 0.01   | 0      | 0      | 0.49   | 0.04   |
| GAIF01012148.1 | 0      | 0      | 0      | 0      | 0.03   | 0      |
| GAIF01012150.1 | 2.26   | 0.86   | 0.02   | 0.86   | 5.08   | 0.45   |
| GAIF01012152.1 | 17.24  | 13.27  | 8.01   | 2.77   | 1.12   | 0.44   |
| GAIF01012153.1 | 6.3    | 1.83   | 0.49   | 15.14  | 41.51  | 3.35   |
| GAIF01012154.1 | 0.11   | 0.11   | 0      | 1.58   | 7.58   | 2.08   |
| GAIF01012155.1 | 0      | 0.13   | 0.88   | 0      | 0.21   | 0.44   |

|                |        |        |        |       |        |       |
|----------------|--------|--------|--------|-------|--------|-------|
| GAIF01012159.1 | 7.53   | 4.48   | 4.03   | 16.51 | 24.02  | 2.88  |
| GAIF01012160.1 | 0.4    | 0      | 0      | 1.78  | 5.68   | 3.55  |
| GAIF01012162.1 | 104.33 | 337.28 | 326.06 | 16.46 | 38.03  | 23.44 |
| GAIF01012163.1 | 0      | 0.08   | 0      | 0     | 0      | 0     |
| GAIF01012165.1 | 0.21   | 0      | 0.02   | 0.21  | 0      | 0     |
| GAIF01012166.1 | 0.18   | 0      | 0      | 0     | 0.22   | 0     |
| GAIF01012168.1 | 0      | 0      | 0      | 0     | 0.89   | 0     |
| GAIF01012169.1 | 0      | 0      | 0      | 0     | 0.22   | 0     |
| GAIF01012170.1 | 7.34   | 3.51   | 2.98   | 5.56  | 6.28   | 0.24  |
| GAIF01012172.1 | 69.47  | 21.43  | 25.49  | 96.29 | 120.52 | 77.11 |
| GAIF01012173.1 | 0      | 0      | 0      | 0     | 0.33   | 0     |
| GAIF01012174.1 | 0.45   | 0.37   | 0      | 0.78  | 2.44   | 0     |
| GAIF01012175.1 | 0.12   | 0.4    | 0.13   | 2.98  | 13.66  | 0.13  |
| GAIF01012176.1 | 12.85  | 15.91  | 10.19  | 11.28 | 13.16  | 2.19  |
| GAIF01012177.1 | 0.58   | 0.06   | 0.34   | 0.1   | 0      | 0.28  |
| GAIF01012179.1 | 14.25  | 7.35   | 7.36   | 20.28 | 27.8   | 25.82 |
| GAIF01012180.1 | 52.86  | 44.53  | 56.73  | 56.35 | 31.07  | 45.64 |
| GAIF01012185.1 | 0.17   | 0      | 0      | 0     | 0      | 0     |
| GAIF01012188.1 | 1.01   | 1.08   | 1.51   | 1.16  | 0.7    | 0.26  |
| GAIF01012191.1 | 1.55   | 1.52   | 0.6    | 0.52  | 0      | 0.23  |
| GAIF01012192.1 | 6.05   | 5.02   | 2.17   | 1.5   | 1.39   | 0.27  |
| GAIF01012194.1 | 40.33  | 70.73  | 91.55  | 35.17 | 33.83  | 14.46 |
| GAIF01012196.1 | 1.37   | 1.49   | 0.98   | 6.5   | 6.16   | 0.2   |
| GAIF01012197.1 | 12.32  | 16.01  | 20.91  | 37.24 | 20.21  | 11.64 |
| GAIF01012198.1 | 8.61   | 10.31  | 2.83   | 30.42 | 47.48  | 1.51  |
| GAIF01012200.1 | 4.41   | 0.5    | 0.32   | 5.27  | 12.48  | 30.27 |
| GAIF01012203.1 | 0.41   | 0      | 0      | 0.19  | 0.89   | 0.09  |
| GAIF01012206.1 | 88.04  | 5.6    | 33.84  | 1.98  | 0.5    | 0.58  |
| GAIF01012207.1 | 0      | 0      | 0.6    | 0     | 0.39   | 0     |
| GAIF01012208.1 | 2.34   | 1.66   | 1.38   | 1.36  | 0.87   | 0.4   |
| GAIF01012210.1 | 0.36   | 0.13   | 0      | 0.46  | 2.88   | 0.48  |
| GAIF01012212.1 | 2.23   | 1.58   | 1.65   | 1.46  | 0.6    | 1.11  |
| GAIF01012215.1 | 4.23   | 3.15   | 1.11   | 24.13 | 40.47  | 0.68  |
| GAIF01012217.1 | 0      | 0      | 0      | 0     | 0.43   | 0     |
| GAIF01012218.1 | 0.5    | 1.28   | 0      | 0.19  | 1.01   | 0     |
| GAIF01012219.1 | 28.31  | 4.43   | 4.66   | 18.32 | 4.38   | 2.14  |
| GAIF01012220.1 | 0      | 0      | 0      | 0.01  | 0      | 0     |
| GAIF01012221.1 | 0.19   | 0.14   | 0.07   | 0     | 0      | 0     |
| GAIF01012222.1 | 0      | 0.12   | 0      | 0     | 0      | 0     |
| GAIF01012224.1 | 0.08   | 0      | 0      | 0     | 0      | 0     |
| GAIF01012225.1 | 14.21  | 17.74  | 8.9    | 30.4  | 25.68  | 2.62  |
| GAIF01012226.1 | 8.83   | 14.49  | 7.78   | 0     | 0      | 0.17  |
| GAIF01012227.1 | 1.82   | 0.38   | 0.22   | 0.68  | 1.88   | 0.47  |
| GAIF01012228.1 | 0.22   | 0      | 0      | 0.51  | 0.81   | 0     |

|                |         |         |        |         |         |        |
|----------------|---------|---------|--------|---------|---------|--------|
| GAIF01012231.1 | 0.09    | 0.1     | 0      | 0.94    | 2.5     | 0      |
| GAIF01012232.1 | 7.52    | 7.59    | 8.99   | 13.08   | 15.69   | 6.03   |
| GAIF01012233.1 | 17.98   | 18.35   | 19.74  | 15.93   | 27.21   | 15.91  |
| GAIF01012234.1 | 0       | 0       | 0.08   | 0.08    | 0.43    | 0.08   |
| GAIF01012238.1 | 31.36   | 27.65   | 53.23  | 81.82   | 46.54   | 88.23  |
| GAIF01012239.1 | 36.42   | 42.03   | 63.37  | 72.18   | 53.15   | 48.82  |
| GAIF01012240.1 | 0       | 0.03    | 0.03   | 0.07    | 0.04    | 0      |
| GAIF01012241.1 | 31.01   | 17.19   | 26.24  | 89.23   | 53.54   | 124.05 |
| GAIF01012242.1 | 0       | 0.06    | 0.02   | 0.64    | 2.02    | 0      |
| GAIF01012243.1 | 0       | 0       | 0      | 1.96    | 5.76    | 0      |
| GAIF01012245.1 | 0.24    | 0       | 0      | 0       | 6.97    | 0      |
| GAIF01012246.1 | 31.32   | 20.97   | 24.27  | 68.16   | 100.58  | 41.47  |
| GAIF01012247.1 | 33.93   | 87.42   | 30.48  | 49.95   | 49.24   | 9.81   |
| GAIF01012248.1 | 0.86    | 4.81    | 3.72   | 3.77    | 1.83    | 0.96   |
| GAIF01012250.1 | 0.6     | 0.57    | 0.59   | 0.65    | 0       | 0.03   |
| GAIF01012251.1 | 5.93    | 7.88    | 2.12   | 30.84   | 52.86   | 1.56   |
| GAIF01012252.1 | 0       | 0       | 0      | 0       | 0.05    | 0      |
| GAIF01012256.1 | 38.26   | 5.37    | 11.32  | 35.93   | 29.61   | 78.35  |
| GAIF01012257.1 | 0.36    | 0       | 0      | 0       | 0       | 0      |
| GAIF01012258.1 | 0       | 0.15    | 0      | 0       | 0.65    | 0.3    |
| GAIF01012259.1 | 0.95    | 0.69    | 1.17   | 1.18    | 0.15    | 0.63   |
| GAIF01012260.1 | 108.19  | 26.74   | 8.11   | 10.38   | 18.49   | 1.88   |
| GAIF01012261.1 | 1706.4  | 1125.81 | 709.01 | 1314.48 | 778.03  | 156.65 |
| GAIF01012262.1 | 15.12   | 14.27   | 14.2   | 21.08   | 15.33   | 5.45   |
| GAIF01012264.1 | 13.07   | 29.75   | 10.7   | 120.71  | 164.51  | 4.39   |
| GAIF01012265.1 | 0.44    | 0.38    | 0      | 0       | 0.26    | 0      |
| GAIF01012266.1 | 0       | 0       | 0      | 0       | 0       | 0.1    |
| GAIF01012268.1 | 14.61   | 9.54    | 4.44   | 39.4    | 38.54   | 2.7    |
| GAIF01012269.1 | 28.28   | 13.43   | 4.66   | 93.48   | 141.1   | 9      |
| GAIF01012274.1 | 1476.46 | 923.06  | 861.86 | 21.53   | 14.43   | 11.84  |
| GAIF01012275.1 | 18.14   | 27.75   | 34.72  | 41.56   | 26.48   | 13.34  |
| GAIF01012276.1 | 0       | 1.33    | 0.3    | 0       | 0       | 0      |
| GAIF01012277.1 | 0.75    | 0.21    | 0      | 8.51    | 17.61   | 0.43   |
| GAIF01012279.1 | 0.38    | 0.25    | 0.41   | 1.41    | 2.71    | 0.1    |
| GAIF01012280.1 | 1.01    | 0.85    | 0.25   | 7.65    | 28.35   | 0.12   |
| GAIF01012282.1 | 0       | 0       | 0      | 0       | 0.4     | 0      |
| GAIF01012284.1 | 0.31    | 0.72    | 0.05   | 1.95    | 1.17    | 0.1    |
| GAIF01012285.1 | 1.95    | 0       | 0      | 0.81    | 0.97    | 0.36   |
| GAIF01012287.1 | 1.54    | 1.83    | 0      | 7.64    | 19.71   | 2.01   |
| GAIF01012289.1 | 0       | 0       | 0      | 1.12    | 2.6     | 0      |
| GAIF01012290.1 | 0       | 0       | 0      | 0.04    | 0.05    | 0      |
| GAIF01012291.1 | 0.25    | 0.14    | 0.14   | 0       | 0       | 0      |
| GAIF01012292.1 | 256.03  | 622.29  | 280.06 | 208.37  | 1007.35 | 53.37  |
| GAIF01012295.1 | 40.77   | 22.92   | 28.37  | 60.57   | 43.29   | 44.27  |



|                |         |        |        |        |        |         |
|----------------|---------|--------|--------|--------|--------|---------|
| GAIF01012296.1 | 13.16   | 8.41   | 15.88  | 26.55  | 39.98  | 55.6    |
| GAIF01012297.1 | 226.8   | 107.95 | 68.98  | 120.75 | 81.95  | 64.33   |
| GAIF01012299.1 | 7.14    | 10.68  | 5.16   | 44.95  | 22.12  | 3.99    |
| GAIF01012300.1 | 0.14    | 0      | 0      | 0.74   | 1.38   | 0.66    |
| GAIF01012302.1 | 7.96    | 7.87   | 9.74   | 34.73  | 44.57  | 3.54    |
| GAIF01012304.1 | 0       | 0      | 0      | 2.51   | 9.87   | 0       |
| GAIF01012305.1 | 7.97    | 2.75   | 0.28   | 12.92  | 49.76  | 0.7     |
| GAIF01012307.1 | 1.46    | 0      | 0.27   | 3.11   | 15.07  | 1.29    |
| GAIF01012309.1 | 12.15   | 17.59  | 11.87  | 47.59  | 32.49  | 5.87    |
| GAIF01012311.1 | 0.04    | 0.23   | 0      | 0      | 0.05   | 0       |
| GAIF01012312.1 | 0       | 0      | 0      | 0      | 0.11   | 0       |
| GAIF01012313.1 | 0       | 0      | 0.19   | 0      | 0      | 0.08    |
| GAIF01012314.1 | 59.64   | 49.75  | 55.97  | 140.02 | 123.39 | 26.2    |
| GAIF01012315.1 | 0.18    | 0      | 1.31   | 0      | 0      | 0       |
| GAIF01012316.1 | 7.7     | 8.72   | 4.32   | 18.12  | 30.67  | 3.01    |
| GAIF01012317.1 | 1086.63 | 457.27 | 605.68 | 712.12 | 947.62 | 7085.11 |
| GAIF01012319.1 | 1.09    | 0.2    | 0      | 2.42   | 18.97  | 0.1     |
| GAIF01012320.1 | 0.32    | 0.33   | 0      | 0.36   | 0.12   | 0       |
| GAIF01012321.1 | 5.67    | 8.45   | 4.27   | 2.16   | 1.7    | 0.2     |
| GAIF01012322.1 | 7.71    | 11.67  | 14.78  | 14.93  | 12.65  | 6.7     |
| GAIF01012323.1 | 13.75   | 44.92  | 8.34   | 43.03  | 85.85  | 0.73    |
| GAIF01012324.1 | 69.58   | 43.1   | 10.35  | 203.29 | 282.82 | 22.81   |
| GAIF01012327.1 | 7.37    | 6.21   | 4.65   | 9.97   | 12.47  | 9.17    |
| GAIF01012328.1 | 0       | 0      | 0      | 0.14   | 1.41   | 0       |
| GAIF01012329.1 | 7.12    | 2.11   | 0      | 1.71   | 2.37   | 1.77    |
| GAIF01012330.1 | 16.24   | 10.57  | 5.78   | 41.44  | 63.69  | 2.99    |
| GAIF01012332.1 | 0       | 0      | 0      | 0      | 0      | 0.02    |
| GAIF01012333.1 | 4.11    | 1.94   | 4.91   | 1.14   | 0.98   | 2.46    |
| GAIF01012334.1 | 0.1     | 0.35   | 0.33   | 0.18   | 0.12   | 0       |
| GAIF01012336.1 | 0       | 0      | 0.12   | 0      | 0      | 0       |
| GAIF01012337.1 | 0.1     | 0      | 0.11   | 1.14   | 3.3    | 0       |
| GAIF01012339.1 | 0       | 0      | 0      | 0.55   | 0      | 0.29    |
| GAIF01012340.1 | 0       | 0.05   | 0      | 0      | 0      | 0       |
| GAIF01012341.1 | 0       | 0      | 0.23   | 0      | 0      | 0       |
| GAIF01012342.1 | 0       | 23.82  | 21.92  | 0      | 0.34   | 2.69    |
| GAIF01012343.1 | 24.16   | 11.51  | 14.8   | 49.27  | 78.72  | 26.05   |
| GAIF01012344.1 | 0       | 0.47   | 0.38   | 0.2    | 0.53   | 0.49    |
| GAIF01012345.1 | 0.53    | 1.16   | 1.1    | 1.2    | 1.22   | 0.17    |
| GAIF01012348.1 | 0       | 0      | 0.1    | 0      | 0      | 0.2     |
| GAIF01012349.1 | 0       | 0.08   | 0.15   | 0      | 0.5    | 0       |
| GAIF01012351.1 | 0       | 0      | 0.07   | 0.08   | 0      | 0       |
| GAIF01012353.1 | 0       | 0      | 0      | 0      | 0      | 0.06    |
| GAIF01012354.1 | 0       | 0      | 0.04   | 0      | 0      | 0       |
| GAIF01012355.1 | 4.95    | 10.08  | 9.59   | 23.89  | 22.19  | 6.62    |

|                |         |         |         |         |         |          |
|----------------|---------|---------|---------|---------|---------|----------|
| GAIF01012356.1 | 11.17   | 13.43   | 10.37   | 28.95   | 22.3    | 4.19     |
| GAIF01012357.1 | 0       | 0       | 0       | 0.07    | 0.28    | 0        |
| GAIF01012358.1 | 0.02    | 0       | 0       | 0       | 0.03    | 0        |
| GAIF01012359.1 | 0.47    | 0.06    | 0.13    | 3.4     | 12.54   | 0.65     |
| GAIF01012361.1 | 0       | 0.09    | 0       | 0       | 0.1     | 0        |
| GAIF01012362.1 | 0.11    | 0       | 0       | 4.73    | 18.3    | 0        |
| GAIF01012363.1 | 0       | 0.63    | 0.13    | 0       | 1.26    | 0        |
| GAIF01012365.1 | 0       | 0       | 0       | 0       | 0.18    | 0        |
| GAIF01012368.1 | 7.24    | 2.02    | 0       | 5.9     | 28.94   | 4.71     |
| GAIF01012369.1 | 0.15    | 0.15    | 0.12    | 1.12    | 4.21    | 0.47     |
| GAIF01012370.1 | 198     | 197.71  | 82.21   | 699.76  | 800.03  | 83.14    |
| GAIF01012371.1 | 5.12    | 4.33    | 6.72    | 13.38   | 13.35   | 5.96     |
| GAIF01012372.1 | 0.03    | 0       | 0       | 0.12    | 0.16    | 0        |
| GAIF01012373.1 | 6.13    | 7.46    | 7.19    | 30.49   | 34.16   | 4.13     |
| GAIF01012374.1 | 0.6     | 0       | 0       | 0.1     | 0.1     | 0        |
| GAIF01012375.1 | 0       | 0       | 0.05    | 0.4     | 1.01    | 0.11     |
| GAIF01012376.1 | 0       | 6.35    | 0       | 2.09    | 1.24    | 0        |
| GAIF01012377.1 | 156.17  | 25.95   | 2.09    | 47.09   | 53.95   | 0        |
| GAIF01012380.1 | 0       | 0.01    | 0       | 0.01    | 0       | 0        |
| GAIF01012383.1 | 40.83   | 22.71   | 24.46   | 37.91   | 65.26   | 39.38    |
| GAIF01012384.1 | 0.11    | 0.24    | 0.48    | 0.77    | 0.15    | 0.12     |
| GAIF01012385.1 | 4460.22 | 2535.84 | 4106.12 | 3328.01 | 1958.73 | 10845.81 |
| GAIF01012387.1 | 17.91   | 26.64   | 4.04    | 22.9    | 52.84   | 13.72    |
| GAIF01012389.1 | 0       | 0       | 0       | 0       | 0       | 0.12     |
| GAIF01012390.1 | 0       | 0       | 0       | 0.19    | 0.12    | 0        |
| GAIF01012391.1 | 32.53   | 28.96   | 12.98   | 40.98   | 36.51   | 36       |
| GAIF01012392.1 | 0.78    | 0.34    | 1.54    | 1.45    | 0.19    | 0.34     |
| GAIF01012393.1 | 0       | 0.05    | 0       | 0       | 0       | 0        |
| GAIF01012394.1 | 0       | 0       | 0.06    | 0       | 0       | 0        |
| GAIF01012396.1 | 0       | 0.43    | 0.18    | 0.06    | 0       | 0.06     |
| GAIF01012397.1 | 0       | 0       | 0.08    | 0.09    | 0       | 0        |
| GAIF01012398.1 | 7.01    | 11.92   | 19.06   | 2.22    | 1.24    | 26.42    |
| GAIF01012399.1 | 2.01    | 2.73    | 1.55    | 5.37    | 11.49   | 4.99     |
| GAIF01012400.1 | 342.21  | 163.27  | 85.72   | 65.76   | 46.9    | 20       |
| GAIF01012401.1 | 0       | 0.16    | 0       | 0       | 0.09    | 0        |
| GAIF01012402.1 | 0.57    | 0.31    | 0.04    | 0.05    | 0.16    | 0        |
| GAIF01012404.1 | 0       | 0       | 0       | 0       | 0       | 0.31     |
| GAIF01012405.1 | 9.66    | 11.13   | 7.78    | 16.83   | 18.06   | 2.89     |
| GAIF01012406.1 | 0       | 2.74    | 1.2     | 0       | 0       | 0.37     |
| GAIF01012409.1 | 0.13    | 0.03    | 0.03    | 0.18    | 1.38    | 0.14     |
| GAIF01012410.1 | 0       | 0       | 0       | 0       | 0.05    | 0        |
| GAIF01012412.1 | 0.42    | 0.68    | 0.46    | 0.24    | 1.25    | 0        |
| GAIF01012415.1 | 0       | 0       | 0.05    | 0.09    | 0.07    | 0        |
| GAIF01012416.1 | 8.98    | 9.97    | 1.48    | 12.42   | 13.21   | 7.89     |

|                |       |       |       |       |       |       |
|----------------|-------|-------|-------|-------|-------|-------|
| GAIF01012418.1 | 0     | 0     | 0     | 0.05  | 0.44  | 0     |
| GAIF01012420.1 | 7.94  | 7.75  | 9.45  | 20.2  | 23.92 | 6.66  |
| GAIF01012421.1 | 0     | 0.13  | 0     | 0     | 0     | 0.65  |
| GAIF01012425.1 | 0     | 0     | 0     | 0     | 0.1   | 0     |
| GAIF01012426.1 | 0     | 0     | 0     | 0.63  | 0.16  | 0.15  |
| GAIF01012428.1 | 1.87  | 1.76  | 0.75  | 0.69  | 1.02  | 0     |
| GAIF01012431.1 | 0     | 0     | 0     | 0     | 0.25  | 0     |
| GAIF01012432.1 | 0.45  | 0.28  | 0.04  | 4.71  | 15.06 | 0.42  |
| GAIF01012433.1 | 4.48  | 2.55  | 7.73  | 1.24  | 0.38  | 2.7   |
| GAIF01012435.1 | 0.54  | 0.24  | 0     | 0     | 0.07  | 0.4   |
| GAIF01012436.1 | 0.36  | 0     | 0     | 0.93  | 5.05  | 0.39  |
| GAIF01012437.1 | 0     | 0     | 0.11  | 0.12  | 0.44  | 0     |
| GAIF01012438.1 | 1.31  | 0.28  | 0.18  | 4.53  | 11.63 | 17.08 |
| GAIF01012439.1 | 0.25  | 0.69  | 0.21  | 0.22  | 0.08  | 1.47  |
| GAIF01012440.1 | 4.96  | 1.26  | 0.12  | 0.74  | 1.27  | 0     |
| GAIF01012442.1 | 0.26  | 0     | 0     | 0     | 0     | 0     |
| GAIF01012443.1 | 6.35  | 6.34  | 4.18  | 22.58 | 23.59 | 4.18  |
| GAIF01012445.1 | 0.13  | 0.36  | 0.29  | 4.12  | 0     | 0.07  |
| GAIF01012446.1 | 0.1   | 0.14  | 0     | 0.93  | 0.55  | 0.22  |
| GAIF01012447.1 | 0.13  | 0     | 0     | 0.39  | 0     | 0.13  |
| GAIF01012450.1 | 0.99  | 1.08  | 0.57  | 0.88  | 0.9   | 0.6   |
| GAIF01012451.1 | 10.23 | 9.72  | 10.21 | 32.72 | 38.87 | 7.36  |
| GAIF01012452.1 | 0.11  | 0     | 0     | 0     | 0     | 0     |
| GAIF01012453.1 | 0     | 0     | 0.22  | 0.63  | 2.94  | 0     |
| GAIF01012454.1 | 24.07 | 43.46 | 18.48 | 56.63 | 64.73 | 5.93  |
| GAIF01012456.1 | 0.38  | 0.1   | 0     | 0     | 0.22  | 0     |
| GAIF01012457.1 | 0     | 0     | 0     | 0.16  | 0     | 0     |
| GAIF01012458.1 | 15.92 | 10.95 | 9.14  | 18.35 | 29.5  | 14.64 |
| GAIF01012459.1 | 19.85 | 10.65 | 20.02 | 61.74 | 54.5  | 18.81 |
| GAIF01012461.1 | 1.51  | 0.28  | 0.7   | 0.89  | 1.54  | 5.2   |
| GAIF01012462.1 | 0     | 0.07  | 0     | 0     | 0.08  | 0     |
| GAIF01012464.1 | 0.1   | 0     | 0     | 0.17  | 0.12  | 0     |
| GAIF01012465.1 | 0.92  | 0.57  | 0.4   | 5.56  | 17.34 | 0.43  |
| GAIF01012466.1 | 0.1   | 0     | 0     | 0     | 0     | 0.05  |
| GAIF01012467.1 | 0     | 0.03  | 0     | 0.03  | 0.04  | 0     |
| GAIF01012468.1 | 5.08  | 2.98  | 3     | 0.76  | 0.47  | 0.14  |
| GAIF01012469.1 | 0.74  | 0.41  | 0.31  | 3.99  | 0.8   | 0.1   |
| GAIF01012470.1 | 0     | 0.4   | 0     | 1.23  | 1.19  | 0.04  |
| GAIF01012472.1 | 0.02  | 0.05  | 0.03  | 0.06  | 0.39  | 0.01  |
| GAIF01012473.1 | 14.51 | 8.49  | 8.58  | 19.43 | 9.39  | 24.6  |
| GAIF01012474.1 | 0     | 0     | 0.07  | 0     | 0.42  | 0     |
| GAIF01012477.1 | 0.19  | 0.14  | 0     | 0     | 0.08  | 0     |
| GAIF01012478.1 | 0.08  | 0.27  | 0.09  | 0.1   | 0.79  | 0.18  |
| GAIF01012479.1 | 1.65  | 1.96  | 3.19  | 69.02 | 46.14 | 304.7 |

|                |        |        |       |        |        |        |
|----------------|--------|--------|-------|--------|--------|--------|
| GAIF01012481.1 | 2.31   | 0.42   | 0.22  | 12.41  | 45.36  | 0.98   |
| GAIF01012482.1 | 0      | 0      | 0     | 0.27   | 0.87   | 0      |
| GAIF01012483.1 | 0      | 0      | 0.06  | 0      | 0      | 0      |
| GAIF01012484.1 | 0.46   | 0.2    | 0     | 0      | 0      | 0.31   |
| GAIF01012485.1 | 37.79  | 55.31  | 92.93 | 40.68  | 36.77  | 40.22  |
| GAIF01012486.1 | 0      | 0      | 0.32  | 0      | 0      | 0      |
| GAIF01012488.1 | 0.51   | 0.18   | 0.37  | 0.29   | 0.51   | 0      |
| GAIF01012490.1 | 0      | 0.24   | 0     | 0      | 0      | 0      |
| GAIF01012491.1 | 1.08   | 0.35   | 0.53  | 0.18   | 0.75   | 0.23   |
| GAIF01012492.1 | 0      | 0.08   | 0.2   | 0      | 0.04   | 0.4    |
| GAIF01012493.1 | 0.12   | 0      | 0     | 6.7    | 4.49   | 2.95   |
| GAIF01012494.1 | 18.17  | 19.64  | 28.7  | 30.71  | 21.97  | 12.84  |
| GAIF01012496.1 | 17.11  | 13.48  | 10.26 | 47.04  | 63.75  | 3.22   |
| GAIF01012498.1 | 19.64  | 6.16   | 5.58  | 39.79  | 68.97  | 171.59 |
| GAIF01012499.1 | 0.08   | 0      | 0     | 0.06   | 0.27   | 0      |
| GAIF01012500.1 | 19.5   | 15.72  | 10.55 | 42.82  | 27.56  | 7.55   |
| GAIF01012502.1 | 7.61   | 16.29  | 3.46  | 19.82  | 17.84  | 0.21   |
| GAIF01012506.1 | 0      | 0      | 0     | 0.06   | 0.26   | 0      |
| GAIF01012507.1 | 28.67  | 20.84  | 35.01 | 69.27  | 53.66  | 88.19  |
| GAIF01012509.1 | 0      | 0      | 0     | 0.18   | 0.57   | 0      |
| GAIF01012510.1 | 0      | 0.14   | 0     | 0      | 0      | 0      |
| GAIF01012512.1 | 10.2   | 16.17  | 10.37 | 39.47  | 43.39  | 4.15   |
| GAIF01012513.1 | 0.19   | 0.19   | 0     | 0      | 0      | 0      |
| GAIF01012514.1 | 0.09   | 0      | 0.36  | 0.11   | 0.5    | 0      |
| GAIF01012515.1 | 11.36  | 7.28   | 21.16 | 28.73  | 31.72  | 14.09  |
| GAIF01012517.1 | 210.82 | 159.08 | 79.6  | 208.85 | 181.61 | 30.7   |
| GAIF01012518.1 | 0.26   | 0      | 0     | 0      | 0      | 0      |
| GAIF01012521.1 | 15.6   | 9      | 3.98  | 19.28  | 16.74  | 0.73   |
| GAIF01012522.1 | 6.92   | 6.88   | 4.04  | 8.43   | 9.75   | 0      |
| GAIF01012523.1 | 157.12 | 157.3  | 164.3 | 97.33  | 105.03 | 463.02 |
| GAIF01012524.1 | 4.78   | 1.02   | 0.24  | 2.04   | 2.47   | 1.2    |
| GAIF01012525.1 | 0.14   | 0      | 0     | 0      | 0.16   | 0.45   |
| GAIF01012527.1 | 0.39   | 0.31   | 0.15  | 0.74   | 0.68   | 0      |
| GAIF01012528.1 | 0      | 0      | 0     | 0.11   | 0      | 0      |
| GAIF01012529.1 | 0      | 0      | 0     | 0      | 0.1    | 0      |
| GAIF01012530.1 | 0.03   | 0.04   | 0     | 0      | 0.13   | 0      |
| GAIF01012532.1 | 0.59   | 0.85   | 0.65  | 0      | 0.19   | 0      |
| GAIF01012533.1 | 0.14   | 1.46   | 0     | 1.37   | 5.72   | 0.17   |
| GAIF01012536.1 | 0.05   | 0      | 0.05  | 0.05   | 0.11   | 0.05   |
| GAIF01012537.1 | 2.57   | 2.8    | 0.26  | 10.99  | 24.47  | 1.55   |
| GAIF01012538.1 | 0      | 0.05   | 0.02  | 0      | 0.17   | 0.16   |
| GAIF01012539.1 | 61.27  | 39.46  | 16.28 | 14.9   | 19.02  | 16.55  |
| GAIF01012540.1 | 0      | 0.05   | 0.26  | 0.01   | 0.03   | 0.13   |
| GAIF01012541.1 | 15     | 19.29  | 13.34 | 39.83  | 33.66  | 4.21   |

|                |        |        |       |         |         |        |
|----------------|--------|--------|-------|---------|---------|--------|
| GAIF01012542.1 | 0.21   | 0      | 0     | 0.12    | 0.51    | 0      |
| GAIF01012545.1 | 0.27   | 0.15   | 0.3   | 1.35    | 1.81    | 0.98   |
| GAIF01012548.1 | 0.24   | 0.17   | 0.35  | 1.46    | 10.21   | 0.09   |
| GAIF01012549.1 | 0      | 0      | 0     | 0       | 2.19    | 0      |
| GAIF01012551.1 | 0.29   | 0      | 0     | 0.68    | 1.16    | 0      |
| GAIF01012552.1 | 0      | 0      | 0     | 0       | 0       | 0.12   |
| GAIF01012554.1 | 0      | 0      | 0     | 0.14    | 0       | 0      |
| GAIF01012555.1 | 0      | 0.37   | 0     | 0       | 0.56    | 0      |
| GAIF01012556.1 | 0.19   | 0.07   | 0.16  | 2.3     | 9.87    | 0      |
| GAIF01012557.1 | 4.86   | 0      | 0.43  | 7.45    | 2.81    | 18.66  |
| GAIF01012558.1 | 0.09   | 0      | 0.05  | 0       | 0.17    | 0      |
| GAIF01012559.1 | 0      | 0      | 0.09  | 0.09    | 0       | 0      |
| GAIF01012560.1 | 0.15   | 0.07   | 0     | 0       | 0       | 0      |
| GAIF01012561.1 | 0      | 0      | 0     | 0.1     | 0       | 0      |
| GAIF01012562.1 | 0      | 0.15   | 0     | 1.4     | 4.68    | 0.15   |
| GAIF01012565.1 | 17.07  | 12.9   | 11.78 | 7.32    | 6.28    | 8.61   |
| GAIF01012567.1 | 0      | 0      | 0.17  | 0       | 0.09    | 0      |
| GAIF01012569.1 | 14.92  | 36.69  | 17.72 | 45.97   | 31.17   | 5.39   |
| GAIF01012570.1 | 3.86   | 2.86   | 3.58  | 3.06    | 1.46    | 1.41   |
| GAIF01012571.1 | 6.24   | 0      | 0     | 4.06    | 0       | 0.11   |
| GAIF01012572.1 | 2.11   | 1.45   | 0.49  | 6.39    | 23.82   | 1.66   |
| GAIF01012573.1 | 0.79   | 1.3    | 0.87  | 9.22    | 5.73    | 6.57   |
| GAIF01012574.1 | 0.09   | 0.14   | 0.09  | 0.45    | 0.31    | 0      |
| GAIF01012575.1 | 0      | 0.47   | 0.05  | 0       | 1.12    | 0.16   |
| GAIF01012577.1 | 24.83  | 12.01  | 10.47 | 36.09   | 49.13   | 23.22  |
| GAIF01012578.1 | 0      | 0      | 0     | 0       | 0.36    | 0      |
| GAIF01012579.1 | 0      | 0      | 0     | 0       | 0.11    | 0      |
| GAIF01012581.1 | 0      | 0      | 0     | 0.01    | 0       | 0      |
| GAIF01012582.1 | 0.77   | 0.28   | 0.14  | 0.15    | 0       | 0.43   |
| GAIF01012584.1 | 0      | 0      | 0     | 0.16    | 0.31    | 0      |
| GAIF01012586.1 | 7.42   | 7.72   | 9.2   | 20.05   | 16.24   | 6.7    |
| GAIF01012587.1 | 0      | 0.04   | 0     | 0       | 0       | 0      |
| GAIF01012589.1 | 10.41  | 17.15  | 27.23 | 44.79   | 32.41   | 11.64  |
| GAIF01012590.1 | 211.85 | 128.88 | 22.66 | 4328.54 | 3689.93 | 6.61   |
| GAIF01012591.1 | 0.32   | 0.35   | 0.71  | 0.94    | 7.56    | 1.07   |
| GAIF01012593.1 | 0.68   | 1.28   | 0.15  | 0.63    | 1.85    | 0.15   |
| GAIF01012594.1 | 0.47   | 0.64   | 0.13  | 0.27    | 0.14    | 0      |
| GAIF01012595.1 | 0.15   | 0      | 0     | 0       | 0.18    | 0      |
| GAIF01012596.1 | 1.26   | 0.34   | 0.09  | 3.02    | 13.71   | 1.39   |
| GAIF01012597.1 | 42.15  | 24.43  | 19.49 | 62.02   | 121.36  | 175.28 |
| GAIF01012599.1 | 7.41   | 6.25   | 3.61  | 15.61   | 19.46   | 3.36   |
| GAIF01012600.1 | 0.12   | 0      | 0     | 0.44    | 2.29    | 0.21   |
| GAIF01012602.1 | 0.22   | 0.32   | 0.32  | 0.39    | 0.5     | 0      |
| GAIF01012603.1 | 32.13  | 38.84  | 19.57 | 31.36   | 18.3    | 0.01   |

|                |        |        |        |        |        |        |
|----------------|--------|--------|--------|--------|--------|--------|
| GAIF01012604.1 | 6.01   | 2.75   | 2.86   | 2.02   | 2.47   | 2.18   |
| GAIF01012605.1 | 9.25   | 8.46   | 5.15   | 24.67  | 1.54   | 1.35   |
| GAIF01012606.1 | 111.58 | 188.94 | 109.69 | 302.32 | 261.36 | 62.81  |
| GAIF01012607.1 | 0      | 0      | 0      | 0      | 0.11   | 0      |
| GAIF01012608.1 | 0      | 0      | 4.16   | 1.45   | 0      | 0.42   |
| GAIF01012610.1 | 24.2   | 2.68   | 3.05   | 17.2   | 5.91   | 4.52   |
| GAIF01012612.1 | 0      | 0      | 0      | 0      | 0.1    | 0      |
| GAIF01012613.1 | 0.68   | 0.38   | 0.11   | 0.83   | 0.98   | 0.26   |
| GAIF01012614.1 | 0.46   | 1      | 0      | 0.35   | 0.3    | 0.21   |
| GAIF01012615.1 | 0      | 0      | 0      | 0.27   | 1.02   | 0      |
| GAIF01012616.1 | 0.05   | 0      | 1.78   | 0.68   | 0      | 0      |
| GAIF01012617.1 | 0.35   | 0.46   | 0.08   | 0.73   | 1.1    | 0.04   |
| GAIF01012619.1 | 0.18   | 0.19   | 0      | 1.63   | 6.43   | 1.16   |
| GAIF01012621.1 | 28.07  | 17.79  | 11.37  | 45.52  | 46.41  | 10.01  |
| GAIF01012622.1 | 0      | 0      | 0      | 0      | 0.13   | 0      |
| GAIF01012625.1 | 130.34 | 60.02  | 99.71  | 99.63  | 51.93  | 69.75  |
| GAIF01012626.1 | 5.11   | 5.12   | 0.51   | 32.34  | 50.27  | 0.29   |
| GAIF01012627.1 | 0      | 0      | 0      | 0.11   | 0      | 0      |
| GAIF01012629.1 | 54.78  | 22.51  | 38.22  | 46.04  | 54.36  | 187.04 |
| GAIF01012631.1 | 2.79   | 5.47   | 3.27   | 1.73   | 0.67   | 0      |
| GAIF01012632.1 | 16.03  | 30.31  | 17.47  | 6.07   | 6.01   | 2.05   |
| GAIF01012633.1 | 0.45   | 0      | 0      | 0.78   | 4.61   | 0.17   |
| GAIF01012635.1 | 0      | 0      | 0      | 0.29   | 0.91   | 0      |
| GAIF01012636.1 | 5.58   | 4.41   | 4.35   | 14.21  | 10.61  | 3.18   |
| GAIF01012637.1 | 7.76   | 7.62   | 6.39   | 14.35  | 6.83   | 0.68   |
| GAIF01012638.1 | 17.64  | 19.96  | 18.36  | 120.1  | 147.64 | 11.8   |
| GAIF01012640.1 | 13.43  | 17.03  | 8.32   | 68.39  | 58.74  | 3.36   |
| GAIF01012641.1 | 16.06  | 27.82  | 25.03  | 44.28  | 37.23  | 8.94   |
| GAIF01012643.1 | 6.81   | 12.46  | 6.41   | 1.56   | 0.63   | 0.25   |
| GAIF01012644.1 | 3.37   | 1.52   | 2.8    | 4.97   | 9.7    | 1.81   |
| GAIF01012645.1 | 14.3   | 20.74  | 15.7   | 0      | 11.47  | 15.76  |
| GAIF01012646.1 | 2.42   | 0.13   | 0.09   | 6.79   | 4.9    | 0.16   |
| GAIF01012647.1 | 18.1   | 26.86  | 19.77  | 31.57  | 38.39  | 13.94  |
| GAIF01012650.1 | 49.96  | 52.81  | 33.6   | 53.76  | 66.97  | 55.25  |
| GAIF01012651.1 | 0.39   | 0.68   | 0.61   | 2.41   | 3.24   | 1.54   |
| GAIF01012652.1 | 0.33   | 1.77   | 0.67   | 1.05   | 1.5    | 0.37   |
| GAIF01012653.1 | 0.13   | 0      | 0.68   | 0.78   | 0.06   | 1.33   |
| GAIF01012654.1 | 0.27   | 0      | 0      | 2.44   | 12.14  | 0.13   |
| GAIF01012655.1 | 0.04   | 0.02   | 0      | 0.08   | 0.23   | 0      |
| GAIF01012656.1 | 0      | 0.14   | 0      | 0      | 0      | 0      |
| GAIF01012658.1 | 110.69 | 107.58 | 57.69  | 321.57 | 168.45 | 52.67  |
| GAIF01012659.1 | 61.1   | 28.78  | 29.73  | 70.78  | 108.6  | 164.87 |
| GAIF01012663.1 | 0      | 0.12   | 0.12   | 0      | 0      | 0      |
| GAIF01012665.1 | 13.66  | 12.43  | 22.01  | 24.99  | 23.57  | 45.08  |

|                |         |         |         |         |        |         |
|----------------|---------|---------|---------|---------|--------|---------|
| GAIF01012666.1 | 0       | 0.06    | 0.06    | 0.3     | 2.35   | 0.6     |
| GAIF01012667.1 | 0       | 0       | 0       | 0       | 0.32   | 0.2     |
| GAIF01012668.1 | 0       | 0       | 0       | 0.18    | 0.38   | 0       |
| GAIF01012669.1 | 63.56   | 93.78   | 82.09   | 30.03   | 32.79  | 33.2    |
| GAIF01012670.1 | 0.45    | 0       | 0       | 2.62    | 6.42   | 1       |
| GAIF01012672.1 | 0.22    | 0       | 0.08    | 0       | 0      | 0.18    |
| GAIF01012673.1 | 0       | 0       | 0       | 0       | 0.19   | 0.03    |
| GAIF01012675.1 | 1852.86 | 1288.55 | 2450.05 | 1016.25 | 469.87 | 1454.78 |
| GAIF01012676.1 | 0.3     | 0.8     | 0.09    | 3.85    | 16.38  | 0.05    |
| GAIF01012677.1 | 8.33    | 7.87    | 12.35   | 5.93    | 6.55   | 5.89    |
| GAIF01012678.1 | 0.46    | 1.44    | 1.58    | 2.27    | 2.21   | 0.32    |
| GAIF01012679.1 | 5.93    | 6.62    | 2.41    | 17.05   | 44.86  | 0.41    |
| GAIF01012680.1 | 0       | 0.08    | 0.03    | 0.2     | 0      | 0.05    |
| GAIF01012681.1 | 0       | 0.05    | 0.05    | 0       | 0.13   | 0       |
| GAIF01012682.1 | 0       | 0       | 0.06    | 0       | 0      | 0       |
| GAIF01012684.1 | 27.53   | 8.83    | 0       | 11.09   | 30.69  | 38.93   |
| GAIF01012685.1 | 0       | 0       | 0       | 0.38    | 1.48   | 0       |
| GAIF01012686.1 | 0       | 0       | 0       | 0.06    | 0.07   | 0       |
| GAIF01012688.1 | 0.06    | 0       | 0.07    | 0.29    | 0.23   | 0.21    |
| GAIF01012690.1 | 0       | 0       | 0       | 0.06    | 0      | 0       |
| GAIF01012692.1 | 0       | 0       | 0       | 0.13    | 0.57   | 0.12    |
| GAIF01012693.1 | 1.19    | 0.91    | 0.13    | 11.22   | 22.53  | 0       |
| GAIF01012694.1 | 14.56   | 10.51   | 7.99    | 5.93    | 1.42   | 0       |
| GAIF01012695.1 | 19.35   | 6.82    | 2.82    | 37.42   | 41.2   | 82.78   |
| GAIF01012696.1 | 1.1     | 0.24    | 1.62    | 1.14    | 0.13   | 0.66    |
| GAIF01012697.1 | 5.03    | 1.5     | 0.64    | 11.27   | 16.52  | 5.81    |
| GAIF01012698.1 | 0.25    | 0.33    | 0.07    | 0.48    | 1.67   | 0.27    |
| GAIF01012700.1 | 0       | 0       | 0       | 0.42    | 0.66   | 0       |
| GAIF01012701.1 | 0.69    | 0.59    | 1.46    | 1.55    | 2.68   | 0.21    |
| GAIF01012703.1 | 0.35    | 0       | 0.05    | 1.46    | 7.45   | 0.1     |
| GAIF01012705.1 | 25.38   | 15.75   | 20.41   | 49.61   | 66.33  | 23.11   |
| GAIF01012706.1 | 0.11    | 0.12    | 0       | 0.26    | 0.49   | 0.06    |
| GAIF01012707.1 | 0       | 0       | 0       | 0       | 0.05   | 0       |
| GAIF01012708.1 | 0.37    | 0.85    | 0.57    | 0.93    | 0.9    | 0.14    |
| GAIF01012709.1 | 0.1     | 0       | 0       | 0       | 0      | 0       |
| GAIF01012710.1 | 0.12    | 0.39    | 0.2     | 0       | 0.11   | 0.2     |
| GAIF01012711.1 | 0       | 0.06    | 0       | 0       | 0.13   | 0       |
| GAIF01012712.1 | 0       | 0.17    | 0       | 0.73    | 3.47   | 0       |
| GAIF01012714.1 | 1.15    | 2.29    | 0.37    | 15.81   | 29.42  | 0.05    |
| GAIF01012716.1 | 5.14    | 0.52    | 0       | 5.88    | 17.46  | 2       |
| GAIF01012718.1 | 0       | 0       | 0       | 0.69    | 0      | 0.14    |
| GAIF01012719.1 | 0       | 0       | 0.16    | 0       | 0      | 0       |
| GAIF01012721.1 | 0       | 0       | 0       | 0       | 0.1    | 0       |
| GAIF01012722.1 | 0.43    | 0       | 0       | 1.93    | 7.84   | 0.96    |

|                |         |        |         |        |        |         |
|----------------|---------|--------|---------|--------|--------|---------|
| GAIF01012724.1 | 7.95    | 3.4    | 2       | 2.12   | 1.25   | 1.01    |
| GAIF01012725.1 | 0.07    | 0      | 0       | 0      | 0      | 0       |
| GAIF01012726.1 | 19.03   | 36.66  | 42.43   | 49.39  | 45.35  | 16.19   |
| GAIF01012727.1 | 0.46    | 0.1    | 0.1     | 2.64   | 11.41  | 0.51    |
| GAIF01012729.1 | 28.28   | 38.82  | 54.17   | 112.43 | 42.93  | 18.13   |
| GAIF01012730.1 | 0.14    | 0      | 0       | 0.06   | 0.56   | 0.06    |
| GAIF01012732.1 | 10.4    | 8.97   | 6.98    | 38.69  | 30.7   | 3.33    |
| GAIF01012733.1 | 11.6    | 14.27  | 7.17    | 10.3   | 2.63   | 2.45    |
| GAIF01012734.1 | 0       | 0      | 0       | 0.17   | 0.18   | 0       |
| GAIF01012735.1 | 0.92    | 0      | 0       | 4.82   | 12     | 4.17    |
| GAIF01012737.1 | 0.09    | 0.1    | 0       | 0.08   | 0      | 0.04    |
| GAIF01012738.1 | 0.24    | 0      | 0       | 0      | 0.23   | 0.03    |
| GAIF01012740.1 | 0       | 0      | 0       | 0.14   | 0      | 0       |
| GAIF01012741.1 | 0.02    | 0      | 0       | 0      | 0.32   | 0       |
| GAIF01012742.1 | 0.13    | 0.29   | 0       | 3.09   | 16.79  | 0.44    |
| GAIF01012743.1 | 0       | 0.05   | 0.01    | 0.03   | 0      | 0.03    |
| GAIF01012744.1 | 0       | 0      | 0       | 0      | 0.01   | 0       |
| GAIF01012746.1 | 0       | 0.04   | 0       | 0.04   | 0      | 0       |
| GAIF01012747.1 | 0.44    | 0.2    | 0.22    | 0.43   | 2.75   | 0.04    |
| GAIF01012748.1 | 0.05    | 0      | 0.08    | 0      | 0      | 0       |
| GAIF01012749.1 | 0.12    | 0      | 0       | 0.48   | 2.17   | 0       |
| GAIF01012750.1 | 32.99   | 23.45  | 15.81   | 58.39  | 60.98  | 22.11   |
| GAIF01012751.1 | 1.9     | 2.46   | 1.59    | 0.53   | 0.11   | 0.1     |
| GAIF01012752.1 | 11.14   | 11.76  | 6.71    | 40.13  | 40.53  | 2.52    |
| GAIF01012754.1 | 128.21  | 161.52 | 150.13  | 146.74 | 59.12  | 26.62   |
| GAIF01012756.1 | 0       | 0.06   | 0       | 0      | 0      | 0       |
| GAIF01012757.1 | 1185.89 | 748.31 | 1677.22 | 516.41 | 135.04 | 1072.25 |
| GAIF01012759.1 | 13.39   | 16.91  | 9.28    | 84.66  | 68.89  | 5.14    |
| GAIF01012760.1 | 0       | 0      | 0       | 0      | 0      | 0.14    |
| GAIF01012761.1 | 0       | 0.17   | 0       | 0.62   | 3.27   | 0       |
| GAIF01012762.1 | 17.65   | 16.13  | 19.09   | 42.7   | 16.98  | 33.42   |
| GAIF01012763.1 | 0.1     | 0.03   | 0       | 0.15   | 0.24   | 0       |
| GAIF01012766.1 | 8.07    | 15.73  | 2.45    | 27.2   | 22.86  | 1       |
| GAIF01012767.1 | 111.91  | 116.5  | 124.13  | 112.53 | 83.1   | 84.25   |
| GAIF01012769.1 | 0.3     | 0.29   | 0.08    | 0.61   | 0.59   | 0.25    |
| GAIF01012770.1 | 0.08    | 0.08   | 0.31    | 0.25   | 0.27   | 0       |
| GAIF01012772.1 | 0.06    | 0.35   | 0.21    | 0.31   | 0.23   | 0.11    |
| GAIF01012773.1 | 0.04    | 0.05   | 0.05    | 0.1    | 0.36   | 0       |
| GAIF01012774.1 | 0       | 0      | 0       | 0.05   | 0      | 0       |
| GAIF01012775.1 | 12.1    | 53.41  | 28.23   | 43.8   | 58.35  | 14.21   |
| GAIF01012776.1 | 3.27    | 1.93   | 1.51    | 0.87   | 0.93   | 0.05    |
| GAIF01012777.1 | 0.34    | 0.12   | 0.03    | 3.4    | 8.17   | 0.06    |
| GAIF01012778.1 | 0.1     | 0.22   | 0.11    | 0      | 0      | 0       |
| GAIF01012779.1 | 0       | 0.52   | 0.6     | 0      | 0      | 0       |



|                |         |        |        |         |         |        |
|----------------|---------|--------|--------|---------|---------|--------|
| GAIF01012780.1 | 0.2     | 0.12   | 0      | 1.66    | 7.78    | 0.22   |
| GAIF01012781.1 | 0.64    | 0.19   | 0.27   | 1.95    | 5.07    | 0.47   |
| GAIF01012783.1 | 18.51   | 17.06  | 5.01   | 13.74   | 13.15   | 0.45   |
| GAIF01012785.1 | 0       | 0      | 0      | 0.04    | 0.36    | 0      |
| GAIF01012786.1 | 0       | 0      | 0      | 0       | 0.45    | 0      |
| GAIF01012787.1 | 0       | 0.43   | 0      | 0.28    | 0.1     | 0      |
| GAIF01012788.1 | 0.07    | 0.02   | 0      | 0       | 0       | 0      |
| GAIF01012790.1 | 2.35    | 1.05   | 0.53   | 9.61    | 39.56   | 0.32   |
| GAIF01012792.1 | 12.55   | 4.39   | 8.22   | 7.96    | 5.44    | 14.74  |
| GAIF01012793.1 | 1.35    | 0.54   | 0.11   | 3.43    | 5.91    | 0.17   |
| GAIF01012794.1 | 0.15    | 0      | 0      | 0.43    | 2.7     | 0.04   |
| GAIF01012795.1 | 3.18    | 0.16   | 0      | 13.33   | 32.47   | 1.19   |
| GAIF01012796.1 | 19.68   | 39.68  | 1.88   | 9.82    | 30.13   | 0.76   |
| GAIF01012797.1 | 22.87   | 24.6   | 13.17  | 67.82   | 44.59   | 4.08   |
| GAIF01012799.1 | 0.23    | 0.06   | 0      | 0.16    | 2.19    | 0      |
| GAIF01012800.1 | 0.19    | 0.07   | 0.06   | 0.39    | 0.99    | 0.28   |
| GAIF01012802.1 | 10.34   | 14.61  | 12.17  | 23.61   | 18.01   | 5.69   |
| GAIF01012803.1 | 0.9     | 0.49   | 0      | 1.74    | 3.79    | 0.17   |
| GAIF01012806.1 | 1.47    | 1.4    | 2.43   | 0       | 0       | 0.1    |
| GAIF01012808.1 | 0.28    | 0      | 0      | 0.31    | 0.65    | 0.09   |
| GAIF01012809.1 | 0.09    | 0      | 0      | 0.44    | 0.11    | 0      |
| GAIF01012810.1 | 79.72   | 44.81  | 27.96  | 6.89    | 4       | 3.34   |
| GAIF01012811.1 | 14.51   | 24.39  | 23.9   | 52.39   | 30.72   | 8.83   |
| GAIF01012812.1 | 17.99   | 21.64  | 19.26  | 19.48   | 26.44   | 4.4    |
| GAIF01012813.1 | 1.95    | 1.64   | 0.71   | 0.09    | 0.16    | 0.26   |
| GAIF01012814.1 | 3.86    | 3.54   | 2.41   | 4.06    | 4.98    | 6.13   |
| GAIF01012815.1 | 10.81   | 6.21   | 10.52  | 16.32   | 12.26   | 10.39  |
| GAIF01012816.1 | 9.35    | 7.24   | 10.95  | 27.04   | 17.16   | 11.92  |
| GAIF01012817.1 | 8.22    | 21.18  | 7.52   | 3.57    | 5.14    | 0.76   |
| GAIF01012819.1 | 0.27    | 0.22   | 0      | 2.31    | 7.74    | 0.51   |
| GAIF01012820.1 | 0       | 0      | 0.25   | 0       | 0       | 0      |
| GAIF01012822.1 | 0       | 0      | 0      | 0.11    | 0.69    | 0      |
| GAIF01012824.1 | 86.42   | 63.04  | 63.79  | 133.59  | 88.29   | 313.05 |
| GAIF01012825.1 | 0.08    | 0.08   | 0      | 0.35    | 2.11    | 0      |
| GAIF01012826.1 | 0       | 0      | 0.08   | 0.08    | 0       | 0      |
| GAIF01012827.1 | 0       | 0      | 0.02   | 0.02    | 0.02    | 0      |
| GAIF01012828.1 | 0       | 0      | 0.03   | 0       | 0       | 0      |
| GAIF01012829.1 | 9.88    | 11.21  | 19.99  | 29.66   | 12.39   | 7.47   |
| GAIF01012831.1 | 1239.99 | 967.31 | 281.01 | 6921.58 | 7984.63 | 763.94 |
| GAIF01012832.1 | 6.68    | 15.11  | 9.51   | 27.86   | 15.44   | 1.67   |
| GAIF01012833.1 | 9.67    | 20.86  | 15.88  | 13.91   | 13.23   | 5.43   |
| GAIF01012834.1 | 5.3     | 8.57   | 7.89   | 8.93    | 8.95    | 4.66   |
| GAIF01012836.1 | 0.13    | 0      | 0      | 0       | 0.69    | 0      |
| GAIF01012837.1 | 0       | 0      | 0      | 0.07    | 0       | 0      |

|                |        |        |        |        |       |       |
|----------------|--------|--------|--------|--------|-------|-------|
| GAIF01012838.1 | 0.46   | 0      | 0      | 0.32   | 3.76  | 0.91  |
| GAIF01012843.1 | 20.77  | 20.97  | 24.42  | 17.3   | 20.09 | 23.55 |
| GAIF01012844.1 | 142.07 | 131.47 | 143.44 | 201.65 | 135.2 | 97.62 |
| GAIF01012845.1 | 0      | 0      | 0      | 0.59   | 0.68  | 0.19  |
| GAIF01012846.1 | 147.14 | 80.56  | 133.71 | 3.68   | 3.49  | 8.63  |
| GAIF01012848.1 | 2.31   | 3      | 1.36   | 11.18  | 6.56  | 1.96  |
| GAIF01012849.1 | 0      | 0      | 0      | 0.32   | 0.17  | 0     |
| GAIF01012850.1 | 0      | 0      | 0      | 0.86   | 1.48  | 0     |
| GAIF01012851.1 | 0.29   | 0      | 0      | 1.01   | 2.1   | 16.14 |
| GAIF01012853.1 | 0.45   | 0      | 0.08   | 0.27   | 2.76  | 0     |
| GAIF01012854.1 | 34.71  | 41     | 33.53  | 34.18  | 38.35 | 22.41 |
| GAIF01012855.1 | 9.66   | 7.05   | 12.06  | 19.76  | 17.55 | 38.67 |
| GAIF01012856.1 | 0      | 0      | 0      | 0.06   | 0     | 0     |
| GAIF01012857.1 | 0.19   | 0      | 0      | 1.37   | 0.05  | 0.21  |
| GAIF01012858.1 | 0.64   | 0.51   | 0.19   | 0.72   | 1.65  | 0.59  |
| GAIF01012859.1 | 0.14   | 0      | 0      | 0      | 0     | 0     |
| GAIF01012862.1 | 0.7    | 0.1    | 0.12   | 1.75   | 5.51  | 0.19  |
| GAIF01012863.1 | 0      | 0      | 0      | 0      | 0.4   | 0     |
| GAIF01012864.1 | 0      | 0      | 0      | 0      | 0.31  | 0     |
| GAIF01012866.1 | 35.97  | 25.59  | 17.46  | 0      | 0     | 0     |
| GAIF01012867.1 | 0      | 0      | 0      | 0      | 0.06  | 0     |
| GAIF01012870.1 | 4.14   | 2.88   | 7.97   | 6.16   | 3.23  | 3.45  |
| GAIF01012871.1 | 11.72  | 9.17   | 0      | 26.13  | 39.79 | 2.14  |
| GAIF01012872.1 | 0.25   | 0.48   | 0.71   | 1.04   | 0.66  | 1.2   |
| GAIF01012874.1 | 4.64   | 8.09   | 16.98  | 14.18  | 10.4  | 20.04 |
| GAIF01012876.1 | 1.38   | 0.58   | 0.12   | 2.7    | 4.33  | 0.23  |
| GAIF01012877.1 | 0.12   | 0.16   | 0.04   | 0.14   | 0.16  | 0.12  |
| GAIF01012878.1 | 0      | 0      | 0      | 0.09   | 0.22  | 0     |
| GAIF01012879.1 | 0      | 0.23   | 0      | 0      | 3.18  | 0     |
| GAIF01012881.1 | 8.95   | 2.4    | 3.35   | 18.8   | 38.39 | 80.19 |
| GAIF01012883.1 | 0      | 0.07   | 0      | 0      | 1.3   | 0     |
| GAIF01012884.1 | 0      | 0      | 0      | 0      | 0.04  | 0     |
| GAIF01012885.1 | 2.39   | 0.91   | 3.21   | 2.24   | 0.83  | 1.99  |
| GAIF01012886.1 | 12.55  | 12.85  | 2.73   | 34.06  | 48.45 | 0.35  |
| GAIF01012887.1 | 0.5    | 0      | 0      | 1.35   | 3.4   | 3.3   |
| GAIF01012888.1 | 0.17   | 0      | 0      | 0      | 0.49  | 0     |
| GAIF01012889.1 | 0.09   | 0.19   | 0      | 1.84   | 4.86  | 0     |
| GAIF01012890.1 | 0      | 0      | 0      | 0      | 0.06  | 0     |
| GAIF01012891.1 | 1.16   | 0      | 0.06   | 4.84   | 7.42  | 0.61  |
| GAIF01012892.1 | 0.44   | 0.12   | 0      | 2.28   | 7.73  | 0     |
| GAIF01012893.1 | 0      | 0      | 0      | 0      | 0     | 0.14  |
| GAIF01012894.1 | 14.54  | 5.75   | 5.7    | 20.49  | 12.83 | 10.2  |
| GAIF01012895.1 | 0      | 0      | 0      | 0      | 0.31  | 0     |
| GAIF01012899.1 | 0      | 0      | 0      | 0.1    | 0.05  | 0     |

|                |         |        |        |       |        |       |
|----------------|---------|--------|--------|-------|--------|-------|
| GAIF01012900.1 | 0.4     | 0      | 0.68   | 0.8   | 9.28   | 0.51  |
| GAIF01012902.1 | 0.16    | 0      | 0      | 0.37  | 1.91   | 0     |
| GAIF01012903.1 | 0.1     | 0      | 0      | 0.22  | 0.7    | 0     |
| GAIF01012904.1 | 0.13    | 0.14   | 0.14   | 2.12  | 2.83   | 0     |
| GAIF01012906.1 | 0.09    | 0.9    | 0.2    | 0.75  | 2.67   | 0     |
| GAIF01012907.1 | 0.85    | 0.64   | 0.35   | 3.88  | 7.86   | 1.76  |
| GAIF01012908.1 | 0.07    | 0      | 0.16   | 0.5   | 1.38   | 0.08  |
| GAIF01012909.1 | 6.54    | 1.42   | 0.57   | 7.59  | 10.07  | 1.44  |
| GAIF01012910.1 | 10.33   | 20.19  | 1.49   | 22.41 | 48.21  | 0.81  |
| GAIF01012911.1 | 1.68    | 1.01   | 1.24   | 2.94  | 3.27   | 1.12  |
| GAIF01012912.1 | 0       | 0.05   | 0.06   | 0.06  | 0.61   | 0     |
| GAIF01012913.1 | 0       | 0      | 0.08   | 0.08  | 0      | 0     |
| GAIF01012914.1 | 0       | 0      | 0      | 0     | 0.13   | 0     |
| GAIF01012915.1 | 8.56    | 10.75  | 6.48   | 20.15 | 17.21  | 0.92  |
| GAIF01012916.1 | 0       | 0      | 0      | 0.13  | 0      | 0     |
| GAIF01012917.1 | 1366.49 | 140.99 | 330.65 | 47.82 | 6.24   | 36.86 |
| GAIF01012919.1 | 0       | 0      | 0      | 0.25  | 0.9    | 0     |
| GAIF01012922.1 | 0       | 0      | 0      | 0     | 3.36   | 0     |
| GAIF01012923.1 | 0.04    | 0      | 0      | 0     | 0.39   | 0     |
| GAIF01012926.1 | 4.93    | 2.45   | 0.48   | 72.03 | 222.06 | 1.89  |
| GAIF01012928.1 | 1.46    | 0.22   | 1.25   | 2.64  | 1.38   | 2.33  |
| GAIF01012931.1 | 4.85    | 3.75   | 2.48   | 6.31  | 9.35   | 3.61  |
| GAIF01012932.1 | 45.95   | 31.77  | 19.92  | 82.01 | 54.02  | 10.35 |
| GAIF01012934.1 | 0       | 0      | 0.06   | 0     | 0      | 0     |
| GAIF01012935.1 | 0       | 0      | 0.15   | 0     | 0.16   | 0.1   |
| GAIF01012936.1 | 0       | 0.03   | 0.03   | 0.03  | 0.03   | 0     |
| GAIF01012937.1 | 0.32    | 0      | 0      | 0     | 2.5    | 0     |
| GAIF01012939.1 | 0       | 0      | 1.11   | 0.38  | 0.53   | 8.45  |
| GAIF01012940.1 | 4.64    | 2.5    | 1.94   | 15.04 | 9.77   | 0.09  |
| GAIF01012941.1 | 10.71   | 0      | 0      | 0.67  | 0      | 0     |
| GAIF01012942.1 | 0       | 0.17   | 0      | 0.54  | 0.93   | 0.17  |
| GAIF01012943.1 | 0       | 0      | 0      | 13.63 | 0      | 0     |
| GAIF01012944.1 | 51.69   | 77.84  | 54.01  | 90.49 | 134.85 | 16.12 |
| GAIF01012945.1 | 0       | 1.2    | 0      | 0     | 0      | 0     |
| GAIF01012946.1 | 0.08    | 0.09   | 0      | 0.16  | 0.19   | 0     |
| GAIF01012947.1 | 0.07    | 0      | 0      | 0.08  | 0.44   | 0.24  |
| GAIF01012948.1 | 6.12    | 2.38   | 2.18   | 1.39  | 1.26   | 0.55  |
| GAIF01012950.1 | 0       | 0.25   | 0.19   | 0.3   | 1.58   | 0     |
| GAIF01012951.1 | 0       | 0      | 0      | 0     | 0.2    | 0     |
| GAIF01012953.1 | 26.96   | 10.1   | 6.94   | 34.64 | 13.77  | 1.23  |
| GAIF01012954.1 | 1.4     | 0.35   | 0.18   | 5.56  | 14.05  | 0.71  |
| GAIF01012955.1 | 0.12    | 1.63   | 0.82   | 2.75  | 6      | 0     |
| GAIF01012957.1 | 0       | 3.14   | 0      | 5.01  | 12.91  | 0     |
| GAIF01012958.1 | 0.07    | 0.11   | 0      | 0.69  | 4.27   | 0.11  |

|                |         |         |          |         |         |         |
|----------------|---------|---------|----------|---------|---------|---------|
| GAIF01012959.1 | 0.34    | 0.37    | 0.53     | 0.08    | 0       | 0.15    |
| GAIF01012960.1 | 1.04    | 1.05    | 2.16     | 1.94    | 1.16    | 1.47    |
| GAIF01012961.1 | 2.13    | 0.86    | 5.19     | 0.76    | 1.04    | 0.54    |
| GAIF01012962.1 | 2.55    | 1.81    | 0.69     | 0.81    | 0.65    | 0.13    |
| GAIF01012963.1 | 0.29    | 0.1     | 0        | 1.27    | 11.06   | 0.84    |
| GAIF01012965.1 | 7.08    | 7.99    | 7.17     | 3.16    | 5.37    | 1.26    |
| GAIF01012966.1 | 2.84    | 2.88    | 0.31     | 11.97   | 28.1    | 5.42    |
| GAIF01012967.1 | 0.92    | 0.21    | 0.22     | 2.47    | 7.19    | 0.34    |
| GAIF01012972.1 | 0       | 0       | 0        | 0.19    | 0.82    | 0       |
| GAIF01012973.1 | 0       | 0       | 0        | 0.05    | 0       | 0       |
| GAIF01012974.1 | 0.7     | 0.49    | 0.48     | 1.02    | 1.06    | 0.29    |
| GAIF01012976.1 | 0       | 0       | 0        | 0.06    | 0.07    | 0       |
| GAIF01012977.1 | 10.42   | 11.33   | 7.34     | 21.87   | 19.28   | 1.91    |
| GAIF01012978.1 | 7.28    | 2.93    | 0.53     | 38.23   | 106.92  | 4.77    |
| GAIF01012979.1 | 0       | 0       | 0        | 0       | 0.05    | 0       |
| GAIF01012983.1 | 0.44    | 0       | 0        | 1.15    | 4.37    | 0       |
| GAIF01012985.1 | 0.3     | 0.65    | 0        | 0.53    | 0       | 0.3     |
| GAIF01012986.1 | 0.19    | 0.06    | 0.19     | 0.39    | 5.34    | 0.32    |
| GAIF01012988.1 | 0       | 0       | 0        | 0       | 1.07    | 0.04    |
| GAIF01012990.1 | 0.08    | 0       | 0        | 0       | 0       | 0       |
| GAIF01012991.1 | 103.67  | 52.36   | 83.05    | 58.17   | 43.32   | 56.36   |
| GAIF01012992.1 | 0       | 0       | 0        | 0       | 0       | 0.1     |
| GAIF01012993.1 | 0.37    | 0       | 0        | 0       | 0       | 0       |
| GAIF01012994.1 | 0       | 0       | 0        | 0       | 0.1     | 0       |
| GAIF01012995.1 | 5439.92 | 6276.91 | 11796.25 | 2969.64 | 2023.17 | 7947.56 |
| GAIF01012996.1 | 0       | 0       | 0        | 2.72    | 0.88    | 0.84    |
| GAIF01012997.1 | 1.57    | 0.52    | 0.22     | 2.29    | 2.44    | 12.53   |
| GAIF01012998.1 | 2.96    | 2.02    | 1.4      | 0.74    | 0.63    | 0.45    |
| GAIF01012999.1 | 1.82    | 0.82    | 0.47     | 0.9     | 6.62    | 16.43   |
| GAIF01013000.1 | 50.4    | 50.55   | 20.59    | 74.13   | 69.2    | 9.09    |
| GAIF01013001.1 | 0.38    | 0.25    | 0.16     | 0.49    | 0.3     | 0.21    |
| GAIF01013002.1 | 5.16    | 1.53    | 0        | 11.65   | 31.89   | 5.29    |
| GAIF01013003.1 | 0.57    | 0.17    | 0        | 0.38    | 0.35    | 0       |
| GAIF01013006.1 | 0       | 0.31    | 0        | 0       | 0       | 0       |
| GAIF01013008.1 | 27.42   | 38.56   | 32.17    | 39.21   | 33.7    | 9.7     |
| GAIF01013009.1 | 4.35    | 2.67    | 2.02     | 2.65    | 3.19    | 9.15    |
| GAIF01013010.1 | 3.96    | 16.17   | 2.7      | 2.37    | 17.06   | 0       |
| GAIF01013012.1 | 0       | 0       | 0        | 0.18    | 1.02    | 0.17    |
| GAIF01013013.1 | 0       | 0       | 0        | 0.79    | 2.13    | 0.15    |
| GAIF01013014.1 | 2.44    | 1.23    | 0.48     | 15.15   | 35.8    | 0.19    |
| GAIF01013015.1 | 30.22   | 6.5     | 1.99     | 27.53   | 50.96   | 73.81   |
| GAIF01013016.1 | 0.51    | 0       | 0        | 2.76    | 5.44    | 0       |
| GAIF01013017.1 | 0       | 0.05    | 0.16     | 0       | 0       | 0       |
| GAIF01013018.1 | 0       | 2.24    | 0        | 2.39    | 3.71    | 2.27    |

|                |        |        |        |        |        |        |
|----------------|--------|--------|--------|--------|--------|--------|
| GAIF01013019.1 | 0.06   | 0.12   | 0.09   | 2.3    | 7.96   | 0.17   |
| GAIF01013020.1 | 1.51   | 0.31   | 0.18   | 26.85  | 173.14 | 7.86   |
| GAIF01013021.1 | 2.34   | 3.18   | 2.27   | 4.55   | 6.21   | 0.38   |
| GAIF01013022.1 | 1.26   | 0.11   | 0      | 0.97   | 1.39   | 1.96   |
| GAIF01013024.1 | 1.94   | 0      | 0      | 3.53   | 24.63  | 0.92   |
| GAIF01013025.1 | 0.44   | 0.69   | 0.17   | 5.52   | 9.59   | 0.61   |
| GAIF01013027.1 | 7.24   | 6.78   | 2.69   | 23.02  | 30.7   | 1.18   |
| GAIF01013028.1 | 0      | 0      | 0      | 0.15   | 0      | 0      |
| GAIF01013029.1 | 0.09   | 0      | 0      | 0.42   | 0.61   | 0      |
| GAIF01013031.1 | 0.1    | 3.89   | 0.75   | 9      | 2.84   | 0.77   |
| GAIF01013032.1 | 0      | 0.41   | 0.33   | 0      | 0      | 0.08   |
| GAIF01013034.1 | 1.16   | 0.52   | 0.28   | 2.63   | 7.26   | 1.57   |
| GAIF01013036.1 | 4.84   | 1.55   | 0.5    | 10     | 37.89  | 11.2   |
| GAIF01013037.1 | 38.66  | 34.83  | 39.82  | 78.05  | 46.36  | 48.08  |
| GAIF01013038.1 | 2.74   | 1.53   | 1.12   | 0.45   | 0.28   | 0.09   |
| GAIF01013039.1 | 0.26   | 0      | 0.06   | 0.36   | 2.1    | 0      |
| GAIF01013041.1 | 1.39   | 1.72   | 1.09   | 6.74   | 10.36  | 1.27   |
| GAIF01013042.1 | 0.79   | 0      | 0      | 1.12   | 5.25   | 0.15   |
| GAIF01013044.1 | 0      | 0      | 0      | 0      | 0.77   | 0.14   |
| GAIF01013045.1 | 0.77   | 3.34   | 0      | 7.12   | 6.69   | 0      |
| GAIF01013047.1 | 0.19   | 0      | 0      | 0.72   | 0.35   | 0      |
| GAIF01013048.1 | 21.55  | 36.79  | 16.15  | 68.72  | 49.18  | 6.29   |
| GAIF01013049.1 | 0      | 0.22   | 0.23   | 3.72   | 5.34   | 0      |
| GAIF01013051.1 | 7.14   | 5.73   | 3.12   | 21.81  | 22.88  | 8.22   |
| GAIF01013052.1 | 1.33   | 0.12   | 0.35   | 3.3    | 21.65  | 2.77   |
| GAIF01013054.1 | 30.9   | 19.32  | 16.45  | 66.47  | 42.61  | 34.82  |
| GAIF01013055.1 | 115.42 | 113.43 | 54.91  | 78.59  | 106.56 | 83.22  |
| GAIF01013056.1 | 1.73   | 0.61   | 0.3    | 0      | 0      | 0.64   |
| GAIF01013057.1 | 45.68  | 26.04  | 28.93  | 69.77  | 64.04  | 93.56  |
| GAIF01013058.1 | 0.07   | 0.04   | 0.08   | 0.68   | 1.82   | 0.11   |
| GAIF01013060.1 | 0.59   | 0.64   | 1.08   | 0.34   | 1.3    | 0.87   |
| GAIF01013061.1 | 1.57   | 1.05   | 1.43   | 1.24   | 0      | 0      |
| GAIF01013062.1 | 120.69 | 64.86  | 106.72 | 156.33 | 71.63  | 394.58 |
| GAIF01013064.1 | 0      | 0.04   | 0.05   | 0      | 0      | 0      |
| GAIF01013067.1 | 19.95  | 34.16  | 34.65  | 48.91  | 44.67  | 10.69  |
| GAIF01013069.1 | 0      | 0      | 0      | 0.3    | 0.34   | 0      |
| GAIF01013071.1 | 0.87   | 0.82   | 0.41   | 1.48   | 1.21   | 0.18   |
| GAIF01013072.1 | 14.53  | 14.39  | 18.21  | 18.27  | 9.51   | 11.23  |
| GAIF01013075.1 | 0.04   | 0      | 0      | 0      | 0      | 0      |
| GAIF01013077.1 | 0.03   | 0      | 0.07   | 0      | 0      | 0      |
| GAIF01013078.1 | 1.05   | 2.15   | 0.74   | 1.01   | 2.58   | 0.61   |
| GAIF01013079.1 | 0      | 0      | 0      | 0      | 0.12   | 0      |
| GAIF01013080.1 | 124.07 | 176.09 | 96.88  | 144.61 | 93.36  | 19.96  |
| GAIF01013081.1 | 98.82  | 53.86  | 37.97  | 89.35  | 105.29 | 139.55 |

|                |         |         |         |        |         |        |
|----------------|---------|---------|---------|--------|---------|--------|
| GAIF01013082.1 | 14.41   | 8.01    | 4.53    | 23     | 48.08   | 17.5   |
| GAIF01013083.1 | 0       | 0       | 0       | 0      | 0.14    | 0      |
| GAIF01013085.1 | 0.21    | 0.06    | 0.17    | 0.79   | 1.69    | 1.55   |
| GAIF01013086.1 | 0.1     | 0.16    | 0.33    | 0.41   | 0.42    | 0.17   |
| GAIF01013088.1 | 0.15    | 0.1     | 0.19    | 0.03   | 0.15    | 0.07   |
| GAIF01013089.1 | 0.11    | 0       | 0       | 0      | 0       | 0      |
| GAIF01013092.1 | 46.72   | 50.66   | 67.93   | 107.01 | 68.04   | 66.43  |
| GAIF01013093.1 | 0.33    | 1.9     | 0.12    | 0.26   | 0.27    | 0      |
| GAIF01013094.1 | 9.47    | 7.93    | 7.65    | 10.59  | 11.96   | 7.54   |
| GAIF01013095.1 | 7.63    | 7.74    | 14.02   | 21.88  | 23.23   | 11.63  |
| GAIF01013098.1 | 4.64    | 0.81    | 0.2     | 9.18   | 20.8    | 11.36  |
| GAIF01013099.1 | 13.28   | 10.18   | 32.29   | 9.29   | 11.86   | 9.27   |
| GAIF01013100.1 | 0.69    | 1.52    | 0.4     | 2.16   | 1.75    | 0.37   |
| GAIF01013101.1 | 0.74    | 0       | 0       | 2.5    | 0       | 0      |
| GAIF01013102.1 | 0       | 0.19    | 0       | 0.07   | 0.3     | 0.03   |
| GAIF01013103.1 | 0       | 0.04    | 0       | 0      | 0       | 0      |
| GAIF01013104.1 | 5733.83 | 4461.19 | 7283.82 | 1419.6 | 1351.47 | 891.07 |
| GAIF01013106.1 | 0       | 0.04    | 0.05    | 0      | 1.05    | 0.01   |
| GAIF01013107.1 | 0.08    | 0       | 0       | 0.09   | 0.19    | 0      |
| GAIF01013109.1 | 0       | 0       | 0       | 0      | 0.79    | 0      |
| GAIF01013111.1 | 22.96   | 16.52   | 12.26   | 56     | 78.13   | 7.24   |
| GAIF01013112.1 | 2.21    | 2.02    | 2.92    | 0.58   | 1.15    | 0.34   |
| GAIF01013114.1 | 0       | 1       | 1.21    | 0      | 0       | 1.01   |
| GAIF01013115.1 | 0.12    | 0.06    | 0       | 0.06   | 0.1     | 0      |
| GAIF01013116.1 | 0       | 0.08    | 0       | 0.26   | 0.74    | 0.09   |
| GAIF01013117.1 | 0.11    | 0       | 0       | 0.06   | 0       | 0      |
| GAIF01013118.1 | 29.97   | 6.71    | 0       | 8.7    | 9.01    | 74.32  |
| GAIF01013119.1 | 0       | 0       | 0       | 0.14   | 0       | 0      |
| GAIF01013120.1 | 0       | 0       | 0       | 0      | 0.13    | 0      |
| GAIF01013121.1 | 0.63    | 0.23    | 0.23    | 0.73   | 1.13    | 0.23   |
| GAIF01013122.1 | 1.29    | 0.21    | 0       | 0      | 1.91    | 0      |
| GAIF01013123.1 | 0.04    | 0.04    | 0       | 0      | 0       | 0      |
| GAIF01013125.1 | 0.78    | 0.47    | 0       | 0.1    | 0.21    | 0.1    |
| GAIF01013126.1 | 19.32   | 44.02   | 14.92   | 76.48  | 45.24   | 3.04   |
| GAIF01013127.1 | 0       | 0       | 0.09    | 0.4    | 0.18    | 0      |
| GAIF01013128.1 | 0       | 0       | 0       | 0.61   | 1.91    | 0.15   |
| GAIF01013129.1 | 0.96    | 0.57    | 0.38    | 4.35   | 9.86    | 0.19   |
| GAIF01013130.1 | 0       | 0       | 0       | 0      | 0.48    | 0.55   |
| GAIF01013133.1 | 0       | 0.4     | 0       | 0      | 0.19    | 0.24   |
| GAIF01013134.1 | 6.92    | 11.18   | 6.09    | 18.32  | 13.34   | 2.09   |
| GAIF01013135.1 | 0       | 0       | 0       | 0      | 0.2     | 0      |
| GAIF01013137.1 | 0       | 0       | 0       | 0.07   | 0       | 0      |
| GAIF01013138.1 | 3.36    | 2.18    | 0.31    | 14.15  | 26.24   | 2.27   |
| GAIF01013139.1 | 0.22    | 0.16    | 0.08    | 1.02   | 7.04    | 0      |

|                |       |       |        |        |        |        |
|----------------|-------|-------|--------|--------|--------|--------|
| GAIF01013142.1 | 5.51  | 1.93  | 1.74   | 9      | 3.78   | 5.17   |
| GAIF01013143.1 | 0.15  | 0     | 0      | 0      | 0.18   | 0      |
| GAIF01013144.1 | 1.73  | 0.94  | 0      | 1.95   | 3.77   | 0.12   |
| GAIF01013145.1 | 3.88  | 0     | 0      | 0.8    | 0      | 0      |
| GAIF01013147.1 | 0.53  | 0.48  | 0.1    | 0.41   | 0.21   | 0      |
| GAIF01013149.1 | 15.07 | 13.27 | 12.39  | 30.24  | 27.33  | 4.56   |
| GAIF01013150.1 | 0.38  | 1.91  | 1.28   | 0.45   | 0.48   | 0.9    |
| GAIF01013152.1 | 0.99  | 0.88  | 7.34   | 0      | 0      | 9.41   |
| GAIF01013153.1 | 0.06  | 0     | 0.26   | 0      | 0      | 0.07   |
| GAIF01013154.1 | 44.64 | 18.36 | 7.46   | 95.39  | 121.6  | 15.87  |
| GAIF01013155.1 | 17.55 | 12.92 | 10.38  | 50.49  | 52.13  | 9.78   |
| GAIF01013156.1 | 34.98 | 26.25 | 13.74  | 59.22  | 54.5   | 3.66   |
| GAIF01013157.1 | 0.01  | 0     | 0      | 0      | 0.03   | 0      |
| GAIF01013158.1 | 0     | 0     | 0      | 0.05   | 0.05   | 0      |
| GAIF01013159.1 | 7.08  | 3.82  | 4.28   | 16.59  | 10.48  | 3.43   |
| GAIF01013160.1 | 0     | 0     | 0      | 0.34   | 0.85   | 0      |
| GAIF01013161.1 | 0.16  | 0     | 0      | 0      | 1.16   | 0.36   |
| GAIF01013163.1 | 1.07  | 0     | 0      | 0      | 0      | 0      |
| GAIF01013165.1 | 0     | 0     | 0      | 0      | 0.1    | 0      |
| GAIF01013166.1 | 0     | 0     | 0      | 0.3    | 0.39   | 0      |
| GAIF01013167.1 | 35.36 | 53.48 | 32.12  | 45.39  | 29.55  | 7.29   |
| GAIF01013169.1 | 35.99 | 22.69 | 14.42  | 47.4   | 26.61  | 5.35   |
| GAIF01013171.1 | 34.17 | 21.03 | 23.59  | 60.79  | 98.15  | 85.13  |
| GAIF01013172.1 | 390.3 | 286   | 291.45 | 0.72   | 1.26   | 0.21   |
| GAIF01013173.1 | 3.32  | 1.91  | 0.11   | 17.21  | 41.66  | 0.54   |
| GAIF01013176.1 | 0     | 0.02  | 0      | 0      | 0.05   | 0.19   |
| GAIF01013177.1 | 5.27  | 3.57  | 2.32   | 0.95   | 0.42   | 0.39   |
| GAIF01013178.1 | 5.05  | 4.18  | 5.6    | 11.45  | 6.54   | 2.35   |
| GAIF01013180.1 | 0     | 0     | 0      | 0      | 0.01   | 0      |
| GAIF01013181.1 | 0.41  | 0.19  | 0.05   | 2.58   | 8.96   | 0.09   |
| GAIF01013182.1 | 1.31  | 1.43  | 0.16   | 3.05   | 3.68   | 0      |
| GAIF01013183.1 | 0.11  | 0.02  | 0      | 0.1    | 2.66   | 0.02   |
| GAIF01013185.1 | 54.96 | 62.29 | 85.41  | 114.1  | 81.46  | 35.55  |
| GAIF01013186.1 | 1.65  | 0.67  | 0      | 10.79  | 38.15  | 0.57   |
| GAIF01013187.1 | 8.7   | 5.03  | 4.18   | 2.52   | 1.11   | 0.24   |
| GAIF01013188.1 | 91.78 | 85.54 | 129.56 | 928.27 | 457.28 | 491.31 |
| GAIF01013189.1 | 0     | 0     | 0.04   | 0      | 0.05   | 0.19   |
| GAIF01013191.1 | 0.44  | 0     | 0      | 0      | 1.94   | 0      |
| GAIF01013192.1 | 0.27  | 0     | 0.15   | 0      | 0      | 0      |
| GAIF01013193.1 | 0.23  | 0.27  | 0.08   | 0.36   | 1.59   | 0.14   |
| GAIF01013194.1 | 0.85  | 0.38  | 0.08   | 0.45   | 0.3    | 0.16   |
| GAIF01013195.1 | 0     | 0     | 0.06   | 0      | 0.02   | 0      |
| GAIF01013196.1 | 0     | 0     | 0      | 0.19   | 0      | 0      |
| GAIF01013197.1 | 0.14  | 0.29  | 1.63   | 2.04   | 1.79   | 1.04   |

|                |        |        |         |         |        |        |
|----------------|--------|--------|---------|---------|--------|--------|
| GAIF01013199.1 | 0.51   | 0.08   | 0       | 0.59    | 1.41   | 0      |
| GAIF01013200.1 | 93.41  | 45.15  | 37.32   | 12.41   | 10.04  | 2.56   |
| GAIF01013201.1 | 0.17   | 0      | 0       | 0.6     | 0.21   | 0      |
| GAIF01013205.1 | 0.04   | 0      | 0       | 0       | 0      | 0      |
| GAIF01013208.1 | 174.44 | 118.68 | 139.16  | 615.17  | 294.64 | 402.59 |
| GAIF01013209.1 | 0      | 0      | 0.45    | 0       | 0      | 0      |
| GAIF01013210.1 | 0      | 0.16   | 0       | 0       | 0      | 0      |
| GAIF01013212.1 | 0      | 0      | 0       | 0.6     | 0.53   | 0      |
| GAIF01013213.1 | 0.23   | 0      | 0       | 0       | 0      | 0      |
| GAIF01013214.1 | 1.05   | 2.74   | 1.54    | 0.49    | 0.51   | 0      |
| GAIF01013217.1 | 0      | 0.08   | 0       | 0       | 0      | 0      |
| GAIF01013218.1 | 16.41  | 37.55  | 27.78   | 58.01   | 34.74  | 6.8    |
| GAIF01013219.1 | 0.15   | 0      | 0       | 0.27    | 1.67   | 0.08   |
| GAIF01013220.1 | 1661.8 | 989.55 | 1274.56 | 1553.43 | 631.18 | 484.04 |
| GAIF01013221.1 | 0      | 0      | 0.47    | 0       | 0      | 0      |
| GAIF01013225.1 | 0.5    | 0.41   | 0.14    | 1.16    | 1.05   | 0.27   |
| GAIF01013227.1 | 0      | 0      | 0       | 0       | 0      | 0.24   |
| GAIF01013228.1 | 7.9    | 4.7    | 4.91    | 7.59    | 6.55   | 20.5   |
| GAIF01013229.1 | 0.5    | 0.04   | 0.1     | 0.47    | 1.03   | 1.3    |
| GAIF01013230.1 | 133.78 | 130.76 | 147.44  | 0.2     | 0.42   | 0      |
| GAIF01013231.1 | 0.53   | 0      | 0       | 0.73    | 5.64   | 0      |
| GAIF01013232.1 | 0      | 0      | 0       | 0.41    | 0      | 0      |
| GAIF01013233.1 | 3.55   | 7.13   | 2.83    | 9.75    | 18.1   | 0.43   |
| GAIF01013234.1 | 3.43   | 3.73   | 0.75    | 1.19    | 2.34   | 0      |
| GAIF01013235.1 | 0.96   | 0.17   | 0.18    | 0       | 0.96   | 0      |
| GAIF01013236.1 | 0.58   | 0.27   | 0.27    | 0.38    | 0.4    | 0.09   |
| GAIF01013237.1 | 0.12   | 0.34   | 0.17    | 3       | 8.91   | 0      |
| GAIF01013238.1 | 0      | 0.04   | 0       | 0       | 0.04   | 0      |
| GAIF01013240.1 | 0.48   | 0      | 0       | 1.62    | 4.66   | 1.05   |
| GAIF01013241.1 | 0.06   | 0      | 0       | 0.15    | 0.68   | 0.12   |
| GAIF01013244.1 | 0.23   | 0.42   | 0.1     | 0.43    | 0.51   | 0.02   |
| GAIF01013248.1 | 0      | 0.35   | 0.16    | 0.19    | 0.2    | 0.32   |
| GAIF01013249.1 | 0.23   | 0.08   | 0       | 0.54    | 1.4    | 0.09   |
| GAIF01013250.1 | 0      | 0      | 0       | 0.29    | 0.9    | 0      |
| GAIF01013251.1 | 4.74   | 7.29   | 0.39    | 17.39   | 88.83  | 0      |
| GAIF01013252.1 | 0.47   | 0.68   | 0.34    | 1.46    | 3.39   | 0.52   |
| GAIF01013253.1 | 52.61  | 47.89  | 51.28   | 171.66  | 110.54 | 57.55  |
| GAIF01013256.1 | 180.48 | 92.96  | 84.1    | 125.51  | 72.47  | 91.66  |
| GAIF01013261.1 | 9.89   | 9.42   | 3.25    | 20.59   | 15.32  | 3.26   |
| GAIF01013263.1 | 76.23  | 99     | 124.8   | 39.44   | 41.97  | 71.52  |
| GAIF01013264.1 | 0.07   | 0.04   | 0       | 0.04    | 0      | 0      |
| GAIF01013265.1 | 0.1    | 0.2    | 0       | 0.22    | 0      | 0      |
| GAIF01013266.1 | 0      | 0.16   | 0       | 0.17    | 0.51   | 0      |
| GAIF01013267.1 | 29.99  | 82.86  | 42.03   | 21.19   | 29.06  | 5.2    |



|                |        |        |         |         |        |       |
|----------------|--------|--------|---------|---------|--------|-------|
| GAIF01013269.1 | 0      | 28.92  | 23.17   | 0       | 0.11   | 2.64  |
| GAIF01013270.1 | 0.11   | 0.06   | 0.06    | 0       | 0.25   | 0     |
| GAIF01013271.1 | 42.18  | 52.9   | 42.89   | 48.82   | 42.87  | 25.03 |
| GAIF01013272.1 | 0      | 0      | 0       | 0.11    | 0      | 0     |
| GAIF01013273.1 | 0.28   | 0.56   | 0.43    | 1.06    | 0.63   | 0     |
| GAIF01013274.1 | 0      | 0      | 0.07    | 0       | 0      | 0     |
| GAIF01013275.1 | 0      | 0.12   | 0       | 0.24    | 0.25   | 0     |
| GAIF01013276.1 | 43.83  | 40.68  | 51.2    | 87.78   | 49.01  | 36.08 |
| GAIF01013277.1 | 913.28 | 853.34 | 1004.77 | 1614.47 | 637.88 | 307.4 |
| GAIF01013278.1 | 45.21  | 27.66  | 47.57   | 28.17   | 21.64  | 7.53  |
| GAIF01013279.1 | 13.64  | 20.78  | 6.54    | 4.34    | 1.09   | 0     |
| GAIF01013281.1 | 0.05   | 0.06   | 0       | 0.18    | 0.06   | 0     |
| GAIF01013282.1 | 0.11   | 0      | 0.12    | 0.13    | 0.83   | 0.24  |
| GAIF01013283.1 | 1.59   | 1.49   | 0.51    | 0.66    | 0.54   | 0.39  |
| GAIF01013284.1 | 0      | 6.49   | 3.51    | 0       | 0      | 0.34  |
| GAIF01013285.1 | 29.46  | 43.96  | 38.88   | 125.59  | 108.56 | 33.06 |
| GAIF01013286.1 | 32.55  | 154.38 | 65.74   | 23.1    | 62.82  | 6.05  |
| GAIF01013287.1 | 14.45  | 22.25  | 14.77   | 39.2    | 26.33  | 4.73  |
| GAIF01013288.1 | 2.48   | 4.88   | 0.98    | 3.7     | 11.34  | 2.84  |
| GAIF01013289.1 | 27.05  | 28.75  | 12.29   | 21.33   | 36.07  | 12.03 |
| GAIF01013290.1 | 32.48  | 17.72  | 20.58   | 5.27    | 1.68   | 1.8   |
| GAIF01013291.1 | 0.02   | 0      | 0       | 0       | 0      | 0     |
| GAIF01013295.1 | 1.57   | 0.85   | 1.46    | 4.23    | 3.26   | 0.93  |
| GAIF01013296.1 | 0.08   | 0      | 0       | 0       | 0.32   | 0.03  |
| GAIF01013297.1 | 0.08   | 0.08   | 0       | 0.44    | 3.8    | 0.58  |
| GAIF01013298.1 | 0      | 0      | 0       | 0       | 0.13   | 0     |
| GAIF01013301.1 | 0      | 0      | 0       | 0.43    | 2.45   | 0     |
| GAIF01013303.1 | 5.05   | 5.19   | 2.57    | 2.39    | 2.7    | 0.72  |
| GAIF01013304.1 | 1.11   | 1.84   | 0.37    | 0.62    | 0.21   | 0     |
| GAIF01013305.1 | 0.07   | 0.08   | 0       | 0.67    | 2.25   | 0.08  |
| GAIF01013306.1 | 0.04   | 0.09   | 0       | 0       | 0.8    | 0     |
| GAIF01013308.1 | 0.08   | 0.08   | 0.24    | 0.17    | 0.07   | 0     |
| GAIF01013309.1 | 17.83  | 20.48  | 16.06   | 11.91   | 15.04  | 7.85  |
| GAIF01013310.1 | 0      | 0      | 0       | 0.78    | 1.64   | 0     |
| GAIF01013311.1 | 0      | 0.21   | 0       | 0.15    | 0.47   | 0     |
| GAIF01013312.1 | 0.11   | 0      | 0       | 0.88    | 1.57   | 0     |
| GAIF01013313.1 | 26.86  | 25.52  | 22.11   | 19.68   | 15.72  | 13.46 |
| GAIF01013314.1 | 0      | 0      | 0       | 0       | 0.13   | 0     |
| GAIF01013315.1 | 0      | 0      | 0.1     | 0       | 0      | 0     |
| GAIF01013316.1 | 0.31   | 0      | 0       | 0.12    | 0.13   | 0     |
| GAIF01013318.1 | 0      | 0.07   | 0       | 0.07    | 0.07   | 0     |
| GAIF01013319.1 | 1.85   | 0.7    | 0.58    | 11.11   | 48.08  | 1.16  |
| GAIF01013320.1 | 0      | 0.52   | 0.05    | 0       | 1.65   | 0.14  |
| GAIF01013321.1 | 0.13   | 0.65   | 0.14    | 0.44    | 0.2    | 0.09  |

|                |       |       |       |        |       |        |
|----------------|-------|-------|-------|--------|-------|--------|
| GAIF01013322.1 | 0     | 0.13  | 0     | 0      | 0     | 0      |
| GAIF01013323.1 | 1.3   | 4.06  | 2.01  | 1.59   | 3.49  | 0.17   |
| GAIF01013324.1 | 74.12 | 47.11 | 53.48 | 39.86  | 2.43  | 15.35  |
| GAIF01013326.1 | 9.25  | 5.34  | 10.71 | 23.81  | 12.56 | 11.16  |
| GAIF01013327.1 | 13.58 | 21.12 | 19.65 | 36.26  | 20.1  | 10.96  |
| GAIF01013328.1 | 0     | 0     | 0     | 0.47   | 2.34  | 0      |
| GAIF01013329.1 | 0     | 3.97  | 2.87  | 2.35   | 2.41  | 0      |
| GAIF01013330.1 | 1.16  | 0     | 0     | 0      | 0     | 0      |
| GAIF01013331.1 | 0     | 0     | 0.1   | 0      | 0     | 0      |
| GAIF01013334.1 | 0     | 0.11  | 0.46  | 0      | 0     | 0.21   |
| GAIF01013335.1 | 0     | 0     | 0     | 0      | 0.16  | 0      |
| GAIF01013337.1 | 30.28 | 42.52 | 29.45 | 61.3   | 52.55 | 7.88   |
| GAIF01013338.1 | 16.06 | 11.57 | 7.05  | 27.09  | 9.97  | 3.05   |
| GAIF01013339.1 | 0.25  | 0.23  | 0.14  | 1.02   | 3.44  | 0.05   |
| GAIF01013340.1 | 0.21  | 0.29  | 0.24  | 0.31   | 0.45  | 0.06   |
| GAIF01013341.1 | 0     | 0     | 0     | 0      | 0.23  | 0      |
| GAIF01013342.1 | 0     | 0     | 0     | 0      | 0.14  | 0      |
| GAIF01013344.1 | 25.68 | 41.19 | 30.21 | 53.45  | 31.99 | 10.15  |
| GAIF01013346.1 | 0     | 0.19  | 0.33  | 0      | 0     | 0.13   |
| GAIF01013347.1 | 2.57  | 2.92  | 2     | 3.78   | 7.24  | 1.62   |
| GAIF01013349.1 | 0     | 0.11  | 0.11  | 0.14   | 0     | 0.12   |
| GAIF01013350.1 | 0.34  | 0     | 0.12  | 0.92   | 7.18  | 0.5    |
| GAIF01013351.1 | 0.59  | 1.02  | 0.51  | 0      | 0.28  | 0.13   |
| GAIF01013353.1 | 2.46  | 2.55  | 3.41  | 1.97   | 1.09  | 5.31   |
| GAIF01013354.1 | 0.65  | 0.28  | 0     | 6.15   | 25.66 | 1.14   |
| GAIF01013357.1 | 5.36  | 5.82  | 3.92  | 6.77   | 5.65  | 2.86   |
| GAIF01013359.1 | 0     | 0     | 0.13  | 0      | 0     | 0      |
| GAIF01013360.1 | 2.35  | 1.43  | 1.53  | 12.39  | 7.64  | 4.55   |
| GAIF01013361.1 | 8.95  | 16.82 | 4.11  | 13.02  | 7.63  | 0.81   |
| GAIF01013362.1 | 0     | 0     | 0.1   | 0      | 0.47  | 0      |
| GAIF01013364.1 | 49.42 | 0.17  | 5.46  | 32.1   | 7.1   | 36.14  |
| GAIF01013365.1 | 1.72  | 1.21  | 0     | 3.87   | 7.16  | 0      |
| GAIF01013366.1 | 1.73  | 2.61  | 4.8   | 2.72   | 2.11  | 0.97   |
| GAIF01013367.1 | 0     | 0     | 0.05  | 0.02   | 0     | 0      |
| GAIF01013369.1 | 0     | 0.02  | 0     | 0.06   | 0.46  | 0      |
| GAIF01013370.1 | 0     | 0     | 0     | 0.83   | 2.67  | 0.29   |
| GAIF01013371.1 | 0     | 0     | 0     | 0      | 0.14  | 0      |
| GAIF01013375.1 | 1.92  | 0.18  | 0     | 3.8    | 15.84 | 1.96   |
| GAIF01013376.1 | 0.06  | 0.13  | 0.06  | 0.8    | 1.73  | 0      |
| GAIF01013378.1 | 46.94 | 64.76 | 52.24 | 92.95  | 67.77 | 25.45  |
| GAIF01013381.1 | 66.73 | 32.86 | 63.53 | 105.98 | 83.53 | 184.58 |
| GAIF01013382.1 | 0.43  | 0     | 0.25  | 0.62   | 1.01  | 0.28   |
| GAIF01013383.1 | 1.79  | 5.08  | 6     | 3.11   | 0     | 1.28   |
| GAIF01013384.1 | 6.57  | 5.69  | 2.93  | 1.43   | 0.49  | 0.11   |

|                |        |        |         |        |        |        |
|----------------|--------|--------|---------|--------|--------|--------|
| GAIF01013386.1 | 0.12   | 0      | 0       | 1.92   | 0      | 0.91   |
| GAIF01013388.1 | 0      | 0.13   | 0       | 0      | 0      | 0      |
| GAIF01013389.1 | 0.66   | 6.1    | 0.39    | 2.77   | 10.84  | 1.07   |
| GAIF01013390.1 | 0      | 2.26   | 0       | 2.03   | 0      | 1.26   |
| GAIF01013391.1 | 0      | 0      | 0       | 0.62   | 1.68   | 0      |
| GAIF01013395.1 | 44.46  | 43.02  | 32.28   | 93.46  | 114.09 | 16.43  |
| GAIF01013396.1 | 2.04   | 0      | 0       | 0      | 0      | 0      |
| GAIF01013397.1 | 0.12   | 0      | 0.35    | 0.46   | 0      | 0      |
| GAIF01013400.1 | 1.09   | 2.04   | 0.33    | 4.24   | 6.53   | 0.16   |
| GAIF01013403.1 | 0      | 0      | 0       | 2.33   | 0      | 0.21   |
| GAIF01013404.1 | 39.79  | 36.65  | 28.6    | 49.56  | 50.6   | 49.46  |
| GAIF01013405.1 | 0.53   | 0.14   | 0.06    | 1.48   | 5.43   | 3.51   |
| GAIF01013406.1 | 0.04   | 0.04   | 0       | 0.02   | 0.04   | 0.03   |
| GAIF01013407.1 | 17.41  | 9.44   | 11.76   | 7.77   | 6.06   | 11.48  |
| GAIF01013408.1 | 0.77   | 0.77   | 0.77    | 0.59   | 0.42   | 0.65   |
| GAIF01013409.1 | 36.13  | 16.53  | 10.38   | 11.47  | 17.4   | 2.8    |
| GAIF01013412.1 | 2.36   | 2.38   | 0.92    | 1.76   | 0.4    | 0.74   |
| GAIF01013414.1 | 0      | 0      | 0       | 0.25   | 0.52   | 0.08   |
| GAIF01013415.1 | 3.71   | 2.16   | 1.29    | 2.03   | 4.71   | 1.58   |
| GAIF01013416.1 | 0.04   | 0      | 0       | 0.15   | 0.66   | 0      |
| GAIF01013417.1 | 19.23  | 21.88  | 25.42   | 31     | 42.62  | 19.23  |
| GAIF01013418.1 | 0      | 0      | 0.16    | 0      | 0      | 0      |
| GAIF01013419.1 | 15.98  | 18.5   | 23.77   | 3.59   | 7.13   | 5.68   |
| GAIF01013420.1 | 0      | 0      | 0       | 0      | 0.12   | 0      |
| GAIF01013421.1 | 0.77   | 0.23   | 0.07    | 1.87   | 4.97   | 0.13   |
| GAIF01013422.1 | 10.9   | 3.03   | 1.87    | 13.34  | 0.85   | 0.27   |
| GAIF01013423.1 | 0.1    | 0.02   | 0.13    | 0.09   | 0.11   | 0.04   |
| GAIF01013425.1 | 0      | 0      | 0       | 0      | 0.11   | 0      |
| GAIF01013426.1 | 54.71  | 36.89  | 37.95   | 116.9  | 50.99  | 104.25 |
| GAIF01013427.1 | 0      | 0.11   | 0       | 0.12   | 0.96   | 0      |
| GAIF01013428.1 | 0.21   | 0.36   | 0       | 2.43   | 14.37  | 0      |
| GAIF01013429.1 | 0.48   | 0.64   | 2.58    | 0.46   | 3.34   | 1.84   |
| GAIF01013432.1 | 5.87   | 6.41   | 10.26   | 17.7   | 41.4   | 23.1   |
| GAIF01013433.1 | 0      | 0      | 0       | 0      | 0.42   | 0      |
| GAIF01013435.1 | 0      | 0.13   | 0       | 0      | 0      | 0      |
| GAIF01013436.1 | 0.59   | 0.37   | 0.09    | 0.79   | 10.79  | 0.09   |
| GAIF01013437.1 | 0      | 12.87  | 16.53   | 0      | 0      | 3.37   |
| GAIF01013438.1 | 0.08   | 0      | 0       | 0      | 0.06   | 0      |
| GAIF01013439.1 | 0      | 0      | 0       | 0.09   | 0      | 0      |
| GAIF01013441.1 | 0.02   | 0.04   | 0       | 0.08   | 1.14   | 0.04   |
| GAIF01013442.1 | 0.51   | 0.58   | 0.51    | 0.34   | 1.21   | 0.05   |
| GAIF01013443.1 | 33.19  | 30.23  | 26.85   | 3.83   | 4.95   | 4.27   |
| GAIF01013444.1 | 501.32 | 826.75 | 1792.46 | 351.09 | 200.87 | 479.83 |
| GAIF01013445.1 | 27.64  | 19.44  | 23.75   | 17.32  | 10.06  | 21.07  |

|                |        |       |         |        |        |        |
|----------------|--------|-------|---------|--------|--------|--------|
| GAIF01013446.1 | 0.35   | 0     | 0       | 0.41   | 4.12   | 2.35   |
| GAIF01013447.1 | 0      | 0     | 0       | 0      | 0.44   | 0      |
| GAIF01013449.1 | 0      | 0.1   | 0.31    | 0.22   | 0.23   | 0      |
| GAIF01013452.1 | 5.73   | 7.52  | 3.14    | 51.2   | 60.24  | 6.26   |
| GAIF01013453.1 | 0      | 0     | 0       | 0.26   | 4.28   | 0.12   |
| GAIF01013454.1 | 2.85   | 2.32  | 1.17    | 4.68   | 0      | 2.17   |
| GAIF01013455.1 | 0.2    | 0.38  | 0.29    | 0.3    | 0.3    | 0.17   |
| GAIF01013456.1 | 0      | 0     | 0       | 0      | 0      | 0.1    |
| GAIF01013457.1 | 0      | 0     | 0       | 0      | 0.61   | 0      |
| GAIF01013458.1 | 0.02   | 0.05  | 0.02    | 0.18   | 1.93   | 0.07   |
| GAIF01013459.1 | 0.48   | 0.41  | 0.21    | 0.22   | 1.49   | 0.21   |
| GAIF01013460.1 | 2.87   | 3.12  | 0.53    | 3.06   | 5.47   | 0      |
| GAIF01013462.1 | 0.05   | 0     | 0       | 0      | 0.4    | 0      |
| GAIF01013463.1 | 0      | 0     | 0       | 0.03   | 0.03   | 0      |
| GAIF01013464.1 | 2.57   | 4.4   | 1.33    | 3.76   | 2.92   | 0.6    |
| GAIF01013465.1 | 0      | 0.17  | 0       | 0.54   | 2.22   | 0      |
| GAIF01013466.1 | 0      | 0     | 0       | 0.11   | 0.17   | 0      |
| GAIF01013469.1 | 0.53   | 0.08  | 0.08    | 3.85   | 11.88  | 0.12   |
| GAIF01013470.1 | 0      | 0.03  | 0       | 0.27   | 0.8    | 0.07   |
| GAIF01013471.1 | 4.99   | 2.47  | 2.59    | 4.8    | 1.56   | 3.41   |
| GAIF01013472.1 | 0      | 0.08  | 0.16    | 0      | 0.24   | 0.05   |
| GAIF01013474.1 | 10.68  | 14.69 | 4.55    | 25.53  | 26.6   | 1.18   |
| GAIF01013475.1 | 308.52 | 597.1 | 1195.63 | 769.83 | 500.63 | 344.45 |
| GAIF01013476.1 | 2.36   | 0.22  | 0.49    | 21.28  | 55.08  | 18.38  |
| GAIF01013477.1 | 0.12   | 0.25  | 0       | 0      | 0      | 0      |
| GAIF01013478.1 | 47.32  | 61.59 | 71.35   | 56.42  | 37.47  | 13.6   |
| GAIF01013479.1 | 0      | 0     | 0       | 0.13   | 0      | 0      |
| GAIF01013480.1 | 19.7   | 25.42 | 34.57   | 42.22  | 44.76  | 22.07  |
| GAIF01013482.1 | 25.04  | 72.62 | 28.6    | 78.08  | 65.61  | 0.37   |
| GAIF01013484.1 | 0.26   | 0.11  | 0       | 1.03   | 7.29   | 0.19   |
| GAIF01013485.1 | 0.23   | 0     | 0       | 0.24   | 0      | 0.08   |
| GAIF01013486.1 | 0      | 2.56  | 3.8     | 0      | 0      | 0.2    |
| GAIF01013488.1 | 12.87  | 7.05  | 20.23   | 23.89  | 12.01  | 64.32  |
| GAIF01013489.1 | 73.2   | 88.04 | 77.79   | 76.43  | 69.33  | 31.77  |
| GAIF01013490.1 | 0.15   | 0.16  | 0       | 0.52   | 0.54   | 0      |
| GAIF01013491.1 | 9.63   | 5.94  | 4.24    | 16.65  | 12.26  | 3.69   |
| GAIF01013492.1 | 0.13   | 0     | 0       | 0      | 0      | 0.14   |
| GAIF01013493.1 | 0.85   | 0     | 0       | 0      | 0      | 0      |
| GAIF01013494.1 | 3.35   | 2.39  | 0       | 5.24   | 1.72   | 0      |
| GAIF01013501.1 | 0.09   | 0     | 0       | 0      | 0.33   | 0      |
| GAIF01013502.1 | 15.59  | 20.97 | 16.93   | 23.49  | 0      | 14.39  |
| GAIF01013505.1 | 2.32   | 1.21  | 3.86    | 5.08   | 4.84   | 1.7    |
| GAIF01013506.1 | 0      | 0     | 0       | 0.04   | 0.08   | 0      |
| GAIF01013507.1 | 0      | 0.02  | 0       | 0.28   | 1.24   | 0      |

|                |        |       |        |        |        |          |
|----------------|--------|-------|--------|--------|--------|----------|
| GAIF01013509.1 | 0.21   | 0.13  | 0.21   | 0.15   | 0.15   | 0.17     |
| GAIF01013510.1 | 0      | 0     | 0      | 0      | 0.01   | 0        |
| GAIF01013511.1 | 26.46  | 26.51 | 16.25  | 154.81 | 70.11  | 28.53    |
| GAIF01013515.1 | 0      | 0.39  | 0      | 0      | 0      | 0.07     |
| GAIF01013516.1 | 0      | 0     | 0      | 0      | 10.74  | 0        |
| GAIF01013517.1 | 0.69   | 0.6   | 0      | 4.32   | 18.9   | 1.82     |
| GAIF01013518.1 | 0      | 0     | 0      | 0      | 0.33   | 0        |
| GAIF01013519.1 | 46.19  | 42.58 | 123.33 | 58.07  | 35     | 74.06    |
| GAIF01013520.1 | 0      | 0     | 0      | 0      | 0.03   | 0        |
| GAIF01013521.1 | 1.89   | 0.85  | 0.41   | 1.5    | 5.23   | 0.68     |
| GAIF01013522.1 | 19.07  | 28.66 | 10.94  | 5.55   | 3.59   | 0.35     |
| GAIF01013523.1 | 1.1    | 1.14  | 0.26   | 1.15   | 1.47   | 0        |
| GAIF01013525.1 | 0      | 0.68  | 1.37   | 0      | 0      | 0        |
| GAIF01013526.1 | 0      | 0.05  | 0.59   | 0      | 0.12   | 0.16     |
| GAIF01013527.1 | 11.02  | 16.28 | 14.74  | 25.38  | 17.12  | 8.18     |
| GAIF01013528.1 | 0.07   | 0     | 0      | 0      | 0.25   | 0        |
| GAIF01013529.1 | 0.22   | 0.33  | 0.27   | 0.73   | 0.4    | 0.59     |
| GAIF01013530.1 | 9.74   | 11.53 | 8.53   | 21.9   | 28.18  | 6.52     |
| GAIF01013531.1 | 0.11   | 0.16  | 0      | 0.12   | 0.14   | 0        |
| GAIF01013532.1 | 8.09   | 11.54 | 2.47   | 17.31  | 20.24  | 2.73     |
| GAIF01013533.1 | 3.37   | 12.66 | 9.11   | 8.11   | 7.81   | 1.25     |
| GAIF01013534.1 | 1.13   | 1.84  | 2.48   | 0.66   | 2.04   | 0        |
| GAIF01013535.1 | 0.11   | 0.25  | 0      | 2.12   | 10.71  | 0.13     |
| GAIF01013536.1 | 0      | 0     | 0.08   | 0      | 3.62   | 0        |
| GAIF01013537.1 | 0      | 0     | 0      | 0.71   | 0      | 0        |
| GAIF01013538.1 | 216.73 | 298.2 | 208.51 | 130.1  | 211.81 | 373.18   |
| GAIF01013541.1 | 0      | 0     | 0      | 0      | 0.23   | 0        |
| GAIF01013543.1 | 0      | 0.07  | 0.07   | 0.15   | 0      | 0        |
| GAIF01013544.1 | 0      | 0.13  | 0      | 0.27   | 0.56   | 0        |
| GAIF01013545.1 | 0      | 0.82  | 1.83   | 0      | 0      | 2.9      |
| GAIF01013547.1 | 3.58   | 6.64  | 11.62  | 10.08  | 5.94   | 5.5      |
| GAIF01013548.1 | 0      | 0     | 0      | 0      | 0.26   | 0.05     |
| GAIF01013550.1 | 0      | 0     | 0      | 0.09   | 0.48   | 0        |
| GAIF01013551.1 | 1.47   | 1.65  | 1.28   | 5.58   | 10.1   | 0.29     |
| GAIF01013552.1 | 0      | 0     | 0      | 0      | 0.23   | 0.07     |
| GAIF01013553.1 | 0.13   | 0     | 0      | 0      | 0      | 0        |
| GAIF01013554.1 | 0      | 0     | 0      | 0      | 0.06   | 0        |
| GAIF01013556.1 | 412.65 | 0     | 0.69   | 241.16 | 288.6  | 10694.26 |
| GAIF01013557.1 | 0      | 0.1   | 0      | 0      | 0      | 0        |
| GAIF01013558.1 | 0.04   | 0.05  | 0      | 0.05   | 0.05   | 0        |
| GAIF01013559.1 | 0      | 4.03  | 2.66   | 0      | 0      | 0.52     |
| GAIF01013560.1 | 0.27   | 0.31  | 0.49   | 0.21   | 0      | 0.58     |
| GAIF01013561.1 | 135.23 | 93.98 | 101.63 | 142.88 | 74.78  | 89.32    |
| GAIF01013562.1 | 0      | 0     | 0      | 0.77   | 3.98   | 0        |

|                |         |        |        |        |        |       |
|----------------|---------|--------|--------|--------|--------|-------|
| GAIF01013563.1 | 1.71    | 1.1    | 1.66   | 0.47   | 0.12   | 0.44  |
| GAIF01013564.1 | 96.21   | 178.19 | 233.33 | 175.86 | 351.8  | 58.18 |
| GAIF01013567.1 | 0       | 0      | 0      | 0.12   | 0.24   | 0     |
| GAIF01013569.1 | 13.19   | 19.35  | 6.01   | 35.67  | 57.31  | 24    |
| GAIF01013570.1 | 73.91   | 121.01 | 153.5  | 166.41 | 136.5  | 26.02 |
| GAIF01013571.1 | 43.03   | 89.27  | 110.36 | 32.26  | 40.14  | 45.02 |
| GAIF01013573.1 | 0       | 0      | 0      | 0      | 0.27   | 0     |
| GAIF01013575.1 | 8.93    | 6.89   | 4.75   | 19.4   | 8.66   | 2.86  |
| GAIF01013577.1 | 11.29   | 14     | 12.23  | 3.02   | 1.74   | 0.16  |
| GAIF01013578.1 | 0       | 0      | 0      | 0.68   | 5.2    | 1.51  |
| GAIF01013579.1 | 1.56    | 0.52   | 0.07   | 7.65   | 24.69  | 0.22  |
| GAIF01013580.1 | 0       | 0      | 0      | 0.13   | 0.78   | 0     |
| GAIF01013582.1 | 1.04    | 0.16   | 1.18   | 2.5    | 1.27   | 0.02  |
| GAIF01013584.1 | 0.1     | 0      | 0      | 0      | 0      | 0     |
| GAIF01013585.1 | 0       | 0.23   | 0      | 0.77   | 0.99   | 0     |
| GAIF01013587.1 | 0.1     | 0.04   | 0      | 1.32   | 3.69   | 0.31  |
| GAIF01013588.1 | 5.22    | 0      | 1.12   | 12.35  | 5.91   | 2.03  |
| GAIF01013589.1 | 0.42    | 0      | 0      | 0.39   | 2.53   | 0.19  |
| GAIF01013590.1 | 0.61    | 1.33   | 0.67   | 0.71   | 0.73   | 0     |
| GAIF01013593.1 | 0       | 0      | 0      | 0.06   | 0.74   | 0     |
| GAIF01013594.1 | 0.23    | 0.38   | 0.88   | 0.27   | 0.14   | 0     |
| GAIF01013595.1 | 22.12   | 13.07  | 23.82  | 54.27  | 52.05  | 23.03 |
| GAIF01013596.1 | 3.72    | 2.9    | 4.19   | 5.83   | 4.35   | 2.82  |
| GAIF01013597.1 | 0       | 0      | 0      | 0.14   | 0.5    | 0     |
| GAIF01013598.1 | 2061.31 | 802.65 | 372.73 | 299.2  | 116.34 | 85.87 |
| GAIF01013599.1 | 0.21    | 0.34   | 0      | 0      | 0.11   | 0     |
| GAIF01013601.1 | 3.84    | 4.22   | 2.38   | 1.6    | 1.61   | 0.09  |
| GAIF01013603.1 | 0       | 14.43  | 0      | 6.61   | 6.76   | 4.11  |
| GAIF01013604.1 | 0       | 0.18   | 0      | 0      | 0      | 0.36  |
| GAIF01013605.1 | 0.16    | 0.04   | 0      | 0.73   | 3.02   | 0.09  |
| GAIF01013606.1 | 0       | 0      | 0      | 0      | 0.07   | 0     |
| GAIF01013607.1 | 56.67   | 69.75  | 107.47 | 92.18  | 54.94  | 40    |
| GAIF01013608.1 | 0.3     | 0.11   | 0      | 0.99   | 3.57   | 0.06  |
| GAIF01013609.1 | 0.23    | 0      | 0      | 0.89   | 3.54   | 0.15  |
| GAIF01013610.1 | 0.04    | 0      | 0      | 0      | 0.1    | 0     |
| GAIF01013611.1 | 0       | 0.04   | 0      | 0      | 0.16   | 0     |
| GAIF01013613.1 | 21.03   | 34.98  | 34.97  | 41.1   | 21.67  | 9.41  |
| GAIF01013614.1 | 0       | 0      | 0      | 0      | 0.09   | 0     |
| GAIF01013615.1 | 14.93   | 23.06  | 23.03  | 34.76  | 14.52  | 6.6   |
| GAIF01013616.1 | 0.5     | 0.38   | 0.36   | 6.48   | 32.29  | 0.7   |
| GAIF01013618.1 | 0       | 0      | 0.05   | 0      | 0      | 0     |
| GAIF01013619.1 | 0.63    | 0      | 0      | 0.37   | 0.79   | 0     |
| GAIF01013621.1 | 19.95   | 14.46  | 1.64   | 41.74  | 91.55  | 11.07 |
| GAIF01013623.1 | 8.08    | 4.48   | 8.97   | 26.02  | 26.78  | 14.02 |

|                |       |       |       |       |       |       |
|----------------|-------|-------|-------|-------|-------|-------|
| GAIF01013624.1 | 0.04  | 0     | 0     | 0     | 0     | 0     |
| GAIF01013627.1 | 0.69  | 0.94  | 0.45  | 8.45  | 7.54  | 0     |
| GAIF01013631.1 | 3.11  | 2.25  | 3.27  | 0.9   | 0.08  | 0.14  |
| GAIF01013632.1 | 0.13  | 0     | 0     | 0     | 0     | 0     |
| GAIF01013633.1 | 0.26  | 0     | 0.3   | 0.1   | 0.1   | 0.09  |
| GAIF01013634.1 | 17.39 | 29.73 | 30.02 | 51.82 | 24.25 | 12.06 |
| GAIF01013635.1 | 0.1   | 0.01  | 0.01  | 0.19  | 0.33  | 0.1   |
| GAIF01013639.1 | 0.17  | 0.09  | 0     | 3.44  | 10.31 | 0.1   |
| GAIF01013640.1 | 0     | 0     | 0     | 0     | 0.94  | 0.29  |
| GAIF01013642.1 | 0.39  | 0.08  | 0     | 1.26  | 5.27  | 0.33  |
| GAIF01013643.1 | 0.01  | 0     | 0.01  | 0.15  | 0.27  | 0.07  |
| GAIF01013644.1 | 0.48  | 1.49  | 6.35  | 0.84  | 0.36  | 3.79  |
| GAIF01013645.1 | 0.53  | 0.23  | 0     | 3.67  | 13.89 | 0     |
| GAIF01013646.1 | 1.03  | 0.67  | 0.05  | 6.1   | 20.55 | 0.47  |
| GAIF01013647.1 | 9.23  | 4.95  | 13.13 | 7.32  | 0     | 3.99  |
| GAIF01013648.1 | 0     | 0.09  | 1.06  | 0     | 0     | 0     |
| GAIF01013652.1 | 0     | 0     | 0     | 1.34  | 8.25  | 0     |
| GAIF01013654.1 | 8.15  | 7.87  | 1.43  | 3.25  | 6.27  | 0.5   |
| GAIF01013655.1 | 0     | 0.14  | 0     | 0.08  | 0     | 0.14  |
| GAIF01013656.1 | 35.27 | 51.27 | 67.4  | 35.32 | 21.36 | 26.92 |
| GAIF01013657.1 | 5.32  | 5.44  | 3.43  | 14.15 | 21.62 | 1.38  |
| GAIF01013658.1 | 0     | 0     | 0     | 0     | 0.55  | 0     |
| GAIF01013659.1 | 4.75  | 5.3   | 1.4   | 6.29  | 6.3   | 0.58  |
| GAIF01013662.1 | 0.46  | 0.25  | 0     | 0     | 1.92  | 0     |
| GAIF01013664.1 | 10.57 | 5.26  | 7.85  | 13.58 | 8.2   | 9.11  |
| GAIF01013665.1 | 0.41  | 0.48  | 0.1   | 2.44  | 6.6   | 0.46  |
| GAIF01013667.1 | 15.19 | 15.06 | 3.86  | 3.96  | 3.73  | 0     |
| GAIF01013669.1 | 0     | 0.12  | 0.56  | 0     | 0     | 0.06  |
| GAIF01013670.1 | 27.11 | 18.11 | 17.87 | 47.17 | 38.13 | 31.47 |
| GAIF01013671.1 | 14.73 | 16.79 | 11.09 | 19.44 | 27.14 | 15.19 |
| GAIF01013672.1 | 19.43 | 7.1   | 5.04  | 57.54 | 60.29 | 7.64  |
| GAIF01013673.1 | 1.73  | 0.13  | 0.53  | 0.56  | 0     | 0.4   |
| GAIF01013675.1 | 0.29  | 0.05  | 0.36  | 1.13  | 2.91  | 0.1   |
| GAIF01013676.1 | 11.81 | 4.44  | 6.25  | 13.82 | 10.38 | 9.43  |
| GAIF01013677.1 | 19.53 | 15.55 | 7.91  | 25.41 | 42.45 | 90.5  |
| GAIF01013678.1 | 0.15  | 0.08  | 0     | 0     | 0     | 0.08  |
| GAIF01013679.1 | 0     | 0     | 0.07  | 0.21  | 0.36  | 0     |
| GAIF01013681.1 | 0.08  | 0     | 0     | 0.36  | 0.53  | 0.14  |
| GAIF01013682.1 | 0     | 0     | 0     | 0     | 4.29  | 0     |
| GAIF01013683.1 | 0.05  | 0     | 0.06  | 0.06  | 0.56  | 0     |
| GAIF01013684.1 | 0     | 0     | 0     | 0.11  | 0.27  | 0     |
| GAIF01013685.1 | 0     | 0     | 0     | 0.24  | 0.55  | 0     |
| GAIF01013686.1 | 0.02  | 0.01  | 0.04  | 0.08  | 0.08  | 0.07  |
| GAIF01013687.1 | 0     | 0     | 0     | 0.16  | 1.99  | 0.3   |

|                |        |        |        |        |        |       |
|----------------|--------|--------|--------|--------|--------|-------|
| GAIF01013688.1 | 0.03   | 0.01   | 0      | 0.02   | 0.03   | 0     |
| GAIF01013691.1 | 5.56   | 3.75   | 2.39   | 6.91   | 10.69  | 6.64  |
| GAIF01013693.1 | 0      | 0      | 0      | 3.21   | 9.66   | 1.76  |
| GAIF01013694.1 | 0.14   | 0      | 0      | 0.56   | 0.33   | 0.08  |
| GAIF01013695.1 | 0      | 0      | 0      | 0      | 0.68   | 11.38 |
| GAIF01013696.1 | 0.45   | 0.12   | 0      | 3.27   | 0      | 0     |
| GAIF01013697.1 | 0      | 0      | 0      | 0      | 0.29   | 0.07  |
| GAIF01013698.1 | 0.05   | 0.06   | 0      | 0.69   | 3.73   | 0.12  |
| GAIF01013699.1 | 12.69  | 18.91  | 8.19   | 5.86   | 4.38   | 0.51  |
| GAIF01013700.1 | 0      | 0.13   | 0      | 0.13   | 0      | 0     |
| GAIF01013701.1 | 0      | 0      | 0      | 0.43   | 3.4    | 0     |
| GAIF01013702.1 | 9.71   | 17.03  | 9.11   | 32.72  | 32.87  | 2.28  |
| GAIF01013704.1 | 0      | 0      | 0.03   | 0      | 0      | 0     |
| GAIF01013705.1 | 0.1    | 0.15   | 0      | 0.12   | 0.16   | 0     |
| GAIF01013707.1 | 1.76   | 1.33   | 0.27   | 0.23   | 0.59   | 0     |
| GAIF01013709.1 | 9.3    | 3.59   | 2.9    | 10.32  | 13.51  | 7.25  |
| GAIF01013711.1 | 0.59   | 0.16   | 0      | 3.43   | 10.56  | 0     |
| GAIF01013712.1 | 10.62  | 9.25   | 16.42  | 18.77  | 13.98  | 13.51 |
| GAIF01013713.1 | 14.7   | 15.36  | 12.14  | 46.31  | 65.18  | 6.16  |
| GAIF01013714.1 | 4.72   | 0.83   | 0.09   | 0      | 1.47   | 4.66  |
| GAIF01013716.1 | 0.12   | 0.7    | 0      | 0      | 0.14   | 0     |
| GAIF01013718.1 | 2.76   | 3.57   | 1.05   | 30.16  | 54.21  | 0.82  |
| GAIF01013719.1 | 0.37   | 0      | 0      | 0.32   | 0.77   | 0.1   |
| GAIF01013720.1 | 12.07  | 20.47  | 17.25  | 41.12  | 36.03  | 7.15  |
| GAIF01013722.1 | 17.95  | 10.29  | 5.95   | 34.24  | 11.41  | 11.19 |
| GAIF01013723.1 | 0      | 0      | 0      | 0.22   | 1.86   | 0     |
| GAIF01013724.1 | 0.29   | 0      | 0      | 0.17   | 0.17   | 0     |
| GAIF01013727.1 | 0      | 0.05   | 0.05   | 0.48   | 1.81   | 0     |
| GAIF01013728.1 | 51.13  | 38.25  | 46.39  | 3.27   | 0.56   | 0.56  |
| GAIF01013730.1 | 0.24   | 0      | 0      | 0.04   | 0.11   | 0.1   |
| GAIF01013731.1 | 26.58  | 12.42  | 6.2    | 27.82  | 44.4   | 2.97  |
| GAIF01013734.1 | 0      | 0.04   | 0      | 0.14   | 0.24   | 0     |
| GAIF01013735.1 | 2.33   | 1.81   | 1.46   | 0.96   | 1.4    | 0.43  |
| GAIF01013736.1 | 0.69   | 0.15   | 0      | 3.05   | 11.23  | 0.84  |
| GAIF01013737.1 | 2.86   | 8.2    | 2.69   | 0      | 0      | 0.88  |
| GAIF01013738.1 | 172.16 | 134.42 | 76.53  | 235    | 205.57 | 105.6 |
| GAIF01013739.1 | 0.08   | 0      | 0      | 0.68   | 2.6    | 1.28  |
| GAIF01013741.1 | 0      | 0      | 0      | 2.1    | 6.02   | 0.12  |
| GAIF01013742.1 | 1.98   | 0.76   | 0.64   | 1.39   | 1.26   | 0.9   |
| GAIF01013743.1 | 1.24   | 0      | 0      | 1.1    | 11.91  | 0     |
| GAIF01013744.1 | 7.38   | 7.05   | 14.49  | 4.67   | 2.42   | 6.9   |
| GAIF01013745.1 | 22.67  | 10.47  | 0.79   | 5.19   | 2.05   | 0     |
| GAIF01013746.1 | 34.67  | 37.99  | 22.16  | 35.51  | 22.26  | 3.05  |
| GAIF01013747.1 | 375.09 | 105    | 158.44 | 285.51 | 80.51  | 698.5 |



|                |        |        |        |        |        |        |
|----------------|--------|--------|--------|--------|--------|--------|
| GAIF01013750.1 | 246.26 | 126.35 | 84.17  | 261.33 | 162.65 | 29.78  |
| GAIF01013751.1 | 0      | 0      | 0.04   | 0.05   | 0      | 0      |
| GAIF01013752.1 | 496.18 | 333.41 | 388.44 | 714.9  | 278.47 | 145.98 |
| GAIF01013753.1 | 8.82   | 6.4    | 2.42   | 53.28  | 78.31  | 2.27   |
| GAIF01013755.1 | 0      | 0.26   | 0.26   | 0      | 0.04   | 0.26   |
| GAIF01013758.1 | 32.16  | 39.51  | 53.48  | 68.29  | 49.48  | 71.41  |
| GAIF01013761.1 | 0      | 0.1    | 0      | 0.11   | 0.11   | 0      |
| GAIF01013763.1 | 0.08   | 0      | 0      | 0      | 0      | 0      |
| GAIF01013764.1 | 0      | 0      | 0      | 0.1    | 0.06   | 0      |
| GAIF01013765.1 | 139.63 | 180.06 | 128.03 | 165.37 | 57.46  | 103.2  |
| GAIF01013766.1 | 9.82   | 16.01  | 10.68  | 29.91  | 36.56  | 3.02   |
| GAIF01013767.1 | 54.35  | 51.89  | 34.97  | 37.2   | 30.25  | 11.98  |
| GAIF01013769.1 | 1.19   | 0.8    | 0.41   | 2      | 4.35   | 0.05   |
| GAIF01013770.1 | 0.95   | 1.76   | 0.3    | 5.53   | 16.53  | 0.04   |
| GAIF01013771.1 | 2.74   | 0.73   | 0.77   | 1.42   | 3.13   | 0.56   |
| GAIF01013772.1 | 0      | 1.92   | 5.52   | 0.1    | 0.21   | 1.75   |
| GAIF01013773.1 | 89.48  | 48.58  | 73.21  | 289.94 | 571.55 | 805.56 |
| GAIF01013775.1 | 42.07  | 126.5  | 230.54 | 296.6  | 255.6  | 208.6  |
| GAIF01013777.1 | 1.15   | 0.56   | 0.13   | 4.02   | 9.29   | 0.06   |
| GAIF01013778.1 | 0      | 0      | 0      | 0      | 0      | 0.34   |
| GAIF01013779.1 | 10.24  | 2.16   | 2.31   | 3.52   | 2.11   | 2.7    |
| GAIF01013780.1 | 7.53   | 43.02  | 48.23  | 15.75  | 20.11  | 14.3   |
| GAIF01013784.1 | 0      | 0.47   | 0.81   | 0.52   | 0.7    | 0.62   |
| GAIF01013785.1 | 5.7    | 5.49   | 4.06   | 1.09   | 0      | 0      |
| GAIF01013786.1 | 66.06  | 27.02  | 30.83  | 84.25  | 104.28 | 42.07  |
| GAIF01013787.1 | 0      | 0.36   | 0.95   | 0      | 0      | 0.07   |
| GAIF01013788.1 | 0.44   | 0.39   | 0      | 0.54   | 2.37   | 0.81   |
| GAIF01013789.1 | 61.2   | 50.66  | 45.7   | 102.7  | 57.69  | 23.24  |
| GAIF01013790.1 | 0.63   | 0.23   | 1.15   | 0.24   | 0.25   | 1.16   |
| GAIF01013791.1 | 0.29   | 0.16   | 0.16   | 0.85   | 2.46   | 0.16   |
| GAIF01013793.1 | 0.08   | 0      | 0      | 0.15   | 0.13   | 0.03   |
| GAIF01013795.1 | 0      | 0      | 0      | 0.59   | 0      | 0      |
| GAIF01013796.1 | 0.08   | 0      | 0      | 0.08   | 0.74   | 0.03   |
| GAIF01013798.1 | 0.66   | 0      | 0.41   | 1.53   | 5.08   | 0.21   |
| GAIF01013800.1 | 0      | 0      | 0      | 0.12   | 0.44   | 0.06   |
| GAIF01013801.1 | 8.78   | 3.06   | 0.96   | 21.25  | 57.24  | 8.42   |
| GAIF01013802.1 | 1.29   | 4.59   | 1.04   | 1.2    | 6.63   | 0.38   |
| GAIF01013804.1 | 0      | 0      | 0.58   | 2.64   | 3.87   | 0      |
| GAIF01013805.1 | 0      | 0      | 0      | 0      | 0.97   | 0      |
| GAIF01013809.1 | 33.76  | 52.59  | 14.33  | 17.1   | 16.18  | 1.53   |
| GAIF01013810.1 | 6.2    | 7.05   | 9.12   | 18.97  | 19.74  | 33.53  |
| GAIF01013812.1 | 0      | 0      | 0      | 0      | 0      | 0.07   |
| GAIF01013813.1 | 0      | 0      | 0      | 0.05   | 0      | 0      |
| GAIF01013814.1 | 2.08   | 1.75   | 2      | 2.21   | 4.38   | 5.83   |

|                |        |        |        |        |        |         |
|----------------|--------|--------|--------|--------|--------|---------|
| GAIF01013815.1 | 0.12   | 0.13   | 0.13   | 0.55   | 0.43   | 0       |
| GAIF01013816.1 | 0      | 0.12   | 0      | 0      | 0.07   | 0       |
| GAIF01013817.1 | 19.52  | 13.96  | 13.98  | 86.02  | 133.78 | 14.49   |
| GAIF01013818.1 | 0.16   | 0.17   | 0.07   | 0.18   | 1.98   | 0.1     |
| GAIF01013819.1 | 26.94  | 37.26  | 22.26  | 93.18  | 106.37 | 5.98    |
| GAIF01013821.1 | 0.42   | 0.23   | 0      | 0.25   | 0.13   | 0.12    |
| GAIF01013823.1 | 1.13   | 0.56   | 0.26   | 1.2    | 1.19   | 0.1     |
| GAIF01013824.1 | 0      | 0.03   | 0      | 0.59   | 3.22   | 0.03    |
| GAIF01013825.1 | 12.04  | 11.28  | 6.45   | 28.29  | 25.23  | 3.53    |
| GAIF01013827.1 | 0.89   | 0.55   | 0.21   | 8.58   | 75.73  | 0.51    |
| GAIF01013828.1 | 109.4  | 69.05  | 77.78  | 56.4   | 19.98  | 52.67   |
| GAIF01013829.1 | 0.08   | 0      | 0.16   | 0.46   | 3.54   | 0.16    |
| GAIF01013831.1 | 0      | 0.29   | 0.76   | 0      | 0.06   | 0       |
| GAIF01013832.1 | 0      | 0      | 0      | 0      | 0.48   | 0       |
| GAIF01013833.1 | 26.58  | 18.93  | 14.11  | 39.59  | 51.89  | 55.33   |
| GAIF01013834.1 | 51.94  | 74.29  | 48.67  | 83.37  | 44.86  | 16.77   |
| GAIF01013835.1 | 0.09   | 0      | 0      | 0      | 0      | 0       |
| GAIF01013837.1 | 0      | 0      | 0.23   | 0      | 0      | 0       |
| GAIF01013839.1 | 16.56  | 9.35   | 9.13   | 14.3   | 7.39   | 8.34    |
| GAIF01013844.1 | 0.22   | 0      | 0      | 0.51   | 2.65   | 0       |
| GAIF01013846.1 | 0.03   | 0      | 0.08   | 0.6    | 2.64   | 0.04    |
| GAIF01013847.1 | 1.13   | 0.33   | 0.2    | 5.02   | 18.41  | 0.77    |
| GAIF01013848.1 | 4.05   | 5.91   | 1.52   | 18.79  | 36.76  | 1.06    |
| GAIF01013850.1 | 0.69   | 0      | 0.64   | 3.51   | 7.75   | 41.19   |
| GAIF01013852.1 | 87.89  | 50     | 89.32  | 197.27 | 144.42 | 227.65  |
| GAIF01013853.1 | 0      | 3.15   | 0      | 4.23   | 11.72  | 1.45    |
| GAIF01013855.1 | 0.95   | 0      | 0      | 2.18   | 2.92   | 0       |
| GAIF01013856.1 | 8.72   | 19.38  | 8.8    | 32.97  | 34.48  | 3.7     |
| GAIF01013858.1 | 0.1    | 0.05   | 0      | 0      | 0.54   | 0       |
| GAIF01013859.1 | 0.8    | 0.65   | 0      | 1.16   | 3.51   | 0       |
| GAIF01013861.1 | 0.14   | 0      | 0      | 0.17   | 0      | 0       |
| GAIF01013862.1 | 1.35   | 1.77   | 1.71   | 2.83   | 2.23   | 0.45    |
| GAIF01013863.1 | 4.15   | 2.13   | 2.93   | 10.04  | 11.1   | 12.34   |
| GAIF01013864.1 | 18.21  | 16.08  | 23.76  | 45.89  | 31.96  | 7.32    |
| GAIF01013865.1 | 0.2    | 0.32   | 0.32   | 0      | 0.12   | 0       |
| GAIF01013867.1 | 0      | 0.17   | 0      | 0      | 0.49   | 0       |
| GAIF01013869.1 | 0      | 0      | 0      | 0      | 0      | 0.09    |
| GAIF01013871.1 | 5.38   | 8.38   | 7.51   | 1.01   | 0.17   | 0       |
| GAIF01013872.1 | 0.96   | 1.96   | 1.98   | 2.52   | 0.87   | 1.86    |
| GAIF01013874.1 | 0      | 0      | 0      | 0.23   | 0.48   | 0.22    |
| GAIF01013875.1 | 599.91 | 530.86 | 374.32 | 467.48 | 597.27 | 1197.67 |
| GAIF01013879.1 | 9.96   | 19.96  | 16.47  | 44.17  | 15.08  | 7.16    |
| GAIF01013880.1 | 46.24  | 24.84  | 9.97   | 52.25  | 41.72  | 5.51    |
| GAIF01013882.1 | 2.72   | 3.59   | 1.14   | 1.94   | 4.62   | 0.91    |

|                |        |        |        |       |        |        |
|----------------|--------|--------|--------|-------|--------|--------|
| GAIF01013883.1 | 0      | 0      | 0      | 0     | 0.09   | 0      |
| GAIF01013884.1 | 0.22   | 0.15   | 0      | 0.39  | 0      | 0.09   |
| GAIF01013885.1 | 0      | 1.98   | 1.33   | 0     | 0      | 0.13   |
| GAIF01013886.1 | 0.62   | 0.1    | 0      | 3.53  | 13.99  | 1.18   |
| GAIF01013887.1 | 0.33   | 0.05   | 0      | 0.16  | 0.23   | 0      |
| GAIF01013888.1 | 0.69   | 0.8    | 0.54   | 10.34 | 1.07   | 1.57   |
| GAIF01013890.1 | 1.11   | 0.15   | 0.11   | 0.31  | 0.33   | 0.59   |
| GAIF01013891.1 | 17.54  | 15.73  | 34.02  | 41.48 | 37.72  | 21.4   |
| GAIF01013893.1 | 4.17   | 3.21   | 0.67   | 26.69 | 46.98  | 23.77  |
| GAIF01013894.1 | 0.01   | 0      | 0      | 0     | 0      | 0      |
| GAIF01013895.1 | 0.2    | 1.46   | 0      | 2.81  | 11.1   | 0.8    |
| GAIF01013896.1 | 20.08  | 34.94  | 39.83  | 14.9  | 7.21   | 7.11   |
| GAIF01013897.1 | 0.83   | 0.43   | 0.31   | 5.17  | 17.1   | 0.34   |
| GAIF01013899.1 | 0.06   | 0      | 0      | 0.15  | 0      | 0      |
| GAIF01013900.1 | 35.96  | 17.53  | 15.43  | 92.5  | 124.67 | 20.04  |
| GAIF01013901.1 | 0.1    | 0.04   | 0      | 0.11  | 0.2    | 0      |
| GAIF01013902.1 | 0      | 0      | 0      | 0     | 0.03   | 0      |
| GAIF01013903.1 | 28.91  | 35.99  | 35.88  | 24.6  | 17.78  | 20.92  |
| GAIF01013904.1 | 10.94  | 4.49   | 0      | 40.81 | 98.81  | 27.62  |
| GAIF01013906.1 | 8.45   | 5.73   | 3.8    | 40.75 | 17.06  | 4.42   |
| GAIF01013907.1 | 0.88   | 0.03   | 1.82   | 2.69  | 5.36   | 1.15   |
| GAIF01013908.1 | 0      | 0      | 0      | 0.41  | 0.49   | 0      |
| GAIF01013909.1 | 146.17 | 156.6  | 212.55 | 128.9 | 93.5   | 124.66 |
| GAIF01013910.1 | 0.06   | 0      | 0.04   | 0     | 0.08   | 0      |
| GAIF01013911.1 | 17.36  | 9.51   | 8.49   | 19.19 | 31.66  | 22.12  |
| GAIF01013912.1 | 0.09   | 0      | 0.94   | 0     | 0      | 0.09   |
| GAIF01013913.1 | 0.23   | 0      | 0      | 0.14  | 0      | 0      |
| GAIF01013914.1 | 0.31   | 0      | 0      | 0     | 0.05   | 0.08   |
| GAIF01013915.1 | 0.18   | 0      | 0.17   | 0     | 0      | 0      |
| GAIF01013918.1 | 0.1    | 0.22   | 0.11   | 0.23  | 0.06   | 0.17   |
| GAIF01013921.1 | 0.22   | 0.08   | 0      | 1.08  | 5.45   | 0.16   |
| GAIF01013922.1 | 2.2    | 0.12   | 0      | 2.94  | 12.57  | 5.46   |
| GAIF01013925.1 | 1.22   | 0.59   | 0.89   | 4.07  | 1.46   | 0.6    |
| GAIF01013926.1 | 0      | 0      | 0.31   | 0.22  | 0.11   | 0      |
| GAIF01013927.1 | 222.35 | 120.63 | 118.35 | 123.1 | 42.57  | 26.78  |
| GAIF01013928.1 | 2.63   | 5.22   | 6.15   | 4.51  | 3.58   | 1.51   |
| GAIF01013930.1 | 1.47   | 2.58   | 2.47   | 0.14  | 1.32   | 0.28   |
| GAIF01013931.1 | 0.11   | 0      | 0      | 0.53  | 0.27   | 0.12   |
| GAIF01013932.1 | 0      | 0      | 0.71   | 0.37  | 0      | 0.09   |
| GAIF01013933.1 | 7.61   | 7.47   | 2.41   | 17.9  | 22.54  | 0      |
| GAIF01013934.1 | 10.22  | 13.16  | 47.46  | 24.95 | 15.4   | 33.01  |
| GAIF01013935.1 | 11.17  | 9      | 5.73   | 1.9   | 11.65  | 5.26   |
| GAIF01013936.1 | 17.32  | 26.65  | 21.65  | 24.05 | 17.22  | 6.94   |
| GAIF01013937.1 | 25.53  | 30.37  | 12.22  | 57.65 | 60     | 18.09  |

|                |        |        |       |        |        |        |
|----------------|--------|--------|-------|--------|--------|--------|
| GAIF01013938.1 | 0      | 0.7    | 0     | 1.75   | 7.2    | 0.66   |
| GAIF01013939.1 | 0.04   | 0.08   | 0.08  | 0.31   | 2.14   | 0.04   |
| GAIF01013941.1 | 0.27   | 0.14   | 0.73  | 0      | 0.16   | 0.07   |
| GAIF01013942.1 | 12.84  | 19.19  | 7.14  | 39.12  | 38.7   | 2.04   |
| GAIF01013943.1 | 0.19   | 0.06   | 0.06  | 0.34   | 0.86   | 0.08   |
| GAIF01013944.1 | 44.56  | 38.55  | 12.97 | 42.35  | 48.46  | 3.55   |
| GAIF01013945.1 | 9.92   | 10.68  | 7.62  | 30.85  | 17.41  | 6.82   |
| GAIF01013946.1 | 0.35   | 0.16   | 0.05  | 1.27   | 8.48   | 0.66   |
| GAIF01013947.1 | 0.16   | 0      | 0.18  | 0      | 0.19   | 0      |
| GAIF01013949.1 | 27.73  | 23.33  | 49.28 | 30.73  | 18.97  | 41.27  |
| GAIF01013950.1 | 205.84 | 171.91 | 75.95 | 55.45  | 45.94  | 60.69  |
| GAIF01013952.1 | 0      | 0      | 0.13  | 0      | 0      | 0.39   |
| GAIF01013953.1 | 4.65   | 1.54   | 2.15  | 5.09   | 3.41   | 4.53   |
| GAIF01013955.1 | 1.21   | 0.1    | 0.1   | 1.08   | 2.13   | 0.41   |
| GAIF01013957.1 | 0.7    | 0.12   | 0.69  | 1.51   | 1.57   | 0.13   |
| GAIF01013958.1 | 25.23  | 46.09  | 11.85 | 45.37  | 93.21  | 4.76   |
| GAIF01013960.1 | 25.9   | 12.16  | 4.72  | 67.36  | 52.82  | 8.6    |
| GAIF01013963.1 | 0.86   | 0.29   | 0.94  | 0      | 0      | 0      |
| GAIF01013964.1 | 104.08 | 34.28  | 21.8  | 118.86 | 150.79 | 35.45  |
| GAIF01013965.1 | 0      | 0      | 0     | 0.23   | 0.35   | 0      |
| GAIF01013966.1 | 0.77   | 1.32   | 1.13  | 0.6    | 0.62   | 1.98   |
| GAIF01013967.1 | 0.47   | 0.2    | 0.41  | 0.54   | 3.14   | 0      |
| GAIF01013968.1 | 0.72   | 0.33   | 0     | 4.47   | 21.35  | 0.13   |
| GAIF01013969.1 | 217.76 | 112.57 | 36.77 | 210.71 | 560.76 | 104.41 |
| GAIF01013970.1 | 0.36   | 0      | 0     | 0.28   | 4.35   | 0.53   |
| GAIF01013971.1 | 0      | 0      | 0     | 0      | 5.53   | 0      |
| GAIF01013973.1 | 0.31   | 0.43   | 0.36  | 0.75   | 1.11   | 0.09   |
| GAIF01013974.1 | 0.13   | 0.28   | 0     | 0      | 0      | 0      |
| GAIF01013975.1 | 1.48   | 0      | 0     | 5.92   | 15.68  | 1.27   |
| GAIF01013976.1 | 0.03   | 0.29   | 0.1   | 0.42   | 0.33   | 0.19   |
| GAIF01013977.1 | 0.16   | 0      | 0     | 0.49   | 2.04   | 0      |
| GAIF01013978.1 | 0.26   | 0      | 0     | 0      | 0      | 0.5    |
| GAIF01013979.1 | 0.3    | 0      | 0     | 2.07   | 6.99   | 0.49   |
| GAIF01013980.1 | 5.31   | 3.26   | 1.34  | 21.29  | 18.1   | 0      |
| GAIF01013981.1 | 0.92   | 0.5    | 1.1   | 0.54   | 2.68   | 0.51   |
| GAIF01013982.1 | 0      | 0      | 0     | 0.08   | 0      | 0.08   |
| GAIF01013984.1 | 0      | 0.15   | 0     | 0      | 0      | 0      |
| GAIF01013987.1 | 0.49   | 0.53   | 0     | 0      | 0.19   | 0      |
| GAIF01013988.1 | 0      | 0      | 0     | 0      | 0      | 0.22   |
| GAIF01013990.1 | 0      | 0.47   | 0     | 0      | 0.25   | 0      |
| GAIF01013993.1 | 147.34 | 92.94  | 40.39 | 60.59  | 93.52  | 28.71  |
| GAIF01013995.1 | 5.4    | 9.43   | 5.15  | 17.09  | 8.14   | 2.24   |
| GAIF01013997.1 | 45.05  | 42.76  | 32.82 | 107.58 | 48.29  | 18.65  |
| GAIF01013998.1 | 0      | 0.05   | 0.21  | 1.48   | 1.54   | 0.14   |

|                |       |       |       |        |        |       |
|----------------|-------|-------|-------|--------|--------|-------|
| GAIF01013999.1 | 44.08 | 51.71 | 29.42 | 88.93  | 51.88  | 13.14 |
| GAIF01014000.1 | 0.06  | 0.14  | 0.07  | 0.33   | 0.3    | 0     |
| GAIF01014002.1 | 0     | 0     | 0     | 0      | 2.48   | 0     |
| GAIF01014003.1 | 0     | 0     | 0.07  | 0      | 0      | 0     |
| GAIF01014006.1 | 13.11 | 14.26 | 43.19 | 0      | 0      | 0     |
| GAIF01014009.1 | 3.02  | 4.64  | 3.16  | 2.9    | 2.18   | 0.34  |
| GAIF01014011.1 | 0     | 0     | 0     | 0      | 0.12   | 0     |
| GAIF01014013.1 | 62.39 | 40.54 | 19.4  | 185.46 | 410.66 | 64.34 |
| GAIF01014014.1 | 0.15  | 0     | 0     | 0      | 0      | 0     |
| GAIF01014015.1 | 0     | 0     | 0     | 0.35   | 0.19   | 0     |
| GAIF01014016.1 | 0     | 0     | 0.4   | 0      | 2.06   | 0     |
| GAIF01014018.1 | 45.29 | 28.95 | 25.44 | 108.51 | 124.04 | 27.49 |
| GAIF01014020.1 | 0     | 0     | 0     | 0      | 0.52   | 0     |
| GAIF01014021.1 | 23.29 | 27.33 | 38.66 | 39.58  | 13.45  | 14.87 |
| GAIF01014022.1 | 0     | 0     | 0     | 2.32   | 8.79   | 0.31  |
| GAIF01014023.1 | 0.12  | 0     | 0.51  | 0.13   | 0      | 0     |
| GAIF01014024.1 | 0     | 0     | 0.1   | 0.61   | 2.26   | 0.1   |
| GAIF01014025.1 | 10.2  | 6.9   | 4.58  | 21.41  | 13.44  | 7.72  |
| GAIF01014026.1 | 0.2   | 0.06  | 0.4   | 0.28   | 0.15   | 0     |
| GAIF01014027.1 | 0.34  | 0.37  | 0.38  | 0.4    | 2.27   | 1.32  |
| GAIF01014028.1 | 0.88  | 0     | 0     | 2.21   | 8.65   | 12.29 |
| GAIF01014029.1 | 4.82  | 12.88 | 8.91  | 3.48   | 2.11   | 0.08  |
| GAIF01014030.1 | 16.78 | 19.1  | 27.73 | 24.05  | 11.87  | 20.12 |
| GAIF01014031.1 | 0.05  | 0     | 0.29  | 2.52   | 6.44   | 0.12  |
| GAIF01014033.1 | 0     | 0.09  | 0     | 0      | 0      | 0     |
| GAIF01014034.1 | 77.52 | 47.98 | 47.86 | 87.72  | 56.04  | 44.49 |
| GAIF01014035.1 | 0.14  | 0     | 0     | 1.43   | 6.73   | 0     |
| GAIF01014036.1 | 0.19  | 0.03  | 0.04  | 0.04   | 0.39   | 0.28  |
| GAIF01014037.1 | 0.11  | 0     | 0.12  | 0.34   | 0.53   | 0     |
| GAIF01014038.1 | 0     | 0     | 0     | 0      | 0.72   | 0     |
| GAIF01014039.1 | 28.88 | 30.66 | 15.71 | 96.9   | 78.94  | 9.36  |
| GAIF01014041.1 | 0.24  | 0.92  | 0.93  | 1.68   | 4.65   | 1.06  |
| GAIF01014042.1 | 20.66 | 21.74 | 12.69 | 21.82  | 15.26  | 3.95  |
| GAIF01014043.1 | 0.35  | 0     | 0     | 1.79   | 0.38   | 0     |
| GAIF01014045.1 | 23.73 | 22.31 | 5.85  | 108.63 | 136.99 | 8.39  |
| GAIF01014046.1 | 1.23  | 0.56  | 0.19  | 2.26   | 6.11   | 0     |
| GAIF01014048.1 | 28.74 | 18.02 | 16.63 | 49.27  | 68.36  | 30.91 |
| GAIF01014049.1 | 0     | 14.05 | 57.3  | 0.36   | 0.75   | 42.14 |
| GAIF01014051.1 | 1.19  | 1.18  | 1.67  | 1.81   | 0.22   | 1.33  |
| GAIF01014052.1 | 0     | 0     | 0     | 0.13   | 0      | 0     |
| GAIF01014053.1 | 9.36  | 11.51 | 4.92  | 19.84  | 35.74  | 1.5   |
| GAIF01014055.1 | 1.93  | 1.4   | 2.21  | 5.74   | 9.66   | 2.75  |
| GAIF01014057.1 | 9.93  | 21.64 | 9.96  | 25.46  | 39.96  | 0.26  |
| GAIF01014058.1 | 0.04  | 0.05  | 0     | 0.3    | 0.99   | 0     |

|                |         |         |         |        |         |         |
|----------------|---------|---------|---------|--------|---------|---------|
| GAIF01014059.1 | 4.08    | 5.14    | 0.6     | 4.44   | 1.56    | 0       |
| GAIF01014060.1 | 0       | 0       | 0       | 0      | 0.26    | 0       |
| GAIF01014061.1 | 6.48    | 4.16    | 6.3     | 4.81   | 5.24    | 2.81    |
| GAIF01014063.1 | 4.71    | 0       | 0       | 9.67   | 23.06   | 23.13   |
| GAIF01014064.1 | 0       | 0.33    | 0       | 1.1    | 2.79    | 0.11    |
| GAIF01014066.1 | 94.04   | 96.06   | 45.67   | 171.73 | 149.78  | 11.57   |
| GAIF01014067.1 | 6.45    | 8.47    | 5.62    | 25.28  | 25.99   | 2.01    |
| GAIF01014070.1 | 0       | 0.28    | 0       | 1.73   | 7.05    | 0.51    |
| GAIF01014072.1 | 0       | 0       | 0       | 0      | 0.88    | 0       |
| GAIF01014073.1 | 0.06    | 0.24    | 0.06    | 0.06   | 0       | 0.06    |
| GAIF01014074.1 | 5.01    | 2.99    | 0.3     | 49.07  | 136.36  | 7.54    |
| GAIF01014075.1 | 3717.09 | 1869.71 | 1745.82 | 2207   | 2797.26 | 8166.96 |
| GAIF01014078.1 | 0.52    | 0.45    | 0.26    | 0.12   | 0       | 0.04    |
| GAIF01014079.1 | 82.33   | 65.26   | 53.62   | 7.88   | 0.39    | 0.01    |
| GAIF01014080.1 | 0.8     | 0.72    | 0.08    | 4.67   | 8.97    | 0.24    |
| GAIF01014081.1 | 6       | 10.64   | 3.52    | 1.69   | 1.61    | 0.19    |
| GAIF01014082.1 | 13.28   | 15.57   | 20.14   | 54.53  | 48.95   | 12.61   |
| GAIF01014085.1 | 50.39   | 31.44   | 3.32    | 4.33   | 21.77   | 3.13    |
| GAIF01014086.1 | 2.47    | 0.28    | 0.14    | 0      | 0.16    | 0       |
| GAIF01014091.1 | 1.16    | 1.5     | 0.08    | 9.45   | 14.51   | 0.08    |
| GAIF01014092.1 | 37.95   | 45.6    | 28.5    | 133.33 | 49.86   | 15.09   |
| GAIF01014093.1 | 0.33    | 0.47    | 0.48    | 1.01   | 3.13    | 2.27    |
| GAIF01014094.1 | 7.33    | 14.02   | 4.69    | 0.94   | 3.6     | 0       |
| GAIF01014095.1 | 0       | 0       | 0       | 0      | 0.37    | 0       |
| GAIF01014096.1 | 13.54   | 7.58    | 14.25   | 12.78  | 5.51    | 11.92   |
| GAIF01014098.1 | 0       | 0       | 0       | 0      | 0       | 0.04    |
| GAIF01014100.1 | 0.07    | 0.21    | 0       | 0.94   | 2.9     | 0       |
| GAIF01014101.1 | 0.1     | 0       | 0       | 0      | 0.6     | 0       |
| GAIF01014102.1 | 4.31    | 6.5     | 5.21    | 14.02  | 2.59    | 1.93    |
| GAIF01014103.1 | 108.43  | 44.95   | 65.34   | 7.34   | 9.05    | 6.68    |
| GAIF01014105.1 | 0       | 0.12    | 0.37    | 0      | 0       | 0       |
| GAIF01014107.1 | 0       | 0       | 0.21    | 0      | 0       | 0       |
| GAIF01014108.1 | 38      | 29.03   | 37.48   | 18.47  | 14.22   | 16.84   |
| GAIF01014109.1 | 137.71  | 130.53  | 116.93  | 89.53  | 51.02   | 20.43   |
| GAIF01014111.1 | 0.63    | 0.89    | 0.5     | 0.47   | 0.05    | 0.1     |
| GAIF01014112.1 | 1.79    | 1.7     | 1.33    | 3.82   | 5.46    | 8.76    |
| GAIF01014114.1 | 1.5     | 0.38    | 0.87    | 0.82   | 0.43    | 0.49    |
| GAIF01014115.1 | 31.24   | 17.82   | 18      | 56.24  | 69.76   | 42.95   |
| GAIF01014116.1 | 0.18    | 0.58    | 0       | 0      | 0.21    | 0       |
| GAIF01014118.1 | 0.84    | 2.75    | 0.46    | 2.94   | 3.25    | 0.14    |
| GAIF01014119.1 | 0.09    | 0.17    | 0       | 0      | 0       | 0.62    |
| GAIF01014120.1 | 913.64  | 1075.29 | 847.84  | 581.66 | 418.88  | 327.23  |
| GAIF01014121.1 | 1.1     | 0.27    | 0.18    | 4.3    | 18.3    | 0.86    |
| GAIF01014122.1 | 0       | 0       | 0.21    | 0      | 0       | 0       |

|                |         |         |         |         |         |         |
|----------------|---------|---------|---------|---------|---------|---------|
| GAIF01014124.1 | 0.22    | 0       | 0       | 0       | 1.06    | 0       |
| GAIF01014125.1 | 0       | 0       | 0.07    | 5.67    | 17.74   | 0.75    |
| GAIF01014126.1 | 5.46    | 4.04    | 6.05    | 17.43   | 70.33   | 2.65    |
| GAIF01014129.1 | 22.01   | 17.44   | 4.39    | 24.87   | 32.39   | 1.66    |
| GAIF01014130.1 | 0.13    | 0       | 0       | 0.15    | 0.47    | 0       |
| GAIF01014131.1 | 0.09    | 0.15    | 0.05    | 0       | 0       | 0       |
| GAIF01014132.1 | 0       | 0       | 0       | 0       | 0.18    | 0       |
| GAIF01014133.1 | 28.98   | 24.44   | 12.66   | 10.13   | 5.67    | 1.12    |
| GAIF01014136.1 | 0       | 0.14    | 0.57    | 0.3     | 0.62    | 0.14    |
| GAIF01014138.1 | 0       | 0.23    | 0.08    | 0       | 0       | 0.24    |
| GAIF01014139.1 | 19.29   | 19.78   | 5.9     | 79.37   | 79.3    | 10.23   |
| GAIF01014140.1 | 8.91    | 16.98   | 43.3    | 46.87   | 53.81   | 21.7    |
| GAIF01014141.1 | 229.65  | 78.06   | 137.92  | 181.01  | 247.56  | 115.78  |
| GAIF01014142.1 | 0.33    | 0.82    | 0.56    | 0.99    | 1.18    | 0.25    |
| GAIF01014143.1 | 15.33   | 12.21   | 10.96   | 35.65   | 61.58   | 5.02    |
| GAIF01014144.1 | 9.34    | 9.36    | 11.64   | 19.59   | 24.31   | 7.15    |
| GAIF01014145.1 | 38.58   | 12.05   | 19.92   | 27.73   | 17.18   | 17.25   |
| GAIF01014146.1 | 0       | 0       | 0       | 1.15    | 0       | 0.08    |
| GAIF01014147.1 | 0       | 0       | 0       | 0.65    | 0       | 0       |
| GAIF01014148.1 | 67.4    | 63.3    | 96.75   | 72.85   | 48.03   | 85.7    |
| GAIF01014150.1 | 6.73    | 6.83    | 6.77    | 1.72    | 1.51    | 2.26    |
| GAIF01014151.1 | 0.54    | 0.92    | 0.79    | 0.49    | 1.59    | 0.07    |
| GAIF01014152.1 | 0.1     | 0       | 0       | 1.05    | 3.34    | 0.3     |
| GAIF01014154.1 | 21.68   | 4.53    | 0       | 14.7    | 22.64   | 23.28   |
| GAIF01014157.1 | 0       | 0       | 0.12    | 0       | 0       | 0       |
| GAIF01014159.1 | 0       | 0       | 0       | 0       | 0       | 0.03    |
| GAIF01014161.1 | 15.99   | 18.93   | 13.78   | 8.01    | 6.21    | 1.45    |
| GAIF01014162.1 | 0.19    | 0.21    | 0       | 0.67    | 4.61    | 0       |
| GAIF01014163.1 | 5.71    | 4.89    | 5.41    | 0.44    | 0.49    | 0.53    |
| GAIF01014165.1 | 0       | 0       | 0       | 0.13    | 0.26    | 0       |
| GAIF01014167.1 | 0       | 0       | 0       | 0       | 0.07    | 0       |
| GAIF01014170.1 | 0       | 0       | 0       | 0.27    | 0       | 0       |
| GAIF01014171.1 | 0       | 0       | 0.03    | 0       | 0       | 0       |
| GAIF01014172.1 | 6.62    | 7.71    | 2.75    | 4       | 3.32    | 0.23    |
| GAIF01014173.1 | 7.01    | 10.43   | 9.11    | 56.8    | 56.96   | 4.73    |
| GAIF01014174.1 | 0.08    | 0       | 0       | 0.05    | 0.59    | 0.09    |
| GAIF01014175.1 | 1.48    | 1.29    | 1.01    | 1.56    | 4.19    | 0.68    |
| GAIF01014176.1 | 0.06    | 0       | 0       | 0       | 0       | 0       |
| GAIF01014178.1 | 6119.26 | 7330.94 | 7852.09 | 2264.08 | 1832.33 | 1929.72 |
| GAIF01014179.1 | 0       | 0       | 0       | 0.15    | 0       | 0       |
| GAIF01014180.1 | 0.15    | 0       | 0       | 0.42    | 2.28    | 0.08    |
| GAIF01014181.1 | 1.57    | 3.19    | 4.51    | 2.42    | 1.57    | 0.29    |
| GAIF01014183.1 | 0       | 0       | 0       | 0       | 0.09    | 0       |
| GAIF01014184.1 | 0.43    | 0.2     | 0.07    | 0.21    | 0.96    | 0       |

|                |         |        |        |        |       |        |
|----------------|---------|--------|--------|--------|-------|--------|
| GAIF01014185.1 | 1240.27 | 714.19 | 377.71 | 82     | 23.11 | 111.78 |
| GAIF01014186.1 | 0.22    | 0.72   | 0.17   | 0.33   | 0.2   | 0.16   |
| GAIF01014187.1 | 5.91    | 7.16   | 3.24   | 1.09   | 0.16  | 0      |
| GAIF01014189.1 | 0.42    | 0.37   | 0      | 2.01   | 6.47  | 0.07   |
| GAIF01014192.1 | 2.1     | 3.7    | 0.66   | 3.6    | 9.16  | 2.32   |
| GAIF01014193.1 | 0.06    | 0      | 0      | 0.14   | 0     | 0      |
| GAIF01014194.1 | 3.86    | 7.33   | 2.89   | 17.55  | 14.43 | 0.82   |
| GAIF01014195.1 | 0.52    | 0.13   | 0      | 0.51   | 0     | 0      |
| GAIF01014196.1 | 3.72    | 1.55   | 0.48   | 8.2    | 12    | 5.53   |
| GAIF01014197.1 | 0       | 0      | 0      | 0      | 0.04  | 0      |
| GAIF01014198.1 | 0.97    | 0.87   | 2.22   | 1.22   | 3.04  | 1.58   |
| GAIF01014199.1 | 0.72    | 0      | 0      | 0      | 3.1   | 0      |
| GAIF01014200.1 | 11.82   | 13.47  | 6.61   | 6.99   | 3.83  | 0.88   |
| GAIF01014201.1 | 71.32   | 58.47  | 37.34  | 34.32  | 49.76 | 8.42   |
| GAIF01014202.1 | 5.04    | 3.48   | 4.66   | 9.46   | 16    | 5.55   |
| GAIF01014204.1 | 0.16    | 0      | 0      | 0      | 0     | 0      |
| GAIF01014205.1 | 2.17    | 19.22  | 0      | 40.92  | 20.85 | 1.98   |
| GAIF01014207.1 | 0       | 0      | 0      | 0.23   | 0.1   | 0      |
| GAIF01014208.1 | 7.06    | 2.14   | 1.47   | 5.4    | 3.48  | 1.32   |
| GAIF01014209.1 | 9.29    | 7.44   | 2.55   | 40.13  | 36    | 0.85   |
| GAIF01014210.1 | 2.78    | 0      | 0.87   | 2.53   | 5.99  | 0      |
| GAIF01014212.1 | 7.64    | 4.42   | 7.74   | 15.6   | 4.97  | 8.72   |
| GAIF01014214.1 | 11.92   | 18.96  | 7.62   | 69.49  | 57.78 | 3.53   |
| GAIF01014215.1 | 0.28    | 0.08   | 0.23   | 0.16   | 0     | 0.08   |
| GAIF01014216.1 | 20.66   | 36.93  | 8.95   | 62.11  | 41.8  | 1.92   |
| GAIF01014217.1 | 33.67   | 26.78  | 26.76  | 21.86  | 12.53 | 18.95  |
| GAIF01014218.1 | 61.41   | 57.89  | 10.86  | 203.76 | 200   | 5.95   |
| GAIF01014219.1 | 0.06    | 0      | 0      | 0      | 0     | 0      |
| GAIF01014221.1 | 37.52   | 42.39  | 33.2   | 60.12  | 62.16 | 14.8   |
| GAIF01014223.1 | 0       | 0      | 0      | 0.04   | 0     | 0      |
| GAIF01014224.1 | 64.72   | 95.21  | 90.37  | 167.15 | 66.47 | 29.37  |
| GAIF01014226.1 | 16.78   | 5.88   | 9.32   | 25.21  | 40.04 | 28.4   |
| GAIF01014228.1 | 51.98   | 34.3   | 24.46  | 100.39 | 74.75 | 15.17  |
| GAIF01014230.1 | 0       | 0.07   | 0.13   | 0      | 0.74  | 0      |
| GAIF01014231.1 | 36.04   | 54.64  | 28.78  | 122.12 | 63.5  | 10.92  |
| GAIF01014232.1 | 0.09    | 0      | 0      | 0      | 0     | 0      |
| GAIF01014234.1 | 6.01    | 5.53   | 5.08   | 2.01   | 1.11  | 0.89   |
| GAIF01014236.1 | 2.15    | 2.34   | 2.36   | 8.03   | 9.42  | 0.8    |
| GAIF01014238.1 | 0       | 0.09   | 0.11   | 0.02   | 0.02  | 0      |
| GAIF01014240.1 | 0       | 0      | 0.12   | 0      | 0     | 0      |
| GAIF01014241.1 | 0.72    | 0      | 0.19   | 2.14   | 2.6   | 1.52   |
| GAIF01014242.1 | 0       | 0.13   | 0.2    | 0      | 0     | 0      |
| GAIF01014243.1 | 1.72    | 0.76   | 0.31   | 3.46   | 10.44 | 0.56   |
| GAIF01014244.1 | 96.95   | 21.76  | 51.86  | 23.96  | 0     | 13.58  |



|                |       |       |       |        |        |       |
|----------------|-------|-------|-------|--------|--------|-------|
| GAIF01014245.1 | 0.19  | 0     | 0     | 0.28   | 0      | 0     |
| GAIF01014246.1 | 0     | 0     | 0     | 0.15   | 0.15   | 0     |
| GAIF01014247.1 | 0     | 0.68  | 0     | 0      | 0      | 0     |
| GAIF01014248.1 | 0     | 0     | 0     | 0      | 0.26   | 0     |
| GAIF01014249.1 | 6.3   | 12.91 | 10.57 | 22.82  | 9.79   | 2.83  |
| GAIF01014250.1 | 0.1   | 0.21  | 0.07  | 0.04   | 0.78   | 0.07  |
| GAIF01014253.1 | 2.29  | 4.18  | 0.2   | 15.92  | 24.86  | 0     |
| GAIF01014255.1 | 4.94  | 2.38  | 3.36  | 10.89  | 12.63  | 9.25  |
| GAIF01014257.1 | 0.17  | 0.19  | 0     | 0.6    | 1.85   | 0.28  |
| GAIF01014258.1 | 0.67  | 0.12  | 0.25  | 0.91   | 0.13   | 0.25  |
| GAIF01014261.1 | 0     | 0     | 0     | 0.13   | 0.91   | 0.12  |
| GAIF01014262.1 | 0     | 0     | 0     | 0      | 0.48   | 0     |
| GAIF01014263.1 | 9.28  | 0     | 2.8   | 11.75  | 5.16   | 8.08  |
| GAIF01014264.1 | 1.13  | 1.06  | 1.22  | 1.23   | 1.49   | 0.21  |
| GAIF01014265.1 | 0.4   | 0     | 0     | 1.19   | 2.94   | 1.38  |
| GAIF01014266.1 | 0     | 0     | 0     | 0.38   | 0.4    | 0     |
| GAIF01014267.1 | 0     | 0     | 0     | 0.37   | 0.13   | 0     |
| GAIF01014270.1 | 0     | 0.13  | 0.06  | 0      | 0      | 0.07  |
| GAIF01014272.1 | 0     | 0     | 0     | 0      | 0.22   | 0     |
| GAIF01014274.1 | 0     | 0     | 0     | 1.18   | 5.43   | 0.1   |
| GAIF01014278.1 | 0     | 0     | 0     | 0.1    | 0.21   | 0     |
| GAIF01014280.1 | 0.24  | 0     | 0.05  | 0.61   | 4.89   | 0.78  |
| GAIF01014282.1 | 0     | 0     | 0     | 0      | 0.15   | 0     |
| GAIF01014283.1 | 0     | 0.76  | 0.57  | 0.2    | 0      | 0.19  |
| GAIF01014284.1 | 42.95 | 95.51 | 55.14 | 171.54 | 144.11 | 26.38 |
| GAIF01014285.1 | 24.62 | 13.79 | 4.64  | 32.69  | 37.73  | 11.88 |
| GAIF01014286.1 | 0.15  | 0     | 0.08  | 0.43   | 1.32   | 0.16  |
| GAIF01014288.1 | 2.75  | 2.31  | 1.24  | 3.34   | 2.71   | 1.52  |
| GAIF01014290.1 | 26.68 | 18.9  | 3.33  | 33.1   | 23.21  | 41.86 |
| GAIF01014291.1 | 0     | 0     | 0     | 0.19   | 0.38   | 0     |
| GAIF01014293.1 | 0     | 0.28  | 0     | 0.43   | 1.89   | 0     |
| GAIF01014294.1 | 0.74  | 0.72  | 0.27  | 0      | 0.3    | 0     |
| GAIF01014295.1 | 1     | 0.54  | 1.23  | 0.14   | 0.15   | 0     |
| GAIF01014297.1 | 8.25  | 6.69  | 4.43  | 34.08  | 28.61  | 5.06  |
| GAIF01014298.1 | 0.87  | 0.32  | 0.26  | 0.98   | 2.28   | 0.03  |
| GAIF01014299.1 | 0     | 0     | 0.24  | 0      | 0      | 0     |
| GAIF01014300.1 | 0     | 0     | 0     | 0.13   | 0.83   | 0     |
| GAIF01014301.1 | 0     | 0.78  | 0.14  | 0      | 0      | 0.09  |
| GAIF01014302.1 | 0.14  | 0     | 0     | 0      | 0.67   | 0     |
| GAIF01014303.1 | 0.3   | 0.17  | 0     | 0      | 0      | 0     |
| GAIF01014304.1 | 0     | 0     | 0     | 0      | 0.16   | 0     |
| GAIF01014306.1 | 9.64  | 0     | 3.67  | 3.73   | 5.71   | 12.43 |
| GAIF01014309.1 | 6.07  | 7.8   | 7.61  | 20.17  | 14.82  | 2.44  |
| GAIF01014313.1 | 9.2   | 9.87  | 5.79  | 8.26   | 1.18   | 0.27  |

|                |        |        |        |        |        |       |
|----------------|--------|--------|--------|--------|--------|-------|
| GAIF01014314.1 | 9.31   | 5.73   | 4.44   | 2.56   | 3.48   | 0     |
| GAIF01014315.1 | 1.46   | 3.82   | 4.45   | 2.62   | 2.21   | 0.32  |
| GAIF01014317.1 | 10.87  | 9.85   | 13.33  | 1.89   | 0.87   | 0.8   |
| GAIF01014318.1 | 1.89   | 2.39   | 0.54   | 0.35   | 0.73   | 0     |
| GAIF01014319.1 | 12.49  | 25.8   | 20.76  | 50.77  | 43.02  | 3.67  |
| GAIF01014320.1 | 0.4    | 7.19   | 0      | 2.06   | 5.11   | 5.8   |
| GAIF01014322.1 | 0.45   | 0.1    | 0      | 0.63   | 3.28   | 0.1   |
| GAIF01014323.1 | 0.94   | 0.33   | 0.18   | 6.99   | 23.44  | 1.33  |
| GAIF01014326.1 | 19.25  | 26.91  | 25.04  | 45.33  | 35.62  | 10.82 |
| GAIF01014327.1 | 0.33   | 0.09   | 0.82   | 0.48   | 0      | 0     |
| GAIF01014330.1 | 0      | 0      | 0      | 0      | 0      | 0.6   |
| GAIF01014332.1 | 3.22   | 5.76   | 5.19   | 7.06   | 6.03   | 1.26  |
| GAIF01014333.1 | 0.07   | 0      | 0      | 0      | 0      | 0     |
| GAIF01014334.1 | 0      | 0      | 0      | 0.19   | 0.86   | 0     |
| GAIF01014335.1 | 0.04   | 0.04   | 0      | 0.13   | 0      | 0     |
| GAIF01014336.1 | 14.78  | 11.41  | 9.72   | 43.07  | 34.42  | 19.13 |
| GAIF01014337.1 | 0      | 0      | 0      | 0      | 0.03   | 0     |
| GAIF01014338.1 | 0.1    | 0.33   | 0.22   | 0.12   | 0      | 0.11  |
| GAIF01014339.1 | 0.73   | 2.07   | 0.4    | 8.07   | 12.33  | 0.29  |
| GAIF01014340.1 | 9.52   | 4.89   | 0      | 19.9   | 0      | 0     |
| GAIF01014341.1 | 0      | 0      | 0      | 0      | 0.14   | 0     |
| GAIF01014342.1 | 0      | 0      | 0      | 0.56   | 2.41   | 0     |
| GAIF01014343.1 | 0      | 0.06   | 0      | 0      | 0      | 0     |
| GAIF01014344.1 | 0      | 0.04   | 0      | 0.08   | 0.24   | 0     |
| GAIF01014346.1 | 3.47   | 28.33  | 7.38   | 57.42  | 44.69  | 2.26  |
| GAIF01014347.1 | 0      | 3.26   | 7.13   | 0      | 5.13   | 1.22  |
| GAIF01014348.1 | 11.03  | 8.98   | 14.4   | 35.19  | 31.51  | 9.82  |
| GAIF01014349.1 | 1.46   | 1.32   | 1.25   | 1.78   | 0.93   | 1.12  |
| GAIF01014350.1 | 3.08   | 2.48   | 1.31   | 2.36   | 3.04   | 0.55  |
| GAIF01014353.1 | 0.33   | 0.12   | 0      | 2.25   | 12.88  | 0.9   |
| GAIF01014354.1 | 27.77  | 14.95  | 19.74  | 27.75  | 12.32  | 12.38 |
| GAIF01014356.1 | 10.3   | 9.68   | 11     | 17.34  | 19.74  | 5.42  |
| GAIF01014357.1 | 0      | 0      | 0      | 0.23   | 0.41   | 0     |
| GAIF01014358.1 | 10.53  | 7.35   | 3.86   | 20.61  | 18.81  | 2.12  |
| GAIF01014360.1 | 0.7    | 0.38   | 0.86   | 0.95   | 1.46   | 1.23  |
| GAIF01014362.1 | 12.35  | 3.9    | 1.92   | 9.43   | 35.06  | 48.72 |
| GAIF01014363.1 | 43.46  | 47.76  | 19.91  | 171.63 | 62.23  | 17.92 |
| GAIF01014364.1 | 723.66 | 467.32 | 273.19 | 428.4  | 253.58 | 85.17 |
| GAIF01014365.1 | 12.09  | 8.24   | 6.26   | 14.37  | 23.97  | 3.56  |
| GAIF01014369.1 | 0      | 0      | 0      | 0      | 0.72   | 0     |
| GAIF01014371.1 | 0      | 0      | 0      | 0.13   | 0.26   | 0     |
| GAIF01014372.1 | 38.6   | 12.49  | 7.71   | 32.98  | 57.7   | 36.19 |
| GAIF01014374.1 | 0      | 0      | 0      | 0.72   | 1.97   | 0.54  |
| GAIF01014375.1 | 0.38   | 0.33   | 0.41   | 0.26   | 0.27   | 0.17  |

|                |        |       |       |        |        |       |
|----------------|--------|-------|-------|--------|--------|-------|
| GAIF01014376.1 | 0      | 0     | 0.41  | 1.95   | 2.85   | 0     |
| GAIF01014377.1 | 0.22   | 0     | 0     | 1.65   | 3.02   | 0     |
| GAIF01014378.1 | 0      | 0     | 0     | 0.12   | 0.51   | 0     |
| GAIF01014379.1 | 0      | 0.14  | 0     | 0.15   | 0.08   | 0     |
| GAIF01014380.1 | 25.94  | 51.05 | 63.75 | 56.94  | 47.05  | 7.33  |
| GAIF01014381.1 | 0.51   | 0.77  | 0     | 0.79   | 0      | 0     |
| GAIF01014384.1 | 8.48   | 3.87  | 4.75  | 9.59   | 4.69   | 8.41  |
| GAIF01014385.1 | 0      | 0     | 0     | 0      | 0.17   | 0     |
| GAIF01014386.1 | 0.15   | 0.27  | 0     | 0.23   | 1.14   | 0     |
| GAIF01014388.1 | 37.71  | 45.62 | 32.61 | 15.57  | 9.75   | 5.24  |
| GAIF01014390.1 | 0      | 0     | 0     | 0      | 0.03   | 0     |
| GAIF01014391.1 | 0.05   | 0.05  | 0     | 0      | 0      | 0     |
| GAIF01014392.1 | 0      | 0     | 0     | 0      | 0      | 0.1   |
| GAIF01014393.1 | 1.77   | 12.51 | 3.06  | 4.7    | 14.83  | 0.62  |
| GAIF01014394.1 | 0      | 0     | 0     | 0.2    | 1.06   | 0     |
| GAIF01014395.1 | 62.26  | 60.38 | 34.84 | 124.03 | 53.43  | 19.51 |
| GAIF01014396.1 | 9.54   | 14.49 | 7.7   | 3.74   | 3.27   | 0.97  |
| GAIF01014397.1 | 0      | 0     | 0     | 0.08   | 0      | 0     |
| GAIF01014398.1 | 0      | 0.06  | 0     | 0.13   | 0.47   | 0     |
| GAIF01014399.1 | 0.34   | 0     | 0     | 0.15   | 0.32   | 0.05  |
| GAIF01014400.1 | 0.22   | 0.31  | 0     | 1.5    | 2.24   | 0.08  |
| GAIF01014401.1 | 0.42   | 0     | 0.08  | 0.16   | 0      | 0.08  |
| GAIF01014402.1 | 0      | 0.09  | 0     | 0      | 0.09   | 0     |
| GAIF01014403.1 | 0      | 0.16  | 0     | 0.17   | 1.45   | 0     |
| GAIF01014404.1 | 0      | 0     | 0.12  | 0      | 0      | 0     |
| GAIF01014406.1 | 28.22  | 41.93 | 8.09  | 137.13 | 154.99 | 6.57  |
| GAIF01014407.1 | 0.48   | 0.13  | 0.13  | 1.67   | 0.87   | 0.26  |
| GAIF01014408.1 | 0      | 0.13  | 0     | 0.14   | 0      | 0.13  |
| GAIF01014409.1 | 0      | 0     | 0     | 0      | 0.45   | 0     |
| GAIF01014410.1 | 1.05   | 0.59  | 0.15  | 1.99   | 8.36   | 0.49  |
| GAIF01014411.1 | 0      | 0.41  | 0.69  | 0.15   | 0      | 0.55  |
| GAIF01014412.1 | 1.69   | 1.61  | 0.52  | 0.94   | 2.26   | 0.62  |
| GAIF01014413.1 | 31.52  | 29.56 | 50.54 | 51.46  | 23.04  | 32.01 |
| GAIF01014415.1 | 27.33  | 33.78 | 37.1  | 121.26 | 90.46  | 24.31 |
| GAIF01014416.1 | 0      | 0     | 0     | 0      | 0.16   | 0     |
| GAIF01014418.1 | 0.09   | 0     | 0     | 0.05   | 0.16   | 0     |
| GAIF01014420.1 | 0      | 0     | 0     | 0.26   | 0.41   | 0     |
| GAIF01014421.1 | 76.36  | 75.86 | 68.68 | 70.61  | 37.52  | 12.44 |
| GAIF01014422.1 | 0.04   | 0.19  | 0     | 2.51   | 6.6    | 0.06  |
| GAIF01014423.1 | 2.95   | 2.27  | 0.48  | 7.36   | 23.2   | 1.25  |
| GAIF01014424.1 | 4.65   | 1.22  | 0.93  | 5.88   | 7.62   | 22.81 |
| GAIF01014425.1 | 372.52 | 258.9 | 220.6 | 4.26   | 4.89   | 5.36  |
| GAIF01014426.1 | 0.14   | 0     | 0     | 0      | 0.53   | 0     |
| GAIF01014428.1 | 0      | 0     | 0     | 0.02   | 0.02   | 0     |

|                |         |         |         |         |         |         |
|----------------|---------|---------|---------|---------|---------|---------|
| GAIF01014430.1 | 4.94    | 3.66    | 7.17    | 5.6     | 5.76    | 5.43    |
| GAIF01014432.1 | 27.19   | 14.96   | 14.98   | 61.96   | 59.57   | 65.87   |
| GAIF01014434.1 | 34.37   | 55.29   | 30.14   | 36.18   | 13.4    | 33.71   |
| GAIF01014435.1 | 4.32    | 1.68    | 2.76    | 5.17    | 4.74    | 1.49    |
| GAIF01014436.1 | 2290.2  | 1769.25 | 3496.18 | 911.74  | 502.95  | 1710.11 |
| GAIF01014437.1 | 0       | 0       | 0.12    | 0       | 0       | 0       |
| GAIF01014438.1 | 0.06    | 0       | 0       | 0       | 0       | 0       |
| GAIF01014439.1 | 3.69    | 2.5     | 2.78    | 6.3     | 18.04   | 21.89   |
| GAIF01014440.1 | 10.5    | 12.63   | 19.67   | 27.29   | 18.47   | 9.71    |
| GAIF01014441.1 | 1.62    | 0.2     | 0.4     | 4.61    | 12.38   | 1.19    |
| GAIF01014442.1 | 3.19    | 1.67    | 1.56    | 9.87    | 27.88   | 2.56    |
| GAIF01014444.1 | 1962.47 | 498.89  | 221.54  | 1882.52 | 2784.81 | 3166.53 |
| GAIF01014447.1 | 5.28    | 7.66    | 4.3     | 6.22    | 5.87    | 2.03    |
| GAIF01014448.1 | 0.05    | 0.1     | 0.05    | 0       | 0.17    | 0.05    |
| GAIF01014449.1 | 10.3    | 15.19   | 3.04    | 4.48    | 16.56   | 1.75    |
| GAIF01014450.1 | 0.1     | 0       | 0       | 0       | 0.04    | 0       |
| GAIF01014451.1 | 0.17    | 0.12    | 0       | 0       | 0.48    | 0       |
| GAIF01014453.1 | 0.86    | 0.93    | 1.15    | 0.76    | 1.1     | 0.58    |
| GAIF01014455.1 | 0       | 0       | 14.4    | 0       | 15.77   | 0       |
| GAIF01014457.1 | 0       | 0       | 0       | 0.75    | 0       | 0       |
| GAIF01014458.1 | 0       | 0       | 0       | 0.26    | 3.69    | 0.25    |
| GAIF01014459.1 | 0.21    | 0       | 0.23    | 2.4     | 6.22    | 0       |
| GAIF01014460.1 | 0       | 0.23    | 0.06    | 0.04    | 1.5     | 0       |
| GAIF01014461.1 | 5.28    | 8.84    | 0.16    | 16.4    | 56.64   | 1.26    |
| GAIF01014462.1 | 0.11    | 0.08    | 0.12    | 0       | 0.09    | 0.04    |
| GAIF01014463.1 | 3.31    | 2.15    | 5.06    | 0.67    | 0.09    | 1.86    |
| GAIF01014464.1 | 4.39    | 2.24    | 4.49    | 12.36   | 8.15    | 19.4    |
| GAIF01014465.1 | 0.07    | 0       | 0       | 0.25    | 0.7     | 0       |
| GAIF01014467.1 | 4.1     | 2.3     | 0.17    | 2.08    | 2.59    | 0.09    |
| GAIF01014470.1 | 1.96    | 1.03    | 0.37    | 2.91    | 11.32   | 0.3     |
| GAIF01014473.1 | 15.98   | 12.65   | 13.29   | 27.76   | 33.36   | 3.43    |
| GAIF01014475.1 | 0       | 0.4     | 0.34    | 0       | 0       | 0.07    |
| GAIF01014476.1 | 14.1    | 6.82    | 11.77   | 21.39   | 27.78   | 12.53   |
| GAIF01014478.1 | 0.08    | 0       | 0       | 3.38    | 10.92   | 0       |
| GAIF01014479.1 | 0.31    | 0.61    | 0       | 0.52    | 0.53    | 0.43    |
| GAIF01014480.1 | 0.19    | 0       | 0       | 0.66    | 3.21    | 0       |
| GAIF01014481.1 | 3.69    | 2.87    | 1.74    | 5.2     | 0.95    | 2.32    |
| GAIF01014482.1 | 0       | 0       | 0       | 0       | 0.36    | 0       |
| GAIF01014485.1 | 1.73    | 0.21    | 0.11    | 0.22    | 4.63    | 0.74    |
| GAIF01014486.1 | 0.52    | 0.57    | 0.19    | 0.3     | 0.11    | 0       |
| GAIF01014488.1 | 0       | 0       | 0.84    | 0.73    | 6.72    | 16.55   |
| GAIF01014491.1 | 17.73   | 12.72   | 10.98   | 3       | 2.65    | 1.76    |
| GAIF01014492.1 | 0       | 0       | 0       | 0       | 0.18    | 0       |
| GAIF01014496.1 | 0       | 0       | 0.04    | 0       | 0       | 0       |

|                |        |        |        |        |        |        |
|----------------|--------|--------|--------|--------|--------|--------|
| GAIF01014497.1 | 0.9    | 0      | 0.25   | 1.02   | 1.39   | 0.15   |
| GAIF01014501.1 | 0.12   | 0      | 0.2    | 0      | 1.11   | 0      |
| GAIF01014502.1 | 0      | 0      | 0.01   | 26.33  | 0      | 6.67   |
| GAIF01014503.1 | 0.14   | 0.15   | 0      | 1.94   | 8.71   | 0.61   |
| GAIF01014504.1 | 10.36  | 5.96   | 0.51   | 20.69  | 30.09  | 5.38   |
| GAIF01014505.1 | 2.25   | 0.89   | 0.06   | 0.39   | 0      | 0.11   |
| GAIF01014506.1 | 1.59   | 1.09   | 2.3    | 7.25   | 4.66   | 6.77   |
| GAIF01014507.1 | 0.54   | 0.21   | 0.26   | 0.09   | 0.93   | 0.09   |
| GAIF01014508.1 | 5.34   | 10.78  | 5.44   | 21.54  | 9.17   | 1.96   |
| GAIF01014509.1 | 0      | 0      | 0      | 0.11   | 0      | 0      |
| GAIF01014510.1 | 0.66   | 0.3    | 0      | 0.41   | 1.8    | 2.7    |
| GAIF01014511.1 | 0.61   | 0      | 0      | 4.22   | 21.23  | 0      |
| GAIF01014513.1 | 1.37   | 0.82   | 1.02   | 1.54   | 1.01   | 0.19   |
| GAIF01014514.1 | 0      | 0      | 0      | 0      | 0.1    | 0      |
| GAIF01014515.1 | 3.55   | 3.99   | 1.54   | 22.09  | 0      | 1.06   |
| GAIF01014516.1 | 0.16   | 0.09   | 0      | 0.28   | 0.97   | 0.18   |
| GAIF01014518.1 | 0.1    | 0      | 0.22   | 0.12   | 0      | 0      |
| GAIF01014519.1 | 0      | 0.46   | 0.1    | 0.91   | 0.18   | 0.11   |
| GAIF01014520.1 | 11.23  | 7.24   | 5.35   | 14.11  | 8.56   | 1.37   |
| GAIF01014521.1 | 8.77   | 14.56  | 10.15  | 25.72  | 13.97  | 4.96   |
| GAIF01014522.1 | 4.57   | 5.56   | 3.81   | 12.44  | 12.8   | 0.35   |
| GAIF01014523.1 | 0.11   | 0.06   | 0.06   | 0      | 0.2    | 0      |
| GAIF01014526.1 | 10.49  | 7.64   | 9.15   | 40.28  | 35.91  | 10     |
| GAIF01014527.1 | 0      | 0.15   | 0      | 0.16   | 0.97   | 0.15   |
| GAIF01014528.1 | 6      | 1.38   | 0.4    | 5.49   | 11.37  | 18.03  |
| GAIF01014529.1 | 19.07  | 19.54  | 15.32  | 40.42  | 32.35  | 114.05 |
| GAIF01014530.1 | 2.51   | 2.81   | 0.8    | 7.07   | 8.12   | 1.39   |
| GAIF01014531.1 | 0.12   | 0      | 0      | 0.48   | 2.02   | 0      |
| GAIF01014532.1 | 5.32   | 13.37  | 7.55   | 25.18  | 18.86  | 1.83   |
| GAIF01014533.1 | 417.89 | 462.74 | 400.78 | 878.02 | 803.7  | 595.08 |
| GAIF01014535.1 | 0      | 0      | 0      | 0      | 0.17   | 0      |
| GAIF01014536.1 | 4.46   | 14.31  | 8.54   | 6.3    | 8.16   | 1.7    |
| GAIF01014537.1 | 0.51   | 0.66   | 0.39   | 2.59   | 13.41  | 0.11   |
| GAIF01014538.1 | 84.85  | 97.05  | 75.91  | 245.85 | 125.99 | 38.49  |
| GAIF01014539.1 | 1.92   | 1.37   | 1.21   | 9.29   | 19     | 2.17   |
| GAIF01014540.1 | 0      | 0      | 0      | 0      | 0.12   | 0      |
| GAIF01014541.1 | 29.79  | 36.9   | 43.71  | 38.33  | 23.4   | 9.31   |
| GAIF01014542.1 | 0      | 0      | 0      | 0.06   | 0      | 0      |
| GAIF01014543.1 | 4.46   | 5.54   | 2.38   | 0.59   | 0.46   | 0.14   |
| GAIF01014544.1 | 0.06   | 0      | 0.06   | 0      | 0.1    | 0      |
| GAIF01014545.1 | 0      | 0.46   | 0.53   | 0      | 0      | 0      |
| GAIF01014547.1 | 18.04  | 18.15  | 29.27  | 27.5   | 13.76  | 19.44  |
| GAIF01014551.1 | 62.68  | 193.3  | 84.68  | 35.59  | 59.95  | 13.99  |
| GAIF01014552.1 | 0.38   | 0.57   | 0.35   | 1.45   | 5.18   | 0.48   |

|                |         |         |         |         |        |        |
|----------------|---------|---------|---------|---------|--------|--------|
| GAIF01014553.1 | 6.33    | 3.06    | 6.75    | 2.04    | 1.48   | 6.2    |
| GAIF01014554.1 | 0       | 0.05    | 0       | 0       | 0      | 0      |
| GAIF01014556.1 | 0       | 0.01    | 0.09    | 0.2     | 0.58   | 0      |
| GAIF01014557.1 | 0.37    | 0.89    | 0.2     | 0.42    | 0.55   | 0      |
| GAIF01014558.1 | 49.77   | 81.03   | 151.88  | 60.9    | 54.5   | 52.11  |
| GAIF01014559.1 | 47.95   | 20.4    | 13.81   | 93.31   | 64.96  | 31.61  |
| GAIF01014560.1 | 0.29    | 0       | 0       | 0.72    | 3.05   | 0.43   |
| GAIF01014561.1 | 0.17    | 0       | 0       | 0       | 0      | 0      |
| GAIF01014563.1 | 1.58    | 0.22    | 0.64    | 3.81    | 25.13  | 3.52   |
| GAIF01014564.1 | 0       | 0.06    | 0       | 0       | 0.07   | 0      |
| GAIF01014566.1 | 1591.22 | 2010.59 | 2007.56 | 1029.82 | 802.95 | 654.98 |
| GAIF01014567.1 | 7.48    | 10.59   | 4.97    | 35.54   | 34.76  | 1.92   |
| GAIF01014568.1 | 0       | 0.83    | 0.18    | 0       | 0      | 0      |
| GAIF01014570.1 | 0       | 0       | 0.28    | 0       | 0.27   | 0      |
| GAIF01014573.1 | 10.23   | 13.24   | 20.81   | 13.33   | 12.3   | 5.82   |
| GAIF01014574.1 | 0.03    | 0.04    | 0.07    | 0.15    | 0.12   | 0      |
| GAIF01014576.1 | 0.44    | 0.14    | 0.07    | 3.53    | 13.57  | 0.84   |
| GAIF01014579.1 | 9.58    | 2.38    | 0.25    | 21.17   | 65.68  | 15.04  |
| GAIF01014580.1 | 151.56  | 81.25   | 50.52   | 125.94  | 138.24 | 40.36  |
| GAIF01014581.1 | 19.58   | 21.69   | 14.23   | 59.22   | 36.07  | 14.71  |
| GAIF01014583.1 | 2.21    | 2.04    | 1.74    | 8.99    | 22.99  | 2.34   |
| GAIF01014584.1 | 0       | 0       | 0       | 0       | 0.32   | 0      |
| GAIF01014585.1 | 0.27    | 0.15    | 0.1     | 1.7     | 6.54   | 0      |
| GAIF01014586.1 | 0.83    | 0.23    | 0       | 2.89    | 16.34  | 0.08   |
| GAIF01014587.1 | 10.4    | 10.19   | 28.12   | 9.38    | 4.86   | 10.66  |
| GAIF01014591.1 | 3.61    | 2.47    | 4.79    | 0.49    | 0.61   | 0.93   |
| GAIF01014593.1 | 3.94    | 9.19    | 0.62    | 28.01   | 50.37  | 1.55   |
| GAIF01014594.1 | 0       | 0.41    | 0       | 0.86    | 0      | 0.25   |
| GAIF01014596.1 | 0.49    | 0.86    | 0.54    | 3.09    | 4.15   | 1.2    |
| GAIF01014597.1 | 0       | 0       | 0       | 0.69    | 0.7    | 0      |
| GAIF01014599.1 | 0       | 0       | 0.05    | 0       | 0      | 0      |
| GAIF01014600.1 | 0.61    | 0.38    | 0       | 0.27    | 0      | 0.06   |
| GAIF01014602.1 | 0.12    | 0.38    | 0       | 0.14    | 0.42   | 0      |
| GAIF01014605.1 | 3.2     | 2.65    | 0.23    | 19.91   | 45.4   | 0.07   |
| GAIF01014606.1 | 11.31   | 8.9     | 1.5     | 24.79   | 39.18  | 2.19   |
| GAIF01014608.1 | 0       | 0       | 0       | 0.11    | 0      | 0      |
| GAIF01014609.1 | 0.16    | 0       | 1.05    | 0       | 0      | 0.01   |
| GAIF01014611.1 | 20.76   | 13.57   | 7.03    | 0.39    | 0.44   | 1.02   |
| GAIF01014613.1 | 0.3     | 0.25    | 0.23    | 0.04    | 0      | 0      |
| GAIF01014614.1 | 0       | 0       | 0       | 0       | 0.29   | 0      |
| GAIF01014616.1 | 4.34    | 0.38    | 0.61    | 1.38    | 2.69   | 1.39   |
| GAIF01014617.1 | 56.87   | 41.26   | 22.46   | 2.81    | 2.31   | 9.82   |
| GAIF01014619.1 | 70.82   | 42.58   | 34.4    | 100.66  | 132.53 | 155.48 |
| GAIF01014620.1 | 0.33    | 0.15    | 0       | 0.99    | 8.55   | 0.52   |

|                |        |        |        |        |        |        |
|----------------|--------|--------|--------|--------|--------|--------|
| GAIF01014622.1 | 0      | 0      | 0.06   | 0      | 0.07   | 0      |
| GAIF01014623.1 | 0      | 0      | 0      | 0      | 0      | 0.11   |
| GAIF01014624.1 | 0      | 0      | 0      | 0.11   | 0      | 0      |
| GAIF01014625.1 | 0      | 0.24   | 0.72   | 0      | 0      | 0.16   |
| GAIF01014626.1 | 0.34   | 0.51   | 0.44   | 2.55   | 5.75   | 0.46   |
| GAIF01014628.1 | 0      | 0.05   | 0.05   | 0.35   | 1.25   | 0.38   |
| GAIF01014630.1 | 0.62   | 0      | 0      | 0.22   | 4.02   | 2.66   |
| GAIF01014631.1 | 0      | 0      | 0      | 0      | 0.07   | 0      |
| GAIF01014633.1 | 0      | 0.16   | 0      | 3.59   | 6.9    | 0.16   |
| GAIF01014634.1 | 1.59   | 1.05   | 0.12   | 15.45  | 37.8   | 0.44   |
| GAIF01014635.1 | 0.44   | 0      | 0.16   | 0.17   | 0      | 0      |
| GAIF01014636.1 | 1.37   | 1.89   | 0.53   | 0.06   | 0.74   | 0.04   |
| GAIF01014637.1 | 6.98   | 4.03   | 4.28   | 19.35  | 50.08  | 44.8   |
| GAIF01014638.1 | 0      | 0      | 0.16   | 0      | 0      | 0      |
| GAIF01014639.1 | 0.14   | 0.25   | 0.47   | 0.18   | 0.92   | 0      |
| GAIF01014640.1 | 1.21   | 0.44   | 0      | 0.19   | 0.1    | 0      |
| GAIF01014641.1 | 1.9    | 0.56   | 0.7    | 6.88   | 19.49  | 3.12   |
| GAIF01014643.1 | 0      | 0      | 0.3    | 0.11   | 0.07   | 0.1    |
| GAIF01014644.1 | 209.05 | 366.9  | 230.07 | 283.56 | 360.62 | 48.02  |
| GAIF01014646.1 | 1.81   | 1.5    | 0.09   | 18.07  | 72.79  | 0.28   |
| GAIF01014647.1 | 7.2    | 2.24   | 3.39   | 5.97   | 2.47   | 3.4    |
| GAIF01014648.1 | 9.8    | 11.2   | 10.48  | 0.58   | 0.6    | 1.38   |
| GAIF01014649.1 | 29.47  | 21.26  | 20.99  | 14.91  | 22.56  | 5.9    |
| GAIF01014651.1 | 0      | 0      | 0      | 0.23   | 1.09   | 0      |
| GAIF01014652.1 | 0.1    | 0.05   | 0      | 0.31   | 0.43   | 0.07   |
| GAIF01014653.1 | 8.6    | 9.11   | 9.26   | 28.8   | 18.77  | 6.42   |
| GAIF01014654.1 | 0      | 0.81   | 0      | 8.77   | 1.75   | 0.86   |
| GAIF01014656.1 | 2.42   | 3.98   | 4.08   | 5.09   | 5.72   | 2.98   |
| GAIF01014658.1 | 2.07   | 1.12   | 5.48   | 0.66   | 0.24   | 3.74   |
| GAIF01014660.1 | 0      | 0      | 0      | 1.15   | 0      | 0      |
| GAIF01014662.1 | 0      | 0      | 0      | 0      | 0.19   | 0      |
| GAIF01014663.1 | 0      | 0      | 0      | 0      | 0.14   | 0      |
| GAIF01014665.1 | 16.9   | 20.29  | 37.49  | 21.21  | 16.3   | 33.04  |
| GAIF01014667.1 | 0.19   | 0.21   | 0.16   | 0.2    | 2.47   | 0.08   |
| GAIF01014669.1 | 19.84  | 15.82  | 28.58  | 18.09  | 12.52  | 20.65  |
| GAIF01014670.1 | 0      | 0      | 0      | 0      | 0.31   | 0      |
| GAIF01014671.1 | 27.07  | 34.09  | 30.69  | 44.14  | 21.5   | 8.47   |
| GAIF01014674.1 | 0.91   | 0      | 0      | 5.8    | 16.54  | 0.75   |
| GAIF01014675.1 | 65.4   | 74.23  | 99.04  | 187.65 | 73.37  | 32.74  |
| GAIF01014676.1 | 0      | 0      | 0.05   | 0.06   | 0.18   | 0.55   |
| GAIF01014678.1 | 75.13  | 65.73  | 63.79  | 99.15  | 79.68  | 30.9   |
| GAIF01014679.1 | 137    | 174.97 | 422.28 | 66.44  | 67.45  | 247.26 |
| GAIF01014681.1 | 1.05   | 2.44   | 0      | 4.89   | 11.89  | 0      |
| GAIF01014682.1 | 12     | 9.47   | 5.69   | 23.63  | 11.62  | 5.61   |

|                |         |         |         |         |        |         |
|----------------|---------|---------|---------|---------|--------|---------|
| GAIF01014683.1 | 0.23    | 0.1     | 0       | 0.31    | 1.02   | 0.14    |
| GAIF01014684.1 | 2.8     | 0.28    | 0.28    | 16.38   | 35.32  | 2.38    |
| GAIF01014685.1 | 0       | 0       | 0       | 0.88    | 3.47   | 0.3     |
| GAIF01014687.1 | 0       | 0       | 0       | 0.01    | 0.01   | 0.02    |
| GAIF01014688.1 | 0.19    | 0.47    | 0.18    | 0.09    | 0.1    | 0       |
| GAIF01014689.1 | 14.9    | 11.34   | 9.46    | 34.35   | 15.68  | 7.06    |
| GAIF01014690.1 | 0.8     | 0.19    | 0       | 0.47    | 1.41   | 0.27    |
| GAIF01014692.1 | 15.24   | 0.35    | 1.42    | 8.17    | 5.26   | 14.74   |
| GAIF01014693.1 | 23.83   | 33.35   | 25.17   | 80.89   | 75.77  | 12.16   |
| GAIF01014694.1 | 29.06   | 18.07   | 13.33   | 34.12   | 15.13  | 2.26    |
| GAIF01014696.1 | 7.3     | 0.81    | 0.63    | 9.23    | 23.81  | 13.75   |
| GAIF01014698.1 | 0.04    | 0       | 0       | 0       | 0      | 0       |
| GAIF01014699.1 | 0       | 0       | 0       | 0.18    | 0.36   | 0       |
| GAIF01014700.1 | 0.74    | 0.66    | 0.36    | 1.56    | 2.18   | 0.51    |
| GAIF01014701.1 | 0       | 0       | 0       | 0       | 0.53   | 0.16    |
| GAIF01014702.1 | 0.22    | 0.19    | 0.18    | 0.06    | 0.04   | 0       |
| GAIF01014703.1 | 0       | 0       | 0       | 0.05    | 0.34   | 0       |
| GAIF01014704.1 | 3.73    | 1.52    | 7.05    | 0       | 0.39   | 0.48    |
| GAIF01014705.1 | 0       | 0       | 0       | 0       | 1.19   | 0       |
| GAIF01014706.1 | 0.84    | 0.33    | 0       | 10.76   | 26.54  | 0.16    |
| GAIF01014707.1 | 20.11   | 12.83   | 8.35    | 29.81   | 23.99  | 6.94    |
| GAIF01014708.1 | 0       | 0       | 0       | 0.19    | 0.39   | 0       |
| GAIF01014709.1 | 1.05    | 0.14    | 0.49    | 1.09    | 0      | 0       |
| GAIF01014711.1 | 1.34    | 0       | 0       | 0.84    | 13.73  | 2.52    |
| GAIF01014712.1 | 2.58    | 1.93    | 0.27    | 0.27    | 0.07   | 0.08    |
| GAIF01014714.1 | 2.08    | 1.77    | 0       | 17.22   | 46.01  | 0       |
| GAIF01014715.1 | 0       | 0       | 0       | 0.2     | 1.27   | 0.1     |
| GAIF01014716.1 | 1.25    | 1.22    | 0.36    | 6.03    | 13.37  | 0.29    |
| GAIF01014717.1 | 0       | 0       | 0       | 0       | 2.32   | 0       |
| GAIF01014718.1 | 0.16    | 0       | 0.54    | 0       | 1.64   | 0.22    |
| GAIF01014719.1 | 0.62    | 0       | 0       | 0       | 0      | 0       |
| GAIF01014720.1 | 3.29    | 5.8     | 1.83    | 7.91    | 7.53   | 0.51    |
| GAIF01014721.1 | 2812.35 | 2865.07 | 5744.62 | 1525.34 | 976.42 | 3701.76 |
| GAIF01014722.1 | 6.8     | 2.58    | 1.3     | 12.11   | 19.85  | 2.4     |
| GAIF01014723.1 | 0.11    | 0       | 0       | 0.22    | 1.6    | 0       |
| GAIF01014726.1 | 14.18   | 8.35    | 0.64    | 5.62    | 14.17  | 0.09    |
| GAIF01014727.1 | 24.57   | 2.26    | 4.14    | 19.61   | 12.04  | 6.16    |
| GAIF01014728.1 | 68.85   | 57.07   | 4.89    | 65.16   | 110.58 | 25.22   |
| GAIF01014729.1 | 0       | 0.18    | 0       | 0.29    | 2.27   | 0       |
| GAIF01014732.1 | 6.53    | 3.57    | 2.79    | 24.07   | 42.88  | 2.8     |
| GAIF01014733.1 | 0.17    | 0       | 0       | 4.51    | 15.33  | 0.94    |
| GAIF01014734.1 | 10.92   | 8.95    | 4.44    | 6.08    | 1.8    | 0.33    |
| GAIF01014735.1 | 0       | 0       | 0       | 0.2     | 0.42   | 0       |
| GAIF01014736.1 | 0.04    | 0.02    | 0.05    | 0.02    | 0.1    | 0.05    |



|                |         |        |          |         |         |         |
|----------------|---------|--------|----------|---------|---------|---------|
| GAIF01014740.1 | 19.39   | 10.64  | 9.13     | 39.84   | 61.07   | 12.49   |
| GAIF01014741.1 | 0.53    | 0.19   | 0.2      | 1.03    | 5.57    | 0.2     |
| GAIF01014742.1 | 2470.16 | 898.89 | 558.9    | 1420.82 | 1428.97 | 2421.6  |
| GAIF01014745.1 | 6.78    | 4.58   | 1.07     | 19.13   | 33.36   | 1.03    |
| GAIF01014747.1 | 6.32    | 11.47  | 8.2      | 26.93   | 19.19   | 2.75    |
| GAIF01014748.1 | 2.1     | 0.83   | 1.05     | 3.65    | 1.83    | 0.21    |
| GAIF01014749.1 | 1.84    | 1.92   | 0.28     | 1.05    | 0.41    | 0.22    |
| GAIF01014750.1 | 6.34    | 1.76   | 5.67     | 12.67   | 1.42    | 5.04    |
| GAIF01014751.1 | 0.03    | 0      | 0.03     | 0.4     | 0.55    | 0       |
| GAIF01014752.1 | 0.24    | 0      | 0        | 0       | 0.18    | 0.11    |
| GAIF01014754.1 | 126.71  | 160.99 | 451.01   | 156.97  | 130.88  | 351.64  |
| GAIF01014755.1 | 24.26   | 14.62  | 7.23     | 2.17    | 0.86    | 2.06    |
| GAIF01014756.1 | 0.09    | 0.1    | 0.1      | 0.48    | 3.95    | 0.05    |
| GAIF01014757.1 | 19.72   | 18.94  | 17.35    | 35.32   | 23.92   | 10.77   |
| GAIF01014758.1 | 35.74   | 33.8   | 25.19    | 69.46   | 42.38   | 17.22   |
| GAIF01014759.1 | 0.1     | 0.17   | 0.08     | 1.55    | 9       | 0.05    |
| GAIF01014760.1 | 78      | 101.04 | 56.29    | 132.49  | 264.06  | 452.78  |
| GAIF01014762.1 | 5866.49 | 5231.2 | 10663.74 | 3221.97 | 1621.06 | 4673.02 |
| GAIF01014763.1 | 0       | 0      | 0        | 0.09    | 2.42    | 0.17    |
| GAIF01014765.1 | 98.17   | 69.88  | 98.18    | 109.46  | 48.57   | 56.7    |
| GAIF01014766.1 | 0.09    | 0.1    | 0        | 0       | 0       | 0       |
| GAIF01014767.1 | 40.27   | 45.49  | 35.43    | 54.97   | 30.99   | 4.97    |
| GAIF01014768.1 | 13.64   | 27.95  | 21.39    | 60.56   | 38.85   | 8.09    |
| GAIF01014769.1 | 0       | 0      | 0        | 0       | 0.88    | 0.22    |
| GAIF01014771.1 | 1.2     | 1.31   | 0.94     | 2.46    | 0.55    | 0       |
| GAIF01014772.1 | 0       | 0      | 0        | 0.09    | 0.49    | 0.08    |
| GAIF01014773.1 | 9.31    | 8.47   | 4.75     | 0       | 0       | 0       |
| GAIF01014774.1 | 0       | 0.14   | 0        | 0       | 0       | 0       |
| GAIF01014777.1 | 1.24    | 0.23   | 0.12     | 3.21    | 9.85    | 6.41    |
| GAIF01014778.1 | 0       | 0.23   | 0        | 0.73    | 2.01    | 0.23    |
| GAIF01014779.1 | 14.88   | 13.12  | 12.56    | 12.54   | 7.68    | 2.78    |
| GAIF01014780.1 | 0.16    | 0.06   | 0        | 0       | 0       | 0.06    |
| GAIF01014781.1 | 0       | 18.74  | 0        | 0       | 3.57    | 0       |
| GAIF01014782.1 | 209.14  | 38.85  | 42.35    | 152.07  | 140.27  | 138.54  |
| GAIF01014783.1 | 0.08    | 0.17   | 0.35     | 0.09    | 0       | 0.09    |
| GAIF01014785.1 | 0       | 0      | 0        | 0       | 0.28    | 0       |
| GAIF01014786.1 | 33.95   | 27.45  | 50.18    | 18.43   | 11.18   | 24.31   |
| GAIF01014787.1 | 3.51    | 5.77   | 6.48     | 24.72   | 39.28   | 3.46    |
| GAIF01014788.1 | 0.04    | 0      | 0.02     | 0.66    | 1.11    | 0.06    |
| GAIF01014789.1 | 0       | 0      | 0        | 0       | 0.08    | 0       |
| GAIF01014790.1 | 0.07    | 0      | 0        | 0.82    | 5.94    | 0.31    |
| GAIF01014793.1 | 0       | 0      | 0        | 0.07    | 0.46    | 0       |
| GAIF01014794.1 | 0.06    | 0      | 0        | 0.53    | 3.15    | 0.06    |
| GAIF01014796.1 | 8.73    | 14.48  | 4.55     | 13.02   | 21.78   | 2.77    |

|                |        |         |        |        |        |        |
|----------------|--------|---------|--------|--------|--------|--------|
| GAIF01014798.1 | 22.26  | 11.72   | 12.49  | 63.63  | 93.39  | 69.72  |
| GAIF01014799.1 | 0      | 0       | 0      | 0.24   | 1.35   | 0      |
| GAIF01014800.1 | 1.41   | 0.28    | 0.43   | 2.94   | 0.81   | 0.73   |
| GAIF01014801.1 | 2.77   | 1.24    | 0.09   | 8.69   | 20.06  | 2.96   |
| GAIF01014802.1 | 0      | 0       | 0      | 0.13   | 0      | 0      |
| GAIF01014803.1 | 0.66   | 0.7     | 0      | 0.93   | 0.97   | 0      |
| GAIF01014804.1 | 9.37   | 5.23    | 3.79   | 16.99  | 11.29  | 3.37   |
| GAIF01014805.1 | 0      | 0       | 0      | 0      | 0      | 0.11   |
| GAIF01014807.1 | 0      | 0.1     | 0      | 0.05   | 1.28   | 0      |
| GAIF01014808.1 | 0.14   | 0       | 0      | 0      | 0.39   | 0.18   |
| GAIF01014810.1 | 1.82   | 0.63    | 0.18   | 11     | 31.54  | 2.16   |
| GAIF01014811.1 | 3.9    | 2.45    | 8.57   | 5.49   | 5.03   | 8.16   |
| GAIF01014813.1 | 905.72 | 1066.83 | 759.46 | 578.36 | 782.74 | 346.74 |
| GAIF01014814.1 | 0      | 0       | 0      | 0      | 0.08   | 0      |
| GAIF01014815.1 | 1.74   | 0.47    | 0.85   | 4.92   | 8.02   | 0.5    |
| GAIF01014816.1 | 0.06   | 0.33    | 0.07   | 0.21   | 0.14   | 0.13   |
| GAIF01014817.1 | 0      | 0.21    | 0      | 0      | 0      | 0      |
| GAIF01014818.1 | 0      | 0       | 0      | 0      | 0.23   | 0      |
| GAIF01014819.1 | 52.45  | 63.36   | 23.03  | 28.41  | 51.86  | 8.99   |
| GAIF01014820.1 | 0      | 0       | 0      | 0.14   | 0.76   | 0      |
| GAIF01014821.1 | 0      | 0       | 0      | 0.1    | 0      | 0      |
| GAIF01014823.1 | 0      | 0       | 0.61   | 0      | 0      | 0.37   |
| GAIF01014824.1 | 0      | 0       | 0      | 0      | 0.07   | 0      |
| GAIF01014825.1 | 0      | 0.87    | 1.02   | 0      | 0      | 0.44   |
| GAIF01014826.1 | 0      | 0       | 0      | 0      | 0.42   | 0      |
| GAIF01014827.1 | 0.14   | 0.08    | 0      | 1.11   | 3.2    | 0.15   |
| GAIF01014828.1 | 33.21  | 18.47   | 5.11   | 9.12   | 9.84   | 1.51   |
| GAIF01014830.1 | 0      | 0.07    | 0      | 0.08   | 0.18   | 0      |
| GAIF01014832.1 | 0      | 0       | 0      | 0.03   | 0      | 0.01   |
| GAIF01014833.1 | 36.08  | 13.13   | 18.03  | 86.6   | 107.49 | 174.08 |
| GAIF01014834.1 | 0      | 0       | 0      | 0      | 0.16   | 0      |
| GAIF01014837.1 | 0.16   | 0       | 0.03   | 0.3    | 0.14   | 0      |
| GAIF01014838.1 | 26.89  | 16.33   | 0      | 10.92  | 53.81  | 11.55  |
| GAIF01014839.1 | 10.94  | 8.29    | 5.95   | 19.28  | 20.8   | 5.06   |
| GAIF01014840.1 | 13.48  | 13.15   | 8.1    | 38.41  | 19.28  | 4.5    |
| GAIF01014841.1 | 0.08   | 0       | 0.18   | 0.2    | 0.89   | 0      |
| GAIF01014842.1 | 0.56   | 0.09    | 0.07   | 0.62   | 0.77   | 0      |
| GAIF01014843.1 | 11.3   | 8.1     | 13.71  | 40.76  | 56.76  | 15.14  |
| GAIF01014844.1 | 1.34   | 1.99    | 0.32   | 6.57   | 25.91  | 0.35   |
| GAIF01014845.1 | 0.53   | 1.55    | 0.48   | 10.63  | 5.6    | 2.24   |
| GAIF01014848.1 | 62.6   | 49.89   | 69.66  | 28.31  | 17.23  | 10.9   |
| GAIF01014849.1 | 0.22   | 0.45    | 0.11   | 0      | 0      | 0      |
| GAIF01014850.1 | 0.54   | 0.7     | 0.27   | 0.85   | 0.5    | 0      |
| GAIF01014851.1 | 7.04   | 4.56    | 4.01   | 23.18  | 31.84  | 5.86   |

|                |         |         |         |         |        |         |
|----------------|---------|---------|---------|---------|--------|---------|
| GAIF01014852.1 | 0.13    | 0.09    | 0.03    | 0.59    | 2.33   | 0.12    |
| GAIF01014853.1 | 8.9     | 23.95   | 22.13   | 30.59   | 18.69  | 5.45    |
| GAIF01014855.1 | 0.19    | 0.07    | 0.28    | 1.33    | 2.75   | 0       |
| GAIF01014856.1 | 160.32  | 10.63   | 11.25   | 351.06  | 884.27 | 4184.95 |
| GAIF01014857.1 | 0.46    | 0       | 0       | 0.01    | 0.15   | 0.01    |
| GAIF01014858.1 | 9.41    | 13.31   | 5.46    | 7.37    | 5.75   | 1.84    |
| GAIF01014859.1 | 0.14    | 0       | 0.15    | 0.95    | 6.87   | 0       |
| GAIF01014860.1 | 0.03    | 0       | 0       | 0       | 0      | 0       |
| GAIF01014861.1 | 0       | 0       | 0.06    | 0       | 0      | 0       |
| GAIF01014862.1 | 0       | 0       | 0       | 0.63    | 0.33   | 0       |
| GAIF01014863.1 | 3152.61 | 2096.11 | 1260.72 | 1292.77 | 668.48 | 5317.05 |
| GAIF01014865.1 | 0       | 0       | 0       | 0       | 0.3    | 0       |
| GAIF01014866.1 | 8.15    | 7.04    | 7.55    | 16.98   | 26.65  | 17.77   |
| GAIF01014867.1 | 0.2     | 0       | 0.03    | 1.2     | 5.05   | 0.29    |
| GAIF01014868.1 | 1.13    | 0.23    | 0.2     | 6.74    | 25.41  | 0.7     |
| GAIF01014869.1 | 3.31    | 2.44    | 1.04    | 4.39    | 3.56   | 0.39    |
| GAIF01014870.1 | 0.05    | 0.06    | 0.06    | 0.02    | 0.06   | 0       |
| GAIF01014871.1 | 0.46    | 0.11    | 0       | 5.93    | 25.94  | 0       |
| GAIF01014872.1 | 0.03    | 0.04    | 0       | 0       | 0      | 0       |
| GAIF01014873.1 | 0       | 0.61    | 0       | 0       | 0.03   | 0.24    |
| GAIF01014874.1 | 0.25    | 0.34    | 0.07    | 2.05    | 7.21   | 1.25    |
| GAIF01014875.1 | 0.05    | 0.97    | 0.23    | 4.35    | 8.75   | 0.06    |
| GAIF01014876.1 | 73.77   | 92.74   | 68.67   | 93.09   | 72.7   | 30.84   |
| GAIF01014877.1 | 7.56    | 9.08    | 12.17   | 15.46   | 13.85  | 3.97    |
| GAIF01014878.1 | 144.81  | 16.33   | 31.51   | 5.18    | 0      | 0       |
| GAIF01014879.1 | 4       | 13.47   | 6.68    | 0       | 0.01   | 51.24   |
| GAIF01014881.1 | 32.43   | 47.29   | 35.86   | 8.82    | 29.47  | 2.26    |
| GAIF01014882.1 | 0       | 0       | 0       | 0.38    | 1.18   | 0       |
| GAIF01014884.1 | 0       | 0       | 0       | 0       | 0.14   | 0       |
| GAIF01014885.1 | 0.3     | 1.96    | 0.18    | 0.01    | 2.17   | 0       |
| GAIF01014886.1 | 0       | 0       | 0.18    | 0.52    | 3.48   | 0.24    |
| GAIF01014887.1 | 38.14   | 39.12   | 23.64   | 61.5    | 93.28  | 77.79   |
| GAIF01014888.1 | 7.92    | 16.95   | 9.29    | 9.51    | 18.66  | 1.74    |
| GAIF01014889.1 | 12.91   | 21.94   | 20.36   | 38.9    | 21     | 5.5     |
| GAIF01014890.1 | 0       | 0       | 0       | 0.98    | 4.51   | 0       |
| GAIF01014894.1 | 8.39    | 3.43    | 3.92    | 11.18   | 9.39   | 12.45   |
| GAIF01014897.1 | 29.9    | 13.7    | 9.31    | 15.5    | 5.05   | 2.13    |
| GAIF01014898.1 | 0       | 0       | 0       | 0.31    | 0      | 0       |
| GAIF01014901.1 | 176.78  | 111.86  | 47.43   | 187.56  | 164.56 | 113.87  |
| GAIF01014902.1 | 72.11   | 132.01  | 60.9    | 128.32  | 108.06 | 15.21   |
| GAIF01014903.1 | 0.33    | 0.12    | 0.03    | 0.1     | 1.49   | 0       |
| GAIF01014904.1 | 0       | 0.12    | 0.36    | 0       | 0      | 0.48    |
| GAIF01014905.1 | 9.84    | 0.92    | 0.46    | 5.5     | 7.62   | 7.43    |
| GAIF01014906.1 | 4.72    | 4.18    | 2.32    | 0.72    | 0.6    | 0.14    |

|                |       |       |       |        |        |       |
|----------------|-------|-------|-------|--------|--------|-------|
| GAIF01014907.1 | 22.12 | 37.28 | 34.41 | 62.2   | 51.78  | 15.36 |
| GAIF01014908.1 | 0     | 0     | 0.48  | 0      | 0      | 0     |
| GAIF01014909.1 | 20.9  | 21.3  | 24.61 | 26.1   | 18.19  | 4.69  |
| GAIF01014910.1 | 0     | 0.05  | 0     | 0      | 0      | 0     |
| GAIF01014913.1 | 1.84  | 6.32  | 0.63  | 6.74   | 12.46  | 0     |
| GAIF01014915.1 | 0.04  | 0     | 0.05  | 0.15   | 0.4    | 0     |
| GAIF01014918.1 | 0     | 0     | 0.3   | 0      | 0      | 0     |
| GAIF01014919.1 | 2.12  | 8.34  | 1.47  | 5.37   | 5.14   | 0.4   |
| GAIF01014920.1 | 1.19  | 0.97  | 0.52  | 1.04   | 1.72   | 0.07  |
| GAIF01014922.1 | 0     | 0.29  | 0.29  | 0.46   | 0.16   | 0.14  |
| GAIF01014923.1 | 0     | 0     | 0.27  | 0      | 0.15   | 0     |
| GAIF01014924.1 | 0     | 0.68  | 0.34  | 0.54   | 3.36   | 2.23  |
| GAIF01014926.1 | 0     | 0     | 0     | 0      | 0.12   | 0     |
| GAIF01014928.1 | 0     | 0.06  | 0     | 0.42   | 1.08   | 0     |
| GAIF01014930.1 | 0.2   | 0.51  | 0     | 1.03   | 1.08   | 0     |
| GAIF01014931.1 | 26.99 | 40.6  | 10.89 | 53.73  | 58.37  | 0     |
| GAIF01014932.1 | 31.93 | 27.82 | 28.7  | 58.09  | 38.39  | 56.64 |
| GAIF01014933.1 | 4.62  | 1.27  | 0.2   | 3.98   | 12.39  | 1.87  |
| GAIF01014934.1 | 0.15  | 0.08  | 0     | 0.26   | 3.32   | 0.05  |
| GAIF01014935.1 | 0.38  | 0.48  | 0.25  | 1.07   | 4.87   | 0.13  |
| GAIF01014939.1 | 0     | 0     | 0     | 0      | 2.03   | 0     |
| GAIF01014940.1 | 0     | 0.31  | 0.15  | 0.65   | 2.62   | 0     |
| GAIF01014941.1 | 0     | 0.49  | 0.26  | 0.39   | 0.06   | 0     |
| GAIF01014942.1 | 0     | 0     | 0     | 0.62   | 0.86   | 0     |
| GAIF01014943.1 | 0     | 0     | 0     | 0      | 0.13   | 0     |
| GAIF01014944.1 | 0.49  | 0     | 0     | 1.69   | 9.23   | 1.87  |
| GAIF01014945.1 | 10.34 | 6.99  | 6.4   | 20.76  | 14.03  | 12.85 |
| GAIF01014947.1 | 0     | 0.01  | 0.06  | 0.04   | 0.12   | 0.02  |
| GAIF01014948.1 | 10.3  | 2.19  | 8.66  | 12.29  | 8      | 3.4   |
| GAIF01014949.1 | 1.14  | 1.41  | 0.54  | 2.26   | 0.78   | 0.45  |
| GAIF01014951.1 | 0     | 0     | 0     | 2.62   | 1.59   | 0     |
| GAIF01014952.1 | 1.62  | 0.88  | 3.26  | 3.13   | 5.19   | 2.67  |
| GAIF01014953.1 | 10.48 | 10.57 | 7.6   | 11.69  | 18.46  | 29.21 |
| GAIF01014954.1 | 0.61  | 0.17  | 0.25  | 2.83   | 2.57   | 1.68  |
| GAIF01014958.1 | 34.49 | 42.72 | 7.4   | 167.19 | 256.19 | 2     |
| GAIF01014960.1 | 6.25  | 5.73  | 2.38  | 3.75   | 3.25   | 0     |
| GAIF01014961.1 | 16.48 | 0     | 0.45  | 0      | 0.5    | 5.06  |
| GAIF01014962.1 | 0.08  | 0.11  | 0.02  | 2.79   | 13.49  | 0.18  |
| GAIF01014963.1 | 0     | 0     | 0     | 0.73   | 7.82   | 0     |
| GAIF01014964.1 | 0.23  | 0     | 0     | 0.45   | 0.22   | 0.25  |
| GAIF01014966.1 | 0.5   | 0     | 0.18  | 5.5    | 19.81  | 10.82 |
| GAIF01014969.1 | 30.91 | 20.83 | 17.36 | 8      | 3.17   | 0.78  |
| GAIF01014970.1 | 13.45 | 10.48 | 6.87  | 4.85   | 2.94   | 0.48  |
| GAIF01014971.1 | 0     | 0     | 0     | 0      | 0.14   | 0.13  |

|                |        |        |        |        |        |        |
|----------------|--------|--------|--------|--------|--------|--------|
| GAIF01014972.1 | 129.5  | 44.77  | 53.95  | 77.73  | 86.03  | 144.15 |
| GAIF01014974.1 | 0      | 1.21   | 0      | 0      | 0      | 0      |
| GAIF01014976.1 | 96.04  | 116.9  | 195.82 | 80.18  | 62.08  | 221.94 |
| GAIF01014980.1 | 0.14   | 0      | 0      | 0.25   | 1.71   | 0      |
| GAIF01014981.1 | 0      | 0      | 0      | 0.1    | 0      | 0      |
| GAIF01014983.1 | 4.46   | 3.05   | 6.02   | 19.38  | 19.62  | 6.88   |
| GAIF01014984.1 | 95.67  | 94.43  | 114.39 | 174.35 | 118.88 | 232.66 |
| GAIF01014985.1 | 0      | 0      | 0      | 0.01   | 0      | 0      |
| GAIF01014986.1 | 0.33   | 0      | 0      | 0      | 0.4    | 0      |
| GAIF01014987.1 | 6.66   | 4.91   | 6.07   | 5.5    | 3.94   | 4.11   |
| GAIF01014988.1 | 0.41   | 0.21   | 0      | 0.87   | 0.71   | 0      |
| GAIF01014989.1 | 0.62   | 1.09   | 0.42   | 0.91   | 2.54   | 0      |
| GAIF01014990.1 | 18.34  | 23.15  | 25.17  | 80.59  | 105.89 | 14.08  |
| GAIF01014991.1 | 0      | 0      | 0      | 0.5    | 4.89   | 0.1    |
| GAIF01014992.1 | 0.11   | 0      | 0      | 0      | 0      | 0      |
| GAIF01014993.1 | 2.34   | 0.17   | 0.06   | 1.1    | 2.41   | 0.99   |
| GAIF01014994.1 | 0      | 0.11   | 0      | 0      | 0.35   | 0      |
| GAIF01014995.1 | 0.1    | 0      | 0.46   | 0.12   | 0.5    | 0      |
| GAIF01014996.1 | 0      | 0      | 0      | 0.07   | 0      | 0.07   |
| GAIF01014997.1 | 1.03   | 1.05   | 0.64   | 2.77   | 6.27   | 0.14   |
| GAIF01014998.1 | 39.51  | 39.72  | 70.69  | 75.27  | 44.57  | 41.14  |
| GAIF01014999.1 | 7.34   | 12.57  | 6.64   | 23.91  | 15.29  | 2.32   |
| GAIF01015000.1 | 14.51  | 11.11  | 7.32   | 26.59  | 4.25   | 4.31   |
| GAIF01015003.1 | 0      | 0      | 0      | 0.12   | 0      | 0      |
| GAIF01015004.1 | 1.37   | 2.13   | 0.75   | 3.67   | 1.64   | 0.85   |
| GAIF01015007.1 | 0.42   | 0.14   | 0.09   | 1.56   | 10.35  | 0.21   |
| GAIF01015008.1 | 0.85   | 1.12   | 0.96   | 0.09   | 0.25   | 0.25   |
| GAIF01015009.1 | 106.58 | 127.15 | 271.09 | 132.23 | 93.64  | 159.6  |
| GAIF01015010.1 | 0      | 0      | 0      | 0.16   | 2.17   | 0      |
| GAIF01015012.1 | 6.55   | 8.9    | 10.39  | 10.35  | 9.74   | 2.61   |
| GAIF01015013.1 | 1.95   | 1.19   | 2.14   | 8.39   | 4.97   | 6.23   |
| GAIF01015014.1 | 0.49   | 0.34   | 0.1    | 0.94   | 0.54   | 0      |
| GAIF01015015.1 | 4.99   | 53.45  | 26.32  | 27.2   | 0.03   | 149.65 |
| GAIF01015016.1 | 0.93   | 0.56   | 0      | 0.77   | 0.38   | 0.06   |
| GAIF01015017.1 | 0      | 0      | 0      | 0      | 0.51   | 0      |
| GAIF01015018.1 | 0.16   | 0.04   | 0      | 0.09   | 1.37   | 0      |
| GAIF01015019.1 | 0.17   | 0      | 0      | 0.07   | 0.2    | 0      |
| GAIF01015021.1 | 0.03   | 0.07   | 0.1    | 0.04   | 0.08   | 0      |
| GAIF01015022.1 | 10.03  | 5.25   | 2.31   | 0.14   | 0.6    | 0.96   |
| GAIF01015023.1 | 0      | 0      | 0      | 0      | 0.15   | 0      |
| GAIF01015024.1 | 0.12   | 0.47   | 0.04   | 0.27   | 0.57   | 0      |
| GAIF01015026.1 | 0.65   | 2.13   | 0.72   | 3.98   | 2.94   | 1.26   |
| GAIF01015028.1 | 0      | 0      | 0      | 0      | 0.06   | 0      |
| GAIF01015029.1 | 24.63  | 21.64  | 17.36  | 13.84  | 14.83  | 10.56  |

|                |        |        |        |        |        |         |
|----------------|--------|--------|--------|--------|--------|---------|
| GAIF01015030.1 | 0.28   | 0.08   | 0      | 1.21   | 5.02   | 0.23    |
| GAIF01015031.1 | 3.08   | 3.17   | 1.45   | 5.48   | 6.62   | 0.66    |
| GAIF01015032.1 | 0.77   | 0      | 0      | 0.85   | 1.94   | 0       |
| GAIF01015033.1 | 33.42  | 39.46  | 33.54  | 69.9   | 33.29  | 20.79   |
| GAIF01015035.1 | 0.39   | 0.77   | 0.19   | 1.86   | 2.02   | 0.45    |
| GAIF01015037.1 | 0.08   | 0.05   | 0      | 1.28   | 7.5    | 0.05    |
| GAIF01015040.1 | 0.53   | 0.48   | 0.25   | 4.73   | 4.92   | 0       |
| GAIF01015041.1 | 0.11   | 0.97   | 0.25   | 0.13   | 1.75   | 0       |
| GAIF01015045.1 | 12.06  | 14.3   | 7.3    | 26.8   | 24.06  | 2.19    |
| GAIF01015046.1 | 18.19  | 19.67  | 14.01  | 24.38  | 14.85  | 6.96    |
| GAIF01015047.1 | 0      | 0.31   | 0      | 0.33   | 0.95   | 0       |
| GAIF01015048.1 | 0.23   | 0.08   | 0.04   | 0.62   | 3.76   | 0.04    |
| GAIF01015050.1 | 556.42 | 449.46 | 190.82 | 174.07 | 250.06 | 55.95   |
| GAIF01015052.1 | 0.12   | 0      | 0      | 0      | 0      | 0.04    |
| GAIF01015053.1 | 10.81  | 9.75   | 15.08  | 19.68  | 15.41  | 22.49   |
| GAIF01015054.1 | 491.68 | 127.83 | 187.32 | 242.91 | 231.94 | 1321.64 |
| GAIF01015056.1 | 0.59   | 0      | 0      | 1.88   | 4.44   | 0       |
| GAIF01015057.1 | 5.63   | 1.99   | 1.72   | 6.27   | 12.94  | 12.96   |
| GAIF01015059.1 | 0.5    | 1.26   | 0      | 0.92   | 1.33   | 0       |
| GAIF01015061.1 | 0      | 0      | 0      | 0.1    | 0      | 0       |
| GAIF01015062.1 | 0      | 0.09   | 0.09   | 0.09   | 0.29   | 0.17    |
| GAIF01015065.1 | 0      | 0      | 0      | 0      | 0      | 0.01    |
| GAIF01015066.1 | 0      | 0      | 0.05   | 0      | 0      | 0       |
| GAIF01015067.1 | 0.09   | 0      | 0      | 0      | 0.22   | 0       |
| GAIF01015068.1 | 5.5    | 6.07   | 5.61   | 18.35  | 25.44  | 5.79    |
| GAIF01015069.1 | 8.23   | 6.65   | 6.16   | 23.45  | 11.7   | 5.36    |
| GAIF01015070.1 | 23.36  | 12.98  | 9.71   | 67.68  | 25.72  | 9.82    |
| GAIF01015075.1 | 2.78   | 0.66   | 0.46   | 10.1   | 56.57  | 5.33    |
| GAIF01015076.1 | 2.26   | 0.46   | 0      | 3.28   | 15.11  | 1.09    |
| GAIF01015078.1 | 14.35  | 12.28  | 11.64  | 28.78  | 31.43  | 8.45    |
| GAIF01015080.1 | 10.99  | 4.55   | 4.96   | 35.93  | 17.35  | 0.11    |
| GAIF01015081.1 | 0.64   | 1.6    | 1.01   | 2.03   | 3.59   | 0.1     |
| GAIF01015082.1 | 30.83  | 35.84  | 43.2   | 74.89  | 53.78  | 17.45   |
| GAIF01015083.1 | 0      | 0      | 0.14   | 0      | 0      | 0       |
| GAIF01015084.1 | 4.8    | 9.75   | 5.62   | 11.45  | 6.97   | 0.95    |
| GAIF01015086.1 | 0      | 0      | 0      | 0      | 0.1    | 0       |
| GAIF01015087.1 | 2.26   | 0      | 0      | 5.56   | 20.8   | 14.92   |
| GAIF01015089.1 | 20.78  | 12.82  | 21.75  | 33.29  | 28.65  | 44.07   |
| GAIF01015090.1 | 0      | 0      | 0      | 4.66   | 0      | 2.43    |
| GAIF01015092.1 | 228.19 | 96.91  | 81.48  | 214.33 | 88.37  | 72.88   |
| GAIF01015094.1 | 1.04   | 0.14   | 0.21   | 3.38   | 23.69  | 0.29    |
| GAIF01015095.1 | 0.75   | 0.07   | 0.34   | 2.6    | 11.81  | 4.59    |
| GAIF01015096.1 | 0      | 0      | 0      | 0      | 0.06   | 0       |
| GAIF01015097.1 | 2.91   | 2.11   | 5.33   | 3.38   | 3.5    | 1.07    |

|                |       |        |       |        |        |        |
|----------------|-------|--------|-------|--------|--------|--------|
| GAIF01015099.1 | 4.05  | 2.59   | 0.49  | 23.72  | 40.81  | 0.27   |
| GAIF01015100.1 | 3.68  | 2.5    | 1.52  | 12.81  | 19.81  | 0.51   |
| GAIF01015101.1 | 0.1   | 0.09   | 0     | 0.23   | 1.3    | 0      |
| GAIF01015102.1 | 10.01 | 7.73   | 9.63  | 27.21  | 34.82  | 10.29  |
| GAIF01015103.1 | 0     | 0      | 0     | 0.24   | 0.47   | 0      |
| GAIF01015104.1 | 1.3   | 0.71   | 0.39  | 5.35   | 5.05   | 1.37   |
| GAIF01015105.1 | 0     | 0      | 0     | 0.14   | 0.29   | 0.26   |
| GAIF01015106.1 | 0.92  | 1.25   | 1.77  | 0.8    | 0      | 1.02   |
| GAIF01015107.1 | 0.12  | 0.25   | 0     | 0.67   | 3.7    | 0      |
| GAIF01015108.1 | 0     | 0      | 0     | 1.65   | 2.93   | 0      |
| GAIF01015110.1 | 53.3  | 34.21  | 31.31 | 24.35  | 17.17  | 8.44   |
| GAIF01015114.1 | 0.46  | 0.51   | 0     | 0      | 0      | 0.16   |
| GAIF01015116.1 | 0.06  | 0.07   | 0     | 0.04   | 0.08   | 0      |
| GAIF01015117.1 | 0     | 0.02   | 0     | 0      | 0.02   | 0      |
| GAIF01015118.1 | 8.91  | 15.26  | 8.7   | 10.59  | 13.16  | 4.41   |
| GAIF01015119.1 | 0     | 0      | 0.47  | 0      | 0      | 0      |
| GAIF01015121.1 | 0     | 0      | 0     | 0.31   | 1.21   | 0      |
| GAIF01015122.1 | 0.78  | 0.24   | 0.12  | 9.52   | 24.34  | 0.25   |
| GAIF01015124.1 | 0.5   | 0.14   | 0     | 0.43   | 1.19   | 0.23   |
| GAIF01015126.1 | 0.54  | 1.33   | 2.31  | 4.56   | 1.14   | 1.05   |
| GAIF01015128.1 | 12.81 | 23.4   | 22.56 | 45.72  | 42.86  | 6.39   |
| GAIF01015129.1 | 68.86 | 39.87  | 27.78 | 103.27 | 95.07  | 94.12  |
| GAIF01015130.1 | 0.02  | 0      | 0     | 0      | 0.01   | 0      |
| GAIF01015131.1 | 0.31  | 0.43   | 0     | 0.72   | 0.34   | 0      |
| GAIF01015132.1 | 0     | 0      | 0     | 0.05   | 0      | 0      |
| GAIF01015133.1 | 0.3   | 0.11   | 0     | 1.51   | 2.17   | 0      |
| GAIF01015134.1 | 0.57  | 0.1    | 0     | 2.99   | 2.75   | 0.11   |
| GAIF01015135.1 | 0     | 0      | 0     | 0.03   | 0      | 0      |
| GAIF01015136.1 | 9.64  | 0.51   | 2.4   | 37.2   | 223.29 | 146.69 |
| GAIF01015137.1 | 5.29  | 1.23   | 0.06  | 40.72  | 93.26  | 10.08  |
| GAIF01015139.1 | 0     | 0.04   | 0     | 0.63   | 0      | 0      |
| GAIF01015140.1 | 64.97 | 110.84 | 62.56 | 6.6    | 2.32   | 4.6    |
| GAIF01015142.1 | 0.34  | 0      | 0     | 2.38   | 10     | 0.38   |
| GAIF01015143.1 | 0.26  | 0      | 0.12  | 0      | 0.09   | 0      |
| GAIF01015146.1 | 4.66  | 4.32   | 2.98  | 2.52   | 0.99   | 1.18   |
| GAIF01015148.1 | 0.15  | 0      | 0     | 0.82   | 6.75   | 0.22   |
| GAIF01015149.1 | 15.03 | 13.59  | 14.76 | 21.67  | 12.18  | 8.72   |
| GAIF01015151.1 | 0.06  | 0      | 0     | 0.07   | 0.08   | 0      |
| GAIF01015152.1 | 10.92 | 3.24   | 0.26  | 2.39   | 6.21   | 4.73   |
| GAIF01015153.1 | 17.01 | 10.29  | 10.17 | 29.54  | 49.19  | 30.34  |
| GAIF01015155.1 | 27.9  | 15.3   | 28.75 | 60.29  | 107.11 | 219.84 |
| GAIF01015157.1 | 0     | 0      | 0.18  | 0      | 0      | 0      |
| GAIF01015158.1 | 0     | 0.25   | 0     | 0      | 0.31   | 0      |
| GAIF01015159.1 | 0.7   | 0.48   | 0.39  | 1.83   | 0.74   | 0.58   |

|                |         |         |         |         |         |        |
|----------------|---------|---------|---------|---------|---------|--------|
| GAIF01015160.1 | 0       | 0       | 0.09    | 0       | 0       | 0      |
| GAIF01015161.1 | 3.12    | 5.46    | 0       | 0.59    | 3.3     | 0      |
| GAIF01015162.1 | 17.29   | 28.46   | 6.71    | 49.53   | 31.3    | 1.64   |
| GAIF01015163.1 | 9.12    | 8.99    | 8.51    | 37.7    | 47.03   | 6.85   |
| GAIF01015164.1 | 1.11    | 0.75    | 0.43    | 1.01    | 1.68    | 1.57   |
| GAIF01015166.1 | 0.78    | 0.34    | 0.8     | 0.48    | 0.31    | 0.46   |
| GAIF01015167.1 | 31.17   | 28.71   | 11.31   | 3.94    | 5.47    | 2.17   |
| GAIF01015168.1 | 0       | 0.05    | 0       | 0       | 0.62    | 0.03   |
| GAIF01015171.1 | 0       | 0       | 0       | 0       | 0.19    | 0      |
| GAIF01015172.1 | 15.1    | 14.53   | 19.64   | 21.57   | 9.36    | 14.08  |
| GAIF01015174.1 | 14.52   | 5.06    | 10.96   | 16.36   | 6.02    | 16.77  |
| GAIF01015175.1 | 0.33    | 0.37    | 0.5     | 0       | 0.23    | 0.11   |
| GAIF01015176.1 | 0.04    | 0       | 0       | 0.04    | 0       | 0      |
| GAIF01015177.1 | 0       | 0       | 0       | 0.75    | 3.27    | 0.14   |
| GAIF01015178.1 | 117.7   | 14.08   | 2.25    | 8.59    | 1.73    | 3.56   |
| GAIF01015181.1 | 1.3     | 0       | 2.75    | 4.81    | 0       | 0      |
| GAIF01015183.1 | 0.51    | 0       | 0       | 0.81    | 2.64    | 1.03   |
| GAIF01015184.1 | 29.89   | 51.47   | 38.02   | 27.71   | 35.62   | 7.68   |
| GAIF01015186.1 | 0.09    | 0.24    | 0       | 0       | 0.22    | 0      |
| GAIF01015188.1 | 51.32   | 52.66   | 23.4    | 235.6   | 298.75  | 28     |
| GAIF01015190.1 | 138.63  | 84.07   | 77.62   | 97.96   | 49.58   | 65.52  |
| GAIF01015191.1 | 95.64   | 93.57   | 136.53  | 48.62   | 55.2    | 137.82 |
| GAIF01015192.1 | 0.06    | 0.07    | 0.03    | 0.11    | 0.04    | 0      |
| GAIF01015193.1 | 28.29   | 20.39   | 19.85   | 23.09   | 19.42   | 6.05   |
| GAIF01015195.1 | 0       | 0       | 0       | 0       | 0.6     | 0      |
| GAIF01015196.1 | 49.07   | 30.96   | 52.83   | 34.86   | 21.55   | 24.42  |
| GAIF01015198.1 | 19.67   | 10.65   | 11.83   | 50.57   | 65.21   | 13.59  |
| GAIF01015199.1 | 3.37    | 2.2     | 1.66    | 4.58    | 6.75    | 0      |
| GAIF01015200.1 | 8.61    | 10.75   | 7.92    | 23.19   | 21.27   | 2.66   |
| GAIF01015202.1 | 0.23    | 0.25    | 0       | 0.26    | 2.17    | 0.25   |
| GAIF01015203.1 | 0       | 0.14    | 0       | 0       | 0       | 0      |
| GAIF01015205.1 | 0       | 0       | 0       | 0.06    | 0       | 0      |
| GAIF01015206.1 | 1.75    | 2.15    | 0.38    | 1.22    | 1.4     | 0      |
| GAIF01015207.1 | 0       | 0       | 0       | 0       | 0.36    | 0      |
| GAIF01015208.1 | 0.51    | 0.45    | 1.07    | 0.7     | 1.45    | 0.36   |
| GAIF01015209.1 | 0.02    | 0.02    | 0.1     | 0.17    | 0       | 0.08   |
| GAIF01015210.1 | 105.43  | 95.6    | 81.2    | 27.29   | 16.86   | 27.24  |
| GAIF01015211.1 | 0       | 0.17    | 0       | 0.26    | 1.08    | 0      |
| GAIF01015212.1 | 213.89  | 173.76  | 114.83  | 176.76  | 177.65  | 394.47 |
| GAIF01015213.1 | 4749.08 | 5418.65 | 9745.42 | 2925.76 | 1954.33 | 7572.4 |
| GAIF01015215.1 | 113.75  | 135.3   | 158.36  | 578.61  | 279.52  | 131.7  |
| GAIF01015216.1 | 0       | 0       | 0.04    | 0       | 0.08    | 0      |
| GAIF01015218.1 | 0.59    | 0.89    | 0.13    | 0       | 0       | 0      |
| GAIF01015219.1 | 0.61    | 0.19    | 0       | 2.34    | 9.5     | 8.13   |



|                |       |       |       |        |        |       |
|----------------|-------|-------|-------|--------|--------|-------|
| GAIF01015221.1 | 0.88  | 3.56  | 2.17  | 0.21   | 0.34   | 0.17  |
| GAIF01015224.1 | 14.96 | 12.36 | 11.93 | 20.66  | 11.9   | 3.15  |
| GAIF01015227.1 | 0     | 0.42  | 0     | 1.49   | 2.09   | 0.38  |
| GAIF01015228.1 | 0     | 0     | 0     | 0.6    | 2.86   | 0     |
| GAIF01015229.1 | 0.04  | 0     | 0     | 0.42   | 2.32   | 0     |
| GAIF01015230.1 | 0     | 0     | 0     | 0      | 0      | 0.14  |
| GAIF01015231.1 | 0     | 0     | 0     | 0      | 0.06   | 0     |
| GAIF01015233.1 | 0     | 0.05  | 0.01  | 0.03   | 1.86   | 0.03  |
| GAIF01015234.1 | 0     | 0.08  | 0     | 0.18   | 0      | 0     |
| GAIF01015237.1 | 10.97 | 17.5  | 2.74  | 18.1   | 18.24  | 0.63  |
| GAIF01015238.1 | 0.14  | 0.22  | 0     | 0      | 0.17   | 0     |
| GAIF01015239.1 | 33.79 | 17.01 | 20.36 | 94.84  | 90.13  | 23.19 |
| GAIF01015240.1 | 0.16  | 0     | 0     | 0.37   | 0.95   | 0.17  |
| GAIF01015241.1 | 7.58  | 2.71  | 0.88  | 1.24   | 1.18   | 0.2   |
| GAIF01015242.1 | 10.69 | 2.25  | 1.52  | 15.85  | 22.54  | 43.35 |
| GAIF01015243.1 | 88.04 | 54.41 | 49.52 | 11.83  | 11.55  | 28.07 |
| GAIF01015244.1 | 0.05  | 0     | 0     | 0.18   | 0.92   | 0     |
| GAIF01015246.1 | 0.46  | 0.78  | 0.06  | 0.06   | 0.32   | 0.03  |
| GAIF01015248.1 | 9.42  | 10.02 | 0     | 19.43  | 18.56  | 0.87  |
| GAIF01015249.1 | 0     | 0     | 0     | 0.62   | 0.39   | 0     |
| GAIF01015250.1 | 0     | 0     | 0     | 0      | 0.12   | 0     |
| GAIF01015251.1 | 1.35  | 2.63  | 1.56  | 1.68   | 1.22   | 0.64  |
| GAIF01015252.1 | 63.2  | 66.56 | 15.12 | 34.58  | 31.08  | 5.43  |
| GAIF01015254.1 | 0     | 0     | 0     | 0.17   | 0      | 0     |
| GAIF01015255.1 | 0.37  | 0.81  | 0.27  | 3.47   | 2.84   | 0     |
| GAIF01015257.1 | 0.01  | 0     | 0.06  | 0.03   | 0      | 0     |
| GAIF01015258.1 | 0     | 0.1   | 0     | 0      | 0.11   | 0     |
| GAIF01015259.1 | 0.61  | 0.37  | 0     | 0.16   | 0.65   | 0     |
| GAIF01015261.1 | 5.67  | 6.79  | 6.06  | 21.61  | 20.38  | 4.45  |
| GAIF01015262.1 | 2.84  | 0.39  | 0.08  | 5.1    | 23.71  | 2.89  |
| GAIF01015263.1 | 1.31  | 0.36  | 0.18  | 1.52   | 2.17   | 1.27  |
| GAIF01015266.1 | 0.13  | 0.05  | 0.18  | 2.1    | 11.82  | 0.46  |
| GAIF01015268.1 | 1.8   | 0.83  | 0.97  | 0.49   | 0.14   | 0     |
| GAIF01015270.1 | 0     | 0     | 0     | 0.14   | 0      | 0     |
| GAIF01015272.1 | 0     | 0     | 0     | 0      | 0.22   | 0     |
| GAIF01015273.1 | 22.3  | 29.89 | 21.12 | 4.14   | 1.73   | 0.37  |
| GAIF01015275.1 | 16.19 | 22.51 | 10.27 | 80.75  | 32.33  | 9.49  |
| GAIF01015276.1 | 17.8  | 25.23 | 21.35 | 41.09  | 32.83  | 6.25  |
| GAIF01015277.1 | 0.04  | 0.04  | 0.12  | 0      | 0      | 0.12  |
| GAIF01015279.1 | 64.15 | 54.07 | 29.14 | 110.32 | 107.98 | 62.64 |
| GAIF01015281.1 | 60.55 | 36.47 | 28.44 | 80     | 53.37  | 14.65 |
| GAIF01015283.1 | 0.47  | 2.05  | 0.05  | 1.97   | 2.54   | 0     |
| GAIF01015285.1 | 0.61  | 0.31  | 0     | 0.29   | 0.13   | 0     |
| GAIF01015286.1 | 2.39  | 1.69  | 1.84  | 0.42   | 0.29   | 0.92  |

|                |        |        |        |        |        |        |
|----------------|--------|--------|--------|--------|--------|--------|
| GAIF01015287.1 | 1.17   | 0.47   | 1.78   | 0.97   | 0.53   | 0.46   |
| GAIF01015288.1 | 1.32   | 1.01   | 2.75   | 8.8    | 39.81  | 4.56   |
| GAIF01015289.1 | 0      | 0      | 0      | 0      | 0.29   | 0      |
| GAIF01015292.1 | 0      | 0      | 0      | 0.01   | 0      | 0      |
| GAIF01015293.1 | 0.97   | 0.78   | 0.46   | 0.89   | 0.55   | 0.67   |
| GAIF01015295.1 | 0      | 0      | 0      | 0      | 0      | 0.16   |
| GAIF01015296.1 | 4.17   | 7.74   | 3.46   | 6.22   | 2.91   | 0.42   |
| GAIF01015298.1 | 0      | 0.18   | 0      | 0      | 0.3    | 0      |
| GAIF01015299.1 | 0      | 0      | 0      | 0      | 0.12   | 0      |
| GAIF01015300.1 | 19.06  | 24.2   | 16.78  | 39.91  | 40.36  | 21.17  |
| GAIF01015301.1 | 0.19   | 0.41   | 0.1    | 0.18   | 0.41   | 0.21   |
| GAIF01015302.1 | 463.17 | 562.58 | 323.17 | 558.7  | 216.73 | 117.83 |
| GAIF01015303.1 | 0.15   | 0.12   | 0.04   | 0      | 0.45   | 0.08   |
| GAIF01015305.1 | 0      | 0.06   | 0.12   | 0      | 0.06   | 0.06   |
| GAIF01015307.1 | 0      | 0      | 0      | 0      | 0.04   | 0      |
| GAIF01015313.1 | 0      | 0      | 0      | 0      | 5.42   | 0      |
| GAIF01015314.1 | 29.89  | 22.84  | 34.27  | 47.22  | 17.44  | 29.02  |
| GAIF01015316.1 | 0.13   | 0.42   | 0.14   | 0      | 0      | 0      |
| GAIF01015317.1 | 0      | 0.05   | 0      | 0.15   | 2.75   | 0.23   |
| GAIF01015318.1 | 0      | 0      | 0      | 0      | 0      | 0.14   |
| GAIF01015319.1 | 0.6    | 0      | 0.44   | 0.58   | 0.24   | 0.56   |
| GAIF01015320.1 | 0.11   | 0.14   | 0      | 0.48   | 0.18   | 0      |
| GAIF01015321.1 | 33.3   | 60.71  | 40.71  | 169.87 | 200.05 | 40.56  |
| GAIF01015322.1 | 1.42   | 0.62   | 0      | 2.15   | 8.28   | 0.45   |
| GAIF01015324.1 | 12.13  | 8.92   | 12.08  | 17.34  | 13.38  | 7.01   |
| GAIF01015326.1 | 0      | 0      | 0      | 0.12   | 0.1    | 0      |
| GAIF01015327.1 | 0      | 0      | 0      | 0      | 0.11   | 0      |
| GAIF01015328.1 | 0      | 0      | 0.05   | 0      | 0      | 0      |
| GAIF01015329.1 | 0      | 0      | 0      | 0      | 0.11   | 0      |
| GAIF01015330.1 | 0.42   | 0      | 0      | 1.7    | 4.77   | 0.23   |
| GAIF01015331.1 | 0.27   | 0.21   | 0.1    | 0.46   | 0.53   | 0.03   |
| GAIF01015332.1 | 100.46 | 103.14 | 72.3   | 28.37  | 22.08  | 5.16   |
| GAIF01015333.1 | 0      | 0      | 0      | 0      | 0.05   | 0      |
| GAIF01015334.1 | 14.63  | 11.79  | 7.61   | 39.84  | 72.02  | 5.05   |
| GAIF01015335.1 | 0.07   | 0      | 0.16   | 0      | 0      | 0      |
| GAIF01015336.1 | 60.2   | 57.04  | 9.04   | 8.65   | 6.82   | 1.87   |
| GAIF01015337.1 | 30.86  | 35.2   | 29.41  | 42.3   | 21.18  | 14.06  |
| GAIF01015338.1 | 2.95   | 3.73   | 3.96   | 0.46   | 0.51   | 0      |
| GAIF01015339.1 | 0      | 0      | 0      | 1.78   | 1.5    | 0      |
| GAIF01015340.1 | 0      | 0      | 8.63   | 0      | 1.89   | 1.29   |
| GAIF01015342.1 | 0.92   | 0.45   | 0.26   | 1.26   | 0.73   | 0.31   |
| GAIF01015343.1 | 0      | 0      | 0      | 0      | 0.18   | 0      |
| GAIF01015344.1 | 8.96   | 11.65  | 10.17  | 33.86  | 25.77  | 4.87   |
| GAIF01015345.1 | 0.99   | 0.15   | 0.31   | 5.98   | 14.7   | 33.55  |

|                |        |        |        |         |        |        |
|----------------|--------|--------|--------|---------|--------|--------|
| GAIF01015346.1 | 76.49  | 20.71  | 31.5   | 74.87   | 59.59  | 16.12  |
| GAIF01015347.1 | 0.48   | 0.52   | 0.35   | 0       | 0.19   | 0      |
| GAIF01015349.1 | 0.89   | 0.77   | 0.79   | 6.59    | 29.18  | 0.7    |
| GAIF01015350.1 | 9.8    | 11.18  | 9.98   | 47.25   | 40.27  | 6.21   |
| GAIF01015351.1 | 1.19   | 0.34   | 0.3    | 0.86    | 0.73   | 0.45   |
| GAIF01015352.1 | 0      | 0.6    | 0      | 0       | 0      | 0.15   |
| GAIF01015353.1 | 5.07   | 6.13   | 7.53   | 5.45    | 7.11   | 3.21   |
| GAIF01015354.1 | 190.16 | 163.59 | 105.71 | 34.07   | 22.86  | 15.74  |
| GAIF01015355.1 | 4.34   | 7.94   | 2.79   | 14.7    | 83.38  | 0.6    |
| GAIF01015356.1 | 0.42   | 0.53   | 0.58   | 2.2     | 3.29   | 0.12   |
| GAIF01015357.1 | 0      | 0      | 0      | 4.02    | 7.92   | 1.72   |
| GAIF01015358.1 | 5.91   | 0.99   | 1.48   | 8.45    | 33.66  | 65.74  |
| GAIF01015359.1 | 0.47   | 0.34   | 0.69   | 0.36    | 0      | 0      |
| GAIF01015360.1 | 0      | 0      | 0      | 0       | 0.19   | 0      |
| GAIF01015361.1 | 1.93   | 0.43   | 2      | 5.21    | 13.8   | 11.74  |
| GAIF01015362.1 | 0.18   | 0.1    | 0.1    | 0       | 0      | 0      |
| GAIF01015365.1 | 0.01   | 0      | 0      | 0       | 0      | 0      |
| GAIF01015366.1 | 16.41  | 2.2    | 6.52   | 8.6     | 0.83   | 0      |
| GAIF01015367.1 | 22.42  | 18.46  | 40.82  | 59.35   | 44.07  | 33.65  |
| GAIF01015368.1 | 0.54   | 1.17   | 0      | 2.44    | 1.26   | 17.49  |
| GAIF01015369.1 | 38.91  | 27.89  | 37.04  | 79.98   | 56.99  | 56.4   |
| GAIF01015370.1 | 0      | 0      | 0      | 0       | 0.52   | 0      |
| GAIF01015374.1 | 10.6   | 6.89   | 5.81   | 19.88   | 33.83  | 6.22   |
| GAIF01015376.1 | 39.12  | 12.56  | 14.31  | 21.28   | 20.12  | 8.21   |
| GAIF01015379.1 | 0.93   | 0.19   | 0.17   | 0.94    | 2.75   | 1.48   |
| GAIF01015380.1 | 0.45   | 0      | 0.1    | 0       | 0      | 0      |
| GAIF01015381.1 | 18.79  | 15.92  | 4.41   | 14.71   | 24.26  | 0      |
| GAIF01015382.1 | 176.6  | 83.74  | 48.82  | 128.26  | 132.84 | 52.52  |
| GAIF01015383.1 | 95.62  | 84.64  | 72.81  | 188.47  | 116.51 | 73.47  |
| GAIF01015384.1 | 2.93   | 7.68   | 26.92  | 10.21   | 34.62  | 116.04 |
| GAIF01015385.1 | 28.28  | 42.92  | 55.06  | 3.42    | 1.25   | 1.15   |
| GAIF01015389.1 | 50.17  | 21.65  | 12.87  | 94.87   | 93.08  | 65.75  |
| GAIF01015393.1 | 0      | 0.08   | 0      | 0.26    | 1.89   | 0.16   |
| GAIF01015395.1 | 1.31   | 1.16   | 1.33   | 0.96    | 0.76   | 1.97   |
| GAIF01015397.1 | 58.38  | 44.32  | 22.98  | 157.01  | 178.47 | 53.79  |
| GAIF01015398.1 | 0.91   | 0      | 0      | 3.3     | 19.41  | 0.13   |
| GAIF01015399.1 | 0.74   | 0.36   | 0.27   | 1.81    | 3.2    | 0.41   |
| GAIF01015401.1 | 0      | 0      | 0.14   | 0       | 0      | 0      |
| GAIF01015404.1 | 1.61   | 0.68   | 0      | 2.75    | 2.21   | 0.73   |
| GAIF01015405.1 | 1.31   | 1.58   | 0.96   | 1.01    | 0.35   | 0.32   |
| GAIF01015406.1 | 1.85   | 2.68   | 0.56   | 8.59    | 20.39  | 0      |
| GAIF01015407.1 | 19.16  | 31.81  | 41.64  | 49.13   | 28.43  | 13.08  |
| GAIF01015409.1 | 0.61   | 0.42   | 0.28   | 2.57    | 9.86   | 0.51   |
| GAIF01015411.1 | 215.01 | 241.2  | 347.25 | 1539.41 | 774.35 | 387.44 |

|                |        |        |        |        |        |        |
|----------------|--------|--------|--------|--------|--------|--------|
| GAIF01015412.1 | 0.35   | 0.06   | 0      | 1.12   | 8.04   | 1.09   |
| GAIF01015413.1 | 4.64   | 2.18   | 1.05   | 2.29   | 13.11  | 35.99  |
| GAIF01015415.1 | 0      | 0      | 0      | 0      | 0      | 0.86   |
| GAIF01015417.1 | 1.47   | 0.35   | 0.05   | 1.17   | 1.58   | 0.87   |
| GAIF01015418.1 | 17.41  | 26.71  | 15.45  | 48.32  | 35.93  | 7.76   |
| GAIF01015419.1 | 552.32 | 210.67 | 120.44 | 304.03 | 173.19 | 263.12 |
| GAIF01015420.1 | 0      | 0.14   | 0      | 0      | 0      | 0      |
| GAIF01015421.1 | 0.47   | 0.14   | 0.05   | 0.7    | 0.21   | 0.09   |
| GAIF01015422.1 | 9.12   | 5.58   | 6.46   | 7.73   | 4.56   | 3.04   |
| GAIF01015425.1 | 3.8    | 2.85   | 3.97   | 11.76  | 4.9    | 3.09   |
| GAIF01015426.1 | 0.05   | 0.06   | 0.23   | 0      | 0      | 0      |
| GAIF01015427.1 | 11.59  | 13.31  | 5.06   | 37.7   | 30.43  | 3.9    |
| GAIF01015428.1 | 0.31   | 1.36   | 1.2    | 0.73   | 0.19   | 0      |
| GAIF01015430.1 | 2.05   | 0.9    | 0      | 6.43   | 6.73   | 0.06   |
| GAIF01015435.1 | 3.89   | 7.37   | 1.97   | 10.03  | 13.67  | 0.09   |
| GAIF01015436.1 | 0.15   | 0      | 0      | 0.42   | 0      | 0      |
| GAIF01015437.1 | 0      | 0.05   | 0      | 0      | 0      | 0      |
| GAIF01015438.1 | 0.55   | 0.15   | 0.46   | 2.41   | 10.8   | 0.15   |
| GAIF01015439.1 | 1.04   | 0      | 0      | 2.81   | 4.46   | 1.25   |
| GAIF01015441.1 | 0      | 0.43   | 0.25   | 0      | 0      | 0      |
| GAIF01015442.1 | 124.61 | 168.6  | 70.13  | 340.36 | 243.92 | 20.85  |
| GAIF01015443.1 | 0.33   | 0.24   | 0      | 1.8    | 4.54   | 0      |
| GAIF01015444.1 | 5      | 5.79   | 5.24   | 2.96   | 1.87   | 1.59   |
| GAIF01015447.1 | 8.75   | 4.89   | 2.21   | 19.63  | 29.58  | 2.22   |
| GAIF01015448.1 | 0      | 0      | 0      | 0.21   | 0      | 0      |
| GAIF01015449.1 | 0      | 0.05   | 0.05   | 0      | 0.05   | 0.1    |
| GAIF01015450.1 | 46.93  | 47.63  | 35     | 96.51  | 51.21  | 10.93  |
| GAIF01015451.1 | 0      | 0.31   | 0.24   | 0      | 0      | 0      |
| GAIF01015452.1 | 103.26 | 43.71  | 0.07   | 59.19  | 84.11  | 0.01   |
| GAIF01015453.1 | 1.99   | 1.24   | 1.82   | 0.97   | 0      | 0.69   |
| GAIF01015454.1 | 0      | 0      | 0      | 0      | 0.01   | 0      |
| GAIF01015455.1 | 0.3    | 0      | 0      | 0.24   | 0      | 0      |
| GAIF01015456.1 | 10.88  | 4.08   | 1.69   | 11.13  | 12.19  | 9.62   |
| GAIF01015457.1 | 0.48   | 0.21   | 0.1    | 4.1    | 24.1   | 0.42   |
| GAIF01015458.1 | 0      | 0.48   | 0      | 0.03   | 0.71   | 0      |
| GAIF01015459.1 | 0      | 0      | 0.03   | 0.01   | 0      | 0      |
| GAIF01015461.1 | 0      | 0      | 0      | 0      | 22.68  | 32.6   |
| GAIF01015462.1 | 0      | 0      | 0      | 0      | 0.02   | 0      |
| GAIF01015465.1 | 6.73   | 5.78   | 4.47   | 26.34  | 25.73  | 2.33   |
| GAIF01015466.1 | 37.87  | 39.4   | 49.95  | 33.62  | 20.97  | 16.51  |
| GAIF01015468.1 | 14.89  | 14.76  | 9.52   | 10.06  | 6.8    | 2.6    |
| GAIF01015469.1 | 0      | 0      | 0      | 0      | 0.19   | 0      |
| GAIF01015470.1 | 0      | 0      | 0      | 0      | 1.49   | 0      |
| GAIF01015477.1 | 0      | 0.25   | 0.13   | 0      | 0.14   | 0.13   |

|                |        |        |         |        |        |        |
|----------------|--------|--------|---------|--------|--------|--------|
| GAIF01015478.1 | 1190.5 | 711.49 | 1053.28 | 586.25 | 311.02 | 533.52 |
| GAIF01015479.1 | 0.01   | 0.06   | 0       | 0.1    | 1.08   | 0      |
| GAIF01015480.1 | 5.77   | 7.51   | 6.71    | 13.4   | 6.53   | 4.12   |
| GAIF01015481.1 | 7.61   | 0      | 0       | 11.85  | 10.56  | 6.23   |
| GAIF01015482.1 | 0.24   | 0.13   | 0       | 0.14   | 0.14   | 0      |
| GAIF01015484.1 | 0      | 0      | 0       | 0      | 0.27   | 0      |
| GAIF01015486.1 | 0      | 0.21   | 0       | 0.23   | 0.71   | 0      |
| GAIF01015487.1 | 1      | 2.46   | 1.24    | 2.31   | 0.65   | 0.2    |
| GAIF01015488.1 | 6.83   | 5.15   | 1.68    | 22.81  | 30.43  | 0.69   |
| GAIF01015489.1 | 0.15   | 0.11   | 0       | 0.06   | 0.93   | 0      |
| GAIF01015490.1 | 0      | 0      | 0       | 0      | 0.22   | 0      |
| GAIF01015491.1 | 154.34 | 225.87 | 153.41  | 40.69  | 47.73  | 21.41  |
| GAIF01015493.1 | 0.02   | 0.08   | 0       | 0.22   | 0.88   | 0      |
| GAIF01015494.1 | 2.94   | 0      | 0       | 2.81   | 0.55   | 0      |
| GAIF01015495.1 | 12.69  | 21.27  | 16.11   | 1.3    | 2.39   | 2.86   |
| GAIF01015496.1 | 8.58   | 3.18   | 1.38    | 15.17  | 30.18  | 1.04   |
| GAIF01015497.1 | 79.96  | 17.49  | 27.02   | 74.01  | 74.56  | 134.2  |
| GAIF01015498.1 | 0.16   | 0.17   | 0       | 0.56   | 0.39   | 0.18   |
| GAIF01015500.1 | 55.93  | 56.39  | 72.84   | 27.14  | 17.07  | 12.32  |
| GAIF01015502.1 | 0.38   | 0      | 0       | 3.58   | 12.57  | 0.99   |
| GAIF01015504.1 | 0.04   | 0.07   | 0.04    | 0      | 0      | 0.15   |
| GAIF01015505.1 | 0.12   | 0      | 0       | 0.85   | 3.09   | 0      |
| GAIF01015506.1 | 0      | 0      | 0.01    | 0      | 0      | 0      |
| GAIF01015509.1 | 0.6    | 0.47   | 0       | 2.2    | 12.1   | 3.85   |
| GAIF01015510.1 | 0.21   | 0      | 0.23    | 0.98   | 1.14   | 0.23   |
| GAIF01015512.1 | 0      | 0.61   | 0.51    | 0.22   | 0      | 0.31   |
| GAIF01015515.1 | 0      | 0      | 0       | 0.09   | 0      | 0      |
| GAIF01015516.1 | 0.28   | 0      | 0       | 24.81  | 0      | 1.86   |
| GAIF01015517.1 | 1.1    | 0.31   | 0.15    | 2.75   | 12.44  | 0.8    |
| GAIF01015519.1 | 0.46   | 0      | 0       | 2.11   | 9.65   | 0.32   |
| GAIF01015520.1 | 30.8   | 8.49   | 8.84    | 30.93  | 40.35  | 0      |
| GAIF01015521.1 | 10.99  | 12.84  | 9.09    | 58.48  | 66.12  | 9.6    |
| GAIF01015524.1 | 0      | 0      | 0       | 0      | 0.27   | 0      |
| GAIF01015525.1 | 0      | 0      | 0       | 0      | 0.09   | 0      |
| GAIF01015526.1 | 0      | 0      | 0       | 0      | 0.22   | 0      |
| GAIF01015527.1 | 1.19   | 0      | 0       | 1.87   | 4.12   | 2.48   |
| GAIF01015528.1 | 13.06  | 4.84   | 4.24    | 21.7   | 11.42  | 12.59  |
| GAIF01015529.1 | 0      | 0.27   | 0       | 0.23   | 0      | 0.16   |
| GAIF01015531.1 | 2.68   | 3.31   | 4.82    | 15.28  | 7      | 2.38   |
| GAIF01015532.1 | 7.91   | 11.65  | 5.18    | 47.94  | 47.8   | 4.25   |
| GAIF01015533.1 | 0.16   | 0.28   | 0       | 0.42   | 0.64   | 0.38   |
| GAIF01015536.1 | 0.12   | 0.26   | 0.13    | 1.41   | 2.05   | 0.27   |
| GAIF01015538.1 | 1.18   | 0.46   | 0       | 3.42   | 21.08  | 0.93   |
| GAIF01015539.1 | 22.21  | 16.54  | 4.05    | 12.22  | 12.48  | 16.68  |

|                |        |        |        |        |        |        |
|----------------|--------|--------|--------|--------|--------|--------|
| GAIF01015540.1 | 0      | 0.46   | 0.11   | 0.56   | 0      | 0.48   |
| GAIF01015541.1 | 0.98   | 5.32   | 1.25   | 7.76   | 9.02   | 0.18   |
| GAIF01015542.1 | 4.87   | 18.98  | 0.33   | 10.8   | 14.13  | 0      |
| GAIF01015543.1 | 0      | 0.03   | 0      | 0.06   | 0.05   | 0      |
| GAIF01015544.1 | 82.64  | 56.62  | 49.41  | 60.17  | 52.11  | 8.12   |
| GAIF01015545.1 | 5.25   | 3.16   | 3.65   | 10.43  | 18.56  | 10.86  |
| GAIF01015547.1 | 0.12   | 0.11   | 0      | 0.18   | 0      | 0.03   |
| GAIF01015549.1 | 17.45  | 15.78  | 5.7    | 27.14  | 44.02  | 0      |
| GAIF01015550.1 | 151.12 | 71.82  | 103.67 | 151.8  | 70.78  | 19.6   |
| GAIF01015552.1 | 0      | 0.11   | 0.22   | 0      | 0.24   | 0      |
| GAIF01015553.1 | 4.03   | 4.48   | 1.33   | 5.4    | 1.46   | 0.12   |
| GAIF01015555.1 | 0      | 0.33   | 0      | 0.17   | 1.09   | 0      |
| GAIF01015556.1 | 5.41   | 0.44   | 0      | 0      | 0      | 0      |
| GAIF01015558.1 | 52.85  | 439.25 | 93.56  | 0      | 8.96   | 6.64   |
| GAIF01015561.1 | 5.47   | 5.94   | 4.57   | 4.79   | 6.78   | 1.4    |
| GAIF01015563.1 | 0      | 0      | 0      | 0      | 0      | 0.01   |
| GAIF01015564.1 | 124.92 | 59.02  | 69.05  | 203.38 | 135.32 | 59.98  |
| GAIF01015565.1 | 0.04   | 0.19   | 0.02   | 0.02   | 0.05   | 0.01   |
| GAIF01015567.1 | 0.13   | 0      | 0      | 0.05   | 0      | 0.02   |
| GAIF01015569.1 | 0      | 0      | 0.14   | 0.25   | 0.78   | 0      |
| GAIF01015571.1 | 0      | 0.14   | 0.3    | 0      | 0.26   | 0      |
| GAIF01015572.1 | 0      | 0      | 0      | 0      | 0.07   | 0      |
| GAIF01015574.1 | 0      | 0      | 0.23   | 0      | 0      | 0      |
| GAIF01015575.1 | 22.86  | 18.93  | 22.68  | 117.55 | 66.25  | 94.86  |
| GAIF01015576.1 | 0      | 0.06   | 0.02   | 0.28   | 0.57   | 0.06   |
| GAIF01015577.1 | 3.18   | 10.83  | 0.17   | 14.59  | 36.27  | 8.58   |
| GAIF01015580.1 | 0.02   | 0      | 0.07   | 0      | 0.04   | 0      |
| GAIF01015581.1 | 4.92   | 3.27   | 2.25   | 29.31  | 60.99  | 1.13   |
| GAIF01015582.1 | 1.64   | 0.71   | 0      | 3.55   | 13.29  | 0.6    |
| GAIF01015583.1 | 0.17   | 0.16   | 0      | 0      | 0      | 0.51   |
| GAIF01015585.1 | 0      | 0      | 0      | 0.09   | 0      | 0      |
| GAIF01015586.1 | 130.34 | 52.49  | 49.13  | 84.88  | 99.2   | 149.71 |
| GAIF01015587.1 | 12.66  | 5.58   | 9.21   | 11.92  | 8.64   | 11.5   |
| GAIF01015588.1 | 0.33   | 0      | 0      | 1.16   | 6.29   | 0.98   |
| GAIF01015589.1 | 5.81   | 3.33   | 5.57   | 15.47  | 20.36  | 11.04  |
| GAIF01015590.1 | 2.36   | 1.74   | 0.3    | 5.74   | 11.79  | 0.09   |
| GAIF01015591.1 | 0.15   | 0      | 0.08   | 0      | 0      | 0      |
| GAIF01015592.1 | 0      | 0      | 0.76   | 0      | 0      | 0      |
| GAIF01015594.1 | 0      | 0      | 0      | 1.01   | 5.45   | 0.1    |
| GAIF01015596.1 | 0.95   | 0.78   | 0.39   | 0      | 0      | 0      |
| GAIF01015598.1 | 46.81  | 22.46  | 5.11   | 126.95 | 158.97 | 18.57  |
| GAIF01015599.1 | 65.39  | 28.13  | 26.56  | 69.05  | 113.68 | 157.19 |
| GAIF01015601.1 | 48.08  | 50.95  | 27.93  | 54.28  | 50.78  | 26.95  |
| GAIF01015602.1 | 0.13   | 0.02   | 0      | 0.34   | 0.66   | 0      |

|                |         |        |        |       |       |       |
|----------------|---------|--------|--------|-------|-------|-------|
| GAIF01015603.1 | 0       | 0      | 0      | 0.7   | 1.27  | 0.27  |
| GAIF01015605.1 | 0       | 0      | 0      | 0     | 0.03  | 0     |
| GAIF01015606.1 | 12.08   | 10.07  | 12.14  | 15.45 | 30.32 | 26.19 |
| GAIF01015610.1 | 0.02    | 0      | 0      | 0     | 0.51  | 0.06  |
| GAIF01015611.1 | 0.07    | 0      | 0      | 0.73  | 2.14  | 0     |
| GAIF01015613.1 | 1.71    | 0.93   | 0.12   | 1.11  | 2.18  | 0     |
| GAIF01015614.1 | 155.2   | 49.46  | 52.69  | 11.12 | 7.5   | 5.74  |
| GAIF01015615.1 | 0.21    | 0      | 0      | 0.64  | 0.01  | 0     |
| GAIF01015616.1 | 0.73    | 2.06   | 0      | 2.97  | 9.89  | 0     |
| GAIF01015618.1 | 0.08    | 0      | 0      | 0     | 0     | 0.04  |
| GAIF01015619.1 | 7.23    | 4.9    | 1.34   | 12.86 | 28.01 | 3.52  |
| GAIF01015620.1 | 0       | 0      | 0      | 0     | 0.02  | 0     |
| GAIF01015622.1 | 0       | 0      | 0      | 0.08  | 0.06  | 0     |
| GAIF01015623.1 | 62.49   | 25.92  | 101.5  | 41.92 | 17.86 | 81.08 |
| GAIF01015624.1 | 0       | 0      | 0.27   | 0.7   | 0     | 0.02  |
| GAIF01015627.1 | 0.03    | 0.02   | 0      | 0.11  | 0.03  | 0     |
| GAIF01015628.1 | 0       | 2.92   | 0      | 0     | 0     | 0     |
| GAIF01015630.1 | 0       | 0      | 0      | 0.91  | 7.19  | 0.24  |
| GAIF01015631.1 | 0.41    | 0      | 0      | 0.24  | 0.17  | 0     |
| GAIF01015632.1 | 0       | 0.2    | 0      | 0     | 0.23  | 0     |
| GAIF01015633.1 | 4.7     | 5.26   | 10.2   | 0.37  | 0     | 0.27  |
| GAIF01015634.1 | 0.67    | 0.73   | 1.19   | 4.79  | 5.27  | 5.46  |
| GAIF01015635.1 | 30.01   | 32.45  | 43.55  | 40.02 | 31.22 | 24.65 |
| GAIF01015636.1 | 4.42    | 0.99   | 0.43   | 3.87  | 6.96  | 0     |
| GAIF01015637.1 | 2138.63 | 733.48 | 973.9  | 40.4  | 37.98 | 38.87 |
| GAIF01015639.1 | 15.85   | 17.92  | 13.29  | 25.83 | 38.71 | 73.8  |
| GAIF01015642.1 | 0.27    | 0.15   | 0      | 1.27  | 1.97  | 0     |
| GAIF01015644.1 | 18.17   | 11.8   | 10.04  | 15.84 | 29.88 | 30.1  |
| GAIF01015645.1 | 0.17    | 0      | 0      | 0     | 0     | 0     |
| GAIF01015646.1 | 0.31    | 0.1    | 0      | 0.05  | 0     | 0     |
| GAIF01015647.1 | 24.63   | 26.5   | 12.58  | 53.29 | 29.27 | 8.78  |
| GAIF01015648.1 | 5.62    | 6.14   | 5.69   | 10.94 | 17.02 | 27.1  |
| GAIF01015649.1 | 0       | 0      | 0.11   | 0.17  | 0.12  | 0     |
| GAIF01015652.1 | 0       | 0.12   | 0      | 0     | 0     | 0     |
| GAIF01015655.1 | 0       | 0.33   | 0      | 0.18  | 0     | 0     |
| GAIF01015657.1 | 0.04    | 0.04   | 0      | 0     | 0.14  | 0     |
| GAIF01015658.1 | 156.81  | 313.29 | 193.75 | 41.05 | 33.59 | 12.51 |
| GAIF01015659.1 | 21.07   | 8.79   | 4.69   | 2.55  | 1.45  | 0.76  |
| GAIF01015660.1 | 0       | 0      | 0      | 0     | 0     | 0.06  |
| GAIF01015662.1 | 0.11    | 0      | 0.12   | 0     | 0     | 0     |
| GAIF01015663.1 | 0.06    | 0      | 0      | 0     | 1.6   | 0     |
| GAIF01015664.1 | 0.26    | 0.28   | 0.7    | 0.15  | 0.31  | 0.57  |
| GAIF01015665.1 | 76.1    | 47.6   | 24.28  | 76.46 | 58.45 | 13.39 |
| GAIF01015666.1 | 2.31    | 0.16   | 0      | 7.89  | 18.79 | 0.64  |

|                |        |       |        |        |        |       |
|----------------|--------|-------|--------|--------|--------|-------|
| GAIF01015667.1 | 0      | 0     | 0      | 0      | 0.12   | 0     |
| GAIF01015669.1 | 0      | 0.23  | 0.24   | 1.99   | 8.26   | 0.24  |
| GAIF01015670.1 | 25.39  | 23.53 | 13.86  | 57.5   | 56.88  | 7.21  |
| GAIF01015672.1 | 0      | 0.03  | 0      | 0.03   | 0.19   | 0.03  |
| GAIF01015674.1 | 11.1   | 20.78 | 12.72  | 42.4   | 37.13  | 3.41  |
| GAIF01015675.1 | 1.57   | 0.16  | 0.16   | 8.77   | 23.32  | 5.43  |
| GAIF01015676.1 | 40.7   | 73.26 | 15.01  | 97.1   | 82.27  | 4.72  |
| GAIF01015677.1 | 3.84   | 3.45  | 2.88   | 3.69   | 2.06   | 0.77  |
| GAIF01015678.1 | 0.13   | 0     | 0      | 0.05   | 0      | 0     |
| GAIF01015679.1 | 0      | 0.4   | 0.27   | 0      | 0      | 0     |
| GAIF01015681.1 | 9.99   | 13.91 | 6.33   | 32.26  | 38.68  | 2.46  |
| GAIF01015683.1 | 5.12   | 2.34  | 0.3    | 14.22  | 38.78  | 5.34  |
| GAIF01015684.1 | 1.32   | 0.96  | 0.53   | 7.6    | 10.09  | 0.69  |
| GAIF01015685.1 | 22.87  | 30.76 | 66.12  | 24.82  | 35     | 37.29 |
| GAIF01015686.1 | 0.08   | 0     | 0      | 0      | 0.1    | 0     |
| GAIF01015687.1 | 0.14   | 0     | 0      | 0      | 1.69   | 0     |
| GAIF01015688.1 | 0.26   | 0     | 0      | 0      | 0.68   | 0     |
| GAIF01015689.1 | 0.18   | 0.06  | 0      | 0.97   | 4.89   | 0.02  |
| GAIF01015691.1 | 1.37   | 0     | 0      | 1.01   | 4.94   | 0     |
| GAIF01015692.1 | 39.13  | 29.34 | 35.56  | 82.7   | 124.87 | 64.1  |
| GAIF01015693.1 | 0      | 0     | 0      | 0      | 1.49   | 0     |
| GAIF01015694.1 | 0      | 0     | 0      | 0.34   | 1.24   | 0     |
| GAIF01015695.1 | 0.13   | 0.25  | 0.06   | 1.84   | 6.32   | 0.16  |
| GAIF01015697.1 | 7.7    | 2.86  | 1.26   | 41.24  | 106.87 | 9.14  |
| GAIF01015698.1 | 12.33  | 10.72 | 2.82   | 14.92  | 23.45  | 34.56 |
| GAIF01015699.1 | 0.3    | 0.18  | 0      | 1.58   | 8.56   | 0.07  |
| GAIF01015700.1 | 5.8    | 6.1   | 7.11   | 5.42   | 4.8    | 2.74  |
| GAIF01015701.1 | 0      | 0     | 0      | 0      | 0      | 0.03  |
| GAIF01015704.1 | 17.83  | 16.75 | 9.46   | 43.73  | 51.74  | 6.99  |
| GAIF01015705.1 | 0      | 0     | 0      | 0.15   | 0.63   | 0     |
| GAIF01015707.1 | 102.11 | 123.5 | 128.43 | 106.53 | 71.52  | 57.84 |
| GAIF01015710.1 | 0      | 0.05  | 0      | 0.95   | 4.16   | 0     |
| GAIF01015711.1 | 0      | 0     | 0      | 0.11   | 0.87   | 0     |
| GAIF01015712.1 | 0      | 1.8   | 0      | 0.38   | 0      | 0     |
| GAIF01015713.1 | 12.77  | 4.89  | 7.8    | 16.84  | 16.05  | 49.73 |
| GAIF01015716.1 | 17.13  | 5.99  | 3.73   | 11.12  | 7.19   | 1.65  |
| GAIF01015719.1 | 2.44   | 0.7   | 0.44   | 2.83   | 11.49  | 5.1   |
| GAIF01015720.1 | 76.43  | 0.14  | 5.42   | 86.06  | 32.11  | 5.44  |
| GAIF01015723.1 | 0.18   | 0     | 0      | 0      | 0      | 0     |
| GAIF01015724.1 | 0      | 0     | 0      | 0.47   | 1.22   | 0     |
| GAIF01015725.1 | 0      | 0     | 0      | 0.35   | 1.21   | 0.06  |
| GAIF01015728.1 | 17.62  | 22.89 | 21.29  | 52.24  | 22.87  | 8.52  |
| GAIF01015730.1 | 3.57   | 3.14  | 1.85   | 1.04   | 0.83   | 1.5   |
| GAIF01015731.1 | 9.13   | 7.38  | 3.36   | 4.99   | 5.34   | 1.63  |



|                |        |        |        |        |        |       |
|----------------|--------|--------|--------|--------|--------|-------|
| GAIF01015732.1 | 5.81   | 8.55   | 18.07  | 18.72  | 11.72  | 15.43 |
| GAIF01015734.1 | 140.83 | 119.39 | 48.32  | 159.34 | 79.07  | 6.46  |
| GAIF01015735.1 | 57.69  | 53.21  | 54.36  | 104.4  | 45.36  | 18.92 |
| GAIF01015736.1 | 0      | 0.08   | 0      | 0.43   | 2.05   | 0     |
| GAIF01015737.1 | 2.27   | 3.68   | 1.75   | 4.77   | 2.21   | 0.16  |
| GAIF01015739.1 | 10.57  | 7.01   | 2.55   | 8.73   | 18.43  | 4.92  |
| GAIF01015741.1 | 126.55 | 145.74 | 194.98 | 156.48 | 106.92 | 34.78 |
| GAIF01015742.1 | 311.78 | 422.6  | 862.1  | 33.91  | 20.31  | 91.22 |
| GAIF01015743.1 | 0.09   | 0.3    | 0      | 0.75   | 2      | 0     |
| GAIF01015744.1 | 0      | 0      | 0.01   | 0      | 0      | 0     |
| GAIF01015745.1 | 0.33   | 0.23   | 0      | 0      | 0.23   | 0     |
| GAIF01015746.1 | 82.13  | 14.36  | 4.83   | 98.66  | 394.51 | 73.11 |
| GAIF01015747.1 | 0.18   | 0      | 0      | 0      | 1.63   | 0.1   |
| GAIF01015748.1 | 4.13   | 3.5    | 1.46   | 11.47  | 16.6   | 1.7   |
| GAIF01015749.1 | 0.04   | 0      | 0      | 0.15   | 0.16   | 0     |
| GAIF01015750.1 | 10.82  | 16.15  | 11.69  | 24.44  | 24.83  | 5.54  |
| GAIF01015751.1 | 0.39   | 0.84   | 0.12   | 1.18   | 1.45   | 0     |
| GAIF01015754.1 | 0      | 0      | 0      | 0.5    | 1.77   | 0     |
| GAIF01015755.1 | 61.2   | 53.01  | 19.13  | 85.21  | 75.44  | 3.79  |
| GAIF01015756.1 | 0.07   | 8.24   | 27.24  | 0.39   | 2.43   | 4.53  |
| GAIF01015757.1 | 8.05   | 10.24  | 7.52   | 30.4   | 36.8   | 4.39  |
| GAIF01015758.1 | 4.79   | 2.77   | 4.07   | 4.3    | 5.05   | 1.53  |
| GAIF01015759.1 | 0.19   | 0      | 0      | 1.12   | 2.88   | 0     |
| GAIF01015760.1 | 13.19  | 10.37  | 5.23   | 30.82  | 34.37  | 26.02 |
| GAIF01015761.1 | 15.78  | 1.78   | 0.56   | 80.13  | 316.85 | 32.92 |
| GAIF01015762.1 | 0      | 0.1    | 0      | 0.04   | 0.02   | 0.04  |
| GAIF01015763.1 | 19.38  | 36.3   | 19.18  | 19.54  | 39.83  | 40.2  |
| GAIF01015764.1 | 0.23   | 0.44   | 0      | 0.09   | 0.21   | 0     |
| GAIF01015765.1 | 15.48  | 8.93   | 12.92  | 8.5    | 7.29   | 7.23  |
| GAIF01015766.1 | 24.6   | 13.05  | 6.22   | 34     | 24.83  | 23.66 |
| GAIF01015767.1 | 0.09   | 0      | 0      | 0      | 0      | 0     |
| GAIF01015769.1 | 0      | 0      | 0      | 0      | 0.18   | 0     |
| GAIF01015771.1 | 43.57  | 46.24  | 12.15  | 79.85  | 74.33  | 9.53  |
| GAIF01015772.1 | 0.14   | 0      | 0      | 0.26   | 0.11   | 0.11  |
| GAIF01015776.1 | 12.85  | 18.16  | 17.61  | 45.83  | 39.21  | 4.64  |
| GAIF01015782.1 | 0      | 0      | 0      | 0      | 0.15   | 0     |
| GAIF01015783.1 | 23.26  | 16.7   | 16.45  | 38.17  | 47.61  | 17.52 |
| GAIF01015784.1 | 0.17   | 0.36   | 0      | 1.15   | 3.77   | 0     |
| GAIF01015786.1 | 0      | 0      | 0      | 0.02   | 0.02   | 0     |
| GAIF01015788.1 | 6.57   | 8.79   | 8.83   | 20.16  | 10.61  | 3.86  |
| GAIF01015789.1 | 0.97   | 1.05   | 0.06   | 6.8    | 24.25  | 0     |
| GAIF01015790.1 | 0      | 23.86  | 24.29  | 0      | 0.11   | 2.07  |
| GAIF01015791.1 | 0      | 0.09   | 0      | 0.05   | 0      | 0     |
| GAIF01015792.1 | 0.06   | 0      | 0      | 0      | 0      | 0     |

|                |        |        |         |        |        |        |
|----------------|--------|--------|---------|--------|--------|--------|
| GAIF01015793.1 | 0.14   | 0      | 0       | 0.08   | 0.08   | 0      |
| GAIF01015794.1 | 0.39   | 0.85   | 1       | 1.36   | 0.94   | 0.43   |
| GAIF01015795.1 | 13.15  | 6.1    | 4.3     | 8.04   | 9.12   | 9.02   |
| GAIF01015796.1 | 62.7   | 59.57  | 32.85   | 0      | 0.09   | 0      |
| GAIF01015797.1 | 0      | 0.14   | 0.15    | 0      | 0      | 0      |
| GAIF01015798.1 | 0      | 20.32  | 11.54   | 12.5   | 19.27  | 2.92   |
| GAIF01015799.1 | 0.18   | 0.05   | 0       | 0.14   | 0.13   | 0      |
| GAIF01015800.1 | 0.29   | 0.44   | 0.9     | 0.47   | 0.21   | 0.51   |
| GAIF01015801.1 | 1.8    | 2.68   | 0       | 0      | 0.35   | 0      |
| GAIF01015802.1 | 0      | 0      | 0       | 0.12   | 0.37   | 0.22   |
| GAIF01015803.1 | 0      | 0      | 0       | 0      | 0.12   | 0      |
| GAIF01015804.1 | 0.63   | 0.81   | 0.56    | 4.63   | 12     | 0.69   |
| GAIF01015805.1 | 0.11   | 0.12   | 0.12    | 1.05   | 6.55   | 0      |
| GAIF01015807.1 | 4      | 2.44   | 2.97    | 7.6    | 5.93   | 3.04   |
| GAIF01015808.1 | 0.12   | 0.13   | 0       | 0.86   | 1.49   | 0.54   |
| GAIF01015809.1 | 19.88  | 30.01  | 31.76   | 114.97 | 167.61 | 26.7   |
| GAIF01015810.1 | 0      | 0      | 0       | 0.29   | 2.33   | 0.06   |
| GAIF01015811.1 | 0.01   | 0      | 0.11    | 0.05   | 0.04   | 0.05   |
| GAIF01015812.1 | 0      | 0      | 0       | 0      | 0.06   | 0      |
| GAIF01015813.1 | 0.07   | 0.15   | 0.2     | 0.07   | 0.04   | 0      |
| GAIF01015815.1 | 0.85   | 0.09   | 0.09    | 0.1    | 0.2    | 0.09   |
| GAIF01015816.1 | 12.92  | 10.07  | 16.18   | 33.84  | 28.34  | 19.45  |
| GAIF01015817.1 | 400.76 | 563.62 | 1157.25 | 208.52 | 223.7  | 650.79 |
| GAIF01015819.1 | 11.55  | 8.01   | 12.5    | 21.57  | 7.58   | 23.91  |
| GAIF01015820.1 | 0.48   | 0.38   | 0.56    | 2.15   | 5.09   | 0.78   |
| GAIF01015821.1 | 0      | 0      | 0       | 0.17   | 1.21   | 0      |
| GAIF01015822.1 | 0.89   | 0.16   | 0       | 0.34   | 4.49   | 0.16   |
| GAIF01015825.1 | 62.23  | 97.94  | 91.98   | 62.71  | 43.41  | 16.64  |
| GAIF01015826.1 | 0      | 0      | 0       | 0      | 0.32   | 0.1    |
| GAIF01015827.1 | 0      | 0.02   | 0.02    | 0      | 0      | 0      |
| GAIF01015829.1 | 0      | 0      | 0       | 0      | 0.21   | 0      |
| GAIF01015830.1 | 0      | 0      | 0       | 0      | 0.07   | 0      |
| GAIF01015831.1 | 0.63   | 0      | 0.62    | 0.25   | 0.23   | 0.19   |
| GAIF01015832.1 | 1.99   | 0.83   | 0.32    | 0.17   | 0.04   | 0.04   |
| GAIF01015833.1 | 33.76  | 13.98  | 17.56   | 26.31  | 9.96   | 2.92   |
| GAIF01015834.1 | 0.11   | 0      | 0       | 0.13   | 0.14   | 0      |
| GAIF01015836.1 | 3.42   | 2.36   | 0.13    | 6.89   | 14.69  | 1.79   |
| GAIF01015837.1 | 56.15  | 66.23  | 99.79   | 2.13   | 2.2    | 9.37   |
| GAIF01015839.1 | 0      | 0      | 0       | 0      | 10.72  | 0      |
| GAIF01015842.1 | 20.84  | 26.77  | 36.78   | 117.17 | 79.73  | 21.52  |
| GAIF01015843.1 | 0.26   | 0.28   | 0.12    | 0.64   | 5.45   | 0.16   |
| GAIF01015845.1 | 12.01  | 18.6   | 15.17   | 45.39  | 27.35  | 7.5    |
| GAIF01015848.1 | 0.19   | 0.1    | 0.1     | 2.59   | 3.69   | 0.31   |
| GAIF01015849.1 | 12.94  | 11.06  | 5.63    | 24.75  | 23.77  | 12.78  |

|                |        |        |        |         |        |         |
|----------------|--------|--------|--------|---------|--------|---------|
| GAIF01015850.1 | 11.06  | 16.72  | 23.5   | 1.99    | 0.46   | 1.4     |
| GAIF01015852.1 | 34.61  | 3.97   | 4.96   | 31.24   | 17.46  | 58.91   |
| GAIF01015853.1 | 0      | 0      | 0.06   | 0.07    | 0      | 0       |
| GAIF01015854.1 | 14.42  | 10.26  | 9.16   | 17.21   | 5.35   | 7.07    |
| GAIF01015855.1 | 0      | 0      | 0      | 0.1     | 0.11   | 0       |
| GAIF01015856.1 | 3.86   | 6.57   | 1.66   | 5.45    | 2.83   | 0       |
| GAIF01015858.1 | 62.61  | 55.18  | 85.88  | 146.28  | 77.42  | 102.77  |
| GAIF01015859.1 | 85.93  | 21.84  | 14.7   | 78.56   | 63.83  | 8.98    |
| GAIF01015860.1 | 0.05   | 0.03   | 0.08   | 0       | 0      | 0       |
| GAIF01015862.1 | 2.09   | 0.18   | 0.18   | 7.48    | 26.93  | 17.4    |
| GAIF01015864.1 | 0.93   | 0.27   | 0.07   | 9.83    | 30.11  | 0.27    |
| GAIF01015865.1 | 0.1    | 0      | 0      | 0.77    | 3.38   | 0.07    |
| GAIF01015866.1 | 129.74 | 133.54 | 96.62  | 205.15  | 141.37 | 71.19   |
| GAIF01015867.1 | 0      | 0.11   | 0      | 0       | 0.38   | 0       |
| GAIF01015869.1 | 0.2    | 0      | 0      | 0.87    | 1.96   | 0       |
| GAIF01015870.1 | 0.06   | 0.1    | 0.11   | 0.04    | 0      | 0       |
| GAIF01015874.1 | 2.06   | 1.61   | 1.68   | 6.67    | 7.94   | 1.57    |
| GAIF01015875.1 | 0      | 0      | 0      | 0.83    | 2.34   | 0       |
| GAIF01015877.1 | 0.48   | 1.46   | 1.08   | 5.09    | 2.91   | 0.3     |
| GAIF01015878.1 | 0      | 0      | 0      | 0.26    | 0.27   | 0       |
| GAIF01015879.1 | 0.12   | 0      | 0.06   | 0.2     | 0.83   | 0.26    |
| GAIF01015880.1 | 0      | 0      | 0      | 0.05    | 0.32   | 0       |
| GAIF01015882.1 | 0      | 0      | 0      | 0.14    | 1.02   | 0       |
| GAIF01015883.1 | 0      | 0      | 0      | 0.56    | 1.73   | 0       |
| GAIF01015885.1 | 3.36   | 1.36   | 2.27   | 6.33    | 9.85   | 1.66    |
| GAIF01015886.1 | 0.39   | 0.21   | 0.21   | 1.23    | 10.52  | 1.06    |
| GAIF01015887.1 | 0      | 0.32   | 0      | 0.37    | 2.09   | 0.43    |
| GAIF01015888.1 | 2.73   | 2.3    | 1.38   | 2.42    | 2.25   | 0.51    |
| GAIF01015889.1 | 0.19   | 0.4    | 0      | 0.21    | 1.1    | 0.35    |
| GAIF01015890.1 | 0      | 0      | 0      | 0       | 2.89   | 0       |
| GAIF01015891.1 | 0      | 0.14   | 0      | 0       | 0      | 0       |
| GAIF01015892.1 | 0.41   | 0      | 0      | 2.66    | 4.72   | 0.18    |
| GAIF01015893.1 | 0.4    | 0.07   | 0.05   | 1.95    | 8.33   | 0.5     |
| GAIF01015894.1 | 0      | 0      | 0.22   | 0.28    | 2.4    | 1.55    |
| GAIF01015895.1 | 0.13   | 0      | 0.07   | 0       | 0      | 0       |
| GAIF01015897.1 | 0.18   | 0.16   | 0.18   | 0.41    | 0.29   | 0.56    |
| GAIF01015898.1 | 0      | 0.07   | 0.07   | 0       | 0      | 0.07    |
| GAIF01015899.1 | 0      | 0.4    | 0      | 0.08    | 0      | 0       |
| GAIF01015900.1 | 0      | 0.21   | 0      | 0       | 0.12   | 0       |
| GAIF01015901.1 | 290.78 | 284.23 | 225.57 | 485.59  | 333.92 | 103.86  |
| GAIF01015903.1 | 17.74  | 25.53  | 20.05  | 70.86   | 45.19  | 11.39   |
| GAIF01015904.1 | 2840.9 | 107.99 | 304.77 | 1848.83 | 257.75 | 2072.98 |
| GAIF01015906.1 | 0.35   | 0      | 0      | 5.86    | 33     | 0.14    |
| GAIF01015907.1 | 0.33   | 0.42   | 0.61   | 0.81    | 1.4    | 0       |

|                |         |         |        |         |         |          |
|----------------|---------|---------|--------|---------|---------|----------|
| GAIF01015908.1 | 0       | 0       | 0      | 0       | 0       | 0.29     |
| GAIF01015909.1 | 3.58    | 6.16    | 7.33   | 16.06   | 8.29    | 1.77     |
| GAIF01015910.1 | 12.34   | 19.43   | 6.9    | 42.63   | 28.08   | 3.86     |
| GAIF01015911.1 | 2.87    | 2.28    | 0.99   | 19.15   | 58.88   | 0.74     |
| GAIF01015913.1 | 0.03    | 0       | 0      | 0       | 0       | 0        |
| GAIF01015914.1 | 0.86    | 0       | 0.41   | 2.32    | 3.59    | 0.48     |
| GAIF01015915.1 | 0.08    | 0       | 0      | 0.49    | 3.85    | 0.37     |
| GAIF01015917.1 | 14.15   | 5.29    | 16.61  | 4.44    | 0.82    | 8.61     |
| GAIF01015918.1 | 0       | 0.32    | 0      | 0.23    | 0.12    | 0        |
| GAIF01015920.1 | 0       | 0       | 0      | 0       | 0.19    | 0        |
| GAIF01015921.1 | 17.54   | 8.55    | 12.09  | 29.91   | 16      | 58.67    |
| GAIF01015922.1 | 30.12   | 48.74   | 50.36  | 118.72  | 61.51   | 26.04    |
| GAIF01015924.1 | 6.42    | 3.09    | 7.05   | 17.49   | 8.91    | 16.48    |
| GAIF01015925.1 | 0       | 0       | 0      | 0.12    | 0.73    | 0        |
| GAIF01015926.1 | 0       | 0       | 0      | 0.1     | 1.12    | 0        |
| GAIF01015927.1 | 0.13    | 0       | 0      | 0.31    | 1.69    | 0.05     |
| GAIF01015930.1 | 0.04    | 0       | 0.09   | 0.18    | 2.11    | 0.04     |
| GAIF01015934.1 | 10.93   | 8.2     | 17.24  | 19.25   | 11.93   | 27.14    |
| GAIF01015935.1 | 0       | 20.75   | 14.23  | 22.78   | 38.01   | 5.81     |
| GAIF01015937.1 | 0.13    | 0.14    | 0      | 0.89    | 3.38    | 0.14     |
| GAIF01015938.1 | 1.82    | 1.29    | 0.54   | 3.53    | 0.89    | 0.79     |
| GAIF01015940.1 | 0.98    | 0.4     | 0.67   | 0.85    | 0.15    | 0.4      |
| GAIF01015941.1 | 0       | 0       | 0      | 0.14    | 0       | 0        |
| GAIF01015942.1 | 0.1     | 0.05    | 0.05   | 1.32    | 3.62    | 0        |
| GAIF01015943.1 | 0       | 0       | 6.71   | 1.23    | 0       | 0        |
| GAIF01015944.1 | 0.05    | 0       | 0      | 0       | 0       | 0        |
| GAIF01015947.1 | 0       | 0       | 0      | 0.14    | 0.29    | 0        |
| GAIF01015948.1 | 7.05    | 9.73    | 4.36   | 25.27   | 17.93   | 1.39     |
| GAIF01015949.1 | 0.7     | 0       | 0      | 1.77    | 0       | 0        |
| GAIF01015950.1 | 50.23   | 39.49   | 33.24  | 66.24   | 59.37   | 31.01    |
| GAIF01015952.1 | 7.61    | 7.51    | 7.23   | 16.59   | 26.95   | 3.02     |
| GAIF01015953.1 | 12.49   | 25.75   | 13.71  | 48.7    | 46.18   | 5.2      |
| GAIF01015954.1 | 2.78    | 5.59    | 1.43   | 2.56    | 3.44    | 0        |
| GAIF01015956.1 | 7.48    | 8.8     | 3.76   | 20.89   | 21.87   | 3.25     |
| GAIF01015957.1 | 0.37    | 0.64    | 1.29   | 0       | 0       | 1.92     |
| GAIF01015958.1 | 0.05    | 0.06    | 0      | 0.06    | 0       | 0        |
| GAIF01015959.1 | 1.05    | 0.11    | 0.17   | 6.7     | 23.13   | 0.95     |
| GAIF01015961.1 | 0.15    | 0.08    | 0      | 0.38    | 1.86    | 0        |
| GAIF01015963.1 | 0       | 0.46    | 0.34   | 0       | 0       | 0        |
| GAIF01015964.1 | 0       | 0.19    | 0      | 0       | 0       | 0        |
| GAIF01015966.1 | 18.39   | 23.48   | 48.66  | 26.39   | 19.73   | 36.93    |
| GAIF01015967.1 | 2979.48 | 1531.89 | 1570.7 | 1548.73 | 1765.06 | 12907.66 |
| GAIF01015968.1 | 2.72    | 1.85    | 3.49   | 0.28    | 0.11    | 0.25     |
| GAIF01015969.1 | 23.53   | 21.58   | 37.65  | 33.25   | 33.66   | 44.28    |

|                |       |       |        |        |        |       |
|----------------|-------|-------|--------|--------|--------|-------|
| GAIF01015970.1 | 5.04  | 5.22  | 4.81   | 21.68  | 27.27  | 3.47  |
| GAIF01015971.1 | 9.1   | 9.79  | 10.43  | 22.89  | 17.81  | 3.05  |
| GAIF01015973.1 | 10.38 | 8.47  | 9.93   | 13.74  | 11.23  | 11.99 |
| GAIF01015976.1 | 0.2   | 0.07  | 0      | 0      | 0.16   | 0.22  |
| GAIF01015977.1 | 0.14  | 0.15  | 0.05   | 2.68   | 9.43   | 0.13  |
| GAIF01015978.1 | 1.68  | 5.48  | 2.71   | 2.18   | 1.43   | 0.11  |
| GAIF01015979.1 | 30.84 | 46.93 | 44.16  | 111.87 | 206.48 | 12.48 |
| GAIF01015985.1 | 0.53  | 0.08  | 0.12   | 2.95   | 5.05   | 0.08  |
| GAIF01015986.1 | 0.35  | 0.02  | 0.29   | 0      | 0.26   | 0     |
| GAIF01015989.1 | 0.35  | 0.2   | 0      | 1.45   | 13.95  | 0     |
| GAIF01015990.1 | 44.4  | 33.45 | 29.25  | 15.62  | 3.08   | 21.13 |
| GAIF01015991.1 | 36.47 | 28.76 | 15.79  | 136.56 | 139.09 | 16.85 |
| GAIF01015992.1 | 35.14 | 22.42 | 11.52  | 80.63  | 102.06 | 8.55  |
| GAIF01015993.1 | 0.38  | 0.13  | 0.27   | 0.66   | 0.15   | 0.37  |
| GAIF01015994.1 | 0.09  | 0     | 0      | 0      | 0.1    | 0     |
| GAIF01015995.1 | 0     | 0     | 0      | 0      | 0.22   | 0     |
| GAIF01015996.1 | 0.13  | 0     | 0      | 0.41   | 0      | 0.11  |
| GAIF01015998.1 | 2.06  | 5.35  | 4.33   | 14.79  | 14.92  | 3.02  |
| GAIF01016001.1 | 0     | 0.32  | 0.66   | 0.35   | 4.43   | 0.11  |
| GAIF01016003.1 | 0     | 0     | 0.12   | 0      | 0      | 0     |
| GAIF01016004.1 | 28.14 | 41.73 | 30.26  | 51.41  | 57.09  | 13.52 |
| GAIF01016007.1 | 0.06  | 0     | 0      | 0      | 0      | 0     |
| GAIF01016008.1 | 0     | 0.07  | 0.04   | 0.23   | 1.41   | 0.04  |
| GAIF01016009.1 | 5.07  | 1.8   | 3.08   | 28.88  | 54.53  | 3.05  |
| GAIF01016011.1 | 46.18 | 63.8  | 24.77  | 136.84 | 112.96 | 22.91 |
| GAIF01016012.1 | 12.31 | 16.12 | 10.07  | 30.17  | 16.92  | 5.08  |
| GAIF01016013.1 | 0     | 0.15  | 0      | 2.26   | 14.66  | 0.09  |
| GAIF01016014.1 | 0.73  | 0.28  | 0.99   | 0.62   | 0.21   | 0.21  |
| GAIF01016015.1 | 0     | 0     | 0      | 0      | 0.3    | 0     |
| GAIF01016016.1 | 0.03  | 0.05  | 0.05   | 0.08   | 0.06   | 0.04  |
| GAIF01016017.1 | 73.34 | 98.05 | 198.64 | 96.05  | 49.43  | 48.85 |
| GAIF01016018.1 | 3.52  | 2.05  | 0.25   | 4.22   | 8.53   | 1.02  |
| GAIF01016019.1 | 0     | 0     | 0      | 0      | 0.56   | 0     |
| GAIF01016021.1 | 0     | 0     | 0      | 0.07   | 0      | 0     |
| GAIF01016022.1 | 2.52  | 1.89  | 3.91   | 4.72   | 3.29   | 1     |
| GAIF01016023.1 | 3.72  | 1.31  | 0      | 5.2    | 21.05  | 11.09 |
| GAIF01016024.1 | 0.86  | 0.44  | 0.74   | 7.07   | 16.38  | 0.12  |
| GAIF01016025.1 | 0     | 0.27  | 0      | 0      | 0.15   | 0.14  |
| GAIF01016027.1 | 0     | 0     | 0      | 0.19   | 0.58   | 0     |
| GAIF01016028.1 | 0     | 0.59  | 0      | 0      | 0      | 0     |
| GAIF01016029.1 | 0     | 0.07  | 0      | 0      | 0      | 0     |
| GAIF01016030.1 | 26.83 | 56.79 | 27.19  | 108.25 | 209.88 | 32.85 |
| GAIF01016031.1 | 0     | 0     | 0      | 0.1    | 0.21   | 0     |
| GAIF01016032.1 | 0.08  | 0.25  | 0.26   | 0.14   | 0      | 0     |

|                |        |        |       |        |        |       |
|----------------|--------|--------|-------|--------|--------|-------|
| GAIF01016033.1 | 11.43  | 6.04   | 0     | 40.79  | 46.56  | 7.77  |
| GAIF01016034.1 | 9.94   | 6.56   | 8.64  | 20.79  | 26.23  | 6.4   |
| GAIF01016035.1 | 0.32   | 0.28   | 0.56  | 0      | 0      | 0.07  |
| GAIF01016036.1 | 0      | 0      | 0     | 0      | 0.07   | 0     |
| GAIF01016037.1 | 7.31   | 13.16  | 10.35 | 18.86  | 7.04   | 2.33  |
| GAIF01016039.1 | 56.26  | 16.81  | 10.77 | 28.85  | 19.45  | 15.06 |
| GAIF01016041.1 | 10.86  | 13.89  | 7.54  | 12.91  | 22.91  | 5.87  |
| GAIF01016045.1 | 0.25   | 0      | 0     | 0      | 0.34   | 0     |
| GAIF01016046.1 | 1.37   | 0.46   | 0.23  | 3.54   | 10.5   | 0.46  |
| GAIF01016047.1 | 2.67   | 2.61   | 2.15  | 6.81   | 5.14   | 1.96  |
| GAIF01016049.1 | 227.41 | 435.99 | 191   | 548.11 | 442.02 | 64.9  |
| GAIF01016050.1 | 0      | 0.55   | 1.26  | 0      | 0      | 0.24  |
| GAIF01016053.1 | 0.17   | 0.03   | 0.05  | 0.82   | 4.62   | 0.37  |
| GAIF01016054.1 | 1.45   | 0.15   | 0.25  | 0.68   | 1.45   | 0     |
| GAIF01016055.1 | 11.34  | 5.6    | 7.88  | 27.78  | 29.86  | 9.77  |
| GAIF01016056.1 | 3.51   | 3.31   | 2.66  | 4.02   | 3.92   | 1.41  |
| GAIF01016057.1 | 0.07   | 0      | 0     | 0      | 0      | 0.16  |
| GAIF01016058.1 | 5.5    | 3.33   | 2.42  | 0.18   | 0.47   | 0.17  |
| GAIF01016059.1 | 0      | 0      | 0.37  | 0      | 0      | 0     |
| GAIF01016062.1 | 0.22   | 0      | 0     | 0      | 0      | 0     |
| GAIF01016064.1 | 34.97  | 35.78  | 0     | 99.07  | 38.34  | 17    |
| GAIF01016065.1 | 0      | 0      | 0     | 0.11   | 0.22   | 0.05  |
| GAIF01016066.1 | 0.31   | 0.71   | 0.47  | 0.85   | 0.47   | 0     |
| GAIF01016068.1 | 0      | 0.7    | 0.38  | 0      | 0      | 0     |
| GAIF01016069.1 | 45.81  | 88.84  | 73.05 | 62.81  | 40.31  | 19.92 |
| GAIF01016070.1 | 0.62   | 0.97   | 1.73  | 0.95   | 1.11   | 0.83  |
| GAIF01016071.1 | 4.21   | 0.46   | 0     | 1.59   | 2.02   | 5.91  |
| GAIF01016073.1 | 0      | 0      | 0     | 56.54  | 0.2    | 0     |
| GAIF01016074.1 | 0.34   | 0.37   | 0     | 0.26   | 5.59   | 0.25  |
| GAIF01016075.1 | 0.28   | 0.05   | 0.05  | 1.82   | 11.18  | 0.31  |
| GAIF01016077.1 | 1.87   | 0.76   | 0.26  | 9.34   | 25.82  | 1.03  |
| GAIF01016078.1 | 0.19   | 0.1    | 0.1   | 0.33   | 1.26   | 0     |
| GAIF01016081.1 | 0.1    | 0      | 0.18  | 0.37   | 0.69   | 0.1   |
| GAIF01016082.1 | 0.73   | 4.82   | 0     | 12.5   | 22.4   | 13.66 |
| GAIF01016084.1 | 0      | 0      | 0     | 0.2    | 0      | 0     |
| GAIF01016085.1 | 0.11   | 0      | 0     | 0.53   | 0.99   | 0     |
| GAIF01016087.1 | 0.03   | 0.04   | 0.02  | 0.13   | 0.13   | 0     |
| GAIF01016088.1 | 0      | 0      | 0     | 0.12   | 0.5    | 0     |
| GAIF01016089.1 | 0      | 0.11   | 0.02  | 0.02   | 0.01   | 0.01  |
| GAIF01016090.1 | 0      | 0      | 0     | 0.05   | 0.45   | 0     |
| GAIF01016093.1 | 0      | 0.14   | 0     | 0      | 0.31   | 0     |
| GAIF01016094.1 | 0.21   | 0.23   | 0     | 0      | 0.13   | 0     |
| GAIF01016098.1 | 16.95  | 29.18  | 22.41 | 24.53  | 20.89  | 10.71 |
| GAIF01016100.1 | 2.63   | 0.36   | 0.72  | 3.05   | 1.98   | 1.38  |

|                |        |        |        |        |        |        |
|----------------|--------|--------|--------|--------|--------|--------|
| GAIF01016101.1 | 3.73   | 0.08   | 0.16   | 7.13   | 40.7   | 0.48   |
| GAIF01016102.1 | 2.91   | 1.81   | 1.93   | 7.35   | 32.05  | 3.57   |
| GAIF01016104.1 | 0      | 0      | 0      | 1.6    | 2.24   | 0      |
| GAIF01016105.1 | 0      | 0      | 0      | 0.09   | 0      | 0      |
| GAIF01016108.1 | 118.49 | 33.76  | 1.03   | 12.5   | 11.38  | 0      |
| GAIF01016109.1 | 0      | 0      | 0      | 0.25   | 0.14   | 0      |
| GAIF01016111.1 | 0      | 0      | 0      | 1.02   | 6.41   | 0.16   |
| GAIF01016112.1 | 0.18   | 0      | 0.07   | 0.49   | 1.88   | 0      |
| GAIF01016113.1 | 1.69   | 2.1    | 0      | 6.44   | 22.62  | 0      |
| GAIF01016116.1 | 0.87   | 0.49   | 0.34   | 3.02   | 14.84  | 0.25   |
| GAIF01016119.1 | 0.11   | 0.25   | 0      | 0      | 0.28   | 0      |
| GAIF01016120.1 | 2.17   | 1.56   | 0.11   | 11.93  | 36.9   | 0.11   |
| GAIF01016121.1 | 1.05   | 0.31   | 0.31   | 4.41   | 19.44  | 0.52   |
| GAIF01016122.1 | 10.54  | 52.5   | 32.12  | 24.55  | 80.42  | 15.77  |
| GAIF01016124.1 | 2.18   | 1.05   | 0      | 10.4   | 7.57   | 0      |
| GAIF01016125.1 | 0      | 0      | 0      | 0.05   | 0      | 0      |
| GAIF01016126.1 | 0      | 0      | 0      | 0.02   | 0      | 0      |
| GAIF01016127.1 | 0.22   | 0      | 0      | 0      | 0.26   | 0      |
| GAIF01016129.1 | 10.61  | 11.89  | 7.56   | 21.62  | 21.63  | 12.5   |
| GAIF01016130.1 | 0      | 0.22   | 0.11   | 0      | 0      | 0.22   |
| GAIF01016131.1 | 1.81   | 5      | 7.21   | 2.1    | 2.76   | 1.63   |
| GAIF01016132.1 | 7.67   | 1.02   | 0.31   | 16.29  | 63.13  | 71.67  |
| GAIF01016134.1 | 0.38   | 1.75   | 1.09   | 1.6    | 1.75   | 0.84   |
| GAIF01016135.1 | 0      | 0      | 0      | 0      | 0.05   | 0      |
| GAIF01016136.1 | 0      | 0.19   | 0      | 0      | 0      | 0      |
| GAIF01016137.1 | 12.6   | 13.72  | 15.61  | 30.63  | 35.48  | 11.09  |
| GAIF01016138.1 | 0      | 0      | 1.81   | 0      | 0      | 0      |
| GAIF01016139.1 | 0      | 0.08   | 0      | 0.24   | 0.23   | 0      |
| GAIF01016141.1 | 0      | 0.26   | 0      | 0      | 0      | 0.13   |
| GAIF01016142.1 | 0      | 0.05   | 0      | 0.35   | 1.06   | 0      |
| GAIF01016143.1 | 0      | 0      | 0.03   | 0      | 0.27   | 0      |
| GAIF01016144.1 | 0.32   | 0.17   | 0.24   | 0.35   | 0      | 0.43   |
| GAIF01016145.1 | 10.56  | 19.08  | 12.46  | 31.7   | 17.77  | 5.38   |
| GAIF01016146.1 | 1.49   | 2.21   | 3.27   | 2.51   | 0.98   | 0.75   |
| GAIF01016147.1 | 0.13   | 0      | 0      | 0.22   | 1.52   | 0.49   |
| GAIF01016149.1 | 0      | 0      | 0      | 0      | 1.46   | 0      |
| GAIF01016152.1 | 13.11  | 42.77  | 0      | 45.65  | 15.77  | 14.45  |
| GAIF01016153.1 | 0      | 0      | 0      | 0      | 0.09   | 0      |
| GAIF01016154.1 | 0.09   | 0      | 0      | 0      | 0      | 0      |
| GAIF01016155.1 | 4.73   | 7.02   | 6.82   | 11.23  | 12.33  | 2.54   |
| GAIF01016157.1 | 238.78 | 140.44 | 101.29 | 193.77 | 193.91 | 126.07 |
| GAIF01016158.1 | 93.54  | 96.17  | 50.69  | 126.68 | 100.92 | 15.87  |
| GAIF01016160.1 | 0      | 0      | 0      | 0      | 0.12   | 0      |
| GAIF01016161.1 | 0.15   | 0.55   | 0      | 0      | 0      | 0      |

|                |         |        |        |        |        |        |
|----------------|---------|--------|--------|--------|--------|--------|
| GAIF01016165.1 | 0       | 0      | 0      | 0.11   | 0      | 0      |
| GAIF01016166.1 | 16.39   | 7.13   | 0      | 7.61   | 7.88   | 3.61   |
| GAIF01016167.1 | 0.2     | 0      | 0.22   | 0.46   | 0      | 0.22   |
| GAIF01016168.1 | 0       | 0      | 0      | 0.06   | 0.31   | 0      |
| GAIF01016170.1 | 8.31    | 12.82  | 21.52  | 36.78  | 24.28  | 9.99   |
| GAIF01016171.1 | 0.49    | 0.84   | 0.06   | 2.72   | 5.46   | 0      |
| GAIF01016172.1 | 0.18    | 0.07   | 0      | 0.27   | 1.45   | 0.12   |
| GAIF01016173.1 | 13.22   | 24.32  | 22.65  | 55.85  | 46.03  | 3.91   |
| GAIF01016176.1 | 0       | 0      | 0      | 0      | 0.24   | 0      |
| GAIF01016177.1 | 11.35   | 1.98   | 1.15   | 32.11  | 75.75  | 3.83   |
| GAIF01016178.1 | 0       | 0      | 0      | 0.08   | 0.24   | 0.04   |
| GAIF01016179.1 | 344.3   | 496.14 | 592.52 | 321.89 | 291.31 | 293.01 |
| GAIF01016180.1 | 47.6    | 42.88  | 28.27  | 22.53  | 34.39  | 5.38   |
| GAIF01016183.1 | 0.44    | 0      | 0      | 0.08   | 0.18   | 0      |
| GAIF01016184.1 | 0.94    | 0      | 0      | 0      | 0      | 0      |
| GAIF01016185.1 | 0.1     | 0.22   | 0.34   | 0.24   | 0.12   | 0      |
| GAIF01016187.1 | 29.83   | 20.83  | 21.57  | 26.64  | 21.96  | 11.73  |
| GAIF01016188.1 | 42.33   | 90.8   | 56.84  | 154.27 | 156.47 | 16.84  |
| GAIF01016191.1 | 2.7     | 1.82   | 0.87   | 0.22   | 0.34   | 0.05   |
| GAIF01016192.1 | 0.14    | 0.15   | 0      | 0      | 1.36   | 0      |
| GAIF01016193.1 | 0.31    | 0.17   | 0.26   | 0.36   | 0.28   | 0.09   |
| GAIF01016194.1 | 0.24    | 0      | 0      | 0.69   | 5.15   | 0.13   |
| GAIF01016195.1 | 0.12    | 0.2    | 0.07   | 0.43   | 0.81   | 0.41   |
| GAIF01016197.1 | 45.23   | 51.36  | 75.58  | 58.17  | 24.78  | 33.09  |
| GAIF01016198.1 | 0.14    | 0.39   | 0      | 0      | 0.28   | 0.09   |
| GAIF01016200.1 | 1120.08 | 690.43 | 349.82 | 627.39 | 521.45 | 453.26 |
| GAIF01016201.1 | 2.37    | 2.71   | 0.21   | 5.6    | 5.38   | 0.49   |
| GAIF01016202.1 | 41.37   | 44.19  | 75.61  | 123.67 | 57.13  | 75.11  |
| GAIF01016203.1 | 0       | 0      | 0      | 0.07   | 0.07   | 0      |
| GAIF01016204.1 | 0       | 0      | 0      | 0      | 0.17   | 0      |
| GAIF01016206.1 | 1.74    | 1.34   | 3.97   | 1.73   | 1.52   | 1.45   |
| GAIF01016207.1 | 0.23    | 0      | 0.04   | 0.23   | 0.65   | 0      |
| GAIF01016209.1 | 0       | 0      | 0      | 0      | 1.03   | 0      |
| GAIF01016210.1 | 1       | 0.52   | 1.82   | 1.23   | 0.09   | 0.9    |
| GAIF01016212.1 | 1.72    | 0.84   | 0.27   | 0.98   | 0.12   | 0.98   |
| GAIF01016213.1 | 0       | 0.03   | 0      | 0      | 0      | 0      |
| GAIF01016214.1 | 73.92   | 75.38  | 60.32  | 101.12 | 80.35  | 27.65  |
| GAIF01016215.1 | 0       | 0.62   | 0      | 0.45   | 0.27   | 0.28   |
| GAIF01016216.1 | 0.53    | 0      | 0      | 0.31   | 1.12   | 4.1    |
| GAIF01016217.1 | 0.14    | 0      | 0.08   | 0      | 0      | 0.08   |
| GAIF01016218.1 | 0       | 0      | 0.41   | 1.53   | 0      | 0.18   |
| GAIF01016219.1 | 2.73    | 1.09   | 0.3    | 8.67   | 25.21  | 2.11   |
| GAIF01016223.1 | 45.93   | 70.36  | 69.51  | 96.05  | 50.96  | 22.27  |
| GAIF01016224.1 | 0.13    | 0      | 0      | 1.35   | 6.62   | 0      |



|                |         |        |        |        |        |        |
|----------------|---------|--------|--------|--------|--------|--------|
| GAIF01016226.1 | 0       | 0.11   | 0      | 0      | 0      | 0      |
| GAIF01016227.1 | 0.02    | 0.04   | 0.02   | 0.04   | 0.02   | 0      |
| GAIF01016228.1 | 3       | 1.93   | 0.46   | 13.13  | 15.62  | 9.06   |
| GAIF01016229.1 | 0       | 0      | 0      | 0      | 0.24   | 0      |
| GAIF01016230.1 | 0.08    | 0.16   | 0.08   | 0.18   | 0.91   | 0.04   |
| GAIF01016231.1 | 85.74   | 86.11  | 32.79  | 171.11 | 171.91 | 15.49  |
| GAIF01016233.1 | 13.1    | 7.4    | 6.2    | 18.64  | 13.21  | 8.31   |
| GAIF01016234.1 | 0       | 18.27  | 21.37  | 0      | 0      | 16.84  |
| GAIF01016235.1 | 0.22    | 0.12   | 0.71   | 0      | 0.13   | 0      |
| GAIF01016236.1 | 0       | 0      | 0      | 0.3    | 0.42   | 0      |
| GAIF01016238.1 | 20.38   | 19.22  | 17.33  | 21.92  | 24.23  | 36.44  |
| GAIF01016239.1 | 0       | 0      | 0      | 0      | 4.74   | 0      |
| GAIF01016242.1 | 0.06    | 0      | 0      | 0      | 0.21   | 0      |
| GAIF01016244.1 | 0.88    | 0.5    | 1.06   | 0.62   | 1.24   | 0.76   |
| GAIF01016248.1 | 11.77   | 3.12   | 1.09   | 9.04   | 32.75  | 12.91  |
| GAIF01016252.1 | 0       | 0      | 0      | 0      | 0.43   | 0      |
| GAIF01016253.1 | 0       | 0      | 0.06   | 0      | 0      | 0      |
| GAIF01016255.1 | 0.41    | 0.07   | 0.15   | 3.01   | 14.1   | 1.05   |
| GAIF01016256.1 | 0.38    | 0.63   | 0      | 4.23   | 13.61  | 0.21   |
| GAIF01016257.1 | 0.93    | 2.4    | 3.45   | 6.41   | 5.82   | 0.94   |
| GAIF01016260.1 | 0.18    | 0      | 0      | 0      | 0      | 0      |
| GAIF01016262.1 | 0.04    | 0      | 0      | 0      | 0.13   | 0      |
| GAIF01016263.1 | 3.46    | 9.35   | 1.84   | 18.54  | 31.3   | 0.37   |
| GAIF01016264.1 | 0       | 0      | 0      | 2.93   | 14.57  | 0      |
| GAIF01016265.1 | 1380.55 | 1002.8 | 425.62 | 902.04 | 829.03 | 446.5  |
| GAIF01016266.1 | 0.54    | 2.04   | 2.19   | 2.39   | 2.55   | 0.72   |
| GAIF01016268.1 | 0.08    | 0.13   | 0.07   | 0      | 0      | 0.13   |
| GAIF01016270.1 | 0       | 0.3    | 0      | 1.12   | 0.17   | 0      |
| GAIF01016273.1 | 0       | 0      | 0      | 0.05   | 0      | 0.05   |
| GAIF01016275.1 | 0       | 0      | 0      | 0.24   | 1.62   | 0      |
| GAIF01016276.1 | 19.63   | 2.51   | 2.94   | 102.02 | 327.5  | 976.78 |
| GAIF01016277.1 | 10.41   | 1.84   | 0.59   | 98.92  | 493.89 | 10.2   |
| GAIF01016278.1 | 0       | 0      | 0.11   | 0.85   | 0.49   | 0      |
| GAIF01016279.1 | 13.67   | 12.6   | 5.24   | 24.58  | 23.8   | 10.78  |
| GAIF01016280.1 | 0.02    | 0.02   | 0      | 0.21   | 0.4    | 0      |
| GAIF01016281.1 | 0.05    | 0      | 0      | 0      | 0      | 0      |
| GAIF01016282.1 | 0.7     | 0.15   | 0      | 15.6   | 55.92  | 2.78   |
| GAIF01016284.1 | 0.07    | 0      | 0      | 0.93   | 1.79   | 0      |
| GAIF01016285.1 | 0.07    | 0      | 0      | 0.21   | 0.99   | 0      |
| GAIF01016286.1 | 54.24   | 21.75  | 32.64  | 1.81   | 0.44   | 4.15   |
| GAIF01016289.1 | 0.04    | 7.77   | 0      | 0      | 3.84   | 0      |
| GAIF01016291.1 | 2.12    | 3.26   | 0.84   | 30.69  | 64.35  | 0.31   |
| GAIF01016292.1 | 0       | 0.06   | 0      | 0.17   | 2.86   | 0.13   |
| GAIF01016293.1 | 7.43    | 5.29   | 5.49   | 14.65  | 9.25   | 6.98   |

|                |        |        |       |        |        |       |
|----------------|--------|--------|-------|--------|--------|-------|
| GAIF01016295.1 | 7.22   | 6.32   | 3.3   | 1.63   | 1      | 0.07  |
| GAIF01016296.1 | 231.43 | 118.08 | 41.23 | 389.24 | 560.95 | 35.24 |
| GAIF01016297.1 | 62.96  | 79.29  | 59.04 | 67.36  | 55.22  | 27.6  |
| GAIF01016298.1 | 3.81   | 4.55   | 1.76  | 16.98  | 49.99  | 1.36  |
| GAIF01016299.1 | 23.73  | 44.37  | 24.54 | 26.88  | 8.55   | 1.52  |
| GAIF01016300.1 | 0.45   | 0      | 0     | 0.78   | 1.16   | 0.41  |
| GAIF01016301.1 | 0      | 0      | 0     | 0.51   | 1.2    | 0     |
| GAIF01016302.1 | 0      | 0      | 0     | 0      | 0.5    | 0.09  |
| GAIF01016303.1 | 0      | 0      | 0     | 0      | 0.04   | 0     |
| GAIF01016304.1 | 0.22   | 0      | 0     | 0      | 0      | 0     |
| GAIF01016305.1 | 0.94   | 0.34   | 0.4   | 2.72   | 6.4    | 0.23  |
| GAIF01016306.1 | 19.99  | 9.74   | 8.07  | 8.27   | 6.91   | 2.03  |
| GAIF01016307.1 | 0.6    | 0.17   | 0     | 0.65   | 1.75   | 0     |
| GAIF01016308.1 | 0.14   | 0      | 0     | 0.05   | 0.08   | 0     |
| GAIF01016309.1 | 17.18  | 12     | 5.53  | 27.82  | 32.91  | 2.87  |
| GAIF01016311.1 | 64.87  | 35.56  | 24.84 | 11.51  | 7.79   | 1.36  |
| GAIF01016312.1 | 1.19   | 0.92   | 0.15  | 7.9    | 20.25  | 0.08  |
| GAIF01016313.1 | 0.29   | 0.2    | 0.19  | 0.47   | 0      | 0     |
| GAIF01016314.1 | 8.19   | 11.07  | 11.55 | 6.56   | 4.3    | 2.54  |
| GAIF01016315.1 | 0.14   | 0.1    | 0.1   | 0.65   | 3.66   | 0.21  |
| GAIF01016316.1 | 4.37   | 0      | 0     | 4.57   | 13.02  | 15.77 |
| GAIF01016317.1 | 0      | 0      | 0     | 0      | 0      | 0.46  |
| GAIF01016319.1 | 15.66  | 15.24  | 9.34  | 35.6   | 23.91  | 5.44  |
| GAIF01016321.1 | 1.4    | 1.42   | 4.01  | 3.7    | 1.98   | 1.92  |
| GAIF01016323.1 | 16.73  | 12.43  | 12.14 | 1.11   | 5.08   | 2.3   |
| GAIF01016325.1 | 0      | 0      | 0.03  | 0      | 0.15   | 0     |
| GAIF01016326.1 | 0      | 0.94   | 0.32  | 0      | 0      | 0.52  |
| GAIF01016327.1 | 5.52   | 7.87   | 11.43 | 24.97  | 15.34  | 4.41  |
| GAIF01016329.1 | 0      | 0.42   | 1.28  | 0      | 0      | 0     |
| GAIF01016330.1 | 0.17   | 0.47   | 0.1   | 0      | 0.21   | 0.1   |
| GAIF01016332.1 | 5.45   | 2.01   | 0.14  | 3.21   | 3.73   | 1.85  |
| GAIF01016334.1 | 0      | 0.23   | 0     | 0.12   | 0.13   | 0     |
| GAIF01016335.1 | 0.28   | 0      | 0     | 0.92   | 3.44   | 0.23  |
| GAIF01016336.1 | 0      | 0      | 0     | 0      | 0.56   | 0     |
| GAIF01016337.1 | 0.44   | 0      | 1.15  | 0.3    | 0.56   | 0.34  |
| GAIF01016339.1 | 0.32   | 0.26   | 0.18  | 0.19   | 0      | 0     |
| GAIF01016341.1 | 1.57   | 0.17   | 0     | 0.73   | 0.57   | 0     |
| GAIF01016342.1 | 1.13   | 1.73   | 2.09  | 3.72   | 0.9    | 0     |
| GAIF01016343.1 | 0      | 0      | 0     | 0      | 0.72   | 0     |
| GAIF01016344.1 | 19.36  | 22.16  | 17.21 | 7.12   | 4.51   | 0.68  |
| GAIF01016345.1 | 26.6   | 48.86  | 22.27 | 83.49  | 77.56  | 7.09  |
| GAIF01016348.1 | 6.76   | 6.93   | 1.9   | 12.98  | 21.16  | 2.26  |
| GAIF01016350.1 | 13     | 15.22  | 12.55 | 28.6   | 18.25  | 8.97  |
| GAIF01016351.1 | 1.8    | 2.58   | 2.06  | 3.44   | 2.42   | 0.51  |

|                |         |         |         |         |        |         |
|----------------|---------|---------|---------|---------|--------|---------|
| GAIF01016352.1 | 0       | 0.45    | 0       | 0       | 0      | 0       |
| GAIF01016353.1 | 29.23   | 25.95   | 17.3    | 14.14   | 19.08  | 5.91    |
| GAIF01016354.1 | 62.86   | 24.45   | 20.05   | 1.45    | 2.64   | 0       |
| GAIF01016355.1 | 0.11    | 0.08    | 0.08    | 2.38    | 2.08   | 0.08    |
| GAIF01016356.1 | 0       | 0       | 0       | 0.08    | 0      | 0       |
| GAIF01016361.1 | 6.38    | 19.04   | 12.76   | 32.1    | 21.65  | 1.98    |
| GAIF01016363.1 | 0.05    | 0.06    | 0       | 0       | 0      | 0.12    |
| GAIF01016364.1 | 0.12    | 0       | 0       | 0       | 0.43   | 0       |
| GAIF01016365.1 | 1.33    | 0.87    | 0       | 6.67    | 6.79   | 2.49    |
| GAIF01016366.1 | 26.61   | 16.77   | 33.3    | 44.05   | 32     | 58.08   |
| GAIF01016367.1 | 0       | 0.07    | 0       | 0       | 0      | 0.07    |
| GAIF01016368.1 | 11.31   | 18.53   | 11.19   | 43.25   | 41.15  | 6.11    |
| GAIF01016371.1 | 0       | 0       | 0       | 1.29    | 0.42   | 0       |
| GAIF01016372.1 | 0.05    | 0       | 0       | 0       | 0      | 0       |
| GAIF01016374.1 | 0       | 0.28    | 0       | 0       | 1.5    | 0       |
| GAIF01016375.1 | 0.16    | 0.18    | 0       | 0.38    | 0.39   | 0       |
| GAIF01016376.1 | 7.89    | 0.59    | 0.24    | 5.96    | 36.72  | 19.21   |
| GAIF01016377.1 | 34.34   | 66.16   | 45.14   | 3.84    | 2.3    | 3.01    |
| GAIF01016379.1 | 22.29   | 17.53   | 16.82   | 15.25   | 3.89   | 3.4     |
| GAIF01016381.1 | 4.57    | 1.97    | 0.52    | 29.46   | 91.69  | 0.77    |
| GAIF01016382.1 | 18.12   | 14.97   | 6.4     | 24.72   | 34.42  | 1.91    |
| GAIF01016384.1 | 471.24  | 337.32  | 106.24  | 110.47  | 194.96 | 25.6    |
| GAIF01016386.1 | 1.77    | 0.2     | 0.16    | 0.26    | 0.13   | 0.49    |
| GAIF01016388.1 | 834.6   | 839.93  | 1533.63 | 336.58  | 278.12 | 1098.46 |
| GAIF01016389.1 | 3.27    | 1.89    | 4.94    | 6.53    | 4.43   | 6.32    |
| GAIF01016393.1 | 4.03    | 11.32   | 0       | 14.32   | 35.46  | 0       |
| GAIF01016394.1 | 0.05    | 0.06    | 0       | 0.15    | 0.41   | 0       |
| GAIF01016395.1 | 0       | 3.13    | 3.44    | 0       | 0      | 0       |
| GAIF01016400.1 | 0       | 0       | 0       | 0       | 0      | 0.05    |
| GAIF01016401.1 | 0       | 0       | 0       | 0.39    | 0.14   | 0       |
| GAIF01016402.1 | 0.15    | 0       | 0       | 0       | 0.09   | 0       |
| GAIF01016403.1 | 6865.24 | 1091.75 | 2278.83 | 3624.84 | 743.97 | 4952.8  |
| GAIF01016405.1 | 22.5    | 21.51   | 13.7    | 19.39   | 17.28  | 4.17    |
| GAIF01016406.1 | 2.4     | 0       | 0.14    | 6.48    | 40.92  | 124.69  |
| GAIF01016408.1 | 0.14    | 0.18    | 0.05    | 0       | 0      | 0       |
| GAIF01016409.1 | 681.86  | 688.51  | 509.65  | 553.65  | 971.39 | 3961.52 |
| GAIF01016410.1 | 99.21   | 55.26   | 26.92   | 28.43   | 40.92  | 31.05   |
| GAIF01016411.1 | 42.98   | 37.42   | 35.45   | 48.55   | 36.62  | 10.25   |
| GAIF01016412.1 | 0.57    | 1.37    | 0       | 0.39    | 0.47   | 0.32    |
| GAIF01016413.1 | 58.31   | 84.95   | 36.51   | 462.11  | 234.9  | 33.51   |
| GAIF01016415.1 | 10.51   | 7.4     | 4.25    | 23.02   | 19.64  | 3.06    |
| GAIF01016416.1 | 0       | 0       | 0       | 0.29    | 0.09   | 0       |
| GAIF01016417.1 | 2468.57 | 2280.88 | 2996.57 | 1080.02 | 574.4  | 466.03  |
| GAIF01016418.1 | 0.44    | 0       | 0.08    | 1.57    | 9.26   | 0.77    |

|                |        |        |        |        |        |       |
|----------------|--------|--------|--------|--------|--------|-------|
| GAIF01016420.1 | 0      | 0      | 0      | 0.07   | 0.07   | 0     |
| GAIF01016421.1 | 0.12   | 0      | 0      | 0.14   | 0.28   | 0     |
| GAIF01016422.1 | 13.02  | 15.73  | 10.1   | 3.01   | 4.87   | 0.56  |
| GAIF01016423.1 | 0.22   | 0.63   | 0      | 0.75   | 0.52   | 0.47  |
| GAIF01016424.1 | 8.94   | 8.01   | 5.34   | 29.84  | 38.28  | 2.59  |
| GAIF01016425.1 | 13.54  | 14.59  | 2.89   | 15.5   | 23.75  | 3.04  |
| GAIF01016426.1 | 319.86 | 511.26 | 349.48 | 375.93 | 123.32 | 74.74 |
| GAIF01016427.1 | 7.25   | 4.16   | 5.56   | 6.19   | 1.81   | 2.26  |
| GAIF01016428.1 | 0.17   | 0      | 0.29   | 0.1    | 0.42   | 0.1   |
| GAIF01016429.1 | 43.12  | 40.08  | 10.29  | 14.14  | 18.31  | 2.59  |
| GAIF01016430.1 | 0      | 0      | 0      | 0.11   | 0      | 0     |
| GAIF01016431.1 | 25.26  | 21.52  | 4      | 39.53  | 32.95  | 0.7   |
| GAIF01016433.1 | 0      | 0      | 0      | 0.2    | 0.42   | 0.39  |
| GAIF01016434.1 | 2.67   | 2.36   | 0      | 7.24   | 5.36   | 0.25  |
| GAIF01016435.1 | 200.77 | 244.46 | 88.7   | 308.38 | 252.68 | 68.89 |
| GAIF01016436.1 | 10.22  | 9.76   | 8.76   | 13.82  | 5.74   | 5.7   |
| GAIF01016437.1 | 2.28   | 2.96   | 0.55   | 0      | 0      | 0     |
| GAIF01016438.1 | 131.68 | 59.24  | 25.01  | 226.51 | 153.07 | 6.37  |
| GAIF01016440.1 | 0.64   | 0.45   | 0.07   | 0.3    | 1      | 0.07  |
| GAIF01016443.1 | 0.16   | 0.34   | 0.17   | 0.54   | 3.92   | 0.17  |
| GAIF01016444.1 | 3.81   | 5.69   | 4.25   | 9.94   | 16.76  | 0.82  |
| GAIF01016445.1 | 0      | 0.01   | 0      | 0      | 0      | 0     |
| GAIF01016447.1 | 0      | 0.15   | 0      | 0      | 0      | 0     |
| GAIF01016448.1 | 10.88  | 4.25   | 0.59   | 21.59  | 35.7   | 3.49  |
| GAIF01016450.1 | 0      | 0      | 0      | 0.19   | 0      | 0     |
| GAIF01016452.1 | 0.47   | 0      | 0      | 0.37   | 0.69   | 0     |
| GAIF01016454.1 | 0.08   | 0.09   | 0      | 0.88   | 5.75   | 0     |
| GAIF01016455.1 | 0      | 0      | 0      | 0.3    | 0.43   | 0     |
| GAIF01016456.1 | 0      | 4.79   | 1.77   | 0      | 0      | 0.81  |
| GAIF01016459.1 | 1.07   | 0      | 0      | 2.48   | 9.92   | 0.17  |
| GAIF01016460.1 | 0.21   | 0      | 0.12   | 0.12   | 0      | 0     |
| GAIF01016461.1 | 240.82 | 184.12 | 53.44  | 121.53 | 135.58 | 74.35 |
| GAIF01016463.1 | 0.3    | 1.12   | 0.03   | 2.74   | 5.9    | 0.07  |
| GAIF01016464.1 | 1.05   | 1.28   | 0.14   | 3.03   | 4.56   | 0     |
| GAIF01016465.1 | 0.35   | 0.35   | 0.06   | 1.89   | 8.38   | 0.06  |
| GAIF01016468.1 | 0      | 0      | 0      | 0      | 0.42   | 0     |
| GAIF01016469.1 | 1.07   | 0.67   | 0.5    | 0.38   | 0.55   | 0.17  |
| GAIF01016470.1 | 0      | 0.14   | 0.09   | 0.91   | 2.26   | 0     |
| GAIF01016471.1 | 217.59 | 129.94 | 27.23  | 59.72  | 95.18  | 6.87  |
| GAIF01016472.1 | 0.36   | 0.58   | 0      | 0.46   | 0      | 0.23  |
| GAIF01016475.1 | 4.69   | 5.1    | 4.35   | 13.42  | 11.37  | 2.04  |
| GAIF01016476.1 | 6.55   | 7.99   | 6.52   | 24.95  | 14.46  | 25.32 |
| GAIF01016477.1 | 1.31   | 1.54   | 0.64   | 3.5    | 8.71   | 0.37  |
| GAIF01016478.1 | 3.82   | 1.94   | 1.91   | 5.7    | 6.53   | 1.77  |

|                |         |        |        |        |        |         |
|----------------|---------|--------|--------|--------|--------|---------|
| GAIF01016479.1 | 0       | 0      | 0      | 0      | 0.22   | 0       |
| GAIF01016480.1 | 0       | 0.07   | 0.14   | 0.04   | 0.27   | 0       |
| GAIF01016481.1 | 0       | 0      | 0      | 0.48   | 1.21   | 0       |
| GAIF01016483.1 | 0.38    | 0      | 0      | 0.65   | 3.43   | 0.67    |
| GAIF01016486.1 | 0       | 0      | 0      | 0.4    | 0.42   | 0       |
| GAIF01016487.1 | 3.79    | 2.9    | 2.01   | 0      | 0      | 1.7     |
| GAIF01016488.1 | 0.75    | 0.8    | 0.05   | 5.31   | 6.44   | 0.28    |
| GAIF01016489.1 | 0       | 0      | 0      | 0.09   | 0      | 0       |
| GAIF01016490.1 | 0.17    | 0.04   | 0.06   | 0.16   | 0.29   | 0.02    |
| GAIF01016491.1 | 12.96   | 5.78   | 0      | 48.79  | 75.84  | 0.9     |
| GAIF01016493.1 | 0.53    | 0.92   | 0.16   | 2.82   | 3.67   | 0       |
| GAIF01016494.1 | 0       | 0      | 0      | 0.47   | 2.62   | 0       |
| GAIF01016495.1 | 0       | 0      | 0      | 1.08   | 0.22   | 0       |
| GAIF01016496.1 | 14.55   | 8.57   | 4.36   | 25.72  | 16.45  | 2.82    |
| GAIF01016497.1 | 70.51   | 51.83  | 51.01  | 137.25 | 86.64  | 19.81   |
| GAIF01016498.1 | 0.06    | 0.03   | 0.03   | 0.25   | 1.32   | 0.03    |
| GAIF01016499.1 | 336.52  | 326.49 | 656.19 | 139.52 | 86.51  | 253.66  |
| GAIF01016500.1 | 0.03    | 0      | 0.19   | 0      | 0      | 0       |
| GAIF01016501.1 | 0.54    | 0      | 0      | 0.43   | 0.22   | 0.19    |
| GAIF01016502.1 | 0       | 0      | 0      | 0.05   | 0.05   | 0       |
| GAIF01016503.1 | 1156.51 | 318.06 | 753.11 | 901.69 | 909.54 | 8008.38 |
| GAIF01016504.1 | 3.02    | 1.12   | 1.34   | 1.13   | 0.88   | 1.4     |
| GAIF01016505.1 | 0.04    | 0      | 0      | 0      | 0      | 0       |
| GAIF01016507.1 | 5.26    | 4.08   | 3.3    | 9.3    | 21.68  | 11.04   |
| GAIF01016508.1 | 0.93    | 1.35   | 1.19   | 3.43   | 1.87   | 0.51    |
| GAIF01016509.1 | 0       | 0      | 0      | 0.98   | 5.26   | 0.31    |
| GAIF01016510.1 | 18.32   | 36.4   | 35.39  | 53.56  | 37.94  | 6.38    |
| GAIF01016512.1 | 0       | 0      | 0      | 0.02   | 0.05   | 0       |
| GAIF01016513.1 | 32.72   | 32.3   | 20.26  | 9.65   | 3.86   | 2.56    |
| GAIF01016514.1 | 5.8     | 3.26   | 2.36   | 17.76  | 24.08  | 3.48    |
| GAIF01016515.1 | 8.55    | 4.79   | 5.43   | 18.62  | 22.32  | 8.61    |
| GAIF01016516.1 | 2.3     | 6.08   | 1.77   | 6.34   | 12.17  | 0.07    |
| GAIF01016517.1 | 1.66    | 0.26   | 0      | 3.72   | 14     | 1.05    |
| GAIF01016518.1 | 0       | 0.38   | 0      | 0.69   | 1.31   | 0       |
| GAIF01016520.1 | 0.03    | 0      | 0      | 0.25   | 0.63   | 0.03    |
| GAIF01016521.1 | 0       | 0      | 0.22   | 2.75   | 12.12  | 0       |
| GAIF01016522.1 | 0.77    | 1.85   | 1.12   | 2.6    | 1.99   | 0.38    |
| GAIF01016523.1 | 15.21   | 19.57  | 9.43   | 127.34 | 98.78  | 6.88    |
| GAIF01016525.1 | 51.05   | 41.05  | 16.15  | 23.46  | 30.81  | 3.08    |
| GAIF01016526.1 | 15.29   | 28.75  | 16.04  | 59.36  | 39.31  | 5.93    |
| GAIF01016528.1 | 0       | 0.15   | 0      | 0.76   | 0.25   | 0       |
| GAIF01016529.1 | 0       | 1.67   | 0.48   | 0      | 0      | 0.97    |
| GAIF01016530.1 | 14.61   | 28.77  | 38.58  | 3.56   | 2.93   | 4.78    |
| GAIF01016532.1 | 0       | 0      | 0      | 0.15   | 0.79   | 0       |

|                |         |        |        |        |        |        |
|----------------|---------|--------|--------|--------|--------|--------|
| GAIF01016534.1 | 1.02    | 4.23   | 0.62   | 6.05   | 1.05   | 0      |
| GAIF01016535.1 | 151.4   | 203.34 | 70.89  | 49.52  | 107.5  | 12.01  |
| GAIF01016536.1 | 0       | 0      | 0      | 0.51   | 3.72   | 0      |
| GAIF01016537.1 | 0.65    | 0      | 0      | 0.49   | 0.31   | 1      |
| GAIF01016538.1 | 0       | 0      | 0      | 0      | 0.07   | 0      |
| GAIF01016539.1 | 1.73    | 1.64   | 0.58   | 5.15   | 8.14   | 0.5    |
| GAIF01016541.1 | 0.08    | 0      | 0      | 0.09   | 1.9    | 0.74   |
| GAIF01016542.1 | 0       | 0.13   | 0.18   | 0      | 0      | 0      |
| GAIF01016543.1 | 0       | 0.19   | 0      | 0      | 0      | 0      |
| GAIF01016544.1 | 1.09    | 1.32   | 1.13   | 1.01   | 1.27   | 0.45   |
| GAIF01016545.1 | 0.29    | 0.11   | 1.08   | 0.4    | 0.35   | 0.32   |
| GAIF01016547.1 | 0       | 0      | 0      | 0      | 0      | 0.35   |
| GAIF01016549.1 | 13.12   | 30.6   | 9.13   | 67.38  | 172.4  | 133.43 |
| GAIF01016550.1 | 0.02    | 0      | 0      | 0.08   | 0.86   | 0      |
| GAIF01016551.1 | 1.15    | 1.51   | 1.11   | 1.42   | 1.72   | 0.99   |
| GAIF01016553.1 | 16.88   | 15.48  | 16.89  | 26.39  | 12.76  | 3.23   |
| GAIF01016554.1 | 18.83   | 21.85  | 7.82   | 99.16  | 61.84  | 6.1    |
| GAIF01016555.1 | 1.05    | 0      | 0.14   | 3.65   | 20.32  | 4.62   |
| GAIF01016557.1 | 2.01    | 2.3    | 0.23   | 4.54   | 2.16   | 0.47   |
| GAIF01016558.1 | 1.04    | 0.09   | 0      | 3.07   | 10.62  | 0      |
| GAIF01016559.1 | 0.31    | 0.11   | 0.11   | 0.37   | 0.92   | 0      |
| GAIF01016561.1 | 0.52    | 0.08   | 0.08   | 0.39   | 2.84   | 1.75   |
| GAIF01016562.1 | 16.03   | 17.02  | 5.7    | 42.2   | 48.25  | 0.77   |
| GAIF01016563.1 | 0       | 0      | 0.57   | 0      | 0      | 0.32   |
| GAIF01016564.1 | 2.41    | 3.08   | 3.1    | 2.17   | 2.58   | 1.94   |
| GAIF01016567.1 | 0.14    | 0      | 0      | 0      | 0      | 0      |
| GAIF01016568.1 | 0.05    | 0.06   | 0      | 2.07   | 7.1    | 0.12   |
| GAIF01016569.1 | 53.2    | 4.96   | 2.9    | 98.65  | 429.98 | 266.96 |
| GAIF01016570.1 | 0       | 0      | 0.05   | 0.2    | 1.09   | 0      |
| GAIF01016571.1 | 0       | 0      | 0      | 0.22   | 0.55   | 0      |
| GAIF01016572.1 | 11.33   | 14.57  | 22.78  | 48.89  | 53.42  | 14.66  |
| GAIF01016574.1 | 0       | 8.44   | 0      | 0      | 5.85   | 10.97  |
| GAIF01016575.1 | 0.78    | 0.34   | 0      | 0.54   | 0.38   | 0      |
| GAIF01016576.1 | 0       | 0      | 0.04   | 0      | 0      | 0      |
| GAIF01016577.1 | 0       | 0      | 0.17   | 0.12   | 0      | 0      |
| GAIF01016580.1 | 0       | 0      | 0      | 0      | 0.14   | 0      |
| GAIF01016585.1 | 1.79    | 1.49   | 1.96   | 104.03 | 0.33   | 0.45   |
| GAIF01016586.1 | 0       | 0      | 0      | 0.4    | 0.41   | 0.08   |
| GAIF01016587.1 | 9.76    | 11.44  | 18.14  | 14.98  | 7.35   | 11.18  |
| GAIF01016588.1 | 1003.76 | 101.99 | 438.05 | 11.78  | 3.09   | 36.4   |
| GAIF01016589.1 | 16.68   | 27.22  | 27.28  | 32.17  | 37.98  | 29.57  |
| GAIF01016591.1 | 0       | 0      | 0      | 0      | 0.87   | 0      |
| GAIF01016592.1 | 0.3     | 0      | 0      | 0.17   | 0.54   | 0.16   |
| GAIF01016593.1 | 0       | 0.04   | 0      | 0      | 0      | 0      |

|                |       |       |       |       |       |       |
|----------------|-------|-------|-------|-------|-------|-------|
| GAIF01016594.1 | 0     | 0     | 0     | 0     | 0.06  | 0     |
| GAIF01016595.1 | 0     | 0     | 0     | 0.07  | 0     | 0     |
| GAIF01016599.1 | 10.91 | 14.58 | 18.32 | 28.7  | 27.02 | 8.15  |
| GAIF01016600.1 | 0     | 0     | 0     | 0     | 0.2   | 0     |
| GAIF01016601.1 | 6.38  | 4.62  | 3.57  | 9.07  | 12.54 | 10.22 |
| GAIF01016602.1 | 0     | 1.02  | 49.93 | 0     | 10.7  | 0     |
| GAIF01016603.1 | 0     | 0     | 0     | 0.5   | 3.39  | 0.24  |
| GAIF01016604.1 | 0     | 0     | 0     | 0.6   | 2.82  | 0     |
| GAIF01016606.1 | 0     | 0     | 0     | 0.13  | 0     | 0     |
| GAIF01016607.1 | 0.41  | 0.18  | 0.07  | 1.53  | 13.41 | 0.22  |
| GAIF01016609.1 | 2.34  | 0.73  | 0     | 11.51 | 36.46 | 1.47  |
| GAIF01016610.1 | 0     | 0.07  | 0     | 0.11  | 0.8   | 0.03  |
| GAIF01016611.1 | 9.4   | 0     | 0     | 12.6  | 38.65 | 3.21  |
| GAIF01016612.1 | 0.09  | 0.15  | 0     | 0.05  | 0.11  | 0     |
| GAIF01016614.1 | 22.99 | 23.31 | 2.93  | 80.8  | 141.6 | 2.8   |
| GAIF01016615.1 | 0     | 0.55  | 0.69  | 0     | 0     | 0.07  |
| GAIF01016616.1 | 0.19  | 0.13  | 0     | 0.9   | 2.16  | 0.49  |
| GAIF01016617.1 | 0.27  | 0.22  | 0     | 0.78  | 3.42  | 0.3   |
| GAIF01016618.1 | 0.68  | 1.11  | 0.19  | 0.47  | 1.03  | 0     |
| GAIF01016619.1 | 3.08  | 1.61  | 1.62  | 3.47  | 1.52  | 1.06  |
| GAIF01016621.1 | 0     | 0.15  | 0     | 0     | 0     | 0     |
| GAIF01016624.1 | 0     | 0.05  | 0     | 0     | 0     | 0     |
| GAIF01016626.1 | 0     | 1.3   | 0.88  | 0     | 0     | 0.88  |
| GAIF01016627.1 | 11.97 | 24.98 | 22.53 | 6.3   | 7.5   | 2.25  |
| GAIF01016628.1 | 0     | 0     | 0     | 0.9   | 3.74  | 0     |
| GAIF01016629.1 | 1.37  | 0.24  | 0     | 7.32  | 25.39 | 0.3   |
| GAIF01016630.1 | 49.68 | 53.32 | 37.13 | 11.14 | 4.33  | 1.37  |
| GAIF01016631.1 | 0.14  | 0.22  | 0.07  | 1.42  | 3.34  | 1.57  |
| GAIF01016632.1 | 15.95 | 23.54 | 23.05 | 31.17 | 17.62 | 5.83  |
| GAIF01016634.1 | 0     | 0.33  | 0     | 0     | 0.15  | 0     |
| GAIF01016635.1 | 0.11  | 0.18  | 0.12  | 0.13  | 0.26  | 0     |
| GAIF01016636.1 | 0     | 0     | 0     | 1.47  | 6.9   | 0     |
| GAIF01016637.1 | 0     | 0     | 0     | 0     | 1.64  | 0     |
| GAIF01016639.1 | 1.58  | 0     | 0     | 0.58  | 0     | 0     |
| GAIF01016640.1 | 0     | 0     | 0     | 0     | 0.05  | 0     |
| GAIF01016641.1 | 1.08  | 0.78  | 0.2   | 3.55  | 13.08 | 0.2   |
| GAIF01016642.1 | 9.15  | 16.73 | 21.55 | 35.86 | 33.33 | 7.45  |
| GAIF01016643.1 | 0.19  | 0     | 0     | 0     | 0.11  | 0     |
| GAIF01016644.1 | 6.96  | 3.47  | 1.36  | 24.56 | 17.57 | 5.15  |
| GAIF01016646.1 | 6.36  | 20.98 | 25.81 | 26.24 | 26.41 | 18.87 |
| GAIF01016647.1 | 0     | 0     | 0.19  | 0     | 0     | 0     |
| GAIF01016652.1 | 6.99  | 0.25  | 0.49  | 3.53  | 8.4   | 82.95 |
| GAIF01016653.1 | 0.23  | 0     | 0     | 0     | 0.35  | 0.06  |
| GAIF01016654.1 | 0.23  | 0     | 0     | 0.5   | 3.37  | 0     |

|                |        |        |        |        |        |        |
|----------------|--------|--------|--------|--------|--------|--------|
| GAIF01016655.1 | 7.02   | 4.84   | 3.38   | 14.5   | 9.88   | 4.71   |
| GAIF01016656.1 | 0      | 0      | 0      | 0      | 0.31   | 0      |
| GAIF01016658.1 | 2.54   | 0.54   | 0.07   | 6.41   | 25.81  | 1.5    |
| GAIF01016660.1 | 0      | 0      | 0      | 0      | 0      | 0.15   |
| GAIF01016661.1 | 0      | 0      | 0      | 0      | 0.08   | 0      |
| GAIF01016662.1 | 41.62  | 13.15  | 13.86  | 47.84  | 45.49  | 35.78  |
| GAIF01016663.1 | 16.45  | 12.59  | 0.74   | 65.64  | 95.87  | 0.37   |
| GAIF01016664.1 | 0.05   | 0      | 0.11   | 0.06   | 0.93   | 0.11   |
| GAIF01016665.1 | 69.79  | 97.56  | 21.66  | 145.92 | 118.49 | 5.74   |
| GAIF01016670.1 | 2.43   | 1.16   | 4.74   | 2.42   | 0.49   | 0.73   |
| GAIF01016673.1 | 0.69   | 0.41   | 0.28   | 3.36   | 20.36  | 0.28   |
| GAIF01016674.1 | 0.01   | 0      | 0.32   | 0.04   | 0      | 0      |
| GAIF01016675.1 | 60.59  | 42.45  | 28.52  | 61.18  | 101.55 | 153.11 |
| GAIF01016676.1 | 196.68 | 399.19 | 259.11 | 365.15 | 295.39 | 14.45  |
| GAIF01016678.1 | 0.49   | 0.93   | 0.93   | 0.56   | 0.22   | 0.34   |
| GAIF01016680.1 | 0.56   | 0      | 0      | 1.47   | 4.41   | 0      |
| GAIF01016681.1 | 0      | 0.04   | 0      | 0      | 0.44   | 0      |
| GAIF01016682.1 | 0.65   | 0      | 0      | 0.32   | 0.93   | 0      |
| GAIF01016683.1 | 0.43   | 0      | 0      | 1.98   | 12.32  | 0.31   |
| GAIF01016684.1 | 0.46   | 0.12   | 0.18   | 0.57   | 3.22   | 0.9    |
| GAIF01016686.1 | 0      | 0      | 0      | 0.19   | 3.35   | 0.18   |
| GAIF01016687.1 | 0.07   | 0.08   | 0      | 0      | 0      | 0      |
| GAIF01016691.1 | 2.58   | 1.82   | 1.5    | 3      | 1.74   | 1.51   |
| GAIF01016695.1 | 0      | 0      | 0.14   | 0.86   | 1.63   | 0      |
| GAIF01016697.1 | 6.2    | 6.88   | 5.65   | 0.43   | 0.3    | 0.55   |
| GAIF01016698.1 | 64.91  | 104.83 | 129.36 | 94.99  | 47.7   | 43.78  |
| GAIF01016699.1 | 30     | 11.49  | 0.5    | 27.37  | 40.97  | 42.28  |
| GAIF01016700.1 | 2.3    | 2.31   | 2.38   | 1.69   | 2.51   | 4.66   |
| GAIF01016701.1 | 17.66  | 11.66  | 10.81  | 54.23  | 87.4   | 8.57   |
| GAIF01016702.1 | 0      | 0      | 0      | 0.03   | 0.03   | 0      |
| GAIF01016704.1 | 0.43   | 0.15   | 0.04   | 0.08   | 0      | 0.26   |
| GAIF01016705.1 | 9.08   | 12     | 6.49   | 0      | 4.48   | 1.72   |
| GAIF01016706.1 | 0      | 0      | 0      | 0.13   | 0      | 0      |
| GAIF01016710.1 | 0      | 0      | 0      | 0      | 78.17  | 15.95  |
| GAIF01016711.1 | 0      | 0      | 0      | 0.04   | 0.04   | 0      |
| GAIF01016712.1 | 57.31  | 82.53  | 117.98 | 82.77  | 43.62  | 48.26  |
| GAIF01016713.1 | 0.32   | 0.35   | 0      | 1.11   | 3.24   | 0      |
| GAIF01016715.1 | 3.79   | 1.12   | 0.6    | 6.69   | 21.03  | 64.02  |
| GAIF01016716.1 | 5.48   | 2.83   | 5.34   | 8.11   | 5.03   | 19.93  |
| GAIF01016717.1 | 0      | 0.42   | 0.63   | 0      | 0      | 0      |
| GAIF01016719.1 | 1.47   | 0.73   | 1.47   | 0.31   | 0.16   | 0      |
| GAIF01016720.1 | 1.32   | 0.5    | 0.15   | 3      | 0.37   | 0.7    |
| GAIF01016721.1 | 0      | 0      | 0      | 0.53   | 1.93   | 0.13   |
| GAIF01016722.1 | 20.5   | 13.88  | 21.03  | 28.21  | 29.36  | 18.52  |



|                |       |        |       |        |       |       |
|----------------|-------|--------|-------|--------|-------|-------|
| GAIF01016723.1 | 1.06  | 0.16   | 0.11  | 0      | 1.78  | 0.23  |
| GAIF01016724.1 | 0.05  | 0.06   | 0     | 0.25   | 0.92  | 0.06  |
| GAIF01016727.1 | 7.63  | 9.54   | 6.76  | 12.69  | 9.96  | 1.8   |
| GAIF01016728.1 | 2.45  | 0      | 0.6   | 6.76   | 5.11  | 8.1   |
| GAIF01016729.1 | 0.12  | 0.16   | 0.29  | 3.69   | 0.57  | 0.36  |
| GAIF01016730.1 | 23.55 | 23.37  | 20.87 | 9.33   | 9.49  | 5.63  |
| GAIF01016731.1 | 0.03  | 0.03   | 0     | 0      | 0.17  | 0     |
| GAIF01016732.1 | 0     | 0.01   | 0     | 0.05   | 0     | 0     |
| GAIF01016733.1 | 0     | 0      | 0     | 0      | 0.09  | 0     |
| GAIF01016735.1 | 0     | 0      | 0     | 0.13   | 0.07  | 0     |
| GAIF01016738.1 | 10.98 | 5.58   | 6.77  | 28.07  | 32.03 | 18.71 |
| GAIF01016739.1 | 53.45 | 32.92  | 22.31 | 92.74  | 40.68 | 7.43  |
| GAIF01016740.1 | 4.89  | 4.7    | 7.19  | 5.58   | 2.56  | 3.72  |
| GAIF01016741.1 | 11.46 | 14.37  | 20.82 | 40.07  | 49.31 | 15.41 |
| GAIF01016745.1 | 0     | 0      | 0     | 0.95   | 2.94  | 0     |
| GAIF01016746.1 | 3.13  | 1.13   | 0.34  | 16.68  | 42.34 | 0.57  |
| GAIF01016747.1 | 0.69  | 0.09   | 0     | 7.48   | 18.28 | 0.8   |
| GAIF01016748.1 | 78.67 | 42.77  | 43.19 | 45.65  | 78.84 | 72.25 |
| GAIF01016749.1 | 1.55  | 0.57   | 0.41  | 13.2   | 23.41 | 0.36  |
| GAIF01016751.1 | 0     | 0      | 0     | 0      | 0.21  | 0     |
| GAIF01016752.1 | 14.86 | 10.31  | 21.45 | 15.29  | 10.72 | 11.01 |
| GAIF01016754.1 | 63.85 | 83.79  | 116.8 | 74.41  | 50.1  | 54.06 |
| GAIF01016755.1 | 29.06 | 12.67  | 22.27 | 30.39  | 27.49 | 64.72 |
| GAIF01016756.1 | 0.05  | 0      | 0     | 0.19   | 0     | 0.05  |
| GAIF01016757.1 | 7.01  | 2.92   | 0     | 1.23   | 1.38  | 7.62  |
| GAIF01016758.1 | 0.04  | 0      | 0     | 0.09   | 0.09  | 0     |
| GAIF01016759.1 | 5.85  | 7.62   | 4.7   | 5.26   | 3.67  | 0.45  |
| GAIF01016760.1 | 7.18  | 11.82  | 18.81 | 47.99  | 41.42 | 8.22  |
| GAIF01016761.1 | 0.82  | 1.95   | 0.32  | 0.48   | 0.33  | 0.03  |
| GAIF01016762.1 | 0.08  | 0.04   | 0.09  | 0.86   | 3.11  | 0.39  |
| GAIF01016765.1 | 0     | 0      | 0     | 0.52   | 5.59  | 0     |
| GAIF01016766.1 | 0     | 0.03   | 0     | 0      | 0     | 0     |
| GAIF01016768.1 | 10.2  | 9.42   | 10.18 | 22.59  | 14.61 | 3.32  |
| GAIF01016769.1 | 0.77  | 0.34   | 0.11  | 0.36   | 0.69  | 0     |
| GAIF01016770.1 | 10.4  | 26.63  | 38.75 | 135.02 | 75.63 | 39.38 |
| GAIF01016771.1 | 0.08  | 0      | 0     | 0      | 0.41  | 0     |
| GAIF01016772.1 | 37.71 | 7.36   | 5.75  | 9.26   | 4.37  | 1.36  |
| GAIF01016773.1 | 0     | 0      | 0.12  | 0      | 1.13  | 0     |
| GAIF01016775.1 | 0     | 0      | 0     | 0.32   | 0.82  | 0.05  |
| GAIF01016776.1 | 61.89 | 407.33 | 84.79 | 0.82   | 2.35  | 0.29  |
| GAIF01016777.1 | 0.95  | 1.49   | 0.46  | 10.99  | 18.85 | 0.58  |
| GAIF01016778.1 | 1.34  | 6.52   | 5.33  | 1.56   | 1.12  | 0     |
| GAIF01016779.1 | 3.85  | 3.92   | 3.8   | 0      | 1.6   | 0.65  |
| GAIF01016780.1 | 0     | 0.09   | 0     | 0      | 0     | 0     |

|                |         |         |         |         |         |          |
|----------------|---------|---------|---------|---------|---------|----------|
| GAIF01016781.1 | 174.56  | 196.61  | 79.18   | 19.18   | 24.23   | 7.4      |
| GAIF01016783.1 | 0       | 0       | 0       | 0       | 0.04    | 0        |
| GAIF01016785.1 | 4609.67 | 3022.12 | 4903.56 | 2496.96 | 2330.87 | 10021.67 |
| GAIF01016787.1 | 0.13    | 0       | 0.15    | 0.15    | 0       | 0        |
| GAIF01016788.1 | 0.21    | 0.13    | 0.17    | 1.38    | 0.78    | 0.64     |
| GAIF01016791.1 | 1.5     | 2.29    | 0.49    | 0.39    | 0.81    | 0        |
| GAIF01016792.1 | 0       | 0       | 0       | 0       | 0.29    | 0.13     |
| GAIF01016794.1 | 2.72    | 0.12    | 1.01    | 0       | 0.48    | 17.71    |
| GAIF01016798.1 | 7.01    | 6.34    | 2.19    | 12.77   | 25.74   | 12.04    |
| GAIF01016800.1 | 12.22   | 14.37   | 10.79   | 24.5    | 23.9    | 9.68     |
| GAIF01016801.1 | 8.7     | 7.04    | 14.23   | 3.05    | 1.13    | 3.37     |
| GAIF01016802.1 | 2.76    | 2.83    | 0.41    | 2.57    | 1.34    | 1.2      |
| GAIF01016803.1 | 32.44   | 27.95   | 38.87   | 38.1    | 60.91   | 55.11    |
| GAIF01016804.1 | 1.44    | 0.63    | 0.82    | 9.62    | 19.24   | 0.25     |
| GAIF01016805.1 | 3.66    | 3.13    | 3.63    | 6.45    | 7.65    | 1.23     |
| GAIF01016806.1 | 0.11    | 0.13    | 0       | 0.02    | 0       | 0.03     |
| GAIF01016807.1 | 0.1     | 0       | 0       | 0.23    | 0.12    | 0        |
| GAIF01016809.1 | 0       | 0       | 0       | 0       | 0.11    | 0        |
| GAIF01016810.1 | 18.05   | 11.65   | 14.7    | 19.79   | 10.7    | 8.17     |
| GAIF01016811.1 | 0       | 0       | 0       | 0.02    | 0       | 0        |
| GAIF01016812.1 | 0       | 0       | 0       | 0       | 0.1     | 0        |
| GAIF01016813.1 | 1.09    | 2.62    | 2.39    | 4.76    | 2.32    | 0.13     |
| GAIF01016814.1 | 0       | 0       | 0       | 0.07    | 0.67    | 0        |
| GAIF01016815.1 | 0.68    | 1.3     | 0.56    | 3.75    | 5.01    | 0.28     |
| GAIF01016816.1 | 30.51   | 22.9    | 55.82   | 52.94   | 16.99   | 64.45    |
| GAIF01016817.1 | 0.05    | 0       | 0       | 0       | 0.37    | 0.11     |
| GAIF01016819.1 | 0.25    | 0.24    | 0.24    | 0.72    | 0       | 0        |
| GAIF01016820.1 | 4.14    | 2.64    | 3.66    | 4.28    | 3.68    | 2.28     |
| GAIF01016822.1 | 0.69    | 1.15    | 1.09    | 0.42    | 0.56    | 0.04     |
| GAIF01016823.1 | 18.82   | 41.85   | 12.33   | 41.58   | 73.08   | 1.47     |
| GAIF01016824.1 | 27.41   | 29.39   | 34.56   | 56.42   | 32.61   | 34.22    |
| GAIF01016825.1 | 0.63    | 0       | 0       | 0       | 0.38    | 0        |
| GAIF01016826.1 | 0       | 0       | 0       | 0       | 0.34    | 0        |
| GAIF01016827.1 | 36.81   | 17.6    | 13.72   | 93.3    | 118.2   | 34.84    |
| GAIF01016828.1 | 0       | 0.04    | 0       | 0       | 0       | 0        |
| GAIF01016831.1 | 12.9    | 18      | 17.41   | 28.23   | 19.81   | 4.57     |
| GAIF01016832.1 | 0.25    | 0.27    | 0       | 0.86    | 2.81    | 0.81     |
| GAIF01016833.1 | 7.01    | 4.24    | 3.81    | 14.19   | 18.55   | 2.52     |
| GAIF01016834.1 | 21.03   | 14.07   | 15.48   | 15.08   | 11.85   | 8.19     |
| GAIF01016836.1 | 6.54    | 4.39    | 10.25   | 4.43    | 6.64    | 2.02     |
| GAIF01016837.1 | 0.04    | 0       | 0       | 0.46    | 0.69    | 0        |
| GAIF01016838.1 | 7.37    | 6.82    | 10.22   | 3.73    | 4.13    | 6.63     |
| GAIF01016840.1 | 0       | 0       | 0       | 0.59    | 6.07    | 0.49     |
| GAIF01016841.1 | 0       | 0       | 0.13    | 0       | 0       | 0        |

|                |        |        |        |        |        |        |
|----------------|--------|--------|--------|--------|--------|--------|
| GAIF01016842.1 | 97.1   | 42.86  | 56.1   | 65.2   | 34.08  | 31.05  |
| GAIF01016843.1 | 0      | 0      | 0      | 0      | 0      | 0.14   |
| GAIF01016844.1 | 23.75  | 22.16  | 25.12  | 51.01  | 46.36  | 27.55  |
| GAIF01016845.1 | 0.42   | 0      | 0      | 0.39   | 2.1    | 0      |
| GAIF01016846.1 | 0      | 0.05   | 0      | 0.76   | 1.36   | 0      |
| GAIF01016848.1 | 0.45   | 0.1    | 0.2    | 0.31   | 0.54   | 0.99   |
| GAIF01016849.1 | 1.1    | 2.23   | 0.35   | 3.11   | 3.6    | 0.35   |
| GAIF01016851.1 | 0.5    | 0.19   | 0.07   | 0.2    | 0.36   | 0      |
| GAIF01016853.1 | 0      | 0      | 0      | 0      | 0.15   | 0      |
| GAIF01016854.1 | 2.25   | 2.31   | 1.12   | 8.67   | 18.11  | 0.54   |
| GAIF01016855.1 | 0      | 0      | 0      | 0      | 0.19   | 0      |
| GAIF01016857.1 | 0.14   | 0.3    | 0.15   | 0      | 1      | 0      |
| GAIF01016858.1 | 1.09   | 0.26   | 0      | 0.27   | 0.26   | 0.61   |
| GAIF01016862.1 | 0.05   | 0      | 0      | 0      | 0      | 0      |
| GAIF01016863.1 | 0.25   | 0.21   | 0.07   | 0.73   | 1.44   | 3.15   |
| GAIF01016864.1 | 0      | 0      | 0      | 0      | 0      | 0.14   |
| GAIF01016865.1 | 0.61   | 1.37   | 0.59   | 3.55   | 8.54   | 0      |
| GAIF01016868.1 | 0.05   | 0      | 0      | 0.3    | 0.56   | 0      |
| GAIF01016869.1 | 0.86   | 0.33   | 0.04   | 3.27   | 9.7    | 0.38   |
| GAIF01016870.1 | 20.02  | 6.15   | 8.01   | 28.01  | 58.05  | 235.93 |
| GAIF01016875.1 | 0.08   | 0.04   | 0      | 0.28   | 0.96   | 0.04   |
| GAIF01016876.1 | 0.72   | 1.21   | 0.96   | 0.18   | 0.67   | 0.96   |
| GAIF01016877.1 | 14.23  | 4.23   | 0.51   | 10.65  | 5.8    | 2.31   |
| GAIF01016879.1 | 0      | 0      | 0      | 0      | 0.07   | 0      |
| GAIF01016880.1 | 0.28   | 0.12   | 0.06   | 0.17   | 0.64   | 0.67   |
| GAIF01016881.1 | 0      | 0      | 0      | 0      | 0.16   | 0      |
| GAIF01016882.1 | 0.19   | 0.1    | 0.1    | 0.22   | 0.57   | 0      |
| GAIF01016883.1 | 0      | 0.17   | 0      | 0      | 0      | 0      |
| GAIF01016884.1 | 0      | 0      | 0      | 0      | 0      | 1.34   |
| GAIF01016885.1 | 0.17   | 0.11   | 0.11   | 0      | 0.06   | 0      |
| GAIF01016887.1 | 0.03   | 0.01   | 0      | 0      | 0      | 0      |
| GAIF01016888.1 | 5.1    | 5.91   | 2.25   | 1.46   | 0.6    | 0.18   |
| GAIF01016890.1 | 1.17   | 1.84   | 2.14   | 3.47   | 4.69   | 0.29   |
| GAIF01016891.1 | 0.17   | 0.36   | 0.09   | 1.46   | 8.46   | 0.18   |
| GAIF01016892.1 | 0.18   | 0.19   | 0.2    | 0.41   | 0.43   | 0      |
| GAIF01016893.1 | 1.86   | 0.51   | 0.74   | 6.95   | 21.61  | 0.4    |
| GAIF01016896.1 | 0.28   | 0.6    | 0.3    | 1.05   | 2.29   | 0.27   |
| GAIF01016897.1 | 341.46 | 364.11 | 220.42 | 419.13 | 374.24 | 296.38 |
| GAIF01016899.1 | 36.48  | 59.62  | 33.59  | 95.27  | 98.61  | 15.43  |
| GAIF01016900.1 | 0.08   | 0.3    | 0.02   | 0.02   | 0      | 0      |
| GAIF01016902.1 | 0.01   | 0.28   | 0.1    | 0.1    | 0.72   | 0.03   |
| GAIF01016903.1 | 0.44   | 0      | 0      | 2.23   | 4.45   | 0.98   |
| GAIF01016904.1 | 0.65   | 0.64   | 1.63   | 0.77   | 0.35   | 0.91   |
| GAIF01016906.1 | 16     | 17.6   | 21.16  | 5.28   | 13.92  | 8.9    |

|                |        |        |        |        |        |        |
|----------------|--------|--------|--------|--------|--------|--------|
| GAIF01016907.1 | 0      | 0.11   | 0      | 0.61   | 1.39   | 0      |
| GAIF01016909.1 | 0      | 0      | 0      | 0      | 1.02   | 0      |
| GAIF01016910.1 | 0.14   | 0      | 0      | 1.91   | 6.1    | 0      |
| GAIF01016912.1 | 0.5    | 0.57   | 0.76   | 0.81   | 2.01   | 0.36   |
| GAIF01016913.1 | 0.27   | 0.16   | 0      | 0.56   | 2.22   | 0.24   |
| GAIF01016916.1 | 15.8   | 17.49  | 11.41  | 25.44  | 12.15  | 2.2    |
| GAIF01016917.1 | 0      | 0      | 0      | 0      | 0.51   | 0.87   |
| GAIF01016918.1 | 0      | 0.15   | 0      | 0      | 0.17   | 0      |
| GAIF01016919.1 | 1.05   | 0.04   | 0      | 3.52   | 9.66   | 0.83   |
| GAIF01016920.1 | 0.41   | 0      | 0      | 0.96   | 0      | 0      |
| GAIF01016921.1 | 0      | 0      | 1.16   | 1.65   | 0.14   | 0      |
| GAIF01016922.1 | 12.93  | 8.19   | 7.14   | 17.81  | 22.81  | 11.82  |
| GAIF01016923.1 | 9.06   | 17.09  | 0      | 88.56  | 56.33  | 0      |
| GAIF01016924.1 | 0.04   | 0      | 0      | 0      | 0.05   | 0      |
| GAIF01016926.1 | 28.17  | 28.98  | 20.59  | 115.43 | 131.2  | 14.23  |
| GAIF01016927.1 | 0.07   | 0.15   | 0.08   | 0.1    | 0.04   | 0      |
| GAIF01016928.1 | 0.41   | 0      | 0      | 0      | 0      | 0      |
| GAIF01016929.1 | 0      | 0      | 0      | 0      | 0.07   | 0      |
| GAIF01016932.1 | 11.08  | 7.61   | 7.99   | 15.1   | 28.57  | 13.36  |
| GAIF01016933.1 | 0      | 0      | 0      | 0.16   | 0      | 0      |
| GAIF01016934.1 | 0      | 0      | 0      | 0      | 0.33   | 0      |
| GAIF01016935.1 | 0.07   | 0      | 0      | 0.21   | 0.31   | 0      |
| GAIF01016936.1 | 0.23   | 0.37   | 0.22   | 0.86   | 0.54   | 0.11   |
| GAIF01016938.1 | 0.11   | 0      | 0      | 0.13   | 0      | 0      |
| GAIF01016939.1 | 0      | 0.1    | 0      | 0.88   | 1.24   | 0.21   |
| GAIF01016940.1 | 7.88   | 18.84  | 17.21  | 11.16  | 9.79   | 2.1    |
| GAIF01016941.1 | 114.02 | 79.48  | 179.98 | 91.56  | 34.09  | 94.68  |
| GAIF01016942.1 | 0.46   | 0.35   | 0.24   | 0.25   | 0.3    | 0.02   |
| GAIF01016943.1 | 0.06   | 0      | 0      | 0      | 0.08   | 0      |
| GAIF01016944.1 | 0.14   | 0      | 0      | 0      | 0      | 0.31   |
| GAIF01016946.1 | 223.27 | 131.67 | 176.71 | 92.8   | 74.98  | 493.97 |
| GAIF01016947.1 | 1.58   | 0.67   | 0.57   | 2.22   | 3.31   | 0.43   |
| GAIF01016948.1 | 160.72 | 38.22  | 31.93  | 246.2  | 249.31 | 190.49 |
| GAIF01016949.1 | 0.41   | 0.32   | 0      | 0.14   | 0.37   | 0      |
| GAIF01016950.1 | 0.1    | 0      | 0      | 0.12   | 0.12   | 0      |
| GAIF01016951.1 | 52.03  | 30.57  | 36.59  | 80.26  | 108.22 | 137.96 |
| GAIF01016954.1 | 176.86 | 196.37 | 86.19  | 149.47 | 119.35 | 63.51  |
| GAIF01016955.1 | 0.02   | 0      | 0.02   | 0.08   | 0.36   | 0.17   |
| GAIF01016956.1 | 0      | 0.12   | 0      | 0      | 0      | 0      |
| GAIF01016957.1 | 1.86   | 0.88   | 0.33   | 2.57   | 4.18   | 0.22   |
| GAIF01016958.1 | 0      | 0      | 0      | 0.53   | 0      | 0      |
| GAIF01016961.1 | 0      | 2.51   | 2.53   | 0      | 0.08   | 0.15   |
| GAIF01016962.1 | 0.96   | 0.24   | 0.17   | 1.27   | 2.59   | 0      |
| GAIF01016964.1 | 9.51   | 11.6   | 5.01   | 39.6   | 38.31  | 1.44   |

|                |        |        |        |        |        |        |
|----------------|--------|--------|--------|--------|--------|--------|
| GAIF01016967.1 | 0      | 0      | 0      | 0      | 0.09   | 0      |
| GAIF01016968.1 | 0.44   | 0.12   | 0      | 1.03   | 2.14   | 0.12   |
| GAIF01016971.1 | 0.27   | 0      | 0      | 1.51   | 0      | 0      |
| GAIF01016975.1 | 108.85 | 127.79 | 211.83 | 73.39  | 57.27  | 83.47  |
| GAIF01016977.1 | 1.16   | 0.36   | 0.06   | 0.81   | 0.56   | 0      |
| GAIF01016978.1 | 6.56   | 22.41  | 12.97  | 10.91  | 19.58  | 1.18   |
| GAIF01016979.1 | 0.01   | 0      | 0      | 0      | 0.15   | 0      |
| GAIF01016980.1 | 0      | 0      | 0      | 0      | 0.09   | 0      |
| GAIF01016981.1 | 0      | 0      | 0      | 0.37   | 1.27   | 0      |
| GAIF01016982.1 | 0      | 0      | 0      | 0.29   | 3.97   | 0.28   |
| GAIF01016983.1 | 2.2    | 0.9    | 0.8    | 1.53   | 3.37   | 0      |
| GAIF01016984.1 | 0      | 0      | 0      | 0      | 0.09   | 0      |
| GAIF01016985.1 | 0.34   | 0.47   | 0.07   | 0      | 0.01   | 0.01   |
| GAIF01016986.1 | 0.13   | 0.43   | 0      | 0.61   | 0.64   | 0      |
| GAIF01016988.1 | 14.96  | 12.92  | 21.42  | 34.73  | 10.94  | 23.77  |
| GAIF01016989.1 | 0      | 0      | 0.11   | 0      | 0.31   | 0      |
| GAIF01016990.1 | 0.81   | 0      | 0      | 0.46   | 3.11   | 0      |
| GAIF01016991.1 | 4.01   | 5.42   | 3.8    | 0.24   | 5.95   | 1.14   |
| GAIF01016992.1 | 17.09  | 7.75   | 2.66   | 56.47  | 48.65  | 19.65  |
| GAIF01016996.1 | 0.09   | 0      | 0      | 0      | 0      | 0      |
| GAIF01016997.1 | 0      | 0      | 0      | 0      | 0.25   | 0      |
| GAIF01016998.1 | 0.04   | 0.08   | 0.08   | 0.09   | 0.22   | 0      |
| GAIF01017001.1 | 0      | 0.19   | 0      | 1      | 3.22   | 0      |
| GAIF01017002.1 | 0      | 0      | 0      | 0.05   | 0.15   | 0      |
| GAIF01017003.1 | 133.98 | 479.06 | 256.22 | 118.69 | 114.18 | 104.62 |
| GAIF01017004.1 | 0      | 0      | 0      | 0.28   | 0.14   | 0      |
| GAIF01017006.1 | 0      | 0      | 0      | 0.66   | 2.23   | 0      |
| GAIF01017007.1 | 0.26   | 0.06   | 0      | 0.53   | 1.04   | 0.06   |
| GAIF01017008.1 | 2.68   | 6.42   | 3.3    | 13.71  | 15.49  | 2.37   |
| GAIF01017009.1 | 2.61   | 2.69   | 0.67   | 7.75   | 16.88  | 0.22   |
| GAIF01017010.1 | 0.29   | 0.21   | 0      | 4.71   | 11.39  | 0.53   |
| GAIF01017011.1 | 0.76   | 0.18   | 0      | 1.28   | 4.78   | 0.09   |
| GAIF01017012.1 | 0      | 0      | 0      | 0      | 0.34   | 0      |
| GAIF01017013.1 | 0      | 0      | 0      | 0      | 0.51   | 0      |
| GAIF01017015.1 | 0      | 0      | 0.16   | 0      | 0      | 0      |
| GAIF01017016.1 | 12.28  | 18.56  | 14.29  | 18.69  | 13.67  | 5.07   |
| GAIF01017017.1 | 14.23  | 7.84   | 11.05  | 56.83  | 83.2   | 21.58  |
| GAIF01017018.1 | 24.2   | 12.59  | 19.49  | 0.53   | 0.16   | 0.36   |
| GAIF01017019.1 | 0      | 0      | 0      | 0      | 0.07   | 0      |
| GAIF01017020.1 | 1.22   | 0.73   | 0.2    | 3.9    | 25.83  | 0.4    |
| GAIF01017021.1 | 74.46  | 19.73  | 29.4   | 65.79  | 52.33  | 15.52  |
| GAIF01017022.1 | 0      | 0.3    | 0.56   | 0.37   | 0      | 0      |
| GAIF01017023.1 | 2.73   | 2.56   | 0      | 0.41   | 0      | 0      |
| GAIF01017024.1 | 64.33  | 54.23  | 86.77  | 192.75 | 345.49 | 148.03 |

|                |        |       |       |        |        |       |
|----------------|--------|-------|-------|--------|--------|-------|
| GAIF01017026.1 | 0      | 0.55  | 0.13  | 0.02   | 0.07   | 0.14  |
| GAIF01017027.1 | 0.12   | 0     | 0     | 0      | 0.8    | 0.13  |
| GAIF01017028.1 | 0.62   | 0.44  | 0.14  | 0.29   | 3.21   | 0.14  |
| GAIF01017029.1 | 5.21   | 5.59  | 5.31  | 26.96  | 23.37  | 2.63  |
| GAIF01017030.1 | 7.25   | 2.19  | 1.57  | 13.92  | 13.95  | 2.84  |
| GAIF01017031.1 | 0.82   | 1.28  | 0.17  | 6.84   | 6.48   | 0.93  |
| GAIF01017033.1 | 0.54   | 0.8   | 0.97  | 0.63   | 0.71   | 0.87  |
| GAIF01017034.1 | 8.11   | 7.66  | 5.74  | 36.12  | 34.54  | 2.24  |
| GAIF01017035.1 | 0      | 0.31  | 0     | 0      | 0.92   | 0     |
| GAIF01017036.1 | 41.67  | 27    | 29.92 | 64.69  | 62.36  | 75.52 |
| GAIF01017038.1 | 103.58 | 56.55 | 96.77 | 176.28 | 222.31 | 265.8 |
| GAIF01017039.1 | 0      | 0     | 0.04  | 0      | 0      | 0     |
| GAIF01017040.1 | 0      | 0     | 0.04  | 0.05   | 0      | 0     |
| GAIF01017041.1 | 0      | 0     | 0.06  | 0.06   | 0.13   | 0.06  |
| GAIF01017042.1 | 1.77   | 2.6   | 1.02  | 0.5    | 1.93   | 0.42  |
| GAIF01017043.1 | 0.3    | 0.44  | 0.22  | 0      | 0.12   | 0     |
| GAIF01017044.1 | 16.94  | 27.32 | 26.3  | 68.6   | 84.06  | 7.69  |
| GAIF01017046.1 | 3.7    | 1.28  | 2.22  | 10.75  | 10.93  | 1.48  |
| GAIF01017048.1 | 32.95  | 23.71 | 35.61 | 89.86  | 87.93  | 44.49 |
| GAIF01017050.1 | 0.13   | 0     | 0.07  | 0.66   | 1.99   | 0.63  |
| GAIF01017051.1 | 4.83   | 17.48 | 8.8   | 1.85   | 3.23   | 1.31  |
| GAIF01017053.1 | 0      | 0     | 0     | 0      | 0.06   | 0     |
| GAIF01017054.1 | 70.9   | 62.71 | 61.84 | 196.19 | 88.77  | 67.79 |
| GAIF01017055.1 | 12.22  | 22.83 | 14.25 | 9.64   | 11.02  | 1.47  |
| GAIF01017056.1 | 9.77   | 4.78  | 8.42  | 21.78  | 12.97  | 4.88  |
| GAIF01017057.1 | 0.04   | 0.05  | 0     | 0.51   | 3.17   | 0.05  |
| GAIF01017058.1 | 0.07   | 0     | 0     | 0.08   | 0.16   | 0     |
| GAIF01017059.1 | 4.2    | 4.9   | 6.64  | 1.94   | 0.56   | 1.98  |
| GAIF01017060.1 | 0.04   | 0.13  | 0     | 0      | 0      | 0     |
| GAIF01017061.1 | 9.3    | 5.19  | 8.41  | 4.96   | 3.02   | 1.94  |
| GAIF01017062.1 | 0.81   | 0.28  | 0.19  | 0.7    | 16.78  | 0.62  |
| GAIF01017063.1 | 0.08   | 0.08  | 0     | 0.44   | 0.91   | 0.08  |
| GAIF01017064.1 | 0.47   | 0.34  | 0.34  | 0.72   | 0.19   | 0     |
| GAIF01017065.1 | 6.1    | 5.51  | 6.32  | 12.36  | 9.5    | 6.63  |
| GAIF01017068.1 | 0      | 0     | 0     | 0.29   | 1.17   | 0     |
| GAIF01017069.1 | 0.85   | 1.07  | 0.86  | 0.97   | 1.03   | 0.36  |
| GAIF01017070.1 | 0.08   | 0     | 0     | 0.04   | 0.49   | 0     |
| GAIF01017071.1 | 0.08   | 0     | 0     | 0      | 1.41   | 0     |
| GAIF01017072.1 | 0      | 0     | 0     | 0.05   | 0      | 0     |
| GAIF01017074.1 | 52.27  | 26.64 | 18.23 | 5      | 2.28   | 7.73  |
| GAIF01017077.1 | 2.09   | 1.15  | 0.84  | 0.59   | 0.69   | 0.32  |
| GAIF01017078.1 | 0      | 0     | 0     | 0      | 0.34   | 0     |
| GAIF01017079.1 | 12.89  | 27.07 | 45.23 | 7.76   | 7.91   | 18.32 |
| GAIF01017080.1 | 0      | 0     | 0.02  | 0      | 0      | 0     |

|                |       |       |       |       |       |       |
|----------------|-------|-------|-------|-------|-------|-------|
| GAIF01017081.1 | 0.43  | 0.06  | 0     | 0.75  | 2.66  | 0     |
| GAIF01017082.1 | 0     | 0     | 0     | 0.07  | 0.07  | 0     |
| GAIF01017084.1 | 0.32  | 0     | 0     | 1.87  | 4.94  | 0     |
| GAIF01017085.1 | 1.9   | 3.31  | 2.85  | 3.24  | 8.54  | 0.28  |
| GAIF01017087.1 | 0.56  | 0.42  | 0.46  | 0.7   | 0.45  | 0.3   |
| GAIF01017089.1 | 0     | 0     | 0     | 0.04  | 0.12  | 0     |
| GAIF01017090.1 | 3.61  | 1.41  | 1.66  | 13.28 | 20.84 | 3.8   |
| GAIF01017092.1 | 0.14  | 0     | 0     | 0.28  | 0.67  | 0     |
| GAIF01017094.1 | 18.51 | 39.37 | 19.54 | 4.02  | 3.5   | 0.42  |
| GAIF01017095.1 | 0.09  | 0.39  | 0     | 0     | 0     | 0     |
| GAIF01017097.1 | 0     | 0     | 0     | 0     | 0.07  | 0     |
| GAIF01017098.1 | 0.08  | 0     | 0     | 0.1   | 0.5   | 0     |
| GAIF01017099.1 | 0.04  | 0     | 0     | 0     | 0     | 0     |
| GAIF01017102.1 | 0     | 0.32  | 0.16  | 0     | 0     | 0     |
| GAIF01017103.1 | 9.63  | 10.33 | 12.35 | 0.29  | 0.15  | 0     |
| GAIF01017104.1 | 0     | 0     | 0     | 0     | 0.16  | 0     |
| GAIF01017105.1 | 0     | 0     | 0     | 0.13  | 0.51  | 0     |
| GAIF01017107.1 | 1.9   | 1.72  | 2.58  | 3.49  | 2.75  | 2.8   |
| GAIF01017108.1 | 0     | 0     | 0     | 0.11  | 0.23  | 0.11  |
| GAIF01017109.1 | 0.07  | 0.45  | 0.9   | 0     | 0.75  | 0     |
| GAIF01017110.1 | 0.25  | 0     | 0     | 0.28  | 1.18  | 0     |
| GAIF01017111.1 | 0     | 0     | 0     | 0     | 0.7   | 0     |
| GAIF01017112.1 | 5.73  | 6.55  | 6.71  | 34.51 | 15.21 | 5.65  |
| GAIF01017114.1 | 0.12  | 0.25  | 0.26  | 0.27  | 0.28  | 0     |
| GAIF01017115.1 | 22.31 | 13.08 | 14.58 | 36.07 | 23.96 | 10.5  |
| GAIF01017116.1 | 20.82 | 35.1  | 14.36 | 59.34 | 86.3  | 3.91  |
| GAIF01017118.1 | 2.23  | 0.49  | 0.16  | 6.91  | 23.44 | 6.4   |
| GAIF01017119.1 | 7.42  | 5.17  | 8.91  | 15.74 | 6.97  | 23.63 |
| GAIF01017120.1 | 1.93  | 0.3   | 0     | 5.5   | 30.18 | 10.3  |
| GAIF01017122.1 | 0     | 5.46  | 1.58  | 0     | 0     | 0.25  |
| GAIF01017124.1 | 21.02 | 8.85  | 1.25  | 2.54  | 0.37  | 0.1   |
| GAIF01017125.1 | 0     | 0.07  | 0.07  | 0.23  | 1.22  | 0     |
| GAIF01017126.1 | 25    | 41.12 | 66.24 | 37.74 | 27.62 | 7.19  |
| GAIF01017127.1 | 4.65  | 14.9  | 0     | 0     | 0     | 23.45 |
| GAIF01017129.1 | 4.11  | 4.31  | 1.74  | 18.88 | 40.56 | 3.09  |
| GAIF01017131.1 | 0.5   | 0.32  | 0.66  | 0.12  | 0     | 0     |
| GAIF01017132.1 | 9.36  | 11.68 | 12.8  | 21.82 | 15.96 | 9.98  |
| GAIF01017134.1 | 0.07  | 0.15  | 0.08  | 0.25  | 0.08  | 0.23  |
| GAIF01017135.1 | 0     | 0     | 0     | 0.4   | 0.31  | 0     |
| GAIF01017137.1 | 0.2   | 0.37  | 0.15  | 4.81  | 23.84 | 1.12  |
| GAIF01017138.1 | 0.09  | 0.26  | 0     | 0.27  | 0     | 0     |
| GAIF01017141.1 | 0.1   | 0.74  | 0.1   | 0.22  | 2.96  | 0.05  |
| GAIF01017142.1 | 3.15  | 6.11  | 3.16  | 8.67  | 8.32  | 0.83  |
| GAIF01017143.1 | 0.1   | 0.04  | 0     | 0     | 0.18  | 0     |

|                |         |        |        |        |         |         |
|----------------|---------|--------|--------|--------|---------|---------|
| GAIF01017145.1 | 0       | 0      | 0      | 0      | 0.09    | 0       |
| GAIF01017147.1 | 0.66    | 0.18   | 0.54   | 0.48   | 0.59    | 0.27    |
| GAIF01017148.1 | 13.85   | 11.93  | 7.08   | 7.14   | 29.57   | 43.09   |
| GAIF01017149.1 | 4.06    | 3.75   | 0.51   | 10.73  | 14.94   | 0.13    |
| GAIF01017150.1 | 6.12    | 1.14   | 0.88   | 5.6    | 17.78   | 6.99    |
| GAIF01017151.1 | 0       | 0.1    | 0      | 0      | 0.22    | 0       |
| GAIF01017152.1 | 1031.54 | 294.93 | 432.61 | 803.08 | 1259.91 | 3396.16 |
| GAIF01017153.1 | 0.08    | 0.05   | 0      | 0.45   | 1.3     | 0.09    |
| GAIF01017158.1 | 0       | 0      | 0      | 0.49   | 1.89    | 0.75    |
| GAIF01017159.1 | 14.68   | 20.99  | 15.12  | 64.55  | 39.15   | 5.3     |
| GAIF01017160.1 | 0       | 0      | 0      | 0.49   | 0.34    | 0       |
| GAIF01017162.1 | 138.25  | 110.61 | 74.22  | 149.77 | 234.99  | 7.98    |
| GAIF01017163.1 | 10.69   | 5.23   | 6.55   | 14.3   | 17.56   | 29.24   |
| GAIF01017166.1 | 14.03   | 6.92   | 6.42   | 26.7   | 43.36   | 26.03   |
| GAIF01017168.1 | 0       | 0      | 0      | 0.04   | 0.23    | 0       |
| GAIF01017170.1 | 0       | 0.17   | 0      | 0      | 0       | 0       |
| GAIF01017171.1 | 29.52   | 0      | 13.85  | 97.04  | 20.38   | 49.02   |
| GAIF01017172.1 | 53.08   | 54.9   | 25.23  | 99.12  | 139.31  | 78.3    |
| GAIF01017173.1 | 1.19    | 1.25   | 0.26   | 6.4    | 13.35   | 0.39    |
| GAIF01017174.1 | 0.14    | 0.3    | 0.76   | 1.29   | 0.5     | 0.46    |
| GAIF01017178.1 | 0.88    | 0.89   | 0.41   | 0.45   | 1.48    | 0.09    |
| GAIF01017179.1 | 0       | 0      | 0      | 0.07   | 0.55    | 0       |
| GAIF01017180.1 | 0       | 0      | 0      | 0      | 0.14    | 0       |
| GAIF01017181.1 | 9.77    | 9.95   | 11.88  | 9.52   | 5.85    | 7.52    |
| GAIF01017184.1 | 0       | 0      | 0      | 0.12   | 0.12    | 0       |
| GAIF01017185.1 | 0       | 0      | 0.08   | 0      | 0       | 0       |
| GAIF01017186.1 | 0       | 0      | 0      | 0.02   | 0       | 0       |
| GAIF01017187.1 | 0.06    | 0      | 0      | 0      | 0       | 0       |
| GAIF01017188.1 | 0.31    | 0.33   | 0.91   | 1.73   | 5.11    | 0.63    |
| GAIF01017189.1 | 0       | 0      | 0      | 0      | 0       | 0.09    |
| GAIF01017190.1 | 84.04   | 29.45  | 30.74  | 51.75  | 72.16   | 51.39   |
| GAIF01017191.1 | 77.67   | 53.22  | 23.78  | 18.2   | 13.8    | 4.12    |
| GAIF01017192.1 | 0       | 0.14   | 0      | 0      | 0       | 0       |
| GAIF01017193.1 | 0.57    | 0.53   | 0.62   | 1.41   | 0.68    | 0.36    |
| GAIF01017197.1 | 21.28   | 7.72   | 4.6    | 23.79  | 16.45   | 0.03    |
| GAIF01017198.1 | 0.21    | 0.08   | 0.08   | 0      | 0.75    | 0       |
| GAIF01017199.1 | 1.38    | 2.33   | 0.76   | 4      | 1.47    | 0.59    |
| GAIF01017200.1 | 77.9    | 241.97 | 102.03 | 149.88 | 141.6   | 2.88    |
| GAIF01017202.1 | 0       | 0      | 0.09   | 0      | 0.34    | 0       |
| GAIF01017203.1 | 0.17    | 0.07   | 0.06   | 1.29   | 6.21    | 0.15    |
| GAIF01017204.1 | 11.22   | 8.64   | 7.39   | 28.66  | 21.91   | 1.9     |
| GAIF01017206.1 | 0.17    | 0.11   | 0.12   | 0      | 1.81    | 0.17    |
| GAIF01017209.1 | 77.23   | 33.77  | 44.19  | 130.98 | 156.55  | 80.93   |
| GAIF01017211.1 | 60.3    | 50.21  | 62.59  | 23.1   | 19.37   | 84.86   |



|                |         |        |         |         |         |         |
|----------------|---------|--------|---------|---------|---------|---------|
| GAIF01017214.1 | 1.34    | 0.38   | 0.16    | 0.66    | 0.26    | 0.16    |
| GAIF01017215.1 | 30.2    | 44.69  | 31.78   | 27.2    | 14.62   | 7.32    |
| GAIF01017217.1 | 8.66    | 6.73   | 9.05    | 17.3    | 13.21   | 9       |
| GAIF01017219.1 | 1.22    | 5.32   | 1.7     | 0.88    | 4.01    | 0       |
| GAIF01017220.1 | 0.4     | 1.15   | 1.08    | 2.82    | 0.33    | 0.61    |
| GAIF01017221.1 | 0       | 0      | 0       | 0       | 0.08    | 0       |
| GAIF01017223.1 | 0.3     | 0      | 0       | 1.17    | 0.85    | 0.11    |
| GAIF01017224.1 | 0.58    | 0.79   | 0.95    | 0       | 0       | 0.16    |
| GAIF01017225.1 | 0       | 0      | 0       | 0.76    | 1.57    | 0.24    |
| GAIF01017226.1 | 10.55   | 6.99   | 1.86    | 42.5    | 54.83   | 2       |
| GAIF01017228.1 | 0       | 0.08   | 0       | 0       | 0.09    | 0.19    |
| GAIF01017230.1 | 133.92  | 243.83 | 200.88  | 0       | 14.79   | 194.23  |
| GAIF01017231.1 | 0.11    | 0      | 0.12    | 1.82    | 11.07   | 0.25    |
| GAIF01017232.1 | 7.54    | 4.34   | 6.03    | 6.78    | 5.66    | 5.07    |
| GAIF01017233.1 | 0       | 0.72   | 0.62    | 0       | 0       | 0       |
| GAIF01017235.1 | 768.55  | 700.15 | 619.27  | 168.96  | 85.51   | 38.36   |
| GAIF01017236.1 | 0.42    | 0      | 0.25    | 1.55    | 6.24    | 1.34    |
| GAIF01017237.1 | 63.75   | 112.65 | 59.09   | 226.85  | 122.61  | 17.41   |
| GAIF01017238.1 | 0       | 4.04   | 4.19    | 8.25    | 4.17    | 0       |
| GAIF01017239.1 | 36.44   | 49.27  | 43.51   | 73.66   | 27.83   | 18.33   |
| GAIF01017240.1 | 0       | 0      | 0       | 0       | 0.1     | 0       |
| GAIF01017241.1 | 3.53    | 3.21   | 5.22    | 1.09    | 0.26    | 1.35    |
| GAIF01017242.1 | 381.88  | 573.55 | 441.22  | 235.55  | 199.08  | 143.62  |
| GAIF01017244.1 | 0.17    | 0.06   | 0.01    | 1.33    | 3.82    | 0.37    |
| GAIF01017246.1 | 0.06    | 0      | 0       | 0.07    | 0.69    | 0       |
| GAIF01017248.1 | 0.22    | 0.1    | 0.88    | 0       | 0.11    | 0       |
| GAIF01017250.1 | 15.88   | 16.29  | 11.17   | 42.01   | 41.09   | 7.56    |
| GAIF01017251.1 | 0       | 0      | 0       | 0.07    | 0       | 0       |
| GAIF01017254.1 | 62      | 62.94  | 58.9    | 134.34  | 101.3   | 34.04   |
| GAIF01017255.1 | 0       | 0.34   | 0.69    | 0       | 0.13    | 2.31    |
| GAIF01017256.1 | 0.32    | 0      | 0       | 0.07    | 1.3     | 0.14    |
| GAIF01017258.1 | 12.11   | 10.19  | 22.08   | 29.18   | 14.84   | 19.9    |
| GAIF01017259.1 | 0       | 0      | 0       | 0.63    | 2.44    | 0       |
| GAIF01017260.1 | 26.6    | 18.8   | 32.26   | 25.89   | 21.11   | 50.94   |
| GAIF01017262.1 | 8.61    | 6.08   | 7.33    | 21.52   | 14.99   | 11.66   |
| GAIF01017263.1 | 5.36    | 1.73   | 2.92    | 8.11    | 7.37    | 4.78    |
| GAIF01017264.1 | 12.3    | 4.46   | 2.8     | 26.74   | 24.91   | 3.05    |
| GAIF01017267.1 | 0       | 0.11   | 0.34    | 0       | 0       | 0.11    |
| GAIF01017270.1 | 20.75   | 41.79  | 24.28   | 32.53   | 28.66   | 8.85    |
| GAIF01017271.1 | 3211.34 | 3336.5 | 5657.61 | 2104.18 | 1660.96 | 5300.65 |
| GAIF01017272.1 | 0       | 0      | 0       | 0.21    | 0.27    | 0       |
| GAIF01017273.1 | 0       | 0      | 0.09    | 0       | 0       | 0       |
| GAIF01017275.1 | 11.72   | 10.2   | 13.19   | 24.46   | 16.82   | 12.8    |
| GAIF01017276.1 | 3.05    | 1.99   | 1.74    | 10.6    | 4.69    | 0.94    |

|                |        |        |        |        |        |       |
|----------------|--------|--------|--------|--------|--------|-------|
| GAIF01017277.1 | 0.04   | 0      | 0      | 0.04   | 0      | 0     |
| GAIF01017281.1 | 17.44  | 15.3   | 12.88  | 76.48  | 40.98  | 24.76 |
| GAIF01017282.1 | 0      | 0      | 0.14   | 0      | 0      | 0     |
| GAIF01017283.1 | 0.58   | 0.06   | 0      | 1.56   | 4.8    | 0.06  |
| GAIF01017284.1 | 716.79 | 183.45 | 195.75 | 66.76  | 80.4   | 49.15 |
| GAIF01017285.1 | 0.23   | 0.25   | 0      | 0.13   | 0.14   | 0.25  |
| GAIF01017286.1 | 10.08  | 12.25  | 8.3    | 21.18  | 14.88  | 2.23  |
| GAIF01017288.1 | 0.95   | 1.47   | 0.44   | 0.63   | 4.06   | 0     |
| GAIF01017292.1 | 1.67   | 1.32   | 0.4    | 7.56   | 13.39  | 1.92  |
| GAIF01017293.1 | 0.08   | 0      | 0.17   | 0      | 0      | 0.08  |
| GAIF01017295.1 | 41.42  | 55.32  | 53.97  | 123.52 | 51.81  | 29.24 |
| GAIF01017298.1 | 0.22   | 0.08   | 0.2    | 0.74   | 4.75   | 0.08  |
| GAIF01017299.1 | 0.34   | 0.3    | 0.31   | 0.47   | 0.51   | 0     |
| GAIF01017300.1 | 4.02   | 4.79   | 7.44   | 5.31   | 12.87  | 4.47  |
| GAIF01017301.1 | 21.3   | 35.15  | 47.72  | 5.03   | 5.81   | 2.59  |
| GAIF01017302.1 | 0.21   | 0      | 0      | 0.02   | 1.71   | 0     |
| GAIF01017303.1 | 67.79  | 95.47  | 119.18 | 137.42 | 102.27 | 54.44 |
| GAIF01017304.1 | 0.29   | 0.11   | 0      | 1.13   | 4.27   | 0.05  |
| GAIF01017306.1 | 19.56  | 20.98  | 21.67  | 19.33  | 10.54  | 8.45  |
| GAIF01017309.1 | 22.34  | 38.1   | 23.18  | 35.52  | 18.86  | 2.61  |
| GAIF01017310.1 | 0      | 0.11   | 0      | 0.26   | 1.26   | 0     |
| GAIF01017312.1 | 2.41   | 0.62   | 0.38   | 1.46   | 0.69   | 0.13  |
| GAIF01017313.1 | 1.71   | 0.92   | 0.12   | 5.54   | 0.45   | 0.53  |
| GAIF01017315.1 | 0      | 0      | 0      | 0.1    | 0      | 0     |
| GAIF01017316.1 | 20.82  | 23.6   | 24.38  | 60.7   | 26.34  | 13.81 |
| GAIF01017319.1 | 0.98   | 0      | 0.12   | 1.14   | 0.76   | 0     |
| GAIF01017320.1 | 0.05   | 0.03   | 0      | 0      | 0.13   | 0     |
| GAIF01017321.1 | 0.6    | 0.94   | 1.45   | 2.23   | 2.39   | 0.58  |
| GAIF01017322.1 | 4.78   | 2.51   | 5.42   | 1.81   | 2.54   | 2.23  |
| GAIF01017324.1 | 0.43   | 0.05   | 0.03   | 2.44   | 12.37  | 0.23  |
| GAIF01017325.1 | 0.12   | 0.13   | 0      | 0.87   | 1.56   | 0     |
| GAIF01017326.1 | 1.03   | 0.13   | 0      | 6.54   | 18.19  | 0     |
| GAIF01017327.1 | 9.53   | 6.48   | 0.96   | 0.74   | 0.57   | 0.7   |
| GAIF01017328.1 | 4.49   | 13.18  | 3.57   | 2.94   | 2.38   | 1.04  |
| GAIF01017329.1 | 0.2    | 0.04   | 0      | 1.13   | 3.59   | 0.13  |
| GAIF01017332.1 | 32.32  | 27     | 16.98  | 68.2   | 37.29  | 4.36  |
| GAIF01017333.1 | 9.57   | 9.44   | 7.71   | 27.98  | 16.56  | 5.79  |
| GAIF01017335.1 | 2.65   | 0.77   | 0.52   | 3.42   | 10.92  | 21.25 |
| GAIF01017336.1 | 0.09   | 0.24   | 0      | 0.86   | 2.14   | 0.19  |
| GAIF01017337.1 | 2.27   | 0.62   | 1.33   | 0.82   | 0.68   | 0.63  |
| GAIF01017338.1 | 1.22   | 0.53   | 0.71   | 0.45   | 1.06   | 1.05  |
| GAIF01017339.1 | 0      | 0      | 0      | 0.03   | 0      | 0     |
| GAIF01017341.1 | 0.89   | 3.96   | 4.23   | 2.08   | 0      | 0     |
| GAIF01017342.1 | 0.25   | 0      | 0.44   | 0.51   | 0.61   | 0.31  |

|                |        |        |        |       |        |        |
|----------------|--------|--------|--------|-------|--------|--------|
| GAIF01017344.1 | 0      | 0.04   | 0      | 0.41  | 2.75   | 0      |
| GAIF01017347.1 | 0.03   | 0.11   | 0.08   | 0.73  | 3.45   | 0.08   |
| GAIF01017348.1 | 1.68   | 1.83   | 0      | 1.95  | 6.88   | 0      |
| GAIF01017349.1 | 0.5    | 0      | 0      | 0.34  | 2.39   | 0.61   |
| GAIF01017350.1 | 0      | 2.58   | 0      | 2.09  | 6.3    | 0.47   |
| GAIF01017351.1 | 21.17  | 13.62  | 8.18   | 5.67  | 3.84   | 0.69   |
| GAIF01017352.1 | 0.22   | 0.08   | 0.16   | 0     | 0.53   | 0.08   |
| GAIF01017353.1 | 0      | 0      | 0      | 0.07  | 0.39   | 0      |
| GAIF01017354.1 | 93.11  | 82     | 43.83  | 34.14 | 37.71  | 19.33  |
| GAIF01017356.1 | 22.11  | 13.85  | 29.59  | 17.55 | 18.11  | 46.38  |
| GAIF01017359.1 | 14.53  | 10.25  | 10.19  | 24.2  | 16.31  | 14.37  |
| GAIF01017363.1 | 107.86 | 64.22  | 8.78   | 99.11 | 94.13  | 50.56  |
| GAIF01017364.1 | 0      | 0      | 0      | 0     | 0.09   | 0      |
| GAIF01017365.1 | 2.02   | 1.52   | 1.76   | 1.21  | 3.77   | 0.38   |
| GAIF01017366.1 | 0.2    | 0.22   | 0      | 0.23  | 0.97   | 0      |
| GAIF01017367.1 | 0      | 0      | 0.13   | 0     | 1.87   | 0.53   |
| GAIF01017370.1 | 0      | 0      | 0.1    | 0     | 0      | 0      |
| GAIF01017372.1 | 0      | 0      | 0      | 0.21  | 0.19   | 0      |
| GAIF01017373.1 | 29.93  | 55.23  | 46.65  | 78.2  | 54.52  | 10.58  |
| GAIF01017374.1 | 0.02   | 0      | 0      | 0     | 0      | 0      |
| GAIF01017376.1 | 0      | 8.07   | 6.05   | 0     | 0      | 0.7    |
| GAIF01017377.1 | 2.42   | 4.09   | 0.35   | 9.02  | 17.08  | 2.88   |
| GAIF01017378.1 | 0.18   | 0.05   | 0.05   | 1.13  | 5.71   | 0.05   |
| GAIF01017379.1 | 0.89   | 0      | 0      | 0.17  | 1.07   | 0      |
| GAIF01017380.1 | 0      | 0      | 0      | 0.05  | 0      | 0      |
| GAIF01017381.1 | 8.9    | 16.11  | 15.76  | 25.33 | 30.43  | 19.91  |
| GAIF01017384.1 | 0.06   | 0.07   | 0      | 0     | 0.11   | 0      |
| GAIF01017386.1 | 2.32   | 1.08   | 1.82   | 0.58  | 0.2    | 1.28   |
| GAIF01017387.1 | 400.28 | 357.57 | 628.74 | 96.7  | 51.66  | 132.07 |
| GAIF01017388.1 | 0.64   | 0      | 0      | 0.55  | 4.69   | 0.18   |
| GAIF01017389.1 | 25.73  | 29.68  | 62     | 83.71 | 57.01  | 44.38  |
| GAIF01017390.1 | 0      | 0      | 0      | 0.07  | 0      | 0      |
| GAIF01017391.1 | 35.3   | 19.39  | 25.71  | 47.45 | 38.27  | 36.51  |
| GAIF01017392.1 | 0      | 0.23   | 0.28   | 0     | 0      | 0      |
| GAIF01017393.1 | 1.58   | 0.6    | 0      | 7.89  | 30.53  | 0.82   |
| GAIF01017394.1 | 0.16   | 0      | 0.17   | 0     | 0      | 0      |
| GAIF01017395.1 | 0.84   | 0.08   | 0.08   | 3.17  | 6.57   | 0.62   |
| GAIF01017396.1 | 0.25   | 0      | 0      | 0     | 0      | 0      |
| GAIF01017398.1 | 0.26   | 0.1    | 0      | 1.18  | 4.3    | 0.46   |
| GAIF01017399.1 | 0.32   | 0.06   | 0      | 0.25  | 1.16   | 0      |
| GAIF01017401.1 | 417.29 | 851.31 | 195.06 | 40.66 | 121.47 | 66.96  |
| GAIF01017403.1 | 0      | 0      | 0      | 0.15  | 0      | 0      |
| GAIF01017405.1 | 6.53   | 4.15   | 2.44   | 0     | 2.2    | 5.16   |
| GAIF01017406.1 | 0.03   | 0      | 0      | 0.25  | 0.45   | 0.03   |

|                |         |         |         |        |         |         |
|----------------|---------|---------|---------|--------|---------|---------|
| GAIF01017409.1 | 8.94    | 5.2     | 5.46    | 23.1   | 14.23   | 9.96    |
| GAIF01017410.1 | 4.17    | 13.97   | 11.43   | 5.31   | 6.9     | 1.29    |
| GAIF01017411.1 | 0.74    | 4.6     | 2.77    | 4.91   | 4.82    | 0.74    |
| GAIF01017413.1 | 0       | 0       | 0.05    | 0.03   | 0       | 0.02    |
| GAIF01017415.1 | 0       | 0       | 0       | 0      | 0.24    | 0.47    |
| GAIF01017416.1 | 0       | 0       | 0       | 0.07   | 0       | 0       |
| GAIF01017417.1 | 3.56    | 4.32    | 1.94    | 12.25  | 21.92   | 2.77    |
| GAIF01017419.1 | 0.02    | 0       | 0       | 0      | 0       | 0       |
| GAIF01017420.1 | 0.03    | 0.08    | 0       | 0.36   | 1.16    | 0       |
| GAIF01017421.1 | 6.57    | 4.82    | 3.24    | 6.86   | 3.75    | 1.81    |
| GAIF01017422.1 | 94.94   | 81.94   | 59.53   | 30.09  | 13.91   | 5.22    |
| GAIF01017425.1 | 30.19   | 11.96   | 8.47    | 28.64  | 34.16   | 17.95   |
| GAIF01017426.1 | 0.15    | 0.25    | 0.25    | 1.49   | 5.36    | 0.42    |
| GAIF01017427.1 | 0       | 0       | 0       | 0.05   | 0       | 0       |
| GAIF01017429.1 | 8.83    | 21.65   | 22.54   | 12.15  | 11.85   | 7.92    |
| GAIF01017431.1 | 31.87   | 41.71   | 41      | 26.19  | 47.85   | 46.7    |
| GAIF01017432.1 | 56.99   | 59.13   | 50.2    | 130.09 | 124.69  | 94.41   |
| GAIF01017438.1 | 8.11    | 5.77    | 3.16    | 22.07  | 12.94   | 1.62    |
| GAIF01017439.1 | 20.41   | 25.44   | 13.41   | 58.63  | 60.81   | 18.12   |
| GAIF01017440.1 | 28.82   | 25.71   | 31.33   | 42.04  | 66.05   | 16.97   |
| GAIF01017441.1 | 0.03    | 0       | 0.03    | 0.03   | 0       | 0.03    |
| GAIF01017442.1 | 0       | 0.34    | 0.64    | 0      | 0       | 0       |
| GAIF01017443.1 | 0.49    | 0       | 0       | 1.57   | 9.67    | 4.41    |
| GAIF01017444.1 | 58.99   | 42.53   | 77.24   | 137.3  | 58.24   | 118.73  |
| GAIF01017446.1 | 1.15    | 0.36    | 0.18    | 3.44   | 14.06   | 0.18    |
| GAIF01017449.1 | 0.08    | 0.07    | 0       | 0.61   | 0.62    | 0.56    |
| GAIF01017450.1 | 0.05    | 0       | 0       | 0.53   | 2.64    | 0       |
| GAIF01017452.1 | 372.97  | 228.11  | 287.9   | 466.67 | 273.32  | 276.16  |
| GAIF01017453.1 | 12.14   | 28.91   | 11.71   | 9.75   | 16.07   | 0       |
| GAIF01017454.1 | 3544.05 | 2292.82 | 1622.14 | 1953.5 | 1723.79 | 1903.86 |
| GAIF01017455.1 | 15.92   | 14.44   | 6.53    | 14.68  | 29.2    | 19.55   |
| GAIF01017456.1 | 0.89    | 0.33    | 0.38    | 0.39   | 0.86    | 0.38    |
| GAIF01017458.1 | 0.1     | 0       | 0       | 0.91   | 7.33    | 0       |
| GAIF01017459.1 | 1.28    | 0.99    | 0.28    | 5      | 13.79   | 0.35    |
| GAIF01017460.1 | 0.5     | 0.11    | 0.22    | 0.81   | 11.22   | 0.22    |
| GAIF01017462.1 | 32.23   | 42.34   | 105.53  | 19.33  | 13.22   | 98.08   |
| GAIF01017463.1 | 0.55    | 0.12    | 0       | 2.33   | 10.98   | 14.7    |
| GAIF01017464.1 | 0.36    | 0.28    | 0.11    | 0      | 0       | 0       |
| GAIF01017465.1 | 7.95    | 4.06    | 4.84    | 18.68  | 28.69   | 60.07   |
| GAIF01017467.1 | 0.2     | 0.22    | 0       | 0.99   | 5.31    | 0       |
| GAIF01017470.1 | 0.49    | 0       | 0       | 0      | 0       | 0       |
| GAIF01017472.1 | 0.21    | 0       | 0       | 0      | 0       | 0       |
| GAIF01017473.1 | 0.66    | 0.14    | 0       | 0      | 0       | 0       |
| GAIF01017475.1 | 7.73    | 2.28    | 0.71    | 1.92   | 1.55    | 0.71    |

|                |        |        |        |        |        |        |
|----------------|--------|--------|--------|--------|--------|--------|
| GAIF01017477.1 | 0.06   | 0.05   | 0      | 0      | 0.16   | 0      |
| GAIF01017478.1 | 0      | 0      | 0      | 0      | 0.07   | 0      |
| GAIF01017480.1 | 0.61   | 0.11   | 0.48   | 1.23   | 0.16   | 0.29   |
| GAIF01017481.1 | 46.42  | 1.82   | 0      | 38.24  | 104.04 | 71.32  |
| GAIF01017482.1 | 5.91   | 13.33  | 12.27  | 13.21  | 14.28  | 1.16   |
| GAIF01017483.1 | 4.22   | 3.12   | 2.41   | 10.09  | 12.69  | 5.39   |
| GAIF01017485.1 | 4.81   | 2.83   | 1.63   | 23.71  | 23.02  | 2.2    |
| GAIF01017486.1 | 0      | 0      | 0      | 0      | 0.71   | 0      |
| GAIF01017487.1 | 0.25   | 0      | 0.2    | 0      | 0.07   | 0.33   |
| GAIF01017489.1 | 0.06   | 0      | 0      | 0.07   | 0      | 0      |
| GAIF01017490.1 | 0      | 0      | 0      | 0.42   | 0      | 0      |
| GAIF01017491.1 | 0      | 0      | 0.02   | 0      | 0      | 0      |
| GAIF01017492.1 | 0      | 0      | 0      | 10.87  | 12.43  | 0.61   |
| GAIF01017493.1 | 0      | 0      | 0      | 0.13   | 0      | 0      |
| GAIF01017494.1 | 72.79  | 27.86  | 18.6   | 112.08 | 159.6  | 84.93  |
| GAIF01017496.1 | 49.58  | 18.78  | 23.51  | 37.92  | 44.13  | 29.54  |
| GAIF01017498.1 | 0      | 0.19   | 0      | 0.2    | 0.21   | 0      |
| GAIF01017500.1 | 0.1    | 0      | 0      | 0      | 0.13   | 0      |
| GAIF01017501.1 | 0.04   | 0      | 0      | 0.01   | 0.12   | 0      |
| GAIF01017502.1 | 14.1   | 18.58  | 11.21  | 27.4   | 29.86  | 20.25  |
| GAIF01017506.1 | 0.07   | 0.04   | 0      | 0.04   | 0.3    | 0      |
| GAIF01017507.1 | 16.07  | 34.55  | 27.71  | 34.22  | 21.45  | 6.13   |
| GAIF01017508.1 | 0.07   | 0.08   | 0      | 0      | 0.71   | 0      |
| GAIF01017509.1 | 0      | 0.26   | 0.52   | 0      | 0      | 0.04   |
| GAIF01017510.1 | 13.77  | 5.6    | 5.76   | 21.96  | 18.74  | 12.02  |
| GAIF01017513.1 | 64.98  | 88.71  | 49.6   | 138.65 | 126.61 | 13.37  |
| GAIF01017514.1 | 1.86   | 1.83   | 2.63   | 1.76   | 1.38   | 2.24   |
| GAIF01017515.1 | 4.18   | 3.61   | 4.19   | 2.71   | 1.33   | 1.63   |
| GAIF01017516.1 | 0      | 0      | 0      | 0      | 0.25   | 0      |
| GAIF01017517.1 | 1.72   | 0.12   | 0      | 7.63   | 17.89  | 0.36   |
| GAIF01017518.1 | 0      | 0      | 0      | 0      | 0.07   | 0      |
| GAIF01017519.1 | 0.07   | 0.03   | 0      | 0.24   | 0.67   | 0      |
| GAIF01017520.1 | 1.33   | 0.78   | 0.34   | 2.21   | 0.13   | 0.21   |
| GAIF01017521.1 | 1.72   | 1.83   | 3.03   | 0.82   | 1.95   | 0.58   |
| GAIF01017522.1 | 8.15   | 9.08   | 4.67   | 13.04  | 11.69  | 2.15   |
| GAIF01017523.1 | 1.21   | 0.64   | 0.48   | 1.44   | 1.8    | 0.38   |
| GAIF01017524.1 | 0      | 0.14   | 0      | 0.37   | 0.47   | 0.05   |
| GAIF01017525.1 | 296.72 | 104.75 | 113.47 | 168.72 | 241.79 | 207.51 |
| GAIF01017526.1 | 0.68   | 0.83   | 0.28   | 2.81   | 0.91   | 0.34   |
| GAIF01017527.1 | 0.62   | 0      | 0      | 1.12   | 6.88   | 0.15   |
| GAIF01017528.1 | 0      | 0      | 0      | 0      | 0.84   | 0      |
| GAIF01017529.1 | 3.73   | 23.39  | 18.47  | 14.69  | 6.61   | 5.4    |
| GAIF01017530.1 | 0.34   | 0      | 0      | 3.13   | 8.25   | 2.6    |
| GAIF01017531.1 | 81.6   | 52.62  | 62.88  | 89.48  | 79.71  | 214.18 |

|                |         |         |         |        |        |        |
|----------------|---------|---------|---------|--------|--------|--------|
| GAIF01017532.1 | 0       | 0       | 0       | 0      | 4.93   | 0      |
| GAIF01017533.1 | 35.23   | 30.15   | 31.62   | 56.22  | 63.6   | 21.81  |
| GAIF01017534.1 | 1.95    | 0       | 0.17    | 7.43   | 24.58  | 12.36  |
| GAIF01017535.1 | 0       | 0       | 0       | 0.27   | 0      | 0      |
| GAIF01017539.1 | 1209.17 | 1005.18 | 2400.66 | 773.64 | 493.23 | 967.27 |
| GAIF01017540.1 | 3.11    | 1.95    | 0.62    | 5.07   | 7.63   | 3.72   |
| GAIF01017541.1 | 9.88    | 8.29    | 10.33   | 24.32  | 13.32  | 19.55  |
| GAIF01017542.1 | 6.88    | 8.54    | 6.31    | 5.07   | 1.29   | 1.18   |
| GAIF01017543.1 | 0       | 0       | 0       | 0      | 0.37   | 0      |
| GAIF01017544.1 | 0       | 0       | 0       | 0      | 0      | 0.06   |
| GAIF01017545.1 | 25.83   | 25.92   | 21.03   | 39.9   | 31.17  | 13.33  |
| GAIF01017546.1 | 0       | 0       | 0.11    | 0      | 0.12   | 0.11   |
| GAIF01017548.1 | 8.3     | 9.4     | 4.63    | 42.13  | 34.43  | 3.51   |
| GAIF01017549.1 | 1.11    | 0.39    | 0.39    | 2.14   | 2.4    | 0.88   |
| GAIF01017550.1 | 25.61   | 18.5    | 7.1     | 61.87  | 84.57  | 54.89  |
| GAIF01017551.1 | 3.64    | 6.8     | 5.11    | 10.97  | 5.16   | 1.76   |
| GAIF01017552.1 | 0.08    | 0       | 0       | 0.09   | 0.05   | 0      |
| GAIF01017554.1 | 0.13    | 0.05    | 0       | 0      | 0      | 0      |
| GAIF01017555.1 | 0       | 0       | 0       | 0.59   | 0      | 0      |
| GAIF01017556.1 | 0       | 0.69    | 0       | 0.9    | 5.9    | 0      |
| GAIF01017557.1 | 0       | 0       | 0       | 0.11   | 0.09   | 0.16   |
| GAIF01017558.1 | 0       | 0       | 0       | 0      | 0.15   | 0      |
| GAIF01017559.1 | 12.48   | 10.18   | 5.82    | 1.16   | 0.23   | 0.07   |
| GAIF01017560.1 | 0       | 0       | 0       | 0.09   | 0.45   | 0      |
| GAIF01017562.1 | 0       | 0       | 0       | 0      | 0.05   | 0      |
| GAIF01017563.1 | 0       | 0       | 0       | 0.2    | 0      | 0      |
| GAIF01017564.1 | 0       | 0       | 0       | 0.06   | 0      | 0      |
| GAIF01017566.1 | 0       | 0.55    | 0.03    | 0      | 0      | 0      |
| GAIF01017567.1 | 0       | 0       | 0       | 0.08   | 0.25   | 0      |
| GAIF01017568.1 | 0       | 0.04    | 0       | 0      | 0.06   | 0      |
| GAIF01017569.1 | 64.79   | 51.73   | 33.65   | 204.69 | 179.17 | 25.71  |
| GAIF01017570.1 | 13.71   | 31.36   | 16.28   | 28.34  | 23.38  | 3.4    |
| GAIF01017571.1 | 0.25    | 0.27    | 0       | 0      | 1.1    | 0.75   |
| GAIF01017572.1 | 0       | 0       | 0       | 0.38   | 1.97   | 7.05   |
| GAIF01017573.1 | 0       | 0       | 0       | 0      | 0.64   | 0      |
| GAIF01017575.1 | 0.28    | 0       | 0       | 0.97   | 2.85   | 0      |
| GAIF01017576.1 | 3.19    | 4.48    | 4.87    | 6.71   | 3.39   | 0.46   |
| GAIF01017577.1 | 0       | 0       | 0.35    | 0      | 0      | 0      |
| GAIF01017578.1 | 5.74    | 14.68   | 12.14   | 12.48  | 8.82   | 1.75   |
| GAIF01017579.1 | 0       | 0       | 0       | 0      | 0.87   | 0      |
| GAIF01017580.1 | 167.38  | 246.4   | 706.79  | 298.7  | 270.79 | 913.03 |
| GAIF01017581.1 | 1.23    | 0       | 0       | 0      | 5.5    | 0      |
| GAIF01017582.1 | 346.69  | 823.46  | 471.38  | 268.9  | 439.43 | 102.51 |
| GAIF01017583.1 | 0.62    | 0.36    | 0.26    | 1.71   | 1.09   | 0.31   |

|                |        |        |        |        |        |       |
|----------------|--------|--------|--------|--------|--------|-------|
| GAIF01017584.1 | 17.14  | 11.55  | 20.86  | 18.81  | 18.82  | 21.56 |
| GAIF01017586.1 | 0.15   | 0      | 0      | 0      | 2.13   | 0.87  |
| GAIF01017588.1 | 0      | 0      | 0      | 0      | 0.05   | 0     |
| GAIF01017589.1 | 10.38  | 5.99   | 0.57   | 43.21  | 96.23  | 11.18 |
| GAIF01017590.1 | 34.73  | 23.36  | 46.5   | 26.1   | 30.3   | 42.59 |
| GAIF01017591.1 | 0      | 0.06   | 0      | 0.2    | 0.55   | 0     |
| GAIF01017592.1 | 24.73  | 10.17  | 4.79   | 47.97  | 70.93  | 9.13  |
| GAIF01017593.1 | 0.38   | 0.34   | 0.15   | 0      | 0      | 0.04  |
| GAIF01017594.1 | 53.4   | 51.71  | 35.84  | 89.83  | 60.93  | 16.53 |
| GAIF01017595.1 | 0.16   | 0.28   | 0.27   | 0.05   | 0.03   | 0     |
| GAIF01017597.1 | 0.11   | 0      | 0      | 0      | 0      | 0     |
| GAIF01017598.1 | 0.48   | 0.41   | 0.22   | 0.66   | 0.96   | 0.19  |
| GAIF01017600.1 | 0.08   | 0      | 0      | 0.07   | 0.68   | 0.18  |
| GAIF01017601.1 | 0.2    | 15.12  | 60.84  | 0      | 1.96   | 63.82 |
| GAIF01017602.1 | 14.9   | 6.67   | 13.08  | 20.85  | 9.7    | 34.96 |
| GAIF01017603.1 | 0      | 0      | 0      | 0      | 0.14   | 0     |
| GAIF01017604.1 | 8.09   | 14.07  | 13.93  | 19.93  | 11.22  | 4.39  |
| GAIF01017606.1 | 66.91  | 192.4  | 50.9   | 150.13 | 214.04 | 12.89 |
| GAIF01017607.1 | 0      | 0      | 0      | 0.07   | 0.05   | 0     |
| GAIF01017612.1 | 9.57   | 15.25  | 11.04  | 15.93  | 9.02   | 0.98  |
| GAIF01017613.1 | 0.64   | 1.86   | 0.43   | 0.85   | 1.18   | 0     |
| GAIF01017614.1 | 0      | 0      | 0.59   | 0      | 14.5   | 2.14  |
| GAIF01017615.1 | 277.55 | 256.05 | 271.56 | 327.33 | 205.03 | 160.1 |
| GAIF01017616.1 | 0      | 0      | 0      | 0.03   | 0      | 0     |
| GAIF01017617.1 | 0      | 0      | 0      | 0      | 0.69   | 0     |
| GAIF01017618.1 | 0.05   | 0      | 0      | 0      | 0      | 0     |
| GAIF01017619.1 | 24.84  | 42.49  | 18.31  | 45.04  | 48.03  | 2.29  |
| GAIF01017622.1 | 0      | 0      | 0      | 0.04   | 0      | 0     |
| GAIF01017623.1 | 20.82  | 20.66  | 15.9   | 52     | 27.14  | 10.39 |
| GAIF01017624.1 | 33.14  | 62.39  | 62.14  | 60     | 36.94  | 13.83 |
| GAIF01017626.1 | 4.18   | 4.55   | 3.85   | 2.67   | 3.31   | 1.17  |
| GAIF01017627.1 | 0      | 0      | 0      | 0      | 0.06   | 0     |
| GAIF01017629.1 | 0      | 1.43   | 1.17   | 0      | 0.12   | 0     |
| GAIF01017632.1 | 0.12   | 0      | 0.27   | 1.15   | 3.57   | 0     |
| GAIF01017633.1 | 0      | 0      | 0      | 0.54   | 0      | 0.04  |
| GAIF01017635.1 | 0.08   | 0      | 0      | 0.09   | 0.83   | 0     |
| GAIF01017636.1 | 0.1    | 0.03   | 0      | 0.14   | 0      | 0.68  |
| GAIF01017637.1 | 0      | 0      | 0      | 0      | 0.25   | 0     |
| GAIF01017639.1 | 0      | 3.07   | 0.96   | 0      | 0.19   | 0.36  |
| GAIF01017640.1 | 0.37   | 0      | 0      | 2.23   | 10.59  | 0.41  |
| GAIF01017641.1 | 21.43  | 43.87  | 29.45  | 3.09   | 56.28  | 17.54 |
| GAIF01017642.1 | 0      | 0      | 0      | 0.37   | 0      | 0     |
| GAIF01017646.1 | 0      | 0      | 0.18   | 0      | 0.69   | 0.08  |
| GAIF01017647.1 | 0.09   | 0      | 0      | 0      | 0.21   | 0     |

|                |        |        |        |        |        |        |
|----------------|--------|--------|--------|--------|--------|--------|
| GAIF01017648.1 | 0      | 0      | 0      | 0.51   | 0.76   | 1.1    |
| GAIF01017650.1 | 0.08   | 0.93   | 0.17   | 0.18   | 0.28   | 0.43   |
| GAIF01017652.1 | 7.04   | 14.31  | 3.81   | 29.7   | 22     | 0.83   |
| GAIF01017653.1 | 1.45   | 2.23   | 0.78   | 54.98  | 5.13   | 2.59   |
| GAIF01017654.1 | 0      | 0      | 0      | 0      | 0.04   | 0.04   |
| GAIF01017655.1 | 0      | 0      | 0      | 0.61   | 0.84   | 0      |
| GAIF01017657.1 | 0      | 0      | 0      | 0.51   | 1.05   | 0      |
| GAIF01017658.1 | 53.57  | 51.68  | 62.9   | 50.48  | 31.91  | 22.33  |
| GAIF01017659.1 | 0      | 0.06   | 0      | 0      | 0.07   | 0      |
| GAIF01017661.1 | 0      | 0      | 0      | 0.07   | 0.21   | 0.06   |
| GAIF01017663.1 | 16.07  | 19.41  | 27.8   | 43.04  | 21.51  | 14.74  |
| GAIF01017664.1 | 0.04   | 0.09   | 0.05   | 0.45   | 1.08   | 0.47   |
| GAIF01017665.1 | 25.44  | 16.94  | 34.43  | 58.14  | 41.19  | 19.15  |
| GAIF01017666.1 | 0.4    | 0.97   | 0      | 0.26   | 0.76   | 0.15   |
| GAIF01017667.1 | 4.55   | 3.85   | 4.44   | 54.56  | 13.37  | 5.29   |
| GAIF01017668.1 | 0      | 0.06   | 0.19   | 0.47   | 0.77   | 0      |
| GAIF01017669.1 | 8.13   | 1.95   | 1.62   | 2.75   | 1.39   | 0.07   |
| GAIF01017671.1 | 0      | 0.16   | 0      | 1.7    | 13.76  | 0.16   |
| GAIF01017672.1 | 0      | 0      | 0.03   | 0.35   | 1.46   | 0.06   |
| GAIF01017673.1 | 0.42   | 0      | 0.08   | 4.97   | 9.2    | 0.31   |
| GAIF01017675.1 | 0      | 0.23   | 0.17   | 0.18   | 0.22   | 0      |
| GAIF01017676.1 | 2.83   | 0.36   | 0.02   | 6.26   | 28.13  | 1.22   |
| GAIF01017677.1 | 10.78  | 20.52  | 19.87  | 57.07  | 32.12  | 12.45  |
| GAIF01017679.1 | 0      | 0.1    | 0      | 0.07   | 0.16   | 0      |
| GAIF01017680.1 | 0      | 0.34   | 0.34   | 0      | 0      | 0      |
| GAIF01017681.1 | 35.76  | 29.55  | 30.59  | 24.18  | 27.48  | 60.88  |
| GAIF01017682.1 | 0      | 0      | 0      | 0.24   | 0.12   | 0      |
| GAIF01017685.1 | 0.13   | 0.08   | 0.12   | 0.84   | 6.45   | 0      |
| GAIF01017688.1 | 0.15   | 0.33   | 0.52   | 2.64   | 0.18   | 0      |
| GAIF01017689.1 | 0      | 0.14   | 0      | 3.43   | 0.9    | 0      |
| GAIF01017690.1 | 40.71  | 60.39  | 41.64  | 105.08 | 88.04  | 10.11  |
| GAIF01017691.1 | 1.31   | 0.37   | 0.23   | 6.46   | 15.94  | 1.36   |
| GAIF01017692.1 | 0.34   | 0.3    | 0.11   | 0.08   | 0.04   | 0.04   |
| GAIF01017693.1 | 62.68  | 56.16  | 16.94  | 114    | 154.87 | 34.58  |
| GAIF01017694.1 | 0.08   | 0      | 0      | 0.1    | 0.2    | 0.09   |
| GAIF01017695.1 | 0      | 0      | 0      | 0      | 0.07   | 0      |
| GAIF01017696.1 | 4.3    | 3.49   | 0.93   | 8.76   | 7.28   | 0.66   |
| GAIF01017698.1 | 19     | 25.78  | 25.76  | 31.56  | 24.79  | 9.9    |
| GAIF01017699.1 | 0      | 0      | 0      | 0.13   | 0.47   | 0      |
| GAIF01017700.1 | 0      | 0.26   | 0      | 0.09   | 0.19   | 0      |
| GAIF01017701.1 | 1.47   | 4.75   | 0      | 5.26   | 0.61   | 0      |
| GAIF01017703.1 | 338.09 | 248.94 | 342.67 | 935.31 | 743.99 | 417.12 |
| GAIF01017704.1 | 0      | 0      | 0      | 0      | 0.07   | 0      |
| GAIF01017705.1 | 7.27   | 4.11   | 4.47   | 18.72  | 31.04  | 9.81   |



|                |        |        |       |        |        |        |
|----------------|--------|--------|-------|--------|--------|--------|
| GAIF01017707.1 | 0      | 0      | 0     | 0.27   | 0.92   | 0      |
| GAIF01017709.1 | 55.75  | 34.41  | 20.45 | 77.33  | 98.24  | 10.67  |
| GAIF01017711.1 | 0.05   | 0.11   | 0     | 0.06   | 0.42   | 0      |
| GAIF01017713.1 | 0.04   | 0.14   | 0.18  | 0.53   | 1.59   | 0.09   |
| GAIF01017714.1 | 0      | 0      | 0     | 0.31   | 2.01   | 0      |
| GAIF01017718.1 | 134.91 | 150.2  | 69.92 | 185.93 | 153.93 | 35.41  |
| GAIF01017719.1 | 1.85   | 0.6    | 0.15  | 1.83   | 3.8    | 0.15   |
| GAIF01017720.1 | 0      | 0      | 0     | 0      | 0.36   | 0      |
| GAIF01017721.1 | 0.31   | 0.21   | 0.03  | 0.75   | 2.8    | 0.12   |
| GAIF01017722.1 | 0      | 0      | 0     | 0      | 0.31   | 0      |
| GAIF01017723.1 | 1.2    | 0      | 0.49  | 15.62  | 29.37  | 0      |
| GAIF01017724.1 | 41.23  | 68.3   | 50.98 | 91.92  | 77.72  | 10.86  |
| GAIF01017725.1 | 19.35  | 39.15  | 35.12 | 43.75  | 27.44  | 7.56   |
| GAIF01017728.1 | 165.54 | 72.07  | 49.99 | 222.9  | 232.35 | 379.52 |
| GAIF01017730.1 | 0.18   | 0.1    | 0     | 0.42   | 3.81   | 0.4    |
| GAIF01017731.1 | 1.01   | 0.25   | 0     | 1.5    | 1.13   | 1.76   |
| GAIF01017732.1 | 2.62   | 2.85   | 8.64  | 12.17  | 9.46   | 14.45  |
| GAIF01017735.1 | 0.08   | 0.08   | 0     | 0.09   | 0.18   | 0      |
| GAIF01017736.1 | 0.11   | 0      | 0.12  | 0      | 0      | 0.25   |
| GAIF01017737.1 | 0      | 0      | 0     | 0      | 0.16   | 0      |
| GAIF01017738.1 | 1.23   | 1.49   | 0.92  | 21.06  | 21.08  | 8.04   |
| GAIF01017739.1 | 68.58  | 111.23 | 88.06 | 159.47 | 137.27 | 177.74 |
| GAIF01017742.1 | 0.18   | 0.1    | 0     | 0      | 0.22   | 0      |
| GAIF01017743.1 | 1.91   | 1.38   | 1.12  | 0.3    | 0      | 0      |
| GAIF01017744.1 | 0      | 0      | 0     | 0.07   | 0.07   | 0      |
| GAIF01017746.1 | 0.26   | 0      | 0     | 0      | 0.27   | 0.37   |
| GAIF01017747.1 | 47.4   | 51.78  | 25.33 | 197.57 | 253.3  | 26.08  |
| GAIF01017750.1 | 0      | 0.09   | 0     | 0      | 0      | 0      |
| GAIF01017751.1 | 17.57  | 15.64  | 18.11 | 29.53  | 38.84  | 27.38  |
| GAIF01017753.1 | 0.11   | 0      | 0     | 1.64   | 4.22   | 0.28   |
| GAIF01017756.1 | 1.67   | 3.26   | 0.12  | 5.41   | 6.94   | 0      |
| GAIF01017757.1 | 0.1    | 0      | 0     | 0      | 0      | 0.08   |
| GAIF01017758.1 | 3.74   | 0.9    | 0.07  | 0      | 0.26   | 0      |
| GAIF01017759.1 | 3.21   | 3.32   | 6.53  | 311.16 | 113.78 | 568.63 |
| GAIF01017760.1 | 0.06   | 0.13   | 0     | 0.07   | 0.15   | 0      |
| GAIF01017762.1 | 2.56   | 3.6    | 7.04  | 2.93   | 2.91   | 5.88   |
| GAIF01017763.1 | 0.15   | 0      | 0     | 0      | 0.52   | 0      |
| GAIF01017765.1 | 0.34   | 0      | 0     | 0.92   | 2.57   | 5.3    |
| GAIF01017766.1 | 0      | 0.07   | 0     | 0.47   | 0.98   | 0      |
| GAIF01017767.1 | 0      | 0      | 0     | 0      | 0.13   | 0      |
| GAIF01017768.1 | 0.12   | 0      | 0     | 0      | 0      | 0      |
| GAIF01017769.1 | 11.05  | 6.13   | 6.19  | 3.4    | 1.9    | 3.48   |
| GAIF01017770.1 | 0.06   | 0      | 0     | 0      | 0      | 0      |
| GAIF01017771.1 | 0.54   | 0      | 0     | 0.31   | 0.65   | 0      |

|                |         |         |         |        |        |         |
|----------------|---------|---------|---------|--------|--------|---------|
| GAIF01017773.1 | 11.49   | 8.4     | 9.08    | 49.6   | 81.81  | 0       |
| GAIF01017775.1 | 23.35   | 28.43   | 34.03   | 45.49  | 46.35  | 11.51   |
| GAIF01017776.1 | 0       | 0       | 0       | 0.07   | 0      | 0       |
| GAIF01017777.1 | 3.39    | 1.59    | 1.35    | 3.21   | 5.23   | 5.15    |
| GAIF01017779.1 | 3058.94 | 2960.58 | 5391.47 | 987.43 | 589.81 | 1224.66 |
| GAIF01017780.1 | 24.41   | 21.15   | 32.79   | 42.6   | 29.55  | 24.75   |
| GAIF01017781.1 | 0.48    | 0       | 0.74    | 0.78   | 2.75   | 1.8     |
| GAIF01017785.1 | 0.13    | 0.7     | 0       | 0.15   | 0.31   | 0       |
| GAIF01017787.1 | 1.08    | 0.09    | 0.13    | 3.08   | 17.57  | 4.92    |
| GAIF01017788.1 | 0.19    | 0.11    | 0.07    | 0.96   | 4.35   | 0.02    |
| GAIF01017789.1 | 20.06   | 22.06   | 22.03   | 42.04  | 22.33  | 18.57   |
| GAIF01017791.1 | 19.99   | 5.33    | 2.31    | 48.44  | 112.99 | 0.18    |
| GAIF01017792.1 | 0       | 0       | 0       | 0      | 0.13   | 0       |
| GAIF01017794.1 | 0       | 0       | 0       | 0.23   | 0      | 0.18    |
| GAIF01017796.1 | 0       | 0       | 0       | 0      | 0      | 0.17    |
| GAIF01017800.1 | 12.11   | 3.38    | 0.58    | 24.52  | 47.87  | 10.38   |
| GAIF01017801.1 | 32.73   | 30.73   | 14.06   | 110.94 | 157.51 | 7.85    |
| GAIF01017802.1 | 1.77    | 0.33    | 0       | 0.87   | 12.02  | 5.56    |
| GAIF01017803.1 | 0.2     | 0       | 0       | 0.12   | 0.12   | 0       |
| GAIF01017804.1 | 33.18   | 29.69   | 17.78   | 101.27 | 68.02  | 8.06    |
| GAIF01017805.1 | 0       | 0.56    | 0       | 0      | 0      | 0       |
| GAIF01017806.1 | 35.87   | 67.37   | 24.96   | 19.76  | 31.27  | 0       |
| GAIF01017807.1 | 13.2    | 6.87    | 6.14    | 54.79  | 32.79  | 9.01    |
| GAIF01017809.1 | 12.69   | 7.82    | 4.55    | 22.8   | 38.37  | 18.73   |
| GAIF01017812.1 | 0       | 0       | 0       | 1.48   | 5.25   | 0       |
| GAIF01017813.1 | 0       | 0       | 0       | 0.14   | 1.02   | 0.13    |
| GAIF01017814.1 | 0.14    | 0       | 0       | 0      | 0      | 0       |
| GAIF01017815.1 | 1.99    | 0       | 0.2     | 0      | 0.41   | 0       |
| GAIF01017816.1 | 0       | 0       | 0       | 0.35   | 0      | 0       |
| GAIF01017818.1 | 28.41   | 21.34   | 8.7     | 99.67  | 154.02 | 12.64   |
| GAIF01017819.1 | 4.34    | 5.39    | 5.25    | 7.26   | 4.59   | 2.68    |
| GAIF01017820.1 | 39.46   | 31.12   | 35.65   | 56.65  | 41.6   | 22.25   |
| GAIF01017824.1 | 16.56   | 12.01   | 6.06    | 25.63  | 29.85  | 5.27    |
| GAIF01017825.1 | 0       | 0.29    | 0.91    | 0      | 0.04   | 0.05    |
| GAIF01017826.1 | 0       | 0       | 0.03    | 0      | 0      | 0       |
| GAIF01017829.1 | 0       | 0.14    | 0.14    | 0      | 0      | 0       |
| GAIF01017830.1 | 0       | 0.07    | 0       | 0      | 0      | 0       |
| GAIF01017831.1 | 0       | 0       | 0       | 0.25   | 0.51   | 0       |
| GAIF01017832.1 | 0.47    | 0.2     | 0       | 0.11   | 0.18   | 0.1     |
| GAIF01017833.1 | 0.24    | 0.33    | 0.07    | 0.07   | 0      | 0.07    |
| GAIF01017834.1 | 0       | 0.28    | 0.14    | 0.15   | 2.99   | 0       |
| GAIF01017836.1 | 0.06    | 0       | 0       | 0.49   | 2.92   | 0       |
| GAIF01017839.1 | 1.16    | 0.92    | 2.63    | 0.09   | 0.28   | 2.55    |
| GAIF01017840.1 | 0.11    | 0.12    | 0.13    | 0      | 0      | 0       |

|                |        |       |        |        |        |        |
|----------------|--------|-------|--------|--------|--------|--------|
| GAIF01017841.1 | 0.09   | 0.12  | 0.09   | 0.1    | 0.07   | 0      |
| GAIF01017842.1 | 0.22   | 0.08  | 0      | 0      | 0.18   | 0.08   |
| GAIF01017843.1 | 72.27  | 66.25 | 49.7   | 78.52  | 45.87  | 20.02  |
| GAIF01017844.1 | 1.72   | 1.53  | 1.47   | 6.82   | 9.34   | 1.52   |
| GAIF01017845.1 | 31.18  | 26.47 | 33.21  | 24.11  | 19.49  | 9.2    |
| GAIF01017846.1 | 34.3   | 44.12 | 41.28  | 51.92  | 28.88  | 12.98  |
| GAIF01017847.1 | 2.11   | 0.08  | 0.08   | 2.71   | 6.79   | 5.56   |
| GAIF01017848.1 | 34.26  | 1.36  | 7.76   | 74.55  | 12.98  | 0      |
| GAIF01017849.1 | 29.26  | 22.97 | 24.21  | 64.52  | 38.52  | 46.85  |
| GAIF01017851.1 | 32.44  | 32.45 | 30.67  | 4.9    | 21.12  | 21.89  |
| GAIF01017852.1 | 0.37   | 0     | 0      | 0.05   | 0.22   | 0      |
| GAIF01017853.1 | 0.4    | 0.54  | 0.44   | 1.28   | 2.89   | 0.33   |
| GAIF01017854.1 | 38.43  | 37.11 | 41.86  | 318.66 | 120.03 | 475.06 |
| GAIF01017855.1 | 0.89   | 0.6   | 0.49   | 0.84   | 1.89   | 1.61   |
| GAIF01017857.1 | 1.03   | 0.55  | 0.14   | 2.47   | 9.05   | 0.41   |
| GAIF01017858.1 | 0      | 0     | 0      | 0.13   | 0.5    | 0      |
| GAIF01017859.1 | 40.11  | 20.01 | 14.59  | 25.32  | 39.14  | 20.22  |
| GAIF01017860.1 | 37.7   | 45.11 | 29.79  | 40.34  | 62.23  | 24.54  |
| GAIF01017861.1 | 0.63   | 1.61  | 0.7    | 1.96   | 5.58   | 0      |
| GAIF01017862.1 | 0.03   | 0.04  | 0.07   | 0.24   | 3.49   | 0.11   |
| GAIF01017863.1 | 18.55  | 23.89 | 26.78  | 28.07  | 13.62  | 16.26  |
| GAIF01017864.1 | 0.07   | 0.04  | 0      | 0.1    | 0.82   | 0      |
| GAIF01017866.1 | 0.14   | 0.29  | 0      | 1.57   | 8.93   | 0.15   |
| GAIF01017867.1 | 0.79   | 2.49  | 0      | 6.32   | 6.33   | 0      |
| GAIF01017868.1 | 0      | 0     | 0      | 0      | 0.05   | 0      |
| GAIF01017869.1 | 1.25   | 1.6   | 0.78   | 3.92   | 2.16   | 1.26   |
| GAIF01017870.1 | 0.99   | 0     | 0      | 0.29   | 0      | 0      |
| GAIF01017871.1 | 0      | 0     | 0      | 1.61   | 5.88   | 0      |
| GAIF01017873.1 | 0.26   | 0.04  | 0.16   | 0.6    | 1.83   | 0.04   |
| GAIF01017876.1 | 0.61   | 0.09  | 0.05   | 2.02   | 8.62   | 9.86   |
| GAIF01017877.1 | 0      | 0     | 0      | 0.56   | 2.94   | 0      |
| GAIF01017878.1 | 0.07   | 0     | 0      | 0.08   | 0      | 0      |
| GAIF01017879.1 | 8.3    | 5.23  | 6.04   | 13.87  | 20.55  | 23.07  |
| GAIF01017880.1 | 143.35 | 35.63 | 228.77 | 59.95  | 18.6   | 102.89 |
| GAIF01017882.1 | 0      | 4.23  | 5.37   | 0      | 0.25   | 0.72   |
| GAIF01017884.1 | 2.31   | 1.06  | 6.81   | 2.63   | 2.58   | 0      |
| GAIF01017885.1 | 0.35   | 0.11  | 0.05   | 3.52   | 14.2   | 0.6    |
| GAIF01017889.1 | 0.49   | 1.19  | 0      | 12.03  | 27.09  | 12.4   |
| GAIF01017890.1 | 2.74   | 0.45  | 0      | 0.48   | 7.42   | 0.3    |
| GAIF01017891.1 | 0      | 0     | 0      | 0.08   | 0      | 0      |
| GAIF01017892.1 | 0.15   | 0     | 0.7    | 1.39   | 0.2    | 0.59   |
| GAIF01017893.1 | 7.15   | 4.5   | 6.12   | 16.73  | 11.63  | 25.88  |
| GAIF01017894.1 | 66.13  | 75.36 | 41.63  | 64.05  | 56.07  | 11.03  |
| GAIF01017896.1 | 0      | 0     | 0      | 0.86   | 2.31   | 0      |

|                |         |        |         |         |        |         |
|----------------|---------|--------|---------|---------|--------|---------|
| GAIF01017897.1 | 88.4    | 16.92  | 6.83    | 57.83   | 160.81 | 280.12  |
| GAIF01017898.1 | 0.1     | 0      | 0       | 0       | 0.78   | 0       |
| GAIF01017899.1 | 2.39    | 7.93   | 2.18    | 4.57    | 1.66   | 0.65    |
| GAIF01017901.1 | 0       | 0      | 0       | 0.08    | 0      | 0       |
| GAIF01017902.1 | 0.24    | 0.08   | 0       | 1.31    | 6.08   | 0.56    |
| GAIF01017903.1 | 126.34  | 7.79   | 8.42    | 4.99    | 1.65   | 1.99    |
| GAIF01017905.1 | 0       | 0      | 0       | 0.05    | 0      | 0       |
| GAIF01017906.1 | 27.8    | 18.15  | 22.63   | 48      | 36.42  | 42.46   |
| GAIF01017908.1 | 0       | 0      | 0       | 0       | 0.08   | 0       |
| GAIF01017909.1 | 1.14    | 1.64   | 1.48    | 1.19    | 1.23   | 0.45    |
| GAIF01017912.1 | 0       | 0      | 0       | 0.65    | 0      | 0       |
| GAIF01017913.1 | 23.48   | 30.6   | 16.66   | 71.65   | 60.55  | 5.75    |
| GAIF01017914.1 | 1.23    | 0.63   | 0.34    | 2.95    | 6.53   | 0.42    |
| GAIF01017915.1 | 3.54    | 2.6    | 3.64    | 11.31   | 7.91   | 4.81    |
| GAIF01017916.1 | 0.21    | 0      | 0       | 0       | 0.29   | 0.12    |
| GAIF01017917.1 | 18.7    | 10.26  | 7.37    | 24.64   | 14.2   | 17.44   |
| GAIF01017918.1 | 0       | 0      | 0       | 0.09    | 0      | 0       |
| GAIF01017921.1 | 10.62   | 10.28  | 5.44    | 29.99   | 13.64  | 2.68    |
| GAIF01017922.1 | 29.57   | 32.72  | 13.17   | 14.6    | 12.36  | 4.26    |
| GAIF01017923.1 | 1.82    | 3.64   | 0       | 14.01   | 9.86   | 2.46    |
| GAIF01017924.1 | 0       | 0      | 0       | 0       | 0.08   | 0       |
| GAIF01017927.1 | 2.58    | 0      | 0.11    | 20.58   | 72.19  | 0.44    |
| GAIF01017928.1 | 0       | 0      | 0.27    | 0       | 0      | 0       |
| GAIF01017929.1 | 1.78    | 5.8    | 0.9     | 7.3     | 10.2   | 9.19    |
| GAIF01017930.1 | 0.26    | 0.09   | 0       | 0.4     | 6.29   | 0       |
| GAIF01017932.1 | 2.84    | 0.77   | 0.11    | 0.71    | 0.98   | 0       |
| GAIF01017933.1 | 0       | 0      | 0       | 0       | 0.09   | 0       |
| GAIF01017935.1 | 0.9     | 0      | 0       | 0       | 3.59   | 1.08    |
| GAIF01017936.1 | 0       | 0.04   | 0       | 0.12    | 0.28   | 0       |
| GAIF01017937.1 | 0.09    | 0.03   | 0       | 0       | 0.07   | 0       |
| GAIF01017938.1 | 0.26    | 0.14   | 0       | 0.3     | 0.31   | 0       |
| GAIF01017939.1 | 6961.96 | 633.15 | 1809.32 | 3815.55 | 412.93 | 2973.62 |
| GAIF01017940.1 | 0       | 0.1    | 0.2     | 0       | 0      | 0       |
| GAIF01017941.1 | 3.66    | 1.56   | 0       | 41.97   | 116    | 2.32    |
| GAIF01017942.1 | 3.07    | 1.58   | 2.33    | 11.57   | 31.38  | 1.65    |
| GAIF01017943.1 | 0.06    | 0      | 0       | 0.07    | 0      | 0       |
| GAIF01017945.1 | 0.38    | 0.08   | 0.04    | 0.2     | 0.13   | 0       |
| GAIF01017949.1 | 59.74   | 71.04  | 54.72   | 146.13  | 126.72 | 18.22   |
| GAIF01017950.1 | 0.16    | 0      | 0       | 0.69    | 0.38   | 0       |
| GAIF01017951.1 | 0       | 0.06   | 0       | 0.37    | 5.99   | 0.06    |
| GAIF01017953.1 | 0       | 0      | 0       | 0       | 0.07   | 0       |
| GAIF01017954.1 | 0       | 0.15   | 0       | 0       | 0.41   | 0.22    |
| GAIF01017956.1 | 0       | 0.1    | 0       | 0       | 0      | 0       |
| GAIF01017957.1 | 596.23  | 283.29 | 179.58  | 377.44  | 298.65 | 136.43  |

|                |        |        |        |        |        |        |
|----------------|--------|--------|--------|--------|--------|--------|
| GAIF01017958.1 | 1.32   | 1.45   | 1.38   | 3.46   | 0.93   | 0.81   |
| GAIF01017959.1 | 4.55   | 3.04   | 2.27   | 28.73  | 25.76  | 1.19   |
| GAIF01017960.1 | 5.1    | 8.99   | 5.09   | 13.55  | 22.78  | 1.02   |
| GAIF01017961.1 | 1.41   | 0.61   | 0.62   | 4.92   | 3.23   | 2.33   |
| GAIF01017963.1 | 0.87   | 1.14   | 6.7    | 0      | 0      | 0      |
| GAIF01017964.1 | 1.16   | 1.58   | 3.02   | 0.68   | 0.77   | 1.63   |
| GAIF01017965.1 | 3.57   | 2.56   | 2.07   | 3.64   | 12.97  | 2.55   |
| GAIF01017966.1 | 290.05 | 297.42 | 641.6  | 192.6  | 120.45 | 285.71 |
| GAIF01017968.1 | 6.09   | 0.01   | 0      | 7.42   | 19.59  | 2.18   |
| GAIF01017972.1 | 75.16  | 79.68  | 113.03 | 49.38  | 39.29  | 43     |
| GAIF01017973.1 | 16.36  | 10.63  | 25.65  | 31.05  | 25.05  | 71.97  |
| GAIF01017974.1 | 0      | 0      | 0      | 0      | 0.78   | 0.07   |
| GAIF01017976.1 | 0.07   | 0.07   | 0.04   | 0.04   | 0.08   | 0      |
| GAIF01017977.1 | 0      | 0.1    | 0      | 0      | 6.05   | 0.33   |
| GAIF01017978.1 | 0.44   | 0      | 0.1    | 1.32   | 3.79   | 0.29   |
| GAIF01017979.1 | 40.46  | 43.84  | 33.05  | 99.65  | 145.13 | 105.8  |
| GAIF01017982.1 | 103.89 | 55.01  | 77.9   | 264.71 | 114.2  | 199    |
| GAIF01017983.1 | 0      | 0      | 0      | 0.4    | 0      | 0      |
| GAIF01017984.1 | 1.27   | 0.55   | 0.42   | 7.97   | 19.72  | 0.56   |
| GAIF01017985.1 | 0      | 0      | 0      | 0      | 0.29   | 0.02   |
| GAIF01017986.1 | 0.07   | 0.04   | 0      | 0.12   | 0      | 0      |
| GAIF01017988.1 | 0      | 0      | 0      | 0      | 0.15   | 0      |
| GAIF01017991.1 | 0.02   | 0.04   | 0      | 0      | 0      | 0      |
| GAIF01017992.1 | 10.44  | 17.23  | 14.48  | 41.59  | 25.16  | 6.67   |
| GAIF01017994.1 | 0.68   | 0.29   | 0      | 0.31   | 0.32   | 0      |
| GAIF01017995.1 | 10.56  | 1.21   | 6.36   | 2.5    | 6.73   | 184.46 |
| GAIF01017996.1 | 0.67   | 1.02   | 0.15   | 1.5    | 2.63   | 0.15   |
| GAIF01017997.1 | 3.24   | 3.54   | 0.59   | 5.98   | 12.17  | 1.83   |
| GAIF01017998.1 | 55.88  | 90.3   | 77.6   | 89.68  | 73.2   | 20.51  |
| GAIF01017999.1 | 0.62   | 0.35   | 0.09   | 0.23   | 0.35   | 0      |
| GAIF01018001.1 | 55.12  | 126.29 | 52.44  | 80.64  | 63.96  | 8.43   |
| GAIF01018002.1 | 0      | 0      | 0      | 0.04   | 0.71   | 0      |
| GAIF01018003.1 | 177.87 | 130.22 | 264.93 | 134.17 | 59.14  | 138.98 |
| GAIF01018004.1 | 0      | 0      | 0      | 0.37   | 2.21   | 0      |
| GAIF01018005.1 | 400.47 | 342.3  | 372.44 | 289.57 | 169.07 | 109.17 |
| GAIF01018006.1 | 27.7   | 27.73  | 22.42  | 115.04 | 46.49  | 8.65   |
| GAIF01018007.1 | 0.37   | 0.26   | 0.13   | 2.12   | 12.91  | 0.24   |
| GAIF01018008.1 | 54.63  | 15.84  | 54.89  | 75.03  | 35.02  | 14.86  |
| GAIF01018010.1 | 0      | 0.03   | 0      | 0      | 0.04   | 0      |
| GAIF01018011.1 | 0.26   | 0.28   | 0.09   | 1.8    | 2.9    | 0      |
| GAIF01018012.1 | 0.63   | 0      | 0.35   | 2.57   | 6.85   | 0.7    |
| GAIF01018014.1 | 0      | 0      | 0      | 0      | 21.02  | 0      |
| GAIF01018016.1 | 11.83  | 16.29  | 14.09  | 15.16  | 5.73   | 1.78   |
| GAIF01018019.1 | 0      | 0      | 0      | 0.27   | 0.47   | 0      |

|                |        |        |        |        |        |        |
|----------------|--------|--------|--------|--------|--------|--------|
| GAIF01018020.1 | 0.11   | 0.06   | 0.06   | 0.37   | 1.74   | 0.06   |
| GAIF01018021.1 | 0      | 0      | 0      | 0.23   | 0.24   | 0      |
| GAIF01018022.1 | 0      | 0      | 0      | 0      | 0.97   | 0      |
| GAIF01018023.1 | 3.51   | 2.49   | 4.69   | 3.37   | 1.47   | 4.21   |
| GAIF01018024.1 | 0.18   | 0.06   | 0.23   | 0.06   | 0.03   | 0      |
| GAIF01018025.1 | 1.61   | 0.27   | 0.05   | 4.46   | 0.69   | 0.34   |
| GAIF01018027.1 | 0      | 0.16   | 0.11   | 0      | 0.27   | 0      |
| GAIF01018028.1 | 17.36  | 27.62  | 20.62  | 22.58  | 15.33  | 5.54   |
| GAIF01018030.1 | 0.01   | 0      | 0      | 0.21   | 3.38   | 0      |
| GAIF01018031.1 | 0      | 0      | 0.11   | 0.23   | 0.38   | 0.11   |
| GAIF01018033.1 | 24.23  | 18.83  | 23.36  | 28.53  | 17.7   | 22.29  |
| GAIF01018034.1 | 14.44  | 16.14  | 23.19  | 20.81  | 9.82   | 4.28   |
| GAIF01018035.1 | 13.51  | 11.56  | 15.89  | 19.38  | 10.62  | 3.56   |
| GAIF01018036.1 | 82.2   | 53.32  | 78     | 6.01   | 2.09   | 5.67   |
| GAIF01018037.1 | 3.8    | 6.75   | 1.43   | 0      | 0.53   | 0.09   |
| GAIF01018038.1 | 0.33   | 0      | 0      | 0      | 0      | 0      |
| GAIF01018039.1 | 155.93 | 76.86  | 170.44 | 4.03   | 0      | 7.3    |
| GAIF01018040.1 | 0      | 0.12   | 0      | 0      | 0      | 0      |
| GAIF01018041.1 | 0      | 0      | 0      | 0      | 0.2    | 0      |
| GAIF01018042.1 | 0.29   | 0.78   | 0.16   | 3.68   | 4.51   | 0.48   |
| GAIF01018044.1 | 0      | 0      | 0      | 2.77   | 0      | 0      |
| GAIF01018045.1 | 0.04   | 0      | 0      | 0.29   | 1.17   | 0      |
| GAIF01018046.1 | 34.72  | 34.87  | 14.91  | 89.92  | 110.49 | 9.54   |
| GAIF01018047.1 | 0.25   | 0.48   | 0.21   | 1.02   | 0.6    | 0.07   |
| GAIF01018048.1 | 59.62  | 52.51  | 53.39  | 52.24  | 65.94  | 345.51 |
| GAIF01018049.1 | 0.26   | 0.14   | 0.05   | 2.3    | 13.15  | 0.05   |
| GAIF01018050.1 | 0      | 0      | 0      | 0      | 0.51   | 0.03   |
| GAIF01018053.1 | 0      | 0      | 0      | 0      | 0.21   | 0      |
| GAIF01018054.1 | 0.52   | 0.47   | 0.1    | 3.74   | 7.86   | 0.48   |
| GAIF01018055.1 | 0.05   | 0.05   | 0      | 0.05   | 0.88   | 0      |
| GAIF01018058.1 | 0.1    | 0      | 0      | 0      | 0      | 0      |
| GAIF01018059.1 | 0.05   | 0      | 0.47   | 0.25   | 0.7    | 0.23   |
| GAIF01018060.1 | 7.84   | 17.04  | 16.29  | 13.56  | 14.47  | 11.88  |
| GAIF01018063.1 | 0.34   | 0      | 0.22   | 0.08   | 0.4    | 0.6    |
| GAIF01018064.1 | 538.31 | 717.98 | 996.04 | 240.47 | 386.5  | 868.92 |
| GAIF01018066.1 | 0.35   | 0.29   | 0.19   | 3.45   | 7.05   | 0      |
| GAIF01018067.1 | 0.82   | 0      | 0      | 0.8    | 0.99   | 0      |
| GAIF01018069.1 | 0.88   | 0.19   | 0.16   | 0.24   | 1.07   | 0.33   |
| GAIF01018070.1 | 0.5    | 0.41   | 0.69   | 0.58   | 0.15   | 0.14   |
| GAIF01018072.1 | 91.11  | 61.15  | 46.53  | 196.51 | 97.51  | 68.16  |
| GAIF01018075.1 | 0      | 0      | 0.16   | 0.08   | 0.26   | 0      |
| GAIF01018076.1 | 0      | 0.01   | 0      | 0      | 0      | 0      |
| GAIF01018079.1 | 0      | 0      | 0      | 0.17   | 0.81   | 0      |
| GAIF01018081.1 | 0      | 0.05   | 0      | 0      | 0.06   | 0      |

|                |       |       |       |        |        |       |
|----------------|-------|-------|-------|--------|--------|-------|
| GAIF01018083.1 | 0.16  | 0.17  | 0     | 1.86   | 13.14  | 0     |
| GAIF01018084.1 | 0     | 0.07  | 0.07  | 0.15   | 0.65   | 0     |
| GAIF01018088.1 | 0     | 0     | 0.08  | 0      | 0.09   | 0     |
| GAIF01018091.1 | 60.54 | 52.87 | 14.96 | 165.41 | 165.87 | 32.02 |
| GAIF01018093.1 | 2.2   | 1.96  | 0.37  | 11.71  | 35.86  | 1.8   |
| GAIF01018094.1 | 3.37  | 0.03  | 7.81  | 8.73   | 13.63  | 33.92 |
| GAIF01018095.1 | 0.12  | 0.38  | 0.06  | 0.2    | 0.07   | 0     |
| GAIF01018097.1 | 4.12  | 0.56  | 1.53  | 2.75   | 1.36   | 1.82  |
| GAIF01018099.1 | 10.27 | 8.65  | 12.46 | 31.8   | 42.02  | 12.36 |
| GAIF01018100.1 | 0     | 0.53  | 0.15  | 0      | 0      | 0     |
| GAIF01018101.1 | 32.66 | 31.36 | 0     | 57.93  | 51.71  | 24.64 |
| GAIF01018105.1 | 0.02  | 0     | 0     | 0.07   | 0.04   | 0.01  |
| GAIF01018106.1 | 0     | 0     | 0     | 0      | 0      | 0.06  |
| GAIF01018107.1 | 0     | 0.06  | 0.06  | 0      | 0.58   | 0     |
| GAIF01018108.1 | 25.24 | 9.15  | 10.95 | 4.32   | 1.7    | 6.48  |
| GAIF01018109.1 | 16.56 | 28.27 | 20.57 | 4.58   | 4.24   | 2.12  |
| GAIF01018110.1 | 13.87 | 9.52  | 4.42  | 23.58  | 23.5   | 4.34  |
| GAIF01018113.1 | 0     | 0     | 0     | 0      | 0.55   | 0     |
| GAIF01018115.1 | 90.37 | 85.91 | 86.89 | 70.16  | 77.03  | 27.07 |
| GAIF01018116.1 | 0     | 0     | 0     | 0.22   | 0.47   | 0     |
| GAIF01018117.1 | 0     | 0.47  | 0.16  | 0      | 0      | 0     |
| GAIF01018120.1 | 0     | 0     | 0     | 0      | 0.17   | 0     |
| GAIF01018121.1 | 5.96  | 6.84  | 0     | 14.97  | 11.9   | 0     |
| GAIF01018122.1 | 1.59  | 1.09  | 2.2   | 5.24   | 3.62   | 2.86  |
| GAIF01018123.1 | 66.98 | 54.59 | 36.22 | 120.91 | 128.03 | 31.89 |
| GAIF01018126.1 | 0.11  | 0.12  | 0     | 0      | 0.39   | 0     |
| GAIF01018127.1 | 0.34  | 0     | 0     | 0      | 0.56   | 0     |
| GAIF01018128.1 | 0     | 0     | 0     | 0.11   | 0.26   | 0     |
| GAIF01018129.1 | 0     | 0.04  | 0     | 0      | 0      | 0     |
| GAIF01018131.1 | 0     | 0     | 0     | 0      | 0.06   | 0     |
| GAIF01018132.1 | 0     | 0     | 0     | 0      | 0.05   | 0.04  |
| GAIF01018135.1 | 0.06  | 0.06  | 0.03  | 0.56   | 2.96   | 0.03  |
| GAIF01018136.1 | 0.37  | 0.69  | 0.8   | 0.4    | 0.19   | 0     |
| GAIF01018137.1 | 0.03  | 0     | 0     | 0      | 0.1    | 0.02  |
| GAIF01018138.1 | 2.96  | 1.93  | 1.14  | 14.42  | 7.29   | 0.65  |
| GAIF01018140.1 | 0     | 0     | 0     | 0      | 2.22   | 0.9   |
| GAIF01018141.1 | 10.77 | 10.54 | 8.15  | 6.27   | 16.64  | 3.38  |
| GAIF01018142.1 | 0     | 0.03  | 0.08  | 0      | 0      | 0     |
| GAIF01018143.1 | 75.33 | 41.84 | 36.72 | 90.92  | 79     | 20.56 |
| GAIF01018146.1 | 14.76 | 9.22  | 5.5   | 43.47  | 21.84  | 3.38  |
| GAIF01018148.1 | 1.39  | 0.67  | 1.44  | 15.72  | 63.68  | 0.85  |
| GAIF01018150.1 | 0.04  | 0.02  | 0.01  | 0.03   | 0.07   | 0.16  |
| GAIF01018152.1 | 9.61  | 6.28  | 3.91  | 6.45   | 5.71   | 5.83  |
| GAIF01018154.1 | 0.48  | 0.2   | 0.27  | 0.22   | 0.17   | 0.08  |

|                |         |         |         |         |         |         |
|----------------|---------|---------|---------|---------|---------|---------|
| GAIF01018155.1 | 0.44    | 0.12    | 0.37    | 7.55    | 6.86    | 18.53   |
| GAIF01018157.1 | 10.38   | 6.65    | 2.78    | 26.41   | 28.14   | 3.9     |
| GAIF01018158.1 | 0.42    | 0.09    | 0       | 1.08    | 2.13    | 0       |
| GAIF01018159.1 | 0.96    | 1.36    | 1.16    | 4.13    | 3.24    | 0.11    |
| GAIF01018161.1 | 0       | 0.02    | 0       | 0.12    | 0.15    | 0       |
| GAIF01018162.1 | 0       | 0       | 0       | 0       | 0.96    | 0.06    |
| GAIF01018165.1 | 0       | 0.2     | 0       | 0.01    | 0.27    | 0       |
| GAIF01018166.1 | 24.29   | 13.57   | 20.42   | 29.96   | 19.12   | 41.37   |
| GAIF01018168.1 | 0       | 0       | 0       | 1.09    | 0       | 0.61    |
| GAIF01018169.1 | 0       | 0.06    | 0       | 0.24    | 1.19    | 0       |
| GAIF01018171.1 | 8.42    | 5.78    | 6.55    | 34.14   | 53.79   | 4.48    |
| GAIF01018172.1 | 0.13    | 0       | 0       | 0       | 0       | 0.14    |
| GAIF01018173.1 | 1.71    | 1.18    | 0.26    | 15.88   | 38.2    | 1.4     |
| GAIF01018175.1 | 76.11   | 0.58    | 0.69    | 54.49   | 9.32    | 7.25    |
| GAIF01018176.1 | 0       | 0.06    | 0       | 0       | 0.12    | 0       |
| GAIF01018177.1 | 10.84   | 10.81   | 16.52   | 24.54   | 27.47   | 12.44   |
| GAIF01018178.1 | 3569.56 | 2829.36 | 3486.29 | 1456.18 | 966.22  | 2046.25 |
| GAIF01018179.1 | 2.97    | 1.24    | 1.1     | 4.08    | 13.47   | 6.12    |
| GAIF01018180.1 | 146.29  | 21.38   | 28.79   | 505.66  | 335.87  | 609.76  |
| GAIF01018181.1 | 9.14    | 13.42   | 10.02   | 19.8    | 21.78   | 4.83    |
| GAIF01018182.1 | 5.55    | 7.02    | 9.28    | 33.35   | 51.95   | 8.35    |
| GAIF01018184.1 | 1.3     | 0.98    | 0.18    | 1.84    | 4.36    | 0       |
| GAIF01018187.1 | 0       | 0       | 0       | 0.1     | 0.2     | 0       |
| GAIF01018190.1 | 2       | 0.84    | 2.15    | 1.14    | 0.19    | 0.97    |
| GAIF01018192.1 | 0       | 0       | 0       | 3.23    | 3.75    | 12.79   |
| GAIF01018193.1 | 3184.3  | 2282.46 | 4199.29 | 1541.82 | 1364.22 | 6883.82 |
| GAIF01018194.1 | 0.14    | 0       | 0       | 0       | 0       | 0       |
| GAIF01018195.1 | 5.57    | 6.03    | 1.5     | 9.4     | 54.06   | 10.22   |
| GAIF01018198.1 | 0.16    | 0       | 0       | 0.79    | 2.21    | 0.26    |
| GAIF01018199.1 | 0       | 0       | 0.05    | 0.24    | 1.54    | 0.09    |
| GAIF01018200.1 | 1.82    | 3.16    | 1.4     | 11.39   | 24.63   | 0.6     |
| GAIF01018202.1 | 23.69   | 25.17   | 18.97   | 44.85   | 67.34   | 12.29   |
| GAIF01018203.1 | 0       | 0.35    | 0.56    | 0       | 0       | 0.57    |
| GAIF01018204.1 | 2.77    | 0.3     | 0.1     | 2.25    | 3.99    | 3.15    |
| GAIF01018205.1 | 1.65    | 1.22    | 0.94    | 1.61    | 2.23    | 1.82    |
| GAIF01018206.1 | 11.17   | 17.11   | 23.56   | 20.13   | 16.13   | 11.26   |
| GAIF01018207.1 | 26.88   | 8.29    | 0.96    | 107.67  | 515.86  | 84.19   |
| GAIF01018208.1 | 25.65   | 40.3    | 26.99   | 58.47   | 53.42   | 7.65    |
| GAIF01018209.1 | 0.03    | 0       | 0       | 0.35    | 1.79    | 0.24    |
| GAIF01018210.1 | 16.8    | 35.44   | 25.87   | 28.73   | 17.72   | 7.1     |
| GAIF01018211.1 | 0       | 0       | 0       | 1.73    | 0.45    | 0.55    |
| GAIF01018212.1 | 0.11    | 0       | 0       | 0.09    | 0.27    | 0       |
| GAIF01018213.1 | 0       | 0       | 0.26    | 0.05    | 0.58    | 0.12    |
| GAIF01018214.1 | 0.07    | 0       | 0       | 0       | 0       | 0       |



|                |        |        |        |        |        |        |
|----------------|--------|--------|--------|--------|--------|--------|
| GAIF01018215.1 | 22.58  | 30.33  | 22.42  | 8.01   | 4.58   | 2.14   |
| GAIF01018216.1 | 13.06  | 13.7   | 7.82   | 36.83  | 50.69  | 11.47  |
| GAIF01018218.1 | 22.91  | 36.22  | 19.07  | 27.03  | 26.17  | 6.1    |
| GAIF01018219.1 | 0.14   | 0      | 0      | 0.16   | 0.33   | 0      |
| GAIF01018220.1 | 52.05  | 38.88  | 99.69  | 147.91 | 68.1   | 157.44 |
| GAIF01018222.1 | 0.62   | 1.57   | 0.37   | 0.66   | 0.6    | 0.18   |
| GAIF01018223.1 | 31.55  | 46.55  | 47.32  | 82.6   | 46.89  | 12.99  |
| GAIF01018224.1 | 0      | 0      | 0      | 0.54   | 0.99   | 0      |
| GAIF01018225.1 | 0.27   | 0.42   | 0.06   | 0.23   | 0.18   | 1.08   |
| GAIF01018226.1 | 29.01  | 9.75   | 4.13   | 23.71  | 32.49  | 37.95  |
| GAIF01018227.1 | 0.08   | 0      | 0      | 0.88   | 0      | 0.08   |
| GAIF01018228.1 | 107.18 | 15.06  | 47.38  | 58.38  | 6.15   | 132.12 |
| GAIF01018229.1 | 0      | 0      | 0      | 0      | 4.52   | 0      |
| GAIF01018231.1 | 143.25 | 167.71 | 182.23 | 113.65 | 109.83 | 200.77 |
| GAIF01018232.1 | 0      | 0      | 0      | 0.61   | 0      | 0.14   |
| GAIF01018234.1 | 1.71   | 0.79   | 0      | 13.15  | 18.87  | 0.16   |
| GAIF01018236.1 | 0.2    | 0.22   | 0.18   | 0.14   | 0.2    | 0.02   |
| GAIF01018237.1 | 0.11   | 0      | 0      | 0.3    | 1.35   | 0.04   |
| GAIF01018238.1 | 0.93   | 0.2    | 0.1    | 3.66   | 10.71  | 1.43   |
| GAIF01018239.1 | 62.71  | 60.9   | 43.49  | 104.53 | 119.36 | 90.59  |
| GAIF01018241.1 | 0.27   | 0.15   | 0.08   | 0.72   | 0.91   | 0.3    |
| GAIF01018242.1 | 0      | 0      | 0      | 0.3    | 1.38   | 0.05   |
| GAIF01018243.1 | 69.43  | 102.41 | 169.86 | 74.65  | 62.94  | 75.11  |
| GAIF01018244.1 | 3.61   | 1.88   | 2.38   | 0.17   | 0.52   | 0      |
| GAIF01018245.1 | 23.68  | 16.62  | 13.53  | 43.31  | 26.16  | 13.65  |
| GAIF01018246.1 | 1.78   | 2      | 2.37   | 3.46   | 1.6    | 0.98   |
| GAIF01018247.1 | 12.8   | 8.17   | 10.14  | 23.57  | 41.13  | 17.83  |
| GAIF01018248.1 | 33.81  | 160.42 | 23.17  | 58.56  | 342.35 | 13.78  |
| GAIF01018251.1 | 0      | 0.09   | 0      | 0.09   | 0.09   | 0.17   |
| GAIF01018253.1 | 0.41   | 0      | 0      | 0.24   | 2.22   | 3.39   |
| GAIF01018255.1 | 0.26   | 0.11   | 0.06   | 2.11   | 7.07   | 0.06   |
| GAIF01018256.1 | 0      | 0      | 0      | 0.1    | 0.1    | 0      |
| GAIF01018261.1 | 0      | 0.31   | 0      | 0      | 1.69   | 0      |
| GAIF01018262.1 | 0.54   | 0.18   | 0.08   | 0.25   | 0      | 0      |
| GAIF01018263.1 | 0.1    | 0      | 0      | 0.06   | 0.06   | 0      |
| GAIF01018265.1 | 43.13  | 67.54  | 62.44  | 58.59  | 57.14  | 12.44  |
| GAIF01018266.1 | 146.75 | 56.94  | 21.54  | 62.71  | 90.34  | 73.76  |
| GAIF01018267.1 | 0      | 0.08   | 0      | 0.08   | 0.64   | 0      |
| GAIF01018268.1 | 0      | 0.04   | 0      | 0      | 0      | 0      |
| GAIF01018271.1 | 0.64   | 1.05   | 0.35   | 0.62   | 0.9    | 0.24   |
| GAIF01018272.1 | 15.24  | 10.19  | 10.38  | 39.98  | 55.84  | 6.44   |
| GAIF01018274.1 | 53.55  | 32.31  | 37.76  | 112.03 | 61.67  | 49.24  |
| GAIF01018275.1 | 0      | 0      | 0      | 0.18   | 0.37   | 0      |
| GAIF01018276.1 | 0.06   | 0      | 0.06   | 0      | 0      | 0      |

|                |         |         |         |         |         |         |
|----------------|---------|---------|---------|---------|---------|---------|
| GAIF01018277.1 | 1962.32 | 3087.02 | 5359.93 | 3042.32 | 2523.36 | 1546.14 |
| GAIF01018278.1 | 0       | 0       | 0       | 0       | 0.42    | 0       |
| GAIF01018279.1 | 0.27    | 0.44    | 0.3     | 0.94    | 1.78    | 0       |
| GAIF01018280.1 | 0       | 0       | 0       | 0       | 0.09    | 0       |
| GAIF01018281.1 | 0       | 0       | 0       | 0       | 0       | 0.16    |
| GAIF01018282.1 | 35.58   | 53.26   | 19.05   | 74.03   | 57.43   | 6.98    |
| GAIF01018283.1 | 0       | 0.97    | 1.55    | 0       | 0       | 0.25    |
| GAIF01018284.1 | 0.52    | 0       | 0.01    | 0.46    | 0.31    | 0.09    |
| GAIF01018285.1 | 0.08    | 0.17    | 0       | 0       | 0.1     | 0       |
| GAIF01018286.1 | 0       | 0.2     | 0       | 0       | 0.11    | 0.2     |
| GAIF01018287.1 | 1.44    | 1.78    | 0.46    | 6.35    | 13.12   | 0.34    |
| GAIF01018289.1 | 0.02    | 0       | 0       | 0.03    | 0.07    | 0.03    |
| GAIF01018292.1 | 69.22   | 24.22   | 138.8   | 46.55   | 12.67   | 48.58   |
| GAIF01018293.1 | 0       | 0       | 0       | 0       | 0.14    | 0       |
| GAIF01018294.1 | 0       | 0.33    | 0       | 0.53    | 0.55    | 0.67    |
| GAIF01018295.1 | 0       | 0       | 0.09    | 0       | 2.93    | 0.09    |
| GAIF01018296.1 | 0.17    | 0.27    | 0       | 0       | 0.2     | 0       |
| GAIF01018298.1 | 0.14    | 0       | 0       | 0       | 0       | 0       |
| GAIF01018299.1 | 0.13    | 0.69    | 0       | 5.76    | 11.01   | 0.14    |
| GAIF01018300.1 | 1.94    | 1.05    | 0.64    | 5.18    | 10.73   | 0       |
| GAIF01018302.1 | 0.51    | 1.59    | 2.3     | 0.96    | 1.3     | 3.21    |
| GAIF01018303.1 | 5.75    | 1.68    | 0       | 4.62    | 7.17    | 1.38    |
| GAIF01018304.1 | 8.65    | 6.27    | 6.91    | 17.19   | 12.53   | 11.99   |
| GAIF01018305.1 | 17.8    | 20.11   | 11.87   | 34.28   | 22.38   | 2.76    |
| GAIF01018306.1 | 1.13    | 0.33    | 0.45    | 1.69    | 1.39    | 1.42    |
| GAIF01018307.1 | 0.44    | 0.24    | 0       | 0.26    | 2.39    | 0.73    |
| GAIF01018308.1 | 12.94   | 4.62    | 1.89    | 65.13   | 79.65   | 29.27   |
| GAIF01018309.1 | 13.74   | 9.03    | 15.61   | 23.26   | 9.53    | 10.41   |
| GAIF01018312.1 | 0.72    | 0       | 0.8     | 1.05    | 2.4     | 2.99    |
| GAIF01018313.1 | 0       | 0.03    | 0       | 0       | 0       | 0       |
| GAIF01018314.1 | 1.97    | 2.43    | 3.05    | 6.97    | 1.51    | 2.07    |
| GAIF01018315.1 | 0       | 0       | 0.05    | 0.33    | 0       | 0.49    |
| GAIF01018316.1 | 11.78   | 6.82    | 7.12    | 35.56   | 61.31   | 11.72   |
| GAIF01018317.1 | 0       | 0       | 0       | 1.56    | 1.18    | 0       |
| GAIF01018318.1 | 556.29  | 284.41  | 108.34  | 465.5   | 469     | 87.07   |
| GAIF01018319.1 | 1.77    | 1.82    | 1.1     | 4.27    | 6.29    | 0.74    |
| GAIF01018320.1 | 0       | 0.04    | 0       | 0       | 0.11    | 0       |
| GAIF01018321.1 | 0.08    | 0       | 0       | 0       | 0.14    | 0       |
| GAIF01018323.1 | 2.37    | 2.2     | 2.82    | 4.7     | 4.89    | 1.53    |
| GAIF01018324.1 | 0       | 0       | 0       | 0.24    | 0       | 0       |
| GAIF01018325.1 | 0       | 0       | 0       | 0       | 0.65    | 0       |
| GAIF01018326.1 | 51.15   | 4.9     | 1.99    | 2.18    | 0.94    | 2.03    |
| GAIF01018327.1 | 0       | 0       | 0.7     | 0       | 0       | 0       |
| GAIF01018329.1 | 0.1     | 0.28    | 0.46    | 0.06    | 0.25    | 0.46    |

|                |         |        |         |        |         |         |
|----------------|---------|--------|---------|--------|---------|---------|
| GAIF01018334.1 | 0.44    | 0.43   | 0.39    | 0.39   | 0.27    | 0.32    |
| GAIF01018337.1 | 101.52  | 82.78  | 46.48   | 178.33 | 210.6   | 83.32   |
| GAIF01018340.1 | 38.51   | 48.27  | 24.73   | 31.93  | 44.77   | 8.31    |
| GAIF01018341.1 | 0.16    | 0      | 0       | 0.11   | 0.51    | 0       |
| GAIF01018344.1 | 0       | 0.14   | 0       | 0.44   | 0       | 0.54    |
| GAIF01018346.1 | 775.88  | 12.8   | 0       | 398.29 | 1095.42 | 1571.03 |
| GAIF01018347.1 | 0       | 0      | 0       | 0      | 1.29    | 0       |
| GAIF01018348.1 | 0       | 0      | 0       | 0      | 0.05    | 0       |
| GAIF01018351.1 | 0       | 0      | 0       | 0      | 0.17    | 0       |
| GAIF01018352.1 | 1.28    | 1.22   | 1.14    | 4.92   | 5.39    | 1.15    |
| GAIF01018354.1 | 1.1     | 0.21   | 0       | 3.26   | 5.94    | 0.47    |
| GAIF01018355.1 | 0.13    | 0      | 0       | 1.69   | 3.12    | 0       |
| GAIF01018358.1 | 0       | 0      | 0       | 0.03   | 0.06    | 0       |
| GAIF01018360.1 | 0       | 0      | 0       | 0      | 0.14    | 0       |
| GAIF01018361.1 | 24.17   | 23.34  | 5.25    | 3.32   | 14.22   | 0       |
| GAIF01018363.1 | 2.36    | 0.47   | 0       | 11.32  | 28.99   | 0.59    |
| GAIF01018365.1 | 6.15    | 12.92  | 6.35    | 29.78  | 36.65   | 2.45    |
| GAIF01018367.1 | 4.3     | 2.74   | 2.77    | 0.86   | 0.18    | 0.16    |
| GAIF01018368.1 | 172.46  | 179.04 | 148.69  | 342.29 | 300.31  | 53.35   |
| GAIF01018369.1 | 37.66   | 51.88  | 19.4    | 261.21 | 208.21  | 6.05    |
| GAIF01018371.1 | 0       | 3.06   | 1.65    | 0      | 0.11    | 0       |
| GAIF01018372.1 | 1.43    | 2.55   | 4.23    | 6.55   | 9.5     | 3.28    |
| GAIF01018374.1 | 2.81    | 1.53   | 0       | 5.07   | 6.27    | 4.06    |
| GAIF01018375.1 | 10.76   | 2.99   | 0.43    | 19.07  | 25.96   | 1.69    |
| GAIF01018376.1 | 0.13    | 0.07   | 0       | 0.22   | 3.46    | 0       |
| GAIF01018378.1 | 0       | 0      | 0       | 0      | 0.1     | 0       |
| GAIF01018380.1 | 19.54   | 6.5    | 5.85    | 27.09  | 20.16   | 17.05   |
| GAIF01018381.1 | 0.04    | 0      | 0       | 0      | 0.09    | 0       |
| GAIF01018383.1 | 1742.84 | 696.96 | 1007.88 | 445.85 | 25.3    | 443.8   |
| GAIF01018384.1 | 12.07   | 15.32  | 12.35   | 1.08   | 0.46    | 0.24    |
| GAIF01018385.1 | 117.92  | 64.45  | 33.48   | 2.61   | 1.84    | 0.51    |
| GAIF01018386.1 | 0       | 0      | 0       | 0      | 0.04    | 0       |
| GAIF01018388.1 | 0       | 0      | 0       | 0.18   | 0.62    | 0       |
| GAIF01018389.1 | 23.75   | 18.83  | 12.43   | 61     | 69.52   | 8.09    |
| GAIF01018392.1 | 0       | 0      | 0.17    | 0.18   | 1.15    | 0.18    |
| GAIF01018393.1 | 0.11    | 0      | 0       | 0      | 0.28    | 0.88    |
| GAIF01018395.1 | 7.88    | 10.34  | 4.57    | 38.46  | 26.67   | 1.18    |
| GAIF01018396.1 | 0.04    | 0      | 0       | 0.02   | 0       | 0       |
| GAIF01018397.1 | 0       | 0      | 0.23    | 0.16   | 1.18    | 0       |
| GAIF01018398.1 | 215.79  | 274.68 | 161.7   | 228.08 | 170.29  | 33.4    |
| GAIF01018400.1 | 0       | 0.1    | 0       | 1.34   | 1.65    | 0       |
| GAIF01018401.1 | 0       | 2      | 3.45    | 0      | 0.13    | 0.6     |
| GAIF01018402.1 | 0.98    | 1.16   | 0.11    | 0.12   | 0.38    | 0       |
| GAIF01018404.1 | 1.68    | 0.56   | 0.28    | 2.7    | 24.58   | 2       |

|                |         |        |        |        |        |         |
|----------------|---------|--------|--------|--------|--------|---------|
| GAIF01018405.1 | 0.29    | 0.18   | 0.03   | 0.04   | 0.08   | 0       |
| GAIF01018406.1 | 0       | 0.08   | 0.08   | 0.35   | 1.35   | 0       |
| GAIF01018407.1 | 0.65    | 1.32   | 0.89   | 2.54   | 6.62   | 0.8     |
| GAIF01018408.1 | 1476.63 | 710.92 | 444.1  | 483.74 | 779.33 | 6226.29 |
| GAIF01018409.1 | 0       | 0      | 0      | 0.09   | 0.76   | 0       |
| GAIF01018410.1 | 33.25   | 34.65  | 29.72  | 59.71  | 47.23  | 93.01   |
| GAIF01018411.1 | 14.81   | 27.6   | 21.34  | 29.93  | 20.08  | 4.02    |
| GAIF01018412.1 | 541.35  | 485.44 | 605.78 | 99.54  | 49.1   | 98.71   |
| GAIF01018414.1 | 0       | 0.11   | 0      | 0      | 0.12   | 0       |
| GAIF01018415.1 | 0       | 0      | 0.09   | 0      | 0      | 0       |
| GAIF01018416.1 | 0.21    | 0      | 0      | 0.21   | 1.15   | 0       |
| GAIF01018419.1 | 36.31   | 23.21  | 16.86  | 50.71  | 33.47  | 31.09   |
| GAIF01018420.1 | 1.17    | 0.22   | 0      | 2.89   | 10.98  | 0.5     |
| GAIF01018421.1 | 0.35    | 0.88   | 0.13   | 0.81   | 1.26   | 0.26    |
| GAIF01018422.1 | 1649.36 | 773.79 | 902.87 | 17.66  | 12.21  | 34.05   |
| GAIF01018423.1 | 0.66    | 0.09   | 0      | 0      | 0      | 0       |
| GAIF01018424.1 | 10.96   | 5.75   | 5.84   | 34.98  | 73.17  | 51.1    |
| GAIF01018425.1 | 0.08    | 0.06   | 0      | 1.71   | 4.86   | 0       |
| GAIF01018426.1 | 29.68   | 28.72  | 24.67  | 32.8   | 15.63  | 7.67    |
| GAIF01018427.1 | 0       | 0      | 0      | 0      | 0.33   | 0       |
| GAIF01018428.1 | 4.79    | 7.31   | 3.2    | 1      | 0.63   | 0.03    |
| GAIF01018430.1 | 0.15    | 0.45   | 0      | 0.6    | 0.84   | 0       |
| GAIF01018431.1 | 0.01    | 0      | 0.07   | 0.01   | 0      | 0       |
| GAIF01018432.1 | 0       | 0      | 0      | 0      | 0.13   | 0       |
| GAIF01018433.1 | 1.47    | 0.16   | 0.08   | 5.11   | 18.63  | 8.49    |
| GAIF01018434.1 | 0.94    | 0.57   | 0.23   | 9.67   | 28.19  | 0.11    |
| GAIF01018435.1 | 0       | 0      | 0      | 0.12   | 0.06   | 0       |
| GAIF01018436.1 | 0       | 0      | 0      | 0.23   | 0.12   | 0       |
| GAIF01018438.1 | 0.65    | 0.24   | 0      | 0      | 0      | 0.31    |
| GAIF01018439.1 | 0.74    | 1.21   | 0.2    | 0.43   | 0.22   | 0.2     |
| GAIF01018441.1 | 5.14    | 6.64   | 4.3    | 12.32  | 22.44  | 1.1     |
| GAIF01018442.1 | 0       | 0.03   | 0      | 0.15   | 0.4    | 0       |
| GAIF01018444.1 | 8.97    | 15.72  | 12.86  | 30.63  | 13.82  | 5.88    |
| GAIF01018446.1 | 34.46   | 25.89  | 11.12  | 61.68  | 53.14  | 10.65   |
| GAIF01018447.1 | 0       | 0.06   | 0.14   | 0      | 0.41   | 0.01    |
| GAIF01018448.1 | 0       | 0.09   | 0      | 0.1    | 0      | 0       |
| GAIF01018449.1 | 0       | 0      | 0      | 0      | 0      | 0.4     |
| GAIF01018451.1 | 0       | 0      | 0      | 0      | 0.11   | 0       |
| GAIF01018452.1 | 0       | 0      | 0      | 0.42   | 0      | 0       |
| GAIF01018454.1 | 0.1     | 0.64   | 1.73   | 0.11   | 0      | 0.98    |
| GAIF01018455.1 | 3.05    | 3.79   | 3.73   | 7.48   | 4.61   | 1.15    |
| GAIF01018457.1 | 0.19    | 0      | 0      | 0      | 0      | 0       |
| GAIF01018458.1 | 27.04   | 6.53   | 6.1    | 38.87  | 77.01  | 40.36   |
| GAIF01018459.1 | 784.79  | 737.94 | 224.53 | 109.48 | 74.61  | 15.2    |

|                |        |        |        |        |        |        |
|----------------|--------|--------|--------|--------|--------|--------|
| GAIF01018461.1 | 0.3    | 0      | 0.09   | 0.31   | 0.4    | 0.09   |
| GAIF01018462.1 | 0      | 0.05   | 0.01   | 0.03   | 0      | 0.03   |
| GAIF01018463.1 | 0      | 0      | 0.03   | 0.01   | 0.06   | 0      |
| GAIF01018464.1 | 0      | 0      | 0      | 0.18   | 0.57   | 0      |
| GAIF01018465.1 | 183.6  | 253.19 | 169.39 | 90.62  | 133.35 | 303.37 |
| GAIF01018466.1 | 0      | 0      | 0      | 0.69   | 0.68   | 0      |
| GAIF01018467.1 | 0.07   | 0.08   | 0      | 0.1    | 0.05   | 0      |
| GAIF01018469.1 | 0.24   | 0.48   | 0.46   | 0.38   | 0.59   | 0.16   |
| GAIF01018470.1 | 0.61   | 0.67   | 0.57   | 3.44   | 8.55   | 0.83   |
| GAIF01018471.1 | 0      | 0      | 0.2    | 0.14   | 0.57   | 0.07   |
| GAIF01018472.1 | 14.92  | 17.86  | 17.25  | 49.16  | 53.42  | 10.13  |
| GAIF01018474.1 | 0      | 0      | 0      | 0.04   | 0      | 0      |
| GAIF01018475.1 | 2.31   | 3.01   | 0.58   | 1.5    | 4.38   | 1.13   |
| GAIF01018476.1 | 3.19   | 5.58   | 3.96   | 5.24   | 7.29   | 0.57   |
| GAIF01018477.1 | 0.12   | 0.2    | 0.53   | 0.07   | 0      | 0      |
| GAIF01018478.1 | 1.2    | 0      | 0      | 1.75   | 1.29   | 0      |
| GAIF01018481.1 | 0      | 0      | 0      | 0.08   | 0      | 0      |
| GAIF01018482.1 | 0      | 0      | 0      | 0      | 0.05   | 0      |
| GAIF01018484.1 | 0      | 0      | 0      | 0      | 0      | 0.09   |
| GAIF01018485.1 | 20.93  | 4.57   | 17.61  | 35.66  | 31.68  | 1.8    |
| GAIF01018486.1 | 0.59   | 0.24   | 1.05   | 1.64   | 0.16   | 0.31   |
| GAIF01018487.1 | 24.69  | 16.62  | 19.79  | 29.56  | 22.46  | 29.51  |
| GAIF01018488.1 | 44.4   | 83.76  | 21.19  | 81.73  | 98.18  | 5.08   |
| GAIF01018489.1 | 378.14 | 583.19 | 716.44 | 465.62 | 307.13 | 207.99 |
| GAIF01018490.1 | 306.16 | 355.69 | 245.46 | 287.86 | 377.67 | 236.83 |
| GAIF01018493.1 | 0.08   | 0.43   | 0.69   | 0      | 0.1    | 0      |
| GAIF01018494.1 | 1.94   | 12.67  | 2.13   | 11.27  | 7.01   | 0      |
| GAIF01018497.1 | 0.47   | 0.3    | 0      | 0.23   | 0.33   | 0      |
| GAIF01018499.1 | 0.09   | 0      | 0      | 0      | 0      | 0.19   |
| GAIF01018500.1 | 0      | 2.76   | 2      | 0      | 0      | 0      |
| GAIF01018501.1 | 240.03 | 1148.6 | 846.73 | 143.05 | 345    | 324.64 |
| GAIF01018502.1 | 0      | 0      | 0.11   | 0.12   | 0      | 0.55   |
| GAIF01018503.1 | 14.92  | 18.52  | 17.37  | 21.8   | 15.31  | 8.93   |
| GAIF01018504.1 | 22.12  | 39.94  | 22.54  | 47.79  | 46.59  | 5.72   |
| GAIF01018505.1 | 0.85   | 0.08   | 0      | 1.48   | 5.78   | 2.8    |
| GAIF01018507.1 | 1.54   | 1.52   | 1.69   | 3.08   | 11.42  | 0.62   |
| GAIF01018510.1 | 46.42  | 37.31  | 53.81  | 135.58 | 71.68  | 149.18 |
| GAIF01018511.1 | 4.55   | 3.5    | 0.54   | 9.04   | 50.82  | 0      |
| GAIF01018512.1 | 0.68   | 0.21   | 0.46   | 0.92   | 2.62   | 0.25   |
| GAIF01018514.1 | 0.09   | 0      | 0      | 0      | 0      | 0      |
| GAIF01018517.1 | 0.08   | 0.07   | 0.14   | 0      | 0.08   | 0.01   |
| GAIF01018521.1 | 1.24   | 0.92   | 0      | 10.67  | 31.78  | 0.25   |
| GAIF01018523.1 | 0      | 0      | 0.13   | 0      | 0      | 0      |
| GAIF01018524.1 | 0.47   | 1.19   | 3.94   | 1.81   | 2.44   | 2.23   |

|                |        |       |       |        |        |       |
|----------------|--------|-------|-------|--------|--------|-------|
| GAIF01018526.1 | 1.33   | 4.76  | 1.6   | 0.46   | 1.44   | 0     |
| GAIF01018527.1 | 0      | 35.81 | 30.94 | 0      | 0.13   | 1.95  |
| GAIF01018528.1 | 0      | 0     | 0     | 0      | 0.7    | 0     |
| GAIF01018529.1 | 0      | 0     | 0     | 0      | 0.11   | 0     |
| GAIF01018530.1 | 0      | 0     | 0     | 0.08   | 0      | 0     |
| GAIF01018531.1 | 0      | 0.25  | 0.06  | 0      | 0      | 0.13  |
| GAIF01018532.1 | 4.74   | 11.98 | 2.56  | 30.6   | 36.6   | 0.81  |
| GAIF01018533.1 | 16.66  | 25.94 | 33.07 | 40.33  | 18.93  | 9.81  |
| GAIF01018534.1 | 36.61  | 75.51 | 41.56 | 138.49 | 191.03 | 14.91 |
| GAIF01018536.1 | 0      | 0     | 0     | 0.44   | 7.27   | 0     |
| GAIF01018537.1 | 0.11   | 0     | 0     | 0.23   | 0.9    | 0     |
| GAIF01018538.1 | 1.33   | 0.72  | 0.31  | 1.43   | 1.37   | 1.99  |
| GAIF01018540.1 | 0.32   | 0.28  | 0.35  | 2.6    | 0.8    | 0.19  |
| GAIF01018541.1 | 2.06   | 1.34  | 0.39  | 0.29   | 0      | 0.09  |
| GAIF01018543.1 | 0.03   | 0.22  | 0.03  | 0.06   | 0.35   | 0.02  |
| GAIF01018545.1 | 0      | 0     | 0     | 15.21  | 15.76  | 0     |
| GAIF01018546.1 | 0.08   | 0     | 0     | 0.18   | 0.27   | 0     |
| GAIF01018547.1 | 1.06   | 0.58  | 0.52  | 0.21   | 0      | 0.13  |
| GAIF01018549.1 | 11.09  | 3.9   | 0     | 0      | 0      | 0     |
| GAIF01018550.1 | 0      | 0     | 0.14  | 0      | 0      | 0     |
| GAIF01018553.1 | 0.05   | 0.16  | 0.21  | 0.11   | 0.04   | 0.12  |
| GAIF01018555.1 | 0.12   | 0     | 0.04  | 0      | 0      | 0.07  |
| GAIF01018556.1 | 0      | 0.06  | 0.06  | 0.06   | 0.14   | 0     |
| GAIF01018557.1 | 0      | 0     | 0     | 0      | 0.04   | 0     |
| GAIF01018558.1 | 13.8   | 18    | 7.32  | 57.16  | 66.95  | 4.26  |
| GAIF01018559.1 | 10.35  | 21.18 | 11.23 | 36.77  | 26.83  | 2.99  |
| GAIF01018561.1 | 4.18   | 4.32  | 2.87  | 4.48   | 3.54   | 0.67  |
| GAIF01018562.1 | 206.24 | 65.56 | 32.15 | 16.84  | 11.9   | 4.67  |
| GAIF01018563.1 | 0.39   | 0.42  | 0.43  | 0.11   | 0.7    | 0     |
| GAIF01018565.1 | 0.44   | 0.3   | 0.43  | 0.11   | 0.5    | 0.09  |
| GAIF01018566.1 | 51.06  | 27.91 | 13.35 | 205.55 | 125.8  | 54.01 |
| GAIF01018567.1 | 12.69  | 6.52  | 8.61  | 23.97  | 11.1   | 3.56  |
| GAIF01018570.1 | 0      | 0     | 0     | 0      | 0.1    | 0     |
| GAIF01018571.1 | 0.24   | 0.03  | 0.1   | 0.67   | 6.84   | 0     |
| GAIF01018573.1 | 0.29   | 0.11  | 0     | 0.11   | 0      | 0.11  |
| GAIF01018574.1 | 0.13   | 0.09  | 0.02  | 0.11   | 0.37   | 0.02  |
| GAIF01018576.1 | 7.09   | 13.02 | 6.57  | 13.79  | 36.35  | 3.13  |
| GAIF01018577.1 | 0      | 0.1   | 0     | 0      | 0      | 0     |
| GAIF01018578.1 | 0.68   | 0     | 0.13  | 3.71   | 6.18   | 0     |
| GAIF01018579.1 | 2.37   | 0.05  | 0.39  | 1.29   | 7.04   | 0.06  |
| GAIF01018580.1 | 0      | 0     | 0     | 0.24   | 0      | 0     |
| GAIF01018581.1 | 0      | 0     | 0     | 0      | 0.25   | 0     |
| GAIF01018582.1 | 5.5    | 3.93  | 2.76  | 2.98   | 5.05   | 2.83  |
| GAIF01018583.1 | 0      | 0     | 0     | 0      | 0.01   | 0     |

|                |        |        |        |         |         |        |
|----------------|--------|--------|--------|---------|---------|--------|
| GAIF01018584.1 | 0      | 0      | 0      | 0       | 18.6    | 0      |
| GAIF01018585.1 | 0      | 0      | 0      | 0.31    | 0       | 0      |
| GAIF01018587.1 | 120.83 | 98.34  | 92.85  | 105.47  | 104.94  | 27.71  |
| GAIF01018588.1 | 1.18   | 0.08   | 0.08   | 0.68    | 3.37    | 0      |
| GAIF01018590.1 | 1.62   | 0.33   | 0      | 0.83    | 5.38    | 0      |
| GAIF01018592.1 | 10.42  | 8.57   | 12.47  | 22.95   | 13.18   | 13.25  |
| GAIF01018595.1 | 0      | 0.08   | 0      | 0       | 0       | 0      |
| GAIF01018596.1 | 1.23   | 1.05   | 2.61   | 0.67    | 0.23    | 0.53   |
| GAIF01018597.1 | 0.31   | 0.67   | 0.15   | 1.97    | 4.38    | 0.11   |
| GAIF01018598.1 | 0      | 0      | 0      | 0.18    | 0       | 0      |
| GAIF01018601.1 | 0      | 0      | 0      | 0       | 0.12    | 0      |
| GAIF01018603.1 | 0      | 0      | 0.86   | 0       | 0.44    | 0.05   |
| GAIF01018604.1 | 0      | 0      | 0      | 0       | 0.13    | 0      |
| GAIF01018605.1 | 0.7    | 0      | 0      | 1.54    | 13.5    | 1.5    |
| GAIF01018606.1 | 0.18   | 0      | 0.4    | 0       | 0.87    | 0      |
| GAIF01018607.1 | 56.63  | 61.08  | 67.46  | 25.64   | 23.6    | 20.15  |
| GAIF01018609.1 | 0.13   | 0.04   | 0      | 0       | 0.17    | 0      |
| GAIF01018610.1 | 0.24   | 0      | 0      | 0.28    | 0.17    | 0      |
| GAIF01018611.1 | 847.44 | 644.64 | 257.18 | 1577.32 | 1309.97 | 497.32 |
| GAIF01018613.1 | 0      | 0      | 0      | 0       | 0.09    | 0.08   |
| GAIF01018614.1 | 98.42  | 52.32  | 94.83  | 226.55  | 264.9   | 474.83 |
| GAIF01018615.1 | 0      | 0      | 0      | 0.28    | 0.29    | 0      |
| GAIF01018616.1 | 0      | 0      | 0      | 0       | 0.1     | 0      |
| GAIF01018617.1 | 3.39   | 3.58   | 2.61   | 12.51   | 10.37   | 6.19   |
| GAIF01018619.1 | 84.39  | 117.54 | 224.21 | 116.35  | 88.9    | 188.05 |
| GAIF01018620.1 | 82.68  | 69.71  | 28.16  | 89.01   | 89.45   | 129.18 |
| GAIF01018622.1 | 21.78  | 20.42  | 41.82  | 30.73   | 19.07   | 40.8   |
| GAIF01018623.1 | 0      | 0      | 0.01   | 0.03    | 0.02    | 0      |
| GAIF01018624.1 | 0.16   | 0      | 0      | 1.4     | 1.85    | 0      |
| GAIF01018625.1 | 77.64  | 41.33  | 34.72  | 99.49   | 85.2    | 28.7   |
| GAIF01018626.1 | 0      | 0      | 4.32   | 3.64    | 13.3    | 0      |
| GAIF01018627.1 | 2.96   | 1.31   | 0      | 7.38    | 6.98    | 0.58   |
| GAIF01018628.1 | 0.4    | 0.14   | 0      | 0       | 0       | 0      |
| GAIF01018629.1 | 14.42  | 4.4    | 7.49   | 37.57   | 73.48   | 17.6   |
| GAIF01018630.1 | 0      | 0      | 0.02   | 0       | 0       | 0      |
| GAIF01018631.1 | 0      | 0.05   | 0      | 0       | 0.13    | 0      |
| GAIF01018633.1 | 0.2    | 0.43   | 0      | 1.38    | 4.36    | 1.96   |
| GAIF01018634.1 | 7.49   | 6      | 6.71   | 22.13   | 15.99   | 7.01   |
| GAIF01018635.1 | 0.12   | 0.89   | 0.46   | 0.1     | 0.41    | 0.21   |
| GAIF01018637.1 | 14.02  | 14.64  | 10.16  | 16.27   | 9.92    | 1.72   |
| GAIF01018638.1 | 0      | 0      | 0      | 0       | 0       | 0.04   |
| GAIF01018639.1 | 0.17   | 0      | 0      | 0.31    | 1.74    | 0      |
| GAIF01018640.1 | 16.78  | 17.9   | 18.01  | 52.62   | 51.62   | 9.87   |
| GAIF01018641.1 | 0      | 0      | 0.54   | 1.9     | 19.61   | 0      |

|                |        |        |       |        |        |       |
|----------------|--------|--------|-------|--------|--------|-------|
| GAIF01018643.1 | 5.31   | 4.22   | 4.26  | 9.92   | 15.8   | 9.81  |
| GAIF01018644.1 | 0      | 0      | 0     | 0.17   | 0.19   | 0.03  |
| GAIF01018645.1 | 0.38   | 0.24   | 0.26  | 0.65   | 0.22   | 0.16  |
| GAIF01018647.1 | 8.79   | 7.37   | 6.26  | 5.13   | 4.71   | 1.71  |
| GAIF01018648.1 | 0      | 0      | 0     | 0      | 0.5    | 0     |
| GAIF01018649.1 | 0.12   | 0      | 0     | 0.96   | 1.71   | 0.65  |
| GAIF01018650.1 | 76.73  | 28.39  | 72.09 | 5.07   | 50.77  | 0     |
| GAIF01018652.1 | 0      | 0      | 0.04  | 0.37   | 2.36   | 0.88  |
| GAIF01018654.1 | 0.35   | 0      | 0.43  | 0.24   | 0.48   | 0.17  |
| GAIF01018655.1 | 0      | 0.06   | 0.06  | 0      | 0      | 0.06  |
| GAIF01018657.1 | 8.73   | 0.85   | 3.45  | 6.89   | 0.74   | 0.77  |
| GAIF01018659.1 | 0      | 0      | 0     | 0      | 0.68   | 0     |
| GAIF01018661.1 | 1.34   | 1.11   | 1.06  | 0.07   | 0.31   | 0.07  |
| GAIF01018662.1 | 0.63   | 0.99   | 1.21  | 0.48   | 0.46   | 0.37  |
| GAIF01018663.1 | 0      | 0      | 0     | 0      | 1.52   | 0     |
| GAIF01018665.1 | 0      | 0      | 0     | 0      | 0.21   | 0     |
| GAIF01018668.1 | 93.93  | 73.09  | 56.8  | 127.57 | 83.06  | 48.81 |
| GAIF01018670.1 | 0.06   | 0      | 0     | 0      | 0.19   | 0     |
| GAIF01018671.1 | 0.03   | 0.03   | 0     | 0      | 0.05   | 0     |
| GAIF01018672.1 | 0      | 0.16   | 0     | 0.17   | 0.31   | 0.11  |
| GAIF01018674.1 | 10.39  | 5.68   | 1.52  | 15.39  | 43.77  | 10.08 |
| GAIF01018676.1 | 0      | 0.07   | 0     | 0      | 0.44   | 0     |
| GAIF01018677.1 | 0.31   | 0.23   | 0.46  | 1.27   | 2.33   | 0.4   |
| GAIF01018679.1 | 0      | 0      | 0     | 0.13   | 0.13   | 0     |
| GAIF01018680.1 | 1.5    | 0.21   | 0     | 2.12   | 0.38   | 0.42  |
| GAIF01018681.1 | 113.06 | 138.22 | 98.73 | 199.16 | 122.98 | 26.16 |
| GAIF01018682.1 | 0.15   | 0.17   | 0     | 0.49   | 0.55   | 0.04  |
| GAIF01018684.1 | 2.08   | 0.41   | 0.17  | 4.14   | 11.15  | 2.37  |
| GAIF01018685.1 | 0      | 0      | 0     | 0      | 0      | 0.03  |
| GAIF01018686.1 | 23.16  | 21.13  | 33.91 | 16.99  | 8.84   | 29.19 |
| GAIF01018687.1 | 0.14   | 0      | 0.05  | 0.99   | 2.77   | 0.42  |
| GAIF01018688.1 | 0.01   | 0      | 0     | 0      | 0      | 0     |
| GAIF01018689.1 | 0      | 0      | 0     | 0.08   | 0      | 0     |
| GAIF01018690.1 | 1.65   | 1.8    | 1.64  | 6.05   | 13.06  | 1.37  |
| GAIF01018691.1 | 0      | 0.34   | 0     | 0      | 0      | 0     |
| GAIF01018692.1 | 2.87   | 0.1    | 0.74  | 3.28   | 2.24   | 9.28  |
| GAIF01018693.1 | 4.47   | 3.32   | 3.9   | 22.63  | 32.21  | 2.75  |
| GAIF01018694.1 | 0.5    | 0.18   | 1.1   | 0.95   | 1.54   | 0     |
| GAIF01018695.1 | 0.65   | 0.66   | 0.92  | 0.16   | 0.06   | 0.26  |
| GAIF01018697.1 | 0      | 0.04   | 0     | 0      | 0.39   | 0     |
| GAIF01018698.1 | 0      | 0.12   | 0.12  | 1.18   | 0      | 0     |
| GAIF01018699.1 | 0.1    | 0.22   | 0     | 0.12   | 0.06   | 0.06  |
| GAIF01018700.1 | 0      | 0      | 0     | 0      | 0.01   | 0     |
| GAIF01018701.1 | 6.67   | 4.96   | 1.12  | 21.91  | 63.45  | 2.23  |



|                |         |         |         |        |        |        |
|----------------|---------|---------|---------|--------|--------|--------|
| GAIF01018703.1 | 0.13    | 0       | 0.14    | 0.15   | 0.16   | 0.29   |
| GAIF01018705.1 | 0.41    | 0.15    | 0       | 2.09   | 7.81   | 2.13   |
| GAIF01018709.1 | 0       | 0.21    | 0       | 0      | 0      | 0      |
| GAIF01018710.1 | 29.12   | 2.85    | 2.77    | 15.67  | 0.73   | 2.33   |
| GAIF01018712.1 | 0.2     | 0       | 0       | 0.47   | 3.04   | 0.11   |
| GAIF01018713.1 | 0.07    | 0.36    | 0.14    | 0.08   | 0      | 0      |
| GAIF01018714.1 | 0.14    | 0.42    | 0       | 0      | 0.17   | 0      |
| GAIF01018715.1 | 5.1     | 1.27    | 0.97    | 34.98  | 209.55 | 3.08   |
| GAIF01018717.1 | 0.04    | 0       | 0       | 0.14   | 0.54   | 0      |
| GAIF01018718.1 | 0       | 0       | 0       | 0.15   | 0.61   | 0      |
| GAIF01018719.1 | 73.67   | 33.45   | 24.07   | 114.23 | 128.91 | 23.43  |
| GAIF01018720.1 | 0.83    | 0.34    | 1.76    | 0.3    | 0.51   | 0      |
| GAIF01018721.1 | 15.99   | 2       | 0.78    | 46.71  | 102.33 | 0.62   |
| GAIF01018722.1 | 0       | 0       | 0       | 0.3    | 0      | 0.17   |
| GAIF01018723.1 | 6.87    | 5.19    | 6.14    | 16.08  | 12.32  | 7.7    |
| GAIF01018724.1 | 59      | 64.93   | 69.78   | 120.77 | 112.15 | 82.36  |
| GAIF01018725.1 | 0       | 0.13    | 0       | 2.58   | 11.41  | 0.41   |
| GAIF01018728.1 | 1250.08 | 1306.18 | 1178.43 | 528.11 | 363.86 | 404.37 |
| GAIF01018729.1 | 0       | 0       | 0       | 0      | 0.14   | 0      |
| GAIF01018730.1 | 53.37   | 46.75   | 86.84   | 255.85 | 315.33 | 94.08  |
| GAIF01018731.1 | 52.73   | 82.61   | 78.23   | 45.34  | 42.56  | 33.24  |
| GAIF01018732.1 | 0       | 0       | 0       | 0.84   | 0      | 0.03   |
| GAIF01018734.1 | 0.77    | 1.19    | 0       | 0.43   | 3.54   | 2.67   |
| GAIF01018735.1 | 52.17   | 38.39   | 68.24   | 21.18  | 10.19  | 26.7   |
| GAIF01018737.1 | 0.03    | 0       | 0       | 0.14   | 0.33   | 0.07   |
| GAIF01018738.1 | 10.37   | 14.65   | 8.37    | 21.95  | 18.21  | 11.04  |
| GAIF01018739.1 | 0.07    | 0       | 0.12    | 0.13   | 1.05   | 0.09   |
| GAIF01018741.1 | 0       | 0.43    | 0       | 0      | 0      | 0      |
| GAIF01018742.1 | 0.64    | 0.1     | 0.11    | 8.17   | 34.28  | 0.11   |
| GAIF01018743.1 | 8.39    | 10.39   | 11.49   | 34.17  | 21.89  | 5.78   |
| GAIF01018744.1 | 0.03    | 0.33    | 0.23    | 0.25   | 0.07   | 0      |
| GAIF01018747.1 | 0.35    | 0       | 0       | 2.41   | 12.09  | 0      |
| GAIF01018748.1 | 20.73   | 8.64    | 9.77    | 23.7   | 18.18  | 14.21  |
| GAIF01018750.1 | 0.62    | 0.51    | 0.54    | 4.3    | 1.63   | 3.47   |
| GAIF01018751.1 | 0.16    | 0.17    | 0.17    | 2.03   | 3.73   | 0      |
| GAIF01018753.1 | 0.31    | 0.3     | 0.09    | 0.88   | 3.66   | 0.06   |
| GAIF01018754.1 | 32.48   | 13.87   | 5.18    | 0.36   | 0.22   | 0      |
| GAIF01018755.1 | 1.36    | 1.47    | 0.74    | 0.63   | 0.49   | 0.15   |
| GAIF01018758.1 | 2.95    | 2.75    | 0.78    | 19.62  | 84.12  | 0.32   |
| GAIF01018760.1 | 0.12    | 0.01    | 0.02    | 0.19   | 0.18   | 0.09   |
| GAIF01018761.1 | 3.57    | 1.94    | 0       | 7.05   | 10.17  | 0.39   |
| GAIF01018762.1 | 3.21    | 0       | 0       | 0.95   | 0.08   | 0      |
| GAIF01018763.1 | 0       | 0.09    | 0       | 1.86   | 1.32   | 0.47   |
| GAIF01018764.1 | 11.98   | 4.21    | 2.39    | 32.72  | 41.47  | 3.87   |

|                |        |        |        |        |        |         |
|----------------|--------|--------|--------|--------|--------|---------|
| GAIF01018765.1 | 3.02   | 2.38   | 3.41   | 2      | 1.45   | 3.69    |
| GAIF01018766.1 | 24.79  | 27.14  | 33.23  | 57.84  | 51.06  | 28.69   |
| GAIF01018767.1 | 0      | 0.11   | 0      | 0.12   | 0.12   | 0       |
| GAIF01018769.1 | 9.01   | 7.46   | 7.73   | 30.11  | 35.06  | 9.24    |
| GAIF01018771.1 | 1.4    | 3.03   | 0.13   | 11.48  | 40.86  | 0.07    |
| GAIF01018772.1 | 1.24   | 1.01   | 0.03   | 0.21   | 0.94   | 28.16   |
| GAIF01018773.1 | 7.19   | 3.83   | 2.09   | 1.7    | 0.18   | 0.32    |
| GAIF01018774.1 | 18.83  | 19.58  | 10.89  | 46.98  | 55.05  | 2.04    |
| GAIF01018776.1 | 6.16   | 17.33  | 8.53   | 14.3   | 9.83   | 0.74    |
| GAIF01018777.1 | 3.99   | 5.62   | 4.68   | 1.05   | 0.22   | 0.6     |
| GAIF01018779.1 | 0      | 0.1    | 0      | 0      | 0      | 0       |
| GAIF01018780.1 | 118.73 | 126.25 | 66.82  | 229.87 | 228.81 | 69.78   |
| GAIF01018781.1 | 3.99   | 8.68   | 6.51   | 9.93   | 5.05   | 2.05    |
| GAIF01018782.1 | 0.09   | 0      | 0.05   | 0      | 0.44   | 0       |
| GAIF01018784.1 | 26.46  | 5.44   | 2.84   | 55.48  | 344.87 | 159.94  |
| GAIF01018785.1 | 0.02   | 0      | 0      | 0.02   | 0.08   | 0       |
| GAIF01018787.1 | 0      | 0      | 0      | 0.2    | 1.23   | 0       |
| GAIF01018788.1 | 0      | 0.06   | 0      | 0      | 0      | 0       |
| GAIF01018789.1 | 0.29   | 0.4    | 0.32   | 0.6    | 0.09   | 0.08    |
| GAIF01018790.1 | 2.53   | 0.72   | 1.32   | 0      | 0      | 0.59    |
| GAIF01018791.1 | 0.28   | 0.35   | 0.2    | 0.16   | 0      | 0       |
| GAIF01018792.1 | 0.69   | 0.48   | 0.3    | 2.59   | 7.74   | 0.09    |
| GAIF01018793.1 | 0.03   | 0      | 0      | 0      | 0      | 0       |
| GAIF01018798.1 | 0.03   | 0      | 0      | 0      | 0.12   | 0.02    |
| GAIF01018799.1 | 0.53   | 1.44   | 0.92   | 0.77   | 0.53   | 0.34    |
| GAIF01018800.1 | 0.8    | 0.4    | 0.38   | 1.41   | 1.42   | 0.17    |
| GAIF01018802.1 | 0      | 0.07   | 0      | 0      | 0      | 0       |
| GAIF01018803.1 | 47.97  | 20.48  | 41.02  | 22.5   | 11.22  | 105.07  |
| GAIF01018804.1 | 0.08   | 0.24   | 0      | 0.35   | 2.31   | 0.11    |
| GAIF01018807.1 | 59.89  | 26.84  | 40.14  | 40.22  | 43.19  | 392.05  |
| GAIF01018810.1 | 3.6    | 19.79  | 5.95   | 7.49   | 0.38   | 7.87    |
| GAIF01018811.1 | 0.23   | 0.14   | 0      | 1.19   | 12.07  | 4.63    |
| GAIF01018812.1 | 7.84   | 4.29   | 2.97   | 21.7   | 14.43  | 10.6    |
| GAIF01018813.1 | 3.78   | 5.89   | 2.31   | 7.28   | 6.82   | 0.19    |
| GAIF01018814.1 | 0      | 0      | 0      | 0      | 0.19   | 0       |
| GAIF01018815.1 | 548.26 | 162.38 | 232.72 | 478.66 | 651.82 | 2148.54 |
| GAIF01018816.1 | 0.34   | 0.36   | 0.04   | 0.09   | 0.25   | 0.14    |
| GAIF01018819.1 | 3.2    | 1.06   | 0.18   | 6.03   | 20.38  | 9.13    |
| GAIF01018821.1 | 22.69  | 32.67  | 20.67  | 95.31  | 89.66  | 9.68    |
| GAIF01018823.1 | 0.62   | 0.45   | 0      | 2.4    | 8.33   | 0.34    |
| GAIF01018824.1 | 0.04   | 0      | 0      | 0.02   | 0      | 0       |
| GAIF01018828.1 | 0.39   | 0      | 0      | 0.72   | 3.52   | 0       |
| GAIF01018830.1 | 0      | 0      | 0      | 0.21   | 0      | 0       |
| GAIF01018832.1 | 0.02   | 0      | 0      | 0.11   | 0.74   | 0       |

|                |       |        |        |        |       |        |
|----------------|-------|--------|--------|--------|-------|--------|
| GAIF01018833.1 | 0.24  | 0      | 0      | 0      | 0     | 0      |
| GAIF01018834.1 | 0     | 0      | 0.16   | 0.46   | 2.4   | 0.11   |
| GAIF01018835.1 | 0.03  | 0.03   | 0      | 0.13   | 0.84  | 0      |
| GAIF01018836.1 | 0     | 0      | 0      | 0.09   | 0     | 0      |
| GAIF01018837.1 | 0     | 0      | 0.05   | 0.06   | 0.24  | 0.05   |
| GAIF01018838.1 | 0     | 0      | 0      | 0.12   | 0.16  | 0.24   |
| GAIF01018839.1 | 20.12 | 16.27  | 9.78   | 10.19  | 32.26 | 11.17  |
| GAIF01018840.1 | 0.63  | 0.38   | 0.13   | 5.49   | 19.88 | 0      |
| GAIF01018841.1 | 14.93 | 10.18  | 13.06  | 7.2    | 3.5   | 4.6    |
| GAIF01018842.1 | 0.16  | 0      | 0      | 0      | 0     | 0      |
| GAIF01018843.1 | 0     | 0      | 0      | 0      | 0.62  | 0      |
| GAIF01018844.1 | 0.32  | 0.31   | 0.27   | 2.07   | 4.63  | 0.31   |
| GAIF01018845.1 | 3.44  | 4.11   | 1.04   | 8.78   | 17.38 | 2.53   |
| GAIF01018847.1 | 1.11  | 0.1    | 0.41   | 2.88   | 7.33  | 9.59   |
| GAIF01018849.1 | 0     | 0      | 0      | 0.04   | 0.14  | 0      |
| GAIF01018850.1 | 0     | 0      | 0      | 0      | 0.11  | 0      |
| GAIF01018851.1 | 0     | 0.62   | 1.36   | 0      | 0     | 0.1    |
| GAIF01018852.1 | 0.84  | 0.63   | 0      | 0.47   | 2.53  | 0      |
| GAIF01018853.1 | 0.95  | 1.37   | 0.28   | 13.74  | 34.93 | 0.23   |
| GAIF01018854.1 | 0     | 0      | 0      | 0.05   | 0     | 0      |
| GAIF01018857.1 | 20.54 | 24.35  | 55.64  | 1.17   | 1.42  | 3.34   |
| GAIF01018858.1 | 0     | 0      | 0.25   | 0.25   | 0.52  | 0      |
| GAIF01018859.1 | 27.49 | 21.87  | 44.57  | 76.24  | 30.18 | 58.46  |
| GAIF01018861.1 | 49.89 | 45.79  | 46.19  | 45.94  | 47.4  | 34.14  |
| GAIF01018862.1 | 144.5 | 169.55 | 505.18 | 131.45 | 88.67 | 265.67 |
| GAIF01018863.1 | 0.86  | 0.86   | 1.49   | 1.65   | 1.92  | 2.06   |
| GAIF01018864.1 | 0.06  | 0.03   | 0      | 0.2    | 1.13  | 0.16   |
| GAIF01018865.1 | 23.64 | 30.38  | 16.52  | 12.97  | 23.78 | 21.79  |
| GAIF01018866.1 | 38.63 | 13.81  | 28.75  | 37.15  | 15.11 | 19.68  |
| GAIF01018868.1 | 25.8  | 4.79   | 13.37  | 1.14   | 0.75  | 1.04   |
| GAIF01018869.1 | 1.77  | 4.05   | 3.31   | 10.3   | 14.94 | 1.96   |
| GAIF01018870.1 | 0.14  | 0.15   | 0      | 0.16   | 0     | 0      |
| GAIF01018871.1 | 3.67  | 3.96   | 1.09   | 3.82   | 10.24 | 0.42   |
| GAIF01018872.1 | 0.16  | 0      | 0.03   | 0.62   | 0     | 0      |
| GAIF01018874.1 | 1.31  | 0.24   | 0.24   | 1.86   | 15.54 | 2.98   |
| GAIF01018875.1 | 1.11  | 1.01   | 1.12   | 1.73   | 2.12  | 0.31   |
| GAIF01018876.1 | 4.71  | 9.21   | 2.36   | 14.67  | 14.73 | 0.1    |
| GAIF01018877.1 | 4.61  | 2.58   | 2.4    | 1.58   | 3.31  | 0      |
| GAIF01018880.1 | 8.59  | 4.13   | 4.49   | 10.2   | 12.71 | 7.87   |
| GAIF01018881.1 | 0     | 0.18   | 0      | 0.11   | 0     | 0      |
| GAIF01018882.1 | 6.63  | 16.12  | 15.01  | 17.58  | 11.32 | 8.84   |
| GAIF01018883.1 | 0.9   | 0.29   | 0      | 3.96   | 11.18 | 0.18   |
| GAIF01018884.1 | 0.02  | 0      | 0      | 0.03   | 0.07  | 0.03   |
| GAIF01018885.1 | 8.26  | 4.38   | 6.42   | 10.99  | 5.21  | 13.99  |

|                |        |        |        |        |        |        |
|----------------|--------|--------|--------|--------|--------|--------|
| GAIF01018886.1 | 21.3   | 29.34  | 14.57  | 86.15  | 110.02 | 5.32   |
| GAIF01018887.1 | 1.89   | 2.4    | 1.04   | 5.68   | 8.16   | 0.17   |
| GAIF01018888.1 | 9.91   | 4.93   | 16.09  | 32.79  | 13.69  | 20.1   |
| GAIF01018889.1 | 0.37   | 0      | 0      | 0      | 0.95   | 0      |
| GAIF01018890.1 | 5.66   | 2.96   | 0.3    | 11.07  | 28.93  | 1.28   |
| GAIF01018891.1 | 0      | 0.11   | 0      | 0.08   | 0.65   | 0      |
| GAIF01018892.1 | 1.09   | 0.75   | 0.36   | 7.1    | 11.75  | 0.08   |
| GAIF01018894.1 | 0.04   | 0.11   | 0      | 0      | 0.14   | 0      |
| GAIF01018896.1 | 0.15   | 0.65   | 0.5    | 0.17   | 0.36   | 0      |
| GAIF01018897.1 | 2.54   | 1.38   | 1.63   | 0.25   | 0.06   | 0.06   |
| GAIF01018898.1 | 34.72  | 30.16  | 16.14  | 107.16 | 52.94  | 5.85   |
| GAIF01018899.1 | 0      | 0      | 0      | 0.56   | 0.41   | 0      |
| GAIF01018901.1 | 0      | 0.1    | 0      | 0      | 0      | 0      |
| GAIF01018904.1 | 0      | 0.16   | 0.78   | 0      | 0      | 0      |
| GAIF01018905.1 | 0.73   | 0.3    | 0      | 2.32   | 11.9   | 0.5    |
| GAIF01018907.1 | 34.09  | 34.28  | 37.32  | 45.16  | 26.77  | 29.17  |
| GAIF01018908.1 | 100.25 | 142.1  | 172.39 | 149.56 | 120.34 | 48.31  |
| GAIF01018910.1 | 256.57 | 384.86 | 288.97 | 1.04   | 1.08   | 0.14   |
| GAIF01018911.1 | 0      | 0.13   | 0.05   | 0.57   | 2.06   | 0      |
| GAIF01018912.1 | 0.11   | 0.12   | 0      | 0      | 0.96   | 0      |
| GAIF01018915.1 | 15.33  | 0.3    | 0.84   | 14.44  | 0.82   | 2.39   |
| GAIF01018916.1 | 1.96   | 1.22   | 0.3    | 14.92  | 35.83  | 0      |
| GAIF01018918.1 | 0.39   | 0.13   | 0      | 0.05   | 0      | 0.04   |
| GAIF01018919.1 | 0      | 0      | 0      | 0      | 0.33   | 0      |
| GAIF01018921.1 | 0      | 0      | 0      | 0      | 22.33  | 0      |
| GAIF01018922.1 | 14.18  | 1.03   | 2.82   | 14.38  | 1.84   | 135.71 |
| GAIF01018924.1 | 0      | 0      | 0      | 0.03   | 0.06   | 0      |
| GAIF01018925.1 | 0.04   | 0.22   | 0      | 0.74   | 4.81   | 0.13   |
| GAIF01018927.1 | 1.71   | 0.83   | 1.88   | 1.99   | 2.29   | 0.21   |
| GAIF01018928.1 | 4.22   | 1.87   | 0.72   | 1.18   | 1.83   | 1.13   |
| GAIF01018929.1 | 0.05   | 0.22   | 0.27   | 0.06   | 0      | 0.17   |
| GAIF01018930.1 | 29.86  | 50.15  | 20.8   | 64.68  | 57.73  | 3.74   |
| GAIF01018932.1 | 1.9    | 1.55   | 1.65   | 0.28   | 0.67   | 0.7    |
| GAIF01018933.1 | 0      | 0      | 0      | 0      | 0      | 0.07   |
| GAIF01018934.1 | 0      | 6.76   | 3.76   | 0      | 0      | 0.07   |
| GAIF01018935.1 | 0.03   | 0      | 0      | 0.28   | 0.73   | 0      |
| GAIF01018937.1 | 0.21   | 0.22   | 0.19   | 0.6    | 0.99   | 0      |
| GAIF01018938.1 | 21.24  | 35.89  | 14.48  | 7.21   | 2.42   | 0.26   |
| GAIF01018939.1 | 0      | 0      | 0      | 0      | 0.09   | 0      |
| GAIF01018940.1 | 0.04   | 0.02   | 0.11   | 1.05   | 0      | 0      |
| GAIF01018941.1 | 0.03   | 0      | 0.04   | 0      | 0      | 0      |
| GAIF01018942.1 | 15.81  | 9.49   | 5.97   | 41.87  | 56.89  | 50.36  |
| GAIF01018944.1 | 0      | 3.05   | 1.69   | 0      | 0.06   | 0.23   |
| GAIF01018946.1 | 0.06   | 0      | 0      | 0      | 0.07   | 0      |

|                |        |        |       |        |        |        |
|----------------|--------|--------|-------|--------|--------|--------|
| GAIF01018948.1 | 3.56   | 9.02   | 5.7   | 6.07   | 7.25   | 0.99   |
| GAIF01018951.1 | 0      | 0.05   | 0     | 0      | 0      | 0.03   |
| GAIF01018953.1 | 0      | 0.64   | 1.11  | 0.4    | 0      | 1.39   |
| GAIF01018954.1 | 0      | 0.04   | 0     | 0      | 0      | 0      |
| GAIF01018955.1 | 0.32   | 0.35   | 0.17  | 0      | 0      | 0.35   |
| GAIF01018958.1 | 0.47   | 0.51   | 0.26  | 0      | 0      | 0      |
| GAIF01018959.1 | 9.82   | 7.12   | 8.18  | 26.44  | 27.69  | 8.21   |
| GAIF01018961.1 | 0      | 0      | 0     | 0      | 0      | 0.23   |
| GAIF01018962.1 | 0      | 0      | 0.01  | 0      | 0      | 0      |
| GAIF01018963.1 | 1.8    | 1.03   | 1.51  | 2.89   | 6.82   | 1.14   |
| GAIF01018965.1 | 1.25   | 0.63   | 0.64  | 1.12   | 0.58   | 0.85   |
| GAIF01018966.1 | 0.56   | 0.72   | 0.17  | 4.15   | 14.49  | 0.45   |
| GAIF01018968.1 | 102.1  | 181.96 | 176.8 | 122.38 | 47.76  | 38.24  |
| GAIF01018969.1 | 3.09   | 1.74   | 4.65  | 10.23  | 8.81   | 14.38  |
| GAIF01018970.1 | 0.13   | 0.02   | 0     | 0.51   | 1.94   | 0.05   |
| GAIF01018971.1 | 1.55   | 1.51   | 1.13  | 9.21   | 21.22  | 0.77   |
| GAIF01018972.1 | 0      | 0      | 0     | 0.03   | 0      | 0      |
| GAIF01018973.1 | 0.35   | 4.18   | 1.15  | 3.01   | 2.86   | 0.3    |
| GAIF01018976.1 | 11.94  | 12.02  | 8.53  | 15.69  | 20.25  | 0.52   |
| GAIF01018977.1 | 0.48   | 0.35   | 0.34  | 0.79   | 1.19   | 0.46   |
| GAIF01018978.1 | 0.08   | 1.96   | 1.62  | 0.66   | 0.39   | 0.09   |
| GAIF01018979.1 | 0      | 0      | 0     | 0.26   | 0.05   | 0      |
| GAIF01018980.1 | 6.67   | 2.27   | 0.57  | 4.35   | 28.94  | 0      |
| GAIF01018981.1 | 0      | 0      | 0     | 0.35   | 0      | 0.13   |
| GAIF01018982.1 | 0      | 0.25   | 0     | 0.13   | 0      | 0      |
| GAIF01018983.1 | 3.89   | 1.36   | 0     | 3.71   | 10.02  | 0      |
| GAIF01018984.1 | 0.11   | 0      | 0     | 0.25   | 1.91   | 0      |
| GAIF01018985.1 | 3.51   | 3.56   | 1.8   | 0.34   | 0.45   | 0      |
| GAIF01018986.1 | 0.39   | 0.28   | 0.14  | 0.6    | 3.71   | 0.14   |
| GAIF01018987.1 | 18.49  | 20.31  | 17.65 | 40.93  | 39.46  | 6.78   |
| GAIF01018988.1 | 5.94   | 18     | 3.52  | 15.05  | 22.17  | 0.17   |
| GAIF01018989.1 | 0.94   | 0.89   | 0.09  | 3.14   | 15.31  | 0.14   |
| GAIF01018991.1 | 0.73   | 0      | 0.09  | 1.59   | 4.02   | 0      |
| GAIF01018992.1 | 118.68 | 74.16  | 44.8  | 141.5  | 111.28 | 161.76 |
| GAIF01018994.1 | 0.17   | 0      | 0     | 2.32   | 14.53  | 2.78   |
| GAIF01018995.1 | 11.69  | 23.47  | 12.07 | 44.68  | 25.96  | 3.48   |
| GAIF01018997.1 | 1.66   | 1.4    | 0.2   | 12.12  | 28.97  | 0.47   |
| GAIF01018998.1 | 3.56   | 3.48   | 0.52  | 11.01  | 13.65  | 1.28   |
| GAIF01019001.1 | 30.96  | 6.57   | 27.5  | 14.09  | 11.19  | 36.37  |
| GAIF01019002.1 | 0.09   | 0.02   | 0.06  | 0.35   | 2.34   | 0.02   |
| GAIF01019003.1 | 7.96   | 4.33   | 3.1   | 5.13   | 2.09   | 0.4    |
| GAIF01019004.1 | 24.99  | 19.07  | 23.2  | 59.87  | 33.87  | 21.92  |
| GAIF01019006.1 | 0.17   | 0.06   | 0.19  | 0.98   | 7.28   | 0.37   |
| GAIF01019007.1 | 0      | 0      | 0     | 0.03   | 0      | 0      |

|                |        |        |        |        |        |        |
|----------------|--------|--------|--------|--------|--------|--------|
| GAIF01019008.1 | 0      | 0      | 0      | 0.11   | 1.07   | 0      |
| GAIF01019009.1 | 4.46   | 2.34   | 2.33   | 9.37   | 3.84   | 1.63   |
| GAIF01019010.1 | 1.54   | 2.32   | 0      | 0.44   | 0.48   | 1.93   |
| GAIF01019012.1 | 0      | 0      | 0      | 0.4    | 1.24   | 0      |
| GAIF01019013.1 | 22.36  | 21.69  | 13.28  | 63.44  | 62.92  | 25.01  |
| GAIF01019014.1 | 0      | 0      | 0      | 0      | 36.74  | 15.88  |
| GAIF01019015.1 | 0      | 0.11   | 0      | 0      | 0.82   | 0.22   |
| GAIF01019016.1 | 2.06   | 0.7    | 2.28   | 48.71  | 44     | 325.86 |
| GAIF01019018.1 | 0      | 0      | 0      | 8.49   | 14.6   | 2.69   |
| GAIF01019019.1 | 17.94  | 30.64  | 52.32  | 13.03  | 18.94  | 7.27   |
| GAIF01019021.1 | 0.87   | 1.41   | 1.42   | 2.51   | 0.52   | 0.24   |
| GAIF01019022.1 | 10.75  | 1.8    | 1.53   | 8.46   | 9.78   | 6.52   |
| GAIF01019023.1 | 0      | 0      | 0      | 0.18   | 0      | 0      |
| GAIF01019026.1 | 0      | 0      | 0.48   | 0      | 0.13   | 0      |
| GAIF01019028.1 | 3.31   | 0.38   | 0.19   | 32.47  | 71.96  | 3.85   |
| GAIF01019029.1 | 3.07   | 3.28   | 2.52   | 5.22   | 3.41   | 1      |
| GAIF01019032.1 | 0.08   | 0      | 0.05   | 0      | 0      | 0      |
| GAIF01019033.1 | 114.27 | 279.06 | 191.16 | 26.4   | 23.12  | 10.99  |
| GAIF01019034.1 | 0      | 0      | 0.1    | 0      | 0.21   | 0      |
| GAIF01019035.1 | 3.73   | 6.53   | 2.44   | 3.96   | 3.05   | 0.19   |
| GAIF01019036.1 | 0      | 0      | 0      | 0      | 1.56   | 0      |
| GAIF01019037.1 | 5.38   | 5.91   | 0      | 0.62   | 4.39   | 2.13   |
| GAIF01019038.1 | 3.32   | 4.05   | 2.35   | 4.22   | 4.82   | 0.41   |
| GAIF01019039.1 | 4.55   | 1.62   | 0.52   | 1.07   | 0.28   | 1.41   |
| GAIF01019041.1 | 0.3    | 0.16   | 0      | 1.46   | 3.93   | 0.33   |
| GAIF01019042.1 | 0.04   | 0      | 0.15   | 0.1    | 0.11   | 0      |
| GAIF01019043.1 | 0      | 0.1    | 0      | 0.05   | 0.05   | 0      |
| GAIF01019044.1 | 163.61 | 214.4  | 276.38 | 207.39 | 164.76 | 68.7   |
| GAIF01019046.1 | 0      | 0      | 0      | 0.71   | 0      | 0      |
| GAIF01019047.1 | 0.18   | 0.03   | 0      | 3.53   | 44.15  | 0.21   |
| GAIF01019050.1 | 0.16   | 0      | 0      | 0.09   | 0.98   | 0      |
| GAIF01019051.1 | 55.99  | 56.04  | 73.41  | 65.11  | 54.1   | 21.73  |
| GAIF01019052.1 | 0      | 0      | 0.16   | 0.35   | 1.11   | 0      |
| GAIF01019053.1 | 0.27   | 0.13   | 0.13   | 1.21   | 2      | 0.26   |
| GAIF01019054.1 | 0.12   | 0      | 0      | 0      | 0.15   | 0.14   |
| GAIF01019055.1 | 1.22   | 1.28   | 0.5    | 1.9    | 0      | 0.39   |
| GAIF01019056.1 | 0.27   | 0      | 0      | 0      | 0.97   | 0      |
| GAIF01019057.1 | 4.49   | 2.65   | 2.64   | 15.6   | 21.53  | 9.27   |
| GAIF01019058.1 | 0.34   | 0      | 0      | 3.25   | 7.31   | 0.61   |
| GAIF01019059.1 | 0.46   | 0.19   | 0.08   | 1.6    | 4.03   | 0.23   |
| GAIF01019061.1 | 0.04   | 0      | 0      | 0      | 0      | 0      |
| GAIF01019062.1 | 168.39 | 115.43 | 43.12  | 0.23   | 0.79   | 0.22   |
| GAIF01019064.1 | 0      | 0.17   | 0      | 0      | 1.13   | 0      |
| GAIF01019065.1 | 4.31   | 5.61   | 3.01   | 11.44  | 6.75   | 2.01   |

|                |        |        |       |        |        |        |
|----------------|--------|--------|-------|--------|--------|--------|
| GAIF01019067.1 | 16.52  | 15.18  | 15.19 | 40.58  | 25.81  | 12.99  |
| GAIF01019068.1 | 0      | 0.12   | 0     | 0      | 0      | 0      |
| GAIF01019070.1 | 0.46   | 0      | 0     | 0      | 0      | 0      |
| GAIF01019073.1 | 0      | 0      | 0     | 0      | 0.05   | 0      |
| GAIF01019074.1 | 0      | 0      | 0     | 0.17   | 0      | 0      |
| GAIF01019077.1 | 0      | 6.15   | 1.53  | 15.46  | 10.59  | 13.67  |
| GAIF01019078.1 | 0.15   | 0.13   | 0.5   | 0.23   | 0.24   | 0      |
| GAIF01019079.1 | 0      | 0.19   | 0     | 0.01   | 0.68   | 0      |
| GAIF01019082.1 | 0      | 0.11   | 0.22  | 0.23   | 0.72   | 0      |
| GAIF01019083.1 | 1.04   | 1.03   | 0.94  | 1.09   | 1.4    | 1.52   |
| GAIF01019084.1 | 0      | 0.04   | 0.06  | 0      | 0      | 0      |
| GAIF01019085.1 | 22.13  | 22.14  | 17    | 14.79  | 13.68  | 3.39   |
| GAIF01019086.1 | 2.1    | 1.69   | 2.17  | 1.17   | 0.61   | 1.07   |
| GAIF01019088.1 | 20.43  | 29.99  | 22.15 | 65.71  | 47.88  | 9.19   |
| GAIF01019089.1 | 2.44   | 1.33   | 4.02  | 9.91   | 4.4    | 1.34   |
| GAIF01019090.1 | 258.03 | 194.16 | 66.16 | 679.45 | 700.66 | 52.28  |
| GAIF01019091.1 | 95.09  | 70     | 22.43 | 83.46  | 74.63  | 16.76  |
| GAIF01019092.1 | 3.19   | 4.43   | 1.46  | 13.08  | 28.53  | 0.65   |
| GAIF01019094.1 | 10.02  | 10.4   | 11.09 | 14.72  | 7.55   | 3.99   |
| GAIF01019095.1 | 0      | 0.33   | 0     | 0      | 0.3    | 0      |
| GAIF01019096.1 | 28.82  | 35.53  | 5.02  | 39.56  | 117.48 | 12.97  |
| GAIF01019097.1 | 9.04   | 15.23  | 4.22  | 23.39  | 21.64  | 0.91   |
| GAIF01019098.1 | 97.4   | 57.03  | 90.48 | 95.65  | 45.05  | 429.38 |
| GAIF01019099.1 | 87.29  | 53.47  | 54.26 | 74.04  | 69.82  | 85.43  |
| GAIF01019100.1 | 0      | 0.44   | 0     | 0      | 0.39   | 0      |
| GAIF01019101.1 | 24.96  | 34.93  | 16.08 | 9.83   | 2.32   | 0      |
| GAIF01019102.1 | 1.33   | 4.77   | 7.54  | 8.89   | 9.05   | 0      |
| GAIF01019103.1 | 0      | 0      | 0     | 0.1    | 0      | 0      |
| GAIF01019105.1 | 0.07   | 0      | 0.07  | 0.08   | 0.08   | 0      |
| GAIF01019107.1 | 140.55 | 93.02  | 33.16 | 168.04 | 153.34 | 77.8   |
| GAIF01019108.1 | 0      | 0      | 0     | 0.16   | 0      | 0      |
| GAIF01019110.1 | 8.04   | 12.65  | 4.96  | 6.76   | 44.91  | 7.01   |
| GAIF01019111.1 | 0.09   | 0.04   | 0     | 0.71   | 2.21   | 0      |
| GAIF01019112.1 | 2.94   | 3.07   | 3.6   | 1.9    | 1.02   | 1.43   |
| GAIF01019113.1 | 0      | 0      | 0     | 0      | 0.21   | 0      |
| GAIF01019114.1 | 0.25   | 1.08   | 0.54  | 1.51   | 1.64   | 0      |
| GAIF01019117.1 | 0.82   | 0      | 0     | 1.67   | 8.35   | 1.39   |
| GAIF01019118.1 | 0      | 0      | 0     | 0.1    | 0.72   | 0      |
| GAIF01019119.1 | 0.28   | 0.36   | 0.06  | 1.1    | 3.21   | 0.12   |
| GAIF01019121.1 | 0      | 0      | 0.11  | 0      | 0      | 0      |
| GAIF01019122.1 | 0.21   | 0      | 0     | 0      | 0      | 0      |
| GAIF01019125.1 | 6.21   | 5.27   | 6.98  | 11.07  | 12.74  | 10.18  |
| GAIF01019127.1 | 0      | 0.5    | 0.38  | 0.13   | 0      | 0      |
| GAIF01019128.1 | 34.31  | 32.77  | 44.4  | 61.32  | 24.65  | 32.62  |

|                |       |       |        |       |       |       |
|----------------|-------|-------|--------|-------|-------|-------|
| GAIF01019130.1 | 0     | 0     | 0      | 0     | 0.01  | 0     |
| GAIF01019131.1 | 3.37  | 3.14  | 0.6    | 9.72  | 14.42 | 0.27  |
| GAIF01019132.1 | 0.56  | 0     | 0.1    | 0.11  | 0     | 0     |
| GAIF01019133.1 | 5.71  | 5.17  | 0.57   | 26.23 | 19.68 | 1.93  |
| GAIF01019134.1 | 0     | 0     | 0      | 0.15  | 0     | 0     |
| GAIF01019135.1 | 0     | 0     | 0      | 0     | 0.14  | 0     |
| GAIF01019136.1 | 0     | 0     | 0      | 0     | 0.05  | 0.06  |
| GAIF01019137.1 | 0     | 0     | 0.11   | 0.47  | 2.17  | 0     |
| GAIF01019138.1 | 3.17  | 0.58  | 0.81   | 6.58  | 13.85 | 14.71 |
| GAIF01019139.1 | 0.86  | 1.57  | 0.91   | 3.45  | 1.34  | 0.48  |
| GAIF01019140.1 | 0     | 0.06  | 0      | 0.06  | 0.13  | 0     |
| GAIF01019141.1 | 2.28  | 3.2   | 2.06   | 2.8   | 7.14  | 2.41  |
| GAIF01019142.1 | 0     | 0     | 0      | 0.3   | 0.62  | 0     |
| GAIF01019144.1 | 0.07  | 0     | 0      | 0.08  | 0.09  | 0     |
| GAIF01019147.1 | 7.19  | 1.44  | 2.63   | 16.6  | 52.66 | 75    |
| GAIF01019151.1 | 0     | 1.04  | 0.35   | 0     | 0     | 0.23  |
| GAIF01019152.1 | 2.89  | 3.92  | 4.51   | 7.41  | 4.21  | 2.14  |
| GAIF01019153.1 | 0     | 0.91  | 0.98   | 0     | 0     | 0     |
| GAIF01019154.1 | 14.22 | 8.46  | 23.38  | 11.32 | 8.67  | 13.31 |
| GAIF01019155.1 | 2.8   | 0.66  | 0.17   | 3.51  | 7.55  | 5     |
| GAIF01019156.1 | 7.55  | 5.21  | 3.34   | 17.74 | 26.69 | 14.72 |
| GAIF01019157.1 | 0.12  | 0.2   | 0.14   | 0.15  | 0.31  | 0.07  |
| GAIF01019158.1 | 0     | 0     | 0      | 0     | 0     | 0.12  |
| GAIF01019159.1 | 10.19 | 1.96  | 0      | 23.65 | 43.84 | 7.8   |
| GAIF01019161.1 | 2.81  | 3.18  | 0.37   | 5.55  | 7.17  | 0.25  |
| GAIF01019162.1 | 2.38  | 0.25  | 0.19   | 6.54  | 23.81 | 2.69  |
| GAIF01019163.1 | 54.16 | 30.01 | 4.32   | 10.74 | 9.94  | 0.29  |
| GAIF01019164.1 | 13.21 | 3.46  | 5.29   | 12.39 | 5.17  | 6.93  |
| GAIF01019165.1 | 0     | 0     | 0      | 0.31  | 0.64  | 0     |
| GAIF01019166.1 | 0.64  | 0.48  | 0      | 3.13  | 7.83  | 0     |
| GAIF01019167.1 | 5.89  | 1.59  | 0.86   | 1.17  | 0.2   | 0     |
| GAIF01019168.1 | 0.04  | 0.3   | 0.04   | 0.13  | 1.16  | 0.01  |
| GAIF01019170.1 | 0     | 0     | 0      | 0     | 0.07  | 0     |
| GAIF01019173.1 | 0     | 0.18  | 0      | 0     | 0.2   | 0     |
| GAIF01019175.1 | 0     | 0     | 0      | 1.11  | 7.29  | 0     |
| GAIF01019176.1 | 0     | 0     | 0      | 0.19  | 0.22  | 0     |
| GAIF01019177.1 | 5.07  | 7.94  | 4.41   | 25.99 | 27.73 | 2.03  |
| GAIF01019178.1 | 0     | 0     | 0      | 0.39  | 1.59  | 0     |
| GAIF01019179.1 | 5.67  | 1.19  | 0      | 8.46  | 14.24 | 1.01  |
| GAIF01019181.1 | 0     | 0     | 0.23   | 0.08  | 0.58  | 0     |
| GAIF01019183.1 | 8.35  | 6.16  | 3.57   | 34.34 | 13.62 | 5.15  |
| GAIF01019184.1 | 0     | 0     | 0      | 0     | 0.07  | 0     |
| GAIF01019186.1 | 4.74  | 3.75  | 2.37   | 11.8  | 19.49 | 2.47  |
| GAIF01019187.1 | 44.64 | 58.91 | 127.03 | 52.24 | 34.09 | 86.29 |



|                |        |       |        |       |        |        |
|----------------|--------|-------|--------|-------|--------|--------|
| GAIF01019188.1 | 2.11   | 1.8   | 2.19   | 5.58  | 9.37   | 1.41   |
| GAIF01019189.1 | 13.22  | 9.69  | 16.91  | 50.83 | 31.33  | 11.57  |
| GAIF01019191.1 | 0.14   | 0     | 0      | 0.17  | 0      | 0      |
| GAIF01019193.1 | 1.55   | 0.39  | 0      | 0.97  | 4.89   | 0.26   |
| GAIF01019194.1 | 2.26   | 0.36  | 0.15   | 3.47  | 9.03   | 6      |
| GAIF01019195.1 | 0.04   | 0     | 0      | 0.04  | 0.44   | 0      |
| GAIF01019196.1 | 22.83  | 17.94 | 5.32   | 6.89  | 3.94   | 0.05   |
| GAIF01019197.1 | 0      | 0     | 0      | 0     | 0.17   | 0      |
| GAIF01019198.1 | 17.54  | 21.88 | 11.03  | 14.91 | 11.77  | 1.38   |
| GAIF01019199.1 | 0.04   | 0     | 0      | 0     | 0      | 0      |
| GAIF01019200.1 | 0      | 0.44  | 0      | 0     | 0.06   | 0      |
| GAIF01019201.1 | 1      | 1.82  | 1.34   | 0.36  | 0.97   | 0.1    |
| GAIF01019202.1 | 0.86   | 0.35  | 0      | 0     | 0.26   | 0      |
| GAIF01019203.1 | 0      | 0     | 0      | 0.14  | 0      | 0      |
| GAIF01019204.1 | 1.88   | 0.72  | 0.7    | 0.11  | 0.04   | 0.1    |
| GAIF01019205.1 | 234.96 | 94.29 | 202.12 | 58.9  | 52.52  | 423.67 |
| GAIF01019206.1 | 0      | 0.09  | 0.09   | 0.3   | 2.7    | 0.28   |
| GAIF01019208.1 | 0      | 0     | 0.01   | 0     | 0      | 0      |
| GAIF01019209.1 | 10.25  | 21.2  | 9.48   | 13.78 | 15.66  | 1.27   |
| GAIF01019210.1 | 0      | 0     | 0      | 0.05  | 0.1    | 0      |
| GAIF01019212.1 | 0      | 0     | 0      | 0     | 0      | 0.16   |
| GAIF01019213.1 | 0.27   | 0     | 0      | 0.04  | 0      | 0.04   |
| GAIF01019214.1 | 0.43   | 0     | 0.16   | 0.17  | 0      | 0      |
| GAIF01019216.1 | 11.99  | 26.13 | 17.78  | 11.87 | 7.23   | 12.67  |
| GAIF01019217.1 | 0.33   | 0.17  | 0.03   | 2.09  | 7.61   | 0.06   |
| GAIF01019219.1 | 0.89   | 0.35  | 0.48   | 2.11  | 3.59   | 1.23   |
| GAIF01019221.1 | 0      | 0     | 0      | 0     | 1.23   | 0      |
| GAIF01019222.1 | 30.41  | 24.31 | 7.68   | 66.43 | 107.32 | 6.4    |
| GAIF01019225.1 | 83.47  | 6.2   | 4.15   | 1.89  | 0.9    | 1.06   |
| GAIF01019226.1 | 2.13   | 0.87  | 0.31   | 3.84  | 10.37  | 1.42   |
| GAIF01019227.1 | 0      | 0     | 0.03   | 0.1   | 0      | 0      |
| GAIF01019229.1 | 0.27   | 0.27  | 0.35   | 0.34  | 0      | 0.14   |
| GAIF01019230.1 | 0.08   | 0     | 0      | 2.21  | 3.19   | 0      |
| GAIF01019231.1 | 0      | 0     | 0      | 0     | 0.38   | 0      |
| GAIF01019233.1 | 42.66  | 16.74 | 17.08  | 62.33 | 31.79  | 34.11  |
| GAIF01019235.1 | 10.82  | 6.18  | 8.75   | 16.07 | 11.3   | 11.72  |
| GAIF01019236.1 | 0      | 0     | 0      | 0     | 0      | 0.49   |
| GAIF01019237.1 | 46.73  | 23.66 | 25.25  | 24.83 | 22.85  | 21.9   |
| GAIF01019238.1 | 0      | 0.04  | 0.02   | 0.09  | 0.01   | 0      |
| GAIF01019239.1 | 0.06   | 0     | 0      | 0     | 0      | 0      |
| GAIF01019241.1 | 0      | 0     | 4.62   | 4.18  | 1.26   | 0      |
| GAIF01019242.1 | 3.6    | 1.31  | 0.88   | 18.12 | 36.92  | 0      |
| GAIF01019244.1 | 0      | 0     | 0.47   | 0     | 0      | 0      |
| GAIF01019245.1 | 0      | 7.23  | 10.98  | 0     | 0      | 0.24   |

|                |        |       |        |        |        |         |
|----------------|--------|-------|--------|--------|--------|---------|
| GAIF01019246.1 | 0      | 0.29  | 0      | 0.55   | 1.07   | 0       |
| GAIF01019247.1 | 0      | 0.33  | 0      | 0.17   | 0.12   | 0       |
| GAIF01019248.1 | 5.4    | 2.89  | 1.25   | 6.2    | 5.81   | 0       |
| GAIF01019249.1 | 0      | 0     | 0      | 0.43   | 0.44   | 0       |
| GAIF01019250.1 | 0      | 0     | 0.03   | 0      | 0.34   | 0       |
| GAIF01019253.1 | 1.32   | 0.49  | 0      | 18.69  | 66.76  | 0       |
| GAIF01019254.1 | 0      | 0     | 0      | 0      | 0.49   | 0       |
| GAIF01019255.1 | 0      | 0     | 0.12   | 0      | 0      | 0       |
| GAIF01019256.1 | 75.17  | 3.45  | 1.97   | 134.92 | 289.9  | 7727.62 |
| GAIF01019260.1 | 0      | 0     | 0      | 1.43   | 5.19   | 8.49    |
| GAIF01019261.1 | 0      | 0     | 0      | 0      | 0.06   | 0       |
| GAIF01019264.1 | 0.24   | 0     | 0      | 0.37   | 0.67   | 0.09    |
| GAIF01019265.1 | 0.08   | 0.09  | 0.09   | 0.14   | 0.14   | 0       |
| GAIF01019266.1 | 15.99  | 18.2  | 11.69  | 32.06  | 25.86  | 4.12    |
| GAIF01019268.1 | 0.49   | 0.43  | 0.47   | 0      | 0      | 0       |
| GAIF01019269.1 | 0.38   | 0.42  | 0.7    | 0.3    | 0.15   | 0.42    |
| GAIF01019271.1 | 0.69   | 0.87  | 0      | 0.8    | 0.2    | 0.4     |
| GAIF01019272.1 | 0.66   | 0.36  | 0.45   | 0.29   | 3.09   | 5.38    |
| GAIF01019273.1 | 0      | 0.05  | 0      | 0.34   | 0.56   | 0.29    |
| GAIF01019274.1 | 229.46 | 329.2 | 485.12 | 152.11 | 141.53 | 426.16  |
| GAIF01019275.1 | 0      | 0     | 0      | 0      | 2.8    | 0       |
| GAIF01019276.1 | 2.29   | 1.32  | 1.17   | 12.37  | 13.81  | 0.23    |
| GAIF01019277.1 | 20.81  | 8.92  | 16.99  | 60.77  | 62.7   | 30.03   |
| GAIF01019279.1 | 0.14   | 0.31  | 0      | 0.83   | 2.93   | 0.47    |
| GAIF01019280.1 | 0      | 0.25  | 0      | 0.13   | 0.14   | 0       |
| GAIF01019281.1 | 0      | 1.14  | 0      | 3.15   | 13.78  | 0.97    |
| GAIF01019282.1 | 5.43   | 2.25  | 3.41   | 0.75   | 0.16   | 1.28    |
| GAIF01019283.1 | 0.39   | 0.21  | 0.14   | 1.51   | 3.13   | 0.57    |
| GAIF01019284.1 | 6.96   | 8.11  | 10     | 10.28  | 16.32  | 4.86    |
| GAIF01019286.1 | 0.04   | 0     | 0      | 1.09   | 3.3    | 0.14    |
| GAIF01019287.1 | 0.41   | 0.68  | 0.82   | 0.65   | 0.49   | 0.37    |
| GAIF01019289.1 | 0.5    | 0.6   | 0.47   | 2.72   | 8.05   | 0.39    |
| GAIF01019290.1 | 1.73   | 0.4   | 0.2    | 3.91   | 24.62  | 0.8     |
| GAIF01019291.1 | 2.93   | 1.29  | 2.51   | 3.3    | 1.1    | 1.21    |
| GAIF01019293.1 | 18.24  | 12.48 | 3.38   | 31.05  | 29.14  | 0.61    |
| GAIF01019294.1 | 1.73   | 0.46  | 3.26   | 0.61   | 0.9    | 0       |
| GAIF01019295.1 | 10.49  | 0     | 0      | 0      | 6.31   | 0       |
| GAIF01019296.1 | 20.85  | 12.67 | 29.93  | 38.1   | 20.06  | 58.45   |
| GAIF01019298.1 | 0      | 0.13  | 0      | 0      | 0      | 0       |
| GAIF01019301.1 | 1.41   | 0.54  | 0.25   | 5.37   | 6.58   | 0.21    |
| GAIF01019302.1 | 0.21   | 0.12  | 0.02   | 1.34   | 6.31   | 0.14    |
| GAIF01019305.1 | 7.18   | 8.7   | 6.98   | 17.05  | 11.61  | 4       |
| GAIF01019307.1 | 0      | 0     | 0      | 0      | 0.19   | 0       |
| GAIF01019312.1 | 16.92  | 12.38 | 3.26   | 22.25  | 19.73  | 22.49   |

|                |        |        |        |       |       |       |
|----------------|--------|--------|--------|-------|-------|-------|
| GAIF01019313.1 | 0      | 0      | 0      | 0     | 0.72  | 0     |
| GAIF01019314.1 | 0      | 0      | 0      | 0     | 0     | 0.12  |
| GAIF01019315.1 | 0      | 0.05   | 0.05   | 0.1   | 1.06  | 0     |
| GAIF01019316.1 | 2.56   | 1.58   | 4.9    | 5.05  | 1.34  | 3.81  |
| GAIF01019317.1 | 1.45   | 0      | 0.13   | 1.96  | 10.72 | 6.24  |
| GAIF01019318.1 | 0      | 0      | 0.03   | 0.67  | 0     | 0.13  |
| GAIF01019321.1 | 32.89  | 28.99  | 25.83  | 49.04 | 19.02 | 2.52  |
| GAIF01019322.1 | 0.06   | 0.28   | 0.35   | 0     | 0.08  | 0     |
| GAIF01019323.1 | 1.29   | 3.83   | 0.27   | 1.77  | 2.86  | 0.07  |
| GAIF01019324.1 | 30.53  | 17.44  | 22.63  | 21.21 | 27.94 | 59.14 |
| GAIF01019326.1 | 0.12   | 0.13   | 0      | 0     | 0.14  | 0     |
| GAIF01019327.1 | 0.16   | 0.29   | 0.3    | 0.49  | 0.86  | 0.08  |
| GAIF01019328.1 | 9.73   | 6.43   | 5.26   | 16.94 | 8.55  | 4.04  |
| GAIF01019331.1 | 0.14   | 0.05   | 0.1    | 0.22  | 0.28  | 0.05  |
| GAIF01019332.1 | 0      | 0.06   | 0      | 0.26  | 0.49  | 0     |
| GAIF01019333.1 | 0.11   | 0.06   | 0      | 0     | 0.26  | 0.26  |
| GAIF01019334.1 | 13.73  | 8.16   | 5.37   | 2     | 2.67  | 0.55  |
| GAIF01019336.1 | 0.35   | 0.09   | 0.1    | 0.61  | 2.51  | 0     |
| GAIF01019338.1 | 0.16   | 0      | 0      | 0     | 0     | 0     |
| GAIF01019339.1 | 0.95   | 0.62   | 0      | 2.42  | 4.66  | 0.52  |
| GAIF01019340.1 | 8.34   | 10.06  | 11.04  | 32.47 | 7.64  | 4.3   |
| GAIF01019342.1 | 0.16   | 0      | 0      | 0     | 0     | 0     |
| GAIF01019343.1 | 0      | 0.51   | 0.35   | 0     | 0     | 0.09  |
| GAIF01019344.1 | 26.13  | 8.94   | 8.51   | 17.98 | 8.13  | 6.34  |
| GAIF01019346.1 | 0      | 0      | 0      | 0.07  | 0.73  | 0     |
| GAIF01019347.1 | 0      | 0.17   | 0.42   | 0     | 0     | 0     |
| GAIF01019348.1 | 107.81 | 135.94 | 109.97 | 93.17 | 75.25 | 28.87 |
| GAIF01019349.1 | 9.71   | 0.6    | 0.21   | 1.1   | 6.25  | 1.28  |
| GAIF01019350.1 | 13.75  | 17.55  | 13.45  | 19.31 | 13.06 | 3.51  |
| GAIF01019352.1 | 0.14   | 0.12   | 0.02   | 0.46  | 4.7   | 0     |
| GAIF01019356.1 | 427.36 | 212.52 | 509.82 | 11.8  | 4.31  | 18.74 |
| GAIF01019357.1 | 17.02  | 12.34  | 9.54   | 67.54 | 57.6  | 5.17  |
| GAIF01019359.1 | 0      | 0      | 0      | 0.09  | 0.19  | 0     |
| GAIF01019362.1 | 0.98   | 1.83   | 4      | 2.76  | 2.53  | 2.01  |
| GAIF01019363.1 | 9.98   | 10.18  | 14.51  | 5.27  | 3.75  | 3.13  |
| GAIF01019365.1 | 0      | 0      | 0      | 0.22  | 1.24  | 0.1   |
| GAIF01019366.1 | 0      | 0      | 0.06   | 0     | 0     | 0     |
| GAIF01019369.1 | 2.09   | 0      | 0      | 2.65  | 8.13  | 0     |
| GAIF01019370.1 | 0.04   | 0      | 0      | 0.2   | 0.18  | 0     |
| GAIF01019371.1 | 0      | 0      | 0      | 0.23  | 0.92  | 0     |
| GAIF01019373.1 | 9.99   | 6.24   | 2      | 0.5   | 0.52  | 0     |
| GAIF01019375.1 | 0.24   | 0      | 0      | 0     | 1.85  | 0.26  |
| GAIF01019376.1 | 0      | 0      | 0      | 0     | 0.22  | 0     |
| GAIF01019377.1 | 0.05   | 0      | 0      | 0.12  | 0     | 0     |

|                |         |         |         |         |         |        |
|----------------|---------|---------|---------|---------|---------|--------|
| GAIF01019379.1 | 0       | 0       | 1.88    | 0.59    | 0.4     | 0      |
| GAIF01019380.1 | 0       | 0       | 0       | 0       | 0.08    | 0      |
| GAIF01019383.1 | 41.33   | 30.85   | 55.68   | 53.29   | 33.05   | 60.69  |
| GAIF01019386.1 | 18.11   | 12.87   | 13.99   | 13.15   | 4.74    | 5.02   |
| GAIF01019387.1 | 0.32    | 0.12    | 0       | 0.75    | 0       | 0      |
| GAIF01019388.1 | 0.29    | 0       | 0       | 0       | 1.41    | 0      |
| GAIF01019389.1 | 0.16    | 0.09    | 0.18    | 0.47    | 0.49    | 0.36   |
| GAIF01019390.1 | 0       | 0       | 0       | 0       | 0.36    | 0      |
| GAIF01019391.1 | 0.18    | 0       | 0       | 0.27    | 0       | 0      |
| GAIF01019392.1 | 8.91    | 5.61    | 1.3     | 5.85    | 10.56   | 1.54   |
| GAIF01019393.1 | 0       | 0.24    | 0.19    | 0.2     | 0.47    | 0.13   |
| GAIF01019394.1 | 0       | 0       | 0       | 0       | 0.14    | 0      |
| GAIF01019395.1 | 0.09    | 0       | 0       | 0.05    | 0.27    | 0      |
| GAIF01019396.1 | 0.03    | 0       | 0       | 0.67    | 2.85    | 0.15   |
| GAIF01019398.1 | 0       | 0.11    | 0       | 1.04    | 3.5     | 0.46   |
| GAIF01019400.1 | 3620.82 | 3064.4  | 3392.47 | 2723.6  | 1600.53 | 787.94 |
| GAIF01019401.1 | 1.12    | 0.81    | 0.72    | 3.25    | 7.85    | 2.57   |
| GAIF01019402.1 | 0.08    | 0       | 0       | 0       | 0       | 0      |
| GAIF01019403.1 | 7.89    | 10.48   | 13.09   | 37.62   | 24.32   | 8.55   |
| GAIF01019404.1 | 0       | 0       | 0       | 0.07    | 0.07    | 0      |
| GAIF01019405.1 | 0.22    | 0       | 0       | 0.9     | 2.83    | 0.24   |
| GAIF01019406.1 | 1.2     | 0.1     | 0.16    | 5.07    | 34.49   | 1.74   |
| GAIF01019407.1 | 0       | 0.25    | 0       | 0.24    | 0.6     | 0      |
| GAIF01019408.1 | 0       | 0       | 0       | 0.35    | 1.95    | 0      |
| GAIF01019409.1 | 1434.57 | 1781.02 | 2307.71 | 1047.41 | 441.11  | 347.09 |
| GAIF01019410.1 | 0.37    | 0.34    | 0.46    | 0.17    | 0.2     | 0.07   |
| GAIF01019412.1 | 1.69    | 0       | 0       | 1.96    | 2.03    | 0.62   |
| GAIF01019413.1 | 6.59    | 5.03    | 4.42    | 0       | 12.54   | 0      |
| GAIF01019415.1 | 10.14   | 16.76   | 1.25    | 20.21   | 25.52   | 1.37   |
| GAIF01019416.1 | 26.8    | 16.16   | 7.68    | 64.03   | 49.88   | 9.91   |
| GAIF01019417.1 | 0.1     | 0       | 0       | 0       | 0.13    | 0      |
| GAIF01019418.1 | 0       | 0       | 0       | 4.05    | 0       | 0      |
| GAIF01019420.1 | 3.98    | 0       | 0       | 1.61    | 4.78    | 1.46   |
| GAIF01019421.1 | 0.1     | 0.82    | 0.11    | 52.61   | 39.54   | 22.25  |
| GAIF01019422.1 | 0.15    | 0       | 0       | 0       | 1.11    | 0.17   |
| GAIF01019423.1 | 2.69    | 1.58    | 0.89    | 0.75    | 0.84    | 0.65   |
| GAIF01019424.1 | 6.04    | 9.05    | 2.35    | 39.74   | 62.26   | 8.33   |
| GAIF01019425.1 | 0.11    | 0.28    | 0       | 0.17    | 0.26    | 0.08   |
| GAIF01019426.1 | 0.09    | 0       | 0       | 0.64    | 1.89    | 4.29   |
| GAIF01019427.1 | 0       | 0.03    | 0       | 0.07    | 0       | 0      |
| GAIF01019429.1 | 0.16    | 0.09    | 0.27    | 1.04    | 4.68    | 0.09   |
| GAIF01019430.1 | 159.5   | 209.88  | 297.43  | 228.33  | 220.53  | 145.52 |
| GAIF01019431.1 | 4.34    | 4.11    | 2.63    | 9.96    | 9.68    | 1.98   |
| GAIF01019432.1 | 154.08  | 63.21   | 181.73  | 108.08  | 25.57   | 39.83  |

|                |        |        |       |       |       |        |
|----------------|--------|--------|-------|-------|-------|--------|
| GAIF01019433.1 | 0      | 0.16   | 0     | 0.17  | 0.98  | 0      |
| GAIF01019435.1 | 5.56   | 0.22   | 0     | 7.41  | 32.22 | 2.04   |
| GAIF01019436.1 | 0      | 0      | 0     | 0     | 0.06  | 0      |
| GAIF01019438.1 | 24.63  | 15.57  | 18.09 | 45.34 | 87.02 | 44.89  |
| GAIF01019439.1 | 9.89   | 5.45   | 2.45  | 11.48 | 17.26 | 5.07   |
| GAIF01019441.1 | 0.11   | 0.04   | 0     | 0     | 0     | 0.08   |
| GAIF01019445.1 | 0      | 0      | 0     | 0     | 0.02  | 0      |
| GAIF01019447.1 | 33.55  | 20.78  | 29.14 | 51.17 | 43.51 | 80.35  |
| GAIF01019449.1 | 0      | 3.83   | 9.5   | 0     | 0.71  | 9.05   |
| GAIF01019450.1 | 0.58   | 0.32   | 0.11  | 2.08  | 2.74  | 0.16   |
| GAIF01019451.1 | 16.58  | 16.11  | 22.89 | 16.19 | 21.94 | 9.29   |
| GAIF01019452.1 | 0.02   | 0      | 0     | 0     | 0.01  | 0      |
| GAIF01019454.1 | 0      | 0      | 0.03  | 0.07  | 0.18  | 0      |
| GAIF01019455.1 | 0      | 0      | 0     | 0.11  | 2.49  | 0.54   |
| GAIF01019457.1 | 0.48   | 0.21   | 0     | 0.67  | 1.63  | 0      |
| GAIF01019458.1 | 0.04   | 0      | 0     | 0.05  | 0.35  | 0.41   |
| GAIF01019459.1 | 1.44   | 1.44   | 0.43  | 2.57  | 5.46  | 0.06   |
| GAIF01019460.1 | 0.77   | 0      | 0.57  | 8     | 28.9  | 0      |
| GAIF01019461.1 | 0.35   | 0.14   | 0     | 2.36  | 7.87  | 0.54   |
| GAIF01019463.1 | 0.54   | 0      | 0     | 0.63  | 2.38  | 0      |
| GAIF01019464.1 | 0      | 0      | 0.06  | 0     | 0.03  | 0.03   |
| GAIF01019465.1 | 0      | 0      | 0     | 0     | 0.49  | 7.68   |
| GAIF01019466.1 | 1.19   | 0.78   | 0.37  | 4.31  | 10.02 | 0.35   |
| GAIF01019467.1 | 0.24   | 0      | 0     | 0.14  | 0     | 0      |
| GAIF01019469.1 | 3.1    | 9.53   | 7.29  | 4.66  | 5.94  | 1.49   |
| GAIF01019470.1 | 575.74 | 557.92 | 486.5 | 63.43 | 95.39 | 118.47 |
| GAIF01019471.1 | 0.11   | 0      | 0     | 0.13  | 0.13  | 0      |
| GAIF01019472.1 | 0      | 0      | 0     | 0     | 0     | 0.04   |
| GAIF01019473.1 | 82.33  | 77.06  | 68.1  | 19.08 | 12.27 | 3      |
| GAIF01019474.1 | 0.12   | 0      | 0     | 0     | 0.63  | 0.26   |
| GAIF01019475.1 | 0      | 0      | 0     | 0.3   | 0     | 0      |
| GAIF01019477.1 | 0      | 0      | 0     | 0.21  | 0.46  | 0      |
| GAIF01019478.1 | 1.05   | 2.54   | 0.71  | 1.64  | 1.79  | 0.22   |
| GAIF01019479.1 | 14.87  | 9.67   | 16.35 | 10.87 | 15.03 | 33.38  |
| GAIF01019480.1 | 0.57   | 0      | 0     | 0.13  | 0.55  | 0.25   |
| GAIF01019482.1 | 5.73   | 7.79   | 31.13 | 0.06  | 0.14  | 0.59   |
| GAIF01019484.1 | 7.38   | 3.91   | 15.18 | 4.25  | 7.88  | 49.15  |
| GAIF01019485.1 | 0      | 0      | 0     | 0     | 0.03  | 0      |
| GAIF01019486.1 | 0      | 0      | 0.03  | 0.06  | 0.52  | 0      |
| GAIF01019487.1 | 0      | 0      | 0     | 0.12  | 0     | 0      |
| GAIF01019489.1 | 9.73   | 4.63   | 9.84  | 6.36  | 11.5  | 11.22  |
| GAIF01019490.1 | 14.94  | 12.2   | 11.82 | 72.56 | 67.22 | 25.28  |
| GAIF01019492.1 | 69.93  | 111.38 | 95.97 | 99.33 | 65.36 | 115.33 |
| GAIF01019493.1 | 0      | 0      | 0     | 0     | 0.12  | 0      |

|                |        |         |         |        |       |         |
|----------------|--------|---------|---------|--------|-------|---------|
| GAIF01019494.1 | 1.68   | 0.25    | 0.33    | 2.83   | 10.81 | 1.09    |
| GAIF01019495.1 | 4.32   | 0.76    | 1.07    | 0.63   | 0.05  | 0.43    |
| GAIF01019496.1 | 0.1    | 0.1     | 0       | 0.06   | 0.34  | 0.16    |
| GAIF01019497.1 | 0      | 0.05    | 0.05    | 0      | 0     | 0       |
| GAIF01019498.1 | 0      | 0.09    | 0.38    | 0      | 0     | 0       |
| GAIF01019499.1 | 0.06   | 0.07    | 0       | 0.07   | 0.3   | 0       |
| GAIF01019500.1 | 2.61   | 6.41    | 2.12    | 14.87  | 19.77 | 0.37    |
| GAIF01019501.1 | 3.89   | 6.62    | 1.37    | 7.83   | 6.7   | 0.32    |
| GAIF01019502.1 | 1777.6 | 1951.14 | 3574.11 | 295.42 | 0     | 2202.26 |
| GAIF01019505.1 | 6.52   | 3.7     | 2.12    | 8.23   | 9.98  | 3.4     |
| GAIF01019506.1 | 0.93   | 0.3     | 0       | 2.15   | 9.93  | 0.39    |
| GAIF01019510.1 | 7.1    | 7.02    | 9.21    | 1.62   | 0.39  | 0.95    |
| GAIF01019511.1 | 70.09  | 33.1    | 33.57   | 29.71  | 34.1  | 144.11  |
| GAIF01019512.1 | 0.07   | 0       | 0       | 0.1    | 0.11  | 0       |
| GAIF01019513.1 | 0.98   | 0       | 0.43    | 0.81   | 1.44  | 0.19    |
| GAIF01019515.1 | 0.27   | 0.33    | 0       | 0.37   | 0.25  | 0       |
| GAIF01019518.1 | 0.13   | 0.23    | 0       | 0.5    | 0     | 0       |
| GAIF01019519.1 | 0.04   | 0       | 0       | 0.1    | 1.04  | 0.05    |
| GAIF01019520.1 | 0.86   | 0.49    | 0.3     | 0.97   | 3.55  | 0.81    |
| GAIF01019521.1 | 24.2   | 18.77   | 24.3    | 50.68  | 42.76 | 20      |
| GAIF01019522.1 | 0.13   | 0.14    | 0.14    | 0.53   | 2.52  | 0.14    |
| GAIF01019523.1 | 7.04   | 2.5     | 0.41    | 15.06  | 17.13 | 8.67    |
| GAIF01019524.1 | 56.91  | 62.96   | 81.27   | 96.49  | 53.4  | 38.67   |
| GAIF01019525.1 | 16.16  | 28.12   | 13.87   | 45.92  | 24.16 | 5.89    |
| GAIF01019528.1 | 39.62  | 45.19   | 26.13   | 188.59 | 99.44 | 37.08   |
| GAIF01019529.1 | 2.55   | 0.3     | 0.08    | 10.22  | 36.04 | 1.25    |
| GAIF01019530.1 | 36     | 10.42   | 10.49   | 13.49  | 16.95 | 14.2    |
| GAIF01019535.1 | 0      | 0       | 0       | 0      | 0.12  | 0       |
| GAIF01019536.1 | 0      | 0       | 0       | 0.16   | 0     | 0       |
| GAIF01019537.1 | 0.8    | 0.1     | 0       | 2.16   | 11.73 | 0       |
| GAIF01019538.1 | 0      | 0       | 0       | 0.15   | 0     | 0       |
| GAIF01019539.1 | 0      | 0       | 0       | 3.47   | 2.7   | 2.56    |
| GAIF01019540.1 | 6.19   | 6.57    | 4.86    | 0.31   | 0     | 0       |
| GAIF01019541.1 | 0      | 0       | 0       | 0.12   | 0.21  | 0       |
| GAIF01019544.1 | 0      | 0       | 0       | 0.17   | 0.21  | 0       |
| GAIF01019545.1 | 0.21   | 1.59    | 0.22    | 6.49   | 8.94  | 0       |
| GAIF01019547.1 | 26.71  | 24.12   | 28.14   | 46.67  | 32.92 | 20.79   |
| GAIF01019549.1 | 2.92   | 1.08    | 0.76    | 4.04   | 1.17  | 0.09    |
| GAIF01019550.1 | 0.99   | 0.21    | 0       | 4.12   | 16.97 | 0.22    |
| GAIF01019553.1 | 0.19   | 0       | 0.16    | 0      | 0.87  | 0.73    |
| GAIF01019555.1 | 0.34   | 0.09    | 0.24    | 0.51   | 0.14  | 0.06    |
| GAIF01019556.1 | 0.14   | 0       | 0       | 0.97   | 4.95  | 0       |
| GAIF01019558.1 | 8.51   | 13.44   | 10.86   | 29.05  | 24.32 | 0.94    |
| GAIF01019559.1 | 0.05   | 0       | 0.06    | 0      | 0     | 0       |

|                |         |         |         |         |         |         |
|----------------|---------|---------|---------|---------|---------|---------|
| GAIF01019560.1 | 28.78   | 5.94    | 7.26    | 31.46   | 21.42   | 19.04   |
| GAIF01019561.1 | 0.64    | 0.87    | 0.53    | 0.19    | 0.77    | 0       |
| GAIF01019562.1 | 0.16    | 0       | 0       | 0.38    | 2       | 0       |
| GAIF01019563.1 | 0       | 0       | 0.53    | 1.7     | 0.06    | 1.56    |
| GAIF01019566.1 | 0       | 0.08    | 0       | 0       | 0       | 0       |
| GAIF01019568.1 | 6.59    | 3.75    | 1.45    | 6.66    | 4.55    | 0.5     |
| GAIF01019569.1 | 1486.04 | 1539.71 | 2226.43 | 1542.05 | 1219.42 | 1656.96 |
| GAIF01019571.1 | 0.8     | 0       | 0.09    | 1.97    | 10.72   | 5.3     |
| GAIF01019572.1 | 2.15    | 7.18    | 3.55    | 0       | 0.09    | 0.32    |
| GAIF01019573.1 | 0       | 0       | 0       | 0.04    | 0.04    | 0       |
| GAIF01019574.1 | 0.2     | 0       | 0       | 0.22    | 0       | 0.28    |
| GAIF01019575.1 | 3.31    | 2.52    | 3.33    | 4.87    | 1.67    | 0.82    |
| GAIF01019576.1 | 18.8    | 12.48   | 19.53   | 36.47   | 21.23   | 44.91   |
| GAIF01019577.1 | 0       | 0       | 0       | 0       | 0.04    | 0       |
| GAIF01019578.1 | 5.97    | 15.05   | 4.23    | 12.46   | 10.82   | 1.19    |
| GAIF01019579.1 | 0       | 0       | 0       | 0       | 1.26    | 0       |
| GAIF01019580.1 | 0.44    | 0.1     | 0.09    | 0.36    | 0.25    | 0.13    |
| GAIF01019582.1 | 0.29    | 0       | 0.06    | 1.41    | 0.21    | 0.13    |
| GAIF01019583.1 | 0.41    | 0       | 0.25    | 0       | 0       | 0       |
| GAIF01019585.1 | 1.1     | 0.65    | 0.76    | 0.4     | 0.5     | 0.26    |
| GAIF01019587.1 | 0.5     | 0.2     | 0       | 2.07    | 2.86    | 0.1     |
| GAIF01019591.1 | 0.32    | 0.23    | 0       | 0.35    | 0.45    | 0       |
| GAIF01019593.1 | 0       | 0       | 0       | 0.14    | 3.4     | 0       |
| GAIF01019596.1 | 419.21  | 196.22  | 183.14  | 919.3   | 649.27  | 881.21  |
| GAIF01019598.1 | 103.21  | 123.67  | 66.6    | 178.29  | 95.75   | 25.23   |
| GAIF01019599.1 | 664.01  | 2300.64 | 572.62  | 50.86   | 81.78   | 15.27   |
| GAIF01019600.1 | 39.79   | 50.76   | 40.64   | 9.13    | 9.68    | 6.21    |
| GAIF01019601.1 | 0.55    | 0.55    | 2.18    | 4.08    | 4.94    | 3.18    |
| GAIF01019602.1 | 23.46   | 17.3    | 23.41   | 30.55   | 23.77   | 12.47   |
| GAIF01019603.1 | 0       | 0       | 0       | 0.2     | 0.84    | 0       |
| GAIF01019604.1 | 0.1     | 0.27    | 0.05    | 0.3     | 1.05    | 0       |
| GAIF01019608.1 | 0.36    | 0       | 0       | 0       | 0       | 0       |
| GAIF01019610.1 | 0.41    | 0       | 0       | 0.4     | 0.97    | 0       |
| GAIF01019611.1 | 0       | 0.13    | 0.07    | 0       | 0       | 0.2     |
| GAIF01019612.1 | 0       | 0.04    | 0       | 0       | 0       | 0       |
| GAIF01019613.1 | 0.3     | 0.33    | 0       | 0.52    | 0.9     | 0       |
| GAIF01019614.1 | 18.28   | 20.38   | 18.84   | 10.14   | 11.66   | 19.13   |
| GAIF01019615.1 | 0       | 0       | 0.08    | 0.16    | 0       | 0       |
| GAIF01019616.1 | 0.1     | 0       | 0       | 0       | 0.5     | 0       |
| GAIF01019617.1 | 0.75    | 0.23    | 0.47    | 0.25    | 0       | 0       |
| GAIF01019619.1 | 57.52   | 26.18   | 27.46   | 56.38   | 37.65   | 32.86   |
| GAIF01019620.1 | 0.25    | 0       | 0       | 0       | 0       | 0       |
| GAIF01019621.1 | 0.06    | 0.13    | 0.2     | 0       | 0.36    | 0       |
| GAIF01019622.1 | 29.94   | 37.91   | 29.63   | 75.21   | 78.6    | 25.31   |

|                |         |         |         |         |         |         |
|----------------|---------|---------|---------|---------|---------|---------|
| GAIF01019623.1 | 0.16    | 0       | 0       | 0       | 0       | 0       |
| GAIF01019624.1 | 0       | 0.99    | 0.36    | 0       | 0       | 0.14    |
| GAIF01019626.1 | 0.52    | 0.19    | 0       | 0.74    | 2.39    | 0.06    |
| GAIF01019627.1 | 0.81    | 0.22    | 0.36    | 2.26    | 11.23   | 1.03    |
| GAIF01019628.1 | 0.76    | 0.31    | 0.21    | 1.26    | 0.91    | 0.31    |
| GAIF01019629.1 | 80.3    | 52.41   | 56.22   | 261.88  | 259.08  | 103.84  |
| GAIF01019630.1 | 4.88    | 1.62    | 2.66    | 11.31   | 15.17   | 11.06   |
| GAIF01019631.1 | 0.34    | 0.06    | 0.63    | 0       | 0       | 0       |
| GAIF01019634.1 | 23.99   | 15.76   | 12.85   | 39.5    | 38.33   | 11.83   |
| GAIF01019635.1 | 0       | 0.85    | 0.61    | 0.78    | 1.62    | 0.37    |
| GAIF01019636.1 | 0.11    | 0.06    | 0.06    | 0.34    | 1.74    | 0.15    |
| GAIF01019637.1 | 17.91   | 18.57   | 37.89   | 42.39   | 33.54   | 22.14   |
| GAIF01019640.1 | 1.18    | 0.41    | 0.12    | 1.61    | 3.54    | 0.64    |
| GAIF01019641.1 | 157.94  | 94.49   | 79.03   | 206.87  | 104.47  | 71.95   |
| GAIF01019644.1 | 0       | 0.13    | 0       | 0       | 0       | 0.26    |
| GAIF01019646.1 | 0       | 0       | 0       | 0       | 0.14    | 0       |
| GAIF01019647.1 | 0       | 0.29    | 0       | 0       | 0       | 0       |
| GAIF01019648.1 | 39.69   | 43.29   | 28.01   | 30.44   | 37.5    | 13.28   |
| GAIF01019650.1 | 113.73  | 80.37   | 78.85   | 122.61  | 48.59   | 26.06   |
| GAIF01019651.1 | 0.22    | 0.56    | 0.24    | 0.2     | 0.62    | 0.09    |
| GAIF01019653.1 | 0       | 6.3     | 15.79   | 0.4     | 0       | 11.84   |
| GAIF01019654.1 | 0       | 0       | 0       | 33.85   | 0       | 0       |
| GAIF01019656.1 | 719.42  | 321.62  | 220.1   | 1111.88 | 1515.4  | 4374.09 |
| GAIF01019657.1 | 0.05    | 0.05    | 0       | 0.05    | 0.05    | 0.09    |
| GAIF01019658.1 | 37.7    | 58.78   | 34.43   | 46.04   | 35.15   | 5.31    |
| GAIF01019659.1 | 0       | 0.32    | 0.15    | 0       | 0.04    | 0.04    |
| GAIF01019660.1 | 0.35    | 0.28    | 0       | 1.62    | 7.12    | 0.1     |
| GAIF01019662.1 | 0       | 0.18    | 0.09    | 0       | 0       | 0       |
| GAIF01019663.1 | 1.12    | 1.56    | 1.05    | 7.41    | 11.71   | 3.34    |
| GAIF01019664.1 | 316.16  | 267.92  | 241.1   | 132.94  | 106.67  | 60.8    |
| GAIF01019667.1 | 21.89   | 12.11   | 7.17    | 17.61   | 21.83   | 38.69   |
| GAIF01019669.1 | 4.56    | 4.25    | 1.23    | 1.35    | 1.68    | 0.05    |
| GAIF01019674.1 | 0       | 0       | 0       | 0.32    | 0       | 0       |
| GAIF01019675.1 | 29.39   | 16.53   | 10.23   | 33.32   | 20.88   | 5.8     |
| GAIF01019676.1 | 0       | 0.15    | 0.3     | 3.79    | 11.24   | 0       |
| GAIF01019677.1 | 0       | 14.93   | 22.75   | 0       | 0       | 2.36    |
| GAIF01019678.1 | 0.1     | 0.32    | 0.21    | 0.11    | 0.94    | 0       |
| GAIF01019679.1 | 0.22    | 0       | 0.12    | 0.07    | 0.14    | 0.14    |
| GAIF01019680.1 | 9.25    | 7.79    | 7.79    | 30.16   | 24.85   | 18.51   |
| GAIF01019682.1 | 0       | 0       | 0.01    | 0.03    | 0.17    | 0       |
| GAIF01019684.1 | 2045.5  | 589.25  | 700.52  | 28.57   | 15.07   | 26.39   |
| GAIF01019685.1 | 18.41   | 32.08   | 39.6    | 62.26   | 41.22   | 19.74   |
| GAIF01019687.1 | 32.22   | 56.58   | 41.45   | 43.87   | 38.06   | 10.1    |
| GAIF01019688.1 | 5577.53 | 3262.56 | 1802.12 | 2685.02 | 2097.63 | 2097.37 |



|                |         |         |         |        |        |        |
|----------------|---------|---------|---------|--------|--------|--------|
| GAIF01019689.1 | 0.13    | 0       | 0       | 0      | 0.15   | 0      |
| GAIF01019690.1 | 0.09    | 0.1     | 0       | 0      | 0      | 0      |
| GAIF01019691.1 | 0       | 0       | 0       | 0      | 0      | 0.14   |
| GAIF01019693.1 | 0.21    | 0.96    | 0.68    | 0      | 2      | 0.57   |
| GAIF01019694.1 | 0.21    | 0.15    | 0       | 0      | 0      | 0      |
| GAIF01019696.1 | 17.66   | 14.96   | 20.34   | 28.69  | 40.95  | 11.67  |
| GAIF01019697.1 | 0       | 0.14    | 0.14    | 0      | 0      | 0.14   |
| GAIF01019698.1 | 2.06    | 0.31    | 0.03    | 9.8    | 52.63  | 1.15   |
| GAIF01019700.1 | 1.59    | 1.87    | 4.25    | 4.8    | 8.76   | 11.63  |
| GAIF01019701.1 | 21.27   | 34.37   | 41.88   | 52.2   | 28.9   | 13.34  |
| GAIF01019702.1 | 1.51    | 2.51    | 2.14    | 3.6    | 2.12   | 0.54   |
| GAIF01019704.1 | 16.71   | 0       | 0.18    | 14.94  | 2.67   | 10.04  |
| GAIF01019705.1 | 0.09    | 0       | 0       | 0.37   | 2.85   | 0      |
| GAIF01019706.1 | 0       | 0       | 0       | 0      | 0.7    | 0      |
| GAIF01019707.1 | 0       | 0       | 0       | 0      | 0.01   | 0      |
| GAIF01019708.1 | 0.27    | 0       | 0.24    | 0.03   | 0      | 0      |
| GAIF01019709.1 | 0       | 0.19    | 0.08    | 0.02   | 0      | 0      |
| GAIF01019711.1 | 0.08    | 0       | 0.17    | 0      | 0      | 0      |
| GAIF01019712.1 | 21.54   | 21.26   | 31.88   | 17.26  | 6.35   | 6.6    |
| GAIF01019713.1 | 16.56   | 8.36    | 14.13   | 9.4    | 14.07  | 46.09  |
| GAIF01019715.1 | 45.89   | 18.95   | 18.04   | 4.1    | 4.24   | 0.97   |
| GAIF01019716.1 | 0       | 0       | 0       | 0.23   | 0.35   | 0      |
| GAIF01019718.1 | 0.14    | 0.39    | 0.21    | 0.62   | 0      | 0.77   |
| GAIF01019720.1 | 1442.57 | 1311.24 | 2851.81 | 561.58 | 279.8  | 693.31 |
| GAIF01019721.1 | 0       | 0       | 0       | 0      | 1.17   | 0.27   |
| GAIF01019723.1 | 0.09    | 0.2     | 0.15    | 0.6    | 3.21   | 0.05   |
| GAIF01019724.1 | 2.23    | 0.45    | 0       | 6.96   | 26.49  | 3.15   |
| GAIF01019725.1 | 26.89   | 47.44   | 25.69   | 58.49  | 51.85  | 17.22  |
| GAIF01019726.1 | 31.77   | 30.54   | 37.45   | 39.59  | 22.25  | 14     |
| GAIF01019727.1 | 0       | 0       | 0       | 0.52   | 1.76   | 0      |
| GAIF01019730.1 | 10.65   | 12.19   | 11.86   | 9.68   | 10.12  | 1.52   |
| GAIF01019732.1 | 32.88   | 35.93   | 12.66   | 47.09  | 234.63 | 52.04  |
| GAIF01019735.1 | 0       | 2.72    | 1.93    | 0.79   | 0.25   | 0      |
| GAIF01019736.1 | 5.15    | 2.11    | 1.65    | 18.7   | 2.25   | 3.45   |
| GAIF01019737.1 | 0       | 0       | 0       | 0.01   | 0.02   | 0.02   |
| GAIF01019738.1 | 4.67    | 2.35    | 1.82    | 24.65  | 14.83  | 4.89   |
| GAIF01019740.1 | 0.25    | 0       | 0.14    | 0.22   | 0.08   | 0      |
| GAIF01019741.1 | 0       | 0       | 0       | 0      | 0.58   | 0      |
| GAIF01019742.1 | 87.74   | 98.52   | 95.63   | 93.06  | 155.04 | 40.37  |
| GAIF01019743.1 | 7.27    | 7.51    | 5.65    | 18.61  | 14.96  | 5.24   |
| GAIF01019745.1 | 0       | 0.32    | 0.43    | 0      | 0      | 0.43   |
| GAIF01019746.1 | 0       | 0.05    | 0       | 0      | 0      | 0      |
| GAIF01019748.1 | 0.52    | 0.9     | 0.91    | 1.83   | 5.41   | 0.25   |
| GAIF01019749.1 | 1.31    | 1.05    | 1.36    | 0.32   | 0.17   | 0.11   |

|                |        |        |       |       |       |        |
|----------------|--------|--------|-------|-------|-------|--------|
| GAIF01019750.1 | 4.67   | 6.23   | 5.62  | 25.24 | 19.11 | 2.87   |
| GAIF01019751.1 | 0      | 0      | 0     | 0.25  | 0.48  | 0      |
| GAIF01019753.1 | 0      | 0      | 0     | 0.28  | 1.29  | 0.13   |
| GAIF01019754.1 | 34     | 17.23  | 23.12 | 33.73 | 13.31 | 5.98   |
| GAIF01019755.1 | 53.44  | 33     | 37.33 | 48.59 | 15.34 | 51.11  |
| GAIF01019756.1 | 0.06   | 0.07   | 0.13  | 0.14  | 0.07  | 0.2    |
| GAIF01019757.1 | 57.56  | 30.91  | 56.86 | 38.09 | 26.78 | 152.95 |
| GAIF01019758.1 | 4.01   | 3.86   | 0.25  | 3.69  | 10.55 | 0.25   |
| GAIF01019760.1 | 0      | 0.11   | 0     | 0     | 0.47  | 0      |
| GAIF01019761.1 | 29.52  | 56.68  | 37.17 | 28.67 | 22.93 | 4.36   |
| GAIF01019763.1 | 0      | 0.21   | 0     | 0.11  | 0.83  | 0.22   |
| GAIF01019764.1 | 0.58   | 4.74   | 0     | 1.9   | 3.93  | 0.37   |
| GAIF01019765.1 | 0      | 0      | 0     | 0.06  | 0.12  | 0      |
| GAIF01019767.1 | 0      | 0      | 0     | 0     | 0.3   | 0      |
| GAIF01019768.1 | 26.15  | 24.78  | 16.73 | 20.64 | 21.83 | 18.84  |
| GAIF01019769.1 | 0      | 0      | 0.16  | 0.27  | 0.19  | 0      |
| GAIF01019770.1 | 0      | 0      | 0     | 0.27  | 0     | 0.78   |
| GAIF01019771.1 | 19.08  | 26.66  | 12.23 | 40.58 | 33.84 | 2.61   |
| GAIF01019772.1 | 94.74  | 48.24  | 58.64 | 63.57 | 64.61 | 22.52  |
| GAIF01019773.1 | 0      | 0.54   | 0     | 0.07  | 0     | 0      |
| GAIF01019775.1 | 0.41   | 0.44   | 0     | 1.69  | 2.77  | 0      |
| GAIF01019776.1 | 0.34   | 0.37   | 0     | 0     | 2.02  | 0.19   |
| GAIF01019779.1 | 25.06  | 24.75  | 14.74 | 57.14 | 40.81 | 6.31   |
| GAIF01019781.1 | 360.77 | 166.13 | 88.51 | 64.54 | 8.26  | 75.51  |
| GAIF01019782.1 | 0      | 0      | 0     | 0     | 0.05  | 0      |
| GAIF01019783.1 | 0      | 0      | 0     | 0     | 0.12  | 0      |
| GAIF01019784.1 | 10.43  | 14.67  | 15.49 | 9.97  | 15.49 | 20.96  |
| GAIF01019785.1 | 3.56   | 2.06   | 0.11  | 2.13  | 5.35  | 2.25   |
| GAIF01019787.1 | 6.83   | 5.93   | 4.87  | 11.05 | 6.99  | 4.16   |
| GAIF01019788.1 | 0.24   | 0      | 0     | 0.28  | 0     | 0      |
| GAIF01019789.1 | 88.76  | 43.87  | 66.44 | 56.19 | 62.87 | 35.57  |
| GAIF01019791.1 | 0.14   | 0.3    | 0     | 0.56  | 0.91  | 0      |
| GAIF01019793.1 | 0      | 0.06   | 0     | 0.14  | 0.86  | 0      |
| GAIF01019794.1 | 0.09   | 0      | 0     | 0     | 0.1   | 0.1    |
| GAIF01019795.1 | 2.91   | 6.26   | 4.76  | 1.47  | 0.44  | 0.94   |
| GAIF01019796.1 | 0.36   | 0.56   | 0.08  | 2.97  | 6.58  | 0.24   |
| GAIF01019797.1 | 0.12   | 0      | 0     | 0.16  | 0.37  | 0      |
| GAIF01019798.1 | 0.04   | 0      | 0     | 0.04  | 0.15  | 0      |
| GAIF01019799.1 | 3.64   | 1.88   | 2.84  | 4.51  | 16.91 | 4.15   |
| GAIF01019800.1 | 0.35   | 0.26   | 0.19  | 0.68  | 2.48  | 0.19   |
| GAIF01019803.1 | 0      | 0      | 0     | 0     | 0.14  | 0      |
| GAIF01019804.1 | 0      | 0      | 0.09  | 0     | 0     | 0      |
| GAIF01019805.1 | 0      | 0      | 0     | 0.91  | 1.82  | 3.14   |
| GAIF01019806.1 | 5.36   | 10.9   | 6.53  | 10.95 | 8.44  | 0.95   |

|                |        |        |        |        |        |        |
|----------------|--------|--------|--------|--------|--------|--------|
| GAIF01019809.1 | 2.54   | 3.95   | 2.72   | 0.56   | 1.25   | 0.28   |
| GAIF01019810.1 | 0.25   | 0.11   | 0.22   | 0.23   | 0.42   | 1.63   |
| GAIF01019812.1 | 60.49  | 23.37  | 26.22  | 100.83 | 110.08 | 304.37 |
| GAIF01019813.1 | 61.73  | 33.01  | 27.55  | 125.95 | 169.61 | 94.3   |
| GAIF01019814.1 | 1.23   | 0      | 0.24   | 0      | 0      | 0      |
| GAIF01019816.1 | 0.25   | 0.05   | 0.11   | 0.88   | 1.88   | 0      |
| GAIF01019818.1 | 3.82   | 0.59   | 0.6    | 0      | 0.92   | 0.36   |
| GAIF01019819.1 | 0      | 0      | 0      | 0.08   | 0.32   | 0      |
| GAIF01019820.1 | 0      | 0      | 0      | 0.43   | 0.3    | 0      |
| GAIF01019821.1 | 0      | 0.08   | 0      | 0.68   | 4.93   | 0      |
| GAIF01019822.1 | 40.03  | 64.58  | 73.88  | 124.02 | 85.2   | 28.24  |
| GAIF01019823.1 | 0.09   | 0      | 0      | 0.79   | 0.31   | 0      |
| GAIF01019825.1 | 0.17   | 0      | 0      | 0      | 0      | 0      |
| GAIF01019826.1 | 0.1    | 0      | 0      | 0      | 0      | 0      |
| GAIF01019828.1 | 0.29   | 0.23   | 0.5    | 1.79   | 4.76   | 0.05   |
| GAIF01019829.1 | 0.04   | 0.04   | 0      | 0      | 0      | 0      |
| GAIF01019831.1 | 0.11   | 0.15   | 0      | 0.04   | 0      | 0.04   |
| GAIF01019832.1 | 10.41  | 9.28   | 4.9    | 50.42  | 44.5   | 2.06   |
| GAIF01019833.1 | 0      | 0.57   | 0.01   | 2.38   | 0      | 0      |
| GAIF01019834.1 | 1.67   | 1.35   | 2.8    | 1.32   | 0.95   | 1.83   |
| GAIF01019835.1 | 73.54  | 69.2   | 83.07  | 95.36  | 74.39  | 71.97  |
| GAIF01019837.1 | 0      | 0      | 0      | 0.04   | 0.04   | 0      |
| GAIF01019840.1 | 0.58   | 1.49   | 3.8    | 0.2    | 0.44   | 0.44   |
| GAIF01019843.1 | 113.44 | 144.8  | 79.15  | 104.75 | 108.68 | 32.45  |
| GAIF01019844.1 | 5      | 1.99   | 2.2    | 0.39   | 0.2    | 0.18   |
| GAIF01019847.1 | 0.03   | 0.05   | 0.17   | 0.05   | 0.16   | 0.01   |
| GAIF01019850.1 | 0.37   | 0      | 0.04   | 0.75   | 4.57   | 0.2    |
| GAIF01019852.1 | 207.44 | 157.52 | 355.89 | 60.88  | 47.28  | 217.19 |
| GAIF01019853.1 | 0.09   | 0.03   | 0.05   | 1.14   | 7.12   | 0.05   |
| GAIF01019854.1 | 0      | 0      | 0      | 0      | 0.48   | 0      |
| GAIF01019856.1 | 0.02   | 0      | 0      | 0.08   | 0      | 0      |
| GAIF01019857.1 | 0.12   | 0      | 0      | 0.08   | 0.4    | 0.27   |
| GAIF01019858.1 | 0      | 0.06   | 0      | 0.14   | 1.29   | 2.29   |
| GAIF01019859.1 | 18.92  | 16.95  | 15.5   | 18.14  | 9.24   | 4.95   |
| GAIF01019860.1 | 0      | 0      | 0.13   | 0      | 0      | 0      |
| GAIF01019862.1 | 0.14   | 0      | 0      | 0.51   | 1.39   | 0.15   |
| GAIF01019863.1 | 0.27   | 0      | 0      | 0.8    | 9.07   | 0.15   |
| GAIF01019865.1 | 15.85  | 20.83  | 12.99  | 19.4   | 20.3   | 2.75   |
| GAIF01019866.1 | 22.83  | 15.33  | 14.92  | 63.02  | 21.51  | 14.66  |
| GAIF01019867.1 | 0      | 0      | 0      | 0.23   | 0      | 0      |
| GAIF01019868.1 | 0      | 0      | 0      | 0.02   | 0      | 0      |
| GAIF01019870.1 | 0.32   | 0.34   | 0      | 0.12   | 0.37   | 0      |
| GAIF01019871.1 | 10.89  | 16.06  | 18.51  | 49.53  | 21.35  | 10.36  |
| GAIF01019872.1 | 35.88  | 14.78  | 12.35  | 26.98  | 30.96  | 37.63  |

|                |        |        |        |         |        |         |
|----------------|--------|--------|--------|---------|--------|---------|
| GAIF01019874.1 | 6      | 5.03   | 4.41   | 5.54    | 4.6    | 2.97    |
| GAIF01019876.1 | 0.07   | 0      | 0      | 0       | 0.09   | 0.16    |
| GAIF01019880.1 | 0      | 0      | 0      | 0.06    | 0      | 0       |
| GAIF01019882.1 | 0.28   | 0.13   | 0.16   | 0.12    | 0.09   | 0       |
| GAIF01019883.1 | 0.23   | 0      | 0      | 0       | 0      | 0       |
| GAIF01019885.1 | 85.15  | 64.96  | 20.58  | 242.22  | 271.95 | 75.43   |
| GAIF01019886.1 | 10.87  | 14.2   | 10.47  | 18.97   | 15.49  | 5.3     |
| GAIF01019887.1 | 0      | 0      | 0      | 0       | 0.81   | 0       |
| GAIF01019888.1 | 1.31   | 1.56   | 0.28   | 1.1     | 3.98   | 0.97    |
| GAIF01019889.1 | 0.83   | 0.07   | 0.32   | 0.9     | 11.7   | 1.45    |
| GAIF01019890.1 | 0      | 0      | 0.13   | 0.13    | 0.97   | 0       |
| GAIF01019891.1 | 0      | 0      | 0      | 0.12    | 0      | 0       |
| GAIF01019892.1 | 0.29   | 0      | 0      | 0       | 0      | 0       |
| GAIF01019893.1 | 2.86   | 7.17   | 1.37   | 13      | 33.67  | 0.96    |
| GAIF01019897.1 | 0.13   | 0      | 0      | 0       | 0.31   | 0       |
| GAIF01019898.1 | 2      | 0.57   | 0.35   | 3.78    | 10.23  | 0.58    |
| GAIF01019900.1 | 0      | 0      | 0.14   | 0.15    | 0      | 0       |
| GAIF01019901.1 | 0      | 0.11   | 0      | 0.46    | 0.39   | 0       |
| GAIF01019903.1 | 0      | 0      | 0      | 0       | 0.38   | 0       |
| GAIF01019904.1 | 2.75   | 1      | 0.09   | 4.83    | 13.73  | 7.07    |
| GAIF01019905.1 | 0.14   | 0      | 0      | 0.34    | 0.71   | 0       |
| GAIF01019909.1 | 0.24   | 0.48   | 0.08   | 0.12    | 0.21   | 0       |
| GAIF01019911.1 | 0      | 0      | 0      | 0.14    | 0      | 0       |
| GAIF01019912.1 | 0.81   | 0.24   | 0.49   | 2.15    | 4.49   | 0.24    |
| GAIF01019913.1 | 18.86  | 11.5   | 29.52  | 31.36   | 11.5   | 30.2    |
| GAIF01019915.1 | 7.36   | 5.43   | 9.64   | 27.97   | 27.72  | 8.23    |
| GAIF01019916.1 | 581.21 | 358.82 | 804.16 | 1314.85 | 671.44 | 1148.56 |
| GAIF01019917.1 | 0      | 0.15   | 0      | 0.23    | 0.48   | 0       |
| GAIF01019919.1 | 1.27   | 0.43   | 0      | 1.59    | 4.11   | 0.11    |
| GAIF01019920.1 | 12.18  | 6.7    | 9.41   | 24.88   | 32.31  | 17.11   |
| GAIF01019922.1 | 7.85   | 5.23   | 3.65   | 19.27   | 24.87  | 12.87   |
| GAIF01019923.1 | 0      | 0      | 0.2    | 0       | 0      | 0       |
| GAIF01019924.1 | 0      | 118.62 | 334.64 | 0       | 0      | 0       |
| GAIF01019925.1 | 0      | 0.1    | 0      | 0       | 0.45   | 0.17    |
| GAIF01019926.1 | 9.43   | 6.58   | 11.42  | 24.76   | 31.05  | 53.75   |
| GAIF01019927.1 | 24.32  | 1.72   | 0.7    | 42.43   | 149.39 | 20.35   |
| GAIF01019928.1 | 11.39  | 10.57  | 15.01  | 54.61   | 48.12  | 13.44   |
| GAIF01019929.1 | 0      | 0      | 0      | 0.07    | 0.83   | 0       |
| GAIF01019931.1 | 520.55 | 485.25 | 1093.7 | 261.65  | 188.57 | 709.39  |
| GAIF01019932.1 | 0      | 0      | 0      | 0.45    | 0.83   | 0       |
| GAIF01019935.1 | 0      | 0      | 0.04   | 0       | 0      | 0       |
| GAIF01019937.1 | 0.14   | 0      | 0.16   | 0       | 0      | 0       |
| GAIF01019939.1 | 0      | 0.11   | 0      | 12.74   | 36.36  | 0       |
| GAIF01019942.1 | 0.24   | 0.06   | 0.07   | 0.13    | 0.26   | 0.03    |

|                |        |        |        |        |       |        |
|----------------|--------|--------|--------|--------|-------|--------|
| GAIF01019945.1 | 0      | 0      | 0.06   | 0.07   | 0.35  | 0      |
| GAIF01019947.1 | 10.58  | 25.71  | 12.81  | 21.26  | 22.01 | 2.5    |
| GAIF01019948.1 | 0.8    | 0.11   | 0.11   | 2.56   | 10.14 | 0.44   |
| GAIF01019949.1 | 0.09   | 0.05   | 0.19   | 0      | 0.17  | 2.42   |
| GAIF01019951.1 | 0.72   | 0.26   | 0      | 2.83   | 4.46  | 0.79   |
| GAIF01019952.1 | 0      | 0.18   | 0      | 0.38   | 0.98  | 0      |
| GAIF01019953.1 | 35.22  | 36.28  | 8.31   | 51.17  | 58.65 | 10.5   |
| GAIF01019954.1 | 0      | 0.12   | 0      | 0      | 0     | 0.36   |
| GAIF01019955.1 | 0      | 0      | 0      | 0      | 0.3   | 0      |
| GAIF01019956.1 | 1.74   | 0.43   | 0      | 6.27   | 23.6  | 1.7    |
| GAIF01019957.1 | 0.01   | 0.07   | 0      | 0.15   | 0.04  | 0      |
| GAIF01019958.1 | 0.25   | 0.11   | 0.15   | 0.12   | 0     | 0      |
| GAIF01019959.1 | 0      | 0      | 0.03   | 0      | 0.04  | 0      |
| GAIF01019960.1 | 0.15   | 0.19   | 0.03   | 0.21   | 0.53  | 0      |
| GAIF01019961.1 | 0.01   | 0      | 0      | 0.06   | 0.03  | 0      |
| GAIF01019963.1 | 7.67   | 11.6   | 8.63   | 24.98  | 18.18 | 1.22   |
| GAIF01019966.1 | 4.27   | 2.85   | 2.33   | 18.41  | 61.47 | 0.73   |
| GAIF01019968.1 | 0.1    | 0      | 0      | 0.8    | 1.67  | 0      |
| GAIF01019970.1 | 0      | 0.03   | 0      | 0.12   | 0.06  | 0      |
| GAIF01019971.1 | 0.36   | 0.19   | 0.04   | 0.55   | 1.31  | 0.08   |
| GAIF01019972.1 | 0.01   | 0      | 0.01   | 0.03   | 0.15  | 0.01   |
| GAIF01019973.1 | 0      | 0      | 0      | 0.91   | 6.43  | 0.17   |
| GAIF01019974.1 | 0.16   | 0      | 0      | 0.92   | 4.95  | 0.17   |
| GAIF01019975.1 | 2.39   | 1.77   | 1.89   | 0.67   | 0.23  | 0      |
| GAIF01019976.1 | 5.79   | 5.63   | 1.67   | 19.97  | 18.49 | 0.84   |
| GAIF01019977.1 | 0      | 0.23   | 0      | 0      | 0.31  | 0.32   |
| GAIF01019978.1 | 0      | 0      | 0      | 0      | 0     | 0.1    |
| GAIF01019979.1 | 0      | 0      | 0.06   | 0      | 0     | 0      |
| GAIF01019981.1 | 0      | 0      | 0      | 0      | 0.16  | 0      |
| GAIF01019982.1 | 0.39   | 0.14   | 0      | 0      | 4.83  | 0.14   |
| GAIF01019983.1 | 119.88 | 122.2  | 115.16 | 34.78  | 18.02 | 264.23 |
| GAIF01019984.1 | 1.7    | 0      | 0.21   | 8.83   | 22.98 | 0.54   |
| GAIF01019985.1 | 0      | 0      | 0      | 0.03   | 0     | 0      |
| GAIF01019988.1 | 1.78   | 0.08   | 0.17   | 11.31  | 42.78 | 3.03   |
| GAIF01019989.1 | 55.24  | 49.51  | 14.16  | 65.53  | 46.29 | 1.69   |
| GAIF01019990.1 | 0      | 0.2    | 0      | 0.23   | 0.26  | 0      |
| GAIF01019991.1 | 0.31   | 0      | 0.17   | 1.67   | 5.46  | 0.42   |
| GAIF01019992.1 | 9.47   | 9.75   | 9.84   | 12.42  | 14.43 | 4.62   |
| GAIF01019993.1 | 10.16  | 9.82   | 23.93  | 5.18   | 2.64  | 12.73  |
| GAIF01019995.1 | 0      | 0      | 0      | 0.12   | 0.65  | 0      |
| GAIF01019996.1 | 0.37   | 0.1    | 0      | 0.65   | 5.51  | 0.1    |
| GAIF01019997.1 | 96.45  | 110.61 | 108.21 | 160.79 | 92.03 | 47.11  |
| GAIF01019999.1 | 37.11  | 42.61  | 55.9   | 64.13  | 31.15 | 27.38  |
| GAIF01020000.1 | 13.18  | 10.56  | 13.82  | 29.87  | 34.9  | 33.08  |

|                |        |        |        |       |        |         |
|----------------|--------|--------|--------|-------|--------|---------|
| GAIF01020002.1 | 64.46  | 49.91  | 45.78  | 59.62 | 126.91 | 475.44  |
| GAIF01020003.1 | 0      | 653.44 | 578.93 | 23.04 | 305.77 | 1509.77 |
| GAIF01020004.1 | 0.64   | 0.94   | 0.51   | 7.4   | 5.5    | 0.7     |
| GAIF01020005.1 | 24.28  | 20.55  | 13     | 20.82 | 15.1   | 7.25    |
| GAIF01020006.1 | 1.89   | 4.29   | 2.28   | 11.39 | 9.95   | 0.62    |
| GAIF01020007.1 | 0.02   | 0.03   | 0.05   | 0.02  | 0.08   | 0.02    |
| GAIF01020010.1 | 0      | 0      | 0      | 0     | 0.02   | 0       |
| GAIF01020013.1 | 0      | 0      | 0      | 0.36  | 0.13   | 0       |
| GAIF01020014.1 | 0      | 0.1    | 0      | 0.06  | 0.23   | 0       |
| GAIF01020016.1 | 0.08   | 0      | 0      | 0     | 0      | 0       |
| GAIF01020017.1 | 1.68   | 0      | 0      | 0     | 0      | 0       |
| GAIF01020018.1 | 0.27   | 0.15   | 0.45   | 0.16  | 3.37   | 0.28    |
| GAIF01020019.1 | 0.4    | 0.29   | 0.37   | 1.64  | 5.74   | 0.22    |
| GAIF01020020.1 | 0      | 0      | 0.05   | 0.1   | 0      | 0       |
| GAIF01020022.1 | 0.38   | 0.09   | 0      | 1.61  | 5.9    | 0.59    |
| GAIF01020023.1 | 24.66  | 18.03  | 19.14  | 14.65 | 13.64  | 3.09    |
| GAIF01020025.1 | 71.21  | 35.46  | 18.32  | 13.14 | 11.97  | 10.55   |
| GAIF01020027.1 | 0.21   | 0      | 0      | 0     | 0      | 0       |
| GAIF01020029.1 | 0      | 0      | 0      | 0.08  | 0.44   | 0       |
| GAIF01020030.1 | 0      | 0      | 0      | 0     | 0.49   | 0       |
| GAIF01020032.1 | 0.19   | 0.21   | 0.31   | 0.66  | 0.34   | 0.1     |
| GAIF01020033.1 | 1.38   | 1.11   | 1.35   | 0     | 0      | 0       |
| GAIF01020034.1 | 0      | 0      | 0      | 0     | 0.18   | 0       |
| GAIF01020036.1 | 8.05   | 2.84   | 4.98   | 4.61  | 3      | 5.62    |
| GAIF01020037.1 | 0.19   | 0      | 0.35   | 0.07  | 4.81   | 0       |
| GAIF01020038.1 | 0      | 0.26   | 0      | 0.16  | 0.08   | 0.05    |
| GAIF01020039.1 | 0      | 0      | 0      | 1.25  | 5.33   | 0.34    |
| GAIF01020040.1 | 7.02   | 5.53   | 7.57   | 9.33  | 3.45   | 8.81    |
| GAIF01020041.1 | 0      | 0      | 0.23   | 0     | 0      | 0.06    |
| GAIF01020042.1 | 28.34  | 9.57   | 16.11  | 18.96 | 14.96  | 16.58   |
| GAIF01020043.1 | 0      | 0      | 0      | 0.06  | 0.04   | 0       |
| GAIF01020044.1 | 1.28   | 1.13   | 0.4    | 7.85  | 28.66  | 0.6     |
| GAIF01020045.1 | 70.05  | 38.01  | 24.03  | 4.64  | 4.46   | 3.16    |
| GAIF01020047.1 | 141.64 | 182.9  | 354.05 | 89.9  | 68.16  | 150.93  |
| GAIF01020048.1 | 0      | 0.12   | 0      | 0     | 0      | 0.23    |
| GAIF01020049.1 | 0.47   | 0      | 0.11   | 0     | 0.02   | 0       |
| GAIF01020051.1 | 11.04  | 16.86  | 15.6   | 13.5  | 5.65   | 4.27    |
| GAIF01020052.1 | 8.66   | 9.61   | 1.55   | 95.34 | 149.71 | 3.03    |
| GAIF01020054.1 | 2.07   | 0.73   | 0.1    | 1.75  | 0.74   | 0.87    |
| GAIF01020055.1 | 0      | 0      | 0      | 0.05  | 0      | 0       |
| GAIF01020056.1 | 7.29   | 6.97   | 1.78   | 21.28 | 45.29  | 3.88    |
| GAIF01020057.1 | 0      | 0.02   | 0.44   | 0     | 0      | 0       |
| GAIF01020058.1 | 13.64  | 8.53   | 15.98  | 17.64 | 1.18   | 2.83    |
| GAIF01020059.1 | 0      | 0      | 0      | 0.62  | 3.57   | 0.06    |

|                |         |        |        |         |         |         |
|----------------|---------|--------|--------|---------|---------|---------|
| GAIF01020060.1 | 0       | 0.64   | 0.37   | 0       | 0.2     | 0.37    |
| GAIF01020062.1 | 12.15   | 13.45  | 13.14  | 15.79   | 23.61   | 14.26   |
| GAIF01020063.1 | 0.98    | 0      | 0.1    | 1.14    | 3.32    | 0       |
| GAIF01020065.1 | 1188.83 | 893.42 | 767.73 | 1542.04 | 1639.88 | 1965.24 |
| GAIF01020067.1 | 5.52    | 6.25   | 1.64   | 1.73    | 1.62    | 0       |
| GAIF01020068.1 | 6.39    | 10.11  | 8.25   | 18.86   | 13.76   | 2.42    |
| GAIF01020069.1 | 23.65   | 6.24   | 6.24   | 58.84   | 115.77  | 213.98  |
| GAIF01020070.1 | 1.04    | 0      | 3.07   | 1.93    | 0       | 2.4     |
| GAIF01020071.1 | 0       | 0      | 0      | 0       | 0.05    | 0       |
| GAIF01020073.1 | 0       | 0.1    | 0      | 0       | 0       | 0       |
| GAIF01020075.1 | 0       | 0      | 0.05   | 0.08    | 0.23    | 0       |
| GAIF01020077.1 | 7.53    | 4.5    | 9.32   | 17.22   | 14.32   | 59.77   |
| GAIF01020082.1 | 29.16   | 17.3   | 10.35  | 18.75   | 17.12   | 7.96    |
| GAIF01020083.1 | 0.33    | 0      | 0      | 0       | 0       | 0       |
| GAIF01020084.1 | 10.06   | 0.76   | 0.67   | 33.61   | 140.54  | 42.64   |
| GAIF01020085.1 | 24.23   | 59.27  | 37.82  | 24.11   | 13.02   | 2.97    |
| GAIF01020086.1 | 15.66   | 18.72  | 33.37  | 84      | 40.16   | 24.39   |
| GAIF01020087.1 | 0.27    | 0.76   | 0.64   | 1.14    | 0.71    | 0       |
| GAIF01020088.1 | 0       | 0      | 0      | 0       | 0.09    | 0       |
| GAIF01020090.1 | 4.15    | 2.48   | 5.27   | 3.93    | 1.47    | 5.73    |
| GAIF01020091.1 | 52.34   | 17.69  | 19.49  | 134.24  | 134.36  | 100.88  |
| GAIF01020094.1 | 0       | 0.17   | 0      | 0       | 0       | 0       |
| GAIF01020095.1 | 0       | 0.22   | 1.25   | 0       | 0       | 0       |
| GAIF01020097.1 | 0       | 0      | 0.77   | 0       | 0       | 0.66    |
| GAIF01020098.1 | 307.66  | 269.95 | 107.61 | 150.39  | 70.2    | 61.51   |
| GAIF01020099.1 | 0.05    | 0      | 0      | 0       | 0       | 0.12    |
| GAIF01020100.1 | 3.51    | 0.21   | 0.1    | 1.88    | 8.37    | 4.06    |
| GAIF01020102.1 | 162.5   | 150.98 | 115.21 | 241.78  | 172.39  | 14.46   |
| GAIF01020103.1 | 8.12    | 11.03  | 7.67   | 25.43   | 36.31   | 30.33   |
| GAIF01020104.1 | 17.76   | 12.59  | 14.99  | 22.12   | 15.1    | 33.55   |
| GAIF01020105.1 | 4.95    | 0.83   | 0.66   | 13.32   | 23.54   | 0.78    |
| GAIF01020106.1 | 0       | 0      | 0      | 0       | 1.97    | 0       |
| GAIF01020107.1 | 0       | 0      | 0.01   | 0.69    | 1.2     | 0.09    |
| GAIF01020108.1 | 0       | 0.77   | 0.14   | 2.02    | 0.16    | 0       |
| GAIF01020109.1 | 0.5     | 0.45   | 0.28   | 0.15    | 0.8     | 0.05    |
| GAIF01020110.1 | 0       | 0      | 0      | 0.2     | 0       | 0       |
| GAIF01020111.1 | 0       | 0      | 0      | 0.33    | 2.42    | 0       |
| GAIF01020112.1 | 0.16    | 0      | 0      | 1.89    | 4.71    | 0.18    |
| GAIF01020113.1 | 6.24    | 4.48   | 3.33   | 28.59   | 33.83   | 9.34    |
| GAIF01020114.1 | 0.84    | 0.99   | 1.32   | 0.08    | 0       | 0       |
| GAIF01020115.1 | 0.39    | 0.21   | 0.36   | 2.8     | 1.72    | 0.57    |
| GAIF01020116.1 | 116.68  | 99     | 57.54  | 22.19   | 27.27   | 14.57   |
| GAIF01020118.1 | 0       | 0      | 0      | 0       | 0.12    | 0       |
| GAIF01020119.1 | 0       | 0      | 0.05   | 0       | 0       | 0       |

|                |        |        |        |        |       |       |
|----------------|--------|--------|--------|--------|-------|-------|
| GAIF01020120.1 | 0.12   | 0.5    | 0.38   | 0.4    | 0.3   | 0     |
| GAIF01020121.1 | 5.26   | 4.52   | 2.3    | 15.52  | 9.26  | 1.18  |
| GAIF01020123.1 | 2.83   | 1.35   | 0.91   | 1.09   | 0.93  | 0.58  |
| GAIF01020125.1 | 6.65   | 12.07  | 8.33   | 1.71   | 0.79  | 0.27  |
| GAIF01020126.1 | 10.13  | 22.41  | 23.47  | 26.64  | 11.14 | 8.53  |
| GAIF01020129.1 | 26.54  | 51.64  | 16.85  | 66.72  | 71.04 | 1.28  |
| GAIF01020130.1 | 13.42  | 14.65  | 6.1    | 37     | 59.59 | 1.41  |
| GAIF01020131.1 | 2.24   | 3.94   | 0.82   | 0.25   | 0     | 0     |
| GAIF01020132.1 | 0.37   | 0      | 0      | 0.36   | 0.46  | 0.18  |
| GAIF01020133.1 | 0.12   | 0.13   | 0      | 0      | 0     | 0     |
| GAIF01020134.1 | 13.56  | 9.57   | 14.04  | 16.7   | 8.42  | 6.19  |
| GAIF01020137.1 | 0      | 0.15   | 0.31   | 0.33   | 0.34  | 0     |
| GAIF01020139.1 | 0.06   | 3.63   | 0      | 0      | 0     | 0     |
| GAIF01020140.1 | 11.37  | 6.27   | 5.87   | 28.08  | 28.92 | 5.06  |
| GAIF01020147.1 | 0      | 0      | 0      | 0      | 0.07  | 0     |
| GAIF01020148.1 | 14.29  | 7.52   | 4.16   | 4.33   | 7.78  | 1.64  |
| GAIF01020149.1 | 0.62   | 0      | 0      | 6.26   | 33.82 | 0     |
| GAIF01020151.1 | 91.37  | 140.38 | 185.72 | 24.8   | 21.58 | 102.6 |
| GAIF01020152.1 | 0      | 0      | 0      | 0      | 0.06  | 0     |
| GAIF01020153.1 | 16.75  | 33.32  | 5.38   | 48.84  | 76.65 | 2.59  |
| GAIF01020154.1 | 4.93   | 5.82   | 2.33   | 16.64  | 11.76 | 0.97  |
| GAIF01020155.1 | 8.98   | 5.27   | 3.97   | 10.27  | 14.83 | 3.44  |
| GAIF01020156.1 | 0      | 0      | 0      | 0      | 0.52  | 0     |
| GAIF01020157.1 | 0      | 0      | 0      | 0.12   | 0     | 0.11  |
| GAIF01020159.1 | 3.28   | 7.51   | 6.23   | 14.15  | 6.98  | 2.67  |
| GAIF01020162.1 | 0      | 0      | 0      | 0      | 0.09  | 0     |
| GAIF01020163.1 | 0.22   | 0.15   | 0.1    | 1.5    | 5.16  | 0.3   |
| GAIF01020164.1 | 0      | 0      | 0      | 0      | 0.24  | 0     |
| GAIF01020165.1 | 0.5    | 0      | 0      | 2.61   | 9.62  | 0.28  |
| GAIF01020166.1 | 6.33   | 8.57   | 6.55   | 26.64  | 19.99 | 4.6   |
| GAIF01020167.1 | 2.41   | 2.76   | 2.65   | 0.7    | 0.87  | 1.33  |
| GAIF01020168.1 | 0      | 0      | 0      | 0      | 0.57  | 0     |
| GAIF01020169.1 | 33.75  | 29.03  | 23.45  | 33.73  | 23.94 | 16.19 |
| GAIF01020171.1 | 51.5   | 57.49  | 37.71  | 76.45  | 63.87 | 32.51 |
| GAIF01020172.1 | 0      | 0      | 0.18   | 0      | 0     | 0     |
| GAIF01020175.1 | 4.69   | 0      | 0      | 0.49   | 0.45  | 0     |
| GAIF01020176.1 | 150.74 | 31.43  | 14.41  | 123.84 | 94.58 | 93.38 |
| GAIF01020181.1 | 7.7    | 9.71   | 4.81   | 2.8    | 4.46  | 0     |
| GAIF01020182.1 | 0.07   | 0      | 0      | 0      | 0.89  | 0.08  |
| GAIF01020183.1 | 0.04   | 0.02   | 0.08   | 0.15   | 0.13  | 0     |
| GAIF01020184.1 | 26.74  | 26.84  | 13.51  | 27.1   | 24.32 | 1.82  |
| GAIF01020185.1 | 0.09   | 0.1    | 0      | 0      | 0     | 0     |
| GAIF01020186.1 | 0      | 0      | 0      | 0      | 0     | 0.01  |
| GAIF01020187.1 | 0      | 0      | 2.92   | 0      | 1.03  | 0     |



|                |          |         |         |          |        |         |
|----------------|----------|---------|---------|----------|--------|---------|
| GAIF01020188.1 | 0.74     | 0.66    | 0.36    | 0.23     | 0.21   | 0.14    |
| GAIF01020189.1 | 0        | 0       | 0.03    | 0        | 0      | 0       |
| GAIF01020190.1 | 0.37     | 0       | 0.17    | 0.31     | 0.9    | 0.21    |
| GAIF01020192.1 | 12.51    | 9.1     | 5.26    | 1        | 0.52   | 0.08    |
| GAIF01020193.1 | 2.01     | 1.48    | 2.1     | 6.49     | 12.6   | 2.27    |
| GAIF01020194.1 | 0.74     | 0.42    | 0.07    | 0.19     | 0.98   | 0.14    |
| GAIF01020196.1 | 16.49    | 7.77    | 0       | 78.48    | 73.72  | 6.12    |
| GAIF01020197.1 | 0.08     | 0       | 0       | 0        | 0.43   | 0       |
| GAIF01020198.1 | 0        | 0       | 0       | 0        | 0.25   | 0       |
| GAIF01020199.1 | 0.56     | 3.2     | 0.78    | 7.93     | 9.89   | 0.3     |
| GAIF01020202.1 | 4.1      | 0.34    | 0.01    | 1.11     | 2.28   | 0       |
| GAIF01020203.1 | 2.49     | 1.4     | 0       | 1.07     | 2.1    | 0       |
| GAIF01020204.1 | 0        | 0.4     | 0       | 0.43     | 1.02   | 0       |
| GAIF01020205.1 | 0.03     | 0.05    | 0.01    | 0.05     | 0.2    | 0.23    |
| GAIF01020206.1 | 0        | 0       | 0.19    | 0.1      | 0.05   | 0.05    |
| GAIF01020207.1 | 0        | 0       | 0.06    | 0        | 1.15   | 0       |
| GAIF01020208.1 | 0        | 0       | 0       | 0.01     | 0      | 0       |
| GAIF01020209.1 | 3.81     | 1.47    | 4.18    | 3.93     | 2.24   | 14      |
| GAIF01020211.1 | 0        | 0       | 24.68   | 0        | 0      | 0       |
| GAIF01020214.1 | 0.92     | 0.3     | 0.1     | 4.36     | 14.1   | 0.81    |
| GAIF01020216.1 | 1.22     | 4.25    | 4.3     | 6.26     | 2.92   | 1.54    |
| GAIF01020217.1 | 0.21     | 0.41    | 0       | 2.03     | 2.91   | 0.09    |
| GAIF01020218.1 | 29.15    | 73.95   | 59.91   | 74.56    | 73.22  | 16.68   |
| GAIF01020220.1 | 0        | 0.07    | 0.36    | 0        | 0      | 1.44    |
| GAIF01020222.1 | 0        | 0       | 0       | 0        | 0.17   | 0.23    |
| GAIF01020223.1 | 13513.03 | 1559.52 | 6479.43 | 13354.89 | 1291.1 | 8389.23 |
| GAIF01020224.1 | 0        | 0       | 0       | 0        | 0.06   | 0       |
| GAIF01020225.1 | 0.07     | 0.24    | 0       | 0.17     | 0.53   | 0       |
| GAIF01020226.1 | 1.87     | 0.84    | 0.05    | 6.02     | 13.24  | 0.37    |
| GAIF01020228.1 | 2955.45  | 2848.21 | 4839.43 | 1278.28  | 623.99 | 1270.89 |
| GAIF01020229.1 | 0        | 0       | 0       | 0        | 0.02   | 0       |
| GAIF01020231.1 | 18.09    | 18.15   | 5.45    | 72.51    | 45.85  | 2.05    |
| GAIF01020232.1 | 0.3      | 0.33    | 0.5     | 2.11     | 0.73   | 0.33    |
| GAIF01020233.1 | 29.16    | 32.71   | 25.73   | 36.73    | 21.36  | 12.94   |
| GAIF01020235.1 | 0.31     | 1.35    | 0.17    | 1.8      | 0.37   | 0       |
| GAIF01020237.1 | 0.72     | 0.67    | 0       | 0.84     | 2.48   | 0.57    |
| GAIF01020239.1 | 6.68     | 2.23    | 2.91    | 10.83    | 5.35   | 33.22   |
| GAIF01020240.1 | 0        | 0       | 0       | 0        | 0.07   | 0       |
| GAIF01020243.1 | 10       | 12.69   | 5.71    | 4.52     | 7.71   | 0.71    |
| GAIF01020245.1 | 127.45   | 98.36   | 96.39   | 167.06   | 69.71  | 230.94  |
| GAIF01020246.1 | 0        | 0       | 21.59   | 0        | 0      | 0       |
| GAIF01020247.1 | 9.78     | 13.43   | 10.48   | 9.82     | 7.11   | 2.62    |
| GAIF01020249.1 | 0        | 0       | 0       | 0.8      | 5.64   | 0       |
| GAIF01020250.1 | 0.11     | 0       | 0       | 0.38     | 0.92   | 0       |

|                |       |       |       |       |       |       |
|----------------|-------|-------|-------|-------|-------|-------|
| GAIF01020251.1 | 2.67  | 1.64  | 2.14  | 3.13  | 2.78  | 5.52  |
| GAIF01020254.1 | 0     | 0     | 0     | 0     | 0.28  | 0     |
| GAIF01020256.1 | 50.12 | 9.04  | 1.45  | 59.43 | 51.05 | 2.52  |
| GAIF01020257.1 | 0     | 0     | 0     | 0     | 0.21  | 0     |
| GAIF01020258.1 | 19.07 | 21.57 | 18.6  | 60.15 | 45.24 | 6.07  |
| GAIF01020259.1 | 65.61 | 14.96 | 47.59 | 74.11 | 41.26 | 19.71 |
| GAIF01020260.1 | 0.09  | 0     | 0.05  | 0.28  | 0.5   | 0     |
| GAIF01020261.1 | 0     | 0     | 0     | 0     | 0     | 0.39  |
| GAIF01020262.1 | 0.06  | 0.06  | 0     | 0     | 1.62  | 0     |
| GAIF01020263.1 | 0.29  | 0     | 0.16  | 0     | 1.04  | 0     |
| GAIF01020264.1 | 0.21  | 0     | 0     | 0     | 0     | 0     |
| GAIF01020265.1 | 0.57  | 0.45  | 0.62  | 0.36  | 0.74  | 0     |
| GAIF01020266.1 | 34.08 | 12.08 | 19.78 | 1.93  | 1     | 0.69  |
| GAIF01020267.1 | 0.18  | 0.1   | 0.1   | 0.1   | 0.32  | 0.1   |
| GAIF01020268.1 | 0.55  | 0     | 0.24  | 0     | 0.13  | 0     |
| GAIF01020270.1 | 0     | 0     | 0     | 0     | 0.17  | 0     |
| GAIF01020271.1 | 0     | 0     | 0     | 0     | 0.09  | 0     |
| GAIF01020272.1 | 10.71 | 11.37 | 21.51 | 32.28 | 24.61 | 12.21 |
| GAIF01020273.1 | 1.96  | 0.1   | 0     | 7.87  | 14.39 | 7.08  |
| GAIF01020274.1 | 0     | 0.13  | 0     | 0.14  | 1.28  | 0     |
| GAIF01020275.1 | 0.03  | 0     | 0     | 0.03  | 1.18  | 0.19  |
| GAIF01020276.1 | 1.43  | 0.32  | 0.56  | 1.99  | 3.53  | 1.69  |
| GAIF01020277.1 | 1.01  | 0.61  | 0.22  | 8.93  | 22.58 | 0.93  |
| GAIF01020279.1 | 0.51  | 0.44  | 0.11  | 0.35  | 1.09  | 0     |
| GAIF01020281.1 | 0     | 0.22  | 0     | 0     | 0     | 0     |
| GAIF01020284.1 | 30.38 | 30.1  | 17.91 | 69.1  | 65.18 | 15.42 |
| GAIF01020285.1 | 0.63  | 0     | 0.22  | 3.62  | 8.78  | 0.9   |
| GAIF01020286.1 | 0     | 0     | 0     | 0.11  | 0.17  | 0     |
| GAIF01020287.1 | 28.79 | 51.56 | 3.76  | 12.06 | 56.95 | 7     |
| GAIF01020288.1 | 11.98 | 11.57 | 12.06 | 26.54 | 16.19 | 6.93  |
| GAIF01020289.1 | 3.22  | 2.08  | 1.84  | 10.26 | 11.04 | 3.62  |
| GAIF01020291.1 | 0.31  | 0.17  | 0.37  | 0     | 0     | 0     |
| GAIF01020293.1 | 0     | 0     | 0     | 0     | 0.18  | 0     |
| GAIF01020294.1 | 0     | 0     | 0     | 0     | 0.16  | 0     |
| GAIF01020296.1 | 0     | 0     | 0.11  | 0     | 0     | 0.94  |
| GAIF01020297.1 | 0.06  | 0.62  | 0.61  | 0.66  | 0.61  | 0.18  |
| GAIF01020299.1 | 0     | 0     | 0     | 0.09  | 0     | 0     |
| GAIF01020300.1 | 0.05  | 0.09  | 0     | 0.8   | 7.82  | 0     |
| GAIF01020301.1 | 0.09  | 0     | 0     | 1.91  | 17.65 | 0.05  |
| GAIF01020302.1 | 0.4   | 1.05  | 0.53  | 0.47  | 0.39  | 0     |
| GAIF01020303.1 | 0.17  | 0.09  | 0     | 0     | 0.3   | 0     |
| GAIF01020307.1 | 0     | 0     | 0     | 0     | 0.08  | 0     |
| GAIF01020308.1 | 0.16  | 0.52  | 0     | 1.84  | 1.9   | 0.17  |
| GAIF01020309.1 | 0     | 0     | 0     | 0.25  | 1.02  | 0     |

|                |       |       |       |        |        |        |
|----------------|-------|-------|-------|--------|--------|--------|
| GAIF01020311.1 | 0     | 0     | 0     | 0.26   | 0.18   | 0      |
| GAIF01020312.1 | 0.01  | 0     | 0     | 0.06   | 0.08   | 0      |
| GAIF01020314.1 | 0.44  | 0.48  | 0.42  | 0.74   | 2.36   | 0      |
| GAIF01020315.1 | 0.4   | 0.07  | 0     | 0.77   | 1.68   | 0.22   |
| GAIF01020318.1 | 1.92  | 1.13  | 0.16  | 7.21   | 20.28  | 0.16   |
| GAIF01020320.1 | 2.84  | 2.22  | 3.41  | 7.32   | 5.34   | 3.13   |
| GAIF01020322.1 | 5.13  | 0     | 0     | 0.85   | 0      | 1.78   |
| GAIF01020323.1 | 1.69  | 2.78  | 1.79  | 9.45   | 12.31  | 0.26   |
| GAIF01020324.1 | 0     | 5.03  | 0     | 0      | 1.51   | 0      |
| GAIF01020326.1 | 5.82  | 13.66 | 4.07  | 23.03  | 34.04  | 0.58   |
| GAIF01020330.1 | 25.5  | 33.72 | 12.89 | 95.3   | 73.03  | 4.42   |
| GAIF01020331.1 | 1.35  | 1.14  | 0.54  | 6.35   | 13.84  | 0.34   |
| GAIF01020332.1 | 7.81  | 8.5   | 5.5   | 35.12  | 74.82  | 12.7   |
| GAIF01020333.1 | 51.76 | 41.46 | 39.19 | 215.51 | 248.01 | 28.91  |
| GAIF01020336.1 | 0.04  | 0     | 0.06  | 0      | 0      | 0.03   |
| GAIF01020339.1 | 0.26  | 0.07  | 0     | 1.18   | 5.92   | 1.19   |
| GAIF01020340.1 | 0     | 0     | 0     | 0.11   | 0.55   | 0      |
| GAIF01020341.1 | 1.83  | 1.77  | 2.27  | 4.62   | 9.27   | 1.45   |
| GAIF01020343.1 | 0     | 0     | 0     | 0      | 0.09   | 0      |
| GAIF01020346.1 | 0     | 0     | 0     | 0      | 0.44   | 0      |
| GAIF01020348.1 | 14.63 | 4.74  | 2.42  | 20.13  | 18.39  | 16.82  |
| GAIF01020349.1 | 17.48 | 0     | 0     | 0      | 21.02  | 0      |
| GAIF01020350.1 | 12.17 | 14.25 | 15.9  | 21.59  | 16.82  | 3.62   |
| GAIF01020351.1 | 0.27  | 0.57  | 0     | 0      | 0      | 0      |
| GAIF01020352.1 | 0     | 0     | 0     | 0.05   | 0.05   | 0      |
| GAIF01020355.1 | 33.49 | 21.27 | 36.63 | 97.35  | 165.05 | 104.51 |
| GAIF01020356.1 | 0     | 0     | 0     | 0.23   | 0.67   | 0      |
| GAIF01020360.1 | 1.23  | 1.47  | 1.77  | 2.1    | 2.39   | 0.49   |
| GAIF01020361.1 | 6.15  | 6.01  | 6.29  | 16.3   | 16.22  | 3.03   |
| GAIF01020363.1 | 0     | 0     | 0     | 0      | 0.32   | 0      |
| GAIF01020365.1 | 0     | 0     | 0     | 0      | 0.08   | 0      |
| GAIF01020367.1 | 0.86  | 0.38  | 0     | 8.49   | 16.48  | 0.06   |
| GAIF01020368.1 | 4.42  | 6.31  | 3.64  | 1.07   | 1.44   | 0.41   |
| GAIF01020369.1 | 17.48 | 9.5   | 1.6   | 6.76   | 1.75   | 3.21   |
| GAIF01020370.1 | 3.08  | 1.02  | 0     | 2.11   | 4.62   | 4.57   |
| GAIF01020371.1 | 8.69  | 11    | 9.04  | 19.33  | 11.44  | 3.53   |
| GAIF01020372.1 | 17.61 | 19.75 | 17.75 | 40.88  | 18.25  | 5.49   |
| GAIF01020373.1 | 5.25  | 23.99 | 2.5   | 15.65  | 39.17  | 0.39   |
| GAIF01020374.1 | 0     | 0     | 0     | 1.07   | 2.78   | 0      |
| GAIF01020375.1 | 1.69  | 0     | 0     | 6.05   | 36.4   | 1.24   |
| GAIF01020376.1 | 2.96  | 2.6   | 2.09  | 7.19   | 5.69   | 1.54   |
| GAIF01020377.1 | 0.58  | 0.36  | 0     | 0.29   | 1.72   | 3.57   |
| GAIF01020378.1 | 0     | 0     | 0     | 0      | 0.04   | 0      |
| GAIF01020379.1 | 0     | 0     | 0     | 1.64   | 1.06   | 0      |

|                |       |        |       |       |        |       |
|----------------|-------|--------|-------|-------|--------|-------|
| GAIF01020380.1 | 0.04  | 0      | 0     | 0     | 0      | 0     |
| GAIF01020381.1 | 0     | 0      | 0     | 0     | 0.39   | 0     |
| GAIF01020382.1 | 67.75 | 34.19  | 30.12 | 41.75 | 14.11  | 5.81  |
| GAIF01020383.1 | 10.24 | 8.05   | 4.38  | 40.51 | 72.1   | 1.99  |
| GAIF01020385.1 | 23.18 | 34.61  | 57.63 | 16.65 | 13.34  | 11.07 |
| GAIF01020386.1 | 1.02  | 0      | 0     | 2.27  | 6.05   | 18.31 |
| GAIF01020387.1 | 0     | 0      | 0     | 0.08  | 0      | 0     |
| GAIF01020390.1 | 0.25  | 0.04   | 0.2   | 0.45  | 0.29   | 0     |
| GAIF01020391.1 | 0.62  | 0.89   | 1.18  | 0.6   | 0.25   | 0.62  |
| GAIF01020392.1 | 31.14 | 16.8   | 9.45  | 11.27 | 2.82   | 1.32  |
| GAIF01020394.1 | 0     | 0      | 0     | 0.53  | 0.31   | 0     |
| GAIF01020396.1 | 0     | 0.12   | 0.03  | 0.1   | 0.23   | 0     |
| GAIF01020397.1 | 0     | 0      | 0     | 0.09  | 0.21   | 0     |
| GAIF01020399.1 | 14.74 | 9.87   | 4.86  | 22.38 | 15.07  | 4.48  |
| GAIF01020400.1 | 0     | 0      | 0     | 4.49  | 0      | 0.8   |
| GAIF01020401.1 | 0     | 0.11   | 0     | 8.82  | 3.83   | 0.21  |
| GAIF01020403.1 | 0     | 0.08   | 0     | 0     | 2.38   | 0     |
| GAIF01020404.1 | 0     | 0.01   | 0     | 0     | 0      | 0     |
| GAIF01020405.1 | 0.31  | 0.51   | 0     | 7.12  | 17.97  | 0     |
| GAIF01020406.1 | 48.02 | 28.31  | 11.37 | 13.02 | 27.9   | 2.92  |
| GAIF01020407.1 | 0.13  | 0      | 0     | 0     | 0.48   | 0.29  |
| GAIF01020408.1 | 1.4   | 0.72   | 0.08  | 2.74  | 2.53   | 0.11  |
| GAIF01020411.1 | 0.87  | 1.37   | 2.19  | 1.61  | 6.25   | 0.29  |
| GAIF01020412.1 | 0.08  | 0      | 0.17  | 0     | 0      | 0.08  |
| GAIF01020413.1 | 59.93 | 116.44 | 77.39 | 90.33 | 107.04 | 38.4  |
| GAIF01020414.1 | 0     | 0      | 0     | 0     | 0.59   | 0     |
| GAIF01020415.1 | 0     | 0.35   | 0.14  | 0.97  | 5.95   | 1.7   |
| GAIF01020419.1 | 0     | 0.17   | 0     | 1.09  | 2.16   | 1.21  |
| GAIF01020420.1 | 0.05  | 0      | 0.03  | 0.48  | 3.86   | 0.05  |
| GAIF01020421.1 | 0     | 0.42   | 1.07  | 0     | 0      | 1.07  |
| GAIF01020422.1 | 0.53  | 0      | 0     | 0.62  | 4.47   | 0.19  |
| GAIF01020426.1 | 78.61 | 65.58  | 89.7  | 93.08 | 69.25  | 46.59 |
| GAIF01020427.1 | 0.37  | 0      | 0     | 3.43  | 24.11  | 0.14  |
| GAIF01020428.1 | 0.21  | 0.19   | 0     | 0.43  | 0.79   | 0     |
| GAIF01020429.1 | 0     | 0      | 0     | 0     | 0.88   | 0     |
| GAIF01020430.1 | 0.18  | 0.03   | 0     | 0.08  | 0.16   | 0.03  |
| GAIF01020432.1 | 12.67 | 12.95  | 11.17 | 20.59 | 30.79  | 5.18  |
| GAIF01020433.1 | 0     | 0      | 0     | 0     | 0      | 1.63  |
| GAIF01020434.1 | 0     | 0      | 0.11  | 0.12  | 0.36   | 0     |
| GAIF01020435.1 | 0.5   | 0.12   | 0.08  | 2.7   | 15.14  | 1.12  |
| GAIF01020436.1 | 0     | 0.23   | 0.12  | 0     | 0      | 0     |
| GAIF01020437.1 | 0     | 0      | 0     | 0.38  | 0      | 0     |
| GAIF01020438.1 | 0.04  | 0      | 0     | 0.4   | 2.22   | 0.42  |
| GAIF01020439.1 | 0     | 0      | 0     | 0.09  | 0      | 0.25  |

|                |        |        |        |        |        |        |
|----------------|--------|--------|--------|--------|--------|--------|
| GAIF01020440.1 | 0      | 0      | 0      | 0.08   | 0      | 0.06   |
| GAIF01020442.1 | 5.24   | 0.86   | 1.22   | 21.92  | 78.25  | 10.14  |
| GAIF01020446.1 | 11.05  | 7.62   | 8.85   | 31.72  | 4.92   | 9.18   |
| GAIF01020447.1 | 0      | 0      | 0      | 0      | 0.01   | 0      |
| GAIF01020448.1 | 0      | 0.3    | 1.22   | 0      | 0      | 0.1    |
| GAIF01020452.1 | 7.82   | 4.56   | 0      | 17.07  | 32.09  | 6.99   |
| GAIF01020453.1 | 0.21   | 0.12   | 0.12   | 0.03   | 0      | 0      |
| GAIF01020455.1 | 155.81 | 44.68  | 13.29  | 132.05 | 126.91 | 15.28  |
| GAIF01020456.1 | 0      | 0.07   | 0      | 0      | 0      | 0      |
| GAIF01020457.1 | 9.78   | 12.11  | 18.86  | 48.4   | 41.26  | 9.65   |
| GAIF01020458.1 | 25.79  | 63.61  | 46.2   | 80.74  | 57.95  | 18.95  |
| GAIF01020460.1 | 0.28   | 0.31   | 0.19   | 0.16   | 0.59   | 0.12   |
| GAIF01020462.1 | 0      | 0.28   | 0.42   | 0      | 0.15   | 6.03   |
| GAIF01020464.1 | 0      | 0      | 0      | 0.08   | 0.08   | 0      |
| GAIF01020465.1 | 3.27   | 1.44   | 0.22   | 16.7   | 55.67  | 0.56   |
| GAIF01020466.1 | 0.74   | 1.07   | 0.27   | 1.38   | 4.43   | 0.05   |
| GAIF01020467.1 | 1.17   | 1.97   | 1.73   | 2.11   | 0      | 2.91   |
| GAIF01020468.1 | 0      | 0      | 0      | 0      | 0.07   | 0      |
| GAIF01020469.1 | 9.83   | 2.28   | 1.27   | 1.51   | 1.01   | 0      |
| GAIF01020470.1 | 24.1   | 26.42  | 31.87  | 113.29 | 105.91 | 20.61  |
| GAIF01020472.1 | 0.43   | 0.09   | 0      | 0.1    | 1.76   | 0.38   |
| GAIF01020473.1 | 18.31  | 24.64  | 23.17  | 23.38  | 14.59  | 8.53   |
| GAIF01020474.1 | 640.53 | 219.01 | 148.82 | 8.15   | 4.51   | 1.97   |
| GAIF01020475.1 | 2.25   | 0.64   | 0      | 0      | 1.32   | 0.39   |
| GAIF01020476.1 | 0      | 0      | 0      | 0      | 0.49   | 0      |
| GAIF01020477.1 | 0      | 0      | 0      | 0.55   | 1.39   | 0      |
| GAIF01020478.1 | 270.1  | 225.37 | 145.07 | 237.05 | 335.99 | 953.8  |
| GAIF01020479.1 | 368.67 | 697.6  | 442.95 | 423.79 | 966.98 | 323.57 |
| GAIF01020480.1 | 0      | 0      | 0.06   | 0      | 0      | 0      |
| GAIF01020482.1 | 0      | 0      | 0      | 0.09   | 0.06   | 0      |
| GAIF01020484.1 | 0      | 0      | 0      | 0      | 0.26   | 0      |
| GAIF01020485.1 | 0      | 11.81  | 33.25  | 0      | 1.19   | 30.71  |
| GAIF01020486.1 | 9.09   | 11.61  | 4.59   | 5.69   | 6.25   | 1.11   |
| GAIF01020488.1 | 0.36   | 0.26   | 0.2    | 0.69   | 0.58   | 0.39   |
| GAIF01020490.1 | 0.25   | 0.4    | 0.95   | 0.72   | 1.04   | 0.27   |
| GAIF01020491.1 | 60.82  | 83.99  | 104.21 | 94.41  | 65.44  | 16.44  |
| GAIF01020492.1 | 0      | 0      | 0      | 0.48   | 3.96   | 0      |
| GAIF01020493.1 | 0      | 0      | 0.07   | 0.28   | 2.18   | 0.07   |
| GAIF01020495.1 | 0      | 0      | 0      | 0.01   | 0.01   | 0      |
| GAIF01020496.1 | 0      | 0.04   | 0      | 0.08   | 2.46   | 0.02   |
| GAIF01020497.1 | 12.67  | 8.32   | 8.4    | 15.67  | 20.89  | 6.28   |
| GAIF01020498.1 | 40.46  | 48.42  | 42.57  | 78.12  | 64.08  | 33.12  |
| GAIF01020499.1 | 13.69  | 15.1   | 0      | 15.45  | 77.16  | 16.08  |
| GAIF01020500.1 | 11.18  | 7.37   | 4.41   | 59.92  | 96.93  | 4.02   |

|                |        |        |        |        |        |       |
|----------------|--------|--------|--------|--------|--------|-------|
| GAIF01020501.1 | 0      | 0.08   | 0.15   | 0.08   | 0.33   | 0     |
| GAIF01020502.1 | 35.2   | 40.38  | 52.01  | 23.87  | 19.14  | 17.5  |
| GAIF01020503.1 | 0      | 0      | 0      | 1.57   | 3.75   | 0     |
| GAIF01020504.1 | 2.44   | 4.89   | 0.58   | 7.6    | 15.17  | 0     |
| GAIF01020505.1 | 0      | 0.56   | 0.19   | 0      | 0      | 0     |
| GAIF01020506.1 | 0      | 0.18   | 0      | 0      | 0.13   | 0     |
| GAIF01020507.1 | 0.09   | 0      | 0      | 0      | 0      | 0     |
| GAIF01020508.1 | 0      | 0      | 0.07   | 0.12   | 1.12   | 0     |
| GAIF01020509.1 | 2.35   | 1.8    | 4.08   | 1.24   | 0.85   | 1.28  |
| GAIF01020510.1 | 0      | 0      | 0      | 0.1    | 0      | 0     |
| GAIF01020511.1 | 2.39   | 1.75   | 0      | 11.82  | 23.65  | 3.13  |
| GAIF01020512.1 | 0      | 0      | 0      | 0      | 0.06   | 0     |
| GAIF01020514.1 | 0.17   | 0.28   | 0.09   | 0      | 0      | 0     |
| GAIF01020515.1 | 0      | 0      | 0      | 0      | 0.44   | 0.37  |
| GAIF01020518.1 | 4.42   | 1.95   | 2.69   | 1.34   | 1.58   | 1.05  |
| GAIF01020519.1 | 36.18  | 33.1   | 5.74   | 67.24  | 48.97  | 3.3   |
| GAIF01020520.1 | 13.47  | 0      | 0      | 3.43   | 3.78   | 27.8  |
| GAIF01020521.1 | 0.7    | 0.43   | 0.37   | 0.43   | 0.29   | 0.1   |
| GAIF01020523.1 | 6.63   | 8.43   | 7.63   | 12.05  | 6.24   | 4.75  |
| GAIF01020524.1 | 9      | 4.32   | 1.93   | 23.4   | 45.81  | 3.7   |
| GAIF01020525.1 | 0      | 0      | 0.03   | 0      | 0.21   | 0     |
| GAIF01020526.1 | 3.09   | 0      | 0.64   | 0.22   | 0.46   | 0     |
| GAIF01020527.1 | 0.01   | 0      | 0      | 0.01   | 0.12   | 0     |
| GAIF01020528.1 | 25.14  | 27.07  | 12.39  | 79.85  | 72.02  | 2.95  |
| GAIF01020529.1 | 4.89   | 9.9    | 5.07   | 12.35  | 9.55   | 1.13  |
| GAIF01020530.1 | 5.03   | 2.76   | 2.09   | 0.95   | 1.03   | 0.3   |
| GAIF01020532.1 | 4.1    | 3.75   | 1.23   | 11.78  | 22.62  | 1.33  |
| GAIF01020534.1 | 3.97   | 0.44   | 0      | 23.09  | 107.9  | 23.14 |
| GAIF01020535.1 | 0.05   | 0      | 0      | 0      | 0.06   | 0     |
| GAIF01020536.1 | 0      | 0.05   | 0      | 0.06   | 1.07   | 0     |
| GAIF01020538.1 | 0.31   | 0.25   | 0.09   | 0.96   | 8.45   | 0.17  |
| GAIF01020541.1 | 12     | 2.54   | 1.03   | 0.36   | 0.18   | 0.34  |
| GAIF01020542.1 | 0.14   | 0      | 0      | 0.25   | 0.05   | 0.07  |
| GAIF01020543.1 | 0.19   | 0      | 0      | 1.1    | 4.47   | 0.28  |
| GAIF01020544.1 | 40.83  | 105.07 | 103.45 | 367.23 | 331.23 | 36.54 |
| GAIF01020545.1 | 0      | 0      | 0      | 0.05   | 0.56   | 0.03  |
| GAIF01020546.1 | 2.14   | 1.98   | 0.46   | 1.54   | 0.55   | 0     |
| GAIF01020547.1 | 0.88   | 0.1    | 0      | 0      | 0      | 0.02  |
| GAIF01020548.1 | 17.11  | 24.76  | 18.4   | 36.78  | 26.9   | 8.26  |
| GAIF01020552.1 | 0      | 0.12   | 0      | 0      | 0      | 0     |
| GAIF01020553.1 | 36.3   | 32.7   | 50.12  | 51.81  | 28.29  | 34.6  |
| GAIF01020555.1 | 0.08   | 0.17   | 0.25   | 1.08   | 5.86   | 0.34  |
| GAIF01020557.1 | 119.79 | 118.79 | 107.77 | 475.26 | 271.44 | 88.68 |
| GAIF01020558.1 | 0      | 0.06   | 0.06   | 0.07   | 0      | 0.06  |

|                |        |        |        |        |        |         |
|----------------|--------|--------|--------|--------|--------|---------|
| GAIF01020559.1 | 4.78   | 0.95   | 0      | 1.55   | 4.12   | 0       |
| GAIF01020560.1 | 10.01  | 5.25   | 3.03   | 14.82  | 22.05  | 4.59    |
| GAIF01020561.1 | 0      | 0.18   | 0.2    | 2.01   | 0.2    | 0.49    |
| GAIF01020564.1 | 0.09   | 0      | 0.05   | 0      | 0.54   | 0.36    |
| GAIF01020568.1 | 0      | 0      | 0      | 0.39   | 5.89   | 0.07    |
| GAIF01020569.1 | 262.55 | 172.94 | 111.92 | 286.53 | 339.37 | 438.15  |
| GAIF01020571.1 | 0      | 0      | 0.56   | 3.83   | 0      | 0       |
| GAIF01020574.1 | 32.58  | 26.72  | 18.27  | 92.68  | 77.71  | 17.57   |
| GAIF01020575.1 | 8.74   | 28.51  | 0      | 0      | 10.51  | 0       |
| GAIF01020577.1 | 1.03   | 0.63   | 0.73   | 1.19   | 0.44   | 0.28    |
| GAIF01020578.1 | 0.61   | 0.37   | 0.49   | 3.32   | 9.76   | 1.2     |
| GAIF01020579.1 | 27.6   | 91.44  | 33.13  | 23.89  | 71.92  | 6.96    |
| GAIF01020580.1 | 0      | 0.59   | 0.49   | 0      | 0      | 0       |
| GAIF01020581.1 | 0.17   | 0      | 0.14   | 0.34   | 0.76   | 0       |
| GAIF01020582.1 | 0.82   | 1.04   | 2.71   | 0      | 0.16   | 0.91    |
| GAIF01020583.1 | 0      | 0.05   | 0      | 0      | 0      | 0       |
| GAIF01020585.1 | 0.95   | 2.19   | 0.5    | 1.91   | 2.33   | 0.18    |
| GAIF01020586.1 | 0      | 0      | 0      | 0      | 2.21   | 0       |
| GAIF01020587.1 | 0      | 0      | 0.26   | 0.55   | 0.14   | 0       |
| GAIF01020589.1 | 0.22   | 0      | 0      | 0      | 0.95   | 0       |
| GAIF01020592.1 | 0      | 0.56   | 0      | 0      | 0      | 0       |
| GAIF01020594.1 | 0      | 0      | 0      | 0.15   | 0      | 0       |
| GAIF01020595.1 | 0      | 0.06   | 0      | 0      | 0      | 0       |
| GAIF01020596.1 | 10.24  | 14.11  | 18.52  | 30.29  | 13.53  | 6.12    |
| GAIF01020597.1 | 0.11   | 0      | 0      | 0.4    | 2.23   | 0       |
| GAIF01020598.1 | 0      | 0      | 0.12   | 0      | 0.13   | 0       |
| GAIF01020599.1 | 5.88   | 3.81   | 9.38   | 23.89  | 7.41   | 10.19   |
| GAIF01020600.1 | 25.11  | 20.78  | 20.08  | 23     | 14.39  | 9.71    |
| GAIF01020602.1 | 0      | 0      | 0      | 0      | 0.06   | 0       |
| GAIF01020605.1 | 39.4   | 18.25  | 15.45  | 67.12  | 98.11  | 50.82   |
| GAIF01020606.1 | 0.34   | 0.12   | 0      | 3.68   | 3.4    | 5.36    |
| GAIF01020607.1 | 0      | 0.06   | 0.03   | 0      | 0      | 0       |
| GAIF01020609.1 | 500.67 | 235.64 | 330.08 | 307.64 | 51.12  | 91.2    |
| GAIF01020611.1 | 0.12   | 0.13   | 0      | 1.81   | 12.72  | 0.4     |
| GAIF01020616.1 | 0      | 0      | 0.09   | 0      | 0.06   | 0       |
| GAIF01020618.1 | 0.47   | 0.85   | 0.55   | 0.82   | 1.15   | 0.15    |
| GAIF01020619.1 | 1.61   | 2.32   | 2.73   | 1.09   | 2.27   | 1.07    |
| GAIF01020620.1 | 4.5    | 4.81   | 0.97   | 12.78  | 19.53  | 0.35    |
| GAIF01020622.1 | 14.95  | 0      | 0      | 15     | 2.93   | 15.07   |
| GAIF01020626.1 | 15.66  | 26.19  | 21.16  | 66.87  | 57.52  | 11.91   |
| GAIF01020627.1 | 0.09   | 0.1    | 0      | 0.54   | 0.56   | 0       |
| GAIF01020628.1 | 285.43 | 150.22 | 144.83 | 141.25 | 151.36 | 1154.73 |
| GAIF01020629.1 | 0      | 0      | 0      | 0      | 0.14   | 0       |
| GAIF01020630.1 | 0.64   | 1.27   | 0.05   | 0.23   | 0.47   | 0.22    |

|                |        |        |        |        |        |         |
|----------------|--------|--------|--------|--------|--------|---------|
| GAIF01020631.1 | 8.53   | 7.52   | 0.93   | 17.51  | 25.42  | 4.9     |
| GAIF01020632.1 | 0      | 0.03   | 0.14   | 0      | 0      | 0.11    |
| GAIF01020633.1 | 468.45 | 230.58 | 132.81 | 815.66 | 479.36 | 111.71  |
| GAIF01020637.1 | 0      | 0      | 4.8    | 15.22  | 10.51  | 0       |
| GAIF01020638.1 | 4.37   | 8.63   | 1.31   | 20.27  | 25.06  | 0.33    |
| GAIF01020640.1 | 11.96  | 12.44  | 26.4   | 33.34  | 14.85  | 18.62   |
| GAIF01020641.1 | 0.89   | 1.86   | 1.96   | 9.24   | 5.28   | 1.61    |
| GAIF01020642.1 | 7.61   | 1.09   | 1.28   | 57.52  | 184.75 | 17.23   |
| GAIF01020643.1 | 0.23   | 0      | 0      | 0.2    | 0.48   | 0.19    |
| GAIF01020644.1 | 247.65 | 145.79 | 200.46 | 206.51 | 109.06 | 143     |
| GAIF01020647.1 | 15.21  | 16.32  | 12.64  | 23.31  | 29.26  | 22.7    |
| GAIF01020650.1 | 16.85  | 37.54  | 7.23   | 15     | 29.12  | 10.49   |
| GAIF01020651.1 | 1.8    | 3.42   | 1.89   | 1.39   | 1.62   | 0.17    |
| GAIF01020653.1 | 15.52  | 7.18   | 3.26   | 1.8    | 1.3    | 0.36    |
| GAIF01020655.1 | 12.28  | 9.14   | 14.11  | 43.6   | 33.61  | 23.96   |
| GAIF01020658.1 | 8.23   | 4.84   | 7.32   | 23.01  | 18.04  | 14.18   |
| GAIF01020659.1 | 0.98   | 0.25   | 0.29   | 0.71   | 4.65   | 0       |
| GAIF01020660.1 | 13.82  | 12.07  | 9.38   | 2.47   | 1.23   | 0.28    |
| GAIF01020662.1 | 0.62   | 0.45   | 0.23   | 0.5    | 12.33  | 0       |
| GAIF01020663.1 | 0      | 0      | 0      | 0      | 0.01   | 0       |
| GAIF01020665.1 | 696.88 | 531.67 | 620.34 | 428.66 | 521.33 | 1482.04 |
| GAIF01020668.1 | 76.81  | 136.66 | 230.54 | 98.75  | 86.29  | 58.1    |
| GAIF01020669.1 | 0.03   | 0      | 0      | 0.47   | 1.62   | 0       |
| GAIF01020670.1 | 0      | 0      | 0      | 0      | 0.03   | 0       |
| GAIF01020672.1 | 2.68   | 0.74   | 0.25   | 8.41   | 29.08  | 5.09    |
| GAIF01020674.1 | 0.21   | 0      | 0      | 0.74   | 2.56   | 0       |
| GAIF01020675.1 | 0.42   | 0.3    | 0      | 0.16   | 0.5    | 0       |
| GAIF01020680.1 | 0      | 0.17   | 0.13   | 0      | 0.02   | 0.03    |
| GAIF01020681.1 | 0      | 0      | 0      | 0.36   | 0.44   | 0.07    |
| GAIF01020684.1 | 245.86 | 74.74  | 64.16  | 110.73 | 159.93 | 296.14  |
| GAIF01020686.1 | 0      | 0      | 0      | 0      | 0.09   | 0       |
| GAIF01020687.1 | 1.45   | 2.54   | 1.15   | 0.37   | 0.1    | 0.8     |
| GAIF01020688.1 | 0.25   | 0.25   | 0      | 0      | 0.24   | 0       |
| GAIF01020690.1 | 0.08   | 0      | 0      | 1.24   | 3.41   | 0       |
| GAIF01020691.1 | 0      | 0.07   | 0      | 0.08   | 0.08   | 0       |
| GAIF01020692.1 | 12.06  | 16.51  | 3.98   | 45.06  | 44.94  | 2.5     |
| GAIF01020693.1 | 7.51   | 5.53   | 7.01   | 13.37  | 13.86  | 7.23    |
| GAIF01020694.1 | 7.52   | 6.37   | 8.55   | 20.33  | 16.02  | 5.84    |
| GAIF01020695.1 | 18.48  | 8.55   | 6.52   | 31.53  | 40.99  | 17.34   |
| GAIF01020697.1 | 0      | 0      | 0      | 0.49   | 0.17   | 0.15    |
| GAIF01020699.1 | 0.11   | 0      | 0.12   | 2.24   | 9.7    | 0.13    |
| GAIF01020700.1 | 1.97   | 1.13   | 0      | 4.37   | 3.76   | 0.52    |
| GAIF01020701.1 | 0.44   | 0.48   | 0.36   | 0.13   | 0.13   | 0       |
| GAIF01020705.1 | 0.83   | 0.13   | 0      | 1.51   | 5.42   | 2.09    |



|                |        |        |        |        |        |        |
|----------------|--------|--------|--------|--------|--------|--------|
| GAIF01020706.1 | 0      | 0      | 0      | 0      | 0.22   | 0      |
| GAIF01020707.1 | 0      | 0      | 0      | 0.13   | 0.48   | 0.56   |
| GAIF01020709.1 | 5.32   | 4.58   | 0.77   | 11.87  | 12.68  | 0.73   |
| GAIF01020710.1 | 25.96  | 17.24  | 25.21  | 38.09  | 18.93  | 18.22  |
| GAIF01020711.1 | 0      | 0      | 0      | 0.13   | 0      | 0      |
| GAIF01020712.1 | 6.3    | 6.82   | 5.76   | 23.39  | 19.98  | 5.59   |
| GAIF01020715.1 | 129.05 | 142.86 | 200.26 | 562.91 | 276.33 | 182.16 |
| GAIF01020716.1 | 0.37   | 0.8    | 0.61   | 0      | 0.66   | 0      |
| GAIF01020717.1 | 0      | 0      | 0      | 0      | 0.06   | 0      |
| GAIF01020719.1 | 1.16   | 0      | 0      | 4.04   | 0      | 0      |
| GAIF01020721.1 | 0      | 0.36   | 0.18   | 0.01   | 0      | 0.02   |
| GAIF01020722.1 | 0      | 0      | 0.01   | 0      | 0      | 0      |
| GAIF01020723.1 | 0.59   | 0.63   | 0.12   | 3.44   | 5.82   | 0.1    |
| GAIF01020724.1 | 0      | 0      | 0      | 1.93   | 3.27   | 0.14   |
| GAIF01020725.1 | 30.7   | 23.6   | 20.42  | 51.4   | 30.48  | 4.96   |
| GAIF01020727.1 | 109.82 | 49.28  | 83.34  | 86.25  | 60.38  | 720.22 |
| GAIF01020728.1 | 0      | 0      | 0      | 0      | 0.06   | 0      |
| GAIF01020730.1 | 0      | 0      | 0      | 0.46   | 0.12   | 0      |
| GAIF01020731.1 | 0      | 0      | 0      | 0.13   | 0      | 0      |
| GAIF01020733.1 | 0.04   | 0      | 0      | 1.2    | 5.83   | 0.43   |
| GAIF01020734.1 | 119.95 | 86.54  | 76.62  | 62.06  | 32.77  | 63.93  |
| GAIF01020736.1 | 0      | 0      | 0      | 0      | 0.14   | 0.26   |
| GAIF01020737.1 | 0.12   | 0.08   | 0.13   | 0.7    | 6.52   | 1.07   |
| GAIF01020738.1 | 2.67   | 1.81   | 0      | 0.19   | 1.4    | 0.18   |
| GAIF01020739.1 | 0      | 0      | 0.05   | 0      | 0.06   | 0      |
| GAIF01020740.1 | 0      | 0.06   | 0.06   | 0.3    | 0.62   | 0      |
| GAIF01020741.1 | 10.58  | 8.82   | 7.96   | 13.15  | 13.04  | 4.78   |
| GAIF01020742.1 | 0.06   | 0.07   | 0      | 0.07   | 0      | 0      |
| GAIF01020743.1 | 0      | 0      | 0      | 0.25   | 1.55   | 0.32   |
| GAIF01020744.1 | 0      | 0      | 0      | 0.05   | 0.16   | 0      |
| GAIF01020747.1 | 0      | 0      | 0      | 0.04   | 0      | 0      |
| GAIF01020748.1 | 0.11   | 0.19   | 0.37   | 0.13   | 0.07   | 0.06   |
| GAIF01020750.1 | 0      | 1.01   | 0.17   | 0.18   | 0      | 0.34   |
| GAIF01020751.1 | 31.36  | 22.16  | 9.65   | 44.25  | 41.24  | 3.47   |
| GAIF01020752.1 | 0.23   | 0      | 0.38   | 0      | 0.14   | 0.66   |
| GAIF01020754.1 | 8.56   | 10.86  | 7.21   | 34.6   | 42.59  | 4.43   |
| GAIF01020757.1 | 0.45   | 0.17   | 0.19   | 0.72   | 0.7    | 2.8    |
| GAIF01020759.1 | 0.22   | 0      | 0.08   | 0      | 0.35   | 0.03   |
| GAIF01020760.1 | 0.04   | 0.11   | 0      | 0.2    | 0      | 0.05   |
| GAIF01020761.1 | 40.57  | 36.46  | 72.71  | 75.48  | 29.56  | 58.66  |
| GAIF01020762.1 | 0      | 0      | 0      | 0.1    | 0      | 0      |
| GAIF01020764.1 | 0      | 0.13   | 0.13   | 0      | 0      | 0      |
| GAIF01020765.1 | 0      | 0      | 0.12   | 0      | 0      | 0.36   |
| GAIF01020768.1 | 0.54   | 0.62   | 0.42   | 2.38   | 4.26   | 0.19   |

|                |        |        |        |        |        |        |
|----------------|--------|--------|--------|--------|--------|--------|
| GAIF01020769.1 | 57.57  | 117.24 | 80.73  | 103.91 | 108.52 | 13.63  |
| GAIF01020770.1 | 0.39   | 0.22   | 0      | 0      | 0      | 0      |
| GAIF01020771.1 | 0.25   | 1.66   | 1.47   | 0.3    | 0      | 0.91   |
| GAIF01020773.1 | 301.91 | 291.41 | 441.34 | 172.17 | 112.1  | 368.23 |
| GAIF01020774.1 | 15.34  | 11.88  | 20.28  | 29.47  | 17.8   | 15.05  |
| GAIF01020775.1 | 47.15  | 39.34  | 39.96  | 47.77  | 62.13  | 25.58  |
| GAIF01020777.1 | 0      | 0      | 0      | 0      | 0.05   | 0      |
| GAIF01020778.1 | 0      | 0      | 0      | 0.33   | 0.86   | 0.16   |
| GAIF01020780.1 | 0.08   | 0.18   | 0      | 0      | 0.1    | 0      |
| GAIF01020781.1 | 27.19  | 32.65  | 33.6   | 98.63  | 80.49  | 16.52  |
| GAIF01020782.1 | 0.08   | 0.05   | 0      | 0.2    | 1.78   | 0      |
| GAIF01020783.1 | 0      | 0      | 0      | 0.15   | 1.17   | 0      |
| GAIF01020784.1 | 0      | 1.06   | 0.7    | 0      | 0      | 0.12   |
| GAIF01020785.1 | 3.33   | 3.04   | 1.89   | 8.22   | 10.72  | 1.77   |
| GAIF01020786.1 | 7.9    | 6.47   | 3.27   | 18.65  | 20.3   | 2.38   |
| GAIF01020787.1 | 0.56   | 0      | 0.15   | 0.65   | 1.52   | 0.46   |
| GAIF01020788.1 | 0.08   | 0      | 0      | 0      | 0      | 0      |
| GAIF01020790.1 | 0      | 0      | 0      | 0.46   | 0.06   | 0      |
| GAIF01020791.1 | 48.73  | 20.91  | 16.77  | 9.12   | 15.71  | 0.69   |
| GAIF01020792.1 | 0.11   | 0      | 0      | 0.25   | 0      | 0      |
| GAIF01020793.1 | 0      | 0      | 0      | 0.09   | 0.7    | 0      |
| GAIF01020794.1 | 0      | 0      | 0      | 0.13   | 0.27   | 0      |
| GAIF01020795.1 | 0      | 0.14   | 0      | 0      | 0      | 0      |
| GAIF01020796.1 | 2.84   | 0.06   | 0.26   | 0.79   | 0.14   | 0      |
| GAIF01020797.1 | 0      | 0.01   | 0.06   | 0      | 0      | 0.01   |
| GAIF01020798.1 | 4.02   | 5.87   | 3.45   | 21.98  | 14.83  | 3.52   |
| GAIF01020799.1 | 0.3    | 0.32   | 0      | 2.24   | 8.41   | 0.33   |
| GAIF01020800.1 | 0      | 0      | 0      | 0      | 0.71   | 0      |
| GAIF01020803.1 | 14.79  | 13.42  | 5.26   | 1.36   | 2.04   | 0.3    |
| GAIF01020804.1 | 20.09  | 12.09  | 7.35   | 42.72  | 42.13  | 4.91   |
| GAIF01020805.1 | 33.52  | 12.47  | 18.47  | 1.92   | 4.95   | 20.75  |
| GAIF01020806.1 | 39.08  | 65.84  | 26.08  | 5.58   | 2.74   | 0      |
| GAIF01020807.1 | 0      | 0.1    | 0      | 0.2    | 0.42   | 0      |
| GAIF01020809.1 | 34.95  | 36.9   | 37.15  | 33.84  | 18.11  | 9.1    |
| GAIF01020810.1 | 2.14   | 1.5    | 0.98   | 6.94   | 22.43  | 0.44   |
| GAIF01020812.1 | 1.03   | 1.12   | 1.13   | 0.82   | 0      | 0.86   |
| GAIF01020814.1 | 0.53   | 0.16   | 0.16   | 5.68   | 19.54  | 0.16   |
| GAIF01020815.1 | 9.83   | 13     | 10.99  | 57.46  | 46.33  | 9.29   |
| GAIF01020816.1 | 2.9    | 0      | 0      | 16.5   | 36.65  | 0      |
| GAIF01020817.1 | 4.94   | 8.02   | 7.98   | 22.66  | 21.15  | 1.71   |
| GAIF01020818.1 | 0      | 0.08   | 0      | 0      | 0      | 0      |
| GAIF01020819.1 | 0.43   | 0.23   | 0      | 0.12   | 0      | 0      |
| GAIF01020820.1 | 5.58   | 2.9    | 0      | 6.83   | 8.44   | 0      |
| GAIF01020821.1 | 0      | 0.37   | 0      | 0      | 0      | 0      |

|                |         |         |         |         |         |        |
|----------------|---------|---------|---------|---------|---------|--------|
| GAIF01020822.1 | 0       | 0       | 0       | 0       | 0.09    | 0      |
| GAIF01020823.1 | 12.1    | 22.48   | 17.77   | 53.28   | 165.85  | 19.22  |
| GAIF01020826.1 | 0       | 0       | 0       | 0       | 0.89    | 0.1    |
| GAIF01020827.1 | 2.29    | 0.16    | 0.05    | 3.86    | 14.28   | 2.74   |
| GAIF01020828.1 | 0       | 0       | 0       | 0       | 0.14    | 0      |
| GAIF01020830.1 | 0.21    | 0.16    | 0.05    | 0.24    | 0.12    | 0      |
| GAIF01020831.1 | 4.03    | 4.39    | 8.86    | 4.68    | 4.85    | 0      |
| GAIF01020832.1 | 18.09   | 28.94   | 28.4    | 71.67   | 47.78   | 9.48   |
| GAIF01020833.1 | 0       | 0       | 0       | 0.01    | 0.01    | 0      |
| GAIF01020835.1 | 0       | 0       | 0       | 0       | 0.07    | 0      |
| GAIF01020836.1 | 0.14    | 0.04    | 0.11    | 0       | 0.37    | 0.48   |
| GAIF01020839.1 | 0       | 7.24    | 3.4     | 0       | 0       | 0.17   |
| GAIF01020840.1 | 2.22    | 0.58    | 1.37    | 2.78    | 1.27    | 2.81   |
| GAIF01020841.1 | 0       | 0       | 0.08    | 0       | 0       | 0      |
| GAIF01020842.1 | 124.52  | 110.05  | 115.22  | 138.64  | 195.69  | 103.3  |
| GAIF01020843.1 | 61.39   | 63.09   | 30.73   | 103.28  | 82.72   | 7.28   |
| GAIF01020844.1 | 0.08    | 0       | 0       | 0       | 0       | 0      |
| GAIF01020845.1 | 0.23    | 0       | 1.14    | 1.87    | 0.28    | 3.8    |
| GAIF01020846.1 | 0.16    | 0.09    | 0.27    | 0.66    | 2.75    | 1.08   |
| GAIF01020848.1 | 0       | 0       | 0       | 0.57    | 3.11    | 0      |
| GAIF01020850.1 | 195.21  | 200.77  | 215.06  | 87.1    | 63.58   | 48.22  |
| GAIF01020851.1 | 0       | 0.44    | 0.79    | 0       | 0       | 0      |
| GAIF01020852.1 | 0.72    | 0       | 0.79    | 53.96   | 35.55   | 270.9  |
| GAIF01020854.1 | 0.14    | 0       | 0       | 0       | 0       | 0      |
| GAIF01020857.1 | 6.21    | 4.4     | 2.52    | 8.63    | 12.78   | 1.57   |
| GAIF01020860.1 | 65.38   | 51.04   | 53.29   | 123.27  | 70.71   | 20.84  |
| GAIF01020863.1 | 291.84  | 1.48    | 1.28    | 13.2    | 0.82    | 1.71   |
| GAIF01020864.1 | 9.67    | 15.48   | 0.58    | 55.37   | 81.39   | 0.27   |
| GAIF01020865.1 | 12.88   | 6.63    | 9.2     | 16.47   | 17.8    | 16.15  |
| GAIF01020866.1 | 0       | 0       | 0       | 0       | 0       | 0.07   |
| GAIF01020867.1 | 0.37    | 0.16    | 0.08    | 0.6     | 0.88    | 0.08   |
| GAIF01020869.1 | 37.8    | 35.63   | 24      | 4.93    | 0.93    | 0.55   |
| GAIF01020871.1 | 17.93   | 22.52   | 24.59   | 47.05   | 21.25   | 10.2   |
| GAIF01020872.1 | 0.26    | 0.28    | 0.14    | 0.3     | 0       | 0.14   |
| GAIF01020873.1 | 0.45    | 0.08    | 0.05    | 0       | 0.1     | 0.01   |
| GAIF01020874.1 | 12.69   | 9.01    | 3.58    | 13.51   | 7.54    | 3.95   |
| GAIF01020875.1 | 0.15    | 0.05    | 0       | 0.11    | 0.12    | 0      |
| GAIF01020876.1 | 30.32   | 29.42   | 6.77    | 103.77  | 119.94  | 4.49   |
| GAIF01020877.1 | 94.57   | 125.6   | 149.11  | 137.69  | 150.46  | 48.67  |
| GAIF01020878.1 | 88.63   | 55.93   | 33.76   | 19.44   | 51.64   | 6.86   |
| GAIF01020880.1 | 2.91    | 1.06    | 3.2     | 7.89    | 2.34    | 8.56   |
| GAIF01020881.1 | 24.56   | 13.79   | 6.86    | 34      | 41.94   | 10.45  |
| GAIF01020882.1 | 0       | 0       | 0       | 0.22    | 0       | 0      |
| GAIF01020883.1 | 1931.86 | 6519.95 | 2229.89 | 1384.76 | 2092.21 | 444.71 |

|                |       |       |       |        |       |        |
|----------------|-------|-------|-------|--------|-------|--------|
| GAIF01020884.1 | 0     | 0     | 0     | 0.11   | 0.11  | 0      |
| GAIF01020885.1 | 31.35 | 29.32 | 21.19 | 11.07  | 8.23  | 1.76   |
| GAIF01020886.1 | 0.31  | 0.21  | 0     | 6.4    | 33.46 | 1.67   |
| GAIF01020888.1 | 0     | 0.38  | 0     | 0      | 0     | 0.38   |
| GAIF01020889.1 | 0.18  | 0.06  | 0.2   | 0.09   | 0.06  | 0.12   |
| GAIF01020891.1 | 0     | 0     | 0.08  | 0      | 0.13  | 0      |
| GAIF01020892.1 | 0     | 0     | 0     | 0.15   | 0     | 0      |
| GAIF01020895.1 | 0     | 0.08  | 0     | 0.08   | 1.26  | 0.15   |
| GAIF01020896.1 | 0.05  | 0     | 0.11  | 2.51   | 7.93  | 0.53   |
| GAIF01020897.1 | 26.7  | 0.23  | 2.58  | 18.84  | 7.71  | 51.8   |
| GAIF01020898.1 | 0.51  | 0     | 0     | 2.63   | 14.37 | 5.24   |
| GAIF01020899.1 | 0.16  | 0     | 0     | 1.37   | 7.64  | 0      |
| GAIF01020901.1 | 0     | 0     | 0     | 0.12   | 0.13  | 0      |
| GAIF01020903.1 | 71.18 | 70.59 | 36.06 | 17.55  | 8.22  | 1.8    |
| GAIF01020904.1 | 10.16 | 5.9   | 4.99  | 38.97  | 39.23 | 5.35   |
| GAIF01020905.1 | 12.36 | 7.22  | 12.14 | 23.16  | 14.82 | 33.37  |
| GAIF01020906.1 | 4.32  | 1.53  | 0     | 6.4    | 10.06 | 0.92   |
| GAIF01020907.1 | 0     | 2.05  | 0     | 0      | 12.82 | 4.02   |
| GAIF01020909.1 | 0.56  | 0.24  | 0     | 1.43   | 1.35  | 0.25   |
| GAIF01020910.1 | 0     | 0     | 0     | 0      | 0.08  | 0      |
| GAIF01020911.1 | 49.07 | 22.68 | 14.38 | 109.54 | 56.4  | 102.63 |
| GAIF01020912.1 | 10.03 | 12.03 | 5.64  | 1.72   | 0.9   | 0.45   |
| GAIF01020913.1 | 0     | 0     | 0     | 0.02   | 0.11  | 0      |
| GAIF01020914.1 | 0.69  | 0.29  | 0     | 1.68   | 3.24  | 0      |
| GAIF01020917.1 | 0     | 0     | 0.08  | 0.68   | 0.97  | 0.08   |
| GAIF01020921.1 | 0     | 0     | 0     | 0.33   | 2.4   | 0      |
| GAIF01020922.1 | 1.99  | 0.93  | 3.58  | 1.65   | 1.02  | 0.16   |
| GAIF01020923.1 | 13.68 | 10.14 | 5.66  | 43.4   | 53.09 | 5.29   |
| GAIF01020925.1 | 0.01  | 0.03  | 0     | 0.07   | 0.1   | 0      |
| GAIF01020926.1 | 1.79  | 1.58  | 0.19  | 17.92  | 55.88 | 1.78   |
| GAIF01020927.1 | 0.96  | 0.3   | 0     | 0.79   | 1.81  | 0.3    |
| GAIF01020930.1 | 17.38 | 15.45 | 14.33 | 10.64  | 7.51  | 3.71   |
| GAIF01020931.1 | 29.62 | 19.69 | 7.18  | 51.21  | 60.28 | 23.86  |
| GAIF01020932.1 | 11.11 | 14.79 | 25.71 | 36.39  | 16.81 | 15.24  |
| GAIF01020933.1 | 0.32  | 0     | 0.12  | 0.62   | 2.56  | 0      |
| GAIF01020934.1 | 2.19  | 0     | 0.25  | 0.47   | 3.76  | 0.18   |
| GAIF01020936.1 | 0.06  | 0.07  | 0     | 0.74   | 2.6   | 0.14   |
| GAIF01020937.1 | 0.17  | 0.17  | 0.38  | 0      | 1.49  | 1.18   |
| GAIF01020940.1 | 4.96  | 14.05 | 6.52  | 12.89  | 17.76 | 1.81   |
| GAIF01020943.1 | 16.73 | 5.35  | 2.4   | 52.96  | 66.54 | 7.29   |
| GAIF01020944.1 | 0     | 0     | 0     | 0      | 11.78 | 0      |
| GAIF01020945.1 | 4.49  | 0.2   | 0.1   | 4.13   | 5.74  | 5.47   |
| GAIF01020947.1 | 0.86  | 0     | 0     | 0.33   | 2.06  | 0.94   |
| GAIF01020948.1 | 0     | 0.04  | 0.17  | 0      | 0     | 0      |

|                |        |        |        |        |        |         |
|----------------|--------|--------|--------|--------|--------|---------|
| GAIF01020950.1 | 0.16   | 0.23   | 0.12   | 1.88   | 2.76   | 0.18    |
| GAIF01020951.1 | 208.56 | 214.34 | 186.89 | 56.76  | 26.27  | 8.93    |
| GAIF01020952.1 | 4.63   | 1.31   | 0.22   | 0.47   | 0.85   | 0.44    |
| GAIF01020953.1 | 7.19   | 10.89  | 5.59   | 9.9    | 18.04  | 2.02    |
| GAIF01020954.1 | 0.72   | 0.22   | 0      | 6.83   | 17.97  | 0.34    |
| GAIF01020955.1 | 0.23   | 0.04   | 0.38   | 0.47   | 0.09   | 1.21    |
| GAIF01020956.1 | 37.07  | 24.76  | 33.03  | 58.46  | 37.58  | 57.89   |
| GAIF01020959.1 | 0.09   | 0.03   | 0.05   | 0.31   | 1.58   | 0.81    |
| GAIF01020960.1 | 0      | 0      | 0      | 0.35   | 0      | 0       |
| GAIF01020963.1 | 0.23   | 0.17   | 0      | 0.82   | 4.51   | 0       |
| GAIF01020965.1 | 24.1   | 31.57  | 11.13  | 24.87  | 62.24  | 14.26   |
| GAIF01020966.1 | 0      | 0      | 0.04   | 0      | 0      | 0       |
| GAIF01020968.1 | 3.22   | 0.23   | 0.12   | 11.46  | 73.21  | 1.06    |
| GAIF01020969.1 | 0.08   | 0      | 0      | 0.09   | 0.33   | 0       |
| GAIF01020970.1 | 11.76  | 21.08  | 20.76  | 19     | 16.49  | 3.45    |
| GAIF01020971.1 | 7.24   | 6.93   | 7.03   | 27.57  | 23.67  | 3.73    |
| GAIF01020972.1 | 0.6    | 0.95   | 0.06   | 5.1    | 6.71   | 1.47    |
| GAIF01020973.1 | 10.24  | 3.53   | 3.37   | 17.73  | 19.68  | 7.31    |
| GAIF01020974.1 | 312.8  | 389.71 | 230.69 | 266.13 | 219.84 | 163.53  |
| GAIF01020975.1 | 0.14   | 0      | 0      | 0.46   | 2.06   | 0.11    |
| GAIF01020976.1 | 4.69   | 2.42   | 7.59   | 2.29   | 1.78   | 0.54    |
| GAIF01020977.1 | 107.26 | 83.36  | 64.16  | 59.08  | 82.68  | 49.42   |
| GAIF01020978.1 | 1.66   | 1.41   | 1.92   | 2.7    | 1.81   | 2.39    |
| GAIF01020980.1 | 1      | 1.01   | 0.68   | 3.23   | 1.3    | 0.43    |
| GAIF01020981.1 | 0.69   | 0.15   | 0.15   | 2.09   | 12.66  | 1.53    |
| GAIF01020982.1 | 1.22   | 0.09   | 0      | 2.83   | 11.43  | 5.29    |
| GAIF01020984.1 | 0      | 0      | 0      | 0.12   | 1.77   | 0       |
| GAIF01020985.1 | 0.63   | 0      | 0.17   | 0.55   | 2.67   | 0.17    |
| GAIF01020986.1 | 0      | 0      | 0      | 0.14   | 0.31   | 0       |
| GAIF01020988.1 | 97.55  | 112.52 | 43.41  | 114.52 | 124.61 | 25.35   |
| GAIF01020989.1 | 10.87  | 10.46  | 6.42   | 45.73  | 24.04  | 5.47    |
| GAIF01020990.1 | 0.09   | 0      | 0      | 0      | 0      | 0       |
| GAIF01020991.1 | 0.18   | 1.06   | 0.29   | 0.82   | 2.97   | 0       |
| GAIF01020992.1 | 0      | 0.3    | 0      | 2.88   | 8.41   | 0.17    |
| GAIF01020994.1 | 0.24   | 0.07   | 0.46   | 0.07   | 0.07   | 0.13    |
| GAIF01020997.1 | 413.84 | 396.52 | 402.76 | 882.3  | 925.43 | 1061.66 |
| GAIF01020998.1 | 0.89   | 0.14   | 0.22   | 4.8    | 21.3   | 0.28    |
| GAIF01020999.1 | 0      | 0      | 0      | 0      | 0.12   | 0       |
| GAIF01021001.1 | 8.48   | 5.19   | 4.16   | 16.41  | 32.68  | 5.23    |
| GAIF01021002.1 | 0.31   | 0      | 0      | 1      | 11.13  | 0.09    |
| GAIF01021003.1 | 0      | 0      | 0      | 0      | 0.19   | 0       |
| GAIF01021004.1 | 8.15   | 6.3    | 8.25   | 16.7   | 17.09  | 10.47   |
| GAIF01021005.1 | 3.55   | 3.96   | 0.22   | 13.26  | 20.61  | 0.33    |
| GAIF01021006.1 | 2.9    | 2.49   | 2.52   | 0.47   | 0.32   | 0.59    |

|                |         |         |         |         |         |         |
|----------------|---------|---------|---------|---------|---------|---------|
| GAIF01021010.1 | 33.53   | 25.38   | 28.81   | 48.55   | 56.05   | 65.61   |
| GAIF01021011.1 | 140.36  | 137.2   | 115.64  | 208.48  | 180.08  | 144.14  |
| GAIF01021012.1 | 0.28    | 0.08    | 0.04    | 0.81    | 4.2     | 0.15    |
| GAIF01021014.1 | 0       | 0       | 0.04    | 0       | 0       | 0       |
| GAIF01021015.1 | 0.15    | 0.04    | 0.08    | 0       | 0.02    | 0.01    |
| GAIF01021017.1 | 0       | 0.49    | 0.28    | 0.33    | 0       | 0.43    |
| GAIF01021021.1 | 2.69    | 5.76    | 3.77    | 4.21    | 2.68    | 0.1     |
| GAIF01021022.1 | 97.1    | 99.23   | 63.29   | 168.82  | 155.79  | 36.42   |
| GAIF01021023.1 | 0       | 0       | 0       | 0       | 0.25    | 0       |
| GAIF01021024.1 | 0       | 0       | 0       | 0.01    | 0.01    | 0       |
| GAIF01021025.1 | 0       | 0.06    | 0.06    | 0.06    | 0.07    | 0       |
| GAIF01021026.1 | 0.07    | 0       | 0       | 0       | 0       | 0       |
| GAIF01021027.1 | 5933.86 | 6704.03 | 8958.67 | 3637.62 | 2890.18 | 7756.05 |
| GAIF01021028.1 | 6.04    | 1.03    | 0.47    | 9.12    | 26.37   | 5.61    |
| GAIF01021029.1 | 0       | 0       | 0       | 0       | 3.26    | 0       |
| GAIF01021030.1 | 72.1    | 83.76   | 37.66   | 49.05   | 38.26   | 7.1     |
| GAIF01021031.1 | 0.13    | 0.09    | 0       | 0.47    | 0.69    | 0.05    |
| GAIF01021032.1 | 0       | 2.53    | 0.91    | 0       | 0.09    | 0.41    |
| GAIF01021034.1 | 0.3     | 0       | 0.11    | 0.1     | 0.24    | 0.11    |
| GAIF01021035.1 | 0.15    | 0       | 0.09    | 0.19    | 0.42    | 0.09    |
| GAIF01021038.1 | 0       | 0       | 0       | 0       | 0.17    | 0       |
| GAIF01021039.1 | 17.13   | 19.95   | 14.33   | 42.83   | 32      | 4.94    |
| GAIF01021040.1 | 23.66   | 27.18   | 25.65   | 44.03   | 21.47   | 7.21    |
| GAIF01021042.1 | 0.71    | 0.64    | 0.13    | 0.2     | 0.07    | 0       |
| GAIF01021043.1 | 0.29    | 0.21    | 0       | 0       | 0       | 0       |
| GAIF01021044.1 | 24.06   | 3.14    | 0.81    | 48.1    | 97.41   | 8.45    |
| GAIF01021046.1 | 1.85    | 0.98    | 0       | 17.64   | 44.98   | 3.42    |
| GAIF01021047.1 | 0.1     | 0.08    | 0       | 0.68    | 8.8     | 0.88    |
| GAIF01021048.1 | 0.15    | 0       | 0       | 0       | 3.53    | 0.16    |
| GAIF01021049.1 | 18.03   | 17.55   | 8.37    | 34.78   | 42.16   | 2.38    |
| GAIF01021051.1 | 0.63    | 0.17    | 0       | 0.37    | 0       | 0.17    |
| GAIF01021052.1 | 0       | 0       | 0       | 1.31    | 9.82    | 0       |
| GAIF01021053.1 | 0       | 0       | 0       | 1.24    | 3.87    | 0.24    |
| GAIF01021054.1 | 0       | 0.28    | 0       | 0       | 1.84    | 0       |
| GAIF01021055.1 | 39.82   | 55.21   | 96.25   | 26.27   | 23.63   | 69.75   |
| GAIF01021057.1 | 8.46    | 8.95    | 1.02    | 20.44   | 20.63   | 0       |
| GAIF01021058.1 | 3.76    | 2       | 0.67    | 1.25    | 0.09    | 0       |
| GAIF01021059.1 | 0       | 0       | 0       | 0       | 0.07    | 0       |
| GAIF01021061.1 | 20.37   | 23.08   | 44.93   | 11.73   | 15.91   | 13.14   |
| GAIF01021062.1 | 0.1     | 0       | 0       | 0       | 0.38    | 0       |
| GAIF01021065.1 | 0.81    | 0.2     | 0.17    | 2.1     | 4.78    | 1.16    |
| GAIF01021066.1 | 20.2    | 40.94   | 7.42    | 10.26   | 23.07   | 1.49    |
| GAIF01021068.1 | 17.46   | 15.07   | 23.85   | 11.14   | 13.95   | 23.21   |
| GAIF01021069.1 | 0       | 0       | 0       | 0       | 0.56    | 0       |

|                |        |        |        |        |        |       |
|----------------|--------|--------|--------|--------|--------|-------|
| GAIF01021070.1 | 4.96   | 1.47   | 1.93   | 0.22   | 0.18   | 0.25  |
| GAIF01021071.1 | 0      | 0      | 0      | 0      | 0      | 0.06  |
| GAIF01021072.1 | 61.37  | 51.18  | 69.04  | 117.48 | 49.3   | 68.05 |
| GAIF01021073.1 | 0.13   | 0      | 0.14   | 0.15   | 0.15   | 0     |
| GAIF01021074.1 | 3.39   | 0      | 0.48   | 0      | 0.13   | 0     |
| GAIF01021076.1 | 0      | 0.15   | 0      | 0.33   | 3.94   | 0     |
| GAIF01021077.1 | 10.24  | 7.01   | 3.4    | 33.2   | 34.51  | 2.13  |
| GAIF01021078.1 | 1.2    | 0.95   | 1.03   | 2.41   | 2.75   | 1.62  |
| GAIF01021080.1 | 3.82   | 6.24   | 5.68   | 14.57  | 20.71  | 1.31  |
| GAIF01021081.1 | 20.38  | 14.08  | 17.64  | 45.77  | 25.28  | 31.01 |
| GAIF01021082.1 | 2.46   | 0.91   | 1.46   | 1.5    | 0.06   | 0.18  |
| GAIF01021083.1 | 0.03   | 0.21   | 0.11   | 0.02   | 0.07   | 0.19  |
| GAIF01021084.1 | 1.31   | 0.49   | 0.67   | 2.05   | 10.1   | 16.12 |
| GAIF01021085.1 | 4.43   | 1.41   | 4.59   | 8.07   | 8.17   | 0     |
| GAIF01021086.1 | 1.17   | 3.59   | 3.26   | 0.76   | 0.4    | 0.61  |
| GAIF01021088.1 | 0      | 5.47   | 10.69  | 0      | 0.13   | 9.64  |
| GAIF01021091.1 | 0      | 0      | 0      | 0      | 0.12   | 0     |
| GAIF01021092.1 | 0      | 0      | 0      | 0      | 0.71   | 0.15  |
| GAIF01021093.1 | 348.87 | 544.79 | 213.61 | 320.29 | 367.95 | 23.06 |
| GAIF01021094.1 | 2.87   | 2.43   | 0.99   | 5.06   | 10.23  | 7.5   |
| GAIF01021095.1 | 0      | 0      | 0.14   | 0.15   | 0.95   | 0     |
| GAIF01021098.1 | 15.82  | 23.59  | 4.95   | 27.84  | 30.83  | 0.39  |
| GAIF01021099.1 | 0.57   | 0.26   | 0.43   | 0      | 0.26   | 0.03  |
| GAIF01021100.1 | 40.29  | 40.14  | 36.28  | 107.97 | 47.37  | 21.43 |
| GAIF01021101.1 | 0.21   | 0.42   | 0.69   | 0.51   | 0.35   | 0     |
| GAIF01021102.1 | 16.42  | 4.85   | 3.03   | 16.24  | 13.33  | 4.82  |
| GAIF01021103.1 | 53.6   | 62.1   | 162.64 | 43.71  | 43.56  | 201.6 |
| GAIF01021104.1 | 0      | 0      | 0      | 0      | 0.5    | 0     |
| GAIF01021105.1 | 11.56  | 18.09  | 10.53  | 26.21  | 25.31  | 6.17  |
| GAIF01021106.1 | 0.1    | 0      | 0.33   | 0.12   | 0.12   | 0     |
| GAIF01021107.1 | 0.31   | 0.07   | 0      | 1.38   | 9.34   | 0     |
| GAIF01021109.1 | 34.51  | 0.81   | 3.48   | 32.1   | 25.23  | 33.36 |
| GAIF01021110.1 | 259.41 | 135.57 | 96.52  | 53.28  | 74.95  | 44.66 |
| GAIF01021111.1 | 0      | 0      | 0      | 0      | 0.54   | 0.25  |
| GAIF01021112.1 | 0.13   | 0.1    | 0.19   | 0.05   | 0.26   | 0     |
| GAIF01021113.1 | 0      | 0      | 0      | 0.08   | 0.26   | 0     |
| GAIF01021114.1 | 4.37   | 16.54  | 8.79   | 33.82  | 36.13  | 2.69  |
| GAIF01021115.1 | 94.69  | 72.54  | 69.24  | 81.07  | 37.76  | 11.92 |
| GAIF01021116.1 | 0      | 0      | 0.18   | 0.75   | 1.74   | 0     |
| GAIF01021117.1 | 45.53  | 76.04  | 35.14  | 7.48   | 3.43   | 4.19  |
| GAIF01021118.1 | 3.82   | 4.74   | 5.48   | 15.5   | 12.06  | 14.52 |
| GAIF01021119.1 | 6.56   | 5.89   | 6.3    | 19.04  | 7.3    | 9.67  |
| GAIF01021120.1 | 264.08 | 181.88 | 129.63 | 504.18 | 373.12 | 85.37 |
| GAIF01021122.1 | 0      | 0.11   | 0      | 0.11   | 0.12   | 0     |

|                |         |         |        |         |         |        |
|----------------|---------|---------|--------|---------|---------|--------|
| GAIF01021123.1 | 1.92    | 0.21    | 0.11   | 4.09    | 16.29   | 0.64   |
| GAIF01021125.1 | 1.51    | 0.14    | 0      | 2.78    | 18.82   | 1.53   |
| GAIF01021126.1 | 0       | 0       | 0      | 0       | 2.67    | 0      |
| GAIF01021127.1 | 0       | 0.13    | 0.04   | 0       | 0.94    | 0      |
| GAIF01021128.1 | 4.88    | 4.05    | 5.1    | 16.96   | 14.95   | 3.22   |
| GAIF01021129.1 | 0       | 0       | 0      | 0.43    | 1.54    | 0.12   |
| GAIF01021130.1 | 0       | 0       | 0.09   | 0       | 0.4     | 0      |
| GAIF01021133.1 | 31      | 43.58   | 63.55  | 23.81   | 15.32   | 23.27  |
| GAIF01021134.1 | 0       | 0       | 0.07   | 0       | 0.07    | 0      |
| GAIF01021136.1 | 5.11    | 10.81   | 24.58  | 5.7     | 4.2     | 8.85   |
| GAIF01021139.1 | 41.05   | 35.47   | 14.06  | 54.14   | 40.96   | 4.35   |
| GAIF01021140.1 | 3.61    | 0.64    | 1.13   | 2.21    | 1.38    | 0.36   |
| GAIF01021144.1 | 0       | 0       | 0      | 0       | 0.11    | 0      |
| GAIF01021146.1 | 0       | 0.73    | 0.37   | 0       | 0       | 0      |
| GAIF01021147.1 | 0.03    | 0.07    | 0.1    | 0.04    | 0.08    | 0      |
| GAIF01021148.1 | 1.42    | 0.89    | 1.25   | 2.43    | 4.81    | 1.91   |
| GAIF01021149.1 | 11.13   | 0       | 0.01   | 0.01    | 0.01    | 0      |
| GAIF01021150.1 | 0.61    | 0.53    | 0.73   | 0.47    | 1.72    | 0      |
| GAIF01021151.1 | 0       | 0       | 0      | 0.32    | 1.65    | 0.24   |
| GAIF01021152.1 | 22.58   | 26.3    | 16.28  | 35.47   | 31.12   | 5.52   |
| GAIF01021154.1 | 0       | 0       | 0      | 0.06    | 0.07    | 0      |
| GAIF01021155.1 | 0.05    | 0       | 0      | 0.2     | 1.05    | 0      |
| GAIF01021157.1 | 3.93    | 1.57    | 0.34   | 6.2     | 3.09    | 0      |
| GAIF01021158.1 | 42.03   | 23.67   | 4.98   | 64.1    | 26.57   | 13.86  |
| GAIF01021159.1 | 0.25    | 0.28    | 0      | 2.51    | 14.56   | 0.56   |
| GAIF01021160.1 | 0       | 0.13    | 0      | 0       | 0.29    | 0      |
| GAIF01021161.1 | 0.21    | 0       | 0.12   | 0.97    | 2.65    | 0.12   |
| GAIF01021162.1 | 0.31    | 2.2     | 0      | 2.51    | 5.49    | 0      |
| GAIF01021163.1 | 11.72   | 7.94    | 5.65   | 62.38   | 68.06   | 4.92   |
| GAIF01021166.1 | 0.57    | 0.61    | 0.1    | 1.12    | 0.22    | 0      |
| GAIF01021167.1 | 1422.77 | 1393.69 | 540.62 | 1278.54 | 1224.46 | 354.91 |
| GAIF01021168.1 | 10.8    | 4.24    | 7.07   | 50.18   | 78.84   | 30.43  |
| GAIF01021169.1 | 0.07    | 0       | 0      | 0       | 0       | 0      |
| GAIF01021170.1 | 0.17    | 0.06    | 0      | 1.01    | 5.74    | 0.19   |
| GAIF01021171.1 | 1.23    | 0.54    | 0      | 2.36    | 12.27   | 0.61   |
| GAIF01021172.1 | 0.71    | 0.09    | 0.17   | 1.57    | 7.58    | 0.24   |
| GAIF01021173.1 | 0       | 0.1     | 0      | 0       | 0       | 0      |
| GAIF01021177.1 | 1.37    | 0.62    | 0      | 1.67    | 5.23    | 0      |
| GAIF01021178.1 | 0.05    | 0       | 0      | 0.05    | 0       | 0      |
| GAIF01021179.1 | 148.55  | 108.52  | 68.73  | 85.72   | 36.79   | 13.9   |
| GAIF01021180.1 | 0.44    | 0.29    | 0      | 0.81    | 6.84    | 0.39   |
| GAIF01021181.1 | 0.61    | 0       | 0      | 1.56    | 5.28    | 0.27   |
| GAIF01021182.1 | 0.1     | 0       | 0      | 0       | 0.12    | 0      |
| GAIF01021183.1 | 0.41    | 0       | 0.22   | 5.66    | 21.74   | 0.11   |



|                |       |       |       |       |       |        |
|----------------|-------|-------|-------|-------|-------|--------|
| GAIF01021184.1 | 0     | 0     | 0     | 0     | 0.5   | 0      |
| GAIF01021185.1 | 0     | 0     | 0     | 0     | 0.15  | 0      |
| GAIF01021186.1 | 0     | 0.41  | 0.14  | 0.15  | 0.61  | 0.14   |
| GAIF01021188.1 | 1.88  | 4.92  | 1.82  | 5.76  | 4.78  | 0.12   |
| GAIF01021191.1 | 34.26 | 29.17 | 10.54 | 88.42 | 111.6 | 34.23  |
| GAIF01021192.1 | 3.55  | 7.55  | 6.81  | 16.42 | 12.43 | 3.1    |
| GAIF01021194.1 | 0.42  | 0.08  | 0     | 1.37  | 3.92  | 0      |
| GAIF01021195.1 | 0     | 0     | 0     | 0     | 1.02  | 0.15   |
| GAIF01021196.1 | 0     | 0     | 0     | 0     | 0.48  | 0      |
| GAIF01021197.1 | 1.87  | 0     | 0     | 0     | 0     | 0      |
| GAIF01021198.1 | 12.16 | 3.58  | 1.9   | 23.44 | 25.94 | 10.09  |
| GAIF01021200.1 | 2.43  | 5.67  | 4.79  | 13.65 | 8.9   | 0.8    |
| GAIF01021203.1 | 0.31  | 0.8   | 0.23  | 0.73  | 0.5   | 0.12   |
| GAIF01021204.1 | 0.15  | 0.17  | 0     | 0     | 0.18  | 0      |
| GAIF01021205.1 | 1.08  | 15.32 | 91.09 | 0     | 2.78  | 103.52 |
| GAIF01021206.1 | 6.45  | 8.04  | 5.83  | 12.43 | 5     | 3.96   |
| GAIF01021207.1 | 0     | 0     | 0     | 1.31  | 7.37  | 0      |
| GAIF01021208.1 | 0     | 0     | 0.01  | 0.12  | 0.5   | 0.01   |
| GAIF01021209.1 | 8.08  | 13.92 | 11.12 | 15.9  | 14.39 | 4.86   |
| GAIF01021210.1 | 0     | 0     | 0     | 0     | 0.32  | 0      |
| GAIF01021212.1 | 0.55  | 1     | 0.6   | 2.61  | 3.06  | 0.07   |
| GAIF01021213.1 | 0     | 0     | 0     | 0.17  | 0.18  | 0      |
| GAIF01021214.1 | 7.29  | 9.3   | 2.99  | 17.49 | 23.5  | 3.96   |
| GAIF01021216.1 | 0     | 0.07  | 0     | 0.31  | 2.74  | 0      |
| GAIF01021218.1 | 2.09  | 1.71  | 0     | 3.44  | 4.22  | 0.67   |
| GAIF01021219.1 | 3.66  | 5.88  | 4.57  | 6.18  | 4.8   | 1.28   |
| GAIF01021220.1 | 0.17  | 0.06  | 0.01  | 0     | 1.24  | 0      |
| GAIF01021221.1 | 6.45  | 2.42  | 3.19  | 18.8  | 31.01 | 16.78  |
| GAIF01021222.1 | 0.36  | 0.07  | 0     | 0.87  | 3.03  | 0.11   |
| GAIF01021223.1 | 0     | 0     | 0     | 0.04  | 0.25  | 0      |
| GAIF01021226.1 | 0     | 0     | 0     | 0     | 0.08  | 0      |
| GAIF01021229.1 | 0.1   | 0.07  | 0.04  | 0.79  | 5.05  | 0.04   |
| GAIF01021231.1 | 0.19  | 0     | 0     | 1.31  | 9.76  | 0.31   |
| GAIF01021232.1 | 0.29  | 0.51  | 0.34  | 0.91  | 0.43  | 0.05   |
| GAIF01021235.1 | 0     | 0.04  | 0     | 0     | 0.17  | 0      |
| GAIF01021236.1 | 0.35  | 0.51  | 0     | 0.41  | 0.7   | 0      |
| GAIF01021237.1 | 0.36  | 0.77  | 0.78  | 1.26  | 1.71  | 0.13   |
| GAIF01021238.1 | 6.5   | 0     | 0     | 3.14  | 16.4  | 3.32   |
| GAIF01021239.1 | 3.97  | 4.09  | 0.85  | 4.22  | 4.64  | 0.34   |
| GAIF01021240.1 | 0     | 0     | 0     | 0     | 0.14  | 0.04   |
| GAIF01021242.1 | 11.69 | 17.45 | 26.37 | 28.31 | 13.5  | 11.45  |
| GAIF01021243.1 | 0     | 0.08  | 0     | 0     | 0     | 0      |
| GAIF01021244.1 | 0.53  | 0.66  | 0     | 2.39  | 4.12  | 0.08   |
| GAIF01021246.1 | 2.49  | 0.12  | 0.12  | 10.3  | 41.99 | 23.93  |

|                |         |         |         |        |         |         |
|----------------|---------|---------|---------|--------|---------|---------|
| GAIF01021247.1 | 30.64   | 19.8    | 14.83   | 64.11  | 63.21   | 17.4    |
| GAIF01021249.1 | 0.37    | 0.07    | 0.07    | 0      | 0       | 0.14    |
| GAIF01021250.1 | 4.14    | 0.72    | 0.27    | 5.82   | 1.59    | 0       |
| GAIF01021252.1 | 0       | 0       | 0       | 0      | 0.1     | 0       |
| GAIF01021253.1 | 0.55    | 3.74    | 6.99    | 3.44   | 1.14    | 0.99    |
| GAIF01021254.1 | 6.04    | 0       | 0       | 0      | 0       | 6.11    |
| GAIF01021256.1 | 16.19   | 18.37   | 32.77   | 33.17  | 11.85   | 17.69   |
| GAIF01021257.1 | 0       | 0       | 0       | 0.13   | 0.09    | 0       |
| GAIF01021259.1 | 0       | 0       | 0       | 0      | 0.66    | 0       |
| GAIF01021260.1 | 0.04    | 0.08    | 0.04    | 0.17   | 3.01    | 0.24    |
| GAIF01021261.1 | 198.67  | 20.16   | 11.87   | 766.84 | 1133.84 | 2944.54 |
| GAIF01021263.1 | 2.03    | 0.19    | 0.13    | 7.68   | 28.54   | 0.53    |
| GAIF01021265.1 | 3.88    | 2.19    | 4.57    | 1.77   | 1.07    | 2.35    |
| GAIF01021266.1 | 5.72    | 6.94    | 15.86   | 24.31  | 10.64   | 9.22    |
| GAIF01021267.1 | 0.46    | 1       | 0.44    | 3.12   | 4.07    | 0.5     |
| GAIF01021268.1 | 0.08    | 0       | 0       | 0.31   | 2.34    | 0.03    |
| GAIF01021270.1 | 0.07    | 0.15    | 0.07    | 1.5    | 3.65    | 0       |
| GAIF01021272.1 | 722.26  | 767.35  | 1577.24 | 454.23 | 227.81  | 1074.39 |
| GAIF01021273.1 | 0.15    | 0       | 0       | 0.69   | 3.94    | 0.16    |
| GAIF01021274.1 | 0.04    | 0.18    | 0       | 1.05   | 5.8     | 0.09    |
| GAIF01021275.1 | 1057.94 | 3389.06 | 1105.28 | 303.8  | 717.67  | 534.57  |
| GAIF01021276.1 | 1.23    | 0.5     | 0.08    | 4.72   | 8.31    | 0.68    |
| GAIF01021277.1 | 15.99   | 14.17   | 11.38   | 16.85  | 17.92   | 6.86    |
| GAIF01021278.1 | 0       | 0.23    | 0       | 0      | 0.16    | 0.11    |
| GAIF01021282.1 | 0       | 0       | 0.07    | 0      | 0       | 0.15    |
| GAIF01021283.1 | 57.74   | 69.35   | 46.26   | 41.73  | 40.97   | 62.55   |
| GAIF01021284.1 | 0       | 0.25    | 0       | 0.13   | 0.27    | 0       |
| GAIF01021286.1 | 5.24    | 0.26    | 0.26    | 11.79  | 64.17   | 48.75   |
| GAIF01021287.1 | 85.69   | 48.51   | 75.16   | 157.7  | 73.14   | 269.94  |
| GAIF01021288.1 | 49.02   | 16.72   | 16.67   | 72.91  | 47.5    | 80.39   |
| GAIF01021289.1 | 0.16    | 0.13    | 0       | 0      | 0.29    | 0.04    |
| GAIF01021290.1 | 11.43   | 10.6    | 11.03   | 39.55  | 38.05   | 19.32   |
| GAIF01021291.1 | 60.78   | 42.55   | 17.28   | 4.77   | 4.4     | 8.36    |
| GAIF01021292.1 | 0       | 0       | 0       | 0.11   | 1.33    | 0.1     |
| GAIF01021296.1 | 497.79  | 550.21  | 835.97  | 594.8  | 495.79  | 899.18  |
| GAIF01021297.1 | 0       | 0.26    | 0       | 0.28   | 1.46    | 0       |
| GAIF01021298.1 | 0.33    | 0       | 0       | 0      | 0       | 0       |
| GAIF01021299.1 | 0       | 0       | 0       | 0.21   | 0.44    | 0       |
| GAIF01021300.1 | 0       | 0       | 0.07    | 0      | 0       | 0       |
| GAIF01021301.1 | 1.5     | 0.7     | 1.18    | 0      | 0.7     | 0.47    |
| GAIF01021302.1 | 24.19   | 19.28   | 21.74   | 22.82  | 12.63   | 12.21   |
| GAIF01021303.1 | 9.29    | 5.87    | 3.76    | 48.18  | 32.33   | 3.34    |
| GAIF01021304.1 | 0.35    | 0       | 0       | 0.57   | 0.27    | 0       |
| GAIF01021306.1 | 1.22    | 0.33    | 0.56    | 4.85   | 15.94   | 1.12    |

|                |       |       |       |       |       |       |
|----------------|-------|-------|-------|-------|-------|-------|
| GAIF01021307.1 | 29.13 | 11.25 | 17.13 | 42.98 | 40.99 | 78.73 |
| GAIF01021308.1 | 37.03 | 22.83 | 7.53  | 45.38 | 58.35 | 22.41 |
| GAIF01021310.1 | 44.75 | 30.98 | 9.96  | 46.89 | 39.5  | 6.39  |
| GAIF01021311.1 | 6.38  | 4.72  | 6.23  | 16.64 | 22.01 | 11.94 |
| GAIF01021313.1 | 0.44  | 0.36  | 0     | 3.06  | 5.28  | 0     |
| GAIF01021314.1 | 0.76  | 0.29  | 0.1   | 1.02  | 1.31  | 0.29  |
| GAIF01021316.1 | 0.07  | 0     | 0     | 0.04  | 0     | 0     |
| GAIF01021319.1 | 0.34  | 0.19  | 0     | 2.24  | 11.45 | 0.19  |
| GAIF01021320.1 | 30.05 | 72.6  | 42.33 | 65.55 | 59.02 | 5.78  |
| GAIF01021321.1 | 1.14  | 0.11  | 0     | 2.42  | 0.34  | 1.16  |
| GAIF01021324.1 | 0.25  | 0.53  | 0.4   | 0.28  | 0.3   | 0     |
| GAIF01021327.1 | 0.09  | 0.4   | 0.2   | 0.11  | 0.22  | 0.1   |
| GAIF01021328.1 | 0.57  | 0.21  | 0.28  | 2.81  | 5.67  | 0.91  |
| GAIF01021329.1 | 0     | 0     | 0     | 0.21  | 0.91  | 0     |
| GAIF01021330.1 | 0.39  | 0     | 0     | 0     | 0     | 0.14  |
| GAIF01021331.1 | 0     | 0     | 0     | 0.11  | 0.45  | 0     |
| GAIF01021332.1 | 0     | 0     | 0     | 0.06  | 8.06  | 0     |
| GAIF01021333.1 | 0.03  | 0     | 0.03  | 0     | 0     | 0     |
| GAIF01021334.1 | 13.58 | 9.2   | 11.17 | 20.64 | 22.54 | 7.97  |
| GAIF01021335.1 | 2.17  | 1.34  | 1.43  | 9.83  | 12.12 | 1.44  |
| GAIF01021336.1 | 0.28  | 1.68  | 0.62  | 0.33  | 1.18  | 0.31  |
| GAIF01021337.1 | 0.38  | 0.07  | 0     | 0.07  | 0.15  | 0     |
| GAIF01021338.1 | 11.03 | 7.96  | 4.65  | 0.58  | 1.13  | 0.25  |
| GAIF01021339.1 | 0.13  | 0.14  | 0     | 0     | 0.31  | 0     |
| GAIF01021341.1 | 0.06  | 0.03  | 0.06  | 0.71  | 2.54  | 0.06  |
| GAIF01021342.1 | 30.51 | 50.64 | 22.26 | 27.44 | 35.29 | 31.69 |
| GAIF01021343.1 | 0.18  | 0.43  | 0.1   | 0.08  | 0.48  | 0.1   |
| GAIF01021344.1 | 20.93 | 21.93 | 14.97 | 37.18 | 30.89 | 4.62  |
| GAIF01021345.1 | 13.32 | 5.38  | 5.05  | 22.08 | 24.25 | 4.99  |
| GAIF01021346.1 | 2.22  | 3.09  | 0.46  | 5.16  | 10.1  | 0.31  |
| GAIF01021347.1 | 18.15 | 13.93 | 16.73 | 10.79 | 13.78 | 5.94  |
| GAIF01021348.1 | 0     | 0     | 0.1   | 0     | 0     | 0     |
| GAIF01021349.1 | 0     | 0     | 0     | 0.44  | 0     | 0     |
| GAIF01021352.1 | 2.55  | 0.94  | 0.51  | 22.7  | 46.41 | 0.26  |
| GAIF01021353.1 | 1.01  | 0.56  | 0.3   | 14.12 | 91.94 | 1.56  |
| GAIF01021354.1 | 0.1   | 0     | 0     | 0     | 1.86  | 0     |
| GAIF01021355.1 | 0.12  | 0.39  | 0     | 0     | 0.29  | 0     |
| GAIF01021357.1 | 0.83  | 0.38  | 1.3   | 0.14  | 0     | 0.13  |
| GAIF01021358.1 | 7.9   | 0.78  | 0.64  | 23.24 | 25.43 | 50.23 |
| GAIF01021359.1 | 10.97 | 21.33 | 10.53 | 51.8  | 61.79 | 4.04  |
| GAIF01021361.1 | 4.67  | 4.9   | 3.55  | 21.86 | 37.15 | 35.26 |
| GAIF01021362.1 | 0.11  | 0.16  | 0     | 0     | 0.89  | 0.36  |
| GAIF01021363.1 | 4.35  | 6.02  | 5.11  | 17.42 | 23.59 | 3.14  |
| GAIF01021364.1 | 0.11  | 0.15  | 0.12  | 0.78  | 0.64  | 0.08  |

|                |         |         |         |        |         |        |
|----------------|---------|---------|---------|--------|---------|--------|
| GAIF01021365.1 | 2.11    | 3.66    | 1.39    | 1.3    | 1.35    | 0.46   |
| GAIF01021366.1 | 0.22    | 0.14    | 0.32    | 0.15   | 0.18    | 0      |
| GAIF01021367.1 | 0.27    | 0       | 0       | 0.16   | 0.32    | 0      |
| GAIF01021369.1 | 0.2     | 0.22    | 0.45    | 0      | 0       | 0.22   |
| GAIF01021370.1 | 1495.14 | 2724.94 | 1293.22 | 674.38 | 1137.92 | 1328.7 |
| GAIF01021372.1 | 0       | 7.03    | 13.76   | 0      | 0       | 4.07   |
| GAIF01021373.1 | 266.6   | 60.54   | 144.41  | 317.61 | 232.27  | 278.77 |
| GAIF01021374.1 | 3.3     | 6.22    | 4.58    | 3.83   | 2.02    | 0.96   |
| GAIF01021375.1 | 0.99    | 1.3     | 0.71    | 0.79   | 1.89    | 1.13   |
| GAIF01021376.1 | 0.16    | 0.5     | 0.69    | 0.78   | 1.34    | 0      |
| GAIF01021377.1 | 12.43   | 11.81   | 16.56   | 6.5    | 6.21    | 6.19   |
| GAIF01021378.1 | 0       | 0       | 1.73    | 0.7    | 0       | 0.91   |
| GAIF01021381.1 | 1.71    | 1.62    | 0.07    | 13.96  | 9.43    | 0.24   |
| GAIF01021383.1 | 0       | 0.1     | 0       | 0      | 0       | 0      |
| GAIF01021384.1 | 7.46    | 6.65    | 9.23    | 14.09  | 11.95   | 5.32   |
| GAIF01021385.1 | 5.46    | 4.1     | 1.59    | 29.85  | 52.98   | 2.93   |
| GAIF01021386.1 | 7.88    | 12.33   | 7.11    | 25.17  | 21.21   | 0      |
| GAIF01021387.1 | 0.88    | 0       | 0       | 5.33   | 10.5    | 21.34  |
| GAIF01021388.1 | 65.55   | 66.11   | 116.2   | 108.53 | 67.71   | 32.66  |
| GAIF01021389.1 | 36.47   | 48.07   | 53.3    | 58.25  | 44.21   | 24.1   |
| GAIF01021390.1 | 0.05    | 0       | 0       | 0      | 0.08    | 0      |
| GAIF01021391.1 | 23.64   | 1.71    | 1.89    | 28.84  | 61.52   | 82.94  |
| GAIF01021393.1 | 0.5     | 0.53    | 0       | 3.73   | 11.2    | 1.94   |
| GAIF01021394.1 | 1.97    | 1.25    | 0.62    | 1.16   | 1.53    | 0.3    |
| GAIF01021395.1 | 270.49  | 180.95  | 115.2   | 279.46 | 271.41  | 812.68 |
| GAIF01021396.1 | 25.98   | 16.7    | 6.25    | 3.42   | 1.46    | 0      |
| GAIF01021397.1 | 3.03    | 0.49    | 0.37    | 4.56   | 28.33   | 5.32   |
| GAIF01021398.1 | 1.51    | 0.22    | 0       | 0      | 0.24    | 0      |
| GAIF01021400.1 | 0       | 0       | 0       | 0.09   | 0.1     | 0      |
| GAIF01021401.1 | 0.03    | 0       | 0       | 0.08   | 0       | 0      |
| GAIF01021402.1 | 0       | 0       | 0       | 0.18   | 3.83    | 0.33   |
| GAIF01021403.1 | 0.06    | 0.28    | 0.08    | 0.26   | 0       | 0      |
| GAIF01021404.1 | 0       | 0       | 0       | 0.21   | 0.31    | 0      |
| GAIF01021405.1 | 0       | 0       | 0       | 0.03   | 0.19    | 0      |
| GAIF01021406.1 | 47.46   | 47.96   | 31      | 86.06  | 65.37   | 10.28  |
| GAIF01021407.1 | 6.73    | 5.57    | 12.47   | 4.4    | 4.6     | 0.83   |
| GAIF01021408.1 | 0.39    | 0       | 0       | 0.11   | 0.35    | 0      |
| GAIF01021412.1 | 2.72    | 1.79    | 0.11    | 4.05   | 10.74   | 0.43   |
| GAIF01021413.1 | 18.96   | 18.19   | 11.25   | 21.94  | 27.27   | 38.05  |
| GAIF01021414.1 | 0.05    | 0       | 0.17    | 0      | 0       | 0.06   |
| GAIF01021415.1 | 5.16    | 1.34    | 0.25    | 0.52   | 0       | 0      |
| GAIF01021416.1 | 3.79    | 0.35    | 0.2     | 1.04   | 4       | 0.39   |
| GAIF01021417.1 | 0.03    | 0       | 0       | 0      | 0       | 0      |
| GAIF01021418.1 | 3.41    | 14.67   | 0       | 18.91  | 16.55   | 0      |

|                |       |       |       |        |        |       |
|----------------|-------|-------|-------|--------|--------|-------|
| GAIF01021420.1 | 0.01  | 0.03  | 0.03  | 0.02   | 0.17   | 0     |
| GAIF01021422.1 | 10.13 | 13.46 | 8.94  | 12.86  | 6.69   | 1.28  |
| GAIF01021423.1 | 0.42  | 0     | 0.17  | 0.23   | 0      | 0.05  |
| GAIF01021424.1 | 0     | 0.05  | 0     | 0      | 0.41   | 0.1   |
| GAIF01021425.1 | 7.84  | 6.17  | 0.84  | 14.43  | 30.21  | 0.35  |
| GAIF01021426.1 | 0     | 0     | 0     | 0.27   | 0      | 0     |
| GAIF01021430.1 | 0.12  | 0.07  | 0.07  | 0.14   | 1.33   | 0     |
| GAIF01021431.1 | 12.99 | 10.05 | 2.24  | 27.22  | 32.66  | 0.58  |
| GAIF01021433.1 | 0.31  | 0     | 0     | 1.31   | 2.83   | 0     |
| GAIF01021434.1 | 0     | 0     | 0     | 0.27   | 1.85   | 0     |
| GAIF01021436.1 | 4.87  | 2.15  | 0.17  | 13.08  | 38.63  | 3.69  |
| GAIF01021437.1 | 17.31 | 27.08 | 31.25 | 29.86  | 15.39  | 11.39 |
| GAIF01021439.1 | 4.55  | 2.05  | 0.39  | 32.26  | 141.06 | 0     |
| GAIF01021440.1 | 0     | 0     | 0     | 0.23   | 1.92   | 0     |
| GAIF01021441.1 | 1.86  | 0     | 0     | 8.07   | 32.99  | 2.74  |
| GAIF01021442.1 | 3.09  | 2.82  | 4.2   | 0.12   | 0.7    | 0.23  |
| GAIF01021443.1 | 2.92  | 3.41  | 2.02  | 4.51   | 7.02   | 1.55  |
| GAIF01021444.1 | 0     | 0     | 0     | 0      | 0.31   | 0     |
| GAIF01021445.1 | 18.34 | 36.23 | 27.45 | 50.79  | 30.98  | 5.22  |
| GAIF01021446.1 | 15.57 | 12.87 | 14.81 | 17.59  | 12.69  | 4.2   |
| GAIF01021447.1 | 0.16  | 0     | 0     | 0      | 0      | 0     |
| GAIF01021449.1 | 1.4   | 1.34  | 0     | 2.26   | 5.29   | 1.88  |
| GAIF01021450.1 | 0.1   | 0.76  | 0.22  | 0.12   | 0.48   | 0     |
| GAIF01021451.1 | 6.83  | 10.2  | 6.59  | 19.88  | 27.31  | 1.29  |
| GAIF01021453.1 | 5.07  | 4.04  | 3.36  | 5.09   | 1.65   | 0.23  |
| GAIF01021454.1 | 1.85  | 0     | 0     | 2.05   | 0.78   | 1.33  |
| GAIF01021456.1 | 0     | 0     | 0     | 0      | 0.2    | 0     |
| GAIF01021457.1 | 0.32  | 1     | 0.26  | 2.42   | 5.59   | 0.18  |
| GAIF01021458.1 | 0     | 0.11  | 0.22  | 0.24   | 2.2    | 0     |
| GAIF01021459.1 | 5.5   | 0.5   | 0.38  | 15.17  | 70.73  | 47.5  |
| GAIF01021460.1 | 19.08 | 15.34 | 14.55 | 28.59  | 23.61  | 6     |
| GAIF01021461.1 | 0.14  | 0.61  | 0     | 0.33   | 2.53   | 0.62  |
| GAIF01021462.1 | 0     | 0.09  | 0.05  | 0      | 0      | 0.05  |
| GAIF01021463.1 | 0.3   | 0.33  | 0.05  | 0.58   | 2.71   | 0     |
| GAIF01021465.1 | 74.48 | 98.57 | 84.99 | 139.86 | 146.46 | 40.44 |
| GAIF01021471.1 | 0     | 0     | 0     | 0      | 0.89   | 0     |
| GAIF01021473.1 | 0.25  | 0     | 0     | 0.2    | 0      | 0     |
| GAIF01021476.1 | 0     | 0.07  | 0     | 0      | 0      | 0.2   |
| GAIF01021477.1 | 15.48 | 16.32 | 7.32  | 28.15  | 26.48  | 2.75  |
| GAIF01021478.1 | 9.59  | 3.82  | 3.13  | 0      | 16.21  | 0.1   |
| GAIF01021479.1 | 2.37  | 5.83  | 0.14  | 7.38   | 19.95  | 0     |
| GAIF01021481.1 | 0     | 0.29  | 0.44  | 0.31   | 3.69   | 0.59  |
| GAIF01021482.1 | 0     | 0.3   | 0     | 1.04   | 0      | 0     |
| GAIF01021483.1 | 0.26  | 0     | 0     | 0      | 0      | 0     |

|                |          |           |           |          |         |         |
|----------------|----------|-----------|-----------|----------|---------|---------|
| GAIF01021485.1 | 0.12     | 0         | 0         | 0        | 0       | 0       |
| GAIF01021486.1 | 0        | 0.03      | 0         | 0        | 0       | 0       |
| GAIF01021487.1 | 0        | 0.25      | 0.32      | 0        | 0.23    | 0       |
| GAIF01021488.1 | 0        | 0         | 0         | 0        | 0.37    | 0       |
| GAIF01021489.1 | 0.74     | 0         | 0         | 0.85     | 2.82    | 0       |
| GAIF01021491.1 | 0        | 0         | 0         | 0        | 0.33    | 0       |
| GAIF01021494.1 | 62.71    | 73.33     | 58.67     | 6.7      | 2.05    | 0.52    |
| GAIF01021496.1 | 0.09     | 0         | 0         | 0        | 0.65    | 0       |
| GAIF01021497.1 | 60.95    | 28.74     | 2.62      | 56.12    | 76.26   | 5.04    |
| GAIF01021499.1 | 0        | 0         | 0         | 0        | 0.07    | 0.14    |
| GAIF01021500.1 | 0        | 0         | 0         | 0        | 0.6     | 0       |
| GAIF01021501.1 | 1.22     | 0.31      | 0.19      | 0.52     | 0.42    | 0       |
| GAIF01021503.1 | 0.51     | 0.25      | 0.23      | 0        | 0       | 0       |
| GAIF01021504.1 | 0.79     | 0.1       | 0.06      | 3        | 10.55   | 0.05    |
| GAIF01021506.1 | 54207.21 | 185288.73 | 111235.87 | 65803.86 | 76743.3 | 16900.2 |
| GAIF01021507.1 | 0        | 0         | 0         | 0.44     | 2.52    | 0       |
| GAIF01021509.1 | 73.51    | 115.64    | 138.59    | 114.91   | 47.39   | 53.7    |
| GAIF01021510.1 | 13.54    | 13.56     | 6.44      | 30.26    | 30.17   | 4.95    |
| GAIF01021511.1 | 13.4     | 6.43      | 6.38      | 4.42     | 1.12    | 7.4     |
| GAIF01021512.1 | 60.54    | 93.72     | 23.03     | 3.43     | 22.67   | 18.98   |
| GAIF01021514.1 | 0.1      | 0         | 0         | 0        | 0.83    | 0       |
| GAIF01021515.1 | 0.02     | 0         | 0         | 0        | 0.16    | 0.05    |
| GAIF01021516.1 | 5.85     | 5.01      | 4.39      | 5.93     | 3       | 9.62    |
| GAIF01021518.1 | 1.23     | 1.34      | 1.69      | 1.34     | 0.83    | 0.34    |
| GAIF01021519.1 | 0        | 0         | 0         | 0        | 0.24    | 0       |
| GAIF01021520.1 | 44.41    | 34.76     | 9.95      | 68.39    | 79.3    | 8.16    |
| GAIF01021521.1 | 1.71     | 0         | 1.5       | 2.78     | 0.82    | 0.88    |
| GAIF01021523.1 | 0        | 0.19      | 0.38      | 0.2      | 0       | 0       |
| GAIF01021526.1 | 30.56    | 16.77     | 19.45     | 58.97    | 59.58   | 30.45   |
| GAIF01021528.1 | 0        | 0         | 0         | 0.13     | 0       | 0.12    |
| GAIF01021530.1 | 20.68    | 13.19     | 19.72     | 19.73    | 3.27    | 20.43   |
| GAIF01021532.1 | 0.02     | 0         | 0         | 0.14     | 1.01    | 0.07    |
| GAIF01021534.1 | 0.55     | 0.5       | 0.04      | 0.78     | 0.61    | 0.12    |
| GAIF01021536.1 | 91.8     | 116.32    | 71.98     | 123.48   | 97.09   | 25.54   |
| GAIF01021537.1 | 0.46     | 1.22      | 1.45      | 1.3      | 1.03    | 0.95    |
| GAIF01021540.1 | 0.17     | 0.18      | 0.06      | 0.13     | 0       | 0       |
| GAIF01021542.1 | 0.91     | 0.6       | 1.06      | 0.15     | 0.31    | 0.43    |
| GAIF01021543.1 | 0        | 0         | 0         | 0        | 0.37    | 0       |
| GAIF01021546.1 | 11.45    | 10.8      | 7.01      | 7.18     | 5       | 0.78    |
| GAIF01021547.1 | 0        | 2.83      | 1.11      | 4.48     | 3.19    | 0.31    |
| GAIF01021549.1 | 5.5      | 1.86      | 0.82      | 14.34    | 64.85   | 5.28    |
| GAIF01021550.1 | 4.18     | 2.7       | 1.67      | 0.13     | 0       | 0.06    |
| GAIF01021553.1 | 0        | 0         | 0         | 0.27     | 1.04    | 0       |
| GAIF01021556.1 | 0        | 0         | 0         | 0        | 0.1     | 0       |

|                |        |        |       |        |        |       |
|----------------|--------|--------|-------|--------|--------|-------|
| GAIF01021557.1 | 0.69   | 0.37   | 0.38  | 0.13   | 0.14   | 0     |
| GAIF01021559.1 | 13.46  | 16.87  | 21.3  | 42.38  | 20.4   | 16.26 |
| GAIF01021562.1 | 23.94  | 0      | 7.88  | 13.16  | 8.11   | 48.84 |
| GAIF01021563.1 | 4.13   | 2.58   | 0     | 0.58   | 0      | 0     |
| GAIF01021564.1 | 0      | 0      | 0.06  | 0      | 0      | 0     |
| GAIF01021565.1 | 1.27   | 0.9    | 2.02  | 0.6    | 0.35   | 0.68  |
| GAIF01021567.1 | 192.06 | 265.35 | 263.6 | 214.6  | 145.75 | 41.29 |
| GAIF01021568.1 | 0.52   | 0      | 0     | 4.8    | 13.45  | 0.21  |
| GAIF01021570.1 | 15.29  | 13.23  | 6.41  | 23.8   | 17.47  | 4.52  |
| GAIF01021571.1 | 3.15   | 1.22   | 0.45  | 0.59   | 0.37   | 0.11  |
| GAIF01021572.1 | 0      | 0      | 0     | 0      | 3.71   | 1.69  |
| GAIF01021573.1 | 4.38   | 0.32   | 1.08  | 5.45   | 5.12   | 19.18 |
| GAIF01021574.1 | 1.07   | 1.75   | 0.12  | 1.99   | 3.48   | 0.47  |
| GAIF01021576.1 | 2.06   | 0.3    | 0.22  | 6.84   | 16.72  | 0.65  |
| GAIF01021577.1 | 10.54  | 17.15  | 16.7  | 16.69  | 10.58  | 4.31  |
| GAIF01021578.1 | 0.68   | 0.96   | 0.67  | 2.51   | 5.04   | 0.22  |
| GAIF01021579.1 | 0      | 0      | 0     | 0.06   | 0.2    | 0     |
| GAIF01021580.1 | 89.9   | 56.7   | 50.36 | 105.14 | 107.49 | 51.31 |
| GAIF01021582.1 | 0      | 0      | 0     | 0      | 0.42   | 0.1   |
| GAIF01021584.1 | 0.59   | 0.15   | 0.25  | 1.43   | 7.31   | 0.05  |
| GAIF01021586.1 | 0.16   | 0.28   | 0.17  | 4.95   | 7.63   | 0.67  |
| GAIF01021587.1 | 0.44   | 0      | 0     | 0      | 0      | 0     |
| GAIF01021588.1 | 49.98  | 62.15  | 87.76 | 80.39  | 43.49  | 50.24 |
| GAIF01021591.1 | 1.46   | 1.72   | 1.36  | 1.05   | 1.08   | 0.5   |
| GAIF01021593.1 | 0.39   | 0.07   | 0.07  | 0.8    | 4.31   | 0.13  |
| GAIF01021595.1 | 0.06   | 0.13   | 0.2   | 1.1    | 1.47   | 0.07  |
| GAIF01021598.1 | 173.11 | 102.31 | 20.28 | 0      | 0.38   | 0     |
| GAIF01021600.1 | 21.97  | 9.82   | 7.27  | 30.96  | 61.94  | 15.65 |
| GAIF01021601.1 | 13.42  | 9.67   | 8.41  | 29.59  | 11.99  | 8.21  |
| GAIF01021602.1 | 0.31   | 0      | 0     | 1.02   | 1.26   | 0     |
| GAIF01021603.1 | 0      | 0      | 0.27  | 0      | 0      | 0     |
| GAIF01021604.1 | 26.25  | 15.3   | 7.08  | 38.55  | 42.34  | 10.9  |
| GAIF01021605.1 | 44.65  | 60.26  | 49.57 | 58.07  | 41.42  | 20.7  |
| GAIF01021606.1 | 0.74   | 0.72   | 0.45  | 1      | 1.77   | 0.16  |
| GAIF01021607.1 | 0.08   | 0      | 0.04  | 0.23   | 0.19   | 0     |
| GAIF01021608.1 | 0      | 0      | 0     | 0      | 0      | 0.04  |
| GAIF01021609.1 | 0.43   | 0.21   | 0.11  | 0.23   | 0.21   | 0.04  |
| GAIF01021610.1 | 14.89  | 13.44  | 7.04  | 13.16  | 18.45  | 7.5   |
| GAIF01021612.1 | 0      | 0.19   | 0     | 0      | 0      | 0     |
| GAIF01021613.1 | 28.12  | 17.85  | 3.09  | 138.5  | 203.25 | 3.15  |
| GAIF01021614.1 | 0      | 0.07   | 0     | 0.04   | 0.09   | 0     |
| GAIF01021615.1 | 5.19   | 5.67   | 2.67  | 12.82  | 17.31  | 1.52  |
| GAIF01021618.1 | 0.13   | 0.08   | 0.12  | 0.04   | 0      | 0.1   |
| GAIF01021619.1 | 6.88   | 14.63  | 18.5  | 22.89  | 21.87  | 10.19 |

|                |        |        |        |        |        |         |
|----------------|--------|--------|--------|--------|--------|---------|
| GAIF01021620.1 | 0.03   | 0      | 0      | 0      | 0      | 0       |
| GAIF01021621.1 | 0      | 0.03   | 0      | 0.02   | 0.03   | 0.06    |
| GAIF01021623.1 | 0      | 0      | 0      | 0      | 0.06   | 0       |
| GAIF01021624.1 | 0      | 0      | 0      | 0.11   | 0.25   | 0.06    |
| GAIF01021625.1 | 0.01   | 0      | 0.25   | 0      | 0      | 0       |
| GAIF01021626.1 | 0      | 0      | 0      | 0.24   | 0.09   | 0.04    |
| GAIF01021627.1 | 7.42   | 3.5    | 2.71   | 10.3   | 24.54  | 13.83   |
| GAIF01021628.1 | 56.3   | 39.12  | 26.75  | 10.25  | 10.78  | 9.88    |
| GAIF01021629.1 | 0.26   | 0      | 0      | 0.47   | 1.27   | 0.22    |
| GAIF01021630.1 | 37.7   | 20.73  | 13.76  | 38.37  | 51.61  | 40.09   |
| GAIF01021631.1 | 3.5    | 6.04   | 3.05   | 3.07   | 1.99   | 0.15    |
| GAIF01021632.1 | 0.66   | 0      | 0      | 0.61   | 0.42   | 0       |
| GAIF01021634.1 | 0      | 0      | 0      | 0      | 0.91   | 0       |
| GAIF01021635.1 | 118.31 | 163.42 | 104.06 | 146.78 | 112.81 | 19.47   |
| GAIF01021638.1 | 11.8   | 14.74  | 2.75   | 46.41  | 187.29 | 4.77    |
| GAIF01021639.1 | 0      | 0      | 0.08   | 0      | 0      | 0       |
| GAIF01021642.1 | 8.6    | 4.37   | 2.73   | 0.84   | 1.13   | 0.33    |
| GAIF01021644.1 | 0      | 0.92   | 0.46   | 0      | 0      | 0       |
| GAIF01021645.1 | 0      | 0      | 0.35   | 0.68   | 0.06   | 0       |
| GAIF01021646.1 | 8.78   | 7.69   | 18.62  | 9.39   | 7.17   | 9.08    |
| GAIF01021648.1 | 0      | 0      | 0      | 0.4    | 1.86   | 0       |
| GAIF01021649.1 | 0      | 0      | 0      | 0      | 0.64   | 0       |
| GAIF01021650.1 | 0.19   | 0.41   | 0      | 1.95   | 6.17   | 2.77    |
| GAIF01021651.1 | 18.71  | 19.05  | 11.15  | 7.86   | 5.09   | 3.08    |
| GAIF01021652.1 | 0.09   | 0      | 0      | 0.1    | 0.11   | 0       |
| GAIF01021653.1 | 32.17  | 34.85  | 31.17  | 87.83  | 99.87  | 12.76   |
| GAIF01021654.1 | 0.74   | 0      | 0      | 0.73   | 0      | 0       |
| GAIF01021655.1 | 0      | 0      | 0      | 0      | 0.07   | 0       |
| GAIF01021657.1 | 185.53 | 21.95  | 18.77  | 265.75 | 416.34 | 4458.63 |
| GAIF01021658.1 | 0.1    | 0.52   | 0.31   | 0.22   | 0.91   | 0       |
| GAIF01021659.1 | 5.81   | 7.75   | 6.06   | 3.3    | 5.15   | 5.2     |
| GAIF01021660.1 | 0.76   | 0.26   | 0.26   | 2.46   | 9.9    | 0.4     |
| GAIF01021661.1 | 0      | 0      | 0      | 0      | 0.41   | 0.35    |
| GAIF01021662.1 | 0      | 2.94   | 1.64   | 0      | 0      | 1.33    |
| GAIF01021663.1 | 0.31   | 0.85   | 0.51   | 0      | 0      | 0.17    |
| GAIF01021664.1 | 0      | 0.17   | 0      | 0.81   | 3.06   | 0       |
| GAIF01021665.1 | 48.38  | 3.14   | 0.81   | 4.9    | 22.37  | 4.15    |
| GAIF01021667.1 | 0      | 0.35   | 0      | 0      | 0.58   | 0       |
| GAIF01021668.1 | 0      | 0      | 0      | 0.24   | 0.13   | 0       |
| GAIF01021669.1 | 0.19   | 0      | 0      | 0.82   | 1.61   | 0       |
| GAIF01021670.1 | 19.35  | 18.6   | 17.49  | 46.15  | 37.6   | 11.05   |
| GAIF01021671.1 | 166.16 | 180.76 | 221.34 | 56.56  | 60.17  | 163.89  |
| GAIF01021673.1 | 0      | 0      | 0      | 0      | 1.13   | 0.26    |
| GAIF01021675.1 | 1.47   | 0.71   | 0.66   | 8.02   | 18.66  | 1.32    |



|                |        |        |        |        |        |        |
|----------------|--------|--------|--------|--------|--------|--------|
| GAIF01021676.1 | 46.69  | 75.48  | 58.68  | 40.46  | 29.18  | 17.43  |
| GAIF01021677.1 | 0.03   | 0.01   | 0      | 0      | 0.05   | 0      |
| GAIF01021678.1 | 0      | 0      | 0      | 70.01  | 0      | 0.14   |
| GAIF01021679.1 | 177.26 | 145.01 | 269.86 | 161.6  | 153.16 | 452.52 |
| GAIF01021680.1 | 61.1   | 34.71  | 52.33  | 49.75  | 37.57  | 15.39  |
| GAIF01021682.1 | 0.15   | 0.24   | 0      | 0.41   | 1.54   | 0.44   |
| GAIF01021684.1 | 16.37  | 25.64  | 57.21  | 14.26  | 23.35  | 8.68   |
| GAIF01021685.1 | 7.57   | 16.77  | 18.78  | 31.16  | 29.06  | 10.39  |
| GAIF01021686.1 | 22.83  | 33.07  | 15.98  | 59.49  | 66.14  | 5.19   |
| GAIF01021688.1 | 0      | 0.21   | 0.16   | 0.06   | 0.4    | 0.32   |
| GAIF01021689.1 | 0      | 0.86   | 0      | 0.18   | 0.98   | 0.42   |
| GAIF01021690.1 | 10.19  | 10.59  | 14.62  | 2.16   | 7.88   | 38.66  |
| GAIF01021692.1 | 0.43   | 0.16   | 0      | 2.46   | 24.58  | 0.11   |
| GAIF01021693.1 | 13.82  | 19.7   | 19.21  | 46.2   | 32.32  | 9.22   |
| GAIF01021694.1 | 1.18   | 0.95   | 1.41   | 0.31   | 1.07   | 0      |
| GAIF01021695.1 | 1.77   | 0.22   | 0.8    | 5.61   | 9.52   | 1.08   |
| GAIF01021697.1 | 299.45 | 326.33 | 281.75 | 135.86 | 114.53 | 218.32 |
| GAIF01021698.1 | 0.17   | 0      | 0      | 0      | 0.2    | 0.18   |
| GAIF01021699.1 | 0.21   | 0.08   | 0      | 0.65   | 1.42   | 0.08   |
| GAIF01021700.1 | 19.28  | 21.57  | 14.71  | 3.34   | 9.2    | 6.59   |
| GAIF01021701.1 | 0      | 1.98   | 0      | 0      | 0      | 0      |
| GAIF01021702.1 | 0.1    | 0.02   | 0.11   | 0.14   | 0.15   | 0.04   |
| GAIF01021703.1 | 0      | 0.85   | 1.82   | 0      | 0      | 0.11   |
| GAIF01021705.1 | 589.51 | 493.27 | 279.12 | 672.19 | 755.34 | 652.25 |
| GAIF01021706.1 | 0      | 0      | 0.19   | 0      | 0.1    | 0.1    |
| GAIF01021707.1 | 0.33   | 0.36   | 0.05   | 0.24   | 0.55   | 0      |
| GAIF01021708.1 | 1.39   | 3.67   | 0.22   | 2.87   | 5.15   | 0      |
| GAIF01021711.1 | 0.17   | 0      | 0      | 0.39   | 2.41   | 0      |
| GAIF01021712.1 | 1.23   | 0.18   | 0.06   | 5.6    | 19.91  | 8.66   |
| GAIF01021713.1 | 0      | 0      | 0      | 0      | 0.04   | 0      |
| GAIF01021716.1 | 10.97  | 17.7   | 7.92   | 54.6   | 34.38  | 2.71   |
| GAIF01021717.1 | 16.72  | 21.79  | 26.15  | 6.25   | 4.44   | 4.61   |
| GAIF01021718.1 | 0.06   | 0      | 0      | 0.29   | 1.35   | 0      |
| GAIF01021720.1 | 0      | 0      | 0.01   | 0      | 0      | 0      |
| GAIF01021722.1 | 0      | 0      | 0      | 0.27   | 1.51   | 0      |
| GAIF01021723.1 | 0.34   | 1.57   | 2.05   | 2.17   | 2.46   | 0.09   |
| GAIF01021724.1 | 0      | 0.14   | 0      | 0      | 0.08   | 0      |
| GAIF01021726.1 | 0.11   | 0.06   | 0      | 1.09   | 4.2    | 0.12   |
| GAIF01021727.1 | 100.18 | 79.23  | 37.24  | 101.82 | 91.68  | 25.15  |
| GAIF01021728.1 | 0      | 0      | 0      | 0.25   | 0      | 0.48   |
| GAIF01021729.1 | 0      | 0.11   | 0      | 0.36   | 1      | 0      |
| GAIF01021731.1 | 0.27   | 0      | 0      | 0      | 0      | 0      |
| GAIF01021733.1 | 0      | 0      | 0      | 0      | 2.02   | 0      |
| GAIF01021734.1 | 19.73  | 21.19  | 4.5    | 29.18  | 30.41  | 3.5    |

|                |       |        |       |       |       |       |
|----------------|-------|--------|-------|-------|-------|-------|
| GAIF01021735.1 | 0     | 0      | 0     | 0     | 0.01  | 0     |
| GAIF01021736.1 | 0     | 0      | 0     | 0.04  | 0.09  | 0     |
| GAIF01021737.1 | 4.52  | 7.3    | 2.4   | 16.09 | 22.81 | 0.8   |
| GAIF01021738.1 | 0.5   | 0.37   | 2.74  | 2.23  | 1.84  | 0.11  |
| GAIF01021739.1 | 19.48 | 9.35   | 12.62 | 15.67 | 25.68 | 12.64 |
| GAIF01021740.1 | 0.04  | 0      | 0     | 0     | 0     | 0     |
| GAIF01021742.1 | 2.19  | 1.65   | 1.66  | 5.67  | 5.06  | 2.23  |
| GAIF01021744.1 | 1.88  | 0.85   | 2.04  | 1.49  | 1.3   | 0.43  |
| GAIF01021746.1 | 0     | 0      | 0     | 0.21  | 0.65  | 0     |
| GAIF01021747.1 | 1.04  | 0.64   | 0.43  | 3.44  | 10.69 | 0.87  |
| GAIF01021748.1 | 0.1   | 0      | 0.06  | 0.06  | 0.55  | 0     |
| GAIF01021750.1 | 13.63 | 25.47  | 18.66 | 43.04 | 33.12 | 5.24  |
| GAIF01021752.1 | 0     | 0      | 0.02  | 0.09  | 1.18  | 0     |
| GAIF01021753.1 | 5.98  | 128.66 | 77.33 | 2.41  | 2.73  | 5.83  |
| GAIF01021755.1 | 0     | 0      | 0     | 0.23  | 0.42  | 0     |
| GAIF01021756.1 | 0     | 0.1    | 0     | 0     | 0     | 0.1   |
| GAIF01021757.1 | 0     | 5.34   | 5.15  | 0     | 0.13  | 0.37  |
| GAIF01021758.1 | 1.56  | 1.19   | 0.16  | 9.82  | 22.52 | 0.12  |
| GAIF01021759.1 | 0.21  | 0.19   | 0     | 2.38  | 8.06  | 0     |
| GAIF01021760.1 | 6.11  | 5.56   | 2.37  | 9.64  | 27.98 | 1.06  |
| GAIF01021761.1 | 0     | 1.18   | 1.34  | 0     | 0.16  | 2.54  |
| GAIF01021762.1 | 0.03  | 0.08   | 0.02  | 0.05  | 0.07  | 0     |
| GAIF01021763.1 | 2.86  | 6.64   | 0.86  | 9.05  | 7.97  | 0.57  |
| GAIF01021764.1 | 0     | 0      | 0     | 0     | 0.63  | 0     |
| GAIF01021765.1 | 3.32  | 4.94   | 0.69  | 3.48  | 0.78  | 1.38  |
| GAIF01021766.1 | 0     | 0      | 0     | 2.6   | 0.46  | 1.43  |
| GAIF01021768.1 | 1.26  | 1.44   | 0.92  | 2.68  | 1.6   | 2.16  |
| GAIF01021769.1 | 0     | 0      | 0     | 0     | 0.38  | 0.23  |
| GAIF01021771.1 | 0     | 0      | 0     | 0.01  | 0     | 0     |
| GAIF01021772.1 | 63.86 | 44.86  | 10.69 | 69.37 | 71.46 | 4.62  |
| GAIF01021773.1 | 0     | 0.08   | 0.08  | 0     | 0     | 0.31  |
| GAIF01021776.1 | 0.07  | 0.06   | 0     | 0.23  | 0.37  | 0.06  |
| GAIF01021777.1 | 3.52  | 0.33   | 0.16  | 12.82 | 49.83 | 9.08  |
| GAIF01021779.1 | 0     | 0      | 0     | 0.05  | 0     | 0     |
| GAIF01021781.1 | 0.2   | 0.17   | 0.1   | 0.52  | 1.54  | 0     |
| GAIF01021783.1 | 1.06  | 0.96   | 0.19  | 3.09  | 6.61  | 0.29  |
| GAIF01021784.1 | 0     | 0      | 0     | 0.12  | 0     | 0     |
| GAIF01021785.1 | 4.26  | 2.46   | 1.94  | 17.42 | 15.6  | 1.48  |
| GAIF01021786.1 | 0.11  | 0      | 0     | 0.23  | 0.44  | 0.15  |
| GAIF01021787.1 | 10.61 | 12.22  | 16.92 | 43.98 | 26.82 | 9.79  |
| GAIF01021788.1 | 29.51 | 36.82  | 32.31 | 76.13 | 55.13 | 14.72 |
| GAIF01021789.1 | 0     | 0.04   | 0     | 0     | 0.87  | 0     |
| GAIF01021790.1 | 0     | 0      | 0     | 0     | 0.12  | 0     |
| GAIF01021791.1 | 0.14  | 0      | 0.23  | 0.74  | 3.9   | 0.08  |

|                |        |       |       |        |        |        |
|----------------|--------|-------|-------|--------|--------|--------|
| GAIF01021792.1 | 0      | 0     | 0     | 0      | 0.79   | 0      |
| GAIF01021793.1 | 0.14   | 0.15  | 0.1   | 0      | 0.06   | 0      |
| GAIF01021795.1 | 35.6   | 23.83 | 29.23 | 82.3   | 43.52  | 71.18  |
| GAIF01021796.1 | 3.87   | 2.9   | 4.13  | 0.95   | 0.72   | 0.84   |
| GAIF01021797.1 | 0.33   | 0.5   | 0.22  | 3.1    | 4.8    | 0.07   |
| GAIF01021798.1 | 99.38  | 89.25 | 84.92 | 227.71 | 155.11 | 91.53  |
| GAIF01021799.1 | 0      | 0     | 0.29  | 0      | 0      | 0      |
| GAIF01021800.1 | 0      | 0.44  | 0.24  | 0      | 0.05   | 0.15   |
| GAIF01021801.1 | 0.2    | 0     | 0.37  | 0      | 0.44   | 0.46   |
| GAIF01021803.1 | 0.07   | 0.08  | 0     | 0      | 0.2    | 0      |
| GAIF01021805.1 | 0      | 0     | 0     | 0      | 0.05   | 0.05   |
| GAIF01021807.1 | 0.08   | 0     | 0.78  | 0.18   | 0.34   | 0      |
| GAIF01021808.1 | 3.09   | 0.69  | 1.91  | 5.61   | 6.06   | 6.1    |
| GAIF01021811.1 | 0      | 0.06  | 0     | 0.06   | 0      | 0      |
| GAIF01021812.1 | 0      | 0     | 0     | 0.03   | 0      | 0.03   |
| GAIF01021814.1 | 0.92   | 0.23  | 0     | 3.2    | 11.59  | 1.32   |
| GAIF01021815.1 | 0.27   | 0.48  | 0.1   | 3.3    | 5.93   | 0      |
| GAIF01021816.1 | 0.11   | 0     | 0     | 0.39   | 2.02   | 0      |
| GAIF01021817.1 | 0      | 0     | 0     | 0      | 0.24   | 0      |
| GAIF01021818.1 | 0      | 0     | 0     | 0.36   | 3.24   | 0.11   |
| GAIF01021821.1 | 0.89   | 0.85  | 0.85  | 3.87   | 8.43   | 0      |
| GAIF01021822.1 | 0      | 0     | 0     | 0      | 0.28   | 0      |
| GAIF01021823.1 | 5.6    | 0.48  | 0.07  | 0.42   | 2.75   | 0.37   |
| GAIF01021824.1 | 0.44   | 0.38  | 0.3   | 1.45   | 7.34   | 3.06   |
| GAIF01021825.1 | 0      | 0.69  | 0     | 0.48   | 0.74   | 0      |
| GAIF01021826.1 | 60.69  | 56.2  | 50.85 | 82.42  | 43.5   | 11.94  |
| GAIF01021827.1 | 0.54   | 0     | 0     | 0.5    | 0.13   | 0      |
| GAIF01021828.1 | 43.47  | 46.1  | 16.17 | 17.16  | 11.33  | 2.96   |
| GAIF01021830.1 | 0      | 91.8  | 55.97 | 0.11   | 1.14   | 3.34   |
| GAIF01021831.1 | 0.07   | 0.04  | 0     | 0.04   | 0.12   | 0      |
| GAIF01021832.1 | 0      | 0     | 0.06  | 0.03   | 0.59   | 0      |
| GAIF01021834.1 | 5.63   | 8.62  | 6.35  | 27.66  | 31.12  | 6.17   |
| GAIF01021835.1 | 0.15   | 0.39  | 0.11  | 1.37   | 3.2    | 0.06   |
| GAIF01021836.1 | 0      | 0     | 0.06  | 0      | 0      | 0      |
| GAIF01021837.1 | 7.84   | 15.47 | 20.65 | 18.88  | 17.92  | 6.91   |
| GAIF01021838.1 | 0      | 0     | 0.2   | 0      | 0      | 0.1    |
| GAIF01021840.1 | 0.52   | 0.89  | 0.35  | 0      | 0.1    | 0.53   |
| GAIF01021841.1 | 0      | 0     | 0.18  | 0      | 0      | 0.09   |
| GAIF01021843.1 | 9.8    | 7.58  | 6.01  | 23.95  | 17.13  | 6.19   |
| GAIF01021844.1 | 0      | 0.21  | 0.32  | 0.38   | 0.21   | 0      |
| GAIF01021846.1 | 125.47 | 65.05 | 121.8 | 158.31 | 122.97 | 109.73 |
| GAIF01021847.1 | 0      | 0     | 0     | 0      | 0.11   | 0      |
| GAIF01021848.1 | 0.1    | 0.21  | 0     | 0.22   | 0.11   | 0      |
| GAIF01021849.1 | 0.74   | 0.23  | 0.12  | 2.34   | 14.06  | 0.35   |

|                |       |        |        |        |        |       |
|----------------|-------|--------|--------|--------|--------|-------|
| GAIF01021850.1 | 0     | 0.56   | 0.6    | 0      | 0      | 0     |
| GAIF01021852.1 | 0.03  | 0.06   | 0.03   | 0      | 0.03   | 0     |
| GAIF01021853.1 | 6.96  | 6.91   | 7.91   | 26     | 10.56  | 22.38 |
| GAIF01021854.1 | 8.76  | 1.78   | 4.3    | 11.74  | 24.65  | 74.2  |
| GAIF01021855.1 | 44.05 | 39.6   | 8.25   | 18.13  | 47.41  | 0.23  |
| GAIF01021856.1 | 0.19  | 0.39   | 0      | 2.74   | 2.5    | 0.91  |
| GAIF01021857.1 | 3.86  | 4.95   | 1.12   | 6.88   | 13.06  | 1.78  |
| GAIF01021858.1 | 0.05  | 0.04   | 0      | 0.49   | 3.11   | 0     |
| GAIF01021859.1 | 0.45  | 0.1    | 0      | 2.15   | 6.97   | 0.1   |
| GAIF01021860.1 | 2.08  | 2.43   | 0      | 0      | 1.39   | 0     |
| GAIF01021861.1 | 1.17  | 0      | 0      | 1.04   | 7.92   | 0     |
| GAIF01021862.1 | 0.5   | 0.5    | 0.85   | 0.27   | 0      | 0.2   |
| GAIF01021863.1 | 0     | 0.18   | 0      | 2.09   | 13.51  | 0     |
| GAIF01021864.1 | 0     | 0.09   | 0.46   | 0      | 0      | 0     |
| GAIF01021865.1 | 169.7 | 160.85 | 246.85 | 162.93 | 102.49 | 90.66 |
| GAIF01021870.1 | 12.12 | 12.43  | 1.17   | 29.25  | 34.83  | 23.28 |
| GAIF01021871.1 | 0.24  | 0.64   | 0.19   | 0.24   | 0.32   | 0.15  |
| GAIF01021872.1 | 5.26  | 2.71   | 4.14   | 3.87   | 4.25   | 7.59  |
| GAIF01021873.1 | 1.49  | 0.59   | 0      | 5.48   | 8.6    | 0.6   |
| GAIF01021874.1 | 26.36 | 36.62  | 34.62  | 25.43  | 14.26  | 37.82 |
| GAIF01021876.1 | 0.13  | 0.14   | 0      | 0      | 0.45   | 0     |
| GAIF01021878.1 | 0     | 0.13   | 0      | 0.28   | 0.88   | 0     |
| GAIF01021881.1 | 0     | 7.8    | 10.29  | 0      | 0.11   | 0.74  |
| GAIF01021882.1 | 0     | 0      | 0      | 0.45   | 0.98   | 0     |
| GAIF01021883.1 | 0     | 0.1    | 0      | 0      | 0.22   | 0.1   |
| GAIF01021884.1 | 0     | 28.51  | 0      | 0      | 0      | 0     |
| GAIF01021885.1 | 0.13  | 0      | 0      | 1.61   | 6.81   | 0.14  |
| GAIF01021886.1 | 0.25  | 0      | 0      | 0.64   | 1.04   | 0     |
| GAIF01021887.1 | 1.15  | 0.39   | 0      | 2.89   | 3.42   | 0     |
| GAIF01021888.1 | 0.22  | 0.3    | 0.3    | 0.75   | 1.06   | 0     |
| GAIF01021889.1 | 30.69 | 15     | 27.23  | 32.59  | 10.79  | 11.27 |
| GAIF01021890.1 | 0.72  | 0      | 0      | 1.2    | 0.62   | 0.34  |
| GAIF01021891.1 | 11.71 | 13.69  | 16.73  | 28.44  | 13.25  | 7.48  |
| GAIF01021892.1 | 0     | 0      | 0      | 0      | 0.57   | 0     |
| GAIF01021893.1 | 16.47 | 15.6   | 5.15   | 31.35  | 34.86  | 5.33  |
| GAIF01021894.1 | 0.09  | 0      | 0      | 0      | 0      | 0     |
| GAIF01021895.1 | 0     | 0.05   | 0      | 0.28   | 1.29   | 0     |
| GAIF01021897.1 | 0.15  | 0      | 0.08   | 0      | 0      | 0     |
| GAIF01021898.1 | 2.3   | 2.61   | 0      | 11.1   | 16.77  | 0.3   |
| GAIF01021899.1 | 0.2   | 0      | 0      | 0.69   | 1.68   | 0.44  |
| GAIF01021900.1 | 20.66 | 12.02  | 6.95   | 52.41  | 35.01  | 17.31 |
| GAIF01021901.1 | 0     | 0      | 0      | 0      | 0.37   | 0     |
| GAIF01021903.1 | 0     | 0      | 0      | 0.48   | 2.17   | 0     |
| GAIF01021904.1 | 4.12  | 1.63   | 0.26   | 31.33  | 81.93  | 0.52  |

|                |       |        |        |        |        |        |
|----------------|-------|--------|--------|--------|--------|--------|
| GAIF01021910.1 | 1.42  | 0.91   | 2.02   | 2.61   | 2.21   | 1.38   |
| GAIF01021912.1 | 30.34 | 18.03  | 30.5   | 46.36  | 25.75  | 42.55  |
| GAIF01021913.1 | 5.05  | 3.43   | 3.15   | 3.86   | 4.16   | 0      |
| GAIF01021914.1 | 40.33 | 59.41  | 19.73  | 68.89  | 107.03 | 28.18  |
| GAIF01021916.1 | 0.25  | 0      | 0      | 0      | 0.93   | 0      |
| GAIF01021917.1 | 2.91  | 0      | 0      | 6.27   | 14.27  | 3.92   |
| GAIF01021918.1 | 37.45 | 56.01  | 47.11  | 95.39  | 76.28  | 18.34  |
| GAIF01021920.1 | 0.83  | 0.18   | 0.27   | 6.07   | 18.95  | 0.5    |
| GAIF01021922.1 | 98.97 | 161.71 | 226.27 | 163.29 | 176.32 | 105.45 |
| GAIF01021923.1 | 2.78  | 8.1    | 0.97   | 8.57   | 19.26  | 0.91   |
| GAIF01021924.1 | 72.92 | 35.54  | 55.96  | 160.77 | 175.53 | 149.93 |
| GAIF01021925.1 | 5.43  | 2.42   | 1.51   | 20.75  | 26.78  | 1.4    |
| GAIF01021926.1 | 0.67  | 1.65   | 0      | 0.78   | 3.04   | 0      |
| GAIF01021928.1 | 0     | 0      | 0      | 0.59   | 0      | 0      |
| GAIF01021932.1 | 9.77  | 18.57  | 13.22  | 35.36  | 32.48  | 3.02   |
| GAIF01021933.1 | 58.09 | 38.73  | 48.05  | 68.9   | 59.12  | 89.32  |
| GAIF01021935.1 | 3.05  | 0.91   | 0.84   | 13.01  | 35.43  | 26.38  |
| GAIF01021936.1 | 0     | 0      | 0      | 0.24   | 1.1    | 0      |
| GAIF01021938.1 | 0.11  | 0      | 0      | 0.38   | 0.39   | 0.36   |
| GAIF01021939.1 | 0     | 0      | 0      | 0      | 0.05   | 0      |
| GAIF01021940.1 | 1.69  | 1.42   | 1.09   | 2.76   | 1.29   | 0.76   |
| GAIF01021941.1 | 0.78  | 0.21   | 0.05   | 1.58   | 3.22   | 0      |
| GAIF01021942.1 | 0     | 0      | 0      | 1.7    | 7.03   | 0.11   |
| GAIF01021943.1 | 0     | 0      | 0.25   | 0      | 0.14   | 0      |
| GAIF01021944.1 | 2.35  | 2.37   | 1.09   | 7.86   | 16.43  | 11.39  |
| GAIF01021945.1 | 0     | 0      | 0      | 0      | 0.42   | 0      |
| GAIF01021946.1 | 0.47  | 0      | 0      | 0.45   | 0.79   | 0      |
| GAIF01021947.1 | 0.17  | 0.05   | 0.09   | 1      | 4.52   | 0.19   |
| GAIF01021949.1 | 2.02  | 7.66   | 3.8    | 4.71   | 0.82   | 3.39   |
| GAIF01021951.1 | 1.76  | 0      | 1.37   | 0.54   | 0      | 1.67   |
| GAIF01021952.1 | 8.38  | 11.35  | 4.39   | 13.12  | 15.19  | 0.99   |
| GAIF01021953.1 | 0.71  | 0      | 0.2    | 0.14   | 0.26   | 0      |
| GAIF01021954.1 | 0.07  | 0      | 0      | 0.44   | 1.17   | 0      |
| GAIF01021955.1 | 0     | 0.14   | 0      | 0      | 1.32   | 0.07   |
| GAIF01021957.1 | 0.12  | 0      | 0      | 0.81   | 6.15   | 0.13   |
| GAIF01021958.1 | 1.04  | 0      | 0.33   | 4.46   | 1.34   | 0      |
| GAIF01021959.1 | 0     | 0      | 0.28   | 0      | 0      | 0      |
| GAIF01021960.1 | 0     | 0.03   | 0      | 0      | 0.08   | 0.28   |
| GAIF01021966.1 | 13.63 | 3.43   | 3.25   | 92.35  | 86.83  | 12.75  |
| GAIF01021967.1 | 1.47  | 0.71   | 0.27   | 6.34   | 14.7   | 0.18   |
| GAIF01021968.1 | 0     | 0.82   | 0      | 0      | 0      | 0.82   |
| GAIF01021970.1 | 6.66  | 5.11   | 1.82   | 0.98   | 1.4    | 0.05   |
| GAIF01021971.1 | 0.06  | 0.09   | 0      | 1.16   | 7.26   | 0      |
| GAIF01021972.1 | 1.98  | 0.57   | 0.11   | 0.97   | 0.5    | 0.58   |

|                |         |        |        |         |         |         |
|----------------|---------|--------|--------|---------|---------|---------|
| GAIF01021973.1 | 0       | 0      | 0      | 0.12    | 0.45    | 0       |
| GAIF01021974.1 | 8.22    | 10.64  | 6.33   | 36.42   | 28.06   | 7.28    |
| GAIF01021975.1 | 0.15    | 0.54   | 0.46   | 0.28    | 0.31    | 0.04    |
| GAIF01021976.1 | 0       | 0      | 0      | 4.07    | 13.02   | 0.36    |
| GAIF01021977.1 | 1.05    | 0.3    | 0.23   | 2.59    | 2.56    | 0.04    |
| GAIF01021978.1 | 0       | 0.13   | 0      | 0       | 0       | 0       |
| GAIF01021979.1 | 0.12    | 0.54   | 0      | 0.14    | 0.74    | 0       |
| GAIF01021980.1 | 0       | 0      | 0      | 0       | 1.05    | 0       |
| GAIF01021982.1 | 9.31    | 5.25   | 7.87   | 9.37    | 3.13    | 3.16    |
| GAIF01021983.1 | 7.4     | 3.91   | 4.03   | 23      | 11.83   | 2.06    |
| GAIF01021984.1 | 13.32   | 18.17  | 9.61   | 1.56    | 2.7     | 0.87    |
| GAIF01021985.1 | 0.22    | 0.12   | 0.24   | 3.24    | 1.45    | 0.12    |
| GAIF01021986.1 | 40.4    | 42.97  | 25.79  | 49.96   | 44      | 6.52    |
| GAIF01021987.1 | 0.3     | 0.16   | 0      | 0.17    | 0.54    | 0       |
| GAIF01021988.1 | 0       | 0.11   | 0.22   | 0.56    | 0.58    | 0       |
| GAIF01021989.1 | 0.61    | 0.16   | 0.17   | 1.06    | 0.64    | 0.08    |
| GAIF01021991.1 | 0       | 0      | 6.81   | 0       | 0       | 0       |
| GAIF01021992.1 | 0.14    | 0      | 0.15   | 0       | 3.84    | 0.15    |
| GAIF01021993.1 | 0       | 0      | 0      | 0       | 1.12    | 0       |
| GAIF01021994.1 | 15.92   | 15.13  | 10.31  | 22.7    | 24.84   | 17.78   |
| GAIF01021997.1 | 0.6     | 1.69   | 1.71   | 0.37    | 0.34    | 0.7     |
| GAIF01021998.1 | 8.71    | 6.49   | 0      | 13.94   | 9.43    | 2.15    |
| GAIF01021999.1 | 0.13    | 0      | 0      | 1.29    | 15.43   | 0       |
| GAIF01022000.1 | 0.2     | 0      | 0.07   | 0.77    | 3.81    | 0.15    |
| GAIF01022001.1 | 0.48    | 0.78   | 0.53   | 0.09    | 0.58    | 0.26    |
| GAIF01022002.1 | 1064.92 | 517.14 | 401.07 | 2353.72 | 3403.66 | 8398.98 |
| GAIF01022003.1 | 2.63    | 1.82   | 0      | 6.39    | 12.51   | 0.53    |
| GAIF01022004.1 | 2.19    | 0.43   | 0.04   | 11.05   | 43.64   | 0.09    |
| GAIF01022005.1 | 0.29    | 0.12   | 0.14   | 1.97    | 8.08    | 0.1     |
| GAIF01022006.1 | 0.04    | 0      | 0.03   | 0       | 0       | 0.03    |
| GAIF01022007.1 | 77.19   | 19.69  | 37.37  | 115.61  | 32.19   | 58.91   |
| GAIF01022008.1 | 71.68   | 71.56  | 33.14  | 139.65  | 119.76  | 15.17   |
| GAIF01022010.1 | 0       | 0      | 0      | 0.13    | 0.41    | 0       |
| GAIF01022011.1 | 0       | 0.23   | 0      | 0.37    | 0.49    | 0.28    |
| GAIF01022012.1 | 0       | 0      | 0      | 0.19    | 0.53    | 0       |
| GAIF01022014.1 | 116.48  | 240.24 | 222.97 | 188.22  | 139.01  | 38.97   |
| GAIF01022015.1 | 0.17    | 0.06   | 0      | 0.81    | 6.07    | 0.07    |
| GAIF01022016.1 | 45.18   | 59.52  | 36.35  | 23.67   | 17.24   | 0       |
| GAIF01022017.1 | 0       | 0.06   | 0      | 0       | 0       | 0       |
| GAIF01022020.1 | 0       | 0      | 0      | 0       | 1.31    | 0       |
| GAIF01022021.1 | 37.62   | 10.52  | 10.34  | 37.34   | 47.33   | 0       |
| GAIF01022022.1 | 3.85    | 4.84   | 5.95   | 0.14    | 0.43    | 0.13    |
| GAIF01022024.1 | 0.03    | 0      | 0      | 0.33    | 1.51    | 0.1     |
| GAIF01022026.1 | 0.15    | 0      | 0      | 0       | 0.3     | 0.06    |

|                |         |         |         |         |         |         |
|----------------|---------|---------|---------|---------|---------|---------|
| GAIF01022027.1 | 0.74    | 0       | 0       | 0       | 0       | 0       |
| GAIF01022030.1 | 26.63   | 27.64   | 24.93   | 38.62   | 32.75   | 7.39    |
| GAIF01022031.1 | 0       | 0       | 0       | 0       | 0.14    | 0.07    |
| GAIF01022033.1 | 11.82   | 14.87   | 13.09   | 61.48   | 39.87   | 2.58    |
| GAIF01022034.1 | 0.24    | 0       | 0       | 0.28    | 0.48    | 0       |
| GAIF01022035.1 | 147.74  | 114.21  | 159.16  | 43.86   | 25.3    | 53.25   |
| GAIF01022036.1 | 35.38   | 24.51   | 23.26   | 55.36   | 39.41   | 14.03   |
| GAIF01022037.1 | 0.48    | 0       | 0       | 0       | 0.06    | 0       |
| GAIF01022039.1 | 1.62    | 0.92    | 0.36    | 13.87   | 41.01   | 1.07    |
| GAIF01022040.1 | 1.1     | 0       | 0.98    | 3.44    | 5.09    | 0.74    |
| GAIF01022041.1 | 2735.62 | 2089.35 | 1830.52 | 1768.03 | 1589.07 | 3606.97 |
| GAIF01022043.1 | 0       | 0       | 0       | 0       | 0.21    | 0       |
| GAIF01022044.1 | 1.87    | 2.2     | 0.4     | 7.99    | 10.7    | 0.83    |
| GAIF01022045.1 | 11.8    | 11.94   | 6.21    | 41.41   | 23.7    | 7.14    |
| GAIF01022046.1 | 0       | 0.12    | 0.24    | 0.25    | 0       | 0       |
| GAIF01022048.1 | 24.48   | 28.47   | 15.17   | 36.05   | 44.53   | 2.89    |
| GAIF01022049.1 | 0       | 0       | 0       | 0       | 1.31    | 0       |
| GAIF01022050.1 | 0.45    | 0.41    | 0.33    | 1.66    | 1.18    | 1       |
| GAIF01022052.1 | 0       | 0       | 0.25    | 0       | 0       | 0.08    |
| GAIF01022053.1 | 0.12    | 0       | 0       | 0       | 0.22    | 0.13    |
| GAIF01022054.1 | 41.06   | 31.87   | 6.71    | 24.47   | 50.69   | 0       |
| GAIF01022055.1 | 2.97    | 2.06    | 0.58    | 13.28   | 10.95   | 0.73    |
| GAIF01022056.1 | 12.19   | 24.77   | 13.49   | 13.91   | 10.78   | 3.14    |
| GAIF01022057.1 | 0       | 0       | 0.13    | 0       | 0       | 0       |
| GAIF01022059.1 | 0       | 0.03    | 0       | 0.03    | 0.1     | 0       |
| GAIF01022060.1 | 16.36   | 23.47   | 23.91   | 34.83   | 14.85   | 12.17   |
| GAIF01022061.1 | 0.52    | 0.32    | 0.81    | 0.94    | 1.51    | 0.24    |
| GAIF01022062.1 | 17.37   | 16      | 27.08   | 60.33   | 31.42   | 24.11   |
| GAIF01022064.1 | 22.07   | 15.41   | 20.02   | 51.37   | 46.94   | 41.35   |
| GAIF01022065.1 | 439.41  | 629.52  | 1164.71 | 191.71  | 128.98  | 376.8   |
| GAIF01022066.1 | 446.97  | 398.05  | 954.64  | 222.36  | 154.37  | 583.63  |
| GAIF01022067.1 | 0       | 1.55    | 2.28    | 0       | 0       | 0.64    |
| GAIF01022068.1 | 18.47   | 30.18   | 5.21    | 49.28   | 89.79   | 1.82    |
| GAIF01022069.1 | 0       | 0       | 0       | 0.11    | 0       | 0       |
| GAIF01022070.1 | 0       | 0       | 0.05    | 0.28    | 0.7     | 0.05    |
| GAIF01022071.1 | 0.28    | 0.43    | 0       | 0.39    | 0.34    | 0       |
| GAIF01022072.1 | 1.31    | 0.16    | 0       | 5.81    | 26.91   | 0.32    |
| GAIF01022073.1 | 0       | 0       | 0       | 0       | 0.18    | 0       |
| GAIF01022076.1 | 2.86    | 1.37    | 1.71    | 19.71   | 47.82   | 1.98    |
| GAIF01022080.1 | 6.01    | 0       | 2.05    | 11.88   | 3.68    | 18.92   |
| GAIF01022081.1 | 0.12    | 0       | 0       | 2.28    | 5.56    | 0.25    |
| GAIF01022082.1 | 0       | 2.05    | 0.58    | 0       | 0       | 0.66    |
| GAIF01022083.1 | 0.37    | 0.1     | 0.25    | 1.61    | 4.41    | 0.2     |
| GAIF01022085.1 | 8.77    | 6.93    | 6.59    | 18.91   | 25.81   | 23.82   |

|                |        |        |        |        |       |       |
|----------------|--------|--------|--------|--------|-------|-------|
| GAIF01022089.1 | 0      | 1.17   | 0      | 0      | 0     | 0     |
| GAIF01022090.1 | 0      | 0      | 0      | 0      | 0.06  | 0     |
| GAIF01022091.1 | 0.25   | 0      | 0.27   | 1.3    | 3.88  | 0.14  |
| GAIF01022092.1 | 0      | 0      | 0      | 0      | 0     | 0.6   |
| GAIF01022093.1 | 30.95  | 29.15  | 61.65  | 123.03 | 86.84 | 57.66 |
| GAIF01022095.1 | 0.05   | 0      | 0      | 0.35   | 1.95  | 0     |
| GAIF01022096.1 | 0      | 0      | 0      | 0.12   | 0.26  | 0     |
| GAIF01022097.1 | 0      | 0.18   | 0      | 0.09   | 0.59  | 0     |
| GAIF01022098.1 | 33.71  | 39.8   | 22.1   | 12.68  | 8.58  | 8.8   |
| GAIF01022099.1 | 0      | 0.8    | 0.87   | 0      | 0.99  | 0.76  |
| GAIF01022100.1 | 0.49   | 0.07   | 0      | 1.29   | 8.16  | 1.88  |
| GAIF01022101.1 | 0.81   | 0.29   | 0      | 0      | 0     | 0     |
| GAIF01022103.1 | 2.44   | 2.78   | 1.47   | 19.23  | 20.8  | 0.54  |
| GAIF01022104.1 | 0.07   | 0.32   | 0.25   | 0.17   | 0     | 0     |
| GAIF01022105.1 | 95.89  | 64.45  | 59.95  | 51.32  | 19.61 | 44.75 |
| GAIF01022109.1 | 0.26   | 0.57   | 0.4    | 0.61   | 0.38  | 0     |
| GAIF01022110.1 | 0      | 0      | 0      | 0.04   | 0.09  | 0     |
| GAIF01022111.1 | 0.1    | 0      | 0      | 1.55   | 2.75  | 0     |
| GAIF01022112.1 | 0      | 0      | 0.13   | 0      | 0     | 0     |
| GAIF01022113.1 | 6.05   | 5.81   | 3.8    | 3.68   | 2.46  | 0.46  |
| GAIF01022114.1 | 0      | 0.12   | 0.13   | 0.4    | 3.45  | 0.13  |
| GAIF01022116.1 | 7.87   | 0      | 0.47   | 0.05   | 0     | 0     |
| GAIF01022117.1 | 0      | 0      | 0      | 0      | 0.67  | 0     |
| GAIF01022118.1 | 0      | 0      | 0.23   | 0      | 0.14  | 0     |
| GAIF01022120.1 | 4.68   | 11.38  | 17.67  | 0      | 14.19 | 6.53  |
| GAIF01022121.1 | 37.7   | 25.76  | 15.35  | 1.32   | 0.81  | 1.18  |
| GAIF01022124.1 | 0      | 0      | 0      | 0      | 0     | 0.14  |
| GAIF01022125.1 | 4.15   | 11.86  | 7.16   | 8.65   | 8.97  | 0.51  |
| GAIF01022126.1 | 512.88 | 700.89 | 400.75 | 37.21  | 38.37 | 50.91 |
| GAIF01022128.1 | 0.81   | 1.98   | 0.89   | 0.47   | 0.12  | 0     |
| GAIF01022129.1 | 0.82   | 0      | 0      | 4.37   | 18.59 | 0.27  |
| GAIF01022131.1 | 14.9   | 8.44   | 37.29  | 14.8   | 0.41  | 8.66  |
| GAIF01022132.1 | 2.61   | 0.52   | 0.83   | 1.1    | 0.34  | 1.1   |
| GAIF01022133.1 | 14.48  | 35.02  | 28.59  | 19.74  | 23.19 | 6.09  |
| GAIF01022134.1 | 17.85  | 13.3   | 12.33  | 29.1   | 33.93 | 33.74 |
| GAIF01022136.1 | 11.92  | 9.85   | 10.36  | 19.74  | 8.66  | 4.65  |
| GAIF01022137.1 | 20.41  | 26.6   | 23     | 18.18  | 19.95 | 3.93  |
| GAIF01022138.1 | 20.66  | 17.42  | 10.67  | 55.36  | 75.04 | 13.45 |
| GAIF01022142.1 | 294.33 | 259.99 | 30.7   | 7.46   | 21.01 | 0.9   |
| GAIF01022143.1 | 0.24   | 0.32   | 0      | 6.22   | 15.08 | 0.15  |
| GAIF01022144.1 | 0      | 0      | 0      | 0      | 0.13  | 0     |
| GAIF01022145.1 | 0      | 0      | 0      | 0      | 1.66  | 0     |
| GAIF01022146.1 | 12.59  | 42.5   | 33.61  | 14.98  | 26.55 | 7.64  |
| GAIF01022150.1 | 0      | 0      | 0.16   | 0      | 2.91  | 0.46  |



|                |        |        |        |        |        |        |
|----------------|--------|--------|--------|--------|--------|--------|
| GAIF01022151.1 | 0      | 0.16   | 0.08   | 0      | 0      | 0      |
| GAIF01022152.1 | 0      | 0.05   | 0      | 0.74   | 0.45   | 0.05   |
| GAIF01022153.1 | 40.71  | 38.02  | 14.32  | 161.96 | 181.5  | 2.42   |
| GAIF01022155.1 | 15.63  | 16.14  | 12.1   | 36.79  | 18.68  | 11.88  |
| GAIF01022156.1 | 0.04   | 0.04   | 0.05   | 0.05   | 0.79   | 0      |
| GAIF01022157.1 | 1.09   | 1.76   | 1.52   | 9.33   | 13.56  | 1.2    |
| GAIF01022160.1 | 5.71   | 5.23   | 1.86   | 1.54   | 2.7    | 0.94   |
| GAIF01022161.1 | 0      | 0.12   | 0.06   | 0      | 0      | 0.44   |
| GAIF01022163.1 | 0.02   | 0.04   | 0      | 0.14   | 0.21   | 0      |
| GAIF01022165.1 | 0.66   | 0.18   | 0.4    | 0.98   | 0.46   | 0.33   |
| GAIF01022167.1 | 0      | 0      | 0      | 0.16   | 0.05   | 0      |
| GAIF01022169.1 | 0.15   | 0      | 0      | 0.26   | 1.77   | 0.16   |
| GAIF01022170.1 | 0.89   | 0      | 0      | 0.47   | 0      | 0      |
| GAIF01022171.1 | 0.32   | 0      | 0.35   | 0.25   | 0      | 0.12   |
| GAIF01022173.1 | 0.17   | 0.1    | 0.06   | 0.05   | 0.01   | 0.35   |
| GAIF01022175.1 | 0.02   | 0      | 0      | 0      | 0      | 0      |
| GAIF01022178.1 | 0.1    | 0.16   | 0.21   | 0.56   | 0.94   | 0.11   |
| GAIF01022179.1 | 0.44   | 0      | 0.65   | 0.34   | 0      | 0      |
| GAIF01022180.1 | 0.33   | 0.72   | 0.6    | 0.13   | 0.13   | 0.49   |
| GAIF01022182.1 | 1.44   | 2.16   | 0.95   | 4.78   | 2.59   | 0.45   |
| GAIF01022183.1 | 0      | 0      | 1.24   | 0      | 0      | 0.47   |
| GAIF01022184.1 | 15.36  | 14.72  | 10.44  | 14.09  | 7.75   | 2.19   |
| GAIF01022185.1 | 2.61   | 2.27   | 1      | 7.71   | 13.63  | 2.15   |
| GAIF01022186.1 | 2.37   | 1.46   | 0.6    | 1.27   | 3.44   | 0.2    |
| GAIF01022187.1 | 12.79  | 8.1    | 9.61   | 6.53   | 7.66   | 6.7    |
| GAIF01022188.1 | 3.83   | 3.36   | 3.8    | 0.72   | 0.3    | 0      |
| GAIF01022190.1 | 9.21   | 16.61  | 14.05  | 25.07  | 19.68  | 4.02   |
| GAIF01022194.1 | 0      | 0      | 0      | 82.19  | 52.85  | 16.41  |
| GAIF01022195.1 | 15.54  | 13.25  | 11.46  | 34.42  | 18.58  | 5.93   |
| GAIF01022196.1 | 0.23   | 0.93   | 0      | 3.98   | 8.72   | 0      |
| GAIF01022197.1 | 1.35   | 0.21   | 0      | 2.24   | 12.31  | 0.64   |
| GAIF01022199.1 | 347.51 | 162.12 | 133.37 | 215.9  | 173.3  | 178.78 |
| GAIF01022200.1 | 0.03   | 0      | 0.07   | 0.02   | 2.33   | 0      |
| GAIF01022202.1 | 7.84   | 7.45   | 7.26   | 14.47  | 12.84  | 6.25   |
| GAIF01022204.1 | 6.78   | 2.73   | 0.42   | 71.27  | 174.16 | 0.95   |
| GAIF01022205.1 | 0      | 0.15   | 0      | 0.16   | 0      | 0      |
| GAIF01022206.1 | 6.25   | 6.38   | 1.56   | 8.59   | 5.43   | 2.81   |
| GAIF01022208.1 | 251.47 | 101.91 | 112.4  | 101.64 | 112.8  | 298    |
| GAIF01022210.1 | 0.42   | 0.45   | 0.34   | 1.21   | 2.25   | 0.11   |
| GAIF01022213.1 | 0.21   | 0.32   | 0.12   | 0.18   | 0.09   | 0.15   |
| GAIF01022214.1 | 6.35   | 5.42   | 1.79   | 4.14   | 4.18   | 0.43   |
| GAIF01022215.1 | 0.87   | 0.2    | 0.35   | 0.74   | 1.34   | 0      |
| GAIF01022216.1 | 10.44  | 17.79  | 23.88  | 49.63  | 31.73  | 12.01  |
| GAIF01022218.1 | 1.57   | 0.14   | 0.14   | 0.45   | 0      | 0      |

|                |         |         |         |         |         |         |
|----------------|---------|---------|---------|---------|---------|---------|
| GAIF01022219.1 | 0.05    | 0.16    | 0       | 0.23    | 1.07    | 0.27    |
| GAIF01022220.1 | 5.13    | 2.12    | 0.66    | 3.85    | 0.88    | 0.2     |
| GAIF01022221.1 | 0       | 0.05    | 0       | 0       | 0       | 0       |
| GAIF01022224.1 | 12.01   | 0       | 0       | 0       | 6.34    | 22.03   |
| GAIF01022226.1 | 0.99    | 0.54    | 0       | 3.45    | 14.09   | 0       |
| GAIF01022227.1 | 0.95    | 0       | 0.12    | 0       | 0       | 0.12    |
| GAIF01022231.1 | 2.68    | 4.6     | 1.92    | 11.62   | 14.51   | 1.15    |
| GAIF01022232.1 | 0       | 0       | 1.19    | 0       | 0       | 0       |
| GAIF01022233.1 | 14.46   | 23.73   | 8.51    | 19.49   | 18.48   | 1.22    |
| GAIF01022234.1 | 0       | 0.34    | 0.35    | 0       | 0.05    | 0.35    |
| GAIF01022235.1 | 3600.98 | 666.3   | 1526.15 | 2782.22 | 1403.27 | 8658.27 |
| GAIF01022236.1 | 3.37    | 4.74    | 3.89    | 33.13   | 69.9    | 4.86    |
| GAIF01022237.1 | 0.03    | 0       | 0       | 0.05    | 0       | 0       |
| GAIF01022238.1 | 22.11   | 32.38   | 17      | 63.47   | 50.34   | 5.09    |
| GAIF01022239.1 | 1.52    | 0.22    | 0.28    | 12.09   | 39.64   | 0.61    |
| GAIF01022240.1 | 0       | 0       | 0       | 42.84   | 19.43   | 6.08    |
| GAIF01022242.1 | 102.69  | 101.18  | 166.92  | 49.76   | 31.19   | 83.45   |
| GAIF01022243.1 | 0.11    | 0       | 0       | 0       | 0       | 0       |
| GAIF01022244.1 | 0.73    | 0       | 0.06    | 0.04    | 0       | 0.25    |
| GAIF01022246.1 | 0.11    | 0.19    | 0       | 1.2     | 5.39    | 0       |
| GAIF01022247.1 | 0       | 0       | 0       | 0       | 3.88    | 0       |
| GAIF01022248.1 | 0.06    | 0       | 0       | 0       | 0       | 0       |
| GAIF01022250.1 | 0.67    | 0.21    | 0.17    | 2.33    | 0.6     | 0.45    |
| GAIF01022251.1 | 0.02    | 0.04    | 0       | 0.14    | 0.5     | 0       |
| GAIF01022252.1 | 0.48    | 0.79    | 0.19    | 2.56    | 4.01    | 0       |
| GAIF01022253.1 | 0       | 0       | 0.07    | 0       | 0       | 0       |
| GAIF01022254.1 | 0.16    | 0.09    | 0       | 0.09    | 0       | 0       |
| GAIF01022255.1 | 3.26    | 2.25    | 0.37    | 1.41    | 0       | 0.57    |
| GAIF01022256.1 | 0       | 0       | 0       | 0       | 0.11    | 0       |
| GAIF01022257.1 | 0.76    | 0.5     | 0.67    | 1.41    | 2.56    | 1.67    |
| GAIF01022258.1 | 0.35    | 0.08    | 0.07    | 0.53    | 0.26    | 1.13    |
| GAIF01022259.1 | 0.78    | 0.98    | 0.55    | 0.39    | 0.1     | 0       |
| GAIF01022260.1 | 5.2     | 11.54   | 5.63    | 16.32   | 11.34   | 1.26    |
| GAIF01022261.1 | 0.23    | 0.29    | 0.57    | 0.13    | 0.34    | 0       |
| GAIF01022262.1 | 29.62   | 26.27   | 17.61   | 47.85   | 36.63   | 15.57   |
| GAIF01022263.1 | 0.13    | 0       | 0       | 0       | 1.96    | 0       |
| GAIF01022264.1 | 42.08   | 22.97   | 40.59   | 122.53  | 192.7   | 34.08   |
| GAIF01022265.1 | 0.86    | 5.04    | 2.89    | 0       | 0       | 0.21    |
| GAIF01022266.1 | 0.16    | 0.23    | 0       | 0.06    | 0.37    | 0.06    |
| GAIF01022267.1 | 11.85   | 13.57   | 9.65    | 29.35   | 37.11   | 4.01    |
| GAIF01022268.1 | 8.02    | 8.82    | 10.96   | 22.46   | 28.16   | 13.47   |
| GAIF01022270.1 | 12.42   | 12.39   | 15.9    | 27.53   | 14.73   | 6.28    |
| GAIF01022272.1 | 604.13  | 1054.11 | 1173.87 | 233.01  | 234.97  | 390.88  |
| GAIF01022273.1 | 1.99    | 0.12    | 0       | 0       | 0       | 0       |

|                |        |         |        |        |        |       |
|----------------|--------|---------|--------|--------|--------|-------|
| GAIF01022274.1 | 0      | 0       | 0      | 0.16   | 2.47   | 0     |
| GAIF01022275.1 | 3.54   | 0.7     | 0.15   | 3.24   | 6.9    | 0.69  |
| GAIF01022276.1 | 0.07   | 0       | 0      | 0.42   | 1.8    | 0.11  |
| GAIF01022277.1 | 0.17   | 0.09    | 0.09   | 0.59   | 2.84   | 0.09  |
| GAIF01022278.1 | 0      | 0.03    | 0      | 0      | 0      | 0     |
| GAIF01022279.1 | 0      | 0       | 0      | 0.04   | 0      | 0     |
| GAIF01022280.1 | 14.68  | 16.6    | 13.5   | 43.74  | 54.77  | 12.65 |
| GAIF01022281.1 | 0      | 0.18    | 0      | 0      | 0.1    | 0     |
| GAIF01022283.1 | 0      | 0       | 0.31   | 0.33   | 0      | 0     |
| GAIF01022284.1 | 0.92   | 0.52    | 0.7    | 0.28   | 0.19   | 0     |
| GAIF01022285.1 | 7.39   | 8.59    | 9.36   | 9.89   | 4.66   | 2.16  |
| GAIF01022286.1 | 0      | 0       | 0.24   | 0      | 0      | 0     |
| GAIF01022287.1 | 0      | 0       | 0      | 0.03   | 0.09   | 0.03  |
| GAIF01022288.1 | 28.46  | 8.27    | 6.96   | 158.3  | 311.42 | 11.99 |
| GAIF01022290.1 | 0.26   | 0       | 0      | 0.15   | 0.15   | 0     |
| GAIF01022291.1 | 0.54   | 0       | 0      | 0      | 0      | 0     |
| GAIF01022293.1 | 0      | 0       | 0      | 0      | 0.13   | 0     |
| GAIF01022294.1 | 13.13  | 8.87    | 10.39  | 48.46  | 32.33  | 8.25  |
| GAIF01022295.1 | 0      | 0       | 0.24   | 0      | 0.26   | 0     |
| GAIF01022296.1 | 2.53   | 8.74    | 6.28   | 5.37   | 10.59  | 0.73  |
| GAIF01022297.1 | 0.06   | 0.07    | 0.07   | 0      | 0.22   | 0     |
| GAIF01022298.1 | 5.62   | 3.78    | 4.53   | 8.51   | 9.45   | 4.19  |
| GAIF01022301.1 | 0.13   | 0       | 0      | 0.24   | 0.86   | 0     |
| GAIF01022302.1 | 0.24   | 0       | 0.08   | 0.19   | 0.21   | 0     |
| GAIF01022303.1 | 0      | 0       | 0      | 0.34   | 0      | 0     |
| GAIF01022304.1 | 6.88   | 4.05    | 1.97   | 12.81  | 25.45  | 2.18  |
| GAIF01022305.1 | 0      | 0.06    | 0      | 0      | 0      | 0     |
| GAIF01022307.1 | 24.22  | 31.28   | 24.98  | 56.29  | 45.3   | 15.3  |
| GAIF01022309.1 | 738.19 | 2218.74 | 2282.5 | 337.84 | 306.58 | 400.4 |
| GAIF01022310.1 | 0      | 0.17    | 0.04   | 0.18   | 0.9    | 0     |
| GAIF01022313.1 | 0.21   | 0.84    | 1      | 0.24   | 0      | 0.39  |
| GAIF01022314.1 | 24.5   | 7.49    | 4.87   | 29.79  | 36.34  | 19.16 |
| GAIF01022315.1 | 5.4    | 4.51    | 2.2    | 25.37  | 24.9   | 1.3   |
| GAIF01022316.1 | 16.67  | 8.57    | 12.67  | 44.76  | 28.53  | 25.54 |
| GAIF01022318.1 | 1      | 0       | 0.18   | 2.3    | 13.54  | 0.47  |
| GAIF01022319.1 | 0.13   | 0.04    | 0      | 1.25   | 4.29   | 0.43  |
| GAIF01022320.1 | 0.06   | 0       | 0      | 0.07   | 0      | 0     |
| GAIF01022322.1 | 0      | 2.13    | 4.53   | 0      | 0      | 0     |
| GAIF01022326.1 | 7.8    | 15.46   | 9.08   | 22.97  | 21.34  | 0.72  |
| GAIF01022329.1 | 54.78  | 71.46   | 46.11  | 114.81 | 71.06  | 13.5  |
| GAIF01022330.1 | 36.35  | 54.76   | 37.9   | 109.72 | 79.5   | 23.84 |
| GAIF01022331.1 | 0.05   | 0.11    | 0      | 0.06   | 0.24   | 0     |
| GAIF01022332.1 | 0      | 0.13    | 0      | 0      | 0      | 0     |
| GAIF01022334.1 | 0      | 0       | 0      | 0.99   | 0      | 0     |

|                |         |        |         |        |        |        |
|----------------|---------|--------|---------|--------|--------|--------|
| GAIF01022335.1 | 0       | 0.19   | 0       | 1.46   | 2.29   | 0.14   |
| GAIF01022336.1 | 0.23    | 0.05   | 0       | 0.96   | 8.04   | 0.4    |
| GAIF01022337.1 | 0       | 0      | 0       | 0.8    | 0      | 0      |
| GAIF01022338.1 | 2.78    | 0      | 2.13    | 23.2   | 3.23   | 28.25  |
| GAIF01022339.1 | 2.08    | 0.33   | 0.3     | 5.28   | 15.29  | 8.21   |
| GAIF01022340.1 | 8.13    | 9.16   | 10.2    | 15.62  | 15.08  | 6.24   |
| GAIF01022341.1 | 0.09    | 0      | 0       | 0      | 0.11   | 0      |
| GAIF01022342.1 | 0       | 5.19   | 7.52    | 0      | 0.77   | 0      |
| GAIF01022343.1 | 97.03   | 62.48  | 176.41  | 55.42  | 21.94  | 22.7   |
| GAIF01022344.1 | 0.17    | 0      | 0       | 0.71   | 2.25   | 0.19   |
| GAIF01022346.1 | 0       | 0      | 0       | 0      | 0.31   | 0      |
| GAIF01022349.1 | 0.64    | 0      | 0       | 1.25   | 4.65   | 3.43   |
| GAIF01022351.1 | 0       | 0.06   | 0       | 0.2    | 2.09   | 0.06   |
| GAIF01022352.1 | 14.26   | 6.43   | 6.18    | 26.28  | 32.37  | 14.17  |
| GAIF01022354.1 | 1.74    | 0.41   | 0.55    | 6.64   | 13.32  | 0.14   |
| GAIF01022355.1 | 7.87    | 7.47   | 9.58    | 1.49   | 0.86   | 4.42   |
| GAIF01022356.1 | 20.05   | 29.85  | 32.6    | 24.04  | 12.4   | 7.06   |
| GAIF01022360.1 | 0       | 0      | 0       | 0.09   | 0      | 0      |
| GAIF01022362.1 | 0       | 0.27   | 0       | 0.14   | 0.21   | 0      |
| GAIF01022363.1 | 1.48    | 0.16   | 0.11    | 9.78   | 52.56  | 0.65   |
| GAIF01022364.1 | 13.12   | 11.7   | 8.32    | 34.14  | 54.37  | 11.19  |
| GAIF01022365.1 | 49.22   | 69.74  | 76.56   | 51.13  | 25.19  | 16.92  |
| GAIF01022366.1 | 0.29    | 0.32   | 0       | 1.35   | 8.27   | 0.21   |
| GAIF01022368.1 | 0       | 0      | 1.78    | 0      | 0      | 0      |
| GAIF01022370.1 | 0       | 0.31   | 0       | 0.42   | 1.63   | 0      |
| GAIF01022373.1 | 29.96   | 21.01  | 30.71   | 47.83  | 53.72  | 84.17  |
| GAIF01022374.1 | 12.73   | 5.8    | 0.23    | 23.59  | 51.59  | 52.03  |
| GAIF01022375.1 | 0.15    | 0.08   | 0       | 0.09   | 0      | 0.08   |
| GAIF01022376.1 | 5.81    | 1.79   | 0.79    | 0.49   | 0.2    | 0.2    |
| GAIF01022377.1 | 0.44    | 0.04   | 0       | 2.02   | 11.13  | 0.92   |
| GAIF01022379.1 | 1204.29 | 900.12 | 1044.32 | 591.29 | 379.88 | 921.06 |
| GAIF01022381.1 | 0       | 0.1    | 0       | 88.92  | 433.66 | 13.06  |
| GAIF01022384.1 | 0.71    | 0.12   | 0.24    | 3.32   | 15     | 2.12   |
| GAIF01022386.1 | 0       | 0.3    | 0.33    | 0      | 0      | 0.64   |
| GAIF01022387.1 | 0.37    | 0.1    | 0       | 0      | 0.32   | 0.1    |
| GAIF01022388.1 | 0       | 0      | 0       | 0      | 0.99   | 0      |
| GAIF01022390.1 | 3.49    | 4.86   | 2.27    | 0.38   | 0.39   | 0.12   |
| GAIF01022392.1 | 1.16    | 0.28   | 0.12    | 4.95   | 14.51  | 0.24   |
| GAIF01022393.1 | 4.18    | 0.38   | 0       | 8.95   | 10.27  | 5.16   |
| GAIF01022394.1 | 0.03    | 0.03   | 0       | 0      | 0.13   | 0      |
| GAIF01022396.1 | 9.53    | 8.6    | 17.11   | 25.87  | 13.4   | 32.75  |
| GAIF01022397.1 | 1.57    | 0      | 0       | 5.28   | 13.79  | 0.17   |
| GAIF01022398.1 | 0.2     | 0.27   | 0.38    | 0.11   | 0      | 0.05   |
| GAIF01022399.1 | 0       | 0      | 0       | 0      | 0.34   | 0      |

|                |         |         |        |        |        |        |
|----------------|---------|---------|--------|--------|--------|--------|
| GAIF01022400.1 | 0.04    | 0       | 0      | 0      | 0.05   | 0      |
| GAIF01022401.1 | 12.54   | 11.84   | 5.96   | 39.76  | 42.51  | 1.53   |
| GAIF01022405.1 | 0       | 0.06    | 0      | 0      | 0.13   | 0      |
| GAIF01022406.1 | 1.15    | 0.61    | 0.07   | 3.93   | 21.53  | 1.63   |
| GAIF01022407.1 | 0.2     | 0.38    | 0.22   | 1.82   | 1.46   | 0.06   |
| GAIF01022408.1 | 0       | 0       | 0      | 0      | 0.06   | 0      |
| GAIF01022410.1 | 0       | 0       | 0      | 0      | 0.02   | 0      |
| GAIF01022411.1 | 0.12    | 0       | 0.14   | 0.72   | 1.5    | 0.55   |
| GAIF01022413.1 | 13.55   | 15.41   | 16.54  | 31.34  | 17.58  | 4.13   |
| GAIF01022414.1 | 1.66    | 0.25    | 0.32   | 4.3    | 7.05   | 1.97   |
| GAIF01022415.1 | 50.41   | 89.84   | 41.99  | 64.22  | 68.85  | 8.55   |
| GAIF01022416.1 | 3.29    | 3.77    | 0      | 4.42   | 18.49  | 2.96   |
| GAIF01022417.1 | 0.45    | 0.23    | 0      | 0.49   | 2.24   | 0      |
| GAIF01022419.1 | 0.12    | 0       | 0      | 0.43   | 0.44   | 0      |
| GAIF01022420.1 | 43.34   | 70.75   | 47.33  | 253.59 | 243.81 | 44.77  |
| GAIF01022421.1 | 14.18   | 17.48   | 10.08  | 5.99   | 3.66   | 0.9    |
| GAIF01022422.1 | 0       | 0.14    | 0      | 0      | 0      | 0      |
| GAIF01022424.1 | 7.75    | 10.19   | 17.99  | 31.7   | 26.77  | 10.29  |
| GAIF01022426.1 | 255.47  | 229.12  | 201.78 | 166.77 | 109.18 | 69.16  |
| GAIF01022427.1 | 0       | 0       | 0      | 0.41   | 0      | 0.06   |
| GAIF01022428.1 | 14.99   | 8.27    | 6.26   | 18.83  | 39.65  | 25.13  |
| GAIF01022429.1 | 618.5   | 168.71  | 441.82 | 994.45 | 564.56 | 981.91 |
| GAIF01022430.1 | 7.7     | 8.06    | 10.38  | 25.09  | 20.94  | 5.39   |
| GAIF01022433.1 | 0       | 0       | 1      | 0      | 0      | 0      |
| GAIF01022434.1 | 0       | 0       | 0      | 1.44   | 15.03  | 0      |
| GAIF01022435.1 | 20.03   | 36.17   | 47.94  | 14.96  | 26.21  | 7.32   |
| GAIF01022436.1 | 34.41   | 30.84   | 40.01  | 37.69  | 50.24  | 47.06  |
| GAIF01022438.1 | 5097.58 | 3156.26 | 3912   | 37.14  | 33.38  | 82.26  |
| GAIF01022439.1 | 0.07    | 0       | 0      | 0.04   | 0.38   | 0      |
| GAIF01022440.1 | 0       | 0       | 0      | 0.12   | 0      | 0.07   |
| GAIF01022441.1 | 1.72    | 1.77    | 0.87   | 2.3    | 0.53   | 0.05   |
| GAIF01022442.1 | 0.52    | 0.75    | 0.19   | 1.2    | 3.74   | 0      |
| GAIF01022443.1 | 0.34    | 0.04    | 0      | 1.39   | 5.42   | 0      |
| GAIF01022445.1 | 0       | 0       | 0      | 0      | 0.08   | 0      |
| GAIF01022446.1 | 0       | 0       | 0      | 0      | 0.75   | 0      |
| GAIF01022447.1 | 0       | 0.67    | 0.73   | 0      | 0.07   | 0.06   |
| GAIF01022449.1 | 7.68    | 10.6    | 3.18   | 56.92  | 47.38  | 2.04   |
| GAIF01022450.1 | 25.81   | 24.36   | 20.14  | 92.55  | 49.53  | 9.08   |
| GAIF01022453.1 | 4.77    | 4.67    | 2.61   | 22.13  | 33.84  | 1.09   |
| GAIF01022454.1 | 1.16    | 0       | 0      | 2.51   | 11.8   | 0.55   |
| GAIF01022455.1 | 70.85   | 46.76   | 30.56  | 36.01  | 34.52  | 10.92  |
| GAIF01022457.1 | 0.07    | 0.16    | 0.08   | 2.54   | 12.11  | 0.4    |
| GAIF01022458.1 | 0       | 0.03    | 0      | 0.58   | 5.68   | 0.2    |
| GAIF01022460.1 | 0.06    | 0       | 0      | 0      | 0.07   | 0      |

|                |        |        |       |        |        |       |
|----------------|--------|--------|-------|--------|--------|-------|
| GAIF01022461.1 | 0      | 0      | 0     | 0      | 0.67   | 0     |
| GAIF01022465.1 | 13.64  | 9.78   | 6.32  | 21.84  | 17.84  | 20.14 |
| GAIF01022466.1 | 0.11   | 0.24   | 0.36  | 0      | 0      | 0     |
| GAIF01022471.1 | 0      | 0      | 0     | 0      | 0.07   | 0     |
| GAIF01022472.1 | 8.85   | 12.47  | 5.16  | 30.61  | 19.24  | 2.41  |
| GAIF01022473.1 | 0      | 0      | 0     | 0      | 0.1    | 0     |
| GAIF01022474.1 | 0      | 0      | 0     | 0.17   | 0      | 0     |
| GAIF01022475.1 | 0      | 0      | 0     | 0      | 0.28   | 0     |
| GAIF01022476.1 | 0      | 235.49 | 726.6 | 0      | 0      | 97.23 |
| GAIF01022478.1 | 11.16  | 18.53  | 18.07 | 66.64  | 63.04  | 8.83  |
| GAIF01022480.1 | 3.29   | 0.77   | 0.29  | 0.24   | 0.36   | 0     |
| GAIF01022481.1 | 0      | 0      | 0     | 0      | 0.1    | 0     |
| GAIF01022482.1 | 26.39  | 39.48  | 28.57 | 49.48  | 38.65  | 5.15  |
| GAIF01022483.1 | 0.18   | 0.71   | 0.07  | 0.07   | 0.65   | 0.07  |
| GAIF01022484.1 | 0.09   | 0      | 0     | 0.25   | 0.95   | 0     |
| GAIF01022485.1 | 1.01   | 2.19   | 0.64  | 0.29   | 0.1    | 0     |
| GAIF01022486.1 | 260.26 | 125.46 | 81.58 | 124.06 | 68.98  | 26.12 |
| GAIF01022487.1 | 16.75  | 28.99  | 15.95 | 16.01  | 13.91  | 5.2   |
| GAIF01022488.1 | 0      | 0      | 0     | 0      | 0.41   | 0     |
| GAIF01022489.1 | 0.03   | 0.04   | 0     | 0      | 0.02   | 0     |
| GAIF01022490.1 | 3.25   | 1.57   | 2.38  | 3.07   | 2.17   | 2.92  |
| GAIF01022491.1 | 0      | 0      | 0     | 0.49   | 1.88   | 0     |
| GAIF01022493.1 | 80.86  | 115.88 | 99.79 | 13.92  | 10.42  | 2.45  |
| GAIF01022494.1 | 0      | 0      | 0     | 0      | 0.14   | 0     |
| GAIF01022495.1 | 0.17   | 0      | 0     | 0.06   | 0.87   | 0     |
| GAIF01022496.1 | 9.89   | 11.15  | 1.78  | 63.97  | 122.17 | 8.35  |
| GAIF01022497.1 | 0      | 0      | 0.01  | 0.12   | 0.25   | 0.01  |
| GAIF01022498.1 | 9.49   | 1.55   | 0.46  | 0.45   | 0      | 0     |
| GAIF01022500.1 | 0.25   | 0.14   | 0     | 0      | 0.76   | 0     |
| GAIF01022501.1 | 43.68  | 58.8   | 41.81 | 66.91  | 69.36  | 13.77 |
| GAIF01022502.1 | 0.01   | 0      | 0.01  | 0.03   | 0.01   | 0     |
| GAIF01022503.1 | 0.06   | 0      | 0     | 1.12   | 0      | 0     |
| GAIF01022504.1 | 5.01   | 3.52   | 0.76  | 15.41  | 27.55  | 0.02  |
| GAIF01022506.1 | 1.24   | 0.67   | 0     | 1.43   | 32.33  | 0     |
| GAIF01022508.1 | 11.37  | 12.59  | 10.76 | 21.88  | 0      | 2     |
| GAIF01022510.1 | 0      | 0.03   | 0     | 0.1    | 0      | 0     |
| GAIF01022513.1 | 5.39   | 10.85  | 6.04  | 0.97   | 0.89   | 0.14  |
| GAIF01022516.1 | 88.81  | 71.95  | 45.19 | 137.71 | 78.72  | 12.47 |
| GAIF01022518.1 | 0.1    | 0.21   | 0     | 0.8    | 3.42   | 0     |
| GAIF01022519.1 | 0      | 0      | 0     | 0      | 0.14   | 0     |
| GAIF01022520.1 | 0      | 1.16   | 3.63  | 0.32   | 0      | 1.86  |
| GAIF01022521.1 | 3.17   | 4.12   | 2.98  | 7.9    | 8.62   | 1.92  |
| GAIF01022522.1 | 0.09   | 0      | 0.1   | 0      | 0      | 0     |
| GAIF01022523.1 | 16.93  | 13.51  | 18.99 | 49.15  | 58.02  | 13.31 |

|                |        |        |        |        |        |        |
|----------------|--------|--------|--------|--------|--------|--------|
| GAIF01022525.1 | 6.6    | 9.09   | 4.45   | 14.99  | 17.8   | 1.19   |
| GAIF01022527.1 | 74.21  | 0.66   | 1.13   | 8.58   | 1.76   | 0.75   |
| GAIF01022530.1 | 0      | 0      | 0      | 0      | 0.35   | 0      |
| GAIF01022531.1 | 5.94   | 4.43   | 2.3    | 7.66   | 1.85   | 1.33   |
| GAIF01022532.1 | 27.17  | 10.77  | 25.78  | 7.83   | 4.22   | 11.98  |
| GAIF01022533.1 | 0.12   | 0.25   | 0      | 0.83   | 2.92   | 0.67   |
| GAIF01022534.1 | 0      | 0.1    | 0      | 0      | 0.11   | 0      |
| GAIF01022535.1 | 4.89   | 16.69  | 7.82   | 0      | 0.02   | 42.81  |
| GAIF01022537.1 | 15.58  | 9.2    | 18.48  | 11.29  | 8.77   | 15.58  |
| GAIF01022538.1 | 0      | 0      | 0      | 0      | 0.02   | 0      |
| GAIF01022539.1 | 0.44   | 0.36   | 0      | 0.51   | 3.71   | 1.58   |
| GAIF01022541.1 | 0.05   | 0      | 0      | 0.02   | 0      | 0      |
| GAIF01022542.1 | 0      | 0.13   | 0      | 0      | 0.15   | 0      |
| GAIF01022543.1 | 38.05  | 29.48  | 8.63   | 92.65  | 87.23  | 5.1    |
| GAIF01022544.1 | 14.71  | 18.82  | 30.01  | 46.7   | 32.7   | 35.04  |
| GAIF01022545.1 | 3.94   | 2.05   | 1.4    | 1.75   | 1.01   | 0.77   |
| GAIF01022547.1 | 3      | 1.63   | 0.51   | 11.92  | 25.81  | 0.76   |
| GAIF01022548.1 | 0.13   | 0      | 0      | 0      | 0      | 0      |
| GAIF01022549.1 | 0      | 0      | 0      | 0.51   | 0.26   | 0      |
| GAIF01022550.1 | 0      | 0.03   | 0      | 0      | 0      | 0      |
| GAIF01022551.1 | 0.26   | 0.62   | 0.3    | 0.4    | 0.3    | 0.13   |
| GAIF01022552.1 | 0      | 0.17   | 0      | 0      | 0      | 0      |
| GAIF01022553.1 | 0.53   | 0.48   | 0      | 0.62   | 2.78   | 0.29   |
| GAIF01022554.1 | 0.15   | 0.08   | 0.23   | 0.64   | 0.61   | 0.05   |
| GAIF01022555.1 | 53.88  | 47.45  | 40.77  | 13.24  | 9.1    | 6.01   |
| GAIF01022556.1 | 0      | 1.23   | 1.88   | 0      | 0.12   | 0.23   |
| GAIF01022557.1 | 127.75 | 124.64 | 77.82  | 22.65  | 23.32  | 30.08  |
| GAIF01022558.1 | 0.2    | 0      | 0.14   | 1.37   | 5.46   | 0.14   |
| GAIF01022559.1 | 4.56   | 1.26   | 0.3    | 25.25  | 79.86  | 1.15   |
| GAIF01022560.1 | 19.73  | 34.76  | 22.4   | 58.74  | 30.76  | 6.3    |
| GAIF01022561.1 | 0.5    | 0.44   | 0.9    | 0      | 0.05   | 0.1    |
| GAIF01022562.1 | 34.09  | 8.66   | 12.01  | 9.14   | 6.19   | 16.61  |
| GAIF01022565.1 | 0.26   | 0      | 0      | 0.9    | 3.43   | 0.14   |
| GAIF01022566.1 | 1.85   | 3.28   | 0      | 1.58   | 4.33   | 0      |
| GAIF01022567.1 | 0      | 0.3    | 0.21   | 0.13   | 0      | 0.14   |
| GAIF01022569.1 | 0.08   | 0      | 0      | 0.03   | 0.29   | 0      |
| GAIF01022570.1 | 0.43   | 0.28   | 0      | 1.3    | 5.49   | 0      |
| GAIF01022571.1 | 0.11   | 0.12   | 0      | 0.65   | 3.77   | 2.71   |
| GAIF01022573.1 | 13.35  | 5.73   | 4.29   | 22.03  | 11.52  | 3.57   |
| GAIF01022575.1 | 0.09   | 0.09   | 0      | 0      | 0      | 0      |
| GAIF01022576.1 | 1.45   | 0.71   | 0.17   | 5.59   | 7.9    | 0.17   |
| GAIF01022578.1 | 0.19   | 0.06   | 0.03   | 0.89   | 4.68   | 0.12   |
| GAIF01022579.1 | 0.19   | 0      | 0      | 0      | 0.43   | 0.85   |
| GAIF01022581.1 | 606.28 | 208.2  | 136.37 | 180.78 | 279.45 | 208.86 |

|                |       |       |       |       |       |       |
|----------------|-------|-------|-------|-------|-------|-------|
| GAIF01022582.1 | 0     | 0     | 0     | 0     | 0.04  | 0.1   |
| GAIF01022583.1 | 0     | 2.88  | 0.7   | 0     | 0.09  | 0.55  |
| GAIF01022584.1 | 95.09 | 83.1  | 65.44 | 86.62 | 69.79 | 72.02 |
| GAIF01022585.1 | 40.89 | 25.15 | 30.54 | 67.51 | 24.63 | 52.24 |
| GAIF01022587.1 | 0     | 0     | 0     | 0     | 0.11  | 0     |
| GAIF01022588.1 | 0     | 0     | 0.05  | 0.17  | 3.1   | 0     |
| GAIF01022589.1 | 0     | 0     | 0     | 0.05  | 0.05  | 0     |
| GAIF01022590.1 | 11.95 | 42.94 | 18.35 | 31.71 | 36.09 | 1.64  |
| GAIF01022592.1 | 1.25  | 0.11  | 0     | 3.98  | 29.26 | 8.25  |
| GAIF01022593.1 | 0.63  | 0     | 0     | 0.85  | 6.1   | 0     |
| GAIF01022594.1 | 5.2   | 2.18  | 0     | 8.64  | 12.56 | 0.6   |
| GAIF01022596.1 | 0     | 0     | 0.06  | 0.29  | 1.43  | 0.06  |
| GAIF01022597.1 | 0     | 0     | 0     | 0.13  | 0     | 0     |
| GAIF01022598.1 | 0     | 0.25  | 0.12  | 0.02  | 0.24  | 0     |
| GAIF01022599.1 | 3.13  | 1.61  | 3.15  | 4.74  | 2.32  | 2.7   |
| GAIF01022600.1 | 0     | 0     | 0     | 0     | 0.11  | 0     |
| GAIF01022602.1 | 0.46  | 0.27  | 0.13  | 1.84  | 6.24  | 2.49  |
| GAIF01022603.1 | 0     | 0     | 0.04  | 0.14  | 1.52  | 0.05  |
| GAIF01022605.1 | 2.23  | 1.8   | 3.57  | 0.95  | 0.33  | 2.29  |
| GAIF01022606.1 | 0.49  | 0.93  | 0     | 0.43  | 0     | 0     |
| GAIF01022607.1 | 0.78  | 0.21  | 0     | 2.07  | 10.04 | 0.3   |
| GAIF01022608.1 | 22.56 | 27.6  | 18.14 | 14.58 | 15.17 | 1.72  |
| GAIF01022610.1 | 0.18  | 0.06  | 0.09  | 0.06  | 0.61  | 0     |
| GAIF01022611.1 | 5.75  | 7.79  | 6.5   | 8.84  | 9.37  | 4.54  |
| GAIF01022612.1 | 0     | 0.07  | 0     | 0.11  | 0.15  | 0.1   |
| GAIF01022613.1 | 0.01  | 0     | 0     | 0     | 0     | 0     |
| GAIF01022615.1 | 3.74  | 1.84  | 0.49  | 0.52  | 0.75  | 0.1   |
| GAIF01022617.1 | 0.19  | 0.36  | 0     | 0.06  | 0.08  | 0.24  |
| GAIF01022619.1 | 6.47  | 8.9   | 6.27  | 15.02 | 8.7   | 3.5   |
| GAIF01022621.1 | 6.17  | 2.62  | 2.55  | 14.39 | 16.84 | 9.6   |
| GAIF01022622.1 | 1.39  | 0.48  | 0     | 1.39  | 2.35  | 0.07  |
| GAIF01022623.1 | 0.05  | 0.06  | 0     | 2.09  | 13.43 | 0     |
| GAIF01022624.1 | 0     | 0.33  | 0     | 0.26  | 0     | 0     |
| GAIF01022625.1 | 6.01  | 8.13  | 7.66  | 18.1  | 17.99 | 4.27  |
| GAIF01022626.1 | 17.98 | 6.8   | 4.07  | 36.31 | 27.54 | 11.49 |
| GAIF01022627.1 | 0     | 0     | 0     | 0     | 0.04  | 0     |
| GAIF01022628.1 | 0     | 0.03  | 0.03  | 2.38  | 5.71  | 0     |
| GAIF01022629.1 | 0.11  | 0.23  | 0.12  | 0.52  | 2.54  | 0.05  |
| GAIF01022630.1 | 0.29  | 0     | 0     | 0.46  | 0.29  | 0     |
| GAIF01022631.1 | 0.1   | 0.2   | 0     | 0     | 1.65  | 0     |
| GAIF01022633.1 | 0.23  | 0.06  | 0     | 0.24  | 2.43  | 0     |
| GAIF01022636.1 | 0.33  | 0.18  | 0     | 0.78  | 6.24  | 0.18  |
| GAIF01022637.1 | 66.36 | 28.5  | 70.64 | 49.59 | 34.9  | 21.93 |
| GAIF01022638.1 | 0     | 0     | 0.15  | 0     | 0     | 0     |



|                |        |        |        |         |        |        |
|----------------|--------|--------|--------|---------|--------|--------|
| GAIF01022641.1 | 0      | 0      | 0      | 0       | 0.26   | 0      |
| GAIF01022642.1 | 0      | 0      | 0      | 0       | 0.33   | 0      |
| GAIF01022644.1 | 0      | 0      | 0.02   | 0       | 0      | 0      |
| GAIF01022645.1 | 2.42   | 0.74   | 0.11   | 6.4     | 29.92  | 0.11   |
| GAIF01022646.1 | 0.48   | 2.6    | 1.99   | 5.1     | 6.67   | 0      |
| GAIF01022648.1 | 0      | 0      | 0      | 0       | 0.6    | 0      |
| GAIF01022649.1 | 0.39   | 0.57   | 0.72   | 1.07    | 0.47   | 0      |
| GAIF01022651.1 | 0      | 0      | 0      | 0       | 0.04   | 0      |
| GAIF01022652.1 | 0      | 0      | 0      | 0.18    | 1.23   | 0      |
| GAIF01022653.1 | 0.14   | 0.29   | 0      | 0       | 0      | 0      |
| GAIF01022654.1 | 334.18 | 527.99 | 618.57 | 1007.98 | 674.73 | 43.12  |
| GAIF01022655.1 | 0      | 0      | 0      | 0.45    | 7.07   | 0      |
| GAIF01022656.1 | 19.86  | 43.19  | 18.3   | 13.17   | 19.3   | 2.64   |
| GAIF01022657.1 | 0.1    | 0      | 0      | 2.48    | 11.99  | 0.35   |
| GAIF01022660.1 | 2.02   | 1.72   | 4.15   | 4.18    | 7.82   | 4.94   |
| GAIF01022661.1 | 0.07   | 0      | 0.12   | 1.85    | 7.92   | 1.06   |
| GAIF01022663.1 | 0.14   | 1.34   | 0      | 0.36    | 0.35   | 0      |
| GAIF01022665.1 | 13.51  | 16.7   | 4.16   | 12.25   | 20.56  | 6.38   |
| GAIF01022667.1 | 0      | 0      | 0      | 0.27    | 0      | 0      |
| GAIF01022668.1 | 0.96   | 1.97   | 0.42   | 0.86    | 2.06   | 0.29   |
| GAIF01022669.1 | 0.04   | 0      | 0      | 0.3     | 1.18   | 0      |
| GAIF01022670.1 | 0      | 0.31   | 1.3    | 0.8     | 7.44   | 0.08   |
| GAIF01022671.1 | 1.75   | 0.15   | 0.07   | 3.75    | 18.63  | 13.36  |
| GAIF01022672.1 | 0      | 0      | 0      | 0.23    | 0.24   | 0      |
| GAIF01022675.1 | 0.18   | 0      | 0      | 2.14    | 5.87   | 0.41   |
| GAIF01022676.1 | 0      | 0      | 0      | 0       | 0.11   | 0      |
| GAIF01022677.1 | 265.72 | 105.97 | 159.98 | 515.72  | 281.67 | 530.42 |
| GAIF01022679.1 | 2.96   | 3.83   | 3.08   | 13.56   | 14.39  | 2.37   |
| GAIF01022680.1 | 0.04   | 0      | 0      | 0       | 0      | 0      |
| GAIF01022681.1 | 0.15   | 0.17   | 0      | 0.71    | 0.74   | 0      |
| GAIF01022682.1 | 0      | 0      | 0      | 4.4     | 3.04   | 2.17   |
| GAIF01022683.1 | 37.46  | 49.35  | 30.62  | 16.62   | 9.06   | 30.68  |
| GAIF01022684.1 | 368.27 | 362.47 | 511.63 | 297.46  | 228.81 | 462.84 |
| GAIF01022685.1 | 0.09   | 0      | 0.19   | 1.23    | 5.73   | 0.15   |
| GAIF01022686.1 | 0      | 0      | 0      | 0.2     | 0.44   | 0      |
| GAIF01022687.1 | 0      | 0.12   | 0.5    | 0.13    | 0      | 0      |
| GAIF01022688.1 | 0      | 0      | 0      | 0       | 1      | 0      |
| GAIF01022689.1 | 14.2   | 16.41  | 15.23  | 25.3    | 24.47  | 7.52   |
| GAIF01022690.1 | 0      | 0      | 0      | 0.08    | 0.43   | 0      |
| GAIF01022691.1 | 5.07   | 3.81   | 4.51   | 10.23   | 3.05   | 2.53   |
| GAIF01022692.1 | 0.68   | 1.12   | 0.88   | 0.53    | 0.14   | 0.25   |
| GAIF01022693.1 | 0.71   | 0.34   | 0.09   | 2.29    | 6.08   | 1.74   |
| GAIF01022695.1 | 0.38   | 0.55   | 0      | 0       | 0.3    | 0      |
| GAIF01022696.1 | 0      | 0      | 0      | 0       | 0.35   | 0      |

|                |        |        |       |        |        |        |
|----------------|--------|--------|-------|--------|--------|--------|
| GAIF01022697.1 | 22.07  | 12.41  | 27.71 | 35.48  | 13.42  | 39     |
| GAIF01022699.1 | 40.96  | 39.96  | 34.41 | 48.53  | 38.83  | 33.32  |
| GAIF01022700.1 | 1.03   | 0.04   | 0     | 3.03   | 0      | 0      |
| GAIF01022702.1 | 0      | 0      | 0     | 0      | 0.7    | 0.22   |
| GAIF01022704.1 | 0      | 0.86   | 1.92  | 0      | 0      | 1.05   |
| GAIF01022705.1 | 0      | 0      | 0.19  | 0.2    | 0.24   | 0      |
| GAIF01022707.1 | 0      | 0      | 0     | 0      | 0.12   | 0      |
| GAIF01022708.1 | 0.71   | 0.34   | 0.48  | 0.22   | 0.11   | 0.07   |
| GAIF01022710.1 | 0      | 0.07   | 0.04  | 0      | 0.14   | 0.11   |
| GAIF01022711.1 | 6.77   | 3.18   | 6.7   | 23.67  | 9.85   | 7.83   |
| GAIF01022712.1 | 0.97   | 4.59   | 2.13  | 5.86   | 8.4    | 0.15   |
| GAIF01022713.1 | 0.21   | 0.23   | 0     | 1.14   | 6.1    | 0.16   |
| GAIF01022714.1 | 0      | 0      | 0.14  | 0      | 0      | 0      |
| GAIF01022715.1 | 0      | 0      | 0     | 0.49   | 0      | 0      |
| GAIF01022716.1 | 9.18   | 12.48  | 13.97 | 11.27  | 7.19   | 7.75   |
| GAIF01022717.1 | 0.03   | 16.57  | 10.02 | 0.15   | 29.9   | 2.13   |
| GAIF01022719.1 | 5.83   | 0      | 0     | 4.51   | 4.77   | 2.14   |
| GAIF01022720.1 | 11.24  | 14.07  | 11.27 | 26.13  | 23.49  | 3.37   |
| GAIF01022721.1 | 19.87  | 12.04  | 11.96 | 30.85  | 27.23  | 16.75  |
| GAIF01022722.1 | 0      | 0      | 0.03  | 0.2    | 0.77   | 0.08   |
| GAIF01022723.1 | 11.24  | 15.49  | 5.99  | 23.76  | 20.11  | 2.52   |
| GAIF01022724.1 | 13.81  | 11.21  | 7.95  | 45.89  | 58.54  | 3.97   |
| GAIF01022725.1 | 90.94  | 138.25 | 95.44 | 83.26  | 50.47  | 35.55  |
| GAIF01022726.1 | 0      | 0      | 0     | 0      | 3.79   | 0      |
| GAIF01022727.1 | 0.13   | 0      | 0     | 0      | 0      | 0      |
| GAIF01022729.1 | 0      | 0.22   | 0     | 0      | 0.82   | 0.43   |
| GAIF01022730.1 | 0      | 0.18   | 0     | 0      | 0      | 0      |
| GAIF01022731.1 | 40.47  | 37.57  | 62.56 | 90.63  | 53.08  | 70.22  |
| GAIF01022732.1 | 0.32   | 0.64   | 0.21  | 0.32   | 0      | 0.07   |
| GAIF01022734.1 | 0.12   | 0      | 0     | 0      | 0      | 0      |
| GAIF01022736.1 | 9.93   | 12.31  | 7.91  | 16.41  | 15.45  | 7.87   |
| GAIF01022737.1 | 0      | 0      | 0     | 0      | 0.28   | 0      |
| GAIF01022740.1 | 0      | 0      | 0     | 0.17   | 0.17   | 0      |
| GAIF01022742.1 | 7.54   | 4.38   | 7.63  | 24.21  | 22.49  | 13.91  |
| GAIF01022743.1 | 0      | 0      | 0     | 0.19   | 0.1    | 0      |
| GAIF01022745.1 | 0      | 0      | 0     | 0.08   | 0.21   | 0      |
| GAIF01022746.1 | 0.66   | 0.21   | 0.47  | 1.32   | 5.65   | 0.46   |
| GAIF01022747.1 | 38.09  | 19.11  | 20.39 | 35.35  | 47.56  | 36.56  |
| GAIF01022748.1 | 0.53   | 0.19   | 0.15  | 0.87   | 2.86   | 0.1    |
| GAIF01022751.1 | 0.48   | 0      | 0     | 0.08   | 0      | 0      |
| GAIF01022753.1 | 0.38   | 0      | 0.34  | 4.43   | 12.95  | 0.25   |
| GAIF01022754.1 | 129.95 | 190.13 | 259.8 | 118.87 | 102.88 | 179.33 |
| GAIF01022755.1 | 0      | 0      | 0     | 2.65   | 8.06   | 0      |
| GAIF01022757.1 | 0      | 0      | 0.1   | 0      | 0      | 0      |

|                |         |        |        |        |        |         |
|----------------|---------|--------|--------|--------|--------|---------|
| GAIF01022758.1 | 10.88   | 12.05  | 4.6    | 1.27   | 3.12   | 0.33    |
| GAIF01022759.1 | 0.24    | 0      | 0      | 0.21   | 0.93   | 0.2     |
| GAIF01022760.1 | 60.16   | 12.37  | 3.61   | 497.7  | 817.6  | 373.93  |
| GAIF01022761.1 | 6.11    | 11.67  | 5.11   | 28.24  | 23.53  | 1.31    |
| GAIF01022762.1 | 5.27    | 4.59   | 9.07   | 7.34   | 5.71   | 3.1     |
| GAIF01022763.1 | 26.59   | 42.41  | 24.86  | 61.09  | 50.94  | 4.85    |
| GAIF01022764.1 | 2.85    | 2.63   | 0.96   | 8.53   | 5.77   | 0       |
| GAIF01022766.1 | 8.91    | 6.28   | 5.71   | 18.09  | 25.01  | 1.74    |
| GAIF01022767.1 | 0       | 4.1    | 2.51   | 0      | 3      | 0       |
| GAIF01022768.1 | 1.68    | 2.63   | 0.64   | 6.46   | 12.24  | 0.65    |
| GAIF01022770.1 | 29.74   | 125.35 | 70.39  | 77.22  | 77.2   | 9.21    |
| GAIF01022771.1 | 2.91    | 2.01   | 0      | 14.03  | 46.62  | 0.86    |
| GAIF01022772.1 | 2.21    | 0.08   | 0      | 1.17   | 9.8    | 5.96    |
| GAIF01022773.1 | 0.68    | 0.56   | 0.09   | 2.78   | 8.03   | 0.66    |
| GAIF01022774.1 | 9.4     | 10.53  | 7.93   | 26.03  | 29.61  | 2.58    |
| GAIF01022775.1 | 0       | 0.27   | 0      | 0      | 0      | 0       |
| GAIF01022777.1 | 0       | 0      | 0      | 0      | 0.24   | 0.22    |
| GAIF01022778.1 | 2.4     | 0.71   | 0.22   | 3.68   | 19.97  | 1.16    |
| GAIF01022779.1 | 0       | 0      | 0      | 0.11   | 0      | 0       |
| GAIF01022780.1 | 0.81    | 0.44   | 1.79   | 0      | 0      | 0.22    |
| GAIF01022781.1 | 0       | 0.16   | 0      | 0      | 0      | 1.59    |
| GAIF01022782.1 | 0       | 0      | 0      | 0      | 0.12   | 0       |
| GAIF01022785.1 | 42.37   | 26.65  | 14.03  | 7.69   | 7.77   | 2.9     |
| GAIF01022786.1 | 37.27   | 51.4   | 54.09  | 57.08  | 37.48  | 9.21    |
| GAIF01022788.1 | 0       | 0      | 0.72   | 0      | 0      | 0       |
| GAIF01022789.1 | 0       | 0      | 0      | 0.06   | 0.07   | 0       |
| GAIF01022790.1 | 0.49    | 0.61   | 0      | 3.92   | 5.05   | 0       |
| GAIF01022791.1 | 37.64   | 18.78  | 14.75  | 0.19   | 0.3    | 0.18    |
| GAIF01022792.1 | 0.07    | 0      | 0.03   | 0.14   | 0.55   | 0.05    |
| GAIF01022793.1 | 0       | 0.02   | 0      | 0.22   | 0.3    | 0       |
| GAIF01022796.1 | 1197.06 | 626.15 | 667.74 | 694.42 | 727.84 | 2522.63 |
| GAIF01022798.1 | 0.44    | 0      | 0      | 0.26   | 5.59   | 0       |
| GAIF01022799.1 | 12.66   | 6.9    | 11.89  | 13.6   | 7.95   | 1.28    |
| GAIF01022801.1 | 0       | 0      | 0      | 0.17   | 0.17   | 0       |
| GAIF01022802.1 | 0       | 0.11   | 0      | 0.12   | 0      | 0       |
| GAIF01022803.1 | 72.63   | 85.49  | 135.68 | 41.54  | 44.73  | 40.61   |
| GAIF01022804.1 | 0.37    | 0.05   | 0      | 2.02   | 9.16   | 0.25    |
| GAIF01022805.1 | 1.46    | 1.15   | 0      | 6.91   | 24.66  | 0.87    |
| GAIF01022806.1 | 0       | 0      | 0      | 0      | 0.49   | 0       |
| GAIF01022807.1 | 0.23    | 0.51   | 0.39   | 0.51   | 0.42   | 0       |
| GAIF01022808.1 | 0.59    | 0.33   | 0.28   | 1.01   | 0.26   | 0.02    |
| GAIF01022810.1 | 0.37    | 0.24   | 0.08   | 2.66   | 12.91  | 0.41    |
| GAIF01022811.1 | 0.28    | 0.31   | 0.1    | 0      | 0.34   | 0       |
| GAIF01022812.1 | 25.35   | 29.87  | 24.83  | 49.77  | 23.15  | 8.1     |

|                |        |        |        |        |       |       |
|----------------|--------|--------|--------|--------|-------|-------|
| GAIF01022813.1 | 0      | 0      | 0      | 0.05   | 0.14  | 0     |
| GAIF01022814.1 | 20.75  | 47.01  | 14.95  | 0.87   | 0.45  | 0.48  |
| GAIF01022815.1 | 0.11   | 0      | 0      | 0.14   | 0     | 0     |
| GAIF01022816.1 | 3.01   | 0.93   | 0.79   | 5.48   | 5.16  | 7.41  |
| GAIF01022817.1 | 0.2    | 0.22   | 0.11   | 2.32   | 5.71  | 1.82  |
| GAIF01022820.1 | 3.74   | 15.61  | 14.57  | 10.58  | 3.13  | 9.51  |
| GAIF01022821.1 | 0      | 0      | 0      | 0.12   | 0.12  | 0.11  |
| GAIF01022822.1 | 3.17   | 3.29   | 2.37   | 1.84   | 0.43  | 1.19  |
| GAIF01022823.1 | 0.08   | 0      | 0      | 0      | 0.05  | 0     |
| GAIF01022824.1 | 0.15   | 1.99   | 0.32   | 1.03   | 1.38  | 0.05  |
| GAIF01022825.1 | 0      | 0      | 0      | 0      | 0     | 0.34  |
| GAIF01022826.1 | 0.39   | 0      | 0      | 1.9    | 3.89  | 0     |
| GAIF01022827.1 | 358.65 | 214.28 | 114.33 | 39.72  | 41.28 | 49.36 |
| GAIF01022828.1 | 0      | 0      | 0.08   | 0      | 0.09  | 0     |
| GAIF01022829.1 | 17.54  | 20.24  | 21.23  | 21.21  | 15.71 | 13.45 |
| GAIF01022830.1 | 0.91   | 0.33   | 0.67   | 1.41   | 0.18  | 0     |
| GAIF01022831.1 | 0      | 0      | 0      | 0      | 2.28  | 0     |
| GAIF01022832.1 | 0      | 0      | 0      | 0.1    | 0     | 0     |
| GAIF01022834.1 | 0      | 0      | 0      | 0.34   | 0     | 0     |
| GAIF01022835.1 | 0.26   | 0.24   | 0      | 1.92   | 4.81  | 0.05  |
| GAIF01022836.1 | 1.72   | 0      | 0.47   | 12.97  | 54.35 | 8.12  |
| GAIF01022838.1 | 5.79   | 8.8    | 6.49   | 4.43   | 4.44  | 2.22  |
| GAIF01022840.1 | 0.11   | 0      | 0      | 0.18   | 0.95  | 0     |
| GAIF01022841.1 | 0.61   | 1.07   | 0.36   | 5.91   | 1.09  | 0     |
| GAIF01022842.1 | 0.14   | 0      | 0      | 0      | 0     | 0     |
| GAIF01022845.1 | 6.88   | 12.75  | 14.93  | 15.6   | 6.77  | 12.06 |
| GAIF01022846.1 | 21.25  | 23.74  | 8.5    | 39.96  | 34.74 | 3.81  |
| GAIF01022847.1 | 0      | 0      | 0      | 0.1    | 0.13  | 0     |
| GAIF01022848.1 | 0      | 0      | 0      | 0.05   | 0.05  | 0     |
| GAIF01022852.1 | 0.12   | 0.17   | 0      | 0.25   | 0.24  | 0     |
| GAIF01022853.1 | 12.5   | 15.91  | 17.81  | 35.3   | 24.31 | 5.18  |
| GAIF01022856.1 | 0.41   | 0.89   | 0      | 1.6    | 1.66  | 0     |
| GAIF01022858.1 | 0.1    | 0      | 0      | 0      | 0     | 0     |
| GAIF01022860.1 | 0.86   | 1.2    | 1.82   | 7.9    | 9.2   | 3.43  |
| GAIF01022861.1 | 0      | 0      | 0.19   | 0.13   | 0.07  | 0.12  |
| GAIF01022862.1 | 0      | 0.09   | 0      | 0.67   | 2.38  | 0.18  |
| GAIF01022863.1 | 0      | 0.1    | 0      | 0      | 0     | 0     |
| GAIF01022864.1 | 8.81   | 19.35  | 3.79   | 3.81   | 1.25  | 0     |
| GAIF01022866.1 | 0      | 0      | 0      | 0      | 0.15  | 0     |
| GAIF01022867.1 | 13.81  | 23.77  | 2.23   | 106.06 | 179.3 | 3.38  |
| GAIF01022868.1 | 0      | 0      | 0      | 0      | 0.06  | 0     |
| GAIF01022869.1 | 0      | 0      | 0      | 0.1    | 0.41  | 0.22  |
| GAIF01022870.1 | 0      | 0.27   | 0      | 0      | 0.79  | 1.02  |
| GAIF01022872.1 | 15.15  | 6.04   | 4.16   | 29.1   | 35.73 | 10.63 |

|                |        |        |        |         |        |       |
|----------------|--------|--------|--------|---------|--------|-------|
| GAIF01022873.1 | 0.18   | 0.1    | 0.05   | 0.47    | 5.24   | 0.35  |
| GAIF01022874.1 | 0.25   | 0      | 0      | 0       | 0      | 0.14  |
| GAIF01022875.1 | 0      | 0      | 0      | 0       | 0.1    | 0     |
| GAIF01022876.1 | 0      | 0.84   | 0.37   | 2.53    | 2.13   | 0     |
| GAIF01022879.1 | 4.19   | 5.03   | 0.72   | 1.68    | 8.63   | 0.14  |
| GAIF01022880.1 | 13.45  | 11.7   | 14.89  | 12.49   | 12.8   | 22.3  |
| GAIF01022882.1 | 0.18   | 0      | 0      | 0.2     | 0      | 0     |
| GAIF01022883.1 | 3.99   | 5.79   | 0.32   | 9.27    | 12.99  | 0.65  |
| GAIF01022884.1 | 0.91   | 0.18   | 0      | 2.4     | 4.82   | 3.95  |
| GAIF01022886.1 | 0      | 0.1    | 0      | 0       | 0.78   | 0     |
| GAIF01022887.1 | 0      | 0      | 0      | 0       | 0.22   | 0     |
| GAIF01022888.1 | 0.17   | 0      | 0      | 0       | 0      | 0     |
| GAIF01022889.1 | 0      | 0      | 0      | 0       | 0.31   | 0     |
| GAIF01022891.1 | 0      | 0.15   | 0      | 0.36    | 1.95   | 0     |
| GAIF01022892.1 | 18.11  | 14.93  | 6.31   | 3.53    | 5.53   | 2.12  |
| GAIF01022894.1 | 0      | 0      | 0      | 0.11    | 0.19   | 0     |
| GAIF01022895.1 | 0      | 0      | 0      | 0       | 0.16   | 0.05  |
| GAIF01022896.1 | 31.81  | 46.55  | 32.12  | 177.94  | 102.24 | 11.23 |
| GAIF01022899.1 | 0      | 0.26   | 0.12   | 0       | 10.34  | 0     |
| GAIF01022900.1 | 0.18   | 0      | 0      | 0.83    | 3.21   | 0.54  |
| GAIF01022901.1 | 12.12  | 8.82   | 5.8    | 11.87   | 6.08   | 2.57  |
| GAIF01022904.1 | 0      | 0      | 0      | 0       | 0.22   | 0     |
| GAIF01022905.1 | 1.73   | 0.24   | 1.46   | 0.84    | 0.28   | 0.51  |
| GAIF01022906.1 | 171.24 | 188.19 | 223.52 | 89.3    | 74.67  | 129.7 |
| GAIF01022907.1 | 0      | 0      | 0.01   | 0       | 0      | 0     |
| GAIF01022908.1 | 5.42   | 5.46   | 4.55   | 13.88   | 15.36  | 2.58  |
| GAIF01022909.1 | 0.02   | 0      | 0      | 0.02    | 0.43   | 0     |
| GAIF01022910.1 | 0      | 3.21   | 0      | 0       | 0      | 0     |
| GAIF01022911.1 | 18.13  | 27.46  | 8.92   | 89.32   | 77.9   | 6.66  |
| GAIF01022912.1 | 0.09   | 0.2    | 0      | 0       | 0      | 0     |
| GAIF01022913.1 | 28.14  | 26.49  | 21.24  | 80.66   | 78.96  | 15.83 |
| GAIF01022914.1 | 14.12  | 5.61   | 6.72   | 19.35   | 13.23  | 15.47 |
| GAIF01022918.1 | 18.18  | 10.56  | 11.83  | 11.94   | 14.04  | 15.15 |
| GAIF01022919.1 | 0.8    | 0.87   | 0      | 5.67    | 7.57   | 2.51  |
| GAIF01022920.1 | 0.1    | 0.21   | 0      | 1.1     | 1.65   | 0.11  |
| GAIF01022922.1 | 0.07   | 0      | 0      | 0.23    | 0.8    | 1.54  |
| GAIF01022923.1 | 0      | 0      | 0      | 0.37    | 0      | 0     |
| GAIF01022924.1 | 45.29  | 51.83  | 77.92  | 101.82  | 51.95  | 27.93 |
| GAIF01022925.1 | 31.41  | 38.11  | 46.2   | 78.73   | 48.95  | 15.51 |
| GAIF01022926.1 | 2.76   | 1.59   | 1.31   | 1.08    | 0.91   | 0.52  |
| GAIF01022927.1 | 11.04  | 6.44   | 3.35   | 8.36    | 8.47   | 0.6   |
| GAIF01022928.1 | 809.11 | 45.78  | 27.9   | 1322.55 | 106.38 | 73.04 |
| GAIF01022929.1 | 0      | 0      | 0      | 0       | 0.23   | 0     |
| GAIF01022930.1 | 14.81  | 23.28  | 17.56  | 0.82    | 1      | 0.25  |

|                |        |        |        |       |        |       |
|----------------|--------|--------|--------|-------|--------|-------|
| GAIF01022931.1 | 0.99   | 0.66   | 0.08   | 2.29  | 0.55   | 0     |
| GAIF01022932.1 | 0.21   | 0.12   | 0.08   | 0.09  | 0.46   | 0     |
| GAIF01022934.1 | 0.06   | 0      | 0      | 0.21  | 1.4    | 0.03  |
| GAIF01022936.1 | 1.02   | 0.55   | 0      | 0.29  | 0.31   | 0     |
| GAIF01022937.1 | 0      | 0.06   | 0      | 0.12  | 0      | 0     |
| GAIF01022938.1 | 0.18   | 0      | 0      | 0.83  | 4.66   | 0.04  |
| GAIF01022939.1 | 161.25 | 242.6  | 160.36 | 289.9 | 244.36 | 63.9  |
| GAIF01022940.1 | 0      | 0      | 0      | 0.85  | 3.4    | 0     |
| GAIF01022942.1 | 0      | 0      | 0      | 0.2   | 4.05   | 0     |
| GAIF01022943.1 | 88.88  | 71.19  | 179.49 | 39.97 | 17.1   | 64.44 |
| GAIF01022945.1 | 0.34   | 0.12   | 0.25   | 2.66  | 8.53   | 0.76  |
| GAIF01022946.1 | 0.66   | 1.19   | 1.13   | 0.72  | 0.93   | 0.79  |
| GAIF01022947.1 | 6.85   | 10.38  | 8.08   | 40.7  | 70.22  | 1.77  |
| GAIF01022948.1 | 75.2   | 101.12 | 106.34 | 252   | 210.19 | 34.13 |
| GAIF01022951.1 | 0.15   | 0.24   | 0.58   | 0.35  | 0.09   | 0.08  |
| GAIF01022952.1 | 65.07  | 50.73  | 43.18  | 93.85 | 48.36  | 21.64 |
| GAIF01022954.1 | 0      | 1.32   | 0      | 0.55  | 0      | 0     |
| GAIF01022955.1 | 4.14   | 2.53   | 1.88   | 6.35  | 11.44  | 3.28  |
| GAIF01022957.1 | 0.54   | 0.07   | 0.39   | 9.4   | 7.13   | 47.56 |
| GAIF01022958.1 | 3.35   | 7.29   | 7.98   | 2.16  | 0.67   | 1.03  |
| GAIF01022959.1 | 26.71  | 19.6   | 27.62  | 28.74 | 12.79  | 22.15 |
| GAIF01022960.1 | 0.02   | 0.04   | 0.02   | 0.48  | 3.15   | 0.02  |
| GAIF01022963.1 | 0.08   | 0.09   | 0      | 0     | 0.2    | 0     |
| GAIF01022964.1 | 0      | 0.1    | 0.27   | 0     | 0.04   | 0.13  |
| GAIF01022965.1 | 3.15   | 4.82   | 0.57   | 1.3   | 1.49   | 0.09  |
| GAIF01022971.1 | 0      | 0.61   | 0      | 0.39  | 2.43   | 0.38  |
| GAIF01022972.1 | 1.54   | 0      | 0.37   | 2.1   | 1.23   | 0     |
| GAIF01022973.1 | 12.84  | 11.61  | 11.72  | 43.69 | 32.43  | 7.96  |
| GAIF01022976.1 | 0.25   | 0.85   | 1.06   | 0.17  | 0.13   | 0     |
| GAIF01022977.1 | 8.51   | 6.04   | 3.21   | 1.54  | 0.65   | 0.2   |
| GAIF01022978.1 | 4.81   | 1.89   | 1.47   | 12.08 | 13.96  | 7.96  |
| GAIF01022979.1 | 0      | 0      | 0      | 0.02  | 0.12   | 0     |
| GAIF01022980.1 | 0.8    | 0      | 0.79   | 2.58  | 2.39   | 0     |
| GAIF01022982.1 | 0.45   | 0.16   | 0      | 2.08  | 9.9    | 0     |
| GAIF01022983.1 | 0.3    | 0.55   | 0.44   | 0.41  | 3.15   | 1.05  |
| GAIF01022985.1 | 5.5    | 2.11   | 0.77   | 16.51 | 29.63  | 26.05 |
| GAIF01022986.1 | 3.61   | 2.43   | 2.96   | 7.91  | 12.54  | 3.75  |
| GAIF01022988.1 | 11.23  | 10.45  | 6.25   | 35.63 | 51.01  | 2.92  |
| GAIF01022989.1 | 0      | 0.13   | 0.39   | 0     | 0      | 0.4   |
| GAIF01022990.1 | 0      | 0.12   | 0.03   | 0.37  | 0.02   | 0.09  |
| GAIF01022992.1 | 0      | 0.1    | 0      | 0.11  | 0      | 0     |
| GAIF01022993.1 | 3.07   | 2.41   | 3.93   | 2.38  | 1.03   | 1.32  |
| GAIF01022994.1 | 0      | 0      | 0      | 0     | 0.47   | 0     |
| GAIF01022995.1 | 0.17   | 0      | 0.06   | 0.43  | 3.25   | 0     |

|                |       |       |        |       |       |       |
|----------------|-------|-------|--------|-------|-------|-------|
| GAIF01022996.1 | 13.74 | 8.74  | 7.89   | 19.03 | 26.76 | 23.96 |
| GAIF01022997.1 | 0     | 0     | 0      | 0     | 0     | 0.1   |
| GAIF01022999.1 | 0.88  | 0.74  | 1.31   | 0.19  | 0.14  | 0.13  |
| GAIF01023000.1 | 0     | 0.34  | 0.07   | 0.29  | 0     | 0     |
| GAIF01023001.1 | 13.74 | 3.51  | 3.15   | 12.09 | 8.97  | 7.64  |
| GAIF01023002.1 | 0     | 0.07  | 0      | 0.04  | 0.2   | 0     |
| GAIF01023003.1 | 0     | 0     | 0      | 0     | 0.1   | 0.66  |
| GAIF01023007.1 | 10.2  | 16    | 12.99  | 20.4  | 13.28 | 3.18  |
| GAIF01023009.1 | 0     | 0.15  | 0.75   | 0     | 0     | 0     |
| GAIF01023010.1 | 1.68  | 0.08  | 0      | 1.86  | 5.24  | 0.34  |
| GAIF01023011.1 | 0     | 0     | 0      | 0     | 0.09  | 0     |
| GAIF01023012.1 | 0.08  | 0.04  | 0      | 0     | 0     | 0.01  |
| GAIF01023013.1 | 4.95  | 1.03  | 0.48   | 7.86  | 13.17 | 2.49  |
| GAIF01023014.1 | 0     | 0.63  | 0.49   | 0     | 0     | 0.38  |
| GAIF01023016.1 | 0     | 0     | 0.13   | 0     | 0     | 0     |
| GAIF01023017.1 | 6.41  | 13.94 | 7.3    | 8.37  | 8.48  | 0.62  |
| GAIF01023020.1 | 9.33  | 4.89  | 8.57   | 20.97 | 22.63 | 56.18 |
| GAIF01023021.1 | 0     | 0.73  | 0.52   | 0     | 0.06  | 0.16  |
| GAIF01023022.1 | 0     | 0     | 0      | 0.11  | 0     | 0     |
| GAIF01023023.1 | 9.02  | 4.18  | 7.25   | 17    | 12.29 | 48.91 |
| GAIF01023024.1 | 0     | 0     | 0      | 1.18  | 0.14  | 0     |
| GAIF01023025.1 | 13.01 | 22.11 | 28.12  | 30.28 | 17.81 | 10.64 |
| GAIF01023027.1 | 1.9   | 3.27  | 10.87  | 11.05 | 0     | 0.68  |
| GAIF01023028.1 | 0.05  | 0     | 0      | 2.34  | 7.04  | 0.21  |
| GAIF01023030.1 | 0.14  | 0     | 0      | 1.73  | 3.51  | 0     |
| GAIF01023031.1 | 1.94  | 0.96  | 1.16   | 0.73  | 1.48  | 0.26  |
| GAIF01023032.1 | 1.77  | 1.07  | 0.43   | 6.49  | 15.81 | 0.32  |
| GAIF01023033.1 | 1.51  | 1.17  | 0      | 4.75  | 9.07  | 0.47  |
| GAIF01023034.1 | 1.33  | 0.58  | 0.42   | 1.99  | 1.56  | 0.67  |
| GAIF01023037.1 | 0.13  | 0     | 0      | 0.74  | 7.62  | 0     |
| GAIF01023038.1 | 0.08  | 0.09  | 0      | 0     | 0     | 0.23  |
| GAIF01023039.1 | 44.38 | 61.41 | 124.02 | 0     | 0     | 0     |
| GAIF01023040.1 | 7.06  | 13.13 | 8.09   | 10.37 | 4.71  | 0.35  |
| GAIF01023042.1 | 0.26  | 0.14  | 0      | 0     | 0     | 0.3   |
| GAIF01023043.1 | 0     | 0.79  | 0.79   | 0.06  | 0.07  | 0.06  |
| GAIF01023044.1 | 8.47  | 2.79  | 1.44   | 9.59  | 30.2  | 14.99 |
| GAIF01023046.1 | 0     | 0.15  | 0      | 0.16  | 0.66  | 0.15  |
| GAIF01023047.1 | 0.37  | 0.38  | 0.35   | 0.88  | 0.45  | 0.54  |
| GAIF01023048.1 | 0     | 0.19  | 0      | 0     | 0     | 0     |
| GAIF01023049.1 | 1.49  | 0.96  | 0.8    | 0.3   | 0.11  | 0     |
| GAIF01023050.1 | 0     | 0.06  | 0.06   | 0.77  | 4.45  | 0     |
| GAIF01023053.1 | 3.73  | 2.67  | 0.93   | 4.43  | 7.55  | 5.89  |
| GAIF01023055.1 | 0.1   | 0.11  | 0.05   | 1.64  | 5.11  | 0.11  |
| GAIF01023058.1 | 0.51  | 0.45  | 0.3    | 1.18  | 5.34  | 0     |

|                |       |       |       |       |       |       |
|----------------|-------|-------|-------|-------|-------|-------|
| GAIF01023060.1 | 0.26  | 0.28  | 0.08  | 0.31  | 1.57  | 0     |
| GAIF01023061.1 | 0     | 0     | 0     | 0.15  | 0     | 0     |
| GAIF01023063.1 | 0     | 0     | 0.05  | 0.25  | 0.15  | 0     |
| GAIF01023064.1 | 0.53  | 0.12  | 0.23  | 0.74  | 0     | 0.23  |
| GAIF01023066.1 | 0.69  | 0.3   | 0.15  | 0.32  | 0.66  | 0.15  |
| GAIF01023067.1 | 0     | 0     | 0     | 0.66  | 4.98  | 0.18  |
| GAIF01023068.1 | 0.03  | 0.2   | 0     | 0.25  | 1.68  | 0.01  |
| GAIF01023069.1 | 0.6   | 0.33  | 0     | 0.7   | 0.24  | 0     |
| GAIF01023072.1 | 3.75  | 0.82  | 0     | 0.87  | 1.08  | 0     |
| GAIF01023073.1 | 0.14  | 0.01  | 0.09  | 1.66  | 14.46 | 0.04  |
| GAIF01023076.1 | 0     | 0     | 0.14  | 0     | 0.23  | 0     |
| GAIF01023077.1 | 0.12  | 0     | 0.13  | 0     | 1.55  | 0.45  |
| GAIF01023078.1 | 0.08  | 0     | 0     | 0.09  | 0     | 0     |
| GAIF01023079.1 | 1.14  | 0.21  | 0     | 2.2   | 1.51  | 1.15  |
| GAIF01023080.1 | 0.7   | 0.05  | 0.48  | 0.15  | 0.1   | 0.05  |
| GAIF01023081.1 | 0     | 0     | 0     | 0.12  | 0.13  | 0     |
| GAIF01023083.1 | 10.55 | 6.52  | 11.41 | 9.86  | 3.14  | 13.26 |
| GAIF01023084.1 | 10.99 | 1.66  | 1.17  | 7.59  | 1.59  | 1.62  |
| GAIF01023085.1 | 69.06 | 38.89 | 21.26 | 44.33 | 91.07 | 4.59  |
| GAIF01023086.1 | 9.31  | 12.51 | 1.49  | 20.15 | 28.42 | 0.35  |
| GAIF01023088.1 | 0     | 0     | 0     | 0     | 0.2   | 0     |
| GAIF01023089.1 | 0.21  | 0     | 0     | 1.14  | 5.98  | 0.08  |
| GAIF01023090.1 | 33.58 | 18.52 | 13.99 | 19.58 | 9.65  | 33.96 |
| GAIF01023091.1 | 0     | 0     | 0     | 0     | 0.19  | 0     |
| GAIF01023092.1 | 0.06  | 0.09  | 0.03  | 2.44  | 0.34  | 0.15  |
| GAIF01023093.1 | 0.64  | 0.17  | 0.12  | 1.97  | 6.18  | 0.06  |
| GAIF01023094.1 | 4.89  | 0.03  | 1.8   | 16.44 | 34.53 | 0.71  |
| GAIF01023096.1 | 11.19 | 5.93  | 8     | 28.76 | 40.02 | 31    |
| GAIF01023097.1 | 4.01  | 4.24  | 6.28  | 7.43  | 5.55  | 2.56  |
| GAIF01023098.1 | 2.1   | 2.29  | 0.58  | 8.79  | 13.66 | 0.12  |
| GAIF01023099.1 | 2.76  | 1.04  | 0.53  | 11.68 | 19.64 | 2.08  |
| GAIF01023100.1 | 0.12  | 0     | 0     | 1.13  | 3.88  | 0.07  |
| GAIF01023101.1 | 0     | 0.41  | 0.95  | 0     | 0     | 0.21  |
| GAIF01023103.1 | 12.27 | 15.52 | 13.88 | 6.13  | 7.53  | 10.27 |
| GAIF01023104.1 | 0.31  | 0.33  | 0.34  | 0     | 2.78  | 0     |
| GAIF01023105.1 | 0.04  | 0.05  | 0     | 0.1   | 0.05  | 0     |
| GAIF01023106.1 | 1.09  | 0.18  | 0.24  | 0.32  | 0.29  | 0.09  |
| GAIF01023107.1 | 0     | 0     | 0     | 0.08  | 0.08  | 0     |
| GAIF01023108.1 | 0.31  | 0     | 0     | 0.18  | 0     | 0     |
| GAIF01023109.1 | 0.06  | 0.02  | 0     | 0     | 0.01  | 0     |
| GAIF01023110.1 | 0     | 0     | 0     | 0     | 0.05  | 0     |
| GAIF01023112.1 | 2.49  | 0.46  | 0     | 0     | 0     | 0     |
| GAIF01023114.1 | 7.06  | 11.07 | 9.95  | 15.77 | 8.14  | 4.54  |
| GAIF01023115.1 | 1.19  | 0.18  | 0     | 2.77  | 6.45  | 5.93  |



|                |        |        |        |        |        |        |
|----------------|--------|--------|--------|--------|--------|--------|
| GAIF01023117.1 | 0.09   | 0.24   | 0.15   | 0.05   | 0.7    | 0      |
| GAIF01023118.1 | 0      | 0      | 0      | 0.15   | 0.16   | 0      |
| GAIF01023119.1 | 0      | 0      | 0      | 0      | 0.43   | 0      |
| GAIF01023120.1 | 2.1    | 0.76   | 0.51   | 4.48   | 10.55  | 3.09   |
| GAIF01023121.1 | 0.86   | 1.84   | 0.17   | 5.6    | 8.46   | 0.26   |
| GAIF01023123.1 | 0      | 0      | 0      | 0      | 0.63   | 0      |
| GAIF01023124.1 | 2.71   | 3.02   | 1.58   | 11.72  | 13.74  | 1.3    |
| GAIF01023125.1 | 6.08   | 6.03   | 9.16   | 5.22   | 6.51   | 7.35   |
| GAIF01023126.1 | 9.38   | 8.74   | 13.71  | 23.65  | 29.63  | 7.27   |
| GAIF01023127.1 | 0.29   | 0.1    | 0      | 0.73   | 4.92   | 0.44   |
| GAIF01023128.1 | 12.98  | 17.13  | 15.89  | 26.27  | 14.57  | 5.15   |
| GAIF01023129.1 | 0      | 0.07   | 0      | 0      | 0.11   | 0      |
| GAIF01023130.1 | 0.18   | 0.26   | 0.07   | 0.31   | 0      | 0.07   |
| GAIF01023131.1 | 306.61 | 281.56 | 103.78 | 189.85 | 180.43 | 16.49  |
| GAIF01023132.1 | 0      | 0      | 0      | 0      | 0.09   | 0      |
| GAIF01023133.1 | 0      | 0      | 0      | 0      | 0.05   | 0      |
| GAIF01023134.1 | 60.33  | 64.24  | 75.73  | 69.45  | 46.76  | 40.21  |
| GAIF01023135.1 | 0      | 0      | 0      | 0      | 0.67   | 0      |
| GAIF01023136.1 | 0.2    | 0.04   | 0.04   | 0.54   | 1.92   | 0.09   |
| GAIF01023137.1 | 3.15   | 1.47   | 2.29   | 1.22   | 1.18   | 0.91   |
| GAIF01023138.1 | 40.94  | 20.63  | 18.35  | 42.47  | 30.7   | 13.25  |
| GAIF01023140.1 | 15.12  | 32.77  | 2.76   | 57.88  | 101.71 | 3.42   |
| GAIF01023141.1 | 16.28  | 7.52   | 2.65   | 5.03   | 8.49   | 3.38   |
| GAIF01023143.1 | 0.14   | 0      | 0      | 0.16   | 0.33   | 0      |
| GAIF01023145.1 | 40.31  | 26.23  | 38.44  | 35.37  | 15.37  | 35.09  |
| GAIF01023146.1 | 21.55  | 26.55  | 20.89  | 38.04  | 25.34  | 17.23  |
| GAIF01023147.1 | 190.18 | 144.88 | 68.56  | 78.52  | 45.89  | 15.96  |
| GAIF01023148.1 | 0      | 0.28   | 0.35   | 0      | 0.08   | 0.64   |
| GAIF01023149.1 | 0.92   | 1.13   | 0.7    | 5.46   | 5.8    | 0.57   |
| GAIF01023150.1 | 0.09   | 0.07   | 0      | 0      | 0      | 0.13   |
| GAIF01023151.1 | 0.31   | 0      | 0.23   | 2.18   | 7.28   | 2.3    |
| GAIF01023153.1 | 0      | 0      | 0      | 0.04   | 0      | 0      |
| GAIF01023154.1 | 0      | 0      | 0      | 0.07   | 0.15   | 0      |
| GAIF01023155.1 | 11.57  | 19.08  | 16.43  | 25.15  | 14.72  | 6.26   |
| GAIF01023156.1 | 0.4    | 0.26   | 0.26   | 0.28   | 0.29   | 0      |
| GAIF01023157.1 | 0      | 0      | 0.02   | 0.01   | 0      | 0      |
| GAIF01023158.1 | 0.5    | 0.14   | 0      | 1.02   | 4.83   | 0      |
| GAIF01023159.1 | 27.94  | 29.29  | 25.4   | 84.22  | 42.61  | 8.71   |
| GAIF01023161.1 | 411.66 | 383.59 | 442.33 | 183.38 | 119.62 | 125.57 |
| GAIF01023162.1 | 0      | 0      | 0      | 0.08   | 0      | 0      |
| GAIF01023163.1 | 0      | 0      | 0.25   | 0      | 0.09   | 0.33   |
| GAIF01023164.1 | 3.54   | 0.57   | 0.14   | 19.2   | 51     | 8.54   |
| GAIF01023166.1 | 0      | 0.14   | 0.24   | 0.05   | 0      | 0      |
| GAIF01023168.1 | 0      | 0      | 0      | 0      | 0      | 0.53   |

|                |        |       |       |       |        |       |
|----------------|--------|-------|-------|-------|--------|-------|
| GAIF01023170.1 | 26.46  | 16.31 | 5.71  | 50.94 | 115.87 | 3.58  |
| GAIF01023171.1 | 0      | 0     | 0     | 0.14  | 0      | 0     |
| GAIF01023172.1 | 0      | 0.07  | 0     | 0     | 0.23   | 0     |
| GAIF01023175.1 | 49.51  | 33.96 | 13.38 | 16.07 | 6.66   | 0.24  |
| GAIF01023177.1 | 0.23   | 0.24  | 0     | 0.26  | 1.9    | 0.08  |
| GAIF01023178.1 | 4.14   | 5.32  | 0.59  | 4.02  | 2.72   | 0.03  |
| GAIF01023182.1 | 0.62   | 0.15  | 0.24  | 0.72  | 1.97   | 0.05  |
| GAIF01023185.1 | 0      | 1.71  | 2.64  | 0     | 0.13   | 0.35  |
| GAIF01023187.1 | 2.07   | 1.78  | 0.87  | 0.95  | 0.55   | 0     |
| GAIF01023188.1 | 0      | 0     | 0     | 0     | 0.1    | 0     |
| GAIF01023189.1 | 0      | 0     | 0     | 0     | 0.03   | 0     |
| GAIF01023191.1 | 3.82   | 2.3   | 0.58  | 15.52 | 17.97  | 0.2   |
| GAIF01023192.1 | 1.1    | 0     | 0.09  | 8.92  | 29.2   | 0     |
| GAIF01023195.1 | 0.25   | 1.21  | 3.18  | 0     | 0.23   | 1.44  |
| GAIF01023196.1 | 13.5   | 18.47 | 13.75 | 33.4  | 32.91  | 3.64  |
| GAIF01023197.1 | 0      | 0     | 0     | 0.15  | 3.11   | 0.16  |
| GAIF01023198.1 | 0      | 0     | 0.14  | 0     | 0      | 0.25  |
| GAIF01023200.1 | 0.05   | 0.1   | 0.06  | 0     | 0      | 0     |
| GAIF01023202.1 | 73.1   | 35.18 | 3.58  | 12.7  | 10.48  | 0.94  |
| GAIF01023203.1 | 1.62   | 2.91  | 0.39  | 9.14  | 12.01  | 0.16  |
| GAIF01023204.1 | 0      | 0.37  | 0     | 0     | 0      | 0     |
| GAIF01023205.1 | 35.25  | 19.22 | 17.95 | 55.86 | 37.23  | 26.37 |
| GAIF01023208.1 | 0.59   | 0     | 0     | 0.34  | 1.41   | 0.43  |
| GAIF01023209.1 | 0.38   | 0.1   | 0     | 0.11  | 0.23   | 0     |
| GAIF01023210.1 | 0.47   | 0.32  | 0.17  | 0.25  | 0      | 0     |
| GAIF01023211.1 | 8.69   | 0     | 0.42  | 0.43  | 0      | 12.23 |
| GAIF01023212.1 | 20.28  | 32.73 | 32.94 | 63.14 | 52.34  | 14.44 |
| GAIF01023213.1 | 0.89   | 0     | 0     | 0     | 0.15   | 0     |
| GAIF01023214.1 | 1.52   | 1.05  | 0.23  | 8.81  | 23.37  | 0.32  |
| GAIF01023216.1 | 0.71   | 0     | 0     | 0.79  | 4.73   | 2.18  |
| GAIF01023219.1 | 10.94  | 10.06 | 11.37 | 23.23 | 31.13  | 15.22 |
| GAIF01023221.1 | 101.19 | 65.95 | 14    | 12.22 | 7.67   | 2.45  |
| GAIF01023222.1 | 0      | 0.1   | 0     | 0     | 0      | 0     |
| GAIF01023224.1 | 0      | 0.68  | 0.6   | 0     | 0.09   | 0.26  |
| GAIF01023225.1 | 1.66   | 1.45  | 2.26  | 1     | 0.88   | 1.61  |
| GAIF01023226.1 | 2.69   | 1.58  | 1.59  | 3.36  | 6.72   | 1.26  |
| GAIF01023227.1 | 0      | 0.05  | 0     | 0     | 0.05   | 0     |
| GAIF01023228.1 | 1.17   | 0.29  | 2.01  | 1.29  | 0.86   | 1.11  |
| GAIF01023232.1 | 0.99   | 1.26  | 9.39  | 8.53  | 0      | 3.43  |
| GAIF01023234.1 | 8.86   | 6.27  | 5.28  | 11.15 | 4.12   | 63.88 |
| GAIF01023236.1 | 0      | 0     | 0     | 0.41  | 1.48   | 0     |
| GAIF01023238.1 | 0.58   | 0.58  | 0.52  | 0.12  | 0.13   | 0.29  |
| GAIF01023239.1 | 0      | 0     | 0     | 0     | 0.1    | 0     |
| GAIF01023240.1 | 14.99  | 12.22 | 4.11  | 17.39 | 9.01   | 53.67 |

|                |        |       |       |        |        |        |
|----------------|--------|-------|-------|--------|--------|--------|
| GAIF01023244.1 | 259.14 | 69.18 | 6.13  | 791.18 | 819.02 | 46.69  |
| GAIF01023245.1 | 0      | 0     | 0     | 0.05   | 0.05   | 0      |
| GAIF01023246.1 | 0.13   | 0.39  | 0.42  | 0.15   | 0.25   | 0.09   |
| GAIF01023249.1 | 0.34   | 0.14  | 0     | 0.94   | 7.26   | 0.69   |
| GAIF01023250.1 | 31.46  | 28.35 | 48.48 | 111.17 | 131.29 | 73.98  |
| GAIF01023251.1 | 0.25   | 0     | 0     | 0.13   | 0.47   | 0.06   |
| GAIF01023252.1 | 0.48   | 0     | 0     | 1.51   | 2.32   | 0      |
| GAIF01023254.1 | 0.59   | 0.07  | 0     | 0.53   | 0.23   | 0.14   |
| GAIF01023255.1 | 0.31   | 0     | 0     | 0.36   | 0.37   | 0      |
| GAIF01023259.1 | 0      | 0.08  | 0     | 0      | 0.05   | 0      |
| GAIF01023260.1 | 11.83  | 8.64  | 1.27  | 36.29  | 65.42  | 6.12   |
| GAIF01023261.1 | 17.24  | 8.49  | 3.93  | 11.44  | 18.18  | 70.79  |
| GAIF01023262.1 | 1.42   | 0.47  | 0.24  | 5.51   | 10.92  | 0      |
| GAIF01023264.1 | 0      | 0     | 0     | 0.39   | 0.31   | 0      |
| GAIF01023267.1 | 0      | 0     | 0     | 0.65   | 0.45   | 0      |
| GAIF01023268.1 | 0      | 0     | 0     | 0      | 0.04   | 0      |
| GAIF01023269.1 | 40.67  | 57.19 | 41.43 | 59.59  | 72.78  | 48.42  |
| GAIF01023271.1 | 0.73   | 0.79  | 1.59  | 0.17   | 0.17   | 0.32   |
| GAIF01023272.1 | 229.35 | 283   | 109   | 254.83 | 168.84 | 12.54  |
| GAIF01023273.1 | 0.19   | 0.1   | 0     | 0.22   | 0.91   | 0.1    |
| GAIF01023275.1 | 0      | 0     | 0     | 0.63   | 2.9    | 0      |
| GAIF01023276.1 | 0      | 0     | 0     | 0.05   | 0.17   | 0      |
| GAIF01023277.1 | 0.19   | 0.16  | 0.08  | 0.65   | 0.62   | 0.63   |
| GAIF01023278.1 | 1.83   | 3.97  | 5.32  | 4.68   | 0      | 2.1    |
| GAIF01023279.1 | 0.11   | 0.12  | 0     | 0.78   | 4.16   | 0      |
| GAIF01023280.1 | 0      | 0     | 0     | 0.37   | 1.15   | 0.09   |
| GAIF01023282.1 | 150.11 | 52.11 | 20.58 | 0.45   | 0.91   | 0.19   |
| GAIF01023285.1 | 0.94   | 4.59  | 14.07 | 1.09   | 8.46   | 274.45 |
| GAIF01023286.1 | 0.58   | 0     | 0     | 2.69   | 7.67   | 0.85   |
| GAIF01023287.1 | 0      | 2.33  | 7.18  | 0      | 0      | 1.18   |
| GAIF01023288.1 | 61.51  | 87.28 | 38.99 | 112.14 | 125.37 | 19.92  |
| GAIF01023289.1 | 0.71   | 0.44  | 0     | 0.7    | 0.36   | 0      |
| GAIF01023290.1 | 0.09   | 0.48  | 0.53  | 2.44   | 14.8   | 0.1    |
| GAIF01023291.1 | 3.44   | 1.63  | 0.16  | 5.34   | 3.62   | 0.11   |
| GAIF01023292.1 | 6.21   | 17.67 | 8.01  | 32.9   | 39.01  | 2.48   |
| GAIF01023293.1 | 11.55  | 3.29  | 5.92  | 1.13   | 0      | 0      |
| GAIF01023294.1 | 0.35   | 0.24  | 0.57  | 0.13   | 0.26   | 0.06   |
| GAIF01023295.1 | 15.71  | 12.13 | 9.9   | 20.62  | 30.6   | 11.31  |
| GAIF01023296.1 | 0      | 0.1   | 0     | 0      | 0      | 0      |
| GAIF01023297.1 | 12.99  | 1.21  | 0.85  | 14.3   | 31.77  | 41.23  |
| GAIF01023298.1 | 13.4   | 11.75 | 6.16  | 28.09  | 14.14  | 1.51   |
| GAIF01023300.1 | 4.75   | 5.56  | 6.64  | 8.95   | 2.54   | 3.49   |
| GAIF01023301.1 | 1.7    | 0     | 0     | 3.25   | 7.57   | 4.4    |
| GAIF01023302.1 | 0.09   | 0.48  | 0.05  | 0.15   | 0.05   | 0      |

|                |        |        |        |        |         |         |
|----------------|--------|--------|--------|--------|---------|---------|
| GAIF01023304.1 | 0.01   | 0      | 0      | 0.04   | 0.21    | 0       |
| GAIF01023305.1 | 0      | 0      | 0      | 0      | 0.45    | 0       |
| GAIF01023306.1 | 0.21   | 0      | 0      | 0.25   | 0       | 0       |
| GAIF01023307.1 | 93.49  | 181.26 | 108.36 | 108.26 | 211.2   | 70.92   |
| GAIF01023309.1 | 1.09   | 0.23   | 0.24   | 1.5    | 1.02    | 0.72    |
| GAIF01023313.1 | 8.26   | 8.36   | 0.93   | 53.08  | 107.91  | 0.56    |
| GAIF01023314.1 | 16.5   | 22.1   | 21.72  | 57.63  | 45.11   | 20.54   |
| GAIF01023318.1 | 0.64   | 0      | 0.28   | 0      | 0.15    | 0.14    |
| GAIF01023322.1 | 4.99   | 2.51   | 1.86   | 16.27  | 63.24   | 7.19    |
| GAIF01023323.1 | 0.2    | 0.33   | 0      | 0.2    | 0       | 0       |
| GAIF01023326.1 | 2.13   | 3.03   | 0.54   | 12.96  | 23.89   | 0.54    |
| GAIF01023327.1 | 0.14   | 0.19   | 0.08   | 0.37   | 6.14    | 0.12    |
| GAIF01023329.1 | 13.66  | 11.8   | 16.94  | 25.7   | 14.29   | 12.94   |
| GAIF01023330.1 | 39.66  | 38.59  | 42.88  | 159.5  | 80.04   | 47.15   |
| GAIF01023332.1 | 8.72   | 12.05  | 4.65   | 6.73   | 6.72    | 1.45    |
| GAIF01023336.1 | 3.57   | 1.74   | 0.95   | 2.71   | 11.54   | 13.82   |
| GAIF01023337.1 | 14.77  | 16.09  | 14.22  | 13.38  | 12.27   | 4.46    |
| GAIF01023338.1 | 0      | 0.09   | 0      | 0.32   | 0.86    | 0       |
| GAIF01023339.1 | 0      | 0      | 0      | 0.31   | 0.54    | 0       |
| GAIF01023340.1 | 0.59   | 0      | 0.09   | 0.22   | 0.39    | 1.79    |
| GAIF01023341.1 | 1.42   | 0.44   | 0.2    | 3.1    | 2.75    | 0.05    |
| GAIF01023343.1 | 805.71 | 298.46 | 379.57 | 650.61 | 1238.94 | 9975.59 |
| GAIF01023344.1 | 77.66  | 146.28 | 143.74 | 150.56 | 125.88  | 25.19   |
| GAIF01023347.1 | 0      | 0      | 0      | 0.11   | 0.23    | 0       |
| GAIF01023348.1 | 0.06   | 0      | 0      | 0.37   | 2.33    | 0.14    |
| GAIF01023349.1 | 1.48   | 3.58   | 2.42   | 9.9    | 15.35   | 2.32    |
| GAIF01023350.1 | 0.34   | 0.37   | 0.19   | 3.64   | 20.7    | 0.38    |
| GAIF01023351.1 | 19.45  | 18.34  | 22.66  | 15.76  | 37.28   | 55.91   |
| GAIF01023352.1 | 0.6    | 0.13   | 0      | 0.97   | 4.04    | 4.76    |
| GAIF01023353.1 | 0.54   | 0.37   | 0.35   | 0.27   | 0.75    | 0.24    |
| GAIF01023355.1 | 0.64   | 1.19   | 0.66   | 7.89   | 1.13    | 1.13    |
| GAIF01023357.1 | 22.83  | 18.33  | 21.35  | 29.81  | 45.53   | 60.31   |
| GAIF01023359.1 | 0.02   | 0      | 0.25   | 0.71   | 2.39    | 0.64    |
| GAIF01023360.1 | 8.17   | 8.09   | 4.01   | 5.31   | 3.11    | 0.5     |
| GAIF01023361.1 | 5.91   | 8.31   | 13.58  | 11.29  | 5.51    | 8.34    |
| GAIF01023362.1 | 0.32   | 0.12   | 0.12   | 2.58   | 23.6    | 2.57    |
| GAIF01023363.1 | 28.13  | 47.14  | 10.35  | 167.69 | 176.33  | 6.35    |
| GAIF01023364.1 | 24.34  | 13.59  | 13.55  | 28.2   | 9.68    | 12.3    |
| GAIF01023365.1 | 19.09  | 24.29  | 3.26   | 30.38  | 85.39   | 16.5    |
| GAIF01023366.1 | 0.52   | 0.19   | 0      | 1.82   | 4.74    | 0.1     |
| GAIF01023367.1 | 0.3    | 0.5    | 0.46   | 0.53   | 0.26    | 0.17    |
| GAIF01023368.1 | 0      | 0.16   | 0.08   | 0.78   | 3.86    | 0       |
| GAIF01023369.1 | 1.61   | 0.61   | 0.71   | 0.84   | 0.29    | 0       |
| GAIF01023370.1 | 0.07   | 0      | 0      | 0      | 0       | 0       |

|                |       |       |       |       |        |       |
|----------------|-------|-------|-------|-------|--------|-------|
| GAIF01023371.1 | 8.8   | 9.46  | 20.99 | 32.52 | 28.71  | 23.08 |
| GAIF01023372.1 | 36.05 | 47.68 | 49.64 | 62.4  | 55.67  | 19.06 |
| GAIF01023373.1 | 0     | 0.07  | 0     | 0     | 0      | 0     |
| GAIF01023374.1 | 0     | 0.03  | 0     | 0     | 0.09   | 0     |
| GAIF01023375.1 | 0.06  | 0     | 0     | 0.38  | 0.78   | 0.28  |
| GAIF01023377.1 | 0.19  | 0     | 0     | 0     | 0      | 0     |
| GAIF01023379.1 | 0     | 0     | 0     | 0     | 0.25   | 0     |
| GAIF01023381.1 | 0.03  | 0.02  | 0     | 0.05  | 0.07   | 0     |
| GAIF01023382.1 | 0     | 0     | 0     | 0     | 0.18   | 0     |
| GAIF01023383.1 | 13.7  | 19.5  | 23.43 | 26.35 | 17.21  | 10.27 |
| GAIF01023385.1 | 0     | 0     | 0     | 0.31  | 0.3    | 0     |
| GAIF01023387.1 | 0     | 0.21  | 0.11  | 0     | 0      | 0     |
| GAIF01023388.1 | 0     | 0     | 0     | 0.61  | 3.82   | 0.58  |
| GAIF01023390.1 | 0     | 0     | 0     | 0.23  | 0.66   | 0.15  |
| GAIF01023391.1 | 47.49 | 34.7  | 72.12 | 0.61  | 0.49   | 1.64  |
| GAIF01023392.1 | 6.57  | 8.22  | 3.7   | 28.98 | 38.82  | 1.54  |
| GAIF01023394.1 | 12.82 | 6.39  | 5.46  | 31.32 | 24.1   | 8.01  |
| GAIF01023400.1 | 0.04  | 0.3   | 0.75  | 0     | 0      | 0.04  |
| GAIF01023401.1 | 32.93 | 30.11 | 20.24 | 37.06 | 19.83  | 14.22 |
| GAIF01023403.1 | 5.27  | 5.55  | 3.5   | 11.79 | 16.38  | 2.24  |
| GAIF01023406.1 | 1.53  | 1.14  | 0.21  | 5.16  | 11.6   | 0.33  |
| GAIF01023407.1 | 1.81  | 0     | 0.12  | 3.28  | 10.32  | 10.2  |
| GAIF01023408.1 | 6.46  | 4.02  | 5.32  | 1.21  | 0.42   | 0.13  |
| GAIF01023409.1 | 1.01  | 0.36  | 0.1   | 11.89 | 32.26  | 3.26  |
| GAIF01023410.1 | 0     | 0.21  | 0     | 0     | 0.23   | 0     |
| GAIF01023411.1 | 0     | 0.26  | 0     | 0     | 0      | 0     |
| GAIF01023413.1 | 1.38  | 2.45  | 1.1   | 2.36  | 3.05   | 0.41  |
| GAIF01023414.1 | 23.72 | 14.31 | 9.99  | 93.04 | 64.02  | 12.49 |
| GAIF01023415.1 | 0     | 0     | 0     | 0.1   | 0.63   | 0.14  |
| GAIF01023416.1 | 0     | 0     | 0     | 0.08  | 0      | 0     |
| GAIF01023417.1 | 0.06  | 0     | 0     | 0     | 0      | 0     |
| GAIF01023418.1 | 0.22  | 0.12  | 0.12  | 0.26  | 0      | 0     |
| GAIF01023419.1 | 18.28 | 17.22 | 3.59  | 59.79 | 73.86  | 1.9   |
| GAIF01023421.1 | 4.26  | 3.6   | 0.52  | 64.03 | 135.54 | 2.61  |
| GAIF01023424.1 | 3.24  | 4.46  | 0.82  | 1.73  | 2.39   | 0.41  |
| GAIF01023425.1 | 0     | 0.41  | 0.24  | 0.3   | 0      | 0.18  |
| GAIF01023428.1 | 0     | 0     | 0     | 0     | 0.33   | 0     |
| GAIF01023429.1 | 12.27 | 8.25  | 1.7   | 5.84  | 8.58   | 8.55  |
| GAIF01023430.1 | 21.81 | 11.51 | 3.91  | 45.33 | 50.18  | 12.07 |
| GAIF01023431.1 | 0.93  | 0.28  | 0.67  | 2.72  | 3.86   | 0.57  |
| GAIF01023432.1 | 0.45  | 0.07  | 0     | 1.27  | 5.26   | 0.57  |
| GAIF01023433.1 | 0.31  | 0     | 0     | 0     | 0.13   | 0     |
| GAIF01023434.1 | 3.88  | 0.27  | 0     | 11.46 | 17.29  | 17.5  |
| GAIF01023437.1 | 5.03  | 2.59  | 11    | 0     | 0      | 0     |

|                |        |        |        |        |         |        |
|----------------|--------|--------|--------|--------|---------|--------|
| GAIF01023438.1 | 0      | 0.14   | 0      | 0.62   | 0.66    | 0      |
| GAIF01023441.1 | 0      | 0.15   | 0      | 0      | 0.51    | 0      |
| GAIF01023442.1 | 36     | 11.49  | 16.87  | 14.64  | 8.05    | 21.07  |
| GAIF01023443.1 | 0.01   | 0.05   | 0.03   | 0      | 0       | 0      |
| GAIF01023444.1 | 28.03  | 13.74  | 25.74  | 36.69  | 18.8    | 52.59  |
| GAIF01023446.1 | 14.14  | 17.27  | 24.83  | 35.5   | 20.72   | 12     |
| GAIF01023447.1 | 679.42 | 530.27 | 166.24 | 962.67 | 1043.92 | 181.91 |
| GAIF01023449.1 | 0.81   | 0.16   | 0.48   | 4.35   | 1.59    | 0.57   |
| GAIF01023452.1 | 0      | 0.12   | 0.24   | 0.13   | 0       | 0      |
| GAIF01023454.1 | 0.6    | 0.37   | 0.19   | 3.96   | 9.63    | 0.09   |
| GAIF01023456.1 | 68.64  | 65.09  | 48.82  | 150.89 | 64.49   | 21.64  |
| GAIF01023458.1 | 9.78   | 10.34  | 12.95  | 38.89  | 40.8    | 10.13  |
| GAIF01023459.1 | 0      | 0      | 0      | 0.11   | 0       | 0      |
| GAIF01023461.1 | 0      | 0      | 9.77   | 0      | 7.27    | 0      |
| GAIF01023462.1 | 0.2    | 0      | 0.34   | 0      | 0       | 0      |
| GAIF01023463.1 | 7.78   | 12.78  | 3.95   | 25.9   | 24.71   | 1.83   |
| GAIF01023466.1 | 0      | 0      | 0      | 0.41   | 0.43    | 0      |
| GAIF01023467.1 | 13.2   | 7.79   | 7.78   | 12.61  | 5.81    | 7.45   |
| GAIF01023468.1 | 0      | 0      | 0      | 0.21   | 1.53    | 0      |
| GAIF01023469.1 | 25.86  | 38.25  | 22.58  | 62.87  | 68.61   | 36.2   |
| GAIF01023473.1 | 0.11   | 0.12   | 0.06   | 0.25   | 3.44    | 0.65   |
| GAIF01023474.1 | 46.69  | 118.85 | 102.76 | 56.19  | 42.44   | 4.74   |
| GAIF01023476.1 | 0      | 0.16   | 0      | 2.91   | 12.95   | 0.11   |
| GAIF01023477.1 | 0.59   | 0.32   | 0.11   | 0.91   | 2.6     | 0.22   |
| GAIF01023478.1 | 0      | 0      | 0      | 1.04   | 0.87    | 0      |
| GAIF01023479.1 | 0      | 0      | 0.07   | 0.08   | 0.24    | 0      |
| GAIF01023480.1 | 0.23   | 0.06   | 0      | 0.2    | 0.28    | 0      |
| GAIF01023484.1 | 0.03   | 0.06   | 0      | 0.19   | 0.33    | 0.03   |
| GAIF01023485.1 | 2.01   | 3.47   | 2.4    | 3.12   | 11.71   | 4.81   |
| GAIF01023486.1 | 18.15  | 19.7   | 10.17  | 11.72  | 12.86   | 2.41   |
| GAIF01023487.1 | 32.64  | 36.1   | 58.84  | 68.12  | 31.33   | 31.04  |
| GAIF01023488.1 | 0.6    | 0.16   | 0.05   | 3.28   | 16.65   | 0.06   |
| GAIF01023489.1 | 6.15   | 6.68   | 6.21   | 21.97  | 24.29   | 14.19  |
| GAIF01023490.1 | 19.82  | 18.75  | 30.34  | 51.1   | 31.88   | 29.33  |
| GAIF01023491.1 | 0.06   | 0.13   | 0      | 0      | 0.07    | 0.2    |
| GAIF01023493.1 | 0.64   | 0.43   | 0.71   | 0.74   | 0.59    | 0.25   |
| GAIF01023494.1 | 0.34   | 0.26   | 0.48   | 1.3    | 0.3     | 0      |
| GAIF01023495.1 | 54.13  | 120.59 | 4.36   | 26.35  | 50.96   | 13.78  |
| GAIF01023501.1 | 0      | 0      | 0      | 0.14   | 0.15    | 0      |
| GAIF01023502.1 | 3.67   | 0.88   | 0.89   | 13.2   | 15.84   | 2.86   |
| GAIF01023503.1 | 0.04   | 0      | 0      | 0      | 0       | 0      |
| GAIF01023504.1 | 0      | 0      | 0      | 0      | 0.14    | 0      |
| GAIF01023505.1 | 1.09   | 0.79   | 0.24   | 5.04   | 12.94   | 0      |
| GAIF01023506.1 | 0.21   | 0      | 0      | 1.55   | 5.43    | 0.45   |

|                |        |        |        |        |        |        |
|----------------|--------|--------|--------|--------|--------|--------|
| GAIF01023508.1 | 3.93   | 2.95   | 0      | 0      | 0      | 0.29   |
| GAIF01023509.1 | 8.98   | 20.99  | 14.31  | 21.27  | 20.41  | 1.9    |
| GAIF01023510.1 | 3.69   | 4.9    | 2.06   | 6.67   | 9.81   | 0.55   |
| GAIF01023511.1 | 0.27   | 0.59   | 0      | 0.76   | 0.37   | 0      |
| GAIF01023512.1 | 49.98  | 15.23  | 23.32  | 31.09  | 29.33  | 31.79  |
| GAIF01023513.1 | 0      | 0      | 0      | 0.74   | 2.99   | 1.77   |
| GAIF01023515.1 | 4.95   | 10.06  | 3.22   | 6.56   | 9.44   | 0.5    |
| GAIF01023516.1 | 0.65   | 0.7    | 0.27   | 2.44   | 6.91   | 0.09   |
| GAIF01023517.1 | 30.51  | 26.74  | 17.43  | 55.25  | 61.09  | 34.2   |
| GAIF01023519.1 | 0.28   | 0.31   | 0.21   | 0.76   | 0.34   | 0.1    |
| GAIF01023520.1 | 6.28   | 8.32   | 8.23   | 27.39  | 27.05  | 6.98   |
| GAIF01023521.1 | 0      | 0      | 0      | 0      | 0.22   | 0      |
| GAIF01023522.1 | 1.08   | 0      | 0      | 0.23   | 0.66   | 0      |
| GAIF01023523.1 | 0      | 0.03   | 0      | 0      | 0      | 0      |
| GAIF01023524.1 | 4.82   | 2.69   | 3.64   | 7.18   | 14.33  | 3.83   |
| GAIF01023525.1 | 13.73  | 6.74   | 5.42   | 18.08  | 22.99  | 4.1    |
| GAIF01023527.1 | 103.53 | 36.67  | 10.7   | 18.01  | 10.22  | 1.69   |
| GAIF01023529.1 | 40.04  | 28.98  | 30.86  | 2.01   | 1.48   | 3.07   |
| GAIF01023530.1 | 0      | 0      | 0      | 0      | 0.24   | 0.11   |
| GAIF01023531.1 | 195.18 | 279.59 | 455.21 | 264.52 | 197    | 196.96 |
| GAIF01023535.1 | 0.21   | 0.23   | 0      | 0.3    | 0.13   | 0      |
| GAIF01023536.1 | 0.08   | 0      | 0      | 0.48   | 2.47   | 0.36   |
| GAIF01023537.1 | 0      | 0      | 0      | 0      | 0.72   | 0      |
| GAIF01023538.1 | 1.32   | 0.08   | 1.38   | 0.16   | 0.01   | 1.32   |
| GAIF01023539.1 | 5.5    | 7.58   | 6.45   | 16.33  | 11.25  | 1.62   |
| GAIF01023540.1 | 1.05   | 0.08   | 0.08   | 4.6    | 29.76  | 3.79   |
| GAIF01023541.1 | 0.03   | 0      | 0.03   | 0.03   | 0.03   | 0      |
| GAIF01023542.1 | 231.9  | 115.87 | 145    | 288.05 | 106.76 | 157.04 |
| GAIF01023543.1 | 0.15   | 0.49   | 0      | 0      | 0.75   | 0      |
| GAIF01023547.1 | 0      | 0.13   | 0.27   | 0      | 0.15   | 0      |
| GAIF01023548.1 | 0.23   | 0.12   | 0.25   | 0.13   | 2.34   | 0.13   |
| GAIF01023549.1 | 0      | 0      | 0      | 0      | 0.01   | 0      |
| GAIF01023550.1 | 0.15   | 0.42   | 1.6    | 0.09   | 0      | 0.25   |
| GAIF01023552.1 | 0.03   | 0      | 0      | 0.04   | 0      | 0      |
| GAIF01023554.1 | 12.58  | 19.55  | 19.06  | 24.05  | 13.9   | 5.89   |
| GAIF01023555.1 | 2.98   | 3.46   | 1.05   | 21.46  | 39.16  | 1.5    |
| GAIF01023556.1 | 6.56   | 2.19   | 0      | 2.58   | 1.11   | 0.25   |
| GAIF01023557.1 | 0      | 0      | 0      | 0      | 0.09   | 0      |
| GAIF01023558.1 | 1.55   | 2.92   | 3.62   | 1.8    | 1.36   | 0.68   |
| GAIF01023561.1 | 0      | 0      | 0      | 0      | 0.1    | 0      |
| GAIF01023562.1 | 0      | 0.14   | 0      | 0      | 1.11   | 0      |
| GAIF01023563.1 | 24.03  | 13.25  | 7.38   | 54.06  | 65.06  | 13.56  |
| GAIF01023564.1 | 148.15 | 131.41 | 56.2   | 243.53 | 292.19 | 94.49  |
| GAIF01023567.1 | 0.96   | 0.83   | 0      | 4.99   | 15.52  | 0.11   |

|                |         |         |         |         |         |         |
|----------------|---------|---------|---------|---------|---------|---------|
| GAIF01023568.1 | 0       | 0       | 0.45    | 0.87    | 0       | 0       |
| GAIF01023570.1 | 22.6    | 132.05  | 56.18   | 4.78    | 15.82   | 4.27    |
| GAIF01023571.1 | 8       | 5.5     | 10.54   | 26.21   | 18.74   | 14.49   |
| GAIF01023572.1 | 7.42    | 2.86    | 8.19    | 105.44  | 96.39   | 8.25    |
| GAIF01023573.1 | 492.58  | 458.63  | 403.81  | 946.72  | 1170.49 | 3490.42 |
| GAIF01023574.1 | 0.17    | 0.06    | 0       | 1.44    | 2.64    | 3.01    |
| GAIF01023576.1 | 0       | 0.07    | 0       | 0       | 0       | 0       |
| GAIF01023577.1 | 0       | 0       | 0       | 0.18    | 1.2     | 0       |
| GAIF01023578.1 | 2686.18 | 1749.28 | 2547.99 | 1003.14 | 282.7   | 319.8   |
| GAIF01023580.1 | 62.2    | 6.21    | 0.67    | 5.69    | 23.82   | 1.81    |
| GAIF01023581.1 | 17.94   | 20.75   | 20.76   | 67.67   | 40.73   | 22.82   |
| GAIF01023582.1 | 21.14   | 18.04   | 54.89   | 21.78   | 12.14   | 11.41   |
| GAIF01023583.1 | 0       | 0       | 0       | 0       | 0.14    | 0       |
| GAIF01023584.1 | 0.33    | 0.09    | 0       | 0.1     | 0.99    | 0       |
| GAIF01023585.1 | 20.03   | 25.1    | 31.94   | 119.97  | 81.77   | 66.32   |
| GAIF01023586.1 | 1.77    | 0       | 0       | 3.71    | 7.37    | 1.89    |
| GAIF01023587.1 | 0.03    | 0       | 0       | 0       | 0       | 0       |
| GAIF01023590.1 | 9.99    | 11.22   | 8.9     | 5.99    | 4.33    | 1.44    |
| GAIF01023591.1 | 0       | 0       | 0       | 0       | 0.06    | 0       |
| GAIF01023592.1 | 0       | 0.05    | 0       | 0.44    | 3.11    | 0.06    |
| GAIF01023593.1 | 0.74    | 1.75    | 0.14    | 0.14    | 0.22    | 0       |
| GAIF01023594.1 | 12.02   | 12.89   | 24.39   | 27.15   | 19.74   | 17.27   |
| GAIF01023595.1 | 0.11    | 0.48    | 0.12    | 0.51    | 0.26    | 0.24    |
| GAIF01023596.1 | 0       | 0       | 0       | 0       | 0.28    | 0       |
| GAIF01023597.1 | 45.61   | 49.9    | 29.01   | 39.3    | 39.88   | 41.88   |
| GAIF01023598.1 | 0.11    | 0       | 0       | 0       | 0       | 0.25    |
| GAIF01023600.1 | 3.5     | 1.45    | 0.26    | 12.03   | 52.91   | 1.14    |
| GAIF01023601.1 | 42.1    | 37.74   | 44.36   | 58.75   | 34.72   | 27.29   |
| GAIF01023602.1 | 0.66    | 2.14    | 1.73    | 0.73    | 0.89    | 1.45    |
| GAIF01023604.1 | 2.47    | 1.49    | 0       | 11.91   | 40.21   | 2.12    |
| GAIF01023605.1 | 3.3     | 0       | 0       | 1.87    | 8.79    | 6.88    |
| GAIF01023608.1 | 26.29   | 38.11   | 30.84   | 70.09   | 40.5    | 16.28   |
| GAIF01023609.1 | 42.27   | 19.36   | 23.24   | 76.79   | 120.7   | 68.22   |
| GAIF01023610.1 | 70.02   | 55.58   | 49.32   | 47.12   | 6.52    | 76.15   |
| GAIF01023612.1 | 0       | 0       | 0       | 0       | 0.13    | 0       |
| GAIF01023613.1 | 0.05    | 0.05    | 0       | 0.34    | 1.06    | 0.05    |
| GAIF01023615.1 | 0.2     | 0       | 0       | 0       | 0.23    | 0       |
| GAIF01023616.1 | 10.64   | 9.76    | 10.13   | 50.08   | 45.57   | 12.73   |
| GAIF01023617.1 | 42.64   | 46.72   | 72.3    | 23.86   | 18.46   | 17.65   |
| GAIF01023618.1 | 304.85  | 140.62  | 88.35   | 362.81  | 191.66  | 184.13  |
| GAIF01023619.1 | 0.17    | 0       | 0       | 0       | 0       | 0       |
| GAIF01023620.1 | 0       | 0       | 0       | 0       | 0       | 1.96    |
| GAIF01023621.1 | 0.14    | 0       | 0       | 0.05    | 1.32    | 0.15    |
| GAIF01023622.1 | 0       | 0       | 0       | 0       | 0.22    | 0.03    |



|                |       |        |        |        |       |        |
|----------------|-------|--------|--------|--------|-------|--------|
| GAIF01023625.1 | 0.15  | 0.19   | 0.52   | 0.6    | 0.48  | 0.7    |
| GAIF01023626.1 | 0.5   | 0.67   | 0.37   | 0.97   | 1.08  | 2.28   |
| GAIF01023627.1 | 1.57  | 0.14   | 0.14   | 5.02   | 33.39 | 4.47   |
| GAIF01023628.1 | 0     | 7.68   | 4.61   | 8.33   | 16.53 | 1.81   |
| GAIF01023629.1 | 0     | 0      | 0      | 0      | 0.13  | 0      |
| GAIF01023631.1 | 0.08  | 0.18   | 0.37   | 0      | 0     | 0      |
| GAIF01023632.1 | 94.79 | 107.73 | 174.98 | 110.55 | 67.45 | 104.44 |
| GAIF01023634.1 | 4.84  | 3.83   | 2.8    | 5.56   | 16.24 | 6.45   |
| GAIF01023636.1 | 2.53  | 2.2    | 0      | 0      | 1.65  | 2.46   |
| GAIF01023637.1 | 9.24  | 11.89  | 7.86   | 33.24  | 40.02 | 4.15   |
| GAIF01023639.1 | 4.3   | 6.54   | 6.61   | 0      | 0     | 5.69   |
| GAIF01023640.1 | 1     | 0.08   | 0      | 4.89   | 20.95 | 0.55   |
| GAIF01023641.1 | 12.39 | 3.81   | 2.99   | 6.67   | 6.43  | 7.24   |
| GAIF01023642.1 | 13.68 | 13.17  | 17.04  | 39     | 29.88 | 14.95  |
| GAIF01023643.1 | 12.04 | 7.46   | 5.19   | 43.71  | 43.33 | 8.06   |
| GAIF01023645.1 | 54.25 | 57.53  | 22.27  | 41.06  | 37.21 | 5.97   |
| GAIF01023646.1 | 1.4   | 1.59   | 0.52   | 3.79   | 5.46  | 0.06   |
| GAIF01023647.1 | 40.07 | 28.54  | 14.77  | 31.49  | 50.58 | 91.61  |
| GAIF01023649.1 | 0     | 0      | 0      | 0      | 0.12  | 0      |
| GAIF01023652.1 | 5.62  | 10.2   | 2.77   | 25.95  | 30.13 | 1.39   |
| GAIF01023653.1 | 0     | 0      | 0      | 0      | 0.2   | 0      |
| GAIF01023654.1 | 22.23 | 33.71  | 28.13  | 87.24  | 53.11 | 10.3   |
| GAIF01023658.1 | 0     | 0      | 0      | 0      | 5.99  | 0      |
| GAIF01023661.1 | 0     | 0      | 0      | 0      | 0.19  | 0      |
| GAIF01023662.1 | 1.07  | 2.46   | 0      | 3.25   | 6.25  | 0.15   |
| GAIF01023663.1 | 0     | 0.13   | 0      | 0      | 0.15  | 0      |
| GAIF01023667.1 | 0.59  | 0.09   | 0.17   | 0.83   | 4.64  | 0.41   |
| GAIF01023668.1 | 0.16  | 0.12   | 0.06   | 1.49   | 7.38  | 0.18   |
| GAIF01023671.1 | 0.09  | 0      | 0      | 0.3    | 0.82  | 0      |
| GAIF01023672.1 | 0     | 0      | 0      | 5.81   | 3.45  | 0      |
| GAIF01023673.1 | 5.52  | 3.16   | 3.19   | 7.31   | 6.64  | 17.61  |
| GAIF01023674.1 | 0.47  | 1      | 1.77   | 2.65   | 1.72  | 0      |
| GAIF01023675.1 | 19.84 | 19.24  | 9.81   | 42.34  | 48.66 | 13.76  |
| GAIF01023676.1 | 0.41  | 0.15   | 0      | 0.16   | 1.81  | 0      |
| GAIF01023677.1 | 0.12  | 0      | 0      | 0.07   | 0.07  | 0      |
| GAIF01023678.1 | 0     | 0      | 0      | 0      | 1.55  | 0      |
| GAIF01023680.1 | 1.08  | 0.88   | 0.3    | 1.9    | 1.84  | 0.49   |
| GAIF01023681.1 | 0.29  | 0.53   | 1.41   | 0.1    | 0.17  | 0.18   |
| GAIF01023682.1 | 0     | 0      | 0.27   | 0.11   | 0.28  | 0.29   |
| GAIF01023683.1 | 23.85 | 8.33   | 9.45   | 12.52  | 23.59 | 9.59   |
| GAIF01023686.1 | 0.81  | 0.23   | 0      | 0.87   | 1.18  | 0      |
| GAIF01023687.1 | 51.65 | 73.8   | 132.84 | 47.8   | 23.38 | 52.86  |
| GAIF01023689.1 | 0     | 0      | 0      | 0      | 1.27  | 0      |
| GAIF01023691.1 | 1.58  | 0.92   | 1.33   | 8.16   | 3.35  | 1.47   |

|                |        |        |        |        |        |        |
|----------------|--------|--------|--------|--------|--------|--------|
| GAIF01023692.1 | 0      | 0      | 0      | 0.1    | 0.17   | 0      |
| GAIF01023693.1 | 1.49   | 1.29   | 0      | 4.11   | 15.32  | 0.9    |
| GAIF01023694.1 | 19.8   | 43.32  | 21.43  | 35.47  | 31.41  | 5.32   |
| GAIF01023695.1 | 0      | 0      | 0      | 0      | 0.89   | 0      |
| GAIF01023696.1 | 0.82   | 0.3    | 0.45   | 0      | 0      | 0      |
| GAIF01023697.1 | 80.27  | 64.17  | 78.08  | 72.02  | 108.14 | 65.13  |
| GAIF01023699.1 | 0.6    | 0.34   | 0.19   | 1.96   | 0.86   | 0.59   |
| GAIF01023700.1 | 120.72 | 112.97 | 38.03  | 174.55 | 229.27 | 29.02  |
| GAIF01023701.1 | 0.06   | 0.05   | 0      | 0.08   | 0.83   | 0      |
| GAIF01023704.1 | 0.12   | 0      | 0      | 0.36   | 2.54   | 0      |
| GAIF01023705.1 | 29.54  | 32.43  | 61.87  | 57.87  | 27.94  | 44.69  |
| GAIF01023706.1 | 0.32   | 0.08   | 0      | 0.82   | 5.64   | 0.14   |
| GAIF01023707.1 | 8.2    | 2.67   | 20.69  | 11.41  | 2.96   | 4.52   |
| GAIF01023709.1 | 0.06   | 0      | 0      | 0.16   | 0.43   | 0      |
| GAIF01023711.1 | 1.76   | 0.9    | 0.9    | 2.74   | 6.23   | 1.16   |
| GAIF01023712.1 | 68.22  | 53.29  | 70.39  | 23.26  | 6.26   | 11.32  |
| GAIF01023713.1 | 0      | 0.05   | 0      | 0.11   | 0.18   | 0      |
| GAIF01023715.1 | 22.14  | 32.39  | 33.45  | 17.64  | 14.93  | 5.34   |
| GAIF01023716.1 | 0.17   | 0      | 0      | 0      | 0      | 0      |
| GAIF01023717.1 | 15.1   | 8.64   | 16.48  | 19.51  | 7.72   | 8.81   |
| GAIF01023718.1 | 0.24   | 0      | 0      | 1.5    | 6.09   | 0.26   |
| GAIF01023719.1 | 0.09   | 0.05   | 0      | 2.58   | 0.11   | 0.59   |
| GAIF01023720.1 | 1.59   | 0.23   | 0.23   | 12.76  | 41.13  | 1.8    |
| GAIF01023721.1 | 0.32   | 0.07   | 0.04   | 1.24   | 3.65   | 0.25   |
| GAIF01023722.1 | 24.46  | 41.97  | 36.18  | 57.29  | 25.98  | 8.08   |
| GAIF01023724.1 | 0.07   | 0.07   | 0      | 0.08   | 0.32   | 0.11   |
| GAIF01023725.1 | 0.25   | 0.27   | 0      | 0.14   | 0      | 0      |
| GAIF01023726.1 | 0      | 0      | 0      | 4.08   | 4.91   | 0      |
| GAIF01023727.1 | 0.13   | 0      | 0      | 0      | 0.15   | 0      |
| GAIF01023728.1 | 0      | 0      | 0      | 0      | 0.07   | 0      |
| GAIF01023730.1 | 0      | 0      | 0      | 0.07   | 0.07   | 0      |
| GAIF01023733.1 | 0.1    | 0.11   | 0      | 0.24   | 0.62   | 0.11   |
| GAIF01023735.1 | 0      | 0.25   | 0      | 0.14   | 0.98   | 0      |
| GAIF01023736.1 | 3.59   | 0      | 0      | 0      | 3.46   | 7.13   |
| GAIF01023737.1 | 0      | 0.66   | 0      | 0.08   | 0.49   | 0      |
| GAIF01023738.1 | 0      | 0      | 2.39   | 0      | 0      | 1.54   |
| GAIF01023739.1 | 167.3  | 178.76 | 477.93 | 19.47  | 20.44  | 113.14 |
| GAIF01023740.1 | 8.74   | 0      | 22.39  | 20.29  | 7.01   | 0      |
| GAIF01023742.1 | 0      | 0.15   | 0      | 0      | 0      | 0      |
| GAIF01023743.1 | 20.41  | 6.77   | 4.7    | 1.13   | 2      | 1      |
| GAIF01023744.1 | 0.35   | 0.54   | 0.13   | 4.03   | 5.09   | 1.69   |
| GAIF01023745.1 | 0      | 0      | 0      | 0      | 0.22   | 0      |
| GAIF01023746.1 | 0.76   | 1.71   | 2.94   | 1.01   | 2.61   | 1.15   |
| GAIF01023749.1 | 0.89   | 0.41   | 0.21   | 0      | 0      | 0      |

|                |         |         |         |         |         |         |
|----------------|---------|---------|---------|---------|---------|---------|
| GAIF01023750.1 | 0.35    | 0       | 2.44    | 2.34    | 0.93    | 0.86    |
| GAIF01023752.1 | 0.29    | 0       | 0       | 1.7     | 3.87    | 0       |
| GAIF01023753.1 | 0       | 2.43    | 7.19    | 0       | 0.05    | 1.54    |
| GAIF01023754.1 | 0       | 0       | 0       | 0.96    | 2.66    | 0       |
| GAIF01023755.1 | 0.41    | 0.05    | 0.11    | 0.7     | 2.66    | 3.58    |
| GAIF01023758.1 | 0       | 0       | 0       | 0       | 0.05    | 0       |
| GAIF01023761.1 | 2.72    | 6.05    | 2.21    | 8.97    | 3.39    | 0.87    |
| GAIF01023762.1 | 0       | 0       | 0       | 0.04    | 0       | 0       |
| GAIF01023764.1 | 0       | 0       | 0       | 0.14    | 0.3     | 0       |
| GAIF01023765.1 | 0       | 0       | 0       | 0.08    | 1.31    | 0.07    |
| GAIF01023768.1 | 0.14    | 0.06    | 0.1     | 0.26    | 0.24    | 0.14    |
| GAIF01023769.1 | 1.98    | 2.31    | 1.27    | 1.68    | 2.51    | 2.05    |
| GAIF01023772.1 | 0       | 0.02    | 0.02    | 0       | 0       | 0       |
| GAIF01023774.1 | 12.67   | 20.1    | 21.75   | 29.61   | 17.85   | 3.67    |
| GAIF01023775.1 | 0.35    | 0.13    | 0.76    | 0.27    | 0       | 0.25    |
| GAIF01023777.1 | 0       | 0       | 0       | 0       | 0.16    | 0       |
| GAIF01023780.1 | 0       | 0       | 0.04    | 0.04    | 0.31    | 0       |
| GAIF01023781.1 | 0       | 0       | 0.2     | 0       | 0       | 0       |
| GAIF01023783.1 | 1.25    | 0.1     | 0       | 1.04    | 5.9     | 0       |
| GAIF01023784.1 | 0       | 0       | 0       | 0.03    | 0       | 0       |
| GAIF01023785.1 | 79.68   | 100.12  | 94.24   | 212.57  | 198.23  | 63.34   |
| GAIF01023786.1 | 0.63    | 0.41    | 0.14    | 0.73    | 2.66    | 2.09    |
| GAIF01023787.1 | 0.57    | 0.85    | 0.08    | 3.29    | 1.96    | 0.16    |
| GAIF01023788.1 | 10.27   | 0.11    | 0       | 1.84    | 11.1    | 0       |
| GAIF01023789.1 | 0.1     | 0       | 0.23    | 0.52    | 1.49    | 0.45    |
| GAIF01023790.1 | 0       | 0       | 0       | 0       | 0.34    | 0       |
| GAIF01023791.1 | 17.71   | 11.35   | 12.1    | 3.27    | 6.56    | 20.74   |
| GAIF01023792.1 | 0.1     | 0.11    | 0       | 0.23    | 1.45    | 0.11    |
| GAIF01023793.1 | 34.2    | 42.06   | 20.98   | 70.8    | 75.4    | 5.54    |
| GAIF01023795.1 | 11.85   | 21.61   | 20.85   | 17.17   | 19.81   | 8.11    |
| GAIF01023796.1 | 2.99    | 2.22    | 1.98    | 1.27    | 3.53    | 1.51    |
| GAIF01023797.1 | 2422.62 | 2338.67 | 2035.27 | 1500.29 | 1246.02 | 4790.33 |
| GAIF01023799.1 | 0       | 0       | 0       | 0       | 0.75    | 0       |
| GAIF01023800.1 | 0       | 0.42    | 0       | 0       | 0       | 0       |
| GAIF01023801.1 | 15.71   | 16.81   | 21.2    | 57.14   | 41.91   | 7.46    |
| GAIF01023802.1 | 0       | 0       | 0       | 0       | 0.09    | 0       |
| GAIF01023803.1 | 0       | 0       | 0       | 0.27    | 0.14    | 0       |
| GAIF01023804.1 | 0       | 0.14    | 0       | 0.14    | 0.23    | 0.13    |
| GAIF01023807.1 | 2.76    | 9.65    | 4.5     | 3.27    | 5.21    | 0       |
| GAIF01023809.1 | 0       | 0       | 0       | 0       | 1.02    | 0       |
| GAIF01023811.1 | 38.82   | 61.04   | 25.56   | 28.76   | 50.97   | 22.03   |
| GAIF01023812.1 | 0.25    | 0.08    | 0       | 0.76    | 1.36    | 0.6     |
| GAIF01023813.1 | 33.62   | 32.32   | 25.64   | 30.12   | 62.84   | 23.68   |
| GAIF01023814.1 | 0       | 0       | 0       | 0       | 0.36    | 0       |

|                |         |         |         |         |         |         |
|----------------|---------|---------|---------|---------|---------|---------|
| GAIF01023815.1 | 0       | 0       | 0.09    | 0       | 0       | 0       |
| GAIF01023816.1 | 0.7     | 0.38    | 0       | 3.85    | 12.29   | 1.73    |
| GAIF01023817.1 | 5.61    | 6.77    | 4.4     | 2.36    | 1.56    | 0.41    |
| GAIF01023819.1 | 0       | 0.2     | 0.1     | 0       | 0.66    | 0.1     |
| GAIF01023820.1 | 6.84    | 11.6    | 4.98    | 13.53   | 12.98   | 1.08    |
| GAIF01023821.1 | 3.72    | 0.19    | 0.22    | 45.25   | 48.39   | 0.32    |
| GAIF01023822.1 | 0.15    | 0       | 0       | 1.93    | 6.17    | 0       |
| GAIF01023823.1 | 1907.71 | 2736.87 | 3787.93 | 1211.35 | 979.46  | 712.69  |
| GAIF01023826.1 | 0       | 0       | 0       | 0       | 0.22    | 0       |
| GAIF01023829.1 | 3.35    | 6.54    | 3.27    | 10.73   | 11.26   | 2.05    |
| GAIF01023830.1 | 0.68    | 0.33    | 0.14    | 0.55    | 1.15    | 0.14    |
| GAIF01023832.1 | 1.16    | 0.46    | 0.12    | 5.12    | 21.97   | 0.58    |
| GAIF01023833.1 | 0       | 0       | 0       | 0.12    | 0.25    | 0       |
| GAIF01023837.1 | 36.96   | 47.5    | 50.77   | 134.5   | 103.36  | 15.66   |
| GAIF01023838.1 | 16.77   | 14.96   | 30.38   | 41.37   | 22.88   | 23.12   |
| GAIF01023839.1 | 1.18    | 0.41    | 0.12    | 1.61    | 3.54    | 0.64    |
| GAIF01023840.1 | 1.92    | 2.67    | 1.78    | 8.97    | 2.29    | 1.7     |
| GAIF01023841.1 | 0       | 0       | 0.09    | 0.1     | 0.3     | 0       |
| GAIF01023842.1 | 120.45  | 148.2   | 167.55  | 3.64    | 2.19    | 1.87    |
| GAIF01023843.1 | 30.75   | 17.05   | 14.77   | 23.43   | 19.7    | 16.17   |
| GAIF01023844.1 | 0.11    | 0.37    | 0.13    | 0       | 0.41    | 0       |
| GAIF01023845.1 | 0       | 0.25    | 0       | 0       | 0       | 0       |
| GAIF01023846.1 | 0       | 0       | 0       | 0       | 0.04    | 0       |
| GAIF01023848.1 | 14.02   | 13.02   | 12.25   | 32.54   | 21.91   | 6.2     |
| GAIF01023849.1 | 0.05    | 0       | 0       | 0       | 0.17    | 0       |
| GAIF01023851.1 | 123.7   | 75.73   | 26.38   | 141.35  | 150.25  | 25.33   |
| GAIF01023853.1 | 0.22    | 0.05    | 0.37    | 1.69    | 0.93    | 0.49    |
| GAIF01023854.1 | 76.35   | 21.64   | 14.75   | 8.24    | 9.43    | 4.38    |
| GAIF01023855.1 | 0       | 0.31    | 0.16    | 0.17    | 0.17    | 0       |
| GAIF01023857.1 | 11.9    | 19.81   | 19.83   | 35.01   | 21.66   | 4.45    |
| GAIF01023859.1 | 5.07    | 2.17    | 1.45    | 9.97    | 28.07   | 4.69    |
| GAIF01023861.1 | 6.44    | 5.18    | 7.16    | 6.76    | 9.17    | 10.84   |
| GAIF01023862.1 | 36.71   | 34.02   | 22.92   | 43.31   | 51.76   | 29      |
| GAIF01023863.1 | 5.89    | 6.67    | 0.54    | 18.8    | 13.57   | 0       |
| GAIF01023864.1 | 0       | 0.17    | 0       | 0.16    | 0.33    | 0.15    |
| GAIF01023865.1 | 0       | 0       | 0       | 0.16    | 0.16    | 0       |
| GAIF01023867.1 | 3.58    | 3.98    | 1.53    | 0.91    | 0.73    | 0       |
| GAIF01023868.1 | 0.04    | 0       | 0       | 0.05    | 0       | 0       |
| GAIF01023869.1 | 0       | 0       | 0.07    | 0.11    | 0.18    | 0.06    |
| GAIF01023870.1 | 38.49   | 18.12   | 10.02   | 123.69  | 179     | 32.65   |
| GAIF01023871.1 | 0.34    | 0.19    | 0.57    | 1.87    | 6.21    | 0.25    |
| GAIF01023872.1 | 0       | 0       | 0       | 0.07    | 0       | 0       |
| GAIF01023873.1 | 18.77   | 18.23   | 11.33   | 24.18   | 13.82   | 6.15    |
| GAIF01023874.1 | 4314.43 | 4447.92 | 8114.54 | 2394.74 | 1650.01 | 6122.87 |

|                |       |       |       |        |        |         |
|----------------|-------|-------|-------|--------|--------|---------|
| GAIF01023875.1 | 0     | 0     | 0.03  | 0      | 0      | 0.12    |
| GAIF01023876.1 | 0     | 0.04  | 0.11  | 0      | 0      | 0.12    |
| GAIF01023878.1 | 4.74  | 10.25 | 25.51 | 6.85   | 4.96   | 5.46    |
| GAIF01023879.1 | 2.29  | 1.52  | 0.56  | 4.73   | 4.14   | 0.84    |
| GAIF01023880.1 | 0.42  | 0.14  | 0.06  | 1.74   | 7.42   | 0.14    |
| GAIF01023881.1 | 6.92  | 3.94  | 3.18  | 5.95   | 16.24  | 6.61    |
| GAIF01023882.1 | 22.6  | 21.13 | 9.15  | 69.37  | 90.32  | 3.17    |
| GAIF01023884.1 | 1.16  | 2.43  | 0.64  | 7.29   | 16.3   | 0.27    |
| GAIF01023886.1 | 0.07  | 0     | 0     | 0.24   | 0.76   | 0       |
| GAIF01023887.1 | 12.74 | 8.07  | 2.41  | 38.29  | 87.58  | 2.51    |
| GAIF01023888.1 | 22.78 | 21.41 | 22.47 | 6.76   | 4.84   | 3.49    |
| GAIF01023890.1 | 0.15  | 0.33  | 0     | 0.27   | 0.37   | 0.08    |
| GAIF01023891.1 | 0     | 0     | 0     | 0.11   | 0      | 0       |
| GAIF01023892.1 | 0     | 0     | 0     | 0      | 2.03   | 0       |
| GAIF01023893.1 | 0.36  | 0.15  | 0.04  | 0.82   | 4.14   | 0.24    |
| GAIF01023894.1 | 0.14  | 0.24  | 0     | 0.02   | 0.28   | 0       |
| GAIF01023895.1 | 0     | 0     | 0     | 0.13   | 0.94   | 0       |
| GAIF01023896.1 | 9.69  | 9.33  | 11.4  | 2      | 0.5    | 0.34    |
| GAIF01023898.1 | 0     | 0     | 0     | 107.37 | 662.81 | 3407.15 |
| GAIF01023900.1 | 0.54  | 0     | 0     | 0.2    | 0.51   | 0.24    |
| GAIF01023902.1 | 0     | 0     | 0     | 0.4    | 0.96   | 0       |
| GAIF01023903.1 | 0.26  | 0.14  | 0.43  | 0.15   | 0.32   | 0       |
| GAIF01023905.1 | 0.16  | 0     | 0.17  | 0.18   | 0      | 0       |
| GAIF01023906.1 | 0.78  | 0.73  | 0.47  | 2.19   | 8.96   | 0.45    |
| GAIF01023907.1 | 3.2   | 8.09  | 4.19  | 5.63   | 6.4    | 0.31    |
| GAIF01023908.1 | 4.31  | 7.02  | 3.18  | 7.93   | 11.16  | 6.63    |
| GAIF01023909.1 | 0.24  | 0.09  | 0.18  | 2.31   | 6.04   | 0       |
| GAIF01023910.1 | 10.14 | 10.12 | 2.75  | 32.02  | 44.24  | 3.31    |
| GAIF01023911.1 | 0.34  | 0     | 0     | 1.48   | 4.83   | 0.21    |
| GAIF01023912.1 | 0     | 0     | 0     | 0.04   | 0.12   | 0.04    |
| GAIF01023913.1 | 9.28  | 6.87  | 8.67  | 37.14  | 10.69  | 11.32   |
| GAIF01023915.1 | 10.15 | 2.18  | 0.8   | 23.19  | 41.83  | 3.2     |
| GAIF01023916.1 | 1.02  | 1.21  | 0     | 3.08   | 7.06   | 0.26    |
| GAIF01023917.1 | 1.62  | 1.09  | 4.87  | 0.9    | 6.81   | 2.61    |
| GAIF01023918.1 | 1.39  | 0.39  | 0.06  | 0      | 0.37   | 0.17    |
| GAIF01023919.1 | 3.04  | 0     | 0     | 5.9    | 10.38  | 0.76    |
| GAIF01023921.1 | 0     | 0     | 0     | 0      | 0.35   | 0       |
| GAIF01023922.1 | 0.17  | 0.22  | 0.16  | 1.91   | 3.82   | 0.19    |
| GAIF01023924.1 | 14.21 | 17.58 | 14.58 | 24.26  | 18.07  | 4.38    |
| GAIF01023926.1 | 24.63 | 16.22 | 2.3   | 55.4   | 48.14  | 0.71    |
| GAIF01023927.1 | 12.58 | 4.37  | 90.56 | 5.48   | 4.06   | 1.63    |
| GAIF01023928.1 | 0     | 7.19  | 7.72  | 0      | 0      | 3.3     |
| GAIF01023929.1 | 21.08 | 22.64 | 13.29 | 29.46  | 36.41  | 32.11   |
| GAIF01023930.1 | 2.38  | 0.51  | 0.53  | 10.08  | 36.33  | 2.53    |

|                |         |         |         |         |         |          |
|----------------|---------|---------|---------|---------|---------|----------|
| GAIF01023931.1 | 2.11    | 0.35    | 0.24    | 6.96    | 20.9    | 10.01    |
| GAIF01023934.1 | 5.19    | 3.32    | 0       | 1.77    | 2.43    | 1.42     |
| GAIF01023937.1 | 0.33    | 0       | 0       | 0.11    | 0.61    | 0        |
| GAIF01023938.1 | 0       | 0       | 0       | 0.05    | 0.26    | 0        |
| GAIF01023940.1 | 79.76   | 92.22   | 134.74  | 42.37   | 27.36   | 24.14    |
| GAIF01023941.1 | 14.33   | 3.29    | 31.45   | 35.8    | 9.15    | 0        |
| GAIF01023942.1 | 0       | 0       | 0       | 0.18    | 0.18    | 0        |
| GAIF01023943.1 | 0.77    | 0.37    | 0       | 5.07    | 21.93   | 4.72     |
| GAIF01023944.1 | 0.43    | 1.32    | 0.19    | 0.9     | 3.74    | 0        |
| GAIF01023945.1 | 0.18    | 0.15    | 0.2     | 0.16    | 0.28    | 0.15     |
| GAIF01023948.1 | 0       | 0       | 0       | 0       | 0.12    | 0        |
| GAIF01023949.1 | 8762.99 | 4952.69 | 7657.25 | 4958.43 | 3248.19 | 10611.82 |
| GAIF01023950.1 | 0       | 0       | 0       | 0       | 0.41    | 0        |
| GAIF01023951.1 | 134.03  | 36.02   | 34.85   | 82.06   | 67.66   | 131.53   |
| GAIF01023952.1 | 0.6     | 0       | 0.19    | 0.89    | 5.53    | 3.94     |
| GAIF01023954.1 | 65.39   | 21.81   | 5.35    | 24.54   | 43.29   | 52.18    |
| GAIF01023956.1 | 0       | 4.45    | 2.28    | 5.42    | 0.61    | 0        |
| GAIF01023957.1 | 29.53   | 43.25   | 20.69   | 103.64  | 59.99   | 9.23     |
| GAIF01023958.1 | 2.79    | 0.96    | 1.13    | 0.34    | 0.18    | 0        |
| GAIF01023959.1 | 0       | 0       | 0       | 0       | 0.06    | 0        |
| GAIF01023960.1 | 0.14    | 0.05    | 0       | 0.04    | 0.2     | 0.13     |
| GAIF01023961.1 | 0       | 0       | 0       | 0.09    | 0.29    | 0        |
| GAIF01023962.1 | 0       | 0       | 0       | 0       | 0       | 0.12     |
| GAIF01023965.1 | 0       | 0.06    | 0       | 0.07    | 0.41    | 0        |
| GAIF01023966.1 | 0.94    | 1.03    | 0.52    | 4.11    | 10.64   | 2.34     |
| GAIF01023967.1 | 0       | 0.19    | 0.1     | 0.03    | 0.22    | 0.31     |
| GAIF01023968.1 | 0       | 0       | 0.03    | 0       | 0.01    | 0        |
| GAIF01023969.1 | 0.43    | 0.08    | 0.08    | 0.76    | 2.27    | 0.23     |
| GAIF01023970.1 | 0       | 0.19    | 0.03    | 0       | 0.04    | 0.45     |
| GAIF01023973.1 | 4.86    | 0.32    | 0.02    | 7.41    | 15.83   | 0        |
| GAIF01023974.1 | 0.14    | 0       | 0.31    | 1.13    | 1.26    | 0.16     |
| GAIF01023975.1 | 9.23    | 7.49    | 12.01   | 25.24   | 27.67   | 23.91    |
| GAIF01023976.1 | 1.51    | 0.13    | 0       | 1.61    | 4.79    | 16.35    |
| GAIF01023978.1 | 6.1     | 7.87    | 18.7    | 32.62   | 14.34   | 15.96    |
| GAIF01023979.1 | 0       | 0       | 0       | 0.22    | 0       | 0        |
| GAIF01023980.1 | 0.09    | 0       | 0       | 0       | 0.54    | 0.1      |
| GAIF01023981.1 | 0.13    | 0       | 0       | 0       | 0       | 0.85     |
| GAIF01023982.1 | 11.58   | 7.45    | 15.24   | 0.98    | 2.61    | 0        |
| GAIF01023984.1 | 0       | 0       | 0       | 0.06    | 0.32    | 0        |
| GAIF01023985.1 | 5.81    | 3.77    | 0.98    | 35.78   | 65.96   | 4.31     |
| GAIF01023987.1 | 6       | 3.97    | 2.23    | 15.14   | 7.28    | 14.92    |
| GAIF01023988.1 | 83.91   | 13.14   | 3.32    | 24.2    | 69.41   | 105.54   |
| GAIF01023991.1 | 0.25    | 0       | 0.07    | 0.14    | 0.79    | 0.2      |
| GAIF01023993.1 | 0.08    | 0       | 0.09    | 0       | 1.92    | 0        |

|                |         |       |        |        |       |         |
|----------------|---------|-------|--------|--------|-------|---------|
| GAIF01023994.1 | 14.87   | 24.25 | 33.82  | 63.61  | 32.57 | 20.08   |
| GAIF01023995.1 | 0.28    | 0.26  | 0.18   | 0      | 0.15  | 0.04    |
| GAIF01023996.1 | 0.93    | 0.69  | 0.29   | 0.47   | 0.3   | 0.1     |
| GAIF01023997.1 | 22.71   | 33.6  | 21.05  | 40.72  | 33.69 | 8.1     |
| GAIF01024000.1 | 0.05    | 0.15  | 0.06   | 0.16   | 0.13  | 0       |
| GAIF01024004.1 | 19.39   | 11.52 | 12.16  | 26.81  | 52.13 | 42.65   |
| GAIF01024005.1 | 0       | 0     | 0.07   | 0.51   | 1.57  | 0.07    |
| GAIF01024006.1 | 0.2     | 0.22  | 0.37   | 0.16   | 0.08  | 0.08    |
| GAIF01024007.1 | 0       | 0.59  | 0      | 0      | 0     | 0.17    |
| GAIF01024008.1 | 0       | 0     | 0      | 0      | 0.39  | 0.36    |
| GAIF01024009.1 | 0.04    | 0     | 0      | 0.05   | 0     | 0       |
| GAIF01024011.1 | 0       | 0     | 0      | 0.1    | 0     | 0       |
| GAIF01024013.1 | 16.26   | 8.15  | 5.15   | 50.62  | 68.74 | 7.34    |
| GAIF01024014.1 | 16.4    | 19.46 | 18.67  | 26.6   | 39.97 | 6.38    |
| GAIF01024016.1 | 0.05    | 0.31  | 0.15   | 0.09   | 0.08  | 0       |
| GAIF01024018.1 | 0       | 0     | 0      | 0.41   | 2.99  | 0       |
| GAIF01024020.1 | 58.01   | 60.58 | 56.69  | 106.95 | 43.72 | 14.42   |
| GAIF01024021.1 | 0       | 0.12  | 0      | 0.13   | 0.67  | 0       |
| GAIF01024022.1 | 37.08   | 26.14 | 23.13  | 44.2   | 58.47 | 25.34   |
| GAIF01024024.1 | 0.14    | 0     | 0      | 0      | 0.98  | 0       |
| GAIF01024025.1 | 4.36    | 8.72  | 0.99   | 2.19   | 1.18  | 0       |
| GAIF01024026.1 | 0       | 0.15  | 0      | 0.16   | 0.34  | 0       |
| GAIF01024027.1 | 0.66    | 0     | 0      | 0.54   | 0     | 0       |
| GAIF01024028.1 | 0.3     | 0     | 0      | 0.62   | 1.08  | 0.26    |
| GAIF01024029.1 | 0       | 0     | 0      | 0.12   | 0.43  | 0       |
| GAIF01024030.1 | 13.04   | 22.63 | 11.84  | 39     | 21.81 | 3.96    |
| GAIF01024031.1 | 0       | 0     | 0      | 0      | 0.25  | 0       |
| GAIF01024032.1 | 9.19    | 18.92 | 4.15   | 40.77  | 73.04 | 0.18    |
| GAIF01024033.1 | 0.42    | 0.64  | 0.53   | 0.32   | 1.13  | 1.3     |
| GAIF01024034.1 | 0.06    | 0     | 0      | 0      | 1.2   | 0       |
| GAIF01024036.1 | 1009.05 | 205.1 | 278.44 | 609.8  | 993.3 | 3689.51 |
| GAIF01024037.1 | 0.77    | 0.15  | 0      | 0.21   | 1.34  | 0       |
| GAIF01024038.1 | 0       | 0     | 0      | 0.53   | 3.89  | 0       |
| GAIF01024040.1 | 0.66    | 0.7   | 0      | 0.71   | 0.71  | 0       |
| GAIF01024041.1 | 0.23    | 0.13  | 0      | 0.33   | 2.7   | 0.19    |
| GAIF01024042.1 | 20.62   | 15.57 | 10.09  | 88.78  | 83.53 | 7.94    |
| GAIF01024045.1 | 69.99   | 54.38 | 83.32  | 14.12  | 29.81 | 18.4    |
| GAIF01024046.1 | 0       | 0     | 0.36   | 0      | 0     | 0.72    |
| GAIF01024048.1 | 0       | 0     | 0      | 0.03   | 0     | 0       |
| GAIF01024049.1 | 1.13    | 0.32  | 0.02   | 3.32   | 9.58  | 0.07    |
| GAIF01024053.1 | 0.09    | 0     | 0.1    | 1.18   | 2.14  | 0.51    |
| GAIF01024055.1 | 151.26  | 76.41 | 31.92  | 78.96  | 33.62 | 5.69    |
| GAIF01024056.1 | 3.34    | 2.5   | 1.15   | 4.69   | 1.34  | 0.54    |
| GAIF01024057.1 | 0       | 0.21  | 0.09   | 0.77   | 1.18  | 0.26    |

|                |        |         |         |        |        |        |
|----------------|--------|---------|---------|--------|--------|--------|
| GAIF01024059.1 | 4.58   | 10.48   | 8.83    | 4.47   | 4.02   | 1.63   |
| GAIF01024060.1 | 0.41   | 0       | 0       | 0.24   | 0.25   | 0      |
| GAIF01024061.1 | 41.92  | 33.71   | 47.09   | 24.93  | 22.3   | 46.5   |
| GAIF01024062.1 | 0.26   | 0       | 0       | 0.11   | 1.61   | 0      |
| GAIF01024063.1 | 0      | 0       | 0       | 0      | 0      | 0.21   |
| GAIF01024064.1 | 0      | 0       | 0       | 0      | 0.13   | 0      |
| GAIF01024065.1 | 0      | 0       | 0       | 0      | 0.08   | 0      |
| GAIF01024066.1 | 6.45   | 6.66    | 4.3     | 6.18   | 3.38   | 3.46   |
| GAIF01024068.1 | 0.47   | 0       | 0       | 0      | 0.14   | 0      |
| GAIF01024071.1 | 106.81 | 147.31  | 59.39   | 27.16  | 22.36  | 0      |
| GAIF01024075.1 | 0      | 0       | 0       | 0      | 0.08   | 0      |
| GAIF01024076.1 | 0      | 0       | 0       | 0.61   | 1.38   | 0      |
| GAIF01024077.1 | 4.38   | 1.12    | 0.14    | 3.06   | 2.63   | 0.21   |
| GAIF01024078.1 | 20.05  | 16.38   | 11.84   | 17.82  | 28.23  | 9.74   |
| GAIF01024079.1 | 3.04   | 3.63    | 3.83    | 8.1    | 5.48   | 0.84   |
| GAIF01024080.1 | 0.4    | 0       | 0       | 2      | 6.38   | 0.29   |
| GAIF01024082.1 | 0      | 0       | 0       | 0.16   | 0.33   | 0      |
| GAIF01024083.1 | 18.9   | 29.97   | 20.5    | 86.36  | 47.08  | 9.19   |
| GAIF01024084.1 | 1      | 0.16    | 0.19    | 3.18   | 10.66  | 0.19   |
| GAIF01024085.1 | 0.55   | 0.75    | 0.15    | 10.21  | 19.9   | 0.23   |
| GAIF01024086.1 | 0      | 0.71    | 0.48    | 0      | 0      | 0.08   |
| GAIF01024087.1 | 622.04 | 4348.58 | 1806.86 | 92.15  | 459.9  | 371.45 |
| GAIF01024088.1 | 0.46   | 0.18    | 0.44    | 1.91   | 6.03   | 0.88   |
| GAIF01024090.1 | 0.07   | 0       | 0.06    | 0.44   | 0.54   | 0      |
| GAIF01024092.1 | 0      | 0.27    | 0.27    | 0.58   | 0      | 0.14   |
| GAIF01024093.1 | 402.03 | 139.55  | 46.95   | 138.01 | 284.03 | 13.07  |
| GAIF01024094.1 | 5.34   | 10.24   | 4.59    | 8.14   | 6.72   | 0.62   |
| GAIF01024095.1 | 0.62   | 0.13    | 0       | 9.12   | 22.18  | 0      |
| GAIF01024096.1 | 4.95   | 2.51    | 4.31    | 2.48   | 7.29   | 15.24  |
| GAIF01024097.1 | 0.47   | 0       | 0       | 1.5    | 10.74  | 0.52   |
| GAIF01024099.1 | 0      | 0       | 0       | 0.03   | 0      | 0      |
| GAIF01024100.1 | 0.06   | 0       | 0.18    | 0.18   | 0.01   | 0.03   |
| GAIF01024101.1 | 3.39   | 1.9     | 0.89    | 2.46   | 5.45   | 0.28   |
| GAIF01024102.1 | 101.6  | 69.15   | 25.18   | 110.28 | 231.07 | 107.96 |
| GAIF01024103.1 | 4.1    | 0       | 0.18    | 3.62   | 9.67   | 0.72   |
| GAIF01024104.1 | 0      | 0       | 0       | 0      | 0      | 0.19   |
| GAIF01024105.1 | 0.16   | 0       | 0       | 0.14   | 0.13   | 0.06   |
| GAIF01024110.1 | 0.21   | 0.07    | 0       | 0.95   | 2.47   | 0.38   |
| GAIF01024113.1 | 5.14   | 8.94    | 0.9     | 15.38  | 21     | 0.23   |
| GAIF01024114.1 | 0      | 0       | 0       | 0.23   | 0      | 0.44   |
| GAIF01024115.1 | 11.53  | 5.92    | 3.9     | 14.84  | 13.93  | 1.9    |
| GAIF01024116.1 | 3.63   | 4.89    | 2.24    | 6.73   | 6.31   | 0.39   |
| GAIF01024118.1 | 6.64   | 7.22    | 6.24    | 13.59  | 6.83   | 1.16   |
| GAIF01024119.1 | 0      | 0       | 0       | 0.03   | 0.2    | 0.03   |



|                |        |        |        |        |        |        |
|----------------|--------|--------|--------|--------|--------|--------|
| GAIF01024120.1 | 1.41   | 0.77   | 0      | 9.89   | 25.25  | 0      |
| GAIF01024121.1 | 5.89   | 2.57   | 6.06   | 12.28  | 12.27  | 20.14  |
| GAIF01024122.1 | 0.27   | 0.19   | 0.1    | 0.42   | 0.32   | 0      |
| GAIF01024123.1 | 4.22   | 3.36   | 3.17   | 11     | 6.47   | 2.65   |
| GAIF01024124.1 | 12.57  | 13.31  | 8.21   | 8.72   | 2.03   | 0      |
| GAIF01024125.1 | 8.46   | 15.12  | 12.22  | 5.11   | 3.35   | 2.94   |
| GAIF01024126.1 | 5.52   | 1.25   | 1.72   | 4.59   | 10.9   | 9.3    |
| GAIF01024127.1 | 0      | 0      | 0      | 0.2    | 0      | 0      |
| GAIF01024129.1 | 0.68   | 0      | 0.15   | 0.32   | 0.16   | 0      |
| GAIF01024130.1 | 8.87   | 13.14  | 5.26   | 1.58   | 1.03   | 0.39   |
| GAIF01024131.1 | 0.58   | 0      | 0      | 0      | 0      | 0      |
| GAIF01024132.1 | 6.18   | 1.17   | 0      | 7.67   | 17.16  | 1.54   |
| GAIF01024133.1 | 2.24   | 1.12   | 3.06   | 1.07   | 0.35   | 1.25   |
| GAIF01024134.1 | 7.48   | 11.17  | 7.23   | 18.31  | 17.84  | 1.89   |
| GAIF01024136.1 | 1.37   | 2      | 1.38   | 5.14   | 6.65   | 0.36   |
| GAIF01024137.1 | 0.46   | 0      | 0      | 0.53   | 2.94   | 0.14   |
| GAIF01024139.1 | 108.59 | 185.64 | 295.81 | 202.72 | 125    | 114.95 |
| GAIF01024140.1 | 78.89  | 40.3   | 32.91  | 88.82  | 115.2  | 122.68 |
| GAIF01024143.1 | 18.15  | 8.35   | 17.25  | 7.09   | 2.31   | 7.69   |
| GAIF01024144.1 | 0.02   | 0.26   | 0      | 0.34   | 3.26   | 0.21   |
| GAIF01024145.1 | 18.4   | 17.06  | 12.31  | 12.02  | 6.32   | 6.3    |
| GAIF01024146.1 | 13.35  | 26.82  | 12.7   | 33.79  | 22.48  | 2.24   |
| GAIF01024148.1 | 0      | 0      | 0      | 0.19   | 0.41   | 0      |
| GAIF01024149.1 | 0.08   | 0.08   | 0.08   | 0.04   | 1.14   | 0.04   |
| GAIF01024150.1 | 9.01   | 8.85   | 14.28  | 21.4   | 9.04   | 9.75   |
| GAIF01024152.1 | 0      | 0.04   | 0.08   | 0      | 0      | 0      |
| GAIF01024154.1 | 8.15   | 12.56  | 6.29   | 27.7   | 14.7   | 6.74   |
| GAIF01024155.1 | 2.7    | 1.32   | 0.88   | 4.19   | 0.64   | 1.94   |
| GAIF01024156.1 | 44.96  | 43.45  | 19.19  | 98.55  | 102.12 | 30.28  |
| GAIF01024157.1 | 0.37   | 0.04   | 0      | 0.14   | 0.42   | 0      |
| GAIF01024158.1 | 0.2    | 0.36   | 0      | 0.14   | 0.4    | 0.18   |
| GAIF01024159.1 | 0.3    | 0      | 0.28   | 0.1    | 0      | 0.05   |
| GAIF01024160.1 | 2.77   | 2.9    | 1.64   | 2.35   | 4.49   | 0.82   |
| GAIF01024162.1 | 4.05   | 1.44   | 1.5    | 2.36   | 3.37   | 0.35   |
| GAIF01024163.1 | 0      | 0      | 0      | 0.59   | 2.34   | 0      |
| GAIF01024165.1 | 2.89   | 1.33   | 0.72   | 0.33   | 0.75   | 0.08   |
| GAIF01024167.1 | 0      | 0.49   | 0.49   | 0      | 0      | 0.07   |
| GAIF01024168.1 | 1.3    | 0      | 0.2    | 0.43   | 0      | 0      |
| GAIF01024170.1 | 3.03   | 1.78   | 1.83   | 0.99   | 1.2    | 0.53   |
| GAIF01024171.1 | 4.06   | 0      | 1.05   | 13.93  | 34.72  | 0      |
| GAIF01024172.1 | 484.76 | 549.95 | 256.94 | 531.82 | 344.05 | 330.62 |
| GAIF01024173.1 | 0      | 0      | 0      | 0.04   | 0      | 0      |
| GAIF01024175.1 | 0.06   | 0.02   | 0      | 0      | 0.06   | 0      |
| GAIF01024177.1 | 12.89  | 12.75  | 8.32   | 7.1    | 4.89   | 1.14   |

|                |         |         |         |         |         |         |
|----------------|---------|---------|---------|---------|---------|---------|
| GAIF01024179.1 | 0.22    | 0.15    | 0.06    | 0.64    | 1.72    | 0       |
| GAIF01024181.1 | 88.89   | 157.2   | 68.67   | 215.54  | 171.47  | 9.12    |
| GAIF01024183.1 | 101.97  | 170.11  | 203.41  | 93.35   | 80.23   | 96.18   |
| GAIF01024184.1 | 0       | 0       | 0.32    | 0       | 0.35    | 0       |
| GAIF01024185.1 | 4.15    | 3.57    | 1.19    | 6.58    | 12.98   | 1.51    |
| GAIF01024186.1 | 8.31    | 4.63    | 2.34    | 4.58    | 3.81    | 0.29    |
| GAIF01024188.1 | 0.12    | 0.06    | 0.32    | 0.58    | 0.99    | 0.13    |
| GAIF01024192.1 | 0       | 0.13    | 0       | 0       | 8.7     | 0       |
| GAIF01024193.1 | 0.17    | 0.14    | 0       | 0.29    | 0.4     | 0       |
| GAIF01024194.1 | 0       | 0       | 0       | 0.07    | 0       | 0       |
| GAIF01024195.1 | 0       | 4.78    | 2.07    | 0       | 0.25    | 0.63    |
| GAIF01024196.1 | 9.95    | 12.39   | 4.22    | 72.47   | 83.52   | 2.09    |
| GAIF01024197.1 | 3208.92 | 3825.81 | 5792.21 | 2448.77 | 1658.83 | 3877.09 |
| GAIF01024198.1 | 21.58   | 29.38   | 31.93   | 51.96   | 23.24   | 13.94   |
| GAIF01024199.1 | 2.11    | 0.11    | 0.12    | 3.34    | 10.77   | 1.7     |
| GAIF01024200.1 | 3.58    | 5.55    | 4.07    | 5.36    | 4.6     | 0.27    |
| GAIF01024202.1 | 0       | 0       | 0       | 0.27    | 2.91    | 0       |
| GAIF01024203.1 | 0.13    | 0.09    | 0       | 0.39    | 0       | 0       |
| GAIF01024204.1 | 0.12    | 0.19    | 0       | 0.07    | 0.42    | 0       |
| GAIF01024205.1 | 1.4     | 0.97    | 0.14    | 7.26    | 6.76    | 3.17    |
| GAIF01024206.1 | 0       | 0       | 0.09    | 0       | 0       | 0       |
| GAIF01024207.1 | 0       | 0       | 0       | 0       | 0.66    | 0       |
| GAIF01024208.1 | 25.26   | 6.22    | 3.68    | 0       | 0       | 0       |
| GAIF01024209.1 | 0.26    | 0.28    | 0       | 0.45    | 0.15    | 0       |
| GAIF01024210.1 | 6.25    | 7.37    | 0.88    | 31.78   | 91.61   | 2.29    |
| GAIF01024211.1 | 1.17    | 0.4     | 0.09    | 0.86    | 0.38    | 1.3     |
| GAIF01024213.1 | 0       | 0       | 0       | 0       | 0.22    | 0       |
| GAIF01024214.1 | 0.32    | 1.05    | 0       | 0       | 0       | 0       |
| GAIF01024215.1 | 0       | 0       | 0       | 0.02    | 0.02    | 0       |
| GAIF01024216.1 | 4.27    | 2.17    | 3.09    | 4.11    | 9.07    | 4.5     |
| GAIF01024220.1 | 4.55    | 1.6     | 2.74    | 4.26    | 4.23    | 1.62    |
| GAIF01024221.1 | 0       | 0       | 0       | 0       | 0.12    | 0       |
| GAIF01024223.1 | 99.12   | 88.66   | 28.07   | 10.51   | 6.18    | 31.76   |
| GAIF01024226.1 | 2.3     | 1.82    | 1.55    | 3.94    | 1.95    | 4.44    |
| GAIF01024227.1 | 1.71    | 0       | 0       | 1.17    | 1.52    | 0.42    |
| GAIF01024228.1 | 3.2     | 0.16    | 0.26    | 7.15    | 21.7    | 8.05    |
| GAIF01024230.1 | 0       | 0       | 0       | 0.4     | 0       | 0       |
| GAIF01024233.1 | 0.09    | 0       | 0       | 0.05    | 0       | 0.05    |
| GAIF01024235.1 | 7.98    | 9.37    | 2.1     | 12.82   | 14.58   | 3.96    |
| GAIF01024236.1 | 3.26    | 4.54    | 4.74    | 6.79    | 3.52    | 2.11    |
| GAIF01024237.1 | 0       | 0       | 0       | 0       | 38.72   | 0       |
| GAIF01024238.1 | 0       | 0       | 0       | 0       | 0.29    | 0       |
| GAIF01024239.1 | 0.04    | 0.02    | 0.2     | 0.08    | 0.37    | 0.03    |
| GAIF01024241.1 | 0.02    | 0       | 0       | 0.03    | 0.02    | 0       |

|                |        |       |       |       |        |        |
|----------------|--------|-------|-------|-------|--------|--------|
| GAIF01024242.1 | 1.61   | 0.53  | 0     | 4.88  | 6.32   | 0      |
| GAIF01024243.1 | 0      | 0.48  | 0     | 0     | 2.34   | 0.07   |
| GAIF01024244.1 | 13.42  | 6.9   | 12.51 | 25.15 | 18.13  | 1.61   |
| GAIF01024245.1 | 0      | 0     | 0     | 0     | 0.09   | 0      |
| GAIF01024246.1 | 7.5    | 13.22 | 10.68 | 24.7  | 16.33  | 2.9    |
| GAIF01024247.1 | 0.16   | 0.26  | 0     | 0.03  | 0.03   | 0.31   |
| GAIF01024248.1 | 2.6    | 3.83  | 2.04  | 0.79  | 0.3    | 0.2    |
| GAIF01024249.1 | 5.27   | 5.18  | 4.36  | 10.14 | 10.16  | 2.31   |
| GAIF01024250.1 | 0.03   | 0     | 0     | 0.06  | 0.33   | 0      |
| GAIF01024251.1 | 95.05  | 72.31 | 110   | 107.9 | 68.53  | 48.22  |
| GAIF01024252.1 | 0      | 0     | 0     | 0.24  | 0      | 0      |
| GAIF01024253.1 | 8.53   | 12    | 7.22  | 23.41 | 14.06  | 3.24   |
| GAIF01024254.1 | 0      | 0.11  | 0.34  | 0.22  | 0.18   | 0.23   |
| GAIF01024255.1 | 8.35   | 4.95  | 4.75  | 11.02 | 25.95  | 30.5   |
| GAIF01024256.1 | 0.06   | 0.06  | 0     | 0.49  | 0.61   | 0.06   |
| GAIF01024258.1 | 0.43   | 0     | 0     | 0.99  | 6.66   | 0      |
| GAIF01024259.1 | 0.22   | 0     | 0     | 0     | 0      | 0.05   |
| GAIF01024260.1 | 0.3    | 0     | 0     | 0.82  | 0.85   | 0.07   |
| GAIF01024261.1 | 8.64   | 2.84  | 1.3   | 34.21 | 54.29  | 22.82  |
| GAIF01024262.1 | 2.67   | 0.09  | 0     | 1.13  | 7.18   | 0.64   |
| GAIF01024263.1 | 0      | 0     | 0     | 0     | 0.19   | 0      |
| GAIF01024266.1 | 11.45  | 18.3  | 17    | 1.72  | 1.78   | 0.89   |
| GAIF01024267.1 | 0      | 0     | 0     | 0     | 0.25   | 0      |
| GAIF01024269.1 | 0      | 0.8   | 0.36  | 3.07  | 13.69  | 1.12   |
| GAIF01024270.1 | 505.64 | 34.28 | 23.25 | 331.7 | 315.89 | 445.42 |
| GAIF01024271.1 | 24.82  | 36.49 | 20.55 | 4.9   | 15.48  | 4.63   |
| GAIF01024272.1 | 11.01  | 8.05  | 17.34 | 16.81 | 9.5    | 61.81  |
| GAIF01024273.1 | 1.35   | 1.38  | 1.57  | 2.58  | 3.62   | 0.17   |
| GAIF01024274.1 | 0      | 0     | 0     | 0.18  | 0.09   | 0.04   |
| GAIF01024275.1 | 0.37   | 0.21  | 0.77  | 0.22  | 0.2    | 0      |
| GAIF01024277.1 | 4.73   | 7.09  | 3.91  | 3.05  | 2.48   | 0.36   |
| GAIF01024279.1 | 6.47   | 5.21  | 6.45  | 9.32  | 10.67  | 2.25   |
| GAIF01024280.1 | 0      | 2.03  | 0     | 0     | 0      | 0.22   |
| GAIF01024281.1 | 0.05   | 0     | 0     | 0.25  | 0.97   | 0.17   |
| GAIF01024282.1 | 0      | 0     | 0     | 0.63  | 0.49   | 0.07   |
| GAIF01024284.1 | 28.17  | 11.22 | 3.71  | 4.2   | 3.12   | 0.25   |
| GAIF01024285.1 | 7.34   | 1.67  | 1.06  | 40.8  | 85.62  | 1.78   |
| GAIF01024286.1 | 0      | 0     | 0     | 0.24  | 0.61   | 0.11   |
| GAIF01024287.1 | 0      | 0.15  | 0.31  | 0     | 0      | 0      |
| GAIF01024288.1 | 18.88  | 36.72 | 7.11  | 46.39 | 56.53  | 0.61   |
| GAIF01024290.1 | 28.34  | 28.32 | 22.08 | 27.34 | 24.58  | 10.69  |
| GAIF01024291.1 | 0      | 0     | 0     | 0     | 0.08   | 0      |
| GAIF01024297.1 | 0      | 0     | 0     | 0.03  | 0.1    | 0      |
| GAIF01024298.1 | 0.07   | 0     | 0     | 0     | 0      | 0      |

|                |       |       |       |        |        |       |
|----------------|-------|-------|-------|--------|--------|-------|
| GAIF01024299.1 | 45.78 | 31.73 | 19.12 | 168.31 | 149.71 | 26.94 |
| GAIF01024300.1 | 0     | 0     | 0     | 0.13   | 0.2    | 0     |
| GAIF01024301.1 | 0.38  | 0     | 0     | 0.15   | 0.3    | 0     |
| GAIF01024302.1 | 0     | 0     | 0     | 0      | 0.28   | 0     |
| GAIF01024303.1 | 1.04  | 0.66  | 0.54  | 4.61   | 9.55   | 0.34  |
| GAIF01024304.1 | 14.61 | 6.71  | 15.21 | 1.13   | 0      | 0.6   |
| GAIF01024305.1 | 54.75 | 52.95 | 39.84 | 32.03  | 31.52  | 24.58 |
| GAIF01024306.1 | 1     | 0.39  | 0     | 0.39   | 1.76   | 0     |
| GAIF01024308.1 | 0.07  | 0     | 0.64  | 0.08   | 0      | 0.08  |
| GAIF01024309.1 | 0     | 0     | 0     | 0      | 0.17   | 0     |
| GAIF01024310.1 | 1.15  | 2.37  | 0.53  | 0.63   | 0      | 0     |
| GAIF01024311.1 | 0.73  | 0.62  | 0.36  | 1.22   | 2.54   | 0.36  |
| GAIF01024312.1 | 13.74 | 20.9  | 16.11 | 3.4    | 4.19   | 1.79  |
| GAIF01024313.1 | 0     | 0     | 0.09  | 0      | 0      | 0.09  |
| GAIF01024315.1 | 3.5   | 4.1   | 2.61  | 18.26  | 19.79  | 2.62  |
| GAIF01024316.1 | 0     | 2.08  | 0     | 0      | 0      | 0     |
| GAIF01024317.1 | 0     | 0     | 0     | 0.15   | 1.24   | 0     |
| GAIF01024318.1 | 37.77 | 9.26  | 4.87  | 27.81  | 66.53  | 12.4  |
| GAIF01024319.1 | 2.17  | 0.37  | 0     | 3.18   | 8.1    | 0.38  |
| GAIF01024320.1 | 3.59  | 2.52  | 1.21  | 5.68   | 6.2    | 0.41  |
| GAIF01024321.1 | 1.18  | 2.19  | 0.39  | 6.59   | 11.52  | 1.3   |
| GAIF01024322.1 | 0.91  | 0.11  | 0.63  | 0.12   | 3.51   | 1     |
| GAIF01024323.1 | 0     | 0.03  | 0     | 0      | 0      | 0     |
| GAIF01024325.1 | 0.13  | 0.03  | 0.57  | 0      | 1.42   | 0.28  |
| GAIF01024326.1 | 6.4   | 11.76 | 2.78  | 22.19  | 18.98  | 1.37  |
| GAIF01024327.1 | 4.36  | 2.79  | 4.2   | 11.04  | 8.61   | 7.36  |
| GAIF01024329.1 | 0     | 0     | 0     | 0      | 3.77   | 0.18  |
| GAIF01024330.1 | 1.92  | 1.79  | 0.75  | 9.39   | 16.49  | 0.45  |
| GAIF01024333.1 | 0     | 3.35  | 2.09  | 0.19   | 0.37   | 0.98  |
| GAIF01024334.1 | 0.12  | 0.08  | 0     | 0.15   | 0.75   | 0.16  |
| GAIF01024335.1 | 15.41 | 16.72 | 4.26  | 9.16   | 20.12  | 10.29 |
| GAIF01024336.1 | 0.12  | 0     | 0     | 0      | 0      | 0     |
| GAIF01024338.1 | 2.31  | 1.82  | 1.02  | 18.85  | 22.78  | 0.4   |
| GAIF01024339.1 | 0     | 0     | 0.08  | 0      | 0.11   | 0.05  |
| GAIF01024341.1 | 9.16  | 5.46  | 16.12 | 0      | 0      | 9.42  |
| GAIF01024342.1 | 0.41  | 1.31  | 0     | 0.97   | 0      | 0     |
| GAIF01024343.1 | 0     | 0     | 0.23  | 0      | 0.27   | 0     |
| GAIF01024344.1 | 61.97 | 9.68  | 0.84  | 92.41  | 86.96  | 1.49  |
| GAIF01024345.1 | 0.66  | 0.16  | 0     | 0.33   | 2.77   | 0.83  |
| GAIF01024346.1 | 0.36  | 0.49  | 0     | 0      | 0.88   | 0     |
| GAIF01024347.1 | 0.15  | 0     | 0.81  | 0.19   | 0      | 0.36  |
| GAIF01024348.1 | 19.89 | 23.32 | 35    | 44.36  | 23.3   | 13    |
| GAIF01024350.1 | 70.08 | 77.39 | 107.8 | 359.95 | 312.79 | 94.3  |
| GAIF01024351.1 | 9.72  | 11.07 | 3     | 8.33   | 10.7   | 1.89  |

|                |         |         |         |        |        |        |
|----------------|---------|---------|---------|--------|--------|--------|
| GAIF01024352.1 | 0.43    | 0.23    | 0       | 1.79   | 9.22   | 0.24   |
| GAIF01024354.1 | 0       | 4.61    | 5.92    | 0.11   | 0      | 0.74   |
| GAIF01024356.1 | 0       | 0       | 0       | 0      | 0.13   | 0      |
| GAIF01024357.1 | 0.04    | 0.09    | 0       | 0      | 0.05   | 0.05   |
| GAIF01024360.1 | 0       | 0       | 0       | 0.01   | 0.54   | 0      |
| GAIF01024362.1 | 30      | 40.62   | 38.15   | 35.17  | 23.67  | 7.25   |
| GAIF01024363.1 | 0.22    | 0.24    | 0.25    | 1.92   | 3.54   | 0.25   |
| GAIF01024364.1 | 0.36    | 0.08    | 0       | 0.42   | 5.07   | 0.32   |
| GAIF01024367.1 | 0.65    | 0.57    | 0.14    | 3.02   | 8.75   | 0      |
| GAIF01024368.1 | 98.17   | 42.63   | 60.71   | 83.34  | 37.33  | 16.77  |
| GAIF01024373.1 | 0.91    | 0.57    | 0.57    | 1.81   | 2.82   | 1.44   |
| GAIF01024374.1 | 0       | 0       | 0       | 0.23   | 0.65   | 0      |
| GAIF01024375.1 | 0       | 0       | 0       | 0      | 0      | 0.06   |
| GAIF01024376.1 | 0       | 0       | 0       | 0      | 0.95   | 0      |
| GAIF01024377.1 | 39.43   | 21.24   | 5.25    | 249.13 | 148.59 | 151.17 |
| GAIF01024380.1 | 38.61   | 27.55   | 26.89   | 81.48  | 49.55  | 16.03  |
| GAIF01024381.1 | 0       | 0.12    | 0       | 0      | 0      | 0      |
| GAIF01024382.1 | 0.13    | 0       | 0       | 0      | 0.3    | 0      |
| GAIF01024383.1 | 0.61    | 0.33    | 0.34    | 1.05   | 1.7    | 0      |
| GAIF01024384.1 | 1.3     | 1.23    | 0       | 14.26  | 32.02  | 1.03   |
| GAIF01024385.1 | 10.43   | 7.12    | 10.69   | 17.65  | 17.42  | 14.27  |
| GAIF01024386.1 | 1.21    | 0.83    | 0.49    | 1.85   | 4.76   | 0.84   |
| GAIF01024387.1 | 0.04    | 0.04    | 0.04    | 0.49   | 3.64   | 0.17   |
| GAIF01024388.1 | 132.05  | 84.39   | 52.66   | 111.93 | 87.93  | 43.02  |
| GAIF01024389.1 | 0       | 0       | 0       | 39.54  | 64.11  | 0      |
| GAIF01024390.1 | 14.28   | 6.97    | 8.58    | 27.82  | 28.42  | 9.57   |
| GAIF01024392.1 | 1892.36 | 1896.92 | 2935.52 | 843.72 | 483.91 | 318.31 |
| GAIF01024394.1 | 0       | 0       | 0       | 0      | 0.11   | 0.1    |
| GAIF01024395.1 | 2.44    | 1       | 0.34    | 0.94   | 0.73   | 1.01   |
| GAIF01024398.1 | 2.01    | 0.18    | 0.18    | 7.37   | 27.24  | 9.86   |
| GAIF01024399.1 | 0.15    | 0       | 0       | 0.34   | 0      | 0.32   |
| GAIF01024404.1 | 0       | 0       | 0       | 0.06   | 0.13   | 0      |
| GAIF01024405.1 | 0       | 0       | 0       | 0      | 4.51   | 0      |
| GAIF01024406.1 | 0       | 0.03    | 0       | 0.15   | 0      | 0.16   |
| GAIF01024407.1 | 0.39    | 0.16    | 0       | 2.68   | 7.15   | 0.04   |
| GAIF01024408.1 | 9.42    | 5.69    | 5.77    | 17.77  | 27.81  | 12.13  |
| GAIF01024409.1 | 14.61   | 15.63   | 9.35    | 6.75   | 3.69   | 1.41   |
| GAIF01024410.1 | 8.09    | 5.95    | 6.97    | 15.31  | 16.91  | 8.5    |
| GAIF01024411.1 | 0       | 0       | 0       | 0.15   | 0.16   | 0      |
| GAIF01024414.1 | 10.24   | 13.72   | 20.7    | 31.62  | 14.16  | 7.72   |
| GAIF01024417.1 | 0.28    | 0       | 0.08    | 0.76   | 7.4    | 0.45   |
| GAIF01024418.1 | 0.1     | 0.21    | 0.21    | 1.11   | 1.15   | 0      |
| GAIF01024419.1 | 0.13    | 0       | 0.19    | 0.17   | 1.05   | 0      |
| GAIF01024420.1 | 0       | 0       | 0       | 0.26   | 2.21   | 0      |

|                |        |        |        |        |        |       |
|----------------|--------|--------|--------|--------|--------|-------|
| GAIF01024421.1 | 0      | 0.05   | 0.05   | 0      | 0.05   | 0     |
| GAIF01024422.1 | 0      | 0.34   | 0.27   | 0      | 0      | 0     |
| GAIF01024423.1 | 0      | 0.04   | 0      | 0      | 0      | 0     |
| GAIF01024425.1 | 23.66  | 27.68  | 19.44  | 39.82  | 28.73  | 7.34  |
| GAIF01024428.1 | 17.88  | 11.09  | 7.36   | 18.32  | 23.35  | 4.31  |
| GAIF01024429.1 | 0      | 0      | 0      | 0.12   | 0      | 0.11  |
| GAIF01024430.1 | 3.69   | 6.03   | 2.49   | 1.39   | 2.8    | 0.21  |
| GAIF01024431.1 | 344.04 | 552.38 | 406.13 | 183.8  | 192.12 | 59.03 |
| GAIF01024432.1 | 0.09   | 0.56   | 0      | 1.09   | 3.7    | 0     |
| GAIF01024433.1 | 0      | 0      | 0      | 0      | 3.75   | 0     |
| GAIF01024435.1 | 19.48  | 6.79   | 2.26   | 75.9   | 79.76  | 9.42  |
| GAIF01024436.1 | 0.39   | 0.39   | 0.31   | 0.5    | 0.35   | 0.05  |
| GAIF01024437.1 | 66.56  | 130.99 | 93.86  | 143.85 | 124.82 | 24.13 |
| GAIF01024438.1 | 0      | 0.25   | 1.1    | 0      | 0      | 0.51  |
| GAIF01024439.1 | 1.5    | 0.96   | 0.82   | 0.55   | 0.98   | 0     |
| GAIF01024440.1 | 0      | 0      | 0      | 0.32   | 0.35   | 0     |
| GAIF01024441.1 | 0      | 0      | 0      | 0      | 0.21   | 0.19  |
| GAIF01024443.1 | 26.98  | 13.81  | 23.5   | 23.5   | 8.93   | 21.47 |
| GAIF01024448.1 | 0.24   | 0      | 0      | 0.97   | 1.87   | 0.13  |
| GAIF01024451.1 | 15.66  | 22.24  | 9.06   | 42.63  | 29.59  | 12.62 |
| GAIF01024453.1 | 0.06   | 0      | 0      | 0.14   | 0.15   | 0.19  |
| GAIF01024454.1 | 23.52  | 5.91   | 7.43   | 12.74  | 9.27   | 3.23  |
| GAIF01024455.1 | 0      | 0.04   | 0.04   | 0      | 0      | 0     |
| GAIF01024456.1 | 0.11   | 0.12   | 0.36   | 0      | 0.26   | 0.12  |
| GAIF01024457.1 | 0      | 0      | 0      | 0      | 0      | 0.1   |
| GAIF01024458.1 | 17.96  | 36.18  | 10.35  | 4.37   | 3.28   | 0     |
| GAIF01024459.1 | 17.5   | 14.02  | 1.01   | 30.33  | 37.53  | 5.2   |
| GAIF01024460.1 | 17.32  | 11.45  | 7.12   | 23.05  | 46.67  | 18.83 |
| GAIF01024461.1 | 0.11   | 0      | 0      | 0.12   | 1.68   | 0.12  |
| GAIF01024462.1 | 0.48   | 0.1    | 0.21   | 3.22   | 20.39  | 0.95  |
| GAIF01024463.1 | 2.73   | 0.11   | 0.34   | 7.42   | 24.01  | 1.93  |
| GAIF01024464.1 | 40.42  | 35.98  | 42.35  | 23.5   | 16.21  | 10.33 |
| GAIF01024465.1 | 0      | 0      | 0      | 0.21   | 1.3    | 0     |
| GAIF01024466.1 | 0.05   | 0      | 0      | 1.19   | 5.41   | 0.11  |
| GAIF01024467.1 | 0.14   | 0      | 0      | 0.33   | 1.99   | 0.05  |
| GAIF01024468.1 | 0.67   | 0      | 0      | 0      | 3.15   | 0     |
| GAIF01024469.1 | 8.31   | 7.57   | 11.1   | 12.25  | 5.94   | 4.46  |
| GAIF01024471.1 | 0.68   | 0      | 0      | 1.6    | 2.58   | 0     |
| GAIF01024472.1 | 9.38   | 8.95   | 5.72   | 17.22  | 17.71  | 2.72  |
| GAIF01024474.1 | 11.88  | 11.16  | 9.4    | 27.19  | 24.89  | 6.27  |
| GAIF01024475.1 | 0.1    | 0      | 0      | 0.42   | 0.63   | 0     |
| GAIF01024477.1 | 0      | 0      | 0      | 0      | 0.03   | 0     |
| GAIF01024478.1 | 0.97   | 0.04   | 0.04   | 0      | 0      | 0     |
| GAIF01024479.1 | 0.26   | 0      | 0      | 0      | 0.45   | 0.1   |

|                |         |         |         |         |         |         |
|----------------|---------|---------|---------|---------|---------|---------|
| GAIF01024481.1 | 0       | 0       | 0       | 0       | 0.75    | 0       |
| GAIF01024482.1 | 0       | 0       | 0       | 1.66    | 8.97    | 0       |
| GAIF01024483.1 | 12.77   | 9.54    | 13.65   | 17.77   | 26.67   | 63.72   |
| GAIF01024485.1 | 0       | 0.31    | 0       | 0       | 0       | 0       |
| GAIF01024486.1 | 0.07    | 0.13    | 0       | 0.61    | 0.38    | 0       |
| GAIF01024487.1 | 9.76    | 5.46    | 3.5     | 14.75   | 24.22   | 45.69   |
| GAIF01024490.1 | 0.16    | 0.35    | 0.09    | 0.75    | 1.93    | 0.35    |
| GAIF01024492.1 | 0.09    | 0       | 0       | 0       | 0       | 0       |
| GAIF01024494.1 | 0.35    | 0.48    | 0.11    | 1.09    | 1.45    | 0.32    |
| GAIF01024495.1 | 58.03   | 87.68   | 40.05   | 70.16   | 74.32   | 22.95   |
| GAIF01024497.1 | 2.15    | 1.15    | 1.81    | 6.1     | 6.41    | 0.98    |
| GAIF01024499.1 | 0       | 0       | 0       | 0.15    | 0       | 0       |
| GAIF01024500.1 | 0       | 2.7     | 0       | 0       | 1       | 0       |
| GAIF01024503.1 | 0       | 0       | 0       | 0.15    | 0.35    | 0       |
| GAIF01024504.1 | 74.99   | 82.02   | 37.91   | 112.74  | 109.11  | 74.05   |
| GAIF01024505.1 | 0       | 0       | 0       | 0       | 0.19    | 0       |
| GAIF01024506.1 | 0.11    | 0       | 0       | 0.36    | 0       | 0.34    |
| GAIF01024509.1 | 11.48   | 6.77    | 9.93    | 4.56    | 1.69    | 2.71    |
| GAIF01024510.1 | 0.17    | 0.09    | 0       | 0.09    | 0       | 0       |
| GAIF01024511.1 | 0       | 0       | 0       | 0       | 0.14    | 0       |
| GAIF01024512.1 | 0       | 0       | 0.1     | 0       | 0       | 0       |
| GAIF01024515.1 | 0.12    | 0       | 0       | 0       | 0       | 0       |
| GAIF01024516.1 | 0       | 0       | 0.06    | 0       | 0.21    | 0.13    |
| GAIF01024520.1 | 1737.23 | 2721.19 | 1198.79 | 883.14  | 2065.22 | 1612.19 |
| GAIF01024522.1 | 1.42    | 0.9     | 2.94    | 0       | 0       | 0       |
| GAIF01024523.1 | 0.43    | 0       | 0       | 1.69    | 3.61    | 0       |
| GAIF01024524.1 | 0       | 0       | 0       | 0.07    | 0       | 0       |
| GAIF01024525.1 | 11.19   | 8.14    | 7.63    | 17.52   | 11.73   | 5.91    |
| GAIF01024526.1 | 60.96   | 73.95   | 46.36   | 308.76  | 152.63  | 28.52   |
| GAIF01024527.1 | 0.27    | 0.27    | 0.24    | 3.61    | 11.78   | 0.06    |
| GAIF01024529.1 | 0.06    | 0.21    | 0.28    | 0.51    | 0.83    | 0.07    |
| GAIF01024530.1 | 0       | 0       | 0       | 0.07    | 0       | 0       |
| GAIF01024531.1 | 667.83  | 99.8    | 71.98   | 1036.53 | 150.62  | 17.03   |
| GAIF01024532.1 | 0       | 0.26    | 0.84    | 0       | 0       | 0.26    |
| GAIF01024533.1 | 1.31    | 0.81    | 0.47    | 2.49    | 6.7     | 1.89    |
| GAIF01024534.1 | 3.4     | 2.18    | 2.88    | 22.77   | 22.11   | 0.17    |
| GAIF01024535.1 | 0       | 0       | 0       | 0.8     | 1.8     | 0       |
| GAIF01024538.1 | 0.03    | 0.3     | 0.01    | 0.02    | 0.02    | 0       |
| GAIF01024539.1 | 0.65    | 0.3     | 0.65    | 1.3     | 0.97    | 0.8     |
| GAIF01024541.1 | 71.71   | 51.99   | 54.28   | 240.69  | 367.24  | 90.78   |
| GAIF01024542.1 | 43.43   | 28.4    | 35.22   | 4.78    | 3.93    | 1.56    |
| GAIF01024544.1 | 36.44   | 26.21   | 36.76   | 39.73   | 31.83   | 33.34   |
| GAIF01024545.1 | 2558.74 | 11908.8 | 6904.05 | 165.52  | 338.66  | 208.93  |
| GAIF01024546.1 | 0       | 0       | 0.06    | 0       | 0       | 0       |

|                |       |        |       |        |        |        |
|----------------|-------|--------|-------|--------|--------|--------|
| GAIF01024548.1 | 0     | 0.11   | 0     | 0.12   | 0.84   | 0      |
| GAIF01024549.1 | 0     | 0.06   | 0.19  | 0      | 0      | 0      |
| GAIF01024550.1 | 0.02  | 0      | 0     | 0      | 0      | 0      |
| GAIF01024552.1 | 3.4   | 6.49   | 10.33 | 8.69   | 10.63  | 2.64   |
| GAIF01024553.1 | 23.86 | 34.52  | 44.01 | 40.78  | 28.51  | 9.64   |
| GAIF01024554.1 | 0.47  | 0      | 0.4   | 0      | 2.59   | 2.59   |
| GAIF01024555.1 | 0     | 0.06   | 0     | 0      | 0      | 0      |
| GAIF01024556.1 | 52.85 | 24.84  | 46.61 | 167.44 | 176.75 | 681.64 |
| GAIF01024557.1 | 0.26  | 0      | 0.01  | 0.69   | 4.84   | 0      |
| GAIF01024560.1 | 14.45 | 14.68  | 9.16  | 39.81  | 48.71  | 5.49   |
| GAIF01024561.1 | 0.09  | 0.1    | 0     | 0.1    | 0      | 0      |
| GAIF01024562.1 | 0     | 0      | 0     | 0.56   | 0      | 0      |
| GAIF01024563.1 | 3.12  | 0.68   | 0.19  | 4.21   | 17.12  | 5.13   |
| GAIF01024564.1 | 10.49 | 5.7    | 28.79 | 12.17  | 25.23  | 5.78   |
| GAIF01024565.1 | 0     | 0.52   | 0.35  | 0      | 0.06   | 0.23   |
| GAIF01024566.1 | 0.06  | 0      | 0     | 0      | 0      | 0      |
| GAIF01024568.1 | 62.29 | 30.14  | 28.97 | 130.56 | 175.57 | 104.36 |
| GAIF01024569.1 | 0.22  | 0.13   | 0.56  | 0.27   | 1.08   | 0.22   |
| GAIF01024571.1 | 0     | 0.02   | 0     | 0.16   | 1.09   | 0      |
| GAIF01024572.1 | 0.14  | 0      | 0     | 0.37   | 1.36   | 0      |
| GAIF01024573.1 | 4.62  | 2.91   | 1.3   | 8.23   | 14.49  | 16.25  |
| GAIF01024575.1 | 19.81 | 12.23  | 17.89 | 28.97  | 24.1   | 14.47  |
| GAIF01024577.1 | 5.6   | 8.35   | 8.08  | 20.8   | 12.03  | 2.73   |
| GAIF01024578.1 | 0     | 0      | 0     | 0.27   | 1.54   | 0.13   |
| GAIF01024579.1 | 0.03  | 0      | 0     | 0.39   | 0      | 0      |
| GAIF01024580.1 | 0.72  | 0.66   | 0     | 2.51   | 16.23  | 0.51   |
| GAIF01024582.1 | 36.44 | 32.53  | 19.59 | 16.75  | 17.64  | 10.64  |
| GAIF01024583.1 | 0.29  | 0.18   | 0     | 0.16   | 1.91   | 0      |
| GAIF01024584.1 | 0.06  | 0.27   | 0.14  | 0      | 0.08   | 0.07   |
| GAIF01024585.1 | 0.58  | 0      | 1.04  | 0      | 0      | 0      |
| GAIF01024586.1 | 0     | 0      | 0     | 0      | 0.09   | 0      |
| GAIF01024588.1 | 0     | 0      | 0     | 0.09   | 0      | 0      |
| GAIF01024590.1 | 0     | 0      | 0     | 0.11   | 0      | 0      |
| GAIF01024591.1 | 0     | 5.4    | 1.19  | 0      | 0.06   | 0.22   |
| GAIF01024592.1 | 6.25  | 3.26   | 5.36  | 12.62  | 16.68  | 12.46  |
| GAIF01024593.1 | 0.23  | 0      | 0.13  | 0      | 0      | 0      |
| GAIF01024594.1 | 0     | 0      | 0     | 0      | 0.15   | 0      |
| GAIF01024596.1 | 0     | 0      | 0     | 0.56   | 0.43   | 0      |
| GAIF01024600.1 | 0.74  | 0.42   | 0.14  | 4.79   | 6.44   | 0.11   |
| GAIF01024601.1 | 0     | 0      | 0.15  | 0      | 0      | 0      |
| GAIF01024602.1 | 0     | 0      | 0     | 0      | 0.15   | 0      |
| GAIF01024606.1 | 75.44 | 118.17 | 81.25 | 90.05  | 116.08 | 130.35 |
| GAIF01024607.1 | 0.11  | 0.08   | 0.08  | 0.53   | 1.38   | 0      |
| GAIF01024608.1 | 0     | 0      | 0     | 0      | 0.04   | 0.04   |



|                |        |        |        |       |        |        |
|----------------|--------|--------|--------|-------|--------|--------|
| GAIF01024609.1 | 16.31  | 7.12   | 4.65   | 8.79  | 13.59  | 6.93   |
| GAIF01024611.1 | 2.13   | 3.03   | 1.61   | 12.18 | 22.25  | 0.49   |
| GAIF01024612.1 | 0.36   | 0      | 0      | 0     | 0.74   | 0      |
| GAIF01024613.1 | 0.24   | 0      | 0      | 0.28  | 0.88   | 0      |
| GAIF01024615.1 | 1.35   | 0      | 1.45   | 0     | 0      | 0      |
| GAIF01024616.1 | 0.03   | 0      | 0      | 0     | 0      | 0      |
| GAIF01024617.1 | 2.44   | 2.05   | 0.08   | 2.51  | 3.02   | 0      |
| GAIF01024618.1 | 0      | 0      | 0.16   | 0     | 0      | 0.11   |
| GAIF01024619.1 | 1.9    | 0.94   | 0.05   | 0.6   | 1.83   | 1.8    |
| GAIF01024620.1 | 0.72   | 0.11   | 0.11   | 1.19  | 6.91   | 0.79   |
| GAIF01024621.1 | 0      | 0      | 0      | 0.13  | 0.59   | 0      |
| GAIF01024622.1 | 0.13   | 0      | 0      | 0     | 2.21   | 0      |
| GAIF01024623.1 | 2.35   | 2.62   | 1.15   | 3.73  | 1.93   | 0.54   |
| GAIF01024624.1 | 450.33 | 210.42 | 208.27 | 61.2  | 31.3   | 190.28 |
| GAIF01024625.1 | 0      | 0.02   | 0      | 0     | 0      | 0      |
| GAIF01024626.1 | 3.46   | 2.82   | 0      | 5.29  | 9.85   | 2.48   |
| GAIF01024627.1 | 0.02   | 0.05   | 0      | 0.03  | 0.06   | 0      |
| GAIF01024628.1 | 16.91  | 13.33  | 16.01  | 51.73 | 35.95  | 10.79  |
| GAIF01024629.1 | 9.94   | 7.48   | 6.15   | 17.52 | 26.84  | 5.95   |
| GAIF01024631.1 | 0.11   | 0      | 0      | 0.12  | 0.32   | 0.12   |
| GAIF01024632.1 | 0      | 0.81   | 0.33   | 0     | 0      | 0      |
| GAIF01024634.1 | 0      | 0.07   | 0      | 0     | 0      | 0      |
| GAIF01024636.1 | 0      | 0.08   | 0      | 0.09  | 0.66   | 0      |
| GAIF01024637.1 | 0      | 0.34   | 0      | 0.12  | 0      | 0      |
| GAIF01024638.1 | 18.99  | 8.59   | 2.71   | 80.72 | 181.81 | 33.45  |
| GAIF01024639.1 | 0      | 0.37   | 0      | 0     | 0.21   | 0      |
| GAIF01024640.1 | 0.92   | 0.69   | 0.08   | 0.66  | 0.34   | 0      |
| GAIF01024641.1 | 0.42   | 0.45   | 0.23   | 0.26  | 0      | 0.53   |
| GAIF01024642.1 | 0      | 0      | 0      | 0     | 0.19   | 0      |
| GAIF01024643.1 | 0.66   | 0.3    | 0      | 1.95  | 10.87  | 0.19   |
| GAIF01024644.1 | 0      | 0.18   | 0      | 0.51  | 0.25   | 0      |
| GAIF01024645.1 | 0.39   | 0      | 0      | 0.18  | 2.5    | 0      |
| GAIF01024646.1 | 0.5    | 0.26   | 0.16   | 6.28  | 32.04  | 0      |
| GAIF01024648.1 | 0      | 0      | 0.07   | 0     | 0      | 0      |
| GAIF01024649.1 | 0.14   | 0.06   | 0.03   | 0.38  | 1.11   | 0.24   |
| GAIF01024650.1 | 0      | 0      | 0      | 0     | 0      | 0.23   |
| GAIF01024652.1 | 0      | 0      | 0      | 0     | 0.53   | 0      |
| GAIF01024654.1 | 10.26  | 2.89   | 0.8    | 26.69 | 63.46  | 7.57   |
| GAIF01024655.1 | 0      | 0      | 0      | 0     | 0.07   | 0      |
| GAIF01024657.1 | 0      | 0.01   | 0      | 0     | 0      | 0      |
| GAIF01024659.1 | 2.59   | 2.4    | 0.41   | 12.25 | 34.4   | 4.54   |
| GAIF01024660.1 | 6.98   | 4.12   | 6.97   | 23.08 | 19.97  | 7.51   |
| GAIF01024661.1 | 17.14  | 20.08  | 40.18  | 34.37 | 23.91  | 20.99  |
| GAIF01024663.1 | 0      | 0      | 0      | 0     | 0.29   | 0      |

|                |        |        |        |        |        |       |
|----------------|--------|--------|--------|--------|--------|-------|
| GAIF01024665.1 | 0.5    | 0.14   | 0      | 0.58   | 1.66   | 0     |
| GAIF01024667.1 | 0.37   | 0.14   | 0      | 7.8    | 20.05  | 0.27  |
| GAIF01024668.1 | 0      | 0      | 0.05   | 0      | 0      | 0     |
| GAIF01024669.1 | 0      | 0.13   | 0      | 0.28   | 1.74   | 0     |
| GAIF01024670.1 | 0      | 0      | 0      | 0.29   | 0      | 0     |
| GAIF01024672.1 | 0.23   | 0      | 0.25   | 0.44   | 1.93   | 0     |
| GAIF01024673.1 | 8.23   | 5.12   | 5.81   | 16.6   | 21.67  | 4.86  |
| GAIF01024674.1 | 1.74   | 5.55   | 2.92   | 0.95   | 0.12   | 0.11  |
| GAIF01024675.1 | 0      | 0      | 0      | 0      | 2.16   | 0.2   |
| GAIF01024677.1 | 1.35   | 0.35   | 0      | 0.75   | 1.55   | 0.5   |
| GAIF01024678.1 | 25.56  | 28.28  | 14.77  | 85.24  | 87.98  | 34.43 |
| GAIF01024679.1 | 0.32   | 0.35   | 0      | 2.7    | 12.55  | 0     |
| GAIF01024681.1 | 0.23   | 0.26   | 0      | 1.36   | 6.5    | 0     |
| GAIF01024682.1 | 2.63   | 0.59   | 0.85   | 0      | 2.03   | 1.02  |
| GAIF01024683.1 | 10.11  | 7.08   | 14.38  | 28.71  | 26.16  | 12.45 |
| GAIF01024684.1 | 8.52   | 8.47   | 5.99   | 20.05  | 9.48   | 1.72  |
| GAIF01024687.1 | 49.99  | 106.78 | 115.81 | 148.24 | 162.86 | 86.98 |
| GAIF01024688.1 | 2.39   | 0.82   | 0.14   | 5.83   | 16.16  | 2.91  |
| GAIF01024689.1 | 0.05   | 0      | 0      | 0.06   | 0      | 0     |
| GAIF01024690.1 | 0      | 0      | 0      | 0      | 0      | 0.24  |
| GAIF01024691.1 | 10.2   | 3.02   | 3.56   | 14.6   | 32.75  | 17.87 |
| GAIF01024692.1 | 3.58   | 4.12   | 1.69   | 0.91   | 0.09   | 0.08  |
| GAIF01024693.1 | 0      | 0.2    | 0.12   | 0      | 0      | 1.9   |
| GAIF01024694.1 | 7.77   | 6.57   | 6.95   | 16.34  | 9.81   | 6.02  |
| GAIF01024695.1 | 0.04   | 0      | 0      | 0      | 0.05   | 0.05  |
| GAIF01024696.1 | 45.19  | 24.74  | 61.21  | 89.27  | 50.14  | 78.48 |
| GAIF01024698.1 | 18.58  | 4.89   | 10.02  | 5.69   | 3.93   | 7.86  |
| GAIF01024699.1 | 0.51   | 0.55   | 0      | 5.08   | 18.25  | 0     |
| GAIF01024700.1 | 1.34   | 0.79   | 0.8    | 4.23   | 9.21   | 0.4   |
| GAIF01024701.1 | 101.12 | 9.35   | 0.48   | 28.72  | 93.02  | 0     |
| GAIF01024706.1 | 0      | 0.02   | 0      | 0      | 0.4    | 0     |
| GAIF01024707.1 | 19.69  | 14.92  | 16.37  | 72.47  | 42.69  | 9.64  |
| GAIF01024708.1 | 0      | 0      | 0.1    | 0      | 0      | 0.1   |
| GAIF01024711.1 | 8.16   | 6.76   | 9.08   | 21.97  | 24.71  | 17.84 |
| GAIF01024712.1 | 0.11   | 0.17   | 0      | 0.04   | 0.05   | 0     |
| GAIF01024714.1 | 2.92   | 2.82   | 0.21   | 0.39   | 0.24   | 8.16  |
| GAIF01024715.1 | 0.1    | 0      | 0.06   | 0      | 0      | 0     |
| GAIF01024716.1 | 0      | 0.13   | 0.19   | 0.77   | 1.72   | 0     |
| GAIF01024717.1 | 18.4   | 11.14  | 14.12  | 16.44  | 16.13  | 8.55  |
| GAIF01024719.1 | 0.18   | 0.1    | 0.07   | 0.9    | 4.33   | 0.49  |
| GAIF01024721.1 | 4.65   | 1.7    | 1.92   | 3.55   | 1.76   | 0     |
| GAIF01024722.1 | 7.22   | 6.83   | 2.07   | 8.02   | 20.02  | 2.42  |
| GAIF01024723.1 | 6.67   | 0.47   | 0.16   | 36.93  | 165.9  | 2.64  |
| GAIF01024724.1 | 0.2    | 0      | 0      | 0.23   | 0.72   | 0     |

|                |        |        |        |         |        |       |
|----------------|--------|--------|--------|---------|--------|-------|
| GAIF01024725.1 | 0      | 0      | 0      | 0       | 0.1    | 0     |
| GAIF01024726.1 | 16.16  | 18.86  | 11.57  | 58.83   | 34.84  | 6.13  |
| GAIF01024727.1 | 0      | 0.06   | 0.06   | 0.6     | 2.11   | 0.17  |
| GAIF01024728.1 | 0      | 0      | 0      | 0.1     | 0.03   | 0     |
| GAIF01024729.1 | 21.66  | 13.7   | 12.65  | 29.38   | 35.02  | 12.92 |
| GAIF01024730.1 | 111.16 | 119.09 | 19.43  | 1.55    | 1.2    | 0.38  |
| GAIF01024732.1 | 21.16  | 31.93  | 8.44   | 54.61   | 60.62  | 1.32  |
| GAIF01024733.1 | 0      | 0      | 0      | 0.31    | 1.01   | 0.18  |
| GAIF01024734.1 | 9.5    | 5.58   | 7.18   | 9.86    | 10.87  | 13.43 |
| GAIF01024736.1 | 0      | 0      | 0.09   | 0       | 0.21   | 0     |
| GAIF01024737.1 | 0      | 0      | 0      | 0       | 0.15   | 0     |
| GAIF01024739.1 | 24.4   | 17.35  | 17.3   | 34.73   | 35.43  | 12.31 |
| GAIF01024740.1 | 0.06   | 0.62   | 0.52   | 0.18    | 0.35   | 0.63  |
| GAIF01024741.1 | 17.83  | 9.28   | 7.07   | 2.38    | 1.41   | 0.61  |
| GAIF01024742.1 | 0.2    | 0.5    | 0      | 9.87    | 78.84  | 0     |
| GAIF01024744.1 | 0      | 0.14   | 0      | 0       | 0      | 0.14  |
| GAIF01024745.1 | 0      | 0.14   | 0      | 0       | 0.89   | 0     |
| GAIF01024746.1 | 0      | 0      | 0      | 0       | 1      | 0     |
| GAIF01024747.1 | 0      | 0      | 0      | 0       | 0.39   | 0     |
| GAIF01024748.1 | 0.4    | 0      | 0      | 0.43    | 1.34   | 0     |
| GAIF01024749.1 | 225.19 | 305.21 | 152.24 | 1056.43 | 987.45 | 95.63 |
| GAIF01024752.1 | 0      | 0      | 0      | 0.2     | 0.42   | 0     |
| GAIF01024755.1 | 22.57  | 15.58  | 11.98  | 13.31   | 16.84  | 14.52 |
| GAIF01024757.1 | 19.86  | 9.93   | 5.69   | 52.89   | 55.34  | 8.66  |
| GAIF01024758.1 | 13.73  | 1.7    | 2.61   | 11.62   | 23.38  | 2.99  |
| GAIF01024759.1 | 0      | 0      | 0      | 0.12    | 0.38   | 0     |
| GAIF01024761.1 | 0      | 0      | 0.06   | 0.27    | 0.83   | 0     |
| GAIF01024762.1 | 0.08   | 0.09   | 0      | 0       | 0      | 0     |
| GAIF01024763.1 | 0      | 0      | 0      | 1.15    | 6.53   | 0     |
| GAIF01024764.1 | 13.9   | 15     | 28.01  | 32.2    | 20.99  | 17.43 |
| GAIF01024765.1 | 3.48   | 45.59  | 5.46   | 1.15    | 9.57   | 0.18  |
| GAIF01024766.1 | 0      | 0      | 0      | 0.45    | 1.06   | 0.03  |
| GAIF01024767.1 | 77.82  | 100.36 | 101.73 | 106.87  | 90.98  | 45.24 |
| GAIF01024768.1 | 0.16   | 0      | 0      | 0       | 0      | 0     |
| GAIF01024770.1 | 0.14   | 0      | 0.04   | 0.21    | 0.13   | 0.27  |
| GAIF01024772.1 | 6.42   | 6.83   | 7.69   | 14.95   | 24.33  | 7.54  |
| GAIF01024773.1 | 0.18   | 0.04   | 0      | 0.89    | 5.32   | 0.04  |
| GAIF01024775.1 | 0.19   | 0      | 0      | 0.04    | 0.09   | 0     |
| GAIF01024776.1 | 0      | 0      | 0      | 0.37    | 0.47   | 0.09  |
| GAIF01024778.1 | 0.19   | 0.07   | 0      | 0.22    | 0.52   | 0     |
| GAIF01024779.1 | 0      | 0      | 0      | 0.19    | 0.1    | 0     |
| GAIF01024780.1 | 0.02   | 0.1    | 0      | 0.25    | 1.9    | 0.03  |
| GAIF01024781.1 | 0.36   | 0.52   | 0.26   | 0.14    | 0.14   | 0.4   |
| GAIF01024783.1 | 19.17  | 1.87   | 2.13   | 108.74  | 449.93 | 58.63 |

|                |         |         |         |         |         |         |
|----------------|---------|---------|---------|---------|---------|---------|
| GAIF01024784.1 | 0       | 0.13    | 0       | 0.14    | 0.64    | 0       |
| GAIF01024786.1 | 0       | 0       | 0       | 1.09    | 3.63    | 0.18    |
| GAIF01024787.1 | 0       | 0.09    | 0       | 0       | 0.1     | 0       |
| GAIF01024789.1 | 0.45    | 0.49    | 0       | 0.37    | 1.16    | 0       |
| GAIF01024790.1 | 0       | 0       | 0.1     | 0       | 0       | 0       |
| GAIF01024791.1 | 0       | 0.04    | 0       | 0       | 0       | 0       |
| GAIF01024792.1 | 0.21    | 0       | 0       | 0.12    | 0       | 0.11    |
| GAIF01024793.1 | 0.08    | 0.09    | 0       | 0.28    | 0.59    | 0.09    |
| GAIF01024795.1 | 42.2    | 51.66   | 49.55   | 11.14   | 6.87    | 10.54   |
| GAIF01024796.1 | 0       | 0       | 0.11    | 0       | 0       | 0       |
| GAIF01024800.1 | 0       | 0       | 0       | 0       | 0.27    | 0.07    |
| GAIF01024801.1 | 3851.94 | 3912.41 | 3730.03 | 1968.72 | 1954.94 | 4152.31 |
| GAIF01024803.1 | 0.36    | 0.1     | 0.1     | 0.84    | 6.52    | 0.2     |
| GAIF01024804.1 | 10.84   | 7.83    | 10.01   | 29.29   | 23.74   | 9.52    |
| GAIF01024805.1 | 0.08    | 0       | 0       | 0.16    | 0.19    | 0       |
| GAIF01024806.1 | 0.24    | 0       | 0       | 2.52    | 6.53    | 0       |
| GAIF01024807.1 | 0       | 0       | 1.68    | 0       | 0       | 0       |
| GAIF01024809.1 | 6.04    | 7.49    | 0.94    | 17.73   | 13.82   | 3.63    |
| GAIF01024810.1 | 0.68    | 1.62    | 1       | 0       | 2.73    | 1       |
| GAIF01024811.1 | 18.11   | 3.1     | 7.56    | 16.11   | 5.91    | 12.9    |
| GAIF01024812.1 | 0.11    | 0       | 0       | 0.04    | 0.48    | 0       |
| GAIF01024813.1 | 0       | 0.17    | 0       | 0.54    | 1.5     | 0       |
| GAIF01024814.1 | 0       | 0       | 0       | 0.35    | 1.29    | 0       |
| GAIF01024818.1 | 258.33  | 159.34  | 138.9   | 65.99   | 181.01  | 527.55  |
| GAIF01024821.1 | 12.13   | 6.77    | 11.37   | 23.09   | 37.1    | 28.79   |
| GAIF01024823.1 | 35.75   | 43.5    | 42.93   | 68.88   | 72.96   | 27.96   |
| GAIF01024825.1 | 7.89    | 33.66   | 63.07   | 0       | 0       | 17.4    |
| GAIF01024826.1 | 0.35    | 1.39    | 1.05    | 0.56    | 0.23    | 0       |
| GAIF01024827.1 | 26.92   | 22.93   | 7.28    | 39.7    | 45.4    | 4.2     |
| GAIF01024829.1 | 0.09    | 0.2     | 0       | 0.33    | 0       | 0       |
| GAIF01024831.1 | 22.06   | 19.99   | 10.93   | 2.4     | 3.05    | 0.98    |
| GAIF01024833.1 | 0       | 0       | 0       | 0       | 0.15    | 0       |
| GAIF01024834.1 | 0       | 1.3     | 0.16    | 0       | 0.04    | 0       |
| GAIF01024837.1 | 12.42   | 12.44   | 15.3    | 24.61   | 12.57   | 7.95    |
| GAIF01024840.1 | 6.41    | 11.06   | 0.05    | 1.48    | 3.88    | 0.11    |
| GAIF01024841.1 | 1.07    | 1.74    | 0.42    | 0.35    | 0.37    | 0.25    |
| GAIF01024842.1 | 0.38    | 0       | 0.25    | 0.18    | 0       | 0       |
| GAIF01024843.1 | 0.99    | 0.93    | 0.48    | 6.5     | 9.64    | 0.73    |
| GAIF01024844.1 | 0.27    | 0.22    | 0       | 0.24    | 2.72    | 0       |
| GAIF01024845.1 | 0       | 0       | 0       | 0       | 0.25    | 0.18    |
| GAIF01024846.1 | 0.04    | 0.04    | 0       | 0.04    | 0.09    | 0       |
| GAIF01024848.1 | 0.11    | 0.06    | 0       | 0       | 0.07    | 0       |
| GAIF01024849.1 | 9.45    | 14.12   | 18.51   | 18.64   | 12.6    | 6.15    |
| GAIF01024850.1 | 6.7     | 10.15   | 2.11    | 1.08    | 2.28    | 0       |

|                |        |       |        |        |        |        |
|----------------|--------|-------|--------|--------|--------|--------|
| GAIF01024851.1 | 0      | 0     | 0      | 0.04   | 0      | 0      |
| GAIF01024855.1 | 0.05   | 0     | 0      | 0      | 0      | 0      |
| GAIF01024856.1 | 7.33   | 8.05  | 6.52   | 17.44  | 11.72  | 3.07   |
| GAIF01024857.1 | 40.3   | 36.74 | 83.14  | 104.9  | 54.62  | 122.39 |
| GAIF01024860.1 | 9.59   | 10.03 | 11.21  | 23.56  | 32.82  | 24.62  |
| GAIF01024862.1 | 0      | 0     | 0      | 0.17   | 0.36   | 0.16   |
| GAIF01024864.1 | 0.1    | 0.11  | 0.06   | 0      | 0      | 0.06   |
| GAIF01024866.1 | 3.06   | 0     | 0.2    | 0.9    | 5.35   | 1.96   |
| GAIF01024867.1 | 143.88 | 71.54 | 37.95  | 89.23  | 69.7   | 24.13  |
| GAIF01024868.1 | 2.38   | 1.04  | 2.21   | 3.93   | 12.86  | 0.23   |
| GAIF01024869.1 | 7.06   | 0.3   | 0.41   | 21.68  | 56.3   | 119.46 |
| GAIF01024871.1 | 47.48  | 57.09 | 58.96  | 39.33  | 38.73  | 63.62  |
| GAIF01024873.1 | 2.83   | 1.82  | 0.66   | 4.19   | 9.29   | 0.14   |
| GAIF01024874.1 | 0      | 0     | 0.15   | 0.32   | 1.5    | 0      |
| GAIF01024875.1 | 9.05   | 6.34  | 7.72   | 2.26   | 0.65   | 0.07   |
| GAIF01024876.1 | 89.47  | 85.85 | 264.76 | 90.99  | 50.9   | 272.31 |
| GAIF01024877.1 | 0      | 0     | 0.36   | 0.13   | 0.4    | 0      |
| GAIF01024878.1 | 0      | 0     | 0      | 0.08   | 0.12   | 0      |
| GAIF01024879.1 | 12.94  | 17.01 | 21.79  | 45.5   | 34.5   | 8.56   |
| GAIF01024880.1 | 33.99  | 42.35 | 47.4   | 7.04   | 5.74   | 3.64   |
| GAIF01024881.1 | 2.26   | 1.59  | 0.25   | 4.45   | 11.72  | 0.25   |
| GAIF01024882.1 | 0      | 0.17  | 0.69   | 0      | 0      | 0      |
| GAIF01024883.1 | 9.21   | 0.97  | 0.27   | 8.53   | 22.34  | 1.25   |
| GAIF01024884.1 | 3.88   | 1.79  | 1.43   | 0.9    | 1.05   | 0.27   |
| GAIF01024886.1 | 0.45   | 0.51  | 0.25   | 0.98   | 1.44   | 0      |
| GAIF01024887.1 | 0.05   | 0.34  | 0.14   | 0.05   | 0.15   | 0.12   |
| GAIF01024888.1 | 10.14  | 14.61 | 10.01  | 16.41  | 18     | 4.15   |
| GAIF01024889.1 | 2.46   | 2.51  | 1.07   | 11.52  | 25.65  | 2.02   |
| GAIF01024890.1 | 0      | 0.27  | 0.24   | 0      | 0      | 0      |
| GAIF01024892.1 | 0      | 0.29  | 0      | 0      | 0.15   | 0      |
| GAIF01024894.1 | 47.6   | 92.29 | 23.56  | 182.99 | 183.94 | 5.61   |
| GAIF01024895.1 | 8.22   | 7.02  | 7.71   | 17.31  | 20.23  | 15.88  |
| GAIF01024896.1 | 0.01   | 0     | 0      | 0.02   | 0.54   | 0      |
| GAIF01024898.1 | 1.02   | 0.02  | 0.69   | 0.12   | 2.45   | 0      |
| GAIF01024899.1 | 0      | 0     | 0      | 0      | 0.05   | 0      |
| GAIF01024900.1 | 1.15   | 0.73  | 0.64   | 1.67   | 0.88   | 0.56   |
| GAIF01024901.1 | 0      | 0.02  | 0.2    | 0.02   | 0.27   | 0      |
| GAIF01024902.1 | 2.64   | 4.14  | 1.32   | 1.17   | 0.47   | 0.18   |
| GAIF01024903.1 | 0      | 0     | 0      | 0      | 0.08   | 0      |
| GAIF01024904.1 | 3.96   | 1.08  | 5.52   | 4.03   | 1.78   | 10.38  |
| GAIF01024905.1 | 0      | 0     | 0      | 0.12   | 0      | 0      |
| GAIF01024906.1 | 0      | 0.5   | 1.22   | 0.47   | 1.2    | 0.77   |
| GAIF01024907.1 | 0.35   | 0.5   | 0.89   | 0.67   | 0.14   | 0.13   |
| GAIF01024908.1 | 0      | 0.41  | 0      | 0.46   | 1.02   | 0      |

|                |        |        |        |        |        |        |
|----------------|--------|--------|--------|--------|--------|--------|
| GAIF01024909.1 | 267.47 | 179.31 | 47.82  | 439.38 | 360.97 | 29.16  |
| GAIF01024910.1 | 0      | 0      | 0.08   | 0      | 0      | 0      |
| GAIF01024913.1 | 0      | 0      | 0.09   | 0.09   | 0      | 0      |
| GAIF01024914.1 | 0.55   | 0.3    | 0      | 170.72 | 224.85 | 388.62 |
| GAIF01024915.1 | 0      | 0      | 0      | 0.46   | 0.96   | 0.15   |
| GAIF01024916.1 | 0.15   | 0.07   | 0.07   | 0.63   | 0.18   | 0.05   |
| GAIF01024917.1 | 0      | 0.1    | 0.05   | 0      | 0.16   | 0      |
| GAIF01024918.1 | 0.43   | 0.09   | 0.28   | 0.1    | 0      | 0      |
| GAIF01024919.1 | 148.4  | 99.29  | 32.34  | 78.99  | 100.65 | 97.45  |
| GAIF01024920.1 | 18.75  | 0.66   | 1.32   | 3.15   | 0.09   | 0.17   |
| GAIF01024921.1 | 0.38   | 0      | 0      | 0.09   | 0.28   | 0      |
| GAIF01024922.1 | 19.99  | 10.69  | 4.78   | 49.91  | 69.82  | 15.89  |
| GAIF01024923.1 | 19.51  | 0      | 0.96   | 7.89   | 1.19   | 3.62   |
| GAIF01024924.1 | 29.62  | 9.89   | 12.69  | 61.22  | 44.48  | 141.94 |
| GAIF01024925.1 | 0.27   | 0.07   | 0.07   | 0.93   | 1.68   | 0.44   |
| GAIF01024926.1 | 10.56  | 0      | 16.03  | 0      | 0      | 9.17   |
| GAIF01024927.1 | 1.45   | 0.14   | 0.14   | 3.41   | 5.88   | 1.05   |
| GAIF01024928.1 | 25.72  | 15     | 14.63  | 86.63  | 109.6  | 16.68  |
| GAIF01024931.1 | 156.4  | 175.5  | 136.46 | 210.84 | 257.46 | 76.71  |
| GAIF01024932.1 | 0.54   | 0.48   | 0.49   | 0.63   | 0.77   | 0      |
| GAIF01024933.1 | 0.04   | 0      | 0      | 0      | 0      | 0      |
| GAIF01024934.1 | 0.3    | 0      | 0      | 2.63   | 10.35  | 2.99   |
| GAIF01024935.1 | 44.91  | 14.78  | 5.59   | 29     | 35.26  | 3.56   |
| GAIF01024937.1 | 1.09   | 1.98   | 2.1    | 1.85   | 2.14   | 0.45   |
| GAIF01024938.1 | 0      | 0      | 0      | 0      | 0.06   | 0      |
| GAIF01024939.1 | 1.8    | 1.07   | 2.35   | 2.58   | 0.6    | 2.84   |
| GAIF01024940.1 | 3.01   | 2.25   | 0.82   | 16.78  | 26.65  | 2.28   |
| GAIF01024943.1 | 2.97   | 8      | 0.84   | 21.93  | 43.33  | 0.24   |
| GAIF01024944.1 | 0      | 0      | 0      | 0      | 0.02   | 0      |
| GAIF01024945.1 | 13.86  | 13.96  | 18.31  | 29.29  | 23.45  | 39.07  |
| GAIF01024947.1 | 0      | 0      | 0.22   | 1      | 3.94   | 0      |
| GAIF01024949.1 | 0      | 0      | 0      | 0.18   | 0.25   | 0      |
| GAIF01024952.1 | 0.43   | 0.31   | 0      | 0.77   | 1.09   | 0.16   |
| GAIF01024953.1 | 0      | 0      | 0      | 0.13   | 0      | 0      |
| GAIF01024955.1 | 0.09   | 0      | 0      | 0      | 0.98   | 0      |
| GAIF01024956.1 | 12.22  | 19.73  | 17.1   | 23.32  | 13.41  | 2.83   |
| GAIF01024958.1 | 2.65   | 1.19   | 2.85   | 1.71   | 0.78   | 1.54   |
| GAIF01024959.1 | 2.8    | 3.26   | 0.24   | 6.34   | 9.33   | 2.76   |
| GAIF01024960.1 | 0      | 0.05   | 0      | 0      | 0      | 0      |
| GAIF01024961.1 | 0.35   | 2.23   | 5.03   | 1.09   | 0      | 1.05   |
| GAIF01024962.1 | 20.35  | 0.28   | 1.13   | 3.52   | 0.19   | 0.11   |
| GAIF01024963.1 | 0      | 0.05   | 0      | 0.14   | 0.05   | 0.05   |
| GAIF01024964.1 | 0.11   | 0      | 0.06   | 0.13   | 0.26   | 0      |
| GAIF01024965.1 | 0.1    | 0.06   | 0.15   | 0.18   | 0.09   | 0      |

|                |         |       |         |         |        |         |
|----------------|---------|-------|---------|---------|--------|---------|
| GAIF01024967.1 | 0       | 0     | 0       | 0       | 0      | 0.34    |
| GAIF01024968.1 | 18.63   | 28.02 | 25.83   | 38.2    | 43.62  | 23      |
| GAIF01024969.1 | 0.16    | 0.09  | 0.09    | 0.05    | 0      | 0.04    |
| GAIF01024971.1 | 0       | 0.09  | 0.11    | 0.02    | 0.02   | 0.13    |
| GAIF01024972.1 | 0.42    | 0.1   | 0.1     | 0.9     | 4.69   | 2.56    |
| GAIF01024973.1 | 8.39    | 3.14  | 8.32    | 7.88    | 12.65  | 11.64   |
| GAIF01024976.1 | 0       | 0     | 0       | 0.05    | 0.05   | 0       |
| GAIF01024977.1 | 21.52   | 16.55 | 14.96   | 24.57   | 37.81  | 5.62    |
| GAIF01024980.1 | 0       | 0     | 0       | 0.26    | 1.22   | 0.62    |
| GAIF01024981.1 | 11.42   | 12.51 | 9.02    | 26.2    | 22.63  | 3.28    |
| GAIF01024982.1 | 0       | 0     | 0       | 0       | 0.07   | 0.02    |
| GAIF01024989.1 | 0.28    | 0     | 0       | 1.46    | 2.77   | 2.38    |
| GAIF01024990.1 | 0.16    | 0.11  | 0.17    | 1.13    | 4.09   | 2.34    |
| GAIF01024991.1 | 2.34    | 1.02  | 0.26    | 15.73   | 58.16  | 0.26    |
| GAIF01024992.1 | 14.64   | 18.4  | 27.82   | 55.46   | 35.71  | 14.46   |
| GAIF01024993.1 | 0.66    | 0     | 0       | 0.48    | 2.39   | 2.56    |
| GAIF01024995.1 | 2193.22 | 2312  | 3369.52 | 1346.63 | 1041.5 | 4217.97 |
| GAIF01024996.1 | 0.31    | 0.17  | 0       | 2.36    | 9.59   | 0       |
| GAIF01024997.1 | 18.47   | 21.34 | 17.49   | 28.23   | 19.24  | 7.85    |
| GAIF01024999.1 | 1.24    | 1.62  | 1.63    | 3.45    | 0.6    | 2.19    |
| GAIF01025000.1 | 0       | 0.22  | 0       | 0.72    | 3.98   | 0.23    |
| GAIF01025001.1 | 0       | 0     | 0       | 0.45    | 2.82   | 4.39    |
| GAIF01025004.1 | 0       | 0     | 0       | 3.75    | 0      | 0.63    |
| GAIF01025005.1 | 0.02    | 0.02  | 0.03    | 0       | 0.02   | 0       |
| GAIF01025007.1 | 0.1     | 0     | 0       | 0       | 0      | 0       |
| GAIF01025008.1 | 0       | 0.38  | 0       | 1.09    | 0      | 0       |
| GAIF01025010.1 | 0       | 0.13  | 0       | 0.01    | 0.55   | 0       |
| GAIF01025011.1 | 0       | 0     | 0       | 0       | 0      | 0.15    |
| GAIF01025012.1 | 0.44    | 0.08  | 0.11    | 0.08    | 0      | 0.02    |
| GAIF01025013.1 | 20.41   | 15.78 | 19.92   | 36.32   | 18.31  | 7.35    |
| GAIF01025014.1 | 0.09    | 0     | 0       | 0       | 0.11   | 0       |
| GAIF01025015.1 | 0.04    | 0     | 0       | 0.2     | 0.94   | 0.09    |
| GAIF01025016.1 | 0.03    | 0.22  | 0       | 0       | 0      | 0       |
| GAIF01025017.1 | 39.43   | 40.09 | 15.97   | 64.08   | 81.61  | 3.16    |
| GAIF01025018.1 | 0.23    | 0.14  | 0.35    | 0.08    | 0.25   | 0.05    |
| GAIF01025019.1 | 0.18    | 0.08  | 0.04    | 0.62    | 1.83   | 0       |
| GAIF01025020.1 | 0.06    | 0     | 0.17    | 0.74    | 2.52   | 0.27    |
| GAIF01025021.1 | 103.57  | 52.52 | 50.12   | 223.88  | 260.71 | 98.96   |
| GAIF01025024.1 | 0.24    | 0     | 0       | 2.11    | 10.88  | 0       |
| GAIF01025025.1 | 3.99    | 5.18  | 1.63    | 34.93   | 43.12  | 1.28    |
| GAIF01025026.1 | 0.88    | 0.25  | 0       | 5.49    | 15.79  | 0.06    |
| GAIF01025027.1 | 25.03   | 18.37 | 29.33   | 32.72   | 38.61  | 77.17   |
| GAIF01025029.1 | 0.19    | 0.46  | 0.05    | 4.51    | 10.53  | 0.05    |
| GAIF01025030.1 | 12.17   | 12.57 | 20.15   | 14.87   | 14.36  | 6.95    |

|                |         |         |         |         |        |         |
|----------------|---------|---------|---------|---------|--------|---------|
| GAIF01025031.1 | 0       | 0       | 0.15    | 0.72    | 2.81   | 0       |
| GAIF01025033.1 | 0.88    | 0.3     | 0.23    | 3.73    | 17.3   | 0       |
| GAIF01025034.1 | 1.45    | 2.78    | 0.47    | 6.32    | 5.73   | 0.19    |
| GAIF01025035.1 | 3.01    | 0.89    | 0       | 7.3     | 8.39   | 4.52    |
| GAIF01025036.1 | 0.18    | 0       | 0       | 0       | 0.14   | 0       |
| GAIF01025037.1 | 24.89   | 26.27   | 8.14    | 66.98   | 96.76  | 0.73    |
| GAIF01025039.1 | 0       | 0       | 0.14    | 0       | 0      | 0.14    |
| GAIF01025040.1 | 1.97    | 2.04    | 2.36    | 1.73    | 1.79   | 1.21    |
| GAIF01025041.1 | 0       | 0       | 0       | 0       | 0.22   | 0       |
| GAIF01025042.1 | 0.09    | 0       | 0.03    | 0.17    | 0.11   | 0       |
| GAIF01025043.1 | 0       | 0.55    | 0.62    | 0.02    | 0.03   | 0.22    |
| GAIF01025045.1 | 4.2     | 3.05    | 2.5     | 0.2     | 0      | 0       |
| GAIF01025046.1 | 14.28   | 8.29    | 12.96   | 16.3    | 8.24   | 10.07   |
| GAIF01025047.1 | 0       | 0.19    | 0       | 0.6     | 3.75   | 0       |
| GAIF01025048.1 | 0.31    | 0.64    | 0.11    | 0       | 0      | 0       |
| GAIF01025049.1 | 0.14    | 0.08    | 0.16    | 0.74    | 0      | 0       |
| GAIF01025053.1 | 7.21    | 9.84    | 5.1     | 2       | 1.86   | 0.85    |
| GAIF01025055.1 | 5.79    | 5.92    | 11.66   | 25.85   | 25.18  | 4.07    |
| GAIF01025059.1 | 0.26    | 0.11    | 0       | 1.09    | 6.17   | 0.21    |
| GAIF01025060.1 | 0       | 0.1     | 0.05    | 0.05    | 0      | 0       |
| GAIF01025061.1 | 0.45    | 0.33    | 0.17    | 0.26    | 0.81   | 0.25    |
| GAIF01025063.1 | 10.78   | 18.76   | 9.33    | 34.44   | 20.75  | 2.09    |
| GAIF01025064.1 | 0       | 0.45    | 0.76    | 0       | 0      | 0.19    |
| GAIF01025065.1 | 6.29    | 6.37    | 5.24    | 23.92   | 15.54  | 0       |
| GAIF01025066.1 | 0       | 0       | 0       | 0       | 0      | 0.27    |
| GAIF01025067.1 | 0.14    | 0.18    | 0       | 1.85    | 11.31  | 0.42    |
| GAIF01025068.1 | 0       | 0       | 0       | 1.87    | 5.57   | 0       |
| GAIF01025069.1 | 15.58   | 13.37   | 28.16   | 25.63   | 39.16  | 46.75   |
| GAIF01025070.1 | 0.16    | 0       | 0       | 0.17    | 0      | 0       |
| GAIF01025071.1 | 2.05    | 0.39    | 0.17    | 2.59    | 12.99  | 1.34    |
| GAIF01025072.1 | 2703.69 | 1849.49 | 1436.23 | 1289.79 | 674.28 | 2768.84 |
| GAIF01025073.1 | 0       | 0       | 0       | 0       | 0.07   | 0       |
| GAIF01025074.1 | 0.07    | 1.04    | 0.31    | 0.54    | 1.03   | 0.11    |
| GAIF01025075.1 | 0       | 0       | 0       | 0       | 0.11   | 0       |
| GAIF01025076.1 | 14.68   | 9.22    | 1.29    | 13.41   | 20.18  | 9.34    |
| GAIF01025078.1 | 0.59    | 0.2     | 0.17    | 2.47    | 5.94   | 0.21    |
| GAIF01025079.1 | 45.35   | 49.15   | 68.9    | 80.59   | 46.15  | 50.79   |
| GAIF01025080.1 | 0       | 0       | 0       | 0.31    | 0      | 0       |
| GAIF01025081.1 | 8.01    | 29.5    | 13.85   | 15.97   | 6.39   | 9.08    |
| GAIF01025082.1 | 0.82    | 0.22    | 0.39    | 3.63    | 11.84  | 0.57    |
| GAIF01025084.1 | 3.42    | 0       | 0.08    | 3.31    | 0.35   | 2.89    |
| GAIF01025085.1 | 0       | 0.05    | 0       | 0.06    | 0      | 0       |
| GAIF01025086.1 | 0.2     | 0       | 0.15    | 0       | 0      | 0.15    |
| GAIF01025087.1 | 0.92    | 0.22    | 1.22    | 0       | 0.1    | 0.02    |



|                |         |         |        |         |         |         |
|----------------|---------|---------|--------|---------|---------|---------|
| GAIF01025088.1 | 0       | 1.22    | 0.32   | 0       | 0       | 0.13    |
| GAIF01025090.1 | 71.38   | 62.83   | 54.48  | 85.56   | 73.41   | 149.33  |
| GAIF01025091.1 | 10.53   | 16.83   | 24.59  | 1.22    | 0.58    | 0.52    |
| GAIF01025092.1 | 4.57    | 4.1     | 8.28   | 1.01    | 3.49    | 1.52    |
| GAIF01025093.1 | 0.2     | 0.18    | 0.07   | 0.03    | 0.9     | 0.04    |
| GAIF01025095.1 | 9       | 9.62    | 25.27  | 25.68   | 14.02   | 15.61   |
| GAIF01025099.1 | 63.62   | 78.25   | 50.62  | 62.52   | 1.14    | 11.43   |
| GAIF01025100.1 | 1.46    | 1.19    | 1.55   | 1.03    | 0.75    | 1.15    |
| GAIF01025101.1 | 0       | 0.18    | 0.18   | 0.19    | 0       | 0       |
| GAIF01025102.1 | 8.58    | 9.47    | 10.78  | 21.44   | 29.97   | 4.79    |
| GAIF01025103.1 | 0       | 0       | 0.03   | 0.07    | 0.04    | 0       |
| GAIF01025104.1 | 0       | 0.08    | 0      | 0.09    | 0       | 0       |
| GAIF01025105.1 | 18.93   | 25.35   | 30.95  | 51.03   | 43      | 16.98   |
| GAIF01025108.1 | 49.82   | 1.19    | 8.49   | 58.07   | 22.91   | 67.44   |
| GAIF01025109.1 | 0.11    | 0       | 0      | 0.69    | 1.77    | 0       |
| GAIF01025110.1 | 0.69    | 0.25    | 0      | 0.18    | 1.02    | 0       |
| GAIF01025111.1 | 0.15    | 0.08    | 0.08   | 0.89    | 2.24    | 0.08    |
| GAIF01025112.1 | 0       | 0       | 0      | 0.39    | 1.86    | 0.12    |
| GAIF01025113.1 | 151.49  | 178.68  | 185.67 | 245.67  | 123.57  | 73.97   |
| GAIF01025114.1 | 26.91   | 19.56   | 34.74  | 57.14   | 33.63   | 33.13   |
| GAIF01025117.1 | 0       | 0       | 0      | 0       | 0.6     | 0       |
| GAIF01025119.1 | 70.62   | 126.99  | 68.31  | 85.14   | 74.6    | 9.78    |
| GAIF01025120.1 | 0       | 0.1     | 0      | 0       | 1.02    | 0       |
| GAIF01025121.1 | 6.38    | 5.61    | 8.53   | 11.77   | 14.17   | 8.41    |
| GAIF01025122.1 | 1.1     | 0.54    | 0.22   | 11.4    | 47.35   | 1.44    |
| GAIF01025123.1 | 27.09   | 32.1    | 39.06  | 80.25   | 31.66   | 28.46   |
| GAIF01025124.1 | 58.36   | 29.61   | 15.68  | 77.24   | 36.21   | 39.94   |
| GAIF01025125.1 | 0       | 0.07    | 0      | 0       | 0       | 0       |
| GAIF01025126.1 | 0.14    | 0       | 0.3    | 7.58    | 11.62   | 0       |
| GAIF01025128.1 | 0       | 0       | 0      | 0       | 0.03    | 0       |
| GAIF01025129.1 | 0.14    | 0       | 0.03   | 0.5     | 1.93    | 0.47    |
| GAIF01025130.1 | 0.25    | 0       | 0      | 0.19    | 0.1     | 0       |
| GAIF01025131.1 | 8.91    | 6.21    | 1.43   | 32.12   | 83.29   | 29.56   |
| GAIF01025132.1 | 0       | 0       | 0      | 0.02    | 0.09    | 0       |
| GAIF01025133.1 | 0.09    | 0       | 0      | 0.52    | 3.74    | 0       |
| GAIF01025134.1 | 1.91    | 0       | 0      | 6.97    | 41.5    | 1.05    |
| GAIF01025135.1 | 0       | 0       | 0      | 0       | 0.38    | 0       |
| GAIF01025136.1 | 0       | 0       | 0      | 1.07    | 3.88    | 0.31    |
| GAIF01025137.1 | 1010.03 | 291.72  | 252.83 | 347.19  | 252.42  | 206.78  |
| GAIF01025138.1 | 1550.48 | 1495.79 | 687.65 | 5575.28 | 5291.88 | 1876.85 |
| GAIF01025140.1 | 0.12    | 0       | 0      | 0       | 0       | 0       |
| GAIF01025141.1 | 0       | 0       | 0.16   | 0.06    | 1.08    | 0       |
| GAIF01025143.1 | 0       | 0.06    | 0      | 0       | 0       | 0.03    |
| GAIF01025145.1 | 7.75    | 8.09    | 7.77   | 7.39    | 8.22    | 5.43    |

|                |        |        |        |        |       |       |
|----------------|--------|--------|--------|--------|-------|-------|
| GAIF01025146.1 | 0      | 0.12   | 0      | 0.25   | 0.6   | 0     |
| GAIF01025148.1 | 0      | 0      | 0      | 0.11   | 0     | 0.04  |
| GAIF01025150.1 | 28.5   | 36.77  | 28.41  | 48.6   | 31.82 | 9.85  |
| GAIF01025151.1 | 60.79  | 53.37  | 64.81  | 36.24  | 51.45 | 16.96 |
| GAIF01025155.1 | 0      | 0      | 0      | 0      | 1.09  | 1.16  |
| GAIF01025158.1 | 287.21 | 171.52 | 241.08 | 203.31 | 95.26 | 78.41 |
| GAIF01025159.1 | 0      | 0      | 0      | 0.13   | 0     | 0     |
| GAIF01025160.1 | 0.95   | 0.47   | 0      | 2.62   | 4.49  | 0.1   |
| GAIF01025161.1 | 13.92  | 3.77   | 3.28   | 12.19  | 11.67 | 22.69 |
| GAIF01025162.1 | 0.18   | 0.01   | 0      | 0.03   | 0.57  | 0     |
| GAIF01025163.1 | 67.26  | 43.7   | 101.21 | 52.37  | 32.69 | 26.07 |
| GAIF01025164.1 | 0.57   | 0.77   | 0      | 9.55   | 38.75 | 1.72  |
| GAIF01025166.1 | 0      | 0      | 0      | 0.62   | 1.34  | 0     |
| GAIF01025167.1 | 0.09   | 0      | 0      | 0      | 0     | 0     |
| GAIF01025168.1 | 19.96  | 12.03  | 24.06  | 43.69  | 28.31 | 38.85 |
| GAIF01025170.1 | 0.12   | 0      | 0.13   | 0.28   | 1.02  | 0     |
| GAIF01025171.1 | 0      | 0      | 0      | 0      | 0.21  | 0.19  |
| GAIF01025172.1 | 0      | 0      | 0      | 1      | 2.38  | 0.04  |
| GAIF01025173.1 | 0      | 0.18   | 0.04   | 0      | 1.6   | 0     |
| GAIF01025175.1 | 0      | 0      | 0      | 0.2    | 0     | 0     |
| GAIF01025176.1 | 1.59   | 0.12   | 0.12   | 3.33   | 9.51  | 0.31  |
| GAIF01025177.1 | 7.48   | 8.13   | 1.35   | 2.73   | 1.86  | 0     |
| GAIF01025178.1 | 1.29   | 0.9    | 0.88   | 55.91  | 53.15 | 18.68 |
| GAIF01025179.1 | 14.46  | 13.22  | 18.28  | 17.35  | 11.26 | 12.73 |
| GAIF01025180.1 | 0      | 0      | 0      | 0      | 0.31  | 0     |
| GAIF01025183.1 | 3.64   | 2.34   | 1.18   | 0.94   | 0.81  | 0     |
| GAIF01025184.1 | 0      | 0      | 0      | 0.06   | 0.25  | 0     |
| GAIF01025185.1 | 0      | 0      | 0      | 0      | 0.72  | 0     |
| GAIF01025186.1 | 0.35   | 0.22   | 0      | 0.77   | 0.58  | 0     |
| GAIF01025187.1 | 0.35   | 0      | 0      | 1.36   | 8.32  | 1.81  |
| GAIF01025188.1 | 0      | 0      | 0      | 0.04   | 0.04  | 0     |
| GAIF01025189.1 | 1.2    | 3.07   | 0.84   | 2.98   | 3.7   | 0     |
| GAIF01025191.1 | 21.03  | 18.89  | 18.49  | 35.49  | 29.1  | 21.6  |
| GAIF01025192.1 | 6.17   | 9.18   | 8.11   | 21.65  | 22.3  | 1.52  |
| GAIF01025193.1 | 5.11   | 11.06  | 8.63   | 36.1   | 22.45 | 5.47  |
| GAIF01025195.1 | 0.6    | 0.84   | 1.04   | 1.5    | 1.24  | 0.28  |
| GAIF01025196.1 | 31.21  | 81.25  | 44.89  | 70.94  | 89.4  | 9.2   |
| GAIF01025197.1 | 32.36  | 42.14  | 22.23  | 35.26  | 44.57 | 7.61  |
| GAIF01025198.1 | 0      | 0.06   | 0      | 0.07   | 0.53  | 0     |
| GAIF01025201.1 | 0      | 0.05   | 0      | 0      | 0.06  | 0     |
| GAIF01025203.1 | 12.23  | 18.06  | 20.82  | 18.26  | 12.35 | 8.61  |
| GAIF01025207.1 | 0.11   | 0.12   | 0      | 2.07   | 5.9   | 0.12  |
| GAIF01025208.1 | 0.01   | 0      | 0      | 0      | 0.73  | 0.03  |
| GAIF01025209.1 | 0      | 2.43   | 0      | 3.07   | 0     | 0     |

|                |        |        |        |        |        |        |
|----------------|--------|--------|--------|--------|--------|--------|
| GAIF01025210.1 | 310.66 | 352.29 | 860.87 | 977.58 | 475.06 | 946.05 |
| GAIF01025211.1 | 22.29  | 14.06  | 10.31  | 33.39  | 31.4   | 10.35  |
| GAIF01025212.1 | 0.18   | 0.38   | 0.05   | 0.19   | 0.1    | 0      |
| GAIF01025213.1 | 0      | 0.04   | 0      | 0.1    | 0.32   | 0      |
| GAIF01025214.1 | 0      | 0      | 0      | 0      | 0.23   | 0      |
| GAIF01025215.1 | 2.53   | 0      | 0      | 9.24   | 16.93  | 2.9    |
| GAIF01025216.1 | 0.27   | 0.27   | 0.35   | 0.34   | 0.61   | 0.14   |
| GAIF01025218.1 | 0      | 0      | 0      | 0.1    | 0.59   | 0      |
| GAIF01025220.1 | 0      | 0      | 0      | 0      | 0.77   | 0      |
| GAIF01025221.1 | 0.71   | 0.28   | 0.22   | 5.06   | 16.4   | 0.34   |
| GAIF01025222.1 | 11.18  | 5.03   | 10.34  | 20.01  | 12.1   | 19.71  |
| GAIF01025223.1 | 16.18  | 361.74 | 192.87 | 0.9    | 10.61  | 6.14   |
| GAIF01025224.1 | 0      | 0      | 0.05   | 0      | 0.05   | 0      |
| GAIF01025226.1 | 0.09   | 0.2    | 0.2    | 0.1    | 0.34   | 0      |
| GAIF01025227.1 | 0.26   | 0      | 0      | 3.32   | 15.44  | 0      |
| GAIF01025228.1 | 27.96  | 31.6   | 25.43  | 63.77  | 75.96  | 46.52  |
| GAIF01025230.1 | 6.47   | 0.09   | 0      | 1.59   | 0      | 0      |
| GAIF01025232.1 | 20.48  | 4.99   | 12.8   | 17.64  | 13.09  | 16.08  |
| GAIF01025233.1 | 11.13  | 2.63   | 4.14   | 14.97  | 19.5   | 44.08  |
| GAIF01025234.1 | 6.35   | 3.57   | 4.58   | 14.78  | 10.01  | 5.36   |
| GAIF01025235.1 | 0      | 0      | 0      | 0.4    | 2.49   | 0      |
| GAIF01025236.1 | 20.8   | 19.6   | 12.05  | 108.47 | 135.3  | 8.89   |
| GAIF01025238.1 | 0.42   | 0.21   | 0.14   | 1.31   | 10.16  | 0.71   |
| GAIF01025239.1 | 14.59  | 6.62   | 6.53   | 19.04  | 18.19  | 11.91  |
| GAIF01025240.1 | 0.42   | 0.31   | 0.62   | 0      | 0.51   | 1.86   |
| GAIF01025241.1 | 0.99   | 1.08   | 1.33   | 1.35   | 0.2    | 1.28   |
| GAIF01025242.1 | 0.81   | 0      | 0      | 4.41   | 18.35  | 4.59   |
| GAIF01025243.1 | 11.15  | 16.33  | 11.06  | 29.22  | 14.22  | 2.87   |
| GAIF01025244.1 | 1.89   | 1.28   | 0.49   | 2.97   | 15.59  | 0.41   |
| GAIF01025245.1 | 0.48   | 0.97   | 1.43   | 1.83   | 2.96   | 0.45   |
| GAIF01025247.1 | 0      | 0      | 0      | 0.7    | 2.9    | 0.11   |
| GAIF01025249.1 | 18.03  | 33.68  | 15.48  | 37.77  | 28.01  | 3.3    |
| GAIF01025251.1 | 7.44   | 2.73   | 1.79   | 19.22  | 16.81  | 4.69   |
| GAIF01025254.1 | 0.72   | 0.06   | 0      | 0.45   | 0.13   | 0      |
| GAIF01025256.1 | 0      | 0      | 0.07   | 0.24   | 1.32   | 0.49   |
| GAIF01025257.1 | 2.01   | 1.22   | 1.23   | 0      | 0      | 0.09   |
| GAIF01025259.1 | 0.88   | 0      | 0      | 0.82   | 8.69   | 8.94   |
| GAIF01025261.1 | 0.93   | 2.32   | 1.47   | 2.67   | 2.04   | 0      |
| GAIF01025262.1 | 0.03   | 0      | 0      | 0      | 0      | 0      |
| GAIF01025263.1 | 0.44   | 0      | 0      | 1.33   | 3.28   | 0.1    |
| GAIF01025264.1 | 0.37   | 0      | 0      | 0.61   | 1.19   | 0.06   |
| GAIF01025265.1 | 29.16  | 35.26  | 31.13  | 45.01  | 37.01  | 8.91   |
| GAIF01025267.1 | 0.13   | 0      | 0      | 0.29   | 3.04   | 1.39   |
| GAIF01025268.1 | 0.06   | 0.13   | 0      | 0.13   | 1.8    | 0.24   |

|                |        |        |       |        |        |         |
|----------------|--------|--------|-------|--------|--------|---------|
| GAIF01025269.1 | 0.22   | 0      | 0     | 0      | 0      | 0       |
| GAIF01025271.1 | 0.64   | 0.1    | 0.91  | 3.63   | 18.94  | 0       |
| GAIF01025272.1 | 0.03   | 0      | 0.04  | 0      | 0      | 0       |
| GAIF01025273.1 | 1.54   | 0.47   | 0     | 3.34   | 3.05   | 1.42    |
| GAIF01025274.1 | 18.93  | 18.42  | 4.6   | 51.33  | 74.83  | 3.95    |
| GAIF01025275.1 | 0      | 7.06   | 1.85  | 0      | 0      | 0.09    |
| GAIF01025277.1 | 0      | 0.07   | 0.07  | 0      | 0      | 0       |
| GAIF01025279.1 | 1.11   | 0.24   | 0.12  | 2.45   | 7.36   | 0.25    |
| GAIF01025280.1 | 3.12   | 4.28   | 4.32  | 9.53   | 6.95   | 1.66    |
| GAIF01025281.1 | 0      | 0      | 0.07  | 0.58   | 0      | 0.07    |
| GAIF01025283.1 | 25.62  | 27.56  | 28.48 | 3.32   | 2.67   | 12.44   |
| GAIF01025284.1 | 6.48   | 5.77   | 1.03  | 6.37   | 16.51  | 5.63    |
| GAIF01025285.1 | 0      | 0      | 0     | 0.05   | 0.05   | 0       |
| GAIF01025288.1 | 0.52   | 0.34   | 0     | 1.09   | 1.51   | 0       |
| GAIF01025289.1 | 26.35  | 41.3   | 59.62 | 76.53  | 36.74  | 30.46   |
| GAIF01025290.1 | 0.06   | 0      | 1.4   | 5.1    | 3.6    | 0       |
| GAIF01025292.1 | 0.11   | 0.06   | 0.06  | 0.19   | 0.49   | 0       |
| GAIF01025293.1 | 0      | 0      | 0     | 0      | 0.15   | 0       |
| GAIF01025295.1 | 345.35 | 88.59  | 84.08 | 389.58 | 401.79 | 1475.75 |
| GAIF01025296.1 | 17.36  | 10.21  | 3.51  | 0.79   | 0.82   | 0.38    |
| GAIF01025297.1 | 0      | 0      | 0     | 0.22   | 0.23   | 0       |
| GAIF01025298.1 | 0.54   | 0.2    | 0.18  | 0.54   | 0.82   | 0.05    |
| GAIF01025299.1 | 515.08 | 89.51  | 67.01 | 62.53  | 55.51  | 135.93  |
| GAIF01025301.1 | 276.75 | 92.47  | 32.76 | 122.68 | 149.96 | 193     |
| GAIF01025302.1 | 0      | 0.7    | 0.4   | 0      | 0.05   | 0.22    |
| GAIF01025303.1 | 0      | 0      | 0     | 0      | 0.37   | 0       |
| GAIF01025308.1 | 0      | 0      | 0     | 0      | 4.1    | 0.2     |
| GAIF01025309.1 | 7.62   | 6.79   | 1.93  | 27.17  | 21.36  | 1.41    |
| GAIF01025310.1 | 12.72  | 12.61  | 8.49  | 2.13   | 0.49   | 0.67    |
| GAIF01025311.1 | 22.79  | 24.89  | 20.33 | 36.5   | 30.75  | 8.32    |
| GAIF01025312.1 | 0.15   | 0      | 0.16  | 0      | 0.12   | 0       |
| GAIF01025313.1 | 0      | 0.48   | 0     | 3.58   | 11.66  | 0       |
| GAIF01025314.1 | 0.75   | 1.26   | 0.67  | 0.7    | 0      | 0       |
| GAIF01025317.1 | 146.39 | 114.39 | 39.22 | 230.68 | 248.02 | 57.8    |
| GAIF01025318.1 | 0.08   | 0      | 0     | 0      | 0      | 0.05    |
| GAIF01025320.1 | 0      | 0.07   | 0     | 0.45   | 1.64   | 0.14    |
| GAIF01025321.1 | 0      | 0.06   | 0     | 0      | 0      | 0       |
| GAIF01025323.1 | 0      | 0.1    | 0.05  | 0      | 0      | 0.05    |
| GAIF01025324.1 | 0.1    | 0.22   | 0.19  | 1.12   | 4.19   | 0       |
| GAIF01025327.1 | 0      | 0.07   | 0     | 0.23   | 0.08   | 0.07    |
| GAIF01025328.1 | 6.99   | 3.34   | 6.05  | 12.73  | 21.01  | 31.59   |
| GAIF01025329.1 | 2.62   | 1.57   | 0     | 15.03  | 28.93  | 0.41    |
| GAIF01025331.1 | 0      | 0      | 0     | 0.12   | 0.65   | 0.06    |
| GAIF01025332.1 | 0.03   | 0.04   | 0.02  | 0.18   | 0      | 0.11    |

|                |         |         |         |         |         |         |
|----------------|---------|---------|---------|---------|---------|---------|
| GAIF01025333.1 | 0.3     | 0.11    | 0.11    | 0       | 0       | 0.11    |
| GAIF01025334.1 | 0.06    | 0.12    | 0.12    | 0       | 0.2     | 0       |
| GAIF01025335.1 | 0       | 0.14    | 0       | 0       | 0       | 0       |
| GAIF01025337.1 | 15.18   | 14.76   | 14.94   | 14.14   | 10.85   | 7.9     |
| GAIF01025338.1 | 123.78  | 101.51  | 59.88   | 147.31  | 143.81  | 220.8   |
| GAIF01025339.1 | 36.78   | 24.88   | 28      | 0       | 0       | 0       |
| GAIF01025340.1 | 0.2     | 0       | 0.59    | 0       | 0.7     | 0.42    |
| GAIF01025341.1 | 0       | 0       | 0       | 0       | 0.06    | 0       |
| GAIF01025342.1 | 0       | 0       | 0       | 0       | 0       | 0.09    |
| GAIF01025343.1 | 7.34    | 6.74    | 3.93    | 16.27   | 14.34   | 5.58    |
| GAIF01025344.1 | 0       | 0       | 0       | 0.11    | 0       | 0       |
| GAIF01025345.1 | 1329.39 | 236.68  | 625.31  | 1139.77 | 707.93  | 600.28  |
| GAIF01025347.1 | 0.34    | 0       | 1.64    | 0.53    | 1.36    | 0       |
| GAIF01025349.1 | 82.53   | 45.09   | 67.99   | 80.74   | 39.21   | 268.79  |
| GAIF01025350.1 | 0.38    | 0.1     | 0.1     | 0.09    | 2.87    | 0.1     |
| GAIF01025351.1 | 0.8     | 0       | 0       | 0.46    | 0.08    | 0       |
| GAIF01025352.1 | 10.26   | 13.93   | 4.21    | 55.26   | 69.07   | 1.8     |
| GAIF01025353.1 | 0       | 0.15    | 0.04    | 0       | 0.23    | 0       |
| GAIF01025354.1 | 0       | 0.12    | 0       | 0.1     | 0.36    | 0       |
| GAIF01025355.1 | 0       | 0.04    | 0       | 0       | 0       | 0       |
| GAIF01025356.1 | 0       | 0       | 0.17    | 0       | 0.52    | 0       |
| GAIF01025357.1 | 0       | 0       | 0       | 0.25    | 1.04    | 0.12    |
| GAIF01025358.1 | 0       | 0.06    | 0       | 1.21    | 7.86    | 0       |
| GAIF01025359.1 | 0.07    | 0.4     | 0.08    | 1.5     | 4.76    | 0.56    |
| GAIF01025360.1 | 45.18   | 38.89   | 26.29   | 286.74  | 271.57  | 39.97   |
| GAIF01025361.1 | 21.95   | 16.34   | 19.47   | 34.7    | 23.81   | 72.66   |
| GAIF01025362.1 | 0.33    | 0.61    | 0.47    | 0.15    | 0.4     | 0       |
| GAIF01025363.1 | 5.82    | 1.61    | 0.5     | 46.07   | 103.27  | 1.75    |
| GAIF01025364.1 | 0       | 0       | 0       | 0.11    | 0       | 0       |
| GAIF01025365.1 | 16.32   | 14.12   | 15.3    | 20.81   | 14.76   | 7.95    |
| GAIF01025366.1 | 8032.16 | 2553.07 | 1495.39 | 4367.19 | 4247.65 | 2384.03 |
| GAIF01025368.1 | 0       | 0.5     | 0       | 0       | 0       | 0.51    |
| GAIF01025369.1 | 0       | 0       | 0       | 0.06    | 0       | 0       |
| GAIF01025370.1 | 0       | 0       | 0       | 0.1     | 0       | 0       |
| GAIF01025371.1 | 0       | 0       | 0       | 0.08    | 0.08    | 0.04    |
| GAIF01025372.1 | 0.92    | 1.61    | 1.52    | 1.78    | 1.45    | 0.94    |
| GAIF01025375.1 | 0.31    | 0       | 0.17    | 0       | 2.04    | 0.17    |
| GAIF01025376.1 | 0       | 0       | 0.14    | 0       | 0       | 0       |
| GAIF01025377.1 | 0       | 0       | 0       | 0.1     | 0.1     | 0       |
| GAIF01025378.1 | 35.88   | 31.98   | 20.1    | 50.9    | 50.43   | 17.22   |
| GAIF01025379.1 | 221.53  | 303.57  | 131.8   | 20.82   | 22.77   | 22.74   |
| GAIF01025380.1 | 0       | 0.79    | 0       | 3.11    | 8.48    | 0       |
| GAIF01025381.1 | 1555.97 | 1020.14 | 676.48  | 1900.51 | 2382.78 | 1926.7  |
| GAIF01025382.1 | 37.87   | 54.9    | 24.16   | 83.88   | 50.65   | 4.31    |

|                |        |        |        |       |       |       |
|----------------|--------|--------|--------|-------|-------|-------|
| GAIF01025383.1 | 0      | 0      | 0.04   | 0.2   | 1.16  | 0.08  |
| GAIF01025384.1 | 0.06   | 0.12   | 0      | 0.07  | 1.04  | 0     |
| GAIF01025385.1 | 32.11  | 26.23  | 24.23  | 22.28 | 23.3  | 17.34 |
| GAIF01025386.1 | 0.46   | 0.13   | 0.05   | 2.86  | 8.72  | 0.26  |
| GAIF01025387.1 | 92.98  | 106.84 | 50.67  | 39.22 | 80.89 | 6.6   |
| GAIF01025389.1 | 0.03   | 0.11   | 0.04   | 0.04  | 0.08  | 0     |
| GAIF01025390.1 | 9.67   | 6.08   | 17.55  | 18.63 | 38.64 | 70.09 |
| GAIF01025391.1 | 0.92   | 0.94   | 0      | 0.6   | 0     | 0.3   |
| GAIF01025392.1 | 17.54  | 26.91  | 18.52  | 30.66 | 34.17 | 12.72 |
| GAIF01025395.1 | 0      | 0.18   | 0      | 0.81  | 2.04  | 0     |
| GAIF01025396.1 | 4.3    | 5.38   | 5.21   | 12.13 | 0     | 21.07 |
| GAIF01025397.1 | 0.02   | 0.02   | 0      | 0.01  | 0     | 0     |
| GAIF01025398.1 | 0.52   | 0      | 0.57   | 0.48  | 0.62  | 0.11  |
| GAIF01025399.1 | 0.06   | 0.06   | 0      | 0.33  | 2.52  | 0     |
| GAIF01025400.1 | 0      | 0      | 0      | 0.08  | 0     | 0     |
| GAIF01025401.1 | 0.95   | 0      | 0.03   | 2.41  | 12.79 | 2.21  |
| GAIF01025402.1 | 0.65   | 0      | 0.26   | 0.28  | 0.14  | 0     |
| GAIF01025403.1 | 0.32   | 0      | 0      | 0.19  | 0     | 0     |
| GAIF01025404.1 | 0      | 0      | 0      | 0     | 0.24  | 0     |
| GAIF01025406.1 | 5.17   | 4.12   | 9.7    | 24.63 | 14.89 | 20.07 |
| GAIF01025408.1 | 0.17   | 0.05   | 0      | 0.4   | 0.63  | 0     |
| GAIF01025409.1 | 43.13  | 67.93  | 54.36  | 59.83 | 46    | 13.51 |
| GAIF01025410.1 | 0      | 0      | 0.04   | 0     | 2     | 0     |
| GAIF01025411.1 | 0      | 0      | 0      | 0     | 4.04  | 1.35  |
| GAIF01025413.1 | 11.23  | 3.19   | 3.86   | 18.15 | 0     | 0.6   |
| GAIF01025414.1 | 21.4   | 38.99  | 31.68  | 34.7  | 37.84 | 29.66 |
| GAIF01025415.1 | 0.21   | 0.14   | 0.17   | 0.92  | 3.52  | 0.15  |
| GAIF01025416.1 | 0.94   | 0.46   | 1.04   | 0.12  | 0     | 0.35  |
| GAIF01025417.1 | 0.75   | 0      | 0.09   | 1.36  | 5.13  | 2.03  |
| GAIF01025418.1 | 0      | 0.3    | 0      | 0     | 0     | 0.57  |
| GAIF01025419.1 | 0      | 0      | 0      | 0     | 0.27  | 0     |
| GAIF01025421.1 | 0      | 0      | 0      | 0     | 0.13  | 0     |
| GAIF01025422.1 | 20.9   | 23.14  | 19.62  | 17.83 | 30.88 | 78.88 |
| GAIF01025423.1 | 43.8   | 50.79  | 30.08  | 90.45 | 91.1  | 11.76 |
| GAIF01025424.1 | 1.33   | 1.34   | 1.38   | 6.42  | 6.45  | 2.08  |
| GAIF01025425.1 | 14.71  | 7.15   | 5.23   | 2.91  | 2.01  | 0     |
| GAIF01025426.1 | 13.97  | 20.11  | 7.3    | 48.46 | 51.46 | 3.37  |
| GAIF01025427.1 | 0.03   | 0      | 0      | 0     | 0.03  | 0     |
| GAIF01025428.1 | 0      | 0      | 0.11   | 0.11  | 0.47  | 0.22  |
| GAIF01025429.1 | 0      | 1.82   | 1.84   | 0     | 0     | 0     |
| GAIF01025431.1 | 151.72 | 238.14 | 255.68 | 26.99 | 23.22 | 42.55 |
| GAIF01025432.1 | 1.9    | 2.59   | 2.56   | 3.28  | 2.41  | 0.72  |
| GAIF01025433.1 | 0.57   | 0      | 0      | 5.53  | 20.35 | 1.92  |
| GAIF01025434.1 | 0      | 0      | 0      | 0.21  | 0     | 0     |

|                |         |          |          |         |         |         |
|----------------|---------|----------|----------|---------|---------|---------|
| GAIF01025435.1 | 35.99   | 1.77     | 0.96     | 39.35   | 101.43  | 300.49  |
| GAIF01025436.1 | 2.22    | 0.72     | 2.66     | 8.08    | 6.3     | 9.16    |
| GAIF01025437.1 | 0       | 2.95     | 2.7      | 0       | 0       | 0.27    |
| GAIF01025438.1 | 0       | 0        | 0        | 0.04    | 0.04    | 0       |
| GAIF01025440.1 | 0       | 0        | 0        | 0       | 2.37    | 0       |
| GAIF01025441.1 | 0       | 0        | 0        | 0.31    | 0.94    | 0.66    |
| GAIF01025442.1 | 0       | 0        | 0        | 0       | 0.06    | 0       |
| GAIF01025443.1 | 30.19   | 15.15    | 14.63    | 64.31   | 88.49   | 30.24   |
| GAIF01025445.1 | 0.08    | 0.44     | 0        | 1.13    | 1.75    | 0.11    |
| GAIF01025446.1 | 0       | 0        | 0        | 0.08    | 0.34    | 0       |
| GAIF01025447.1 | 0.11    | 0.59     | 0.48     | 0.88    | 2.1     | 0       |
| GAIF01025449.1 | 4471.65 | 12473.25 | 10042.73 | 4311.24 | 2417.63 | 1147.56 |
| GAIF01025450.1 | 0       | 0        | 0        | 0.2     | 0       | 0       |
| GAIF01025451.1 | 145.44  | 80.87    | 39.6     | 110.75  | 127.16  | 0.21    |
| GAIF01025452.1 | 0.16    | 0.26     | 0        | 1.21    | 7.52    | 3.27    |
| GAIF01025453.1 | 0.42    | 0        | 0.35     | 0.61    | 0.51    | 0.93    |
| GAIF01025455.1 | 0.06    | 0.03     | 0        | 0.82    | 3.19    | 0.07    |
| GAIF01025456.1 | 18.19   | 7.24     | 17.68    | 6.74    | 8.94    | 27.56   |
| GAIF01025458.1 | 0.93    | 0.97     | 0.4      | 0.76    | 0       | 0       |
| GAIF01025459.1 | 7.04    | 5.23     | 13.85    | 14.36   | 11.13   | 9.8     |
| GAIF01025460.1 | 18.6    | 9.68     | 8.48     | 32.52   | 58.59   | 17.75   |
| GAIF01025461.1 | 0.1     | 0        | 0        | 0       | 0       | 0.11    |
| GAIF01025462.1 | 10.4    | 9.67     | 9.45     | 8.13    | 2.58    | 2.39    |
| GAIF01025464.1 | 44.03   | 36.17    | 24.92    | 110.55  | 77.78   | 20.06   |
| GAIF01025466.1 | 0       | 0        | 0        | 0       | 1.06    | 0       |
| GAIF01025468.1 | 50.56   | 72.16    | 23.17    | 132.51  | 139.14  | 2.13    |
| GAIF01025470.1 | 25.59   | 16.77    | 28.33    | 31.29   | 21.07   | 102.97  |
| GAIF01025472.1 | 262.56  | 279.14   | 164.48   | 328.08  | 254.1   | 71.37   |
| GAIF01025473.1 | 0       | 0        | 0        | 0.26    | 1.22    | 0       |
| GAIF01025474.1 | 0       | 0.36     | 0.34     | 3.92    | 14.57   | 0       |
| GAIF01025477.1 | 0.32    | 0        | 0        | 0.89    | 3.93    | 0.14    |
| GAIF01025479.1 | 0.11    | 0.07     | 0.01     | 0       | 0.03    | 0       |
| GAIF01025480.1 | 0.61    | 0.44     | 0.17     | 2.99    | 3.34    | 0.11    |
| GAIF01025481.1 | 0.35    | 0.76     | 0.11     | 1.92    | 1.57    | 0.11    |
| GAIF01025483.1 | 2.86    | 0.59     | 0.4      | 3.04    | 7.75    | 15.49   |
| GAIF01025485.1 | 1.11    | 0.19     | 0.09     | 1.44    | 2.37    | 3.06    |
| GAIF01025487.1 | 0       | 0        | 0.13     | 0       | 0.98    | 0       |
| GAIF01025488.1 | 0       | 0.84     | 0.09     | 0       | 0       | 0.19    |
| GAIF01025489.1 | 70.59   | 39.35    | 23.82    | 4.21    | 2.32    | 2.18    |
| GAIF01025490.1 | 0.93    | 0.76     | 0        | 0.91    | 1.16    | 0       |
| GAIF01025491.1 | 0.21    | 0.09     | 0        | 0.37    | 1.75    | 0       |
| GAIF01025492.1 | 0       | 0.04     | 0        | 0       | 0.23    | 0       |
| GAIF01025493.1 | 0.05    | 0.06     | 0        | 0.53    | 3.1     | 0.06    |
| GAIF01025494.1 | 0       | 0.06     | 0        | 0.18    | 3.88    | 0       |

|                |       |        |       |        |        |       |
|----------------|-------|--------|-------|--------|--------|-------|
| GAIF01025496.1 | 0.16  | 0      | 0.17  | 0.43   | 0.82   | 0     |
| GAIF01025497.1 | 32.78 | 41.11  | 14.07 | 47.35  | 48.14  | 2.63  |
| GAIF01025498.1 | 0     | 0      | 0     | 0      | 3.56   | 1.39  |
| GAIF01025499.1 | 0.36  | 0.46   | 0.03  | 0.73   | 0.97   | 0.3   |
| GAIF01025501.1 | 11    | 13.41  | 23.19 | 26.31  | 24.82  | 14.69 |
| GAIF01025503.1 | 68.15 | 178.56 | 80.6  | 56.09  | 116.46 | 16.91 |
| GAIF01025504.1 | 0.17  | 0.12   | 0.06  | 0.28   | 0.34   | 0     |
| GAIF01025506.1 | 2.49  | 0      | 13.2  | 4.33   | 1.16   | 8.83  |
| GAIF01025507.1 | 0.3   | 0.07   | 0     | 0      | 0      | 0.55  |
| GAIF01025508.1 | 0     | 0      | 0     | 0.21   | 0.43   | 0.07  |
| GAIF01025509.1 | 0     | 0      | 0     | 0.08   | 0.12   | 0     |
| GAIF01025510.1 | 0     | 0.05   | 0     | 0      | 0.1    | 0     |
| GAIF01025511.1 | 0.07  | 0.08   | 0     | 0      | 0.17   | 0     |
| GAIF01025512.1 | 0     | 0      | 0     | 0.22   | 0      | 0     |
| GAIF01025513.1 | 25.58 | 19.03  | 26.91 | 121.12 | 41.62  | 17.36 |
| GAIF01025514.1 | 19.38 | 13.74  | 16.57 | 38.44  | 20.8   | 35.69 |
| GAIF01025515.1 | 0     | 0.06   | 0     | 0      | 1.26   | 0     |
| GAIF01025516.1 | 0.18  | 0      | 0     | 0.2    | 0.15   | 0.17  |
| GAIF01025517.1 | 0.15  | 0.17   | 0     | 0.45   | 0.87   | 0     |
| GAIF01025518.1 | 0.29  | 0.32   | 0.16  | 2.12   | 7.21   | 0.56  |
| GAIF01025519.1 | 68.03 | 82.85  | 52.87 | 76.9   | 108.47 | 24.09 |
| GAIF01025522.1 | 0.9   | 0      | 0     | 0      | 1.64   | 0.17  |
| GAIF01025524.1 | 65.41 | 23.18  | 65.58 | 92.18  | 55.57  | 14.42 |
| GAIF01025525.1 | 0.07  | 0.05   | 0     | 0.58   | 1.85   | 0.02  |
| GAIF01025526.1 | 0.3   | 0      | 0     | 0      | 0.24   | 1.11  |
| GAIF01025527.1 | 4.8   | 0.24   | 0     | 21.61  | 42.41  | 9.29  |
| GAIF01025529.1 | 0.21  | 0.03   | 0.03  | 0.76   | 3.05   | 0.07  |
| GAIF01025530.1 | 0     | 0      | 0     | 0.63   | 0.42   | 0.61  |
| GAIF01025531.1 | 2.69  | 0.2    | 0.41  | 12.65  | 23.65  | 68.6  |
| GAIF01025532.1 | 10.18 | 10.38  | 15.32 | 22.81  | 11.13  | 12.56 |
| GAIF01025533.1 | 0.43  | 0.29   | 0.11  | 0.66   | 0.36   | 0     |
| GAIF01025535.1 | 1.02  | 0.42   | 0.96  | 0      | 0.34   | 0     |
| GAIF01025536.1 | 0     | 0.22   | 0.13  | 2.18   | 9.08   | 0.45  |
| GAIF01025539.1 | 0.29  | 0.1    | 0     | 1.85   | 4.1    | 2.11  |
| GAIF01025540.1 | 0.06  | 0.06   | 0     | 0.13   | 1.48   | 0     |
| GAIF01025541.1 | 0.51  | 2.01   | 0     | 3.46   | 5.19   | 0.11  |
| GAIF01025542.1 | 0     | 0.7    | 0.29  | 0      | 2.14   | 0.82  |
| GAIF01025544.1 | 0.11  | 0      | 0     | 0      | 0      | 0.18  |
| GAIF01025545.1 | 0.74  | 0.2    | 0     | 4.31   | 8.04   | 0.41  |
| GAIF01025546.1 | 0     | 0.07   | 0     | 0.32   | 0.12   | 0     |
| GAIF01025547.1 | 0.11  | 0.3    | 0.25  | 0      | 0.74   | 0     |
| GAIF01025548.1 | 10.1  | 13.22  | 11.44 | 31.17  | 27.15  | 2.78  |
| GAIF01025549.1 | 12.33 | 16.38  | 5.06  | 34.21  | 49.67  | 4.43  |
| GAIF01025550.1 | 0.17  | 0.06   | 0     | 0      | 0      | 0     |



|                |        |        |        |        |        |       |
|----------------|--------|--------|--------|--------|--------|-------|
| GAIF01025553.1 | 0      | 0.1    | 0      | 0.11   | 1.02   | 0     |
| GAIF01025554.1 | 0      | 0      | 0      | 0.06   | 0.07   | 0     |
| GAIF01025555.1 | 0      | 0.08   | 0.08   | 0.42   | 0.78   | 0     |
| GAIF01025556.1 | 17.6   | 14.21  | 25.59  | 31.75  | 31.96  | 35.36 |
| GAIF01025557.1 | 0      | 0      | 0      | 0      | 0.21   | 0     |
| GAIF01025558.1 | 0      | 0      | 0      | 0.99   | 0.38   | 0.23  |
| GAIF01025559.1 | 4.15   | 5.68   | 1.98   | 7.17   | 11.41  | 0.72  |
| GAIF01025561.1 | 185.52 | 153.29 | 131.04 | 296.59 | 159.11 | 91.88 |
| GAIF01025562.1 | 0.12   | 0.07   | 0      | 0.57   | 5.49   | 0     |
| GAIF01025563.1 | 1.12   | 0.69   | 0.31   | 5.4    | 23.02  | 2.22  |
| GAIF01025564.1 | 3.04   | 0      | 3.6    | 6.49   | 36.05  | 6.69  |
| GAIF01025565.1 | 17.04  | 16.16  | 6.75   | 61.47  | 62.5   | 3.61  |
| GAIF01025566.1 | 7.03   | 4.14   | 4.1    | 25.74  | 26.85  | 7.58  |
| GAIF01025567.1 | 0.56   | 0.23   | 0.06   | 1.95   | 5.67   | 0.18  |
| GAIF01025568.1 | 15.01  | 14.79  | 5.09   | 15.56  | 43.82  | 1.52  |
| GAIF01025569.1 | 0      | 0      | 0      | 0      | 0.06   | 0     |
| GAIF01025570.1 | 0.35   | 0      | 0      | 0      | 2.09   | 0.58  |
| GAIF01025571.1 | 3.44   | 0.92   | 0.29   | 19.51  | 45.42  | 2.17  |
| GAIF01025573.1 | 7.76   | 6.76   | 5.7    | 10.02  | 11.13  | 11.8  |
| GAIF01025575.1 | 34.73  | 46.13  | 23.11  | 26.64  | 53.32  | 34.3  |
| GAIF01025578.1 | 0      | 0      | 0.05   | 0      | 0.87   | 0     |
| GAIF01025579.1 | 3.28   | 4.56   | 0.6    | 5.29   | 7.67   | 0.6   |
| GAIF01025581.1 | 0      | 0      | 0      | 0      | 0.69   | 0     |
| GAIF01025582.1 | 0.65   | 0      | 0.24   | 1.5    | 8.86   | 0.41  |
| GAIF01025583.1 | 103.05 | 29.57  | 20.63  | 15.64  | 12.67  | 9.86  |
| GAIF01025585.1 | 0.68   | 0.8    | 0.7    | 6.13   | 9.14   | 1.94  |
| GAIF01025586.1 | 0      | 0.24   | 0      | 0.77   | 2.41   | 0.25  |
| GAIF01025587.1 | 2.83   | 2.31   | 0      | 3.12   | 7.83   | 0.94  |
| GAIF01025588.1 | 6.86   | 5.91   | 6.42   | 15.81  | 12.92  | 3.88  |
| GAIF01025589.1 | 16.95  | 13.03  | 13.01  | 12.13  | 4.29   | 3.09  |
| GAIF01025590.1 | 74.75  | 18.34  | 19.33  | 80.26  | 74.29  | 79.35 |
| GAIF01025591.1 | 1.49   | 0.27   | 0.09   | 4.94   | 8.55   | 0     |
| GAIF01025592.1 | 267.56 | 418.01 | 28.5   | 354.22 | 633.2  | 45.25 |
| GAIF01025594.1 | 0      | 0      | 0      | 13.11  | 0      | 0     |
| GAIF01025595.1 | 21.84  | 32.01  | 27.21  | 3.27   | 1.03   | 1.49  |
| GAIF01025596.1 | 0.05   | 0.08   | 0      | 0.84   | 0.77   | 0.19  |
| GAIF01025597.1 | 7.6    | 8.29   | 4.07   | 22.88  | 39.94  | 3.34  |
| GAIF01025598.1 | 0.89   | 1.77   | 0.13   | 3.4    | 4.87   | 0     |
| GAIF01025599.1 | 0      | 0      | 0.1    | 0      | 0.11   | 0     |
| GAIF01025600.1 | 0.62   | 0      | 0.27   | 4.03   | 0.75   | 2.46  |
| GAIF01025601.1 | 13.14  | 13.38  | 5.08   | 35.62  | 45.07  | 1.6   |
| GAIF01025602.1 | 1.35   | 1.37   | 0.99   | 5.19   | 4.89   | 0.8   |
| GAIF01025603.1 | 0.6    | 2.16   | 0      | 9.43   | 28.44  | 0     |
| GAIF01025604.1 | 0      | 1.03   | 1.22   | 0.27   | 1.72   | 0     |

|                |         |         |         |         |         |         |
|----------------|---------|---------|---------|---------|---------|---------|
| GAIF01025606.1 | 1.12    | 1.01    | 0.27    | 0.97    | 0.26    | 0.27    |
| GAIF01025607.1 | 8.73    | 17.23   | 10.56   | 10.23   | 10.01   | 2.27    |
| GAIF01025609.1 | 0.32    | 0.31    | 0.34    | 0.75    | 2.88    | 0.16    |
| GAIF01025610.1 | 8.89    | 11.28   | 12.09   | 7.13    | 4.46    | 2.1     |
| GAIF01025611.1 | 11.33   | 11.45   | 9.39    | 19.43   | 14.07   | 4.27    |
| GAIF01025613.1 | 822.03  | 1008.62 | 762.7   | 369.78  | 294.56  | 194.67  |
| GAIF01025614.1 | 0.05    | 0       | 0       | 0.24    | 1.12    | 0       |
| GAIF01025616.1 | 7.9     | 5.72    | 2.84    | 14.32   | 14.19   | 1.56    |
| GAIF01025617.1 | 82.45   | 47.4    | 23.14   | 110.49  | 90.42   | 104.66  |
| GAIF01025618.1 | 0       | 0       | 0       | 0       | 0.13    | 0       |
| GAIF01025619.1 | 0.73    | 1.09    | 0.96    | 3.92    | 1.81    | 0.05    |
| GAIF01025621.1 | 0.55    | 0       | 0.14    | 8.08    | 1.85    | 2.65    |
| GAIF01025623.1 | 61.13   | 96.48   | 278.66  | 81.6    | 62.39   | 164.64  |
| GAIF01025624.1 | 15.78   | 10.61   | 12.69   | 3.77    | 1.01    | 0.66    |
| GAIF01025627.1 | 9.61    | 8.46    | 8.94    | 6.69    | 4.86    | 3.79    |
| GAIF01025628.1 | 0       | 0.06    | 0       | 0.39    | 2.89    | 0.12    |
| GAIF01025629.1 | 55.15   | 36.23   | 37.21   | 53.89   | 94.62   | 65.44   |
| GAIF01025630.1 | 15.24   | 17.28   | 20.76   | 16.08   | 9.8     | 4.94    |
| GAIF01025632.1 | 0       | 0.26    | 0       | 0       | 0.15    | 0       |
| GAIF01025634.1 | 0.94    | 0.27    | 0       | 3.62    | 2.55    | 0.34    |
| GAIF01025636.1 | 4.81    | 7.03    | 7.55    | 14.04   | 11.74   | 3.64    |
| GAIF01025637.1 | 4602.61 | 5069.76 | 7486.76 | 2578.36 | 2038.67 | 8683.24 |
| GAIF01025638.1 | 0       | 0       | 0       | 0       | 0.16    | 0       |
| GAIF01025639.1 | 8.65    | 0       | 0.35    | 4.76    | 0.19    | 0.87    |
| GAIF01025641.1 | 9.54    | 9.03    | 16.57   | 48.39   | 23.49   | 37.02   |
| GAIF01025642.1 | 0.08    | 0.83    | 0.13    | 0.79    | 1.59    | 0.18    |
| GAIF01025643.1 | 1.29    | 0.23    | 0.09    | 2.7     | 7.59    | 8.78    |
| GAIF01025645.1 | 0.15    | 0.36    | 0.13    | 0.53    | 0.51    | 0.02    |
| GAIF01025647.1 | 4.66    | 3.1     | 0       | 7.65    | 7.99    | 0       |
| GAIF01025648.1 | 0       | 0       | 0.07    | 0.04    | 0.05    | 0       |
| GAIF01025649.1 | 8.04    | 17.43   | 10.67   | 42.63   | 17.86   | 5.04    |
| GAIF01025650.1 | 249.2   | 136.5   | 163.43  | 8.69    | 5.79    | 21.77   |
| GAIF01025651.1 | 0.14    | 0.16    | 0.13    | 0.03    | 0.03    | 0.03    |
| GAIF01025652.1 | 0.03    | 0.21    | 0.07    | 0.11    | 0.08    | 0       |
| GAIF01025654.1 | 0.57    | 0.35    | 0       | 1.1     | 0.75    | 0.97    |
| GAIF01025655.1 | 2.01    | 1.75    | 3.16    | 6.98    | 7.62    | 3.64    |
| GAIF01025657.1 | 5.07    | 13.66   | 7.38    | 19.97   | 18.42   | 0.5     |
| GAIF01025658.1 | 0       | 2.39    | 1.12    | 0       | 0.05    | 0.27    |
| GAIF01025660.1 | 0       | 0       | 0       | 0.03    | 0       | 0       |
| GAIF01025661.1 | 1.15    | 2.28    | 0.42    | 1.05    | 1.21    | 0       |
| GAIF01025662.1 | 0.62    | 0.55    | 0.23    | 4.53    | 8.59    | 0.11    |
| GAIF01025664.1 | 1.21    | 4.07    | 1.33    | 10.99   | 9.66    | 0.49    |
| GAIF01025665.1 | 30.81   | 23.1    | 77.72   | 15.2    | 6.24    | 33.07   |
| GAIF01025666.1 | 0.25    | 0.5     | 0.02    | 1.5     | 3.11    | 0       |

|                |        |        |        |        |        |        |
|----------------|--------|--------|--------|--------|--------|--------|
| GAIF01025667.1 | 0      | 0      | 0.02   | 0.01   | 0.02   | 0      |
| GAIF01025668.1 | 0.69   | 0.25   | 0      | 0.62   | 0.63   | 2.26   |
| GAIF01025670.1 | 84.62  | 101.79 | 33.49  | 189.55 | 160.04 | 65.33  |
| GAIF01025672.1 | 41.1   | 26.35  | 35.63  | 1.29   | 0.67   | 0.31   |
| GAIF01025674.1 | 0.11   | 0.24   | 0      | 0      | 0      | 0      |
| GAIF01025676.1 | 43.39  | 41.09  | 52.61  | 40.81  | 53.38  | 62.57  |
| GAIF01025677.1 | 0      | 0.15   | 0      | 0.17   | 1.46   | 0      |
| GAIF01025680.1 | 3.02   | 4.95   | 1.06   | 7.46   | 10.95  | 0.06   |
| GAIF01025681.1 | 0.07   | 0      | 0.08   | 0.43   | 0.09   | 0      |
| GAIF01025682.1 | 141.55 | 194.72 | 204.81 | 248.56 | 259.15 | 205.76 |
| GAIF01025683.1 | 0      | 0      | 0.09   | 0      | 0.18   | 0      |
| GAIF01025685.1 | 0.74   | 0.59   | 0      | 0.75   | 2.06   | 0      |
| GAIF01025687.1 | 0.13   | 0      | 0      | 0.31   | 0.97   | 0      |
| GAIF01025689.1 | 8.96   | 14.62  | 4.78   | 7.69   | 10.57  | 18.68  |
| GAIF01025691.1 | 2.31   | 0.81   | 0      | 7.95   | 27.29  | 2      |
| GAIF01025692.1 | 0.27   | 0      | 0      | 0      | 0.48   | 0      |
| GAIF01025694.1 | 1.63   | 0.14   | 0.14   | 8.75   | 33.54  | 0.42   |
| GAIF01025695.1 | 2.09   | 1.57   | 0.46   | 11.91  | 20.9   | 7.07   |
| GAIF01025696.1 | 0.6    | 0.84   | 1.42   | 1.4    | 0.42   | 0.2    |
| GAIF01025697.1 | 152.59 | 129.95 | 148.66 | 124.38 | 57.7   | 38.64  |
| GAIF01025698.1 | 0      | 0      | 0      | 0      | 0.01   | 0      |
| GAIF01025701.1 | 0.29   | 0.42   | 0.14   | 4.5    | 2.73   | 0.13   |
| GAIF01025702.1 | 0.24   | 0      | 0      | 1.11   | 2.89   | 0.2    |
| GAIF01025703.1 | 0.85   | 0.09   | 0.18   | 0.23   | 0.5    | 0.34   |
| GAIF01025704.1 | 0      | 0      | 0      | 0      | 0.16   | 0      |
| GAIF01025705.1 | 0      | 0.13   | 0      | 0.28   | 0.5    | 0.07   |
| GAIF01025706.1 | 0      | 0.08   | 0.08   | 2.37   | 15.06  | 0.24   |
| GAIF01025707.1 | 48.9   | 45.39  | 96.83  | 39.85  | 42.65  | 119.61 |
| GAIF01025708.1 | 0      | 0.26   | 0      | 0      | 0      | 0      |
| GAIF01025709.1 | 0      | 0.11   | 0      | 0.12   | 0      | 0      |
| GAIF01025710.1 | 0.24   | 0.05   | 0.05   | 1.47   | 7.74   | 0.86   |
| GAIF01025711.1 | 0      | 0      | 0      | 0      | 0.42   | 0      |
| GAIF01025712.1 | 0.5    | 0.12   | 0.26   | 3.71   | 7.91   | 0.64   |
| GAIF01025713.1 | 0.12   | 0.14   | 0      | 0      | 0      | 0      |
| GAIF01025714.1 | 1.88   | 1.87   | 0.34   | 4.72   | 10.53  | 1.72   |
| GAIF01025715.1 | 18.41  | 19.3   | 24     | 18.2   | 16.55  | 8.43   |
| GAIF01025716.1 | 64.22  | 69.69  | 23.05  | 310.94 | 497.01 | 6.72   |
| GAIF01025717.1 | 0      | 0      | 0.12   | 0.11   | 0.07   | 0.06   |
| GAIF01025718.1 | 0      | 0      | 0      | 0      | 0.09   | 0      |
| GAIF01025719.1 | 0.07   | 0.08   | 0      | 0      | 0.09   | 0.08   |
| GAIF01025721.1 | 1.3    | 1.3    | 2.15   | 0.13   | 0.26   | 0      |
| GAIF01025722.1 | 0      | 0      | 0      | 0      | 1.63   | 0      |
| GAIF01025723.1 | 0.11   | 0      | 0      | 0.13   | 1.17   | 0      |
| GAIF01025724.1 | 1.41   | 0      | 0      | 0.88   | 1.56   | 1.33   |

|                |        |        |         |        |        |        |
|----------------|--------|--------|---------|--------|--------|--------|
| GAIF01025725.1 | 0      | 0      | 0       | 0.87   | 1.59   | 0      |
| GAIF01025727.1 | 69.75  | 42.83  | 34.78   | 243.18 | 113.52 | 53.76  |
| GAIF01025729.1 | 0.82   | 0.41   | 0.72    | 1.19   | 0.36   | 0.27   |
| GAIF01025730.1 | 0      | 0      | 0       | 0.29   | 0.65   | 0.19   |
| GAIF01025732.1 | 0      | 0      | 0       | 0.41   | 0.46   | 0      |
| GAIF01025733.1 | 1.33   | 1.21   | 1.8     | 3.35   | 2.42   | 0.74   |
| GAIF01025735.1 | 0      | 0.33   | 0       | 0.26   | 0.85   | 0      |
| GAIF01025736.1 | 1.33   | 2.67   | 0.98    | 6.95   | 15.39  | 1.04   |
| GAIF01025737.1 | 18     | 13.56  | 7.3     | 66.78  | 51.27  | 5.64   |
| GAIF01025738.1 | 1.03   | 0      | 0       | 0.18   | 0      | 0      |
| GAIF01025739.1 | 263.08 | 113.49 | 143.98  | 172.96 | 148.27 | 507.12 |
| GAIF01025740.1 | 1.24   | 0.86   | 0.46    | 0.72   | 0.5    | 1.34   |
| GAIF01025741.1 | 0.26   | 0.83   | 0.7     | 0.3    | 0.46   | 0.28   |
| GAIF01025742.1 | 0.04   | 0.05   | 0       | 0      | 0.42   | 0      |
| GAIF01025743.1 | 16.48  | 7.01   | 12.19   | 34.72  | 24.45  | 80.85  |
| GAIF01025744.1 | 3.66   | 4.96   | 0       | 39.49  | 61.63  | 0.53   |
| GAIF01025745.1 | 55.7   | 92.88  | 101.74  | 65.04  | 49.56  | 78.67  |
| GAIF01025746.1 | 8.59   | 6.63   | 5.86    | 8.67   | 3.12   | 2.84   |
| GAIF01025747.1 | 18.75  | 21.96  | 6.33    | 78.8   | 109.8  | 4.81   |
| GAIF01025748.1 | 0      | 0      | 0       | 0.1    | 0      | 0      |
| GAIF01025750.1 | 0      | 0      | 0       | 0      | 0.17   | 0.03   |
| GAIF01025752.1 | 29.8   | 25.86  | 19.91   | 28.11  | 28.6   | 4.69   |
| GAIF01025753.1 | 0.47   | 0.11   | 0       | 0.3    | 0.26   | 0.06   |
| GAIF01025755.1 | 17.75  | 25.93  | 61.93   | 24.67  | 11.07  | 19.12  |
| GAIF01025758.1 | 27.01  | 19.33  | 17.59   | 32.57  | 32.63  | 13.66  |
| GAIF01025759.1 | 656.48 | 755.36 | 1060.78 | 139.76 | 76.05  | 49.11  |
| GAIF01025761.1 | 0      | 0      | 0       | 0.67   | 0      | 0      |
| GAIF01025764.1 | 0.1    | 0.2    | 0       | 0      | 0.34   | 0.21   |
| GAIF01025765.1 | 0.05   | 0      | 0       | 0      | 0      | 0      |
| GAIF01025766.1 | 0.11   | 0.36   | 0.61    | 0.13   | 0.13   | 0      |
| GAIF01025768.1 | 0.15   | 0.5    | 0.17    | 0.72   | 0      | 0.17   |
| GAIF01025769.1 | 0      | 0      | 0       | 0      | 0.06   | 0.12   |
| GAIF01025773.1 | 0      | 0.08   | 0.11    | 0.03   | 0      | 0      |
| GAIF01025774.1 | 0      | 0      | 0       | 0      | 1.02   | 0      |
| GAIF01025775.1 | 0      | 0.12   | 0       | 0.95   | 1.32   | 0.06   |
| GAIF01025776.1 | 6.9    | 7.67   | 10.49   | 14.06  | 13.83  | 8.53   |
| GAIF01025777.1 | 29.99  | 41.41  | 19.59   | 35.24  | 28.46  | 8.51   |
| GAIF01025781.1 | 0      | 0      | 0.17    | 0.9    | 2.43   | 0      |
| GAIF01025782.1 | 0      | 0      | 0       | 0      | 0.24   | 0      |
| GAIF01025783.1 | 5.2    | 3.72   | 2.55    | 19.84  | 38.49  | 4.52   |
| GAIF01025784.1 | 0      | 1.77   | 1.1     | 0      | 0.07   | 0.76   |
| GAIF01025785.1 | 1.83   | 1.18   | 0.57    | 1.47   | 3.9    | 0.26   |
| GAIF01025786.1 | 1.23   | 2.52   | 0.45    | 0.47   | 0.82   | 0.08   |
| GAIF01025787.1 | 0      | 0      | 0       | 0.26   | 1.8    | 0.06   |

|                |         |         |         |         |        |         |
|----------------|---------|---------|---------|---------|--------|---------|
| GAIF01025789.1 | 0       | 0       | 0       | 0.07    | 0      | 0       |
| GAIF01025790.1 | 0       | 0       | 0       | 0.09    | 0.36   | 0.08    |
| GAIF01025791.1 | 0.8     | 0.27    | 0.47    | 0.5     | 0.37   | 0.95    |
| GAIF01025794.1 | 0       | 0       | 0       | 0       | 0.01   | 0       |
| GAIF01025795.1 | 0.5     | 0.34    | 0.34    | 0.14    | 0      | 0.21    |
| GAIF01025797.1 | 0.72    | 0.68    | 0       | 0.81    | 1.79   | 1.59    |
| GAIF01025798.1 | 6.66    | 0.55    | 0.61    | 16.53   | 0.34   | 0.31    |
| GAIF01025800.1 | 0       | 0       | 0.02    | 0       | 0      | 0.05    |
| GAIF01025802.1 | 123.89  | 68.79   | 67.61   | 34.08   | 0      | 0       |
| GAIF01025803.1 | 0       | 0       | 0       | 0.27    | 0.19   | 0.09    |
| GAIF01025804.1 | 0.8     | 0.12    | 0       | 4.55    | 17.35  | 0.63    |
| GAIF01025806.1 | 0.03    | 0.21    | 0.05    | 0.97    | 8.63   | 0.07    |
| GAIF01025808.1 | 0       | 0       | 0       | 0       | 0      | 0.02    |
| GAIF01025809.1 | 0       | 0       | 0       | 0.13    | 0      | 0       |
| GAIF01025811.1 | 1.39    | 1.37    | 0       | 5.49    | 17.64  | 0.73    |
| GAIF01025812.1 | 15.01   | 7.02    | 8.97    | 21.74   | 21.22  | 29.6    |
| GAIF01025813.1 | 4.55    | 3.64    | 2.69    | 1.95    | 1.16   | 0.68    |
| GAIF01025814.1 | 0       | 0       | 0       | 0.09    | 0      | 0       |
| GAIF01025815.1 | 1.02    | 0       | 0.03    | 0.12    | 0.71   | 0       |
| GAIF01025817.1 | 0       | 0       | 0       | 0       | 0.62   | 0       |
| GAIF01025818.1 | 0       | 0       | 0       | 0       | 0.49   | 0       |
| GAIF01025819.1 | 3.25    | 1.3     | 0.97    | 0.45    | 0.32   | 0.18    |
| GAIF01025820.1 | 4410.28 | 17042.3 | 21053.5 | 4534.51 | 3980.4 | 2330.89 |
| GAIF01025821.1 | 0.45    | 0.22    | 0.67    | 0.64    | 0.64   | 0.78    |
| GAIF01025823.1 | 0       | 0.08    | 0.05    | 0.17    | 0.16   | 0       |
| GAIF01025824.1 | 0.05    | 0.05    | 0.05    | 0.9     | 3.73   | 0.8     |
| GAIF01025825.1 | 0       | 0       | 0       | 0.3     | 1.63   | 0.03    |
| GAIF01025826.1 | 7.51    | 2.14    | 14.28   | 0.19    | 0.39   | 0.72    |
| GAIF01025827.1 | 1.2     | 0.19    | 0.1     | 1.14    | 3.22   | 0.44    |
| GAIF01025829.1 | 0       | 0       | 0       | 0.46    | 0.5    | 0       |
| GAIF01025830.1 | 0       | 0       | 0       | 0       | 0.16   | 0       |
| GAIF01025831.1 | 1.72    | 1.56    | 0.47    | 1.4     | 0.59   | 0.03    |
| GAIF01025832.1 | 4.15    | 0       | 0       | 2.92    | 0      | 0       |
| GAIF01025833.1 | 21.12   | 17.24   | 25.03   | 71.11   | 39.94  | 109.73  |
| GAIF01025834.1 | 0       | 0.27    | 0.32    | 0       | 0      | 0       |
| GAIF01025836.1 | 646.33  | 583.52  | 680.99  | 311.73  | 236.49 | 320.5   |
| GAIF01025839.1 | 0.1     | 0.11    | 0       | 0.57    | 2.72   | 0       |
| GAIF01025840.1 | 16.87   | 5.8     | 12.04   | 26.68   | 28.51  | 66.88   |
| GAIF01025844.1 | 1.24    | 0.45    | 0.58    | 6.16    | 7.44   | 1.38    |
| GAIF01025845.1 | 0       | 0       | 0.07    | 0       | 0      | 0       |
| GAIF01025846.1 | 3.71    | 27.72   | 22.19   | 0.02    | 17.81  | 0       |
| GAIF01025847.1 | 0       | 0.04    | 0       | 0       | 0      | 0       |
| GAIF01025848.1 | 0       | 0.25    | 0       | 2.12    | 6.47   | 1.89    |
| GAIF01025850.1 | 0.61    | 1.34    | 0       | 0.36    | 0.37   | 0       |

|                |       |       |       |        |       |       |
|----------------|-------|-------|-------|--------|-------|-------|
| GAIF01025851.1 | 0.06  | 0.07  | 0.1   | 0.04   | 0     | 0     |
| GAIF01025852.1 | 11.8  | 10.24 | 7.34  | 29.54  | 37.1  | 3.53  |
| GAIF01025853.1 | 0     | 0     | 0     | 0.1    | 1.78  | 0.19  |
| GAIF01025854.1 | 0.12  | 0     | 0     | 0      | 0.26  | 0     |
| GAIF01025856.1 | 0     | 0.12  | 0.09  | 0      | 0     | 0     |
| GAIF01025859.1 | 0     | 1.18  | 1.88  | 0      | 0     | 0     |
| GAIF01025860.1 | 0     | 0     | 0     | 0.16   | 0.98  | 0     |
| GAIF01025861.1 | 14.11 | 13.7  | 14.48 | 36.72  | 43.92 | 11.8  |
| GAIF01025862.1 | 8.33  | 12.35 | 4.68  | 22.79  | 24.63 | 4.76  |
| GAIF01025863.1 | 8.54  | 13.03 | 11    | 5.28   | 0     | 1.35  |
| GAIF01025864.1 | 0     | 0     | 0     | 0.4    | 1.08  | 0     |
| GAIF01025865.1 | 36.05 | 9.38  | 18.22 | 107.78 | 31.5  | 6.7   |
| GAIF01025866.1 | 1.35  | 0.13  | 0     | 0.51   | 8.48  | 6.33  |
| GAIF01025869.1 | 0     | 0     | 0     | 0.83   | 0.58  | 1.66  |
| GAIF01025870.1 | 0.13  | 0     | 0     | 0.15   | 0.15  | 0     |
| GAIF01025871.1 | 52.62 | 21.95 | 4.23  | 67.78  | 85.23 | 10.5  |
| GAIF01025872.1 | 0     | 0.04  | 0.04  | 1.21   | 0.88  | 0.04  |
| GAIF01025873.1 | 0.31  | 0.45  | 0.11  | 0.48   | 0.13  | 0     |
| GAIF01025875.1 | 20.51 | 13.11 | 16.28 | 22.77  | 11.87 | 14.59 |
| GAIF01025876.1 | 0     | 0.07  | 0.1   | 0.14   | 0.5   | 0.17  |
| GAIF01025877.1 | 0     | 0     | 0     | 0      | 0.07  | 0     |
| GAIF01025878.1 | 0.09  | 0.03  | 0     | 0.26   | 2.61  | 0     |
| GAIF01025880.1 | 12.51 | 15.52 | 12.18 | 32.18  | 13.2  | 5.07  |
| GAIF01025882.1 | 0.04  | 0.04  | 0.04  | 0.27   | 1.27  | 0.28  |
| GAIF01025883.1 | 23.2  | 25.38 | 35.08 | 38.6   | 20.88 | 40.2  |
| GAIF01025885.1 | 47.6  | 62.98 | 70.37 | 122.76 | 79.81 | 38.58 |
| GAIF01025886.1 | 0.28  | 0.18  | 0.03  | 2.13   | 9.36  | 0.12  |
| GAIF01025887.1 | 0.53  | 0     | 0.32  | 0      | 0     | 0     |
| GAIF01025888.1 | 0.57  | 0.62  | 0     | 4.07   | 19.97 | 0.69  |
| GAIF01025889.1 | 0.18  | 0.05  | 0     | 1.43   | 5.96  | 0     |
| GAIF01025890.1 | 18.08 | 14.02 | 15.12 | 51     | 45.11 | 19.19 |
| GAIF01025891.1 | 0.79  | 0.88  | 0.77  | 0.3    | 0.87  | 0.2   |
| GAIF01025892.1 | 2.7   | 1.32  | 4.07  | 1.17   | 0.24  | 2.16  |
| GAIF01025893.1 | 18.88 | 20    | 23.3  | 47.94  | 36.35 | 24.05 |
| GAIF01025894.1 | 0.12  | 0.11  | 0.04  | 0.85   | 3.24  | 0.09  |
| GAIF01025895.1 | 0.03  | 0.04  | 0.04  | 0.61   | 1.84  | 1.31  |
| GAIF01025898.1 | 0.04  | 0.02  | 0     | 0.41   | 0.22  | 0.24  |
| GAIF01025899.1 | 0.04  | 0.09  | 0     | 0      | 0.05  | 0     |
| GAIF01025901.1 | 0.11  | 0     | 0     | 0      | 0     | 0     |
| GAIF01025902.1 | 41.21 | 48.86 | 50.04 | 71.23  | 33.51 | 14.01 |
| GAIF01025903.1 | 0.66  | 1.23  | 0.67  | 2.73   | 7.87  | 0     |
| GAIF01025904.1 | 0     | 0     | 0     | 0      | 0.08  | 0     |
| GAIF01025905.1 | 2.22  | 1.01  | 0.13  | 6.36   | 16.7  | 13.89 |
| GAIF01025906.1 | 24.74 | 37.41 | 13.26 | 28.2   | 16.17 | 0.97  |

|                |         |         |         |         |        |         |
|----------------|---------|---------|---------|---------|--------|---------|
| GAIF01025907.1 | 1.24    | 0.71    | 0.58    | 8.72    | 29.17  | 0.39    |
| GAIF01025908.1 | 10.56   | 14      | 3.49    | 22.5    | 44.02  | 40.82   |
| GAIF01025909.1 | 38.46   | 26.86   | 57.15   | 114.3   | 50.01  | 187.96  |
| GAIF01025911.1 | 167.95  | 121.28  | 144.9   | 64.55   | 20.8   | 33.33   |
| GAIF01025912.1 | 0       | 0.26    | 0       | 0.84    | 2.04   | 0       |
| GAIF01025913.1 | 0       | 0       | 0       | 0       | 0.15   | 0       |
| GAIF01025914.1 | 1.6     | 0.69    | 0.88    | 3.21    | 0.92   | 0.37    |
| GAIF01025915.1 | 0.04    | 0.02    | 0       | 0.04    | 0.04   | 0       |
| GAIF01025916.1 | 0       | 0       | 0.1     | 0.1     | 0.16   | 0       |
| GAIF01025917.1 | 0.2     | 0.08    | 0       | 0       | 0      | 0.12    |
| GAIF01025918.1 | 15.08   | 24.53   | 9.05    | 27.8    | 26.72  | 2.66    |
| GAIF01025919.1 | 10.06   | 11.25   | 10.94   | 2.09    | 0.34   | 0.63    |
| GAIF01025921.1 | 0       | 0.31    | 0       | 0       | 1.86   | 0       |
| GAIF01025922.1 | 14.14   | 10.62   | 6.9     | 34.92   | 14.68  | 8.53    |
| GAIF01025924.1 | 0       | 0       | 0.21    | 0.15    | 1.94   | 0.07    |
| GAIF01025926.1 | 0       | 0       | 0       | 0.04    | 0.13   | 0.04    |
| GAIF01025927.1 | 1.12    | 1.22    | 1.43    | 5.05    | 8.77   | 0.12    |
| GAIF01025929.1 | 16.71   | 19.58   | 14.91   | 45.07   | 18.44  | 5.04    |
| GAIF01025930.1 | 0.33    | 0.36    | 0       | 0.46    | 0.24   | 0       |
| GAIF01025933.1 | 1.6     | 0.43    | 0.27    | 2.67    | 3.42   | 1.27    |
| GAIF01025934.1 | 0.4     | 0.2     | 0.2     | 0.07    | 0.18   | 0       |
| GAIF01025935.1 | 1.68    | 0       | 0       | 7.41    | 13.1   | 1.21    |
| GAIF01025937.1 | 0.07    | 0.07    | 0       | 0.16    | 1.36   | 0       |
| GAIF01025940.1 | 0       | 0       | 0.12    | 0.37    | 0      | 0       |
| GAIF01025941.1 | 0.1     | 0.13    | 0.09    | 0.03    | 0.09   | 0.03    |
| GAIF01025942.1 | 7.99    | 1.62    | 4.16    | 7.74    | 4.28   | 1.99    |
| GAIF01025943.1 | 0.09    | 0.05    | 0       | 0       | 0      | 0       |
| GAIF01025944.1 | 175.69  | 221.5   | 215.64  | 141.51  | 98.61  | 83.64   |
| GAIF01025946.1 | 0.62    | 0.91    | 0.85    | 0.81    | 1.73   | 0.18    |
| GAIF01025947.1 | 1.09    | 0.59    | 0.76    | 0.85    | 2.81   | 0.46    |
| GAIF01025948.1 | 0.46    | 0       | 0.06    | 0.06    | 0.16   | 0.03    |
| GAIF01025951.1 | 0       | 0       | 0       | 0.2     | 0.2    | 0       |
| GAIF01025952.1 | 20.42   | 24.26   | 11.45   | 75.5    | 65.41  | 4.5     |
| GAIF01025953.1 | 5.93    | 5.88    | 3.95    | 35.06   | 25.15  | 5.09    |
| GAIF01025954.1 | 0       | 0       | 0       | 0.14    | 0.57   | 0       |
| GAIF01025956.1 | 0       | 0       | 0       | 0.03    | 0      | 0       |
| GAIF01025957.1 | 9.17    | 6.37    | 7.57    | 1.57    | 3.26   | 1.14    |
| GAIF01025958.1 | 14.4    | 21.12   | 15.4    | 50.53   | 58.93  | 7.78    |
| GAIF01025960.1 | 5.85    | 6.93    | 6.49    | 2.02    | 1.25   | 0.51    |
| GAIF01025961.1 | 5054.85 | 5670.63 | 7570.49 | 3049.75 | 2439.7 | 4646.57 |
| GAIF01025962.1 | 0       | 0.11    | 0       | 0       | 2.23   | 0       |
| GAIF01025963.1 | 0.65    | 1.16    | 0.69    | 1.56    | 1.79   | 0.21    |
| GAIF01025965.1 | 0       | 0.49    | 0       | 0.83    | 0.21   | 0       |
| GAIF01025966.1 | 0.05    | 0.02    | 0       | 0.09    | 0      | 0.05    |

|                |       |       |        |        |        |        |
|----------------|-------|-------|--------|--------|--------|--------|
| GAIF01025967.1 | 0.08  | 0.17  | 0.09   | 0      | 0.82   | 0      |
| GAIF01025968.1 | 0     | 0.07  | 0      | 0.08   | 0.54   | 0      |
| GAIF01025969.1 | 0     | 0     | 0      | 0      | 0.05   | 0      |
| GAIF01025970.1 | 0.05  | 0     | 0      | 0.06   | 0.71   | 0      |
| GAIF01025971.1 | 8.81  | 7.01  | 5.16   | 5.82   | 3.69   | 1.14   |
| GAIF01025973.1 | 0     | 0     | 0.03   | 0.18   | 0.42   | 0.09   |
| GAIF01025975.1 | 0     | 0.1   | 0      | 0.33   | 0.73   | 0      |
| GAIF01025977.1 | 0.11  | 0.24  | 0      | 0.13   | 1.22   | 0.12   |
| GAIF01025978.1 | 0.25  | 0.25  | 0.18   | 1.79   | 8.18   | 2.16   |
| GAIF01025979.1 | 0.44  | 0.58  | 0      | 2.47   | 4.9    | 0.1    |
| GAIF01025981.1 | 0     | 0     | 0      | 0      | 0.03   | 0.03   |
| GAIF01025982.1 | 0.6   | 0.35  | 0.18   | 0.25   | 0.85   | 0.3    |
| GAIF01025983.1 | 0.19  | 0.06  | 0.03   | 0.9    | 1.16   | 0      |
| GAIF01025984.1 | 6.36  | 10.01 | 8.18   | 48.55  | 21.97  | 9.98   |
| GAIF01025985.1 | 4.52  | 3.26  | 2.32   | 2.03   | 0.77   | 0      |
| GAIF01025987.1 | 0.09  | 0.14  | 0.18   | 0.38   | 0.24   | 0.19   |
| GAIF01025991.1 | 0     | 0     | 0      | 0      | 0.04   | 0.04   |
| GAIF01025994.1 | 0.28  | 0.15  | 0.04   | 0      | 0      | 0.19   |
| GAIF01025997.1 | 0     | 8.28  | 4.16   | 5.08   | 9.22   | 1.02   |
| GAIF01025998.1 | 0     | 0     | 0      | 0.08   | 0.37   | 0      |
| GAIF01026000.1 | 0     | 0     | 0      | 0      | 0.29   | 0      |
| GAIF01026002.1 | 0.71  | 1.25  | 1.9    | 1.03   | 3.51   | 1.36   |
| GAIF01026003.1 | 30.06 | 18.69 | 21.9   | 34.96  | 28.19  | 7.47   |
| GAIF01026004.1 | 0.4   | 0.14  | 0      | 0.7    | 0.69   | 0.6    |
| GAIF01026007.1 | 0     | 0.01  | 0      | 0      | 0      | 0      |
| GAIF01026008.1 | 0     | 0     | 0      | 0      | 0.5    | 0      |
| GAIF01026009.1 | 0     | 0.24  | 0.24   | 0      | 0      | 0.12   |
| GAIF01026011.1 | 0     | 0.07  | 0      | 0      | 0.04   | 0      |
| GAIF01026012.1 | 54.41 | 43.79 | 104.23 | 160.93 | 157.43 | 588.86 |
| GAIF01026013.1 | 0.1   | 16.18 | 16.68  | 0      | 0.5    | 1.37   |
| GAIF01026014.1 | 0     | 0     | 0      | 0.1    | 0.63   | 0      |
| GAIF01026015.1 | 0.54  | 0.47  | 0.35   | 1.62   | 1.42   | 0.24   |
| GAIF01026017.1 | 7.62  | 7.56  | 6.23   | 8.61   | 7.57   | 3.89   |
| GAIF01026018.1 | 0.44  | 0     | 0      | 0.85   | 2.83   | 0.32   |
| GAIF01026019.1 | 0     | 0.08  | 0      | 0.18   | 1.19   | 0      |
| GAIF01026020.1 | 0     | 0     | 0      | 0.2    | 0.2    | 0      |
| GAIF01026021.1 | 0     | 0     | 0      | 0      | 0.21   | 0      |
| GAIF01026022.1 | 0.79  | 0.86  | 1.67   | 3.09   | 5.38   | 2.62   |
| GAIF01026023.1 | 3.75  | 4.63  | 8.03   | 7.5    | 2.96   | 4.26   |
| GAIF01026024.1 | 0.51  | 0.55  | 1.11   | 1.17   | 1.42   | 0.19   |
| GAIF01026025.1 | 0.64  | 0.43  | 0.7    | 0.11   | 0.06   | 0.05   |
| GAIF01026027.1 | 0     | 0.16  | 0      | 0.09   | 0.27   | 0      |
| GAIF01026028.1 | 0.54  | 0.07  | 0      | 0.35   | 0.44   | 0.13   |
| GAIF01026029.1 | 0     | 0     | 0      | 0.08   | 0      | 0      |



|                |         |         |         |         |        |        |
|----------------|---------|---------|---------|---------|--------|--------|
| GAIF01026031.1 | 4.77    | 6.18    | 2.45    | 24.48   | 17.9   | 1.42   |
| GAIF01026032.1 | 11.22   | 13.27   | 17.91   | 14.53   | 2.07   | 7.61   |
| GAIF01026033.1 | 2.31    | 0       | 0       | 0.67    | 0      | 0      |
| GAIF01026034.1 | 0       | 0       | 0       | 0.44    | 0.95   | 0      |
| GAIF01026035.1 | 0       | 0       | 0.18    | 0       | 0      | 0      |
| GAIF01026037.1 | 0.53    | 0.38    | 0       | 0       | 0.84   | 0.69   |
| GAIF01026038.1 | 0.3     | 0       | 0       | 0.17    | 0.54   | 0      |
| GAIF01026039.1 | 1.25    | 2.03    | 0.46    | 0.36    | 0.62   | 0.34   |
| GAIF01026040.1 | 45.83   | 58.73   | 39.81   | 107.9   | 87.36  | 11.99  |
| GAIF01026041.1 | 0       | 0       | 0       | 0.1     | 0.17   | 0      |
| GAIF01026042.1 | 5.59    | 11.46   | 2.8     | 7.6     | 4.22   | 0      |
| GAIF01026043.1 | 0.03    | 0       | 0       | 0       | 0      | 0      |
| GAIF01026044.1 | 0.18    | 0       | 0       | 0.21    | 1.1    | 0      |
| GAIF01026045.1 | 0       | 0.2     | 0       | 0       | 0      | 0      |
| GAIF01026046.1 | 0       | 0       | 0       | 0       | 0.15   | 0.14   |
| GAIF01026047.1 | 0       | 0.2     | 0       | 0       | 0      | 0      |
| GAIF01026048.1 | 21.38   | 42.09   | 22.47   | 69.3    | 90.1   | 13.78  |
| GAIF01026049.1 | 17.39   | 21.89   | 35.86   | 43.67   | 14.11  | 23.82  |
| GAIF01026050.1 | 8.87    | 18.33   | 7.69    | 45.77   | 51.73  | 2.05   |
| GAIF01026051.1 | 1.35    | 0.07    | 0       | 2.82    | 15.17  | 5.43   |
| GAIF01026052.1 | 4.3     | 1.52    | 0       | 6.37    | 17.6   | 3.18   |
| GAIF01026053.1 | 0.33    | 0       | 0.18    | 0       | 0      | 0      |
| GAIF01026054.1 | 0.09    | 0.05    | 0.05    | 1.5     | 4.62   | 0.1    |
| GAIF01026056.1 | 1722.87 | 2314.97 | 2239.59 | 1051.91 | 776.99 | 825.13 |
| GAIF01026057.1 | 0       | 0       | 0       | 0.44    | 2.12   | 0      |
| GAIF01026058.1 | 0       | 0.09    | 0       | 0       | 0      | 0      |
| GAIF01026059.1 | 0       | 0.14    | 0       | 0       | 0      | 0      |
| GAIF01026061.1 | 0.11    | 0.12    | 0       | 0.93    | 6.76   | 0.38   |
| GAIF01026062.1 | 16.57   | 9.97    | 15.3    | 81.25   | 41.45  | 20.7   |
| GAIF01026063.1 | 0.2     | 0.41    | 0.63    | 0.15    | 0.31   | 0.26   |
| GAIF01026064.1 | 1.26    | 0.85    | 0.17    | 5.2     | 5.58   | 0.95   |
| GAIF01026065.1 | 297.71  | 233.29  | 800.44  | 73.19   | 46.08  | 483.52 |
| GAIF01026067.1 | 19.34   | 53.92   | 39.57   | 52.83   | 58.6   | 45.79  |
| GAIF01026068.1 | 0.13    | 0.37    | 0.11    | 0.33    | 0.14   | 0.21   |
| GAIF01026069.1 | 0       | 0.07    | 0       | 0       | 0      | 0      |
| GAIF01026070.1 | 0       | 0       | 0       | 0.43    | 2.33   | 0      |
| GAIF01026071.1 | 0.51    | 0.55    | 0       | 0.3     | 0.46   | 0      |
| GAIF01026072.1 | 0       | 0.34    | 0.09    | 0       | 0      | 0      |
| GAIF01026073.1 | 0       | 0       | 0       | 0.2     | 0.11   | 0      |
| GAIF01026075.1 | 0.34    | 0.15    | 0.07    | 1.4     | 4.28   | 0.52   |
| GAIF01026080.1 | 0       | 0       | 0       | 0       | 0.17   | 0      |
| GAIF01026082.1 | 10.29   | 9.74    | 9.08    | 21.93   | 26.26  | 4.58   |
| GAIF01026085.1 | 0       | 0       | 0       | 0.13    | 0      | 0      |
| GAIF01026086.1 | 0       | 0       | 0.07    | 0.07    | 0.18   | 0      |

|                |         |        |        |        |        |        |
|----------------|---------|--------|--------|--------|--------|--------|
| GAIF01026090.1 | 0       | 0.05   | 0      | 0      | 0      | 0      |
| GAIF01026091.1 | 0.34    | 0.09   | 0.05   | 0.8    | 2.12   | 0.05   |
| GAIF01026092.1 | 0       | 0      | 0      | 0.09   | 0.09   | 0      |
| GAIF01026095.1 | 5.39    | 10.53  | 4.87   | 9.16   | 14.85  | 4.39   |
| GAIF01026096.1 | 102.82  | 88.99  | 159.22 | 102.11 | 102.41 | 334.29 |
| GAIF01026097.1 | 0       | 0.1    | 0      | 0.21   | 0.97   | 0      |
| GAIF01026100.1 | 0       | 0      | 0.06   | 0      | 0      | 0      |
| GAIF01026101.1 | 19.07   | 2.35   | 9.06   | 27.19  | 34.9   | 186.29 |
| GAIF01026103.1 | 0.21    | 0.11   | 0      | 0      | 0.22   | 0      |
| GAIF01026104.1 | 2.74    | 0.21   | 0.1    | 5.48   | 41.78  | 13.73  |
| GAIF01026106.1 | 0.2     | 0.42   | 0.18   | 0.34   | 0.37   | 0.28   |
| GAIF01026107.1 | 1.28    | 0.32   | 0.11   | 10.06  | 44.85  | 1.38   |
| GAIF01026108.1 | 29.64   | 26.78  | 15.46  | 100.35 | 42.9   | 8.37   |
| GAIF01026109.1 | 0.09    | 0      | 0      | 0      | 0      | 0      |
| GAIF01026110.1 | 52.97   | 52.2   | 48.3   | 53.05  | 51.45  | 62.45  |
| GAIF01026111.1 | 358.45  | 185.48 | 148.47 | 247.57 | 110.29 | 106.58 |
| GAIF01026112.1 | 0       | 0      | 0      | 0.64   | 0      | 0.3    |
| GAIF01026114.1 | 1162.84 | 631.55 | 511.27 | 751.43 | 819.1  | 771.18 |
| GAIF01026115.1 | 0.19    | 0      | 0      | 0      | 0      | 0      |
| GAIF01026116.1 | 0       | 0      | 0.09   | 0.08   | 0.58   | 0      |
| GAIF01026118.1 | 785.79  | 313.63 | 683.11 | 380.93 | 135.75 | 331.96 |
| GAIF01026119.1 | 0.28    | 0.1    | 0      | 0.86   | 1.89   | 0      |
| GAIF01026120.1 | 0.12    | 0.16   | 0      | 0.11   | 0      | 0      |
| GAIF01026121.1 | 13.41   | 17.06  | 9.91   | 14.24  | 15.87  | 1.9    |
| GAIF01026122.1 | 60.78   | 25.84  | 29.81  | 86.15  | 62.77  | 60.72  |
| GAIF01026123.1 | 1.93    | 4.29   | 2.86   | 8.16   | 10.19  | 0.64   |
| GAIF01026124.1 | 0.34    | 0      | 0      | 0.66   | 2.44   | 0      |
| GAIF01026125.1 | 0.46    | 0      | 0.13   | 0.79   | 0      | 0.13   |
| GAIF01026126.1 | 0.17    | 0.09   | 0.28   | 0      | 0      | 0      |
| GAIF01026127.1 | 0       | 0      | 0.08   | 0      | 0      | 0      |
| GAIF01026129.1 | 0.5     | 0.18   | 0.37   | 0      | 0.2    | 0.18   |
| GAIF01026131.1 | 0.15    | 0      | 0      | 1.04   | 3.34   | 0      |
| GAIF01026134.1 | 14.24   | 3.7    | 0      | 86.16  | 51.56  | 2.51   |
| GAIF01026135.1 | 27.3    | 33.3   | 19.16  | 99.46  | 47.71  | 11.37  |
| GAIF01026136.1 | 0.48    | 0.69   | 0.17   | 0      | 0.38   | 0      |
| GAIF01026137.1 | 0.46    | 0.43   | 0.07   | 3.51   | 10.68  | 0.29   |
| GAIF01026141.1 | 0.36    | 0.4    | 0      | 0      | 0.71   | 0      |
| GAIF01026142.1 | 0.05    | 0      | 0      | 0      | 0      | 0      |
| GAIF01026143.1 | 0.27    | 0.3    | 0.2    | 0      | 0.11   | 0.1    |
| GAIF01026144.1 | 29.66   | 18.91  | 16.88  | 45.89  | 24.44  | 10.49  |
| GAIF01026145.1 | 0.43    | 0      | 0.16   | 0      | 0      | 0.09   |
| GAIF01026146.1 | 32.16   | 70.28  | 16.7   | 35.65  | 59.12  | 1.59   |
| GAIF01026147.1 | 12.54   | 18.09  | 22.94  | 35.73  | 16.53  | 10.63  |
| GAIF01026148.1 | 0.13    | 0      | 0      | 0      | 0      | 0      |

|                |        |        |        |        |        |        |
|----------------|--------|--------|--------|--------|--------|--------|
| GAIF01026149.1 | 0.2    | 0      | 0      | 0      | 0      | 0      |
| GAIF01026150.1 | 0.15   | 0.09   | 0      | 0      | 0      | 0      |
| GAIF01026151.1 | 0      | 0      | 0      | 0.54   | 1.68   | 0      |
| GAIF01026152.1 | 4.24   | 7.21   | 0.61   | 3.42   | 8.3    | 0      |
| GAIF01026155.1 | 0      | 0      | 0      | 0.08   | 0      | 0      |
| GAIF01026156.1 | 1.24   | 0.84   | 0.56   | 2.49   | 5.36   | 0      |
| GAIF01026157.1 | 3.81   | 4.56   | 3.07   | 6.49   | 6.42   | 1.4    |
| GAIF01026158.1 | 0.13   | 0      | 0.43   | 0.76   | 2.6    | 0.14   |
| GAIF01026159.1 | 0      | 0      | 0      | 0      | 0.1    | 0      |
| GAIF01026160.1 | 0.25   | 0      | 0.07   | 1.32   | 4.78   | 2.16   |
| GAIF01026161.1 | 0      | 0      | 0      | 0      | 0.46   | 0      |
| GAIF01026162.1 | 84.79  | 56.04  | 51.2   | 77.87  | 76.06  | 26.2   |
| GAIF01026163.1 | 0      | 0.11   | 0      | 1.04   | 4.07   | 0.11   |
| GAIF01026164.1 | 48.79  | 61.37  | 59.79  | 61.26  | 50.99  | 35.21  |
| GAIF01026165.1 | 0      | 0.11   | 0      | 0      | 0      | 0.11   |
| GAIF01026166.1 | 42.07  | 17.62  | 28.4   | 8.07   | 3.71   | 14.34  |
| GAIF01026168.1 | 0.25   | 0      | 0      | 0      | 0      | 0      |
| GAIF01026169.1 | 41.26  | 17.4   | 20.26  | 49.52  | 66.81  | 53.97  |
| GAIF01026170.1 | 0.21   | 0      | 0      | 0      | 1.13   | 0      |
| GAIF01026171.1 | 0.76   | 0      | 0      | 0      | 1.41   | 0      |
| GAIF01026174.1 | 897.79 | 12.93  | 106.83 | 18.71  | 2.9    | 17.1   |
| GAIF01026175.1 | 0      | 0      | 0      | 0.05   | 0.11   | 0      |
| GAIF01026176.1 | 0.01   | 0      | 0      | 0.07   | 0.07   | 0      |
| GAIF01026177.1 | 5.46   | 10.32  | 1.68   | 8.06   | 16.15  | 1.9    |
| GAIF01026178.1 | 0      | 0.17   | 0      | 0.71   | 2.86   | 0.17   |
| GAIF01026180.1 | 0.8    | 1.71   | 0.68   | 4.82   | 4.96   | 0.2    |
| GAIF01026181.1 | 0.07   | 0.04   | 0.12   | 0.26   | 0.14   | 0.41   |
| GAIF01026182.1 | 4.13   | 4.01   | 2.41   | 21.28  | 15.45  | 1.28   |
| GAIF01026183.1 | 8.55   | 7.31   | 6.24   | 17.33  | 24.94  | 10.57  |
| GAIF01026184.1 | 1.11   | 1.57   | 3.68   | 1.78   | 0      | 1.93   |
| GAIF01026186.1 | 1.98   | 1.52   | 0.73   | 4.47   | 8.02   | 0      |
| GAIF01026188.1 | 0      | 0      | 0      | 0      | 0.04   | 0      |
| GAIF01026189.1 | 0      | 0      | 0      | 0.04   | 0.21   | 0      |
| GAIF01026190.1 | 0      | 0      | 0      | 0.32   | 2.43   | 0      |
| GAIF01026191.1 | 0.14   | 0      | 0      | 0      | 0      | 0.31   |
| GAIF01026192.1 | 0.24   | 0.79   | 0.8    | 4.34   | 5.37   | 0.67   |
| GAIF01026194.1 | 0      | 0      | 0      | 0.16   | 0      | 0      |
| GAIF01026195.1 | 3.74   | 1.61   | 0.82   | 16.7   | 28.29  | 0.55   |
| GAIF01026198.1 | 0.11   | 0      | 0      | 0      | 0.26   | 0      |
| GAIF01026199.1 | 915.25 | 390.16 | 215.61 | 575.19 | 492.55 | 172.47 |
| GAIF01026200.1 | 1.11   | 3.11   | 1.36   | 1.37   | 1.47   | 0.07   |
| GAIF01026202.1 | 48.27  | 52.18  | 128.27 | 17.81  | 13.49  | 57.52  |
| GAIF01026206.1 | 202.16 | 27.42  | 5.04   | 187.96 | 773.59 | 325.23 |
| GAIF01026208.1 | 2.05   | 1.91   | 0.81   | 5.62   | 8.12   | 1.94   |

|                |        |        |        |        |        |        |
|----------------|--------|--------|--------|--------|--------|--------|
| GAIF01026209.1 | 6.45   | 17.04  | 16.67  | 19.7   | 22.2   | 3.97   |
| GAIF01026210.1 | 0      | 0      | 0      | 0.39   | 2.02   | 0.18   |
| GAIF01026211.1 | 0      | 0.24   | 0      | 0.26   | 0.53   | 0      |
| GAIF01026212.1 | 0      | 0.12   | 0      | 0      | 0.13   | 0.15   |
| GAIF01026214.1 | 3.22   | 3.83   | 0      | 17.37  | 25.93  | 0.91   |
| GAIF01026215.1 | 3.9    | 2.74   | 3.45   | 3.58   | 3.4    | 10.3   |
| GAIF01026217.1 | 0      | 0.18   | 0      | 0.19   | 0.44   | 0      |
| GAIF01026218.1 | 12.69  | 25.76  | 20.96  | 27.71  | 16.43  | 6.36   |
| GAIF01026219.1 | 111.25 | 125.85 | 278.78 | 101.22 | 83.46  | 204.77 |
| GAIF01026220.1 | 229.59 | 209.79 | 93.69  | 57.37  | 47.92  | 6.23   |
| GAIF01026222.1 | 514.53 | 400.02 | 592.29 | 235.15 | 165.98 | 364.87 |
| GAIF01026223.1 | 2.22   | 0.99   | 0.14   | 1.21   | 2.67   | 2.88   |
| GAIF01026225.1 | 0.15   | 0      | 0      | 0.34   | 0.18   | 0.16   |
| GAIF01026226.1 | 0      | 2.02   | 0      | 0      | 3.37   | 0      |
| GAIF01026227.1 | 29.7   | 24.42  | 52.51  | 0      | 0.2    | 0.09   |
| GAIF01026228.1 | 0      | 0      | 0.48   | 1.19   | 10.34  | 0      |
| GAIF01026230.1 | 170.71 | 92.36  | 63.17  | 79.24  | 31.63  | 19.14  |
| GAIF01026231.1 | 0.41   | 0      | 0      | 0.67   | 1.86   | 0      |
| GAIF01026232.1 | 0      | 0      | 0      | 0.57   | 1.58   | 0      |
| GAIF01026234.1 | 1.99   | 0      | 0      | 4.35   | 0      | 0      |
| GAIF01026236.1 | 0.23   | 0.08   | 0.33   | 0      | 0.37   | 0      |
| GAIF01026237.1 | 0      | 0.05   | 0      | 0.11   | 0.5    | 0      |
| GAIF01026238.1 | 0.78   | 0.28   | 0.21   | 0.15   | 0.08   | 0      |
| GAIF01026239.1 | 0      | 0.12   | 0      | 0.91   | 3.35   | 0.49   |
| GAIF01026240.1 | 0.83   | 1.26   | 0      | 1.92   | 1.59   | 0      |
| GAIF01026241.1 | 23.18  | 26.13  | 15.3   | 39.58  | 40.2   | 4.8    |
| GAIF01026242.1 | 0.34   | 0.14   | 0      | 1.37   | 4.06   | 0.37   |
| GAIF01026244.1 | 0      | 0      | 0      | 0      | 0.38   | 0      |
| GAIF01026245.1 | 0      | 0      | 0.39   | 0.54   | 1.1    | 0.24   |
| GAIF01026249.1 | 0      | 0      | 0      | 0      | 0.88   | 0      |
| GAIF01026250.1 | 0      | 0      | 0      | 0.12   | 0      | 0      |
| GAIF01026251.1 | 5.37   | 12.74  | 18.63  | 20.47  | 14.89  | 5.59   |
| GAIF01026253.1 | 0.73   | 0.4    | 0      | 2.55   | 5.5    | 0.3    |
| GAIF01026254.1 | 0      | 1      | 0      | 0.75   | 144.17 | 0      |
| GAIF01026255.1 | 71.36  | 110.25 | 124.9  | 106.92 | 104.27 | 47.08  |
| GAIF01026256.1 | 0      | 0      | 0      | 0      | 0.03   | 0      |
| GAIF01026257.1 | 1.21   | 0.12   | 0.08   | 2.06   | 1.27   | 0.62   |
| GAIF01026258.1 | 0      | 0.21   | 0      | 0      | 0      | 0      |
| GAIF01026259.1 | 0.26   | 0.48   | 0.37   | 0.08   | 0.26   | 0.21   |
| GAIF01026260.1 | 0.51   | 0.17   | 0      | 0      | 0.32   | 0.3    |
| GAIF01026263.1 | 0      | 0      | 0      | 0.14   | 0.22   | 0      |
| GAIF01026264.1 | 4.16   | 0.87   | 2.52   | 6.87   | 1.03   | 0.6    |
| GAIF01026265.1 | 0      | 0      | 0      | 0      | 0      | 0.05   |
| GAIF01026266.1 | 54.99  | 63.07  | 77.18  | 28.2   | 21.52  | 41.79  |

|                |         |         |        |        |        |       |
|----------------|---------|---------|--------|--------|--------|-------|
| GAIF01026267.1 | 7.3     | 8.79    | 6.94   | 11.12  | 15.29  | 1.15  |
| GAIF01026268.1 | 0.04    | 0       | 0.09   | 0.15   | 0.36   | 0     |
| GAIF01026269.1 | 0.23    | 0       | 0.19   | 0.67   | 1.87   | 0.06  |
| GAIF01026272.1 | 1.5     | 1.03    | 1.15   | 2.42   | 1.1    | 0.45  |
| GAIF01026273.1 | 18.64   | 24.96   | 25.97  | 41.68  | 32.73  | 17.4  |
| GAIF01026274.1 | 13.87   | 15.21   | 15.61  | 30.6   | 8.82   | 6.82  |
| GAIF01026275.1 | 13.29   | 17.49   | 8.95   | 42.32  | 49.98  | 2.25  |
| GAIF01026276.1 | 1.5     | 1.67    | 0.82   | 9.06   | 17.99  | 0.23  |
| GAIF01026277.1 | 0.16    | 0       | 0      | 0      | 2.39   | 0     |
| GAIF01026278.1 | 0       | 0       | 0      | 0.03   | 0      | 0     |
| GAIF01026279.1 | 3.04    | 6.45    | 6.11   | 11.66  | 11.39  | 1.75  |
| GAIF01026280.1 | 16.92   | 24.58   | 13.64  | 31.43  | 24.5   | 3.22  |
| GAIF01026281.1 | 7.46    | 6.33    | 9.91   | 25.09  | 37.26  | 10.55 |
| GAIF01026282.1 | 1.05    | 1.28    | 0      | 2.9    | 1.95   | 0     |
| GAIF01026285.1 | 0.47    | 0.26    | 0.21   | 0      | 0      | 0     |
| GAIF01026286.1 | 0.75    | 0.41    | 0.07   | 1.09   | 0.53   | 0.07  |
| GAIF01026289.1 | 0       | 0.14    | 0      | 0.3    | 0.31   | 0.14  |
| GAIF01026291.1 | 10.76   | 7.54    | 11.45  | 24.53  | 31.45  | 31.17 |
| GAIF01026292.1 | 0.15    | 0.17    | 0      | 0.53   | 1.76   | 0.24  |
| GAIF01026294.1 | 0       | 0.17    | 0.7    | 0      | 0      | 0.17  |
| GAIF01026295.1 | 0.11    | 0       | 0      | 1.1    | 4.04   | 0     |
| GAIF01026296.1 | 0       | 0       | 0      | 0      | 0.34   | 0     |
| GAIF01026297.1 | 0       | 0.18    | 0.09   | 0      | 0      | 0     |
| GAIF01026298.1 | 44.4    | 16.22   | 22.7   | 20.59  | 4.24   | 6.34  |
| GAIF01026299.1 | 0.23    | 0.32    | 0      | 1.02   | 1.97   | 0     |
| GAIF01026301.1 | 0.94    | 2.91    | 1.72   | 1.95   | 0.66   | 0.32  |
| GAIF01026303.1 | 0.55    | 0.44    | 0      | 4.17   | 8.6    | 0.19  |
| GAIF01026304.1 | 0       | 0.5     | 0.34   | 0      | 0      | 0     |
| GAIF01026305.1 | 0.73    | 0       | 0      | 0.45   | 1.58   | 0.11  |
| GAIF01026307.1 | 13.81   | 13.24   | 9.67   | 25.39  | 31.37  | 23.95 |
| GAIF01026309.1 | 0       | 0       | 0      | 0      | 0.56   | 0     |
| GAIF01026311.1 | 27.57   | 18.96   | 14.89  | 36.79  | 16.08  | 6.47  |
| GAIF01026312.1 | 0       | 0.56    | 0.05   | 0      | 0      | 0     |
| GAIF01026313.1 | 0       | 0.04    | 0      | 0      | 0.29   | 0     |
| GAIF01026314.1 | 3.65    | 11.65   | 11.67  | 45.03  | 37.16  | 4.2   |
| GAIF01026315.1 | 0       | 0       | 0.18   | 0      | 0.97   | 0     |
| GAIF01026317.1 | 0       | 0       | 0      | 0.1    | 0      | 0     |
| GAIF01026318.1 | 1642.04 | 1277.73 | 1399.4 | 6.21   | 4.81   | 4.94  |
| GAIF01026319.1 | 0       | 0       | 0      | 0      | 0.15   | 0     |
| GAIF01026322.1 | 0.82    | 0.18    | 0.72   | 0.57   | 0.59   | 1.45  |
| GAIF01026325.1 | 64.75   | 36.43   | 4.82   | 124.23 | 186.71 | 41.32 |
| GAIF01026326.1 | 0       | 0       | 0      | 0      | 0.17   | 0.05  |
| GAIF01026328.1 | 0       | 2.25    | 3.55   | 5.14   | 10.82  | 2.72  |
| GAIF01026330.1 | 0       | 5.81    | 4.32   | 0      | 0.08   | 0.46  |

|                |        |       |       |        |        |       |
|----------------|--------|-------|-------|--------|--------|-------|
| GAIF01026331.1 | 124.48 | 55.08 | 37.21 | 226.7  | 216.47 | 69.78 |
| GAIF01026333.1 | 0.1    | 0.11  | 0     | 0.24   | 1.96   | 0     |
| GAIF01026334.1 | 0.18   | 0.09  | 0.23  | 0.27   | 0.29   | 0     |
| GAIF01026335.1 | 0      | 0     | 0     | 0.09   | 0      | 0     |
| GAIF01026336.1 | 0.14   | 0.22  | 0.07  | 0.95   | 1.56   | 0.08  |
| GAIF01026337.1 | 0      | 0     | 0     | 0      | 0.07   | 0     |
| GAIF01026340.1 | 0      | 0     | 0     | 0      | 1.02   | 0     |
| GAIF01026342.1 | 0.49   | 0.18  | 0.09  | 1.09   | 6.84   | 0.23  |
| GAIF01026343.1 | 0      | 0     | 0     | 0.06   | 0.06   | 0     |
| GAIF01026344.1 | 0.14   | 0.04  | 0     | 0.09   | 0.06   | 0     |
| GAIF01026345.1 | 0      | 0     | 0     | 0.56   | 4.27   | 0     |
| GAIF01026346.1 | 0      | 0     | 0     | 0.16   | 0.11   | 0     |
| GAIF01026347.1 | 0.08   | 0     | 0     | 0      | 0.03   | 0     |
| GAIF01026348.1 | 170.48 | 88.65 | 25.77 | 215.04 | 159.28 | 27.82 |
| GAIF01026349.1 | 0.1    | 0.11  | 0.65  | 0.23   | 1.78   | 4.79  |
| GAIF01026350.1 | 5.56   | 9.79  | 10.06 | 9.12   | 10.63  | 1.98  |
| GAIF01026351.1 | 21.75  | 16.15 | 19.68 | 48.87  | 51.79  | 11.61 |
| GAIF01026352.1 | 0      | 0     | 0     | 0.17   | 0.11   | 0     |
| GAIF01026353.1 | 0.32   | 0.52  | 0.35  | 0.3    | 0.23   | 0.04  |
| GAIF01026354.1 | 0      | 0     | 0     | 0.32   | 0.99   | 0     |
| GAIF01026355.1 | 1.3    | 0.14  | 0     | 3.31   | 24.32  | 0.29  |
| GAIF01026356.1 | 9.84   | 5.35  | 0.86  | 32.56  | 49.5   | 0.6   |
| GAIF01026357.1 | 0.48   | 1.54  | 0.03  | 4.75   | 11.44  | 0.13  |
| GAIF01026358.1 | 1.25   | 0     | 0     | 0.34   | 0.63   | 0     |
| GAIF01026359.1 | 0.59   | 0.38  | 0     | 3.82   | 7.91   | 0.65  |
| GAIF01026360.1 | 0      | 0     | 0     | 0      | 1.16   | 0     |
| GAIF01026361.1 | 1.6    | 0.75  | 1.23  | 5.36   | 1.47   | 1.05  |
| GAIF01026362.1 | 0.16   | 0.08  | 0     | 0.38   | 0      | 0.12  |
| GAIF01026363.1 | 8.35   | 3.71  | 5.62  | 30.82  | 26     | 2.93  |
| GAIF01026364.1 | 0.04   | 0     | 0     | 0      | 0      | 0.03  |
| GAIF01026365.1 | 17.5   | 11.67 | 13.74 | 28.47  | 20.46  | 12.27 |
| GAIF01026366.1 | 0      | 0     | 0     | 0.14   | 0      | 0     |
| GAIF01026369.1 | 28.61  | 38.29 | 54.3  | 115.95 | 86.79  | 29.13 |
| GAIF01026370.1 | 0.11   | 0.37  | 0     | 0.78   | 0.54   | 0     |
| GAIF01026371.1 | 68.23  | 41.74 | 21.11 | 60.99  | 47.85  | 39.75 |
| GAIF01026372.1 | 2.34   | 1.47  | 2.65  | 2.29   | 0.72   | 0.61  |
| GAIF01026373.1 | 1.64   | 0     | 0.16  | 4.77   | 40.52  | 16    |
| GAIF01026374.1 | 0      | 0     | 0     | 0      | 1      | 0     |
| GAIF01026375.1 | 0.13   | 0     | 0     | 0.3    | 0      | 0     |
| GAIF01026376.1 | 0.68   | 0.83  | 0.83  | 1.76   | 1.59   | 0.28  |
| GAIF01026378.1 | 0      | 0     | 0     | 0      | 4.82   | 0     |
| GAIF01026379.1 | 0      | 0     | 0     | 0      | 0.12   | 0     |
| GAIF01026381.1 | 2.38   | 0.76  | 1.08  | 6.01   | 11.28  | 0     |
| GAIF01026382.1 | 0      | 0     | 0     | 0      | 0.11   | 0     |

|                |        |        |        |        |        |         |
|----------------|--------|--------|--------|--------|--------|---------|
| GAIF01026383.1 | 0      | 0      | 0      | 0.12   | 0.25   | 0       |
| GAIF01026384.1 | 0.56   | 0      | 0.15   | 1.12   | 9.05   | 0       |
| GAIF01026385.1 | 0      | 0      | 1.05   | 1.11   | 2.3    | 0       |
| GAIF01026387.1 | 0.03   | 0      | 0      | 0.03   | 0      | 0.03    |
| GAIF01026388.1 | 837.34 | 359.55 | 331.85 | 233.87 | 192.83 | 977.23  |
| GAIF01026389.1 | 0      | 0      | 0      | 0      | 0.25   | 0       |
| GAIF01026391.1 | 0      | 0      | 0      | 0.07   | 0.17   | 0       |
| GAIF01026392.1 | 0.16   | 0.09   | 0.12   | 0.28   | 0.23   | 0.12    |
| GAIF01026393.1 | 24.96  | 27.64  | 19.68  | 39.72  | 36.95  | 7.95    |
| GAIF01026394.1 | 0      | 0      | 0      | 0.18   | 0.13   | 0       |
| GAIF01026395.1 | 0      | 0      | 0      | 0      | 0.15   | 0       |
| GAIF01026396.1 | 10.12  | 5.07   | 6.23   | 0.08   | 0      | 0       |
| GAIF01026397.1 | 0      | 0      | 0      | 0      | 0.05   | 0       |
| GAIF01026398.1 | 56.74  | 46.14  | 50.21  | 39.81  | 29.9   | 9.05    |
| GAIF01026399.1 | 0      | 0      | 0      | 0      | 0.17   | 0       |
| GAIF01026400.1 | 0      | 0      | 0      | 0      | 0      | 0.14    |
| GAIF01026401.1 | 15.77  | 23.12  | 23.34  | 32.14  | 19.15  | 8.04    |
| GAIF01026402.1 | 4.14   | 6.27   | 1.83   | 1.32   | 0.47   | 0.15    |
| GAIF01026403.1 | 0      | 0      | 0      | 0      | 0.1    | 0       |
| GAIF01026404.1 | 0      | 0      | 0      | 0.77   | 3.5    | 0       |
| GAIF01026405.1 | 0.11   | 0      | 0      | 0      | 0      | 0       |
| GAIF01026406.1 | 0.06   | 0      | 0      | 0      | 0      | 0       |
| GAIF01026408.1 | 0.05   | 0.11   | 0      | 0      | 0      | 0       |
| GAIF01026409.1 | 5.66   | 3.31   | 3.81   | 9.19   | 3.74   | 4.68    |
| GAIF01026410.1 | 0      | 0      | 0.41   | 0      | 0      | 0       |
| GAIF01026411.1 | 7.6    | 6.86   | 10.17  | 20.47  | 8.03   | 8.61    |
| GAIF01026413.1 | 0      | 0      | 0      | 0.03   | 0      | 0       |
| GAIF01026416.1 | 0      | 0.09   | 0      | 0      | 0      | 0       |
| GAIF01026419.1 | 0      | 0      | 0.13   | 0      | 0      | 0       |
| GAIF01026421.1 | 2.81   | 2.31   | 1.56   | 25.8   | 59.22  | 5.58    |
| GAIF01026422.1 | 0.14   | 0.28   | 0.8    | 0.27   | 0.1    | 0.25    |
| GAIF01026423.1 | 9.59   | 10.05  | 6.48   | 11.23  | 32.88  | 7.94    |
| GAIF01026425.1 | 1.35   | 0.62   | 0.27   | 0.67   | 1.23   | 0.72    |
| GAIF01026427.1 | 0.13   | 0.14   | 0.14   | 0      | 0.75   | 0.23    |
| GAIF01026428.1 | 0.13   | 0      | 0      | 0      | 0      | 0       |
| GAIF01026429.1 | 1.07   | 1.49   | 0      | 6.54   | 10.44  | 0.67    |
| GAIF01026431.1 | 2.86   | 6.95   | 8.97   | 0      | 0      | 3.34    |
| GAIF01026432.1 | 0.2    | 0.07   | 0.07   | 0.24   | 1.22   | 0       |
| GAIF01026433.1 | 0      | 0.12   | 0      | 0      | 0.12   | 0       |
| GAIF01026434.1 | 0      | 0      | 0.26   | 0      | 0      | 0       |
| GAIF01026435.1 | 0.01   | 0      | 0      | 0.41   | 0      | 0.31    |
| GAIF01026436.1 | 7      | 6.17   | 6.06   | 6.56   | 1.76   | 1.68    |
| GAIF01026438.1 | 14.48  | 10.75  | 11.8   | 24.17  | 16.9   | 10.38   |
| GAIF01026439.1 | 505.52 | 182.64 | 173.65 | 567.14 | 504.75 | 2185.91 |

|                |         |         |         |         |         |         |
|----------------|---------|---------|---------|---------|---------|---------|
| GAIF01026443.1 | 108.17  | 96.5    | 38.14   | 1.53    | 5.05    | 3.31    |
| GAIF01026444.1 | 0       | 0       | 0       | 0       | 0.19    | 0       |
| GAIF01026445.1 | 9.74    | 6.57    | 10.02   | 18.87   | 16.93   | 12.45   |
| GAIF01026449.1 | 0       | 0       | 0       | 0.21    | 0       | 0       |
| GAIF01026450.1 | 10.05   | 7.17    | 5.6     | 16.07   | 25      | 11.04   |
| GAIF01026451.1 | 0.78    | 0.77    | 0.07    | 1.69    | 10.27   | 1.44    |
| GAIF01026452.1 | 0.23    | 0       | 0.16    | 1.31    | 13.09   | 0       |
| GAIF01026453.1 | 2.42    | 0.22    | 2       | 16.15   | 29.01   | 1.13    |
| GAIF01026454.1 | 0.15    | 0.17    | 0       | 0.38    | 0.62    | 0.23    |
| GAIF01026455.1 | 151.65  | 201.6   | 179.68  | 0.64    | 1.49    | 1.52    |
| GAIF01026456.1 | 0       | 0.05    | 0       | 0.22    | 0.87    | 0.11    |
| GAIF01026458.1 | 1.5     | 0.13    | 0       | 8.17    | 32.89   | 4.45    |
| GAIF01026459.1 | 2.77    | 2.51    | 5.53    | 6.41    | 4.87    | 0       |
| GAIF01026460.1 | 0       | 0.33    | 0.12    | 0       | 0.23    | 0       |
| GAIF01026462.1 | 0       | 0.08    | 0.08    | 0.18    | 0.1     | 0.08    |
| GAIF01026463.1 | 6.94    | 6.5     | 17.72   | 21.77   | 19      | 19.91   |
| GAIF01026464.1 | 0       | 0       | 0       | 0.28    | 0.4     | 0.26    |
| GAIF01026465.1 | 0       | 0.02    | 0.02    | 0.27    | 2.09    | 0.02    |
| GAIF01026468.1 | 0.22    | 0.09    | 0       | 0.06    | 0.21    | 0.04    |
| GAIF01026469.1 | 17.31   | 11.73   | 1.65    | 40.48   | 31.9    | 59.71   |
| GAIF01026470.1 | 0.73    | 0.07    | 0.07    | 0.23    | 0       | 0.07    |
| GAIF01026471.1 | 0.53    | 0.16    | 0.08    | 0.62    | 2.28    | 0       |
| GAIF01026472.1 | 0.54    | 0.07    | 0.04    | 0.35    | 1.38    | 0       |
| GAIF01026473.1 | 0.28    | 0.15    | 1.24    | 0       | 0.17    | 0.31    |
| GAIF01026475.1 | 0.33    | 0.2     | 0.12    | 0.16    | 0.98    | 0       |
| GAIF01026476.1 | 0       | 0       | 0       | 0       | 0       | 0.05    |
| GAIF01026477.1 | 1.14    | 3.6     | 3.88    | 3.05    | 2.88    | 0.25    |
| GAIF01026478.1 | 0.95    | 0.65    | 0       | 6.69    | 27.73   | 1.9     |
| GAIF01026481.1 | 0       | 0       | 0       | 0       | 0.11    | 0       |
| GAIF01026482.1 | 6.61    | 8.66    | 5.36    | 11.85   | 9.21    | 1.35    |
| GAIF01026483.1 | 6.55    | 5.69    | 0.52    | 2.64    | 2.35    | 0       |
| GAIF01026484.1 | 53.86   | 53.99   | 25.7    | 126.31  | 124.07  | 16.59   |
| GAIF01026485.1 | 1.28    | 0.68    | 0.99    | 0.62    | 0.71    | 0.9     |
| GAIF01026486.1 | 25.04   | 22.14   | 3.94    | 28.18   | 34.82   | 15.27   |
| GAIF01026488.1 | 0.08    | 0       | 0.22    | 0.66    | 0.15    | 0.69    |
| GAIF01026489.1 | 424.22  | 576.74  | 567.09  | 293.53  | 181.06  | 150.35  |
| GAIF01026490.1 | 0       | 0.24    | 0       | 0       | 0.31    | 0       |
| GAIF01026492.1 | 0       | 0       | 0       | 0.11    | 0.11    | 0       |
| GAIF01026493.1 | 0       | 0       | 0       | 0       | 0.04    | 0       |
| GAIF01026494.1 | 13.61   | 8.49    | 3.6     | 17.77   | 14.99   | 4.82    |
| GAIF01026495.1 | 0.26    | 0.04    | 0.04    | 0.99    | 4.97    | 0.04    |
| GAIF01026496.1 | 0       | 0       | 0       | 0.28    | 3.51    | 0.27    |
| GAIF01026497.1 | 0       | 0       | 0.14    | 0       | 0       | 0       |
| GAIF01026500.1 | 6876.39 | 6094.17 | 7738.02 | 2036.11 | 1410.29 | 4041.88 |



|                |         |         |        |         |         |         |
|----------------|---------|---------|--------|---------|---------|---------|
| GAIF01026501.1 | 3.86    | 1.63    | 0.82   | 1.86    | 7.74    | 3.77    |
| GAIF01026502.1 | 0       | 0.05    | 0      | 0.06    | 0       | 0       |
| GAIF01026503.1 | 0       | 0       | 0.23   | 0       | 0.13    | 0       |
| GAIF01026505.1 | 0       | 0       | 0      | 0.15    | 1.08    | 0       |
| GAIF01026506.1 | 0       | 0       | 0      | 0.1     | 0.13    | 0       |
| GAIF01026508.1 | 0.11    | 0.05    | 0      | 0.76    | 0.58    | 0       |
| GAIF01026511.1 | 0.04    | 0.04    | 0      | 0.04    | 0       | 0       |
| GAIF01026514.1 | 91.54   | 52.29   | 22.49  | 144.37  | 91.08   | 5.76    |
| GAIF01026515.1 | 5090.11 | 16933.1 | 22379  | 6070.28 | 3654.15 | 2917.15 |
| GAIF01026516.1 | 0.24    | 0.26    | 0.27   | 1.97    | 9.4     | 1.12    |
| GAIF01026517.1 | 58.14   | 29.66   | 28.89  | 86.81   | 78.85   | 78.7    |
| GAIF01026518.1 | 10.81   | 11.66   | 9.8    | 1.2     | 0.62    | 1.24    |
| GAIF01026519.1 | 0.37    | 0.48    | 0.4    | 0       | 0.09    | 0       |
| GAIF01026521.1 | 2.54    | 2.27    | 1.68   | 0.53    | 0.27    | 0       |
| GAIF01026523.1 | 0       | 0       | 0      | 0       | 0       | 1.85    |
| GAIF01026525.1 | 0.67    | 0.31    | 0.14   | 0.07    | 0.19    | 0       |
| GAIF01026526.1 | 68.59   | 43.87   | 31     | 42.14   | 43.67   | 13.34   |
| GAIF01026527.1 | 1.06    | 1.11    | 0.44   | 7.25    | 19.21   | 0.2     |
| GAIF01026528.1 | 51.95   | 69.13   | 55.38  | 100.88  | 82.74   | 23.18   |
| GAIF01026530.1 | 42.46   | 25.76   | 21.52  | 113.57  | 66.68   | 19.16   |
| GAIF01026531.1 | 7.49    | 3.4     | 5.57   | 12.04   | 29.02   | 3.91    |
| GAIF01026532.1 | 37.62   | 41.29   | 87.75  | 71.41   | 28.05   | 77.5    |
| GAIF01026533.1 | 0       | 0.18    | 0.18   | 0       | 0.35    | 0       |
| GAIF01026534.1 | 0.17    | 0       | 0      | 0.6     | 5.15    | 0.11    |
| GAIF01026536.1 | 2.1     | 1.77    | 1.22   | 0.24    | 0.81    | 0.17    |
| GAIF01026537.1 | 1.37    | 2       | 0.37   | 0.67    | 4.56    | 0.64    |
| GAIF01026538.1 | 0.58    | 0.32    | 0.21   | 2.92    | 4.78    | 0       |
| GAIF01026540.1 | 0.05    | 0       | 0      | 0.06    | 0.19    | 0       |
| GAIF01026541.1 | 0.82    | 0.02    | 0.04   | 1.19    | 1.2     | 0       |
| GAIF01026542.1 | 0.35    | 0.29    | 0      | 1.64    | 7.73    | 0.68    |
| GAIF01026544.1 | 314.73  | 160.49  | 100.05 | 793.5   | 1407.12 | 1949.02 |
| GAIF01026546.1 | 25.7    | 22.77   | 19.79  | 40.19   | 46.15   | 72.65   |
| GAIF01026547.1 | 0.12    | 0.83    | 2.5    | 0.16    | 0.03    | 0.14    |
| GAIF01026550.1 | 0       | 0       | 0      | 0       | 2.67    | 0       |
| GAIF01026553.1 | 1.05    | 1.72    | 1.97   | 0.94    | 2.59    | 6.53    |
| GAIF01026556.1 | 0       | 0       | 0      | 0.3     | 0.06    | 0       |
| GAIF01026557.1 | 3.84    | 4.03    | 1.16   | 13.05   | 22.11   | 0.44    |
| GAIF01026558.1 | 43.43   | 12.23   | 15.67  | 4.49    | 3.64    | 9.73    |
| GAIF01026560.1 | 0       | 0       | 0      | 0       | 0.23    | 0       |
| GAIF01026562.1 | 0.34    | 0.28    | 0      | 1.96    | 11.69   | 0.56    |
| GAIF01026563.1 | 0       | 0.49    | 0      | 0.39    | 1.69    | 0       |
| GAIF01026564.1 | 0.21    | 3.53    | 3.92   | 6.74    | 6.54    | 2.24    |
| GAIF01026565.1 | 226.52  | 242.4   | 306.02 | 121.78  | 85.04   | 134.48  |
| GAIF01026566.1 | 0       | 0.12    | 0      | 0.53    | 0       | 0       |

|                |        |        |        |        |        |        |
|----------------|--------|--------|--------|--------|--------|--------|
| GAIF01026567.1 | 0.24   | 1.32   | 0.53   | 0.14   | 0      | 0.53   |
| GAIF01026568.1 | 0      | 1      | 0      | 2.17   | 0      | 0      |
| GAIF01026569.1 | 0.21   | 0.44   | 0.44   | 2.9    | 0.9    | 0.85   |
| GAIF01026570.1 | 0.05   | 0      | 0      | 0.33   | 0.92   | 0      |
| GAIF01026571.1 | 128.77 | 320.01 | 224.11 | 327.63 | 256.07 | 84.16  |
| GAIF01026572.1 | 3.92   | 2.1    | 5.08   | 7.69   | 12.65  | 5.02   |
| GAIF01026574.1 | 0      | 0      | 0      | 0      | 0.01   | 0      |
| GAIF01026576.1 | 104.17 | 74.76  | 69.44  | 62.17  | 38.29  | 43.16  |
| GAIF01026578.1 | 0      | 0      | 0      | 40.59  | 0      | 0      |
| GAIF01026579.1 | 0.32   | 0.41   | 0.07   | 3.45   | 14.45  | 0.07   |
| GAIF01026580.1 | 0.64   | 0.39   | 0.88   | 0.41   | 0      | 0.2    |
| GAIF01026581.1 | 0.15   | 0      | 0.08   | 0.62   | 4.51   | 0.08   |
| GAIF01026582.1 | 17.66  | 7.54   | 4.39   | 15.27  | 29.03  | 59.17  |
| GAIF01026583.1 | 0      | 0      | 0      | 0      | 0      | 0.14   |
| GAIF01026585.1 | 0      | 0.1    | 0      | 0      | 0      | 0      |
| GAIF01026586.1 | 0.07   | 0      | 0      | 0      | 0      | 0      |
| GAIF01026587.1 | 0      | 0      | 0      | 0.09   | 0.09   | 0      |
| GAIF01026589.1 | 0      | 1.69   | 1.25   | 0      | 0      | 0      |
| GAIF01026590.1 | 22.28  | 14.98  | 11.98  | 26.38  | 36.52  | 18.15  |
| GAIF01026591.1 | 0      | 1.54   | 0      | 6.58   | 5.11   | 0      |
| GAIF01026592.1 | 0      | 0      | 0      | 0.14   | 0.76   | 0      |
| GAIF01026593.1 | 0      | 0      | 0      | 0      | 0.47   | 0.22   |
| GAIF01026594.1 | 3.61   | 2.41   | 1.83   | 8.7    | 3      | 1.22   |
| GAIF01026596.1 | 2.85   | 2.75   | 0      | 0      | 0      | 0.48   |
| GAIF01026598.1 | 6.43   | 4.31   | 3.78   | 18.43  | 21.06  | 2.91   |
| GAIF01026601.1 | 11.72  | 9.95   | 12.36  | 32.24  | 9.12   | 20.74  |
| GAIF01026603.1 | 61.45  | 88.54  | 63.02  | 145.48 | 106.98 | 17.74  |
| GAIF01026604.1 | 0      | 0.25   | 0.08   | 0.18   | 0.28   | 0      |
| GAIF01026605.1 | 0      | 0      | 0      | 0      | 0.06   | 0      |
| GAIF01026606.1 | 3.17   | 0.81   | 3.39   | 0.56   | 0.68   | 0.84   |
| GAIF01026607.1 | 0      | 0.51   | 1.25   | 0.08   | 0      | 0.89   |
| GAIF01026608.1 | 0.51   | 1.6    | 0.21   | 0.15   | 0.54   | 0      |
| GAIF01026609.1 | 5.81   | 4.9    | 4.81   | 7.57   | 7.41   | 5.62   |
| GAIF01026610.1 | 0.26   | 0      | 0      | 0.3    | 3.13   | 0.14   |
| GAIF01026611.1 | 0.29   | 0      | 0      | 0      | 0      | 0.05   |
| GAIF01026612.1 | 4.65   | 2.18   | 2.24   | 10.37  | 3.8    | 4.29   |
| GAIF01026613.1 | 0      | 0      | 0      | 0.21   | 0.44   | 0      |
| GAIF01026614.1 | 0.08   | 0.18   | 0.14   | 0      | 0.05   | 0      |
| GAIF01026616.1 | 0.9    | 0.97   | 0.25   | 11.19  | 126.09 | 2.11   |
| GAIF01026617.1 | 0      | 0      | 0      | 0      | 0.03   | 0      |
| GAIF01026618.1 | 154.09 | 0.94   | 40.51  | 419.21 | 122.34 | 402.25 |
| GAIF01026619.1 | 0      | 0.02   | 0      | 0      | 0      | 0      |
| GAIF01026620.1 | 0.26   | 0      | 0      | 0      | 0.79   | 0.1    |
| GAIF01026621.1 | 0      | 0      | 0      | 0.2    | 1.43   | 0      |

|                |        |        |        |       |       |       |
|----------------|--------|--------|--------|-------|-------|-------|
| GAIF01026622.1 | 4.18   | 3.59   | 1.15   | 12.11 | 15.69 | 9.39  |
| GAIF01026623.1 | 0.48   | 0.17   | 0.07   | 3.85  | 16.21 | 0.18  |
| GAIF01026626.1 | 0      | 0.26   | 0      | 0.28  | 0     | 0     |
| GAIF01026627.1 | 11.13  | 9.25   | 8.81   | 27.21 | 28.11 | 8.31  |
| GAIF01026628.1 | 0      | 0      | 0      | 0.18  | 0.55  | 0     |
| GAIF01026629.1 | 0.11   | 0      | 0      | 0.23  | 0.58  | 0.49  |
| GAIF01026630.1 | 0      | 0      | 0      | 0     | 0.31  | 0     |
| GAIF01026632.1 | 0      | 0      | 0.07   | 0     | 0.07  | 0     |
| GAIF01026635.1 | 0      | 0.06   | 0.21   | 0     | 0     | 0.09  |
| GAIF01026636.1 | 0.03   | 0      | 0      | 0.07  | 0     | 0     |
| GAIF01026637.1 | 17.99  | 19.35  | 16.06  | 5.51  | 3.09  | 1.2   |
| GAIF01026638.1 | 0.15   | 0.03   | 0.06   | 0.26  | 1     | 0.11  |
| GAIF01026640.1 | 29.78  | 45.97  | 33.9   | 18.29 | 48.25 | 28.26 |
| GAIF01026641.1 | 2.59   | 1.79   | 3.49   | 0.27  | 0.14  | 0     |
| GAIF01026642.1 | 7.39   | 5.3    | 1.2    | 2.65  | 0.84  | 0     |
| GAIF01026643.1 | 33.91  | 34.72  | 22.37  | 48.17 | 31.01 | 3.83  |
| GAIF01026644.1 | 10.62  | 14.67  | 6.25   | 11.91 | 14.87 | 1.01  |
| GAIF01026645.1 | 0      | 0.07   | 0.15   | 0.24  | 0     | 0     |
| GAIF01026647.1 | 0.35   | 0.04   | 0.04   | 1.64  | 0.14  | 0     |
| GAIF01026649.1 | 0.19   | 0.11   | 0      | 1.15  | 6.55  | 0.24  |
| GAIF01026650.1 | 0.43   | 0      | 0      | 2.71  | 4.11  | 0     |
| GAIF01026651.1 | 15.5   | 6.71   | 4.84   | 42.95 | 73.3  | 56.06 |
| GAIF01026652.1 | 0      | 0      | 0      | 0.19  | 0.49  | 0     |
| GAIF01026653.1 | 0      | 0      | 0      | 0     | 0     | 0.06  |
| GAIF01026654.1 | 1.11   | 4.72   | 6.91   | 5.64  | 0     | 0     |
| GAIF01026655.1 | 0.12   | 0.13   | 0.09   | 1.53  | 9.27  | 0     |
| GAIF01026656.1 | 6.89   | 6.83   | 7.23   | 9.23  | 4.65  | 2.59  |
| GAIF01026657.1 | 0      | 0.04   | 0      | 0     | 0     | 0     |
| GAIF01026659.1 | 0.12   | 0.1    | 0      | 1.53  | 1.6   | 0     |
| GAIF01026660.1 | 0.06   | 0      | 0      | 0     | 0     | 0     |
| GAIF01026661.1 | 10.54  | 8.46   | 7.93   | 43.56 | 51.6  | 5.04  |
| GAIF01026665.1 | 0.09   | 0      | 0      | 0     | 0.43  | 0     |
| GAIF01026666.1 | 0.38   | 0      | 0      | 0.06  | 0.58  | 0     |
| GAIF01026667.1 | 437.04 | 426.91 | 173.83 | 15.22 | 7.49  | 1.91  |
| GAIF01026668.1 | 1.01   | 0.71   | 0      | 2.87  | 0.07  | 1.16  |
| GAIF01026672.1 | 333.35 | 272.83 | 142.75 | 209.6 | 162.7 | 83.78 |
| GAIF01026675.1 | 51.73  | 54.33  | 45.44  | 58.24 | 40.78 | 25.91 |
| GAIF01026678.1 | 0      | 0      | 0      | 0     | 0     | 0.12  |
| GAIF01026679.1 | 0.22   | 0      | 0      | 0.51  | 0.75  | 0.12  |
| GAIF01026683.1 | 0.07   | 0      | 0      | 0.37  | 0.96  | 0     |
| GAIF01026684.1 | 0      | 0      | 0      | 0     | 0.33  | 0     |
| GAIF01026686.1 | 0      | 0      | 0      | 0.08  | 0.32  | 0     |
| GAIF01026688.1 | 0.3    | 0.3    | 0.04   | 0     | 0     | 0     |
| GAIF01026689.1 | 0.06   | 0.07   | 0.07   | 0.72  | 0.97  | 0     |

|                |        |        |        |        |        |        |
|----------------|--------|--------|--------|--------|--------|--------|
| GAIF01026690.1 | 0.1    | 0      | 0.16   | 2.2    | 8.59   | 0.14   |
| GAIF01026691.1 | 2.33   | 1.74   | 1.28   | 2.03   | 5.42   | 6.89   |
| GAIF01026692.1 | 0      | 0      | 0      | 2.6    | 1.59   | 0      |
| GAIF01026694.1 | 0.03   | 0      | 0      | 0      | 0      | 0      |
| GAIF01026695.1 | 0.07   | 0      | 0      | 0      | 0      | 0      |
| GAIF01026696.1 | 17.42  | 27.36  | 37.82  | 42.68  | 25.14  | 17.49  |
| GAIF01026697.1 | 111.2  | 44.95  | 45.49  | 128.89 | 146    | 85.18  |
| GAIF01026700.1 | 0      | 0      | 0      | 0      | 0.44   | 0      |
| GAIF01026701.1 | 20.32  | 27.83  | 28.4   | 43.53  | 49.68  | 10.14  |
| GAIF01026703.1 | 0.52   | 0.07   | 0      | 1.66   | 1.57   | 0.07   |
| GAIF01026705.1 | 0      | 0.05   | 0      | 0      | 0      | 0      |
| GAIF01026706.1 | 0.71   | 0.31   | 0      | 0      | 0.17   | 0      |
| GAIF01026707.1 | 8.04   | 3.86   | 5.03   | 14.46  | 23.56  | 12.8   |
| GAIF01026708.1 | 173.72 | 195.97 | 133.35 | 142.46 | 91.09  | 15.48  |
| GAIF01026709.1 | 0.05   | 0.05   | 0.05   | 0      | 0.06   | 0.05   |
| GAIF01026710.1 | 0      | 0      | 0      | 0      | 0.06   | 0      |
| GAIF01026711.1 | 0.15   | 0.17   | 0      | 0      | 0      | 0.06   |
| GAIF01026713.1 | 9.72   | 34.03  | 29.4   | 5.74   | 10.12  | 0.51   |
| GAIF01026714.1 | 45.89  | 28.42  | 40.1   | 58.95  | 23.61  | 70.69  |
| GAIF01026716.1 | 1.87   | 0.07   | 0.08   | 6.86   | 10     | 1.44   |
| GAIF01026717.1 | 67.26  | 39.42  | 16.21  | 66.93  | 114.58 | 101.04 |
| GAIF01026718.1 | 0      | 0.2    | 0.21   | 0      | 0      | 0      |
| GAIF01026719.1 | 3.44   | 3.59   | 0.05   | 8.87   | 38.81  | 17.21  |
| GAIF01026720.1 | 0      | 0      | 0.06   | 0.07   | 0      | 0      |
| GAIF01026722.1 | 0      | 0.18   | 0.35   | 0      | 0      | 0.53   |
| GAIF01026723.1 | 3.06   | 4.52   | 2.07   | 9.99   | 14.14  | 1.76   |
| GAIF01026724.1 | 0.34   | 0      | 0      | 1.3    | 9.54   | 0.25   |
| GAIF01026726.1 | 0.85   | 0.31   | 0.1    | 0      | 0      | 0.1    |
| GAIF01026727.1 | 29.18  | 58.87  | 29.72  | 72.85  | 49.11  | 6.27   |
| GAIF01026728.1 | 6.11   | 8.48   | 7.77   | 0.16   | 0.17   | 1.49   |
| GAIF01026729.1 | 57.79  | 43.82  | 21.97  | 90.15  | 122.45 | 16.35  |
| GAIF01026730.1 | 0.07   | 0      | 0      | 0.47   | 0.32   | 0      |
| GAIF01026731.1 | 0      | 0      | 0      | 0.09   | 0      | 0      |
| GAIF01026732.1 | 10.56  | 5.08   | 5.51   | 21.51  | 30.58  | 7.54   |
| GAIF01026733.1 | 0.1    | 0.34   | 0      | 0      | 0.54   | 0      |
| GAIF01026735.1 | 0      | 0      | 0      | 0      | 0.17   | 0      |
| GAIF01026737.1 | 0.19   | 0.72   | 0.21   | 0.44   | 2.16   | 0      |
| GAIF01026738.1 | 0.2    | 0      | 0      | 1.73   | 8.39   | 0      |
| GAIF01026740.1 | 0.36   | 0.23   | 0.11   | 0.6    | 1.93   | 0.17   |
| GAIF01026741.1 | 0      | 0      | 0      | 0      | 1.7    | 1.54   |
| GAIF01026742.1 | 11.68  | 1.81   | 4.63   | 6.89   | 8.48   | 3.19   |
| GAIF01026744.1 | 0      | 1.33   | 0.19   | 0      | 0      | 0      |
| GAIF01026745.1 | 99.66  | 126.53 | 90.4   | 178.79 | 177.59 | 142.86 |
| GAIF01026746.1 | 3.47   | 3.75   | 2.33   | 6.95   | 3.82   | 0.04   |

|                |        |        |       |       |       |       |
|----------------|--------|--------|-------|-------|-------|-------|
| GAIF01026747.1 | 194.41 | 120.91 | 107.4 | 14.22 | 10.98 | 31.68 |
| GAIF01026750.1 | 0      | 0      | 0     | 0.13  | 1.01  | 0     |
| GAIF01026751.1 | 12.75  | 18.25  | 6.38  | 0.91  | 0.58  | 0.23  |
| GAIF01026752.1 | 0      | 0      | 0     | 0.02  | 0.04  | 0     |
| GAIF01026753.1 | 6.85   | 3.6    | 1.92  | 13.46 | 13.89 | 5.13  |
| GAIF01026755.1 | 27.31  | 19.35  | 18.09 | 32.46 | 25.72 | 6.62  |
| GAIF01026756.1 | 0.14   | 0      | 0     | 0.08  | 0.43  | 0.08  |
| GAIF01026758.1 | 39.61  | 34.27  | 21.55 | 51.06 | 52.55 | 54.54 |
| GAIF01026760.1 | 0.95   | 0.39   | 0.65  | 0.14  | 0.29  | 0.13  |
| GAIF01026761.1 | 0      | 0      | 0     | 0.31  | 0     | 0     |
| GAIF01026762.1 | 38.7   | 30.62  | 23.49 | 46.95 | 84.57 | 10.61 |
| GAIF01026764.1 | 0.35   | 0      | 0     | 0.21  | 4.25  | 0.78  |
| GAIF01026765.1 | 0      | 0.1    | 0.41  | 0     | 0     | 0.1   |
| GAIF01026766.1 | 0.09   | 0      | 0     | 0     | 0     | 0     |
| GAIF01026767.1 | 2      | 1.22   | 3.6   | 18.23 | 7.55  | 2.71  |
| GAIF01026768.1 | 7.09   | 1.6    | 4.56  | 2.41  | 1.35  | 2.19  |
| GAIF01026769.1 | 1.5    | 1.17   | 0.08  | 8.55  | 14.15 | 0.17  |
| GAIF01026771.1 | 0      | 0.02   | 0     | 0.02  | 0     | 0     |
| GAIF01026773.1 | 0      | 0      | 0     | 0     | 0.03  | 0     |
| GAIF01026775.1 | 0.14   | 0.01   | 0     | 0     | 0.07  | 0.04  |
| GAIF01026776.1 | 30.51  | 38.4   | 9.31  | 2.55  | 8.93  | 2.76  |
| GAIF01026777.1 | 0      | 0.04   | 0     | 0     | 0.08  | 0     |
| GAIF01026778.1 | 0      | 0.58   | 0.07  | 0     | 0.08  | 0     |
| GAIF01026779.1 | 0      | 0      | 0.03  | 0     | 5.63  | 16.43 |
| GAIF01026781.1 | 0      | 0.17   | 0.17  | 0.18  | 0     | 0     |
| GAIF01026782.1 | 12.57  | 11.8   | 6.28  | 49.04 | 49.02 | 2.24  |
| GAIF01026784.1 | 0.5    | 1.35   | 0.55  | 0     | 0.22  | 0.05  |
| GAIF01026786.1 | 0.12   | 0.04   | 0.04  | 0.27  | 0.89  | 0.17  |
| GAIF01026787.1 | 0.02   | 0      | 0     | 0.02  | 0.02  | 0     |
| GAIF01026788.1 | 0      | 0.04   | 0.26  | 0.2   | 0.5   | 0     |
| GAIF01026789.1 | 0      | 0.1    | 0     | 0     | 0     | 0     |
| GAIF01026790.1 | 0      | 0.21   | 0     | 0.33  | 1.26  | 0.1   |
| GAIF01026791.1 | 0      | 0      | 0     | 0.26  | 0     | 0     |
| GAIF01026793.1 | 1.24   | 1.76   | 0.41  | 0.58  | 1.2   | 0     |
| GAIF01026794.1 | 0.14   | 0.15   | 0     | 0.49  | 2.03  | 0     |
| GAIF01026795.1 | 0.04   | 0      | 0     | 0.54  | 1.49  | 0     |
| GAIF01026797.1 | 0.05   | 0.17   | 0.17  | 0     | 0     | 0     |
| GAIF01026798.1 | 1.58   | 0.98   | 0.12  | 6.3   | 30.89 | 0.25  |
| GAIF01026799.1 | 0.19   | 0.21   | 0     | 3.89  | 22.14 | 0.05  |
| GAIF01026800.1 | 2.67   | 3.71   | 0.61  | 3.89  | 3.81  | 0.07  |
| GAIF01026801.1 | 0.59   | 0.66   | 0.18  | 0.5   | 1.37  | 0.64  |
| GAIF01026803.1 | 0.06   | 0      | 0     | 0.07  | 0     | 0     |
| GAIF01026804.1 | 21.61  | 18.4   | 12.61 | 12.07 | 12.03 | 1.39  |
| GAIF01026805.1 | 0      | 0.15   | 0     | 1.64  | 4.77  | 0     |

|                |        |       |       |        |        |        |
|----------------|--------|-------|-------|--------|--------|--------|
| GAIF01026806.1 | 12.82  | 9.38  | 11.8  | 37.56  | 44.52  | 14.22  |
| GAIF01026807.1 | 0.03   | 0     | 0     | 0      | 0.04   | 0      |
| GAIF01026808.1 | 0      | 0     | 0.29  | 0      | 0.1    | 0.58   |
| GAIF01026809.1 | 0.12   | 0     | 0     | 2.94   | 6.79   | 0      |
| GAIF01026810.1 | 0.29   | 0.59  | 0.09  | 0.63   | 2.74   | 0.18   |
| GAIF01026811.1 | 4.81   | 5.78  | 3.43  | 18.84  | 8.98   | 2.75   |
| GAIF01026812.1 | 1.08   | 0.17  | 0     | 3.23   | 10.96  | 0.17   |
| GAIF01026815.1 | 0      | 0     | 0     | 6.92   | 15.41  | 0.29   |
| GAIF01026816.1 | 0.06   | 0.37  | 0.28  | 0.59   | 1.09   | 0      |
| GAIF01026817.1 | 0      | 0     | 0.58  | 1.13   | 0.93   | 8.62   |
| GAIF01026819.1 | 0.03   | 0     | 0     | 0.97   | 16.89  | 0      |
| GAIF01026820.1 | 22.15  | 12.46 | 8.95  | 10.51  | 4.56   | 7.21   |
| GAIF01026821.1 | 10.88  | 16.44 | 8.62  | 127.31 | 152.53 | 6.23   |
| GAIF01026822.1 | 0.13   | 0.14  | 0     | 0.15   | 1.25   | 0      |
| GAIF01026823.1 | 0.84   | 1.06  | 1.07  | 0.32   | 0.17   | 0.15   |
| GAIF01026824.1 | 9.3    | 7.58  | 10.44 | 26.15  | 26.58  | 12.03  |
| GAIF01026827.1 | 1.01   | 1.2   | 0.2   | 4.15   | 1.32   | 0.71   |
| GAIF01026828.1 | 5.2    | 9.53  | 10.43 | 18.51  | 8.57   | 3.8    |
| GAIF01026829.1 | 0      | 0.28  | 0     | 0.91   | 3.46   | 0      |
| GAIF01026830.1 | 82.8   | 47.38 | 61.44 | 45.38  | 53.09  | 62.38  |
| GAIF01026831.1 | 0.49   | 0     | 0.13  | 2.4    | 10.7   | 1.34   |
| GAIF01026832.1 | 11.64  | 3.93  | 0     | 0      | 0      | 0      |
| GAIF01026833.1 | 0      | 0     | 0     | 0      | 0.31   | 0      |
| GAIF01026834.1 | 5.82   | 7.62  | 3.91  | 5.51   | 3.14   | 0.92   |
| GAIF01026835.1 | 2.2    | 2.81  | 4.56  | 8      | 3.38   | 2.35   |
| GAIF01026836.1 | 0.07   | 0.16  | 0     | 0.08   | 0.52   | 0      |
| GAIF01026837.1 | 0.04   | 0     | 0.11  | 0.03   | 0.1    | 0      |
| GAIF01026839.1 | 142.18 | 38.62 | 50.8  | 33.07  | 30.68  | 147.29 |
| GAIF01026840.1 | 16.78  | 0     | 0     | 0      | 2.71   | 0      |
| GAIF01026841.1 | 8.71   | 6.93  | 11.12 | 22.85  | 27.26  | 11.94  |
| GAIF01026842.1 | 0.1    | 0     | 0     | 0.6    | 0.27   | 0      |
| GAIF01026844.1 | 0      | 0     | 0     | 0      | 0.08   | 0      |
| GAIF01026845.1 | 0      | 0     | 0.19  | 1.99   | 7.09   | 0      |
| GAIF01026848.1 | 0      | 0.16  | 0.32  | 0      | 0      | 0.16   |
| GAIF01026853.1 | 0      | 0     | 0     | 0      | 0.26   | 0      |
| GAIF01026855.1 | 0      | 0     | 0     | 0      | 0.9    | 0      |
| GAIF01026857.1 | 0      | 0     | 0.08  | 0      | 0.31   | 0      |
| GAIF01026858.1 | 0.45   | 1.06  | 0.49  | 0.81   | 2.54   | 0.13   |
| GAIF01026859.1 | 0.47   | 0.34  | 0     | 2.52   | 21.3   | 0.34   |
| GAIF01026860.1 | 0      | 0     | 0     | 0      | 0.72   | 0      |
| GAIF01026861.1 | 0      | 0     | 0     | 0.18   | 0      | 0      |
| GAIF01026862.1 | 4.42   | 1.89  | 0.35  | 12.27  | 46.7   | 21.83  |
| GAIF01026863.1 | 0      | 0     | 0.06  | 0      | 0      | 0      |
| GAIF01026864.1 | 5.93   | 7.9   | 1.4   | 9.37   | 9.24   | 2.85   |

|                |         |         |         |         |         |         |
|----------------|---------|---------|---------|---------|---------|---------|
| GAIF01026866.1 | 15.8    | 4.5     | 10.06   | 34.51   | 59.2    | 129.32  |
| GAIF01026868.1 | 0       | 0       | 0       | 0       | 1.26    | 0       |
| GAIF01026869.1 | 0       | 0.12    | 0.37    | 0       | 0.27    | 0       |
| GAIF01026870.1 | 0       | 0.41    | 0.21    | 0.22    | 0.92    | 0.42    |
| GAIF01026871.1 | 3404.29 | 2124.42 | 1321.34 | 2166.24 | 2672.79 | 4810.47 |
| GAIF01026873.1 | 10.16   | 13.98   | 10.11   | 30.55   | 25.8    | 4.47    |
| GAIF01026875.1 | 0.17    | 0.19    | 0       | 0.4     | 4.45    | 0       |
| GAIF01026876.1 | 0.88    | 0.48    | 0.05    | 5.09    | 13.93   | 0       |
| GAIF01026877.1 | 5.27    | 4.91    | 5.12    | 1.4     | 0.9     | 0.17    |
| GAIF01026878.1 | 0.16    | 0.11    | 0.02    | 0.31    | 0       | 0       |
| GAIF01026879.1 | 0.14    | 0       | 0.15    | 0       | 0       | 0.45    |
| GAIF01026881.1 | 0       | 0.15    | 1.22    | 0       | 0       | 2.6     |
| GAIF01026882.1 | 0.14    | 0       | 0       | 0       | 0       | 0       |
| GAIF01026884.1 | 0       | 0       | 0       | 0       | 0       | 0.18    |
| GAIF01026886.1 | 1.81    | 2.31    | 1.77    | 0.57    | 0.52    | 0       |
| GAIF01026889.1 | 0.56    | 0.12    | 0       | 1.43    | 7.15    | 0       |
| GAIF01026892.1 | 24.65   | 8.13    | 4.16    | 43.67   | 63.04   | 11.15   |
| GAIF01026893.1 | 0.92    | 0.22    | 1.63    | 0       | 0       | 0       |
| GAIF01026896.1 | 0       | 0.16    | 0       | 0.36    | 0.16    | 0       |
| GAIF01026898.1 | 0.03    | 0       | 0       | 0       | 0       | 0       |
| GAIF01026899.1 | 23.94   | 31.48   | 5.14    | 199.89  | 268.24  | 7.45    |
| GAIF01026900.1 | 969.18  | 1217.97 | 917.11  | 608.84  | 1010.51 | 5970.35 |
| GAIF01026901.1 | 2.55    | 4.08    | 3.85    | 5       | 5.37    | 0.79    |
| GAIF01026902.1 | 27.44   | 20.8    | 37.87   | 53.32   | 24.89   | 35.77   |
| GAIF01026903.1 | 77.22   | 23.85   | 13.73   | 96.04   | 44.04   | 8.09    |
| GAIF01026904.1 | 15.33   | 6.4     | 3.4     | 0.08    | 0.13    | 0.04    |
| GAIF01026905.1 | 8.3     | 4.39    | 7.18    | 3.38    | 1.91    | 1.47    |
| GAIF01026906.1 | 0       | 0       | 0       | 0.24    | 0.99    | 0       |
| GAIF01026907.1 | 0.04    | 0       | 0       | 0.05    | 0       | 0       |
| GAIF01026908.1 | 7       | 4.3     | 9.19    | 5.83    | 6.22    | 8.56    |
| GAIF01026909.1 | 0       | 1.32    | 3.71    | 0       | 0       | 5.22    |
| GAIF01026910.1 | 1.16    | 0.56    | 0       | 0.87    | 0.71    | 0.16    |
| GAIF01026911.1 | 17.59   | 7.24    | 7.15    | 1.49    | 2.26    | 3.97    |
| GAIF01026914.1 | 870.04  | 593.57  | 355.37  | 91.26   | 67.48   | 33.85   |
| GAIF01026915.1 | 0       | 0.02    | 0.01    | 0       | 0       | 0       |
| GAIF01026917.1 | 0       | 0       | 0.05    | 0       | 0.05    | 0.25    |
| GAIF01026922.1 | 0       | 0.1     | 0       | 0       | 0.02    | 0       |
| GAIF01026923.1 | 0       | 0.38    | 0.38    | 1.4     | 2.99    | 0       |
| GAIF01026924.1 | 5.24    | 6.21    | 5.55    | 0.73    | 0.26    | 0.46    |
| GAIF01026926.1 | 4.1     | 3.96    | 2.02    | 15.86   | 18.65   | 1.34    |
| GAIF01026928.1 | 21.33   | 3.53    | 4.31    | 18.73   | 15.68   | 15.77   |
| GAIF01026929.1 | 0       | 0       | 0       | 0.54    | 2.78    | 0.68    |
| GAIF01026930.1 | 0.49    | 1.58    | 0       | 2.82    | 2.34    | 0.54    |
| GAIF01026931.1 | 0       | 0       | 0       | 0.08    | 0       | 0       |

|                |         |         |         |        |         |         |
|----------------|---------|---------|---------|--------|---------|---------|
| GAIF01026932.1 | 2091.25 | 2462.57 | 2504.63 | 2404.4 | 2145.49 | 3362.74 |
| GAIF01026934.1 | 0       | 0       | 0       | 0.08   | 0       | 0       |
| GAIF01026935.1 | 16.12   | 1.1     | 1.11    | 37.71  | 131.14  | 409.95  |
| GAIF01026936.1 | 12.04   | 8.22    | 7.34    | 2.68   | 4.05    | 2.04    |
| GAIF01026937.1 | 0.07    | 0.04    | 0       | 0.17   | 0       | 0.04    |
| GAIF01026941.1 | 80.65   | 31.88   | 26.86   | 84.77  | 118.57  | 114.8   |
| GAIF01026943.1 | 0       | 0       | 0.11    | 0      | 0.62    | 0       |
| GAIF01026945.1 | 32.84   | 26.52   | 45.63   | 26.02  | 20.78   | 31.67   |
| GAIF01026946.1 | 61.72   | 61.2    | 48.14   | 266.17 | 197.01  | 38.67   |
| GAIF01026947.1 | 0.18    | 0.27    | 0       | 0.78   | 2.06    | 0.13    |
| GAIF01026948.1 | 0.07    | 0       | 0       | 0      | 0       | 0       |
| GAIF01026949.1 | 16.12   | 6.38    | 3.16    | 28.25  | 3.76    | 0       |
| GAIF01026951.1 | 0       | 0       | 0       | 0.15   | 0       | 0       |
| GAIF01026953.1 | 25.09   | 14.39   | 19.98   | 35.19  | 20.39   | 15.34   |
| GAIF01026955.1 | 0.89    | 0.32    | 0.22    | 6.65   | 23.35   | 1.66    |
| GAIF01026956.1 | 8.7     | 4.88    | 4.93    | 12.52  | 12.41   | 4.75    |
| GAIF01026957.1 | 2.72    | 0.11    | 0.32    | 5.53   | 12.86   | 4.61    |
| GAIF01026958.1 | 0.12    | 0       | 0       | 0.14   | 1.16    | 0       |
| GAIF01026959.1 | 0       | 0       | 0       | 0.3    | 0       | 0       |
| GAIF01026960.1 | 1.46    | 0.93    | 0       | 0.8    | 0.34    | 0.01    |
| GAIF01026962.1 | 0.59    | 0.12    | 0.38    | 0.31   | 0.52    | 0.26    |
| GAIF01026964.1 | 43.14   | 31.9    | 60.6    | 35.76  | 17.24   | 32.33   |
| GAIF01026965.1 | 0.14    | 0.05    | 0.1     | 0.11   | 0.11    | 0.05    |
| GAIF01026966.1 | 1.88    | 5.17    | 5       | 2.33   | 3.33    | 0.74    |
| GAIF01026967.1 | 8.6     | 13.68   | 3.85    | 31.44  | 47.75   | 2.13    |
| GAIF01026968.1 | 56.11   | 46.89   | 35.16   | 51.1   | 81.36   | 35.34   |
| GAIF01026969.1 | 0       | 1.21    | 0.99    | 0      | 0.05    | 0.05    |
| GAIF01026972.1 | 0       | 0       | 0.23    | 0.28   | 0       | 0       |
| GAIF01026973.1 | 0.71    | 1.51    | 0.57    | 1      | 0.43    | 0.19    |
| GAIF01026974.1 | 0.04    | 0       | 0       | 0      | 0       | 0       |
| GAIF01026976.1 | 13.97   | 19.83   | 19.99   | 30.99  | 21.65   | 10.22   |
| GAIF01026978.1 | 0       | 0       | 0       | 0      | 0.52    | 0.48    |
| GAIF01026979.1 | 0.57    | 0.28    | 0       | 1.58   | 2.96    | 0       |
| GAIF01026980.1 | 0       | 0.07    | 0       | 0      | 0       | 0.07    |
| GAIF01026982.1 | 0.13    | 0       | 0       | 0      | 1.12    | 0       |
| GAIF01026983.1 | 0.06    | 0       | 0       | 0      | 0       | 0       |
| GAIF01026984.1 | 0.45    | 1.72    | 0       | 1.38   | 1.01    | 0       |
| GAIF01026985.1 | 43.28   | 63.81   | 27.53   | 66.81  | 77.4    | 18.71   |
| GAIF01026986.1 | 0.53    | 0.12    | 0.12    | 0.87   | 4.75    | 0.24    |
| GAIF01026987.1 | 0       | 0.1     | 0       | 0      | 0       | 0       |
| GAIF01026988.1 | 0.41    | 0.63    | 0.26    | 2.5    | 7       | 2.05    |
| GAIF01026989.1 | 6.53    | 2.35    | 0.35    | 2.75   | 5.89    | 0.81    |
| GAIF01026990.1 | 0       | 0.08    | 0       | 0      | 0       | 0       |
| GAIF01026991.1 | 0       | 0.09    | 0       | 0      | 0       | 0       |



|                |        |        |        |        |        |        |
|----------------|--------|--------|--------|--------|--------|--------|
| GAIF01026994.1 | 0      | 0      | 0      | 0      | 0.46   | 3.2    |
| GAIF01026996.1 | 0      | 0      | 0      | 0.09   | 2.03   | 0      |
| GAIF01026997.1 | 0      | 0      | 0      | 0      | 0.32   | 0      |
| GAIF01026998.1 | 2.71   | 2.82   | 2.13   | 7.79   | 5.04   | 4.47   |
| GAIF01026999.1 | 7.45   | 5      | 5.57   | 14.13  | 9.57   | 3.77   |
| GAIF01027001.1 | 164.22 | 221.81 | 110.11 | 160.94 | 187.81 | 226.77 |
| GAIF01027002.1 | 1.45   | 1.67   | 0.4    | 7.46   | 11.32  | 0.2    |
| GAIF01027003.1 | 0      | 0.03   | 0.04   | 0.74   | 2.07   | 0      |
| GAIF01027005.1 | 4.83   | 0.8    | 0.09   | 6.37   | 14.38  | 0      |
| GAIF01027007.1 | 0      | 0      | 0      | 0      | 0.68   | 0.21   |
| GAIF01027008.1 | 0      | 0      | 0      | 0.5    | 0.37   | 0      |
| GAIF01027010.1 | 2.11   | 0.31   | 0      | 3.43   | 11.68  | 22.34  |
| GAIF01027012.1 | 0.35   | 0      | 0      | 0.76   | 1.08   | 0      |
| GAIF01027014.1 | 0.25   | 0.27   | 0.18   | 0.29   | 3      | 0      |
| GAIF01027015.1 | 0.14   | 0.16   | 0.16   | 0.17   | 0.47   | 0      |
| GAIF01027016.1 | 4.16   | 5.07   | 3.39   | 5.78   | 6.06   | 0.28   |
| GAIF01027017.1 | 0.07   | 0      | 0      | 0      | 0.25   | 0      |
| GAIF01027018.1 | 29.18  | 29.79  | 14.54  | 26.69  | 19.67  | 5.9    |
| GAIF01027019.1 | 0.39   | 0.29   | 0      | 0.92   | 4.91   | 1.89   |
| GAIF01027020.1 | 3.42   | 2.83   | 0.9    | 14.6   | 31.25  | 0.75   |
| GAIF01027022.1 | 1.02   | 0.05   | 0.03   | 0.98   | 1.34   | 0.17   |
| GAIF01027023.1 | 8.12   | 7.52   | 13.86  | 1.05   | 0.12   | 0.22   |
| GAIF01027025.1 | 0.35   | 0.48   | 0.38   | 5.39   | 6.69   | 0.61   |
| GAIF01027026.1 | 0      | 0      | 0      | 3.29   | 0      | 0      |
| GAIF01027027.1 | 0      | 0      | 0      | 1.28   | 0.94   | 3.22   |
| GAIF01027028.1 | 9.33   | 14.1   | 9.91   | 31.05  | 44.57  | 3.48   |
| GAIF01027029.1 | 0      | 0      | 0      | 0      | 0.82   | 0.04   |
| GAIF01027030.1 | 112.75 | 41.08  | 54.91  | 45.53  | 23.01  | 32.92  |
| GAIF01027031.1 | 1.32   | 1.32   | 1.44   | 2.58   | 1.46   | 0.89   |
| GAIF01027032.1 | 10.37  | 10.99  | 12.4   | 10.82  | 9      | 3.91   |
| GAIF01027033.1 | 10.18  | 2.11   | 2.13   | 17.08  | 33.4   | 17.75  |
| GAIF01027035.1 | 0      | 0      | 0      | 0.03   | 0.11   | 0      |
| GAIF01027037.1 | 4.53   | 4.53   | 2.34   | 24.51  | 51.64  | 0.97   |
| GAIF01027041.1 | 0.78   | 0.24   | 0.31   | 0.97   | 1.07   | 0.09   |
| GAIF01027042.1 | 2.93   | 0.5    | 0.05   | 14.26  | 20.98  | 0.15   |
| GAIF01027043.1 | 23.17  | 22.29  | 9.29   | 22.66  | 16.06  | 0      |
| GAIF01027044.1 | 0      | 0      | 0      | 0      | 0.22   | 0      |
| GAIF01027046.1 | 9.85   | 31.58  | 100.99 | 4.98   | 4.63   | 28.96  |
| GAIF01027047.1 | 6.17   | 1.02   | 4.86   | 6.01   | 3.25   | 1.06   |
| GAIF01027049.1 | 37.82  | 49.96  | 51.18  | 80.28  | 42.65  | 37.61  |
| GAIF01027050.1 | 0.71   | 0.26   | 0.05   | 2.36   | 8.64   | 0      |
| GAIF01027052.1 | 0.98   | 0      | 0      | 0.76   | 4.19   | 2.88   |
| GAIF01027053.1 | 50.45  | 48.37  | 67.01  | 151.38 | 73.72  | 70.2   |
| GAIF01027054.1 | 0      | 0      | 0      | 0.07   | 0.67   | 0      |

|                |       |       |       |        |        |       |
|----------------|-------|-------|-------|--------|--------|-------|
| GAIF01027055.1 | 0.11  | 0     | 0     | 0      | 0      | 0     |
| GAIF01027056.1 | 0.35  | 0.35  | 0.14  | 2.31   | 5.67   | 0.11  |
| GAIF01027057.1 | 10.03 | 14.15 | 20.45 | 11.16  | 11.22  | 3.13  |
| GAIF01027058.1 | 2.25  | 1.04  | 0.21  | 1.43   | 2.89   | 0.9   |
| GAIF01027059.1 | 58.59 | 67.2  | 44.82 | 10.92  | 11.26  | 0     |
| GAIF01027061.1 | 0     | 0     | 0.11  | 0.24   | 0.25   | 0     |
| GAIF01027062.1 | 75.06 | 53.19 | 90.75 | 162.3  | 148.25 | 69.09 |
| GAIF01027063.1 | 1.66  | 2.58  | 0     | 1.98   | 4.14   | 0     |
| GAIF01027064.1 | 0.53  | 0.03  | 0.03  | 0.38   | 1.1    | 0.45  |
| GAIF01027065.1 | 18.28 | 25.44 | 21.22 | 44.81  | 41.67  | 10.35 |
| GAIF01027067.1 | 0     | 0.25  | 0     | 0      | 0      | 0     |
| GAIF01027068.1 | 0     | 0     | 0     | 0.04   | 0      | 0     |
| GAIF01027069.1 | 0     | 0     | 0     | 0      | 0.44   | 0     |
| GAIF01027070.1 | 0.63  | 0     | 1.04  | 0.51   | 0      | 0     |
| GAIF01027071.1 | 19.53 | 17.53 | 25.72 | 1.69   | 0.84   | 1.84  |
| GAIF01027072.1 | 0     | 0.13  | 0     | 0      | 0.32   | 0.05  |
| GAIF01027073.1 | 28.84 | 19.6  | 21.73 | 70.55  | 82.17  | 30.91 |
| GAIF01027074.1 | 0.41  | 0     | 0     | 1.1    | 3.26   | 2.1   |
| GAIF01027075.1 | 79.27 | 28.98 | 32.55 | 159.71 | 66.56  | 46.03 |
| GAIF01027076.1 | 0.66  | 0.51  | 0     | 0.11   | 0      | 0     |
| GAIF01027079.1 | 7.36  | 14.17 | 5.05  | 34.84  | 37.52  | 5.02  |
| GAIF01027080.1 | 0     | 0     | 0     | 0      | 1.41   | 1.29  |
| GAIF01027081.1 | 0     | 0     | 0     | 0.03   | 0.14   | 0     |
| GAIF01027083.1 | 0     | 0.02  | 0     | 0      | 0.06   | 0.05  |
| GAIF01027084.1 | 0.12  | 0     | 0     | 1.77   | 6.2    | 0.13  |
| GAIF01027085.1 | 22.43 | 24.39 | 38.08 | 66.77  | 29.65  | 19.8  |
| GAIF01027086.1 | 0.16  | 0.61  | 0.18  | 0.34   | 4.67   | 0.88  |
| GAIF01027087.1 | 0.57  | 0.07  | 0     | 0.07   | 0.15   | 0     |
| GAIF01027089.1 | 0.34  | 0     | 0     | 2.01   | 4.22   | 0.72  |
| GAIF01027090.1 | 0     | 0     | 0     | 0      | 0.37   | 0     |
| GAIF01027091.1 | 0.12  | 0.04  | 0.08  | 0.07   | 0.26   | 0     |
| GAIF01027092.1 | 0     | 0.13  | 0.14  | 0      | 0      | 0     |
| GAIF01027093.1 | 44.76 | 57.24 | 30.74 | 114.58 | 90.55  | 7.11  |
| GAIF01027096.1 | 13.2  | 8.29  | 2.47  | 13.69  | 19.83  | 1.24  |
| GAIF01027097.1 | 7.07  | 5.37  | 2.91  | 3.37   | 2.82   | 0.79  |
| GAIF01027098.1 | 0.35  | 0.47  | 0.29  | 2.05   | 6.64   | 0.25  |
| GAIF01027100.1 | 11.59 | 9.35  | 7.49  | 4.38   | 4.67   | 1.34  |
| GAIF01027101.1 | 0     | 0     | 0     | 0.82   | 0.85   | 0     |
| GAIF01027102.1 | 0.08  | 0.05  | 0     | 0.54   | 0.71   | 0.32  |
| GAIF01027103.1 | 64.03 | 54.91 | 18.74 | 68.96  | 63.48  | 12.54 |
| GAIF01027105.1 | 17.27 | 25.18 | 13.86 | 9.49   | 15.55  | 2.26  |
| GAIF01027106.1 | 0     | 0     | 0     | 0      | 0      | 0.01  |
| GAIF01027108.1 | 10.37 | 14.89 | 11.76 | 56.88  | 66.57  | 4.49  |
| GAIF01027109.1 | 0.21  | 0     | 0.17  | 0      | 0      | 0.05  |

|                |        |        |        |        |       |        |
|----------------|--------|--------|--------|--------|-------|--------|
| GAIF01027110.1 | 0.8    | 1      | 1.08   | 3.12   | 1.48  | 0.58   |
| GAIF01027111.1 | 0.16   | 0.02   | 0      | 0.43   | 1.26  | 0      |
| GAIF01027112.1 | 0.19   | 0      | 0      | 0.22   | 0.23  | 0      |
| GAIF01027113.1 | 21.07  | 22.11  | 21.1   | 28.32  | 29.45 | 17.52  |
| GAIF01027114.1 | 3.55   | 1.84   | 0.99   | 1.2    | 1.45  | 0.9    |
| GAIF01027115.1 | 0      | 0      | 0      | 0.07   | 0.14  | 0      |
| GAIF01027116.1 | 0      | 0.04   | 0.13   | 0      | 0     | 0.86   |
| GAIF01027117.1 | 0.15   | 0      | 0      | 1.88   | 4.88  | 0.08   |
| GAIF01027118.1 | 22.07  | 18.48  | 6.73   | 48.83  | 70.96 | 24.15  |
| GAIF01027122.1 | 13.76  | 7.91   | 8.78   | 12.66  | 17.24 | 20.6   |
| GAIF01027123.1 | 0.06   | 0.12   | 0      | 0.51   | 3.32  | 0.55   |
| GAIF01027125.1 | 0      | 0      | 0      | 0      | 0.15  | 0      |
| GAIF01027127.1 | 0.24   | 0      | 0.16   | 0.68   | 0.46  | 0      |
| GAIF01027128.1 | 85.55  | 129.17 | 168.29 | 3.81   | 3.71  | 11.02  |
| GAIF01027129.1 | 0      | 0      | 0      | 0      | 0.1   | 0      |
| GAIF01027131.1 | 0      | 5.88   | 0      | 0      | 0     | 0      |
| GAIF01027132.1 | 0.05   | 0      | 0      | 0.06   | 0.12  | 0      |
| GAIF01027133.1 | 0      | 0      | 0      | 0      | 0     | 0.07   |
| GAIF01027136.1 | 2.65   | 1.94   | 1.85   | 1.43   | 0.53  | 0      |
| GAIF01027137.1 | 3.24   | 2.58   | 1.64   | 7.96   | 14.4  | 1.37   |
| GAIF01027138.1 | 4.53   | 3.37   | 0      | 6.09   | 21.2  | 0.29   |
| GAIF01027140.1 | 1.41   | 2.31   | 1.72   | 10.55  | 21.63 | 1.15   |
| GAIF01027141.1 | 248.21 | 215.94 | 442.65 | 247.34 | 12.65 | 133.12 |
| GAIF01027142.1 | 0      | 0.09   | 0      | 0      | 0     | 0      |
| GAIF01027144.1 | 0.95   | 1.16   | 0.7    | 1.01   | 0.91  | 0.48   |
| GAIF01027145.1 | 14.33  | 12.11  | 27.3   | 29.26  | 14.33 | 63.65  |
| GAIF01027146.1 | 45.21  | 55.75  | 52.06  | 65.59  | 36.97 | 22.79  |
| GAIF01027148.1 | 12.44  | 10.8   | 1.67   | 84.43  | 161.2 | 10.91  |
| GAIF01027149.1 | 0.6    | 0.52   | 0.4    | 1.4    | 0.58  | 0      |
| GAIF01027151.1 | 0      | 0      | 0      | 0      | 0.11  | 0      |
| GAIF01027152.1 | 9.66   | 5.93   | 6.72   | 27.08  | 35.19 | 6.22   |
| GAIF01027153.1 | 167.05 | 160.73 | 155.69 | 10.58  | 10.56 | 23.07  |
| GAIF01027158.1 | 46.62  | 69.7   | 22.39  | 71.02  | 52.56 | 28.9   |
| GAIF01027159.1 | 0      | 0      | 0      | 0      | 0     | 0.38   |
| GAIF01027160.1 | 0      | 0.05   | 0      | 0      | 0     | 0      |
| GAIF01027161.1 | 5.6    | 5.2    | 4.52   | 19.13  | 16.45 | 2.27   |
| GAIF01027162.1 | 0.18   | 0      | 0      | 0      | 0     | 0      |
| GAIF01027163.1 | 6.8    | 9.42   | 4.21   | 19.92  | 15.53 | 3.76   |
| GAIF01027166.1 | 7.38   | 10.85  | 17.47  | 11.28  | 9.87  | 2.52   |
| GAIF01027168.1 | 0      | 0      | 0      | 0      | 9.99  | 4.76   |
| GAIF01027169.1 | 0.45   | 0.47   | 0      | 0.78   | 0     | 0      |
| GAIF01027171.1 | 0      | 0.05   | 0.05   | 0      | 0.25  | 0      |
| GAIF01027173.1 | 0.27   | 0      | 0      | 0.27   | 0     | 0      |
| GAIF01027174.1 | 0      | 0      | 0      | 0.21   | 0     | 0      |

|                |        |       |        |        |        |        |
|----------------|--------|-------|--------|--------|--------|--------|
| GAIF01027175.1 | 46.54  | 47.59 | 56.75  | 4.21   | 2.7    | 1.96   |
| GAIF01027176.1 | 0.12   | 0.78  | 1.18   | 0.97   | 0.72   | 0      |
| GAIF01027177.1 | 19.96  | 19.79 | 28.57  | 32.61  | 14.59  | 19     |
| GAIF01027178.1 | 0      | 10.43 | 0      | 0      | 1.19   | 0      |
| GAIF01027180.1 | 2.59   | 2.97  | 0.7    | 6.66   | 14.21  | 0      |
| GAIF01027184.1 | 11.68  | 9.63  | 12.18  | 18.36  | 8.02   | 11.27  |
| GAIF01027186.1 | 140.5  | 134.3 | 271.72 | 143.41 | 119.71 | 157.04 |
| GAIF01027187.1 | 0      | 0     | 0      | 1.62   | 8.08   | 0      |
| GAIF01027188.1 | 0      | 0     | 0      | 0.47   | 0.98   | 0.22   |
| GAIF01027189.1 | 0.37   | 0.25  | 0.82   | 2.22   | 4.03   | 0.58   |
| GAIF01027190.1 | 0      | 0.26  | 0      | 0      | 0      | 0.37   |
| GAIF01027191.1 | 46.83  | 78.12 | 73.23  | 35.05  | 18.93  | 30.8   |
| GAIF01027194.1 | 0.93   | 0.25  | 0.51   | 1.21   | 5.99   | 0      |
| GAIF01027195.1 | 0      | 0     | 0      | 0      | 0.08   | 0      |
| GAIF01027199.1 | 107.94 | 27.84 | 37.43  | 115.04 | 131.86 | 72     |
| GAIF01027201.1 | 73.02  | 81.33 | 41.7   | 117.4  | 87.53  | 5.3    |
| GAIF01027203.1 | 0      | 1.8   | 1.92   | 0      | 0      | 0.1    |
| GAIF01027204.1 | 0      | 0     | 0      | 0      | 0.05   | 0      |
| GAIF01027206.1 | 21.05  | 11.92 | 20.56  | 45     | 55.3   | 16.39  |
| GAIF01027207.1 | 243.04 | 55.46 | 63.89  | 196.74 | 184.28 | 83.45  |
| GAIF01027208.1 | 21.6   | 0     | 0      | 0      | 0      | 0      |
| GAIF01027211.1 | 9.61   | 12.87 | 14.99  | 28.62  | 11.06  | 7.37   |
| GAIF01027212.1 | 101.56 | 98.1  | 152.08 | 38.15  | 13.06  | 24.46  |
| GAIF01027213.1 | 0.34   | 0.18  | 0      | 0.39   | 7.34   | 3.17   |
| GAIF01027214.1 | 0.33   | 0.21  | 0.36   | 0.05   | 0.06   | 0      |
| GAIF01027215.1 | 4.31   | 4.97  | 1.45   | 15.66  | 12     | 0.82   |
| GAIF01027216.1 | 1.41   | 2.04  | 0.62   | 8.16   | 3.95   | 0.31   |
| GAIF01027217.1 | 2.4    | 2.21  | 1.01   | 2.04   | 1.78   | 0.2    |
| GAIF01027218.1 | 0      | 0     | 0.11   | 0      | 0      | 0      |
| GAIF01027219.1 | 0      | 7.96  | 4.36   | 0      | 0      | 0.59   |
| GAIF01027220.1 | 0.11   | 0     | 0      | 0.26   | 0.14   | 0      |
| GAIF01027223.1 | 4.17   | 9.81  | 9.07   | 15.87  | 12.02  | 0.69   |
| GAIF01027224.1 | 0      | 0     | 0      | 0.06   | 0.14   | 0      |
| GAIF01027225.1 | 20.5   | 23.39 | 15.57  | 53.45  | 34.28  | 10.42  |
| GAIF01027226.1 | 2.76   | 12.36 | 4.15   | 23.48  | 20.14  | 1.23   |
| GAIF01027228.1 | 0      | 0.36  | 0      | 0      | 0      | 0      |
| GAIF01027230.1 | 4.32   | 2.28  | 2.31   | 2.84   | 0.84   | 0.77   |
| GAIF01027231.1 | 2.66   | 0     | 1.26   | 0      | 1.57   | 0      |
| GAIF01027232.1 | 1.7    | 1.7   | 1.15   | 2.27   | 0.63   | 0.14   |
| GAIF01027233.1 | 11.29  | 4.98  | 7.86   | 23.05  | 22.19  | 23.02  |
| GAIF01027234.1 | 17.41  | 11.29 | 26.66  | 37.58  | 82.85  | 145.98 |
| GAIF01027237.1 | 1.01   | 0.57  | 1.03   | 0.36   | 1.34   | 1.81   |
| GAIF01027238.1 | 0.09   | 0     | 0      | 0.05   | 0      | 0      |
| GAIF01027239.1 | 0      | 0     | 0      | 2.52   | 0      | 0      |

|                |        |        |        |        |        |        |
|----------------|--------|--------|--------|--------|--------|--------|
| GAIF01027242.1 | 5.77   | 6.69   | 4.36   | 6.71   | 4.34   | 1.03   |
| GAIF01027243.1 | 464.67 | 143.64 | 172.55 | 8.23   | 7.04   | 0.92   |
| GAIF01027244.1 | 16.92  | 32.34  | 17.42  | 79.22  | 69.78  | 1.4    |
| GAIF01027246.1 | 1.2    | 0      | 16.26  | 5.02   | 0      | 0      |
| GAIF01027247.1 | 0.28   | 0.41   | 0.1    | 0.76   | 2.26   | 0      |
| GAIF01027248.1 | 0      | 0.07   | 0      | 0      | 0.12   | 0      |
| GAIF01027249.1 | 0.54   | 0.25   | 0.04   | 0.25   | 1.39   | 0.11   |
| GAIF01027251.1 | 0      | 0      | 0      | 0      | 0.05   | 0      |
| GAIF01027252.1 | 0      | 0      | 0      | 0      | 1.66   | 0      |
| GAIF01027254.1 | 0      | 0      | 0      | 0      | 0      | 0.66   |
| GAIF01027255.1 | 0.29   | 0.33   | 0.09   | 0.72   | 0.41   | 0.07   |
| GAIF01027257.1 | 17.89  | 37     | 27.73  | 36.62  | 52.46  | 3.93   |
| GAIF01027258.1 | 9.5    | 19.97  | 8.81   | 37.4   | 24.97  | 2.64   |
| GAIF01027259.1 | 31.79  | 43.07  | 37.19  | 4.54   | 3.45   | 0.29   |
| GAIF01027260.1 | 0.02   | 0      | 0      | 0      | 0      | 0      |
| GAIF01027262.1 | 0.15   | 0.16   | 0.11   | 2.95   | 4.02   | 0      |
| GAIF01027263.1 | 0      | 0      | 0      | 0.28   | 0      | 0      |
| GAIF01027264.1 | 0      | 0      | 0      | 0.19   | 0.69   | 0      |
| GAIF01027265.1 | 5.31   | 1.82   | 3.4    | 10.59  | 10.1   | 6.1    |
| GAIF01027266.1 | 18.62  | 44.94  | 44.57  | 43.88  | 19.33  | 9.31   |
| GAIF01027267.1 | 15.18  | 5.18   | 17.24  | 25.53  | 21.22  | 45.67  |
| GAIF01027268.1 | 3.39   | 3.27   | 2.7    | 0.74   | 1.3    | 1.47   |
| GAIF01027270.1 | 14.54  | 0      | 17.93  | 0      | 22.89  | 0      |
| GAIF01027271.1 | 6.49   | 7.87   | 2.5    | 9.34   | 8.82   | 0.22   |
| GAIF01027272.1 | 3.04   | 0.58   | 0.07   | 0.55   | 1.36   | 0.07   |
| GAIF01027273.1 | 15.92  | 17.31  | 16.21  | 33.08  | 28.56  | 7.92   |
| GAIF01027274.1 | 0      | 0      | 0      | 0.27   | 0      | 0      |
| GAIF01027275.1 | 0      | 0      | 0      | 0.75   | 3.13   | 0      |
| GAIF01027276.1 | 0.11   | 0.23   | 0.23   | 3.46   | 8.96   | 0.23   |
| GAIF01027277.1 | 34.41  | 37     | 19.59  | 8.43   | 7.66   | 1.26   |
| GAIF01027278.1 | 0      | 0.14   | 0.58   | 0      | 0      | 0      |
| GAIF01027279.1 | 37.42  | 23.81  | 12.6   | 13.84  | 12.09  | 3.15   |
| GAIF01027280.1 | 0      | 0      | 0      | 0.06   | 0.18   | 0      |
| GAIF01027281.1 | 0      | 0.11   | 0      | 0.11   | 0.82   | 0      |
| GAIF01027283.1 | 2.93   | 2.37   | 2.02   | 0.87   | 1.81   | 0.09   |
| GAIF01027284.1 | 0      | 0      | 0      | 0.16   | 0      | 0      |
| GAIF01027285.1 | 1.81   | 0.1    | 0.31   | 0      | 0      | 0      |
| GAIF01027286.1 | 0      | 0.07   | 0      | 0      | 0.08   | 0      |
| GAIF01027288.1 | 3.83   | 5.13   | 3.2    | 3.84   | 3.66   | 1.84   |
| GAIF01027289.1 | 165.69 | 153.47 | 84.97  | 253.97 | 323.06 | 201.27 |
| GAIF01027290.1 | 268.1  | 211.7  | 72     | 93.81  | 147.33 | 26.14  |
| GAIF01027291.1 | 0.4    | 0.22   | 0      | 2.22   | 14.3   | 0      |
| GAIF01027293.1 | 0      | 3.08   | 11.89  | 6.63   | 5.65   | 0      |
| GAIF01027294.1 | 0.28   | 0.29   | 0.13   | 1.65   | 5.21   | 0.18   |

|                |         |         |         |         |         |         |
|----------------|---------|---------|---------|---------|---------|---------|
| GAIF01027295.1 | 0.11    | 0       | 0       | 0       | 0       | 0       |
| GAIF01027296.1 | 0.89    | 1.1     | 0       | 2.82    | 6.53    | 0       |
| GAIF01027297.1 | 5.25    | 2.91    | 2.28    | 8.28    | 21.8    | 7.97    |
| GAIF01027299.1 | 0.02    | 0.11    | 0.04    | 0.04    | 0.14    | 0       |
| GAIF01027300.1 | 46.63   | 84.17   | 27.24   | 37.13   | 31.36   | 1.54    |
| GAIF01027301.1 | 2211.03 | 871.55  | 1416.37 | 1217.97 | 1426.62 | 8506.42 |
| GAIF01027305.1 | 33.94   | 18.17   | 14.28   | 98.58   | 100.4   | 44.18   |
| GAIF01027306.1 | 0.36    | 0       | 0       | 0       | 0       | 0.8     |
| GAIF01027307.1 | 33.5    | 17.88   | 11.65   | 77.1    | 75.13   | 7.86    |
| GAIF01027309.1 | 14.13   | 4.6     | 5.43    | 42.99   | 81.73   | 24.42   |
| GAIF01027311.1 | 7.55    | 10.23   | 6.79    | 31.36   | 42.21   | 5.35    |
| GAIF01027312.1 | 11.58   | 1.32    | 0.55    | 41.24   | 67.24   | 5.36    |
| GAIF01027313.1 | 8.25    | 13.84   | 9.75    | 9.6     | 24.61   | 6.89    |
| GAIF01027314.1 | 3400.09 | 4983.03 | 8884.64 | 2012.54 | 1396.13 | 5617.1  |
| GAIF01027315.1 | 98.82   | 190.72  | 307.06  | 117.41  | 69.26   | 75.74   |
| GAIF01027316.1 | 6.45    | 3.26    | 4.63    | 10.86   | 7.32    | 4.41    |
| GAIF01027318.1 | 0       | 0       | 0       | 0       | 0.36    | 0       |
| GAIF01027319.1 | 213.3   | 8.24    | 9.89    | 472.6   | 919.42  | 11.47   |
| GAIF01027321.1 | 57.05   | 66.65   | 103.97  | 83.95   | 38.64   | 60.84   |
| GAIF01027322.1 | 15.29   | 11.63   | 5.03    | 8.2     | 9.88    | 3.79    |
| GAIF01027324.1 | 1       | 4.1     | 2.16    | 7.45    | 15.42   | 0       |
| GAIF01027325.1 | 4.22    | 11.49   | 7.67    | 12.43   | 16.07   | 1.06    |
| GAIF01027326.1 | 0.19    | 0       | 0.21    | 0       | 0       | 0       |
| GAIF01027328.1 | 80.78   | 52.07   | 31.24   | 92.08   | 88.04   | 9.47    |
| GAIF01027329.1 | 52.03   | 35.43   | 27.54   | 50.89   | 21.8    | 4.48    |
| GAIF01027331.1 | 0       | 0       | 0       | 0       | 0.33    | 0       |
| GAIF01027332.1 | 0       | 0       | 0       | 0       | 0.13    | 0       |
| GAIF01027335.1 | 15.27   | 10.83   | 19.07   | 39.84   | 45.4    | 27.4    |
| GAIF01027339.1 | 0       | 0.6     | 1.07    | 0       | 0       | 0       |
| GAIF01027340.1 | 0.76    | 1.83    | 1.51    | 2.66    | 4.59    | 0       |
| GAIF01027341.1 | 0.6     | 0.39    | 0       | 0.56    | 2.17    | 0.4     |
| GAIF01027342.1 | 0       | 0       | 0.13    | 0       | 0       | 0       |
| GAIF01027343.1 | 13.59   | 12.09   | 9.61    | 31.42   | 21.42   | 10.78   |
| GAIF01027344.1 | 9.62    | 10.14   | 4.4     | 48.52   | 48.44   | 2.65    |
| GAIF01027345.1 | 0.32    | 0       | 0       | 0.92    | 0       | 0       |
| GAIF01027347.1 | 190.78  | 180.82  | 150.89  | 95.08   | 70.23   | 166.39  |
| GAIF01027350.1 | 0.53    | 0.41    | 0.38    | 0.06    | 0.12    | 0.29    |
| GAIF01027352.1 | 0       | 0       | 0.01    | 0       | 0       | 0       |
| GAIF01027353.1 | 0.3     | 0.57    | 0.31    | 0.17    | 0.24    | 0.08    |
| GAIF01027354.1 | 42.12   | 18.51   | 50.93   | 10.34   | 2.28    | 24.02   |
| GAIF01027355.1 | 0       | 0       | 0       | 0       | 0.13    | 0       |
| GAIF01027357.1 | 0.54    | 0.3     | 0.04    | 0.18    | 0.42    | 0       |
| GAIF01027358.1 | 4.46    | 11.67   | 9.55    | 13.54   | 14.86   | 1.44    |
| GAIF01027359.1 | 6.85    | 0.51    | 0.84    | 7.68    | 0.58    | 0.45    |

|                |        |        |        |        |        |        |
|----------------|--------|--------|--------|--------|--------|--------|
| GAIF01027362.1 | 136.01 | 138.49 | 153.67 | 214    | 191.55 | 476.46 |
| GAIF01027364.1 | 0.23   | 0      | 0      | 0.13   | 0      | 0      |
| GAIF01027365.1 | 16.09  | 12.19  | 13.42  | 40.93  | 46.59  | 7.54   |
| GAIF01027367.1 | 0      | 0      | 0      | 0      | 0.7    | 0      |
| GAIF01027368.1 | 0.17   | 0      | 0.55   | 0.39   | 2.01   | 0      |
| GAIF01027372.1 | 30.75  | 16.12  | 33.68  | 85.39  | 76.15  | 117.27 |
| GAIF01027373.1 | 7.01   | 10.44  | 7.92   | 15.7   | 34.63  | 10.43  |
| GAIF01027374.1 | 46.88  | 66.76  | 39.96  | 104.88 | 49.92  | 9.82   |
| GAIF01027375.1 | 0.16   | 0      | 0      | 0      | 0.19   | 0      |
| GAIF01027378.1 | 4.12   | 17.16  | 1.09   | 17.73  | 38.73  | 0.3    |
| GAIF01027379.1 | 39.91  | 33.15  | 32.52  | 95.51  | 55.38  | 20.07  |
| GAIF01027380.1 | 0      | 0.2    | 0      | 1.23   | 7.57   | 0      |
| GAIF01027381.1 | 0      | 0      | 0      | 0      | 0.12   | 0      |
| GAIF01027382.1 | 0.06   | 0      | 0      | 0      | 0      | 0      |
| GAIF01027383.1 | 1.4    | 1.52   | 0.77   | 4.46   | 12.61  | 1.93   |
| GAIF01027384.1 | 0.34   | 0      | 0      | 0.83   | 6.52   | 0.78   |
| GAIF01027387.1 | 0      | 0.11   | 0.11   | 0.12   | 0      | 0.11   |
| GAIF01027388.1 | 0      | 0      | 0      | 0      | 0.13   | 0      |
| GAIF01027389.1 | 0      | 0      | 0      | 0.06   | 0.06   | 0      |
| GAIF01027390.1 | 0.18   | 0      | 0      | 0      | 0      | 0      |
| GAIF01027391.1 | 0      | 0.13   | 0      | 0.29   | 0      | 0.14   |
| GAIF01027392.1 | 5.51   | 0.7    | 0.32   | 16.25  | 115.79 | 1.74   |
| GAIF01027393.1 | 17.33  | 22.75  | 60.86  | 15.39  | 7.44   | 24.69  |
| GAIF01027395.1 | 1.09   | 1.27   | 1.77   | 1.46   | 1.31   | 0.22   |
| GAIF01027398.1 | 0.66   | 0.73   | 0      | 4.38   | 6.94   | 0.36   |
| GAIF01027399.1 | 0      | 0      | 0.1    | 0.1    | 1.46   | 0      |
| GAIF01027400.1 | 18.08  | 13.3   | 32.99  | 60.18  | 30.22  | 61.83  |
| GAIF01027401.1 | 1.51   | 3.14   | 6.42   | 5.17   | 0      | 6.51   |
| GAIF01027402.1 | 0      | 0.03   | 0      | 0      | 0      | 0      |
| GAIF01027403.1 | 3.47   | 4.59   | 6.75   | 2.08   | 1.4    | 1.62   |
| GAIF01027404.1 | 2.2    | 2.22   | 1.38   | 4.37   | 1.32   | 0.69   |
| GAIF01027405.1 | 2.07   | 1.4    | 0.43   | 10.71  | 14.52  | 0.85   |
| GAIF01027406.1 | 0      | 0.09   | 0      | 0.1    | 0.1    | 0      |
| GAIF01027408.1 | 1.31   | 0.55   | 0.67   | 4.8    | 15.78  | 15.47  |
| GAIF01027410.1 | 0      | 0      | 0      | 0      | 0.07   | 0      |
| GAIF01027412.1 | 0.16   | 0      | 0      | 0      | 1.72   | 0      |
| GAIF01027413.1 | 1.13   | 0.54   | 0.41   | 6.82   | 31.12  | 0.96   |
| GAIF01027414.1 | 13.26  | 10.58  | 10.31  | 55.8   | 103.15 | 10.23  |
| GAIF01027415.1 | 0      | 0      | 0      | 0      | 0.18   | 0      |
| GAIF01027416.1 | 6.86   | 4.18   | 5.58   | 38.03  | 59.93  | 8.32   |
| GAIF01027417.1 | 0      | 0      | 0      | 0.47   | 2.65   | 0      |
| GAIF01027419.1 | 0.46   | 0.12   | 0      | 0.4    | 7.32   | 2.53   |
| GAIF01027420.1 | 19.32  | 15.51  | 14.32  | 32.14  | 26.98  | 10.09  |
| GAIF01027421.1 | 2.29   | 2.91   | 2.65   | 3.95   | 3.53   | 0.5    |

|                |       |        |        |       |       |        |
|----------------|-------|--------|--------|-------|-------|--------|
| GAIF01027424.1 | 41.37 | 100.67 | 141.67 | 74.62 | 53.46 | 29.49  |
| GAIF01027425.1 | 1.77  | 2.73   | 2.39   | 1.1   | 2.42  | 3.9    |
| GAIF01027427.1 | 0     | 0      | 0.03   | 0.03  | 0     | 0      |
| GAIF01027429.1 | 0.86  | 0.13   | 0      | 0     | 0     | 0.39   |
| GAIF01027430.1 | 0.05  | 0      | 0      | 0     | 0.06  | 0      |
| GAIF01027433.1 | 0     | 0      | 0      | 0     | 0.26  | 0      |
| GAIF01027434.1 | 5.53  | 6.56   | 9.35   | 23.96 | 11.89 | 4.45   |
| GAIF01027436.1 | 0     | 0      | 0      | 0     | 0.37  | 0      |
| GAIF01027437.1 | 0.44  | 0.42   | 0.34   | 1.92  | 0     | 0      |
| GAIF01027438.1 | 0.05  | 0      | 0      | 0     | 0     | 0      |
| GAIF01027440.1 | 3.23  | 6.33   | 2.64   | 10.87 | 22.08 | 0.63   |
| GAIF01027444.1 | 0     | 0      | 0      | 0     | 0     | 0.12   |
| GAIF01027448.1 | 0     | 0      | 0      | 0.34  | 0     | 0      |
| GAIF01027449.1 | 0.44  | 0.18   | 0.42   | 0.13  | 0     | 0.24   |
| GAIF01027450.1 | 40.69 | 42.56  | 71.74  | 35.42 | 23.29 | 51.75  |
| GAIF01027451.1 | 0     | 0.11   | 0      | 0     | 0.79  | 0.43   |
| GAIF01027452.1 | 15.33 | 9.4    | 8.23   | 47.62 | 30.56 | 3.1    |
| GAIF01027453.1 | 85.54 | 111.59 | 38.85  | 38.38 | 40    | 0      |
| GAIF01027454.1 | 34.97 | 27.97  | 35.85  | 70.1  | 31.88 | 18.79  |
| GAIF01027457.1 | 47.15 | 28.12  | 59.93  | 112.4 | 62.21 | 132.84 |
| GAIF01027458.1 | 0     | 0.6    | 0      | 1.54  | 0.2   | 0      |
| GAIF01027459.1 | 11.4  | 11.58  | 14.48  | 28.54 | 12.59 | 7.84   |
| GAIF01027460.1 | 0.32  | 0.17   | 0.28   | 0.44  | 1.18  | 0.03   |
| GAIF01027462.1 | 1.37  | 0.5    | 1.94   | 1.59  | 3.57  | 5.83   |
| GAIF01027466.1 | 0     | 0      | 0      | 0.16  | 0     | 0      |
| GAIF01027467.1 | 0.05  | 0      | 0.05   | 0     | 0.06  | 0      |
| GAIF01027468.1 | 5.06  | 6.78   | 5.15   | 21.76 | 20.05 | 2.35   |
| GAIF01027472.1 | 29.3  | 22.81  | 4.5    | 61.41 | 50.69 | 0      |
| GAIF01027474.1 | 0.09  | 0.05   | 0.03   | 0.21  | 0.04  | 0.08   |
| GAIF01027475.1 | 0.06  | 0      | 0      | 0     | 0     | 0      |
| GAIF01027476.1 | 1.93  | 0.18   | 0.18   | 11.78 | 30.81 | 15.63  |
| GAIF01027478.1 | 0.24  | 0      | 0      | 0     | 0.43  | 0      |
| GAIF01027479.1 | 0     | 0      | 0      | 0.25  | 0.26  | 0      |
| GAIF01027480.1 | 0     | 0      | 0      | 0     | 0.11  | 0      |
| GAIF01027481.1 | 12.89 | 9.39   | 6.37   | 15.33 | 17.46 | 12.41  |
| GAIF01027483.1 | 2.36  | 1.21   | 1.7    | 3.13  | 6.5   | 3.24   |
| GAIF01027484.1 | 9.3   | 8.8    | 0.38   | 1.6   | 2.49  | 0      |
| GAIF01027485.1 | 0.09  | 0.08   | 0      | 0     | 0.7   | 0.08   |
| GAIF01027486.1 | 0.02  | 0      | 0      | 4.19  | 12.17 | 0.09   |
| GAIF01027487.1 | 32.06 | 14.23  | 16.75  | 13.31 | 11.99 | 45.96  |
| GAIF01027488.1 | 0     | 0      | 0      | 0.24  | 0.38  | 0      |
| GAIF01027489.1 | 3.44  | 4.54   | 9.12   | 5.11  | 5.57  | 13.98  |
| GAIF01027490.1 | 1.25  | 0.1    | 0      | 2.12  | 15.73 | 0.25   |
| GAIF01027492.1 | 0.12  | 0      | 0      | 0     | 0     | 0      |



|                |        |        |        |        |        |         |
|----------------|--------|--------|--------|--------|--------|---------|
| GAIF01027493.1 | 0      | 0      | 0      | 0      | 0.08   | 0       |
| GAIF01027494.1 | 0      | 0      | 0      | 0      | 0.2    | 0       |
| GAIF01027495.1 | 0      | 0.06   | 0      | 0.33   | 1.25   | 0       |
| GAIF01027497.1 | 0      | 0      | 0      | 0      | 0.1    | 0       |
| GAIF01027498.1 | 27.57  | 38.97  | 29     | 27.07  | 17.44  | 15.61   |
| GAIF01027499.1 | 3.96   | 7.6    | 6.05   | 14.42  | 7.92   | 1.18    |
| GAIF01027501.1 | 33.37  | 35.68  | 15.56  | 61.68  | 54.67  | 16.52   |
| GAIF01027502.1 | 10.56  | 19.87  | 5.94   | 6.13   | 6.67   | 0.3     |
| GAIF01027505.1 | 0      | 0      | 0      | 0.08   | 0.04   | 0       |
| GAIF01027508.1 | 0      | 0      | 0      | 0      | 0.21   | 0       |
| GAIF01027513.1 | 0      | 0      | 0      | 0.05   | 0.06   | 0       |
| GAIF01027515.1 | 115.12 | 189.9  | 220.19 | 339.97 | 311.76 | 132.02  |
| GAIF01027516.1 | 26.1   | 42.84  | 8.4    | 31.56  | 23.98  | 0.8     |
| GAIF01027517.1 | 0.09   | 0      | 0      | 0.4    | 0.21   | 0       |
| GAIF01027518.1 | 0      | 0      | 0      | 0      | 0.22   | 0       |
| GAIF01027520.1 | 49.4   | 34.6   | 31.33  | 98.19  | 75.81  | 11.91   |
| GAIF01027524.1 | 0.14   | 0.6    | 1.51   | 0.48   | 0.17   | 0.61    |
| GAIF01027525.1 | 21.97  | 29.23  | 19.28  | 46.59  | 51.43  | 6.75    |
| GAIF01027526.1 | 4.2    | 1.07   | 0.92   | 12.03  | 38.57  | 8.8     |
| GAIF01027528.1 | 0.18   | 0      | 0.02   | 0.84   | 5.79   | 0.13    |
| GAIF01027529.1 | 103.96 | 116.74 | 44     | 11.92  | 5.45   | 3.16    |
| GAIF01027530.1 | 11.36  | 22.39  | 10.1   | 78.78  | 105.56 | 4.26    |
| GAIF01027531.1 | 0.14   | 0      | 0      | 0.5    | 1.72   | 0       |
| GAIF01027533.1 | 296.51 | 295.58 | 561.74 | 195.41 | 114.74 | 168.83  |
| GAIF01027534.1 | 223.49 | 140.39 | 258.05 | 18.49  | 7.79   | 22.55   |
| GAIF01027535.1 | 0      | 0      | 0      | 0.28   | 1.35   | 0       |
| GAIF01027537.1 | 27.83  | 10.96  | 6.35   | 59.08  | 83.03  | 29.3    |
| GAIF01027538.1 | 0      | 0      | 0      | 0.04   | 0.13   | 0       |
| GAIF01027539.1 | 0.15   | 1.37   | 0.32   | 0.28   | 0.52   | 0       |
| GAIF01027540.1 | 0      | 0.03   | 0      | 0.08   | 0      | 0       |
| GAIF01027541.1 | 0      | 0      | 0      | 0.15   | 0.3    | 0       |
| GAIF01027542.1 | 1.51   | 0.68   | 0.05   | 1.52   | 5.81   | 0.48    |
| GAIF01027543.1 | 0.03   | 0.04   | 0      | 0.06   | 0.18   | 0       |
| GAIF01027544.1 | 686.2  | 257.67 | 188.82 | 771.6  | 668.55 | 1386.75 |
| GAIF01027545.1 | 226.57 | 179.9  | 173.64 | 118.8  | 113.07 | 79.27   |
| GAIF01027546.1 | 7.38   | 0      | 0.6    | 3.78   | 2.94   | 6.53    |
| GAIF01027547.1 | 10.27  | 13.58  | 17.37  | 20.03  | 12.7   | 5.75    |
| GAIF01027549.1 | 0.8    | 0.24   | 0.44   | 1.77   | 2.88   | 0.83    |
| GAIF01027551.1 | 117.77 | 121.16 | 75.69  | 171.22 | 179.53 | 79.51   |
| GAIF01027552.1 | 0      | 0.07   | 0      | 0      | 0      | 0       |
| GAIF01027553.1 | 0      | 0      | 0.17   | 0.18   | 0.76   | 0       |
| GAIF01027555.1 | 0.17   | 0      | 0      | 0.4    | 0.72   | 0       |
| GAIF01027556.1 | 5.5    | 3.91   | 4.52   | 16.75  | 13.82  | 4.2     |
| GAIF01027557.1 | 0.5    | 0.22   | 0.88   | 0      | 0      | 0       |

|                |         |         |         |         |         |         |
|----------------|---------|---------|---------|---------|---------|---------|
| GAIF01027558.1 | 0       | 0.13    | 0       | 0.12    | 0.77    | 0       |
| GAIF01027559.1 | 12.71   | 7.13    | 8.1     | 18.63   | 22.78   | 7.47    |
| GAIF01027560.1 | 0.31    | 0.46    | 0.06    | 0.55    | 0       | 0.06    |
| GAIF01027561.1 | 0       | 0       | 0       | 0       | 2.32    | 0       |
| GAIF01027562.1 | 0.11    | 0       | 0.03    | 32.68   | 15.37   | 0.04    |
| GAIF01027563.1 | 8.14    | 10.53   | 7.79    | 21.29   | 33.2    | 11.74   |
| GAIF01027564.1 | 0       | 0       | 0       | 0       | 0.24    | 0       |
| GAIF01027567.1 | 0.16    | 0.09    | 0.09    | 0.24    | 0.73    | 0       |
| GAIF01027568.1 | 11.22   | 8.43    | 6.24    | 27.18   | 20.39   | 7.01    |
| GAIF01027569.1 | 0       | 0.14    | 0.03    | 0.08    | 0.08    | 0       |
| GAIF01027571.1 | 0       | 0.41    | 0       | 0       | 0       | 0       |
| GAIF01027573.1 | 0.05    | 0       | 0       | 0       | 0       | 0       |
| GAIF01027575.1 | 0       | 0       | 0.04    | 0       | 0       | 0       |
| GAIF01027576.1 | 0.18    | 0       | 0       | 0.2     | 0.21    | 0       |
| GAIF01027577.1 | 2.2     | 0.43    | 0.1     | 0.11    | 0       | 0       |
| GAIF01027578.1 | 0.15    | 0.48    | 0.48    | 0.34    | 0.71    | 0       |
| GAIF01027581.1 | 35.09   | 7.39    | 8.97    | 4.04    | 1.01    | 0.35    |
| GAIF01027582.1 | 0.66    | 0.43    | 0       | 0.31    | 0       | 0       |
| GAIF01027584.1 | 34.04   | 44.48   | 25.86   | 68.65   | 57.73   | 14.4    |
| GAIF01027586.1 | 0       | 0.08    | 0       | 0.16    | 1.17    | 0.31    |
| GAIF01027587.1 | 0       | 0.31    | 0       | 0.33    | 1.04    | 0       |
| GAIF01027588.1 | 0       | 0.14    | 0       | 0       | 0       | 0       |
| GAIF01027590.1 | 100.75  | 34.7    | 36.13   | 149.24  | 204.23  | 91.93   |
| GAIF01027591.1 | 3593.17 | 3842.46 | 4814.58 | 2310.06 | 1718.35 | 2256.96 |
| GAIF01027592.1 | 0.13    | 0       | 0       | 1.32    | 5.64    | 0       |
| GAIF01027593.1 | 0       | 0.02    | 0.02    | 0       | 0.02    | 0       |
| GAIF01027594.1 | 1.3     | 1.67    | 1.56    | 3.16    | 3.13    | 0.52    |
| GAIF01027595.1 | 146.96  | 95.56   | 86.71   | 276.39  | 332.52  | 177.24  |
| GAIF01027596.1 | 0.1     | 0       | 0       | 0       | 0.17    | 0.05    |
| GAIF01027597.1 | 14.59   | 13.33   | 9.5     | 47.28   | 24.55   | 3.7     |
| GAIF01027598.1 | 0.31    | 2.12    | 0.95    | 0.17    | 1.82    | 0.34    |
| GAIF01027602.1 | 0.53    | 0.39    | 0       | 0       | 0       | 0.07    |
| GAIF01027603.1 | 0       | 0       | 0       | 0.14    | 0.84    | 0       |
| GAIF01027604.1 | 0       | 0       | 0.14    | 0       | 0.25    | 0       |
| GAIF01027605.1 | 7.13    | 2.24    | 4.67    | 8.91    | 1.81    | 16.92   |
| GAIF01027606.1 | 12.42   | 6.87    | 6.89    | 29.15   | 30.25   | 35.02   |
| GAIF01027607.1 | 0       | 0       | 0.04    | 0       | 0       | 0       |
| GAIF01027608.1 | 0.13    | 0       | 0       | 0.23    | 0       | 0       |
| GAIF01027609.1 | 0.29    | 0.06    | 0.19    | 1.06    | 3.38    | 0.25    |
| GAIF01027610.1 | 7.28    | 7.19    | 6.53    | 22.83   | 18.93   | 1.94    |
| GAIF01027611.1 | 0.49    | 0       | 0       | 0       | 0       | 0       |
| GAIF01027612.1 | 0       | 0       | 0       | 0.07    | 0.51    | 0.07    |
| GAIF01027614.1 | 0.96    | 0.82    | 0.88    | 0.04    | 0.04    | 0.12    |
| GAIF01027615.1 | 0       | 0       | 0       | 0.04    | 0.48    | 0       |

|                |        |        |        |        |        |        |
|----------------|--------|--------|--------|--------|--------|--------|
| GAIF01027617.1 | 198.33 | 370.37 | 91.08  | 175.29 | 269.75 | 31.83  |
| GAIF01027619.1 | 73.97  | 105.81 | 68.99  | 358.69 | 335.27 | 49.14  |
| GAIF01027620.1 | 0      | 0      | 0      | 0      | 0.12   | 0      |
| GAIF01027621.1 | 0.66   | 0.08   | 0      | 0.76   | 3.41   | 0.08   |
| GAIF01027622.1 | 2.62   | 1.53   | 0      | 6.79   | 10.31  | 2.36   |
| GAIF01027626.1 | 12.77  | 12.41  | 12.02  | 5.38   | 6.3    | 3.72   |
| GAIF01027627.1 | 0      | 0.05   | 0.1    | 0.26   | 1.17   | 0      |
| GAIF01027629.1 | 0      | 0.19   | 0.26   | 0.2    | 0.14   | 0      |
| GAIF01027630.1 | 0.2    | 0.72   | 0.29   | 1.55   | 2.96   | 0.15   |
| GAIF01027631.1 | 0.26   | 0      | 0      | 0      | 0      | 0      |
| GAIF01027632.1 | 0      | 0      | 0.14   | 0.3    | 0      | 0      |
| GAIF01027633.1 | 0      | 0      | 0.73   | 1.03   | 2.65   | 0.2    |
| GAIF01027634.1 | 145.65 | 66.44  | 73.29  | 101.03 | 108.02 | 44.96  |
| GAIF01027637.1 | 0.23   | 0.6    | 0.17   | 0      | 0.18   | 0      |
| GAIF01027638.1 | 3.47   | 8.89   | 4.67   | 7.17   | 0      | 0      |
| GAIF01027640.1 | 0      | 0      | 0      | 0.05   | 0.1    | 0      |
| GAIF01027641.1 | 59.94  | 31.17  | 31.64  | 74.49  | 62.64  | 109.19 |
| GAIF01027642.1 | 0.08   | 0.72   | 0.09   | 1.43   | 0.49   | 0.18   |
| GAIF01027643.1 | 0      | 18.99  | 28.17  | 0.14   | 0.29   | 1.96   |
| GAIF01027645.1 | 0      | 0      | 0.1    | 0.05   | 0      | 0      |
| GAIF01027647.1 | 0      | 0      | 0      | 0.69   | 1.48   | 0.04   |
| GAIF01027649.1 | 3.1    | 1.64   | 1.09   | 11.87  | 15.11  | 1.72   |
| GAIF01027650.1 | 0.13   | 0.21   | 0      | 0.06   | 0.89   | 0      |
| GAIF01027651.1 | 0      | 0.17   | 0      | 0      | 0      | 0      |
| GAIF01027652.1 | 0      | 0      | 0      | 0.66   | 2.11   | 0.08   |
| GAIF01027653.1 | 0.07   | 0      | 0      | 0      | 0.17   | 0      |
| GAIF01027656.1 | 0.25   | 0.4    | 0.38   | 0.74   | 4.57   | 0.14   |
| GAIF01027658.1 | 0      | 0.01   | 0      | 0      | 0.17   | 0      |
| GAIF01027662.1 | 1.84   | 2.08   | 2.52   | 0      | 0      | 0.08   |
| GAIF01027663.1 | 2.2    | 0.96   | 1.81   | 3.46   | 2.51   | 1.72   |
| GAIF01027664.1 | 154.98 | 238.17 | 254.37 | 159.51 | 139.66 | 79.93  |
| GAIF01027665.1 | 0.41   | 0      | 0.12   | 0      | 0      | 0      |
| GAIF01027666.1 | 0      | 0      | 0.02   | 0      | 0      | 0      |
| GAIF01027668.1 | 12.26  | 8.35   | 5.54   | 8.4    | 6.93   | 8.19   |
| GAIF01027669.1 | 0.91   | 0.45   | 0.98   | 0      | 1.4    | 0      |
| GAIF01027670.1 | 5.35   | 20.09  | 5.16   | 0.32   | 0.25   | 0.53   |
| GAIF01027671.1 | 7.82   | 6.65   | 8.15   | 16.77  | 10.93  | 6.17   |
| GAIF01027673.1 | 0      | 0      | 0      | 0      | 1.96   | 0      |
| GAIF01027674.1 | 0      | 0      | 0      | 0.05   | 0      | 0      |
| GAIF01027675.1 | 1.78   | 1.23   | 0.7    | 4.41   | 0      | 0.28   |
| GAIF01027678.1 | 0.04   | 0      | 0      | 0      | 0      | 0      |
| GAIF01027679.1 | 14.56  | 16.37  | 19.76  | 24.66  | 27.88  | 8.99   |
| GAIF01027681.1 | 0.13   | 0      | 0.16   | 0      | 1.25   | 2.33   |
| GAIF01027682.1 | 0      | 0      | 0      | 0      | 0.93   | 0      |

|                |        |        |        |        |        |        |
|----------------|--------|--------|--------|--------|--------|--------|
| GAIF01027683.1 | 23.35  | 13.97  | 22.24  | 27.58  | 3.4    | 47.64  |
| GAIF01027685.1 | 0.73   | 0.49   | 0.53   | 0.32   | 0.04   | 0.08   |
| GAIF01027686.1 | 11.86  | 8.44   | 8.21   | 17.37  | 8.83   | 7.78   |
| GAIF01027688.1 | 0.03   | 0      | 0      | 0.18   | 0.91   | 0      |
| GAIF01027690.1 | 3.75   | 6.91   | 6.44   | 3.9    | 4.16   | 0.74   |
| GAIF01027691.1 | 0.02   | 0      | 0.12   | 0.58   | 0      | 0      |
| GAIF01027692.1 | 111.74 | 46.33  | 45.74  | 28.61  | 0      | 61.21  |
| GAIF01027693.1 | 9.98   | 22.62  | 19.87  | 43.45  | 27.9   | 4.29   |
| GAIF01027696.1 | 0      | 0      | 0      | 0      | 0.16   | 0      |
| GAIF01027697.1 | 0      | 0      | 0      | 0.43   | 0.53   | 0      |
| GAIF01027699.1 | 0      | 0      | 0.1    | 1.88   | 2.41   | 0.1    |
| GAIF01027701.1 | 0      | 0      | 0      | 0.24   | 0.57   | 0      |
| GAIF01027702.1 | 0      | 0.07   | 0      | 0      | 0      | 0      |
| GAIF01027703.1 | 0.19   | 0.15   | 0      | 2.25   | 11.21  | 0.28   |
| GAIF01027705.1 | 18.72  | 17.59  | 19.89  | 46.01  | 25.73  | 8.33   |
| GAIF01027706.1 | 2.21   | 2.24   | 0.59   | 7.16   | 5.22   | 0.92   |
| GAIF01027707.1 | 6.6    | 8.39   | 8.8    | 9.77   | 5.22   | 5.24   |
| GAIF01027709.1 | 0      | 0      | 0      | 0.1    | 0.52   | 0.09   |
| GAIF01027710.1 | 64.55  | 84.88  | 39.86  | 20.33  | 53.37  | 4.45   |
| GAIF01027713.1 | 0      | 0      | 0.06   | 0      | 0      | 0      |
| GAIF01027714.1 | 0.34   | 0.17   | 0      | 0      | 0.81   | 0.36   |
| GAIF01027715.1 | 0.05   | 0      | 0      | 0      | 0.96   | 0      |
| GAIF01027716.1 | 8.77   | 3.62   | 3.86   | 15.24  | 21.03  | 11.16  |
| GAIF01027717.1 | 0      | 0      | 0      | 0.08   | 0      | 0      |
| GAIF01027718.1 | 4.86   | 11.56  | 0.99   | 16.67  | 36.86  | 0.75   |
| GAIF01027720.1 | 7.77   | 8.79   | 8.39   | 31.08  | 24.83  | 3.13   |
| GAIF01027722.1 | 4.04   | 6.78   | 5.83   | 7.37   | 4.72   | 0.38   |
| GAIF01027723.1 | 31     | 52.38  | 13.8   | 133.1  | 185.35 | 8.46   |
| GAIF01027724.1 | 0.53   | 0.48   | 0      | 1.13   | 2.76   | 0      |
| GAIF01027725.1 | 23.81  | 24.72  | 8.44   | 20.69  | 40.46  | 16.03  |
| GAIF01027726.1 | 1.84   | 0.33   | 0.78   | 1.42   | 1.97   | 0.34   |
| GAIF01027727.1 | 1.14   | 0.25   | 0.07   | 4.48   | 18.47  | 0.68   |
| GAIF01027728.1 | 3.83   | 3.33   | 4.2    | 1.78   | 0.46   | 1.27   |
| GAIF01027730.1 | 0.05   | 0      | 0      | 0.31   | 0.06   | 0      |
| GAIF01027731.1 | 0      | 0.27   | 0      | 1.63   | 5.84   | 0      |
| GAIF01027732.1 | 0.82   | 0.36   | 1.26   | 0.57   | 0      | 1.08   |
| GAIF01027733.1 | 0      | 0.01   | 0.23   | 0.31   | 0      | 0.08   |
| GAIF01027734.1 | 76.54  | 109.87 | 32.94  | 273.53 | 274.37 | 4.98   |
| GAIF01027735.1 | 0      | 0      | 0      | 0      | 0.59   | 0      |
| GAIF01027736.1 | 27.83  | 40.65  | 17.89  | 30.67  | 79.57  | 13.09  |
| GAIF01027737.1 | 8.19   | 16.17  | 13.1   | 2.41   | 2.9    | 1.54   |
| GAIF01027740.1 | 262.59 | 140.27 | 224.04 | 167.88 | 123.14 | 180.89 |
| GAIF01027741.1 | 2.4    | 0      | 1.14   | 0      | 0      | 0      |
| GAIF01027742.1 | 0.05   | 0      | 0      | 0.27   | 0      | 0      |

|                |        |         |         |         |        |        |
|----------------|--------|---------|---------|---------|--------|--------|
| GAIF01027744.1 | 0      | 0       | 0.04    | 0       | 0      | 0      |
| GAIF01027745.1 | 14.97  | 24.96   | 13.03   | 16.02   | 16.09  | 2.95   |
| GAIF01027747.1 | 0.09   | 0.1     | 0.29    | 0.11    | 0.4    | 0      |
| GAIF01027748.1 | 2.89   | 2.93    | 2.71    | 13.57   | 15.01  | 2      |
| GAIF01027749.1 | 0      | 0       | 0.06    | 0       | 0      | 0      |
| GAIF01027751.1 | 2013.3 | 2447.41 | 2762.56 | 1339.25 | 604.43 | 391.98 |
| GAIF01027753.1 | 0      | 0       | 0       | 0.16    | 0      | 0      |
| GAIF01027755.1 | 0.9    | 0       | 0       | 7.91    | 26.81  | 0.69   |
| GAIF01027758.1 | 1.42   | 1.97    | 0       | 2.55    | 1.27   | 0.89   |
| GAIF01027761.1 | 4.28   | 4.08    | 2.2     | 2.33    | 1.53   | 0.22   |
| GAIF01027762.1 | 1.03   | 0.22    | 0.6     | 1.12    | 2.24   | 0.53   |
| GAIF01027763.1 | 0.1    | 0.11    | 0       | 0.8     | 2.83   | 0      |
| GAIF01027764.1 | 5.32   | 5.24    | 1.91    | 3.37    | 1.7    | 0      |
| GAIF01027765.1 | 11.59  | 23.47   | 21.52   | 29      | 23.49  | 3.94   |
| GAIF01027767.1 | 0      | 0.12    | 0       | 0       | 0      | 0      |
| GAIF01027768.1 | 0      | 0       | 0       | 0.1     | 0.43   | 0.09   |
| GAIF01027769.1 | 23.48  | 18.76   | 11.13   | 53.91   | 34.79  | 9.5    |
| GAIF01027770.1 | 0      | 0.22    | 0.05    | 0.06    | 0      | 0      |
| GAIF01027771.1 | 0      | 0.21    | 0       | 0       | 0      | 0      |
| GAIF01027772.1 | 0      | 2.29    | 0.41    | 0       | 0      | 0      |
| GAIF01027773.1 | 1.74   | 0.18    | 0.27    | 0.19    | 0.9    | 0.27   |
| GAIF01027774.1 | 128.48 | 82.59   | 70.36   | 17.46   | 8.74   | 7.3    |
| GAIF01027775.1 | 0      | 0       | 0.04    | 0       | 0      | 0      |
| GAIF01027777.1 | 0      | 0       | 0       | 0       | 0.3    | 0      |
| GAIF01027778.1 | 0      | 0       | 0       | 0.53    | 0.26   | 0      |
| GAIF01027779.1 | 2.85   | 1.44    | 0.18    | 3.82    | 4.14   | 2.16   |
| GAIF01027780.1 | 0      | 0       | 0       | 0       | 0      | 0.19   |
| GAIF01027781.1 | 118.63 | 87.15   | 47.09   | 87.73   | 53.76  | 21.11  |
| GAIF01027782.1 | 0      | 0       | 0       | 0       | 0.07   | 0.07   |
| GAIF01027783.1 | 0      | 0       | 0       | 0       | 0.03   | 0      |
| GAIF01027784.1 | 0      | 0       | 0       | 0       | 1.94   | 0.18   |
| GAIF01027785.1 | 18.34  | 23.55   | 18.43   | 34.88   | 20.54  | 8.82   |
| GAIF01027786.1 | 0.39   | 0.12    | 0       | 1.04    | 2.02   | 0.12   |
| GAIF01027787.1 | 0      | 0.8     | 0       | 0       | 0.05   | 0      |
| GAIF01027788.1 | 2.99   | 4.57    | 0       | 5.83    | 6.42   | 0      |
| GAIF01027789.1 | 0      | 0       | 0       | 0       | 0.05   | 0      |
| GAIF01027790.1 | 60.45  | 24.48   | 24.4    | 83.93   | 372.41 | 33.24  |
| GAIF01027791.1 | 0      | 0.1     | 0       | 0       | 0.22   | 0      |
| GAIF01027793.1 | 0      | 0.05    | 0       | 0       | 0.06   | 0      |
| GAIF01027794.1 | 24.71  | 25.65   | 30.45   | 56.26   | 31.12  | 19.33  |
| GAIF01027795.1 | 0      | 0       | 0       | 1.53    | 11.34  | 0      |
| GAIF01027797.1 | 40.66  | 4.22    | 1.79    | 36.04   | 60.45  | 8.78   |
| GAIF01027799.1 | 0      | 0.05    | 0       | 0       | 0      | 0.81   |
| GAIF01027800.1 | 3.02   | 1.21    | 0.36    | 9.09    | 11.98  | 2.82   |

|                |        |        |        |        |        |       |
|----------------|--------|--------|--------|--------|--------|-------|
| GAIF01027801.1 | 0      | 0      | 0      | 0.43   | 0.66   | 0     |
| GAIF01027802.1 | 0.74   | 2.24   | 1.02   | 3.06   | 3.56   | 0.67  |
| GAIF01027803.1 | 9.14   | 7.08   | 4.98   | 2.67   | 1.14   | 1.3   |
| GAIF01027804.1 | 0      | 0.14   | 0      | 0      | 0      | 0     |
| GAIF01027805.1 | 0      | 0.07   | 0      | 0.52   | 2.01   | 0     |
| GAIF01027807.1 | 0.5    | 0.11   | 0      | 0      | 0      | 0     |
| GAIF01027808.1 | 0.03   | 0      | 0.03   | 0      | 0.17   | 0     |
| GAIF01027809.1 | 77.28  | 114.33 | 45.85  | 211.92 | 176.12 | 11.47 |
| GAIF01027810.1 | 4.37   | 0.44   | 0.45   | 13.46  | 31.5   | 6.01  |
| GAIF01027811.1 | 24.74  | 23.88  | 9.44   | 25.17  | 27.02  | 2.81  |
| GAIF01027814.1 | 1.31   | 0.74   | 0.18   | 5.07   | 14.09  | 0.54  |
| GAIF01027815.1 | 0.47   | 0      | 0.1    | 0.11   | 0.46   | 0.1   |
| GAIF01027818.1 | 0      | 0      | 0      | 0.86   | 0.87   | 0.34  |
| GAIF01027820.1 | 5.07   | 2.19   | 7.21   | 13.04  | 9.28   | 43.49 |
| GAIF01027821.1 | 0      | 0      | 0      | 0      | 0.66   | 0     |
| GAIF01027824.1 | 3.43   | 9.22   | 7.87   | 5.82   | 5.38   | 1.27  |
| GAIF01027825.1 | 0      | 0      | 0      | 0.16   | 0.17   | 0     |
| GAIF01027826.1 | 0      | 0      | 0      | 0.75   | 0      | 0     |
| GAIF01027827.1 | 0.44   | 0.32   | 0      | 0.17   | 0.18   | 0.16  |
| GAIF01027828.1 | 0      | 0.16   | 0      | 0.17   | 0      | 0.08  |
| GAIF01027829.1 | 0      | 0      | 0      | 0      | 0.12   | 0     |
| GAIF01027830.1 | 1.18   | 0.13   | 0      | 5.06   | 18.12  | 0.39  |
| GAIF01027831.1 | 5.4    | 8.08   | 7.69   | 11.06  | 10.47  | 2.41  |
| GAIF01027832.1 | 19.02  | 15.4   | 0      | 21.96  | 41.2   | 0     |
| GAIF01027833.1 | 0.06   | 0      | 0      | 0      | 0.07   | 0     |
| GAIF01027834.1 | 0      | 0      | 0      | 0.33   | 0      | 0     |
| GAIF01027835.1 | 19.78  | 25.13  | 11.84  | 56.74  | 23.61  | 4.8   |
| GAIF01027836.1 | 5.31   | 4.72   | 5.71   | 0.15   | 0.16   | 0.22  |
| GAIF01027837.1 | 0.13   | 0.43   | 0.15   | 1.85   | 4.31   | 0.29  |
| GAIF01027840.1 | 23.98  | 22.16  | 16.45  | 10.16  | 6.2    | 2.64  |
| GAIF01027841.1 | 0.42   | 0      | 0      | 1.58   | 3.15   | 0     |
| GAIF01027842.1 | 0      | 0      | 0      | 0      | 0.06   | 0     |
| GAIF01027843.1 | 0      | 0      | 0.12   | 0      | 0      | 0     |
| GAIF01027844.1 | 0.03   | 0      | 0      | 0      | 0      | 0.02  |
| GAIF01027845.1 | 0.57   | 0.39   | 0.16   | 0.08   | 0.09   | 0     |
| GAIF01027846.1 | 0      | 0      | 0      | 0.27   | 0.27   | 0     |
| GAIF01027848.1 | 21.42  | 19.08  | 24.27  | 23.1   | 15.44  | 11.13 |
| GAIF01027849.1 | 22.09  | 15.2   | 39.82  | 47.43  | 17.63  | 54.84 |
| GAIF01027850.1 | 393.87 | 394.97 | 406.09 | 133.77 | 149.13 | 91.34 |
| GAIF01027851.1 | 1.04   | 0.69   | 0      | 1.39   | 5.76   | 0.09  |
| GAIF01027852.1 | 1.38   | 0      | 0      | 0      | 0.65   | 0.5   |
| GAIF01027853.1 | 0      | 0      | 0      | 0      | 0.5    | 0     |
| GAIF01027856.1 | 12.71  | 13.79  | 19.22  | 26.21  | 23.22  | 19.85 |
| GAIF01027857.1 | 3.25   | 2.53   | 1.33   | 6.42   | 10.22  | 1.98  |

|                |         |        |        |         |         |         |
|----------------|---------|--------|--------|---------|---------|---------|
| GAIF01027858.1 | 0       | 0.3    | 0.41   | 0.11    | 0       | 0.21    |
| GAIF01027861.1 | 156.44  | 114.19 | 120.17 | 128.62  | 63.15   | 31.75   |
| GAIF01027862.1 | 0.71    | 0.4    | 0      | 8.75    | 31.23   | 0.87    |
| GAIF01027866.1 | 2122.83 | 673.2  | 740.9  | 1338.01 | 1800.15 | 5888.59 |
| GAIF01027870.1 | 2.55    | 15.37  | 0      | 26.57   | 11.16   | 7.61    |
| GAIF01027871.1 | 54.91   | 81.4   | 52.97  | 80.71   | 29.44   | 5.77    |
| GAIF01027873.1 | 0       | 0      | 0.07   | 1.06    | 5.53    | 0.06    |
| GAIF01027874.1 | 3.66    | 3.17   | 2.48   | 11.15   | 14.83   | 0.77    |
| GAIF01027876.1 | 0       | 0      | 0      | 0       | 0.64    | 0       |
| GAIF01027879.1 | 0       | 0.67   | 0.27   | 0       | 0       | 1.22    |
| GAIF01027880.1 | 0.33    | 0      | 0.35   | 0.24    | 1.63    | 0       |
| GAIF01027882.1 | 0       | 1.1    | 0.51   | 0       | 0       | 0.09    |
| GAIF01027883.1 | 21.37   | 31.79  | 25.45  | 79.66   | 71.74   | 12.3    |
| GAIF01027884.1 | 7.29    | 10.79  | 7.68   | 14.68   | 10.12   | 2.45    |
| GAIF01027885.1 | 1.8     | 1.03   | 0.29   | 2.68    | 3.69    | 0.47    |
| GAIF01027887.1 | 0.03    | 0.03   | 0.01   | 0.01    | 0       | 0.05    |
| GAIF01027888.1 | 3.52    | 1.41   | 0.09   | 13.65   | 33.73   | 1.05    |
| GAIF01027889.1 | 5.08    | 0.95   | 0.41   | 7.08    | 29.22   | 17.16   |
| GAIF01027892.1 | 31.37   | 48.91  | 21.41  | 154.61  | 70.08   | 16.09   |
| GAIF01027893.1 | 2.35    | 0.22   | 0.09   | 7.33    | 34.97   | 1.07    |
| GAIF01027894.1 | 0       | 0      | 0.07   | 0       | 0       | 0       |
| GAIF01027895.1 | 0       | 0      | 0      | 0.29    | 0.33    | 0       |
| GAIF01027896.1 | 100.68  | 74.94  | 62.25  | 179.24  | 175.43  | 37.79   |
| GAIF01027897.1 | 11.92   | 5.07   | 8.27   | 5.75    | 8.01    | 43.09   |
| GAIF01027898.1 | 0       | 0.07   | 0      | 0.39    | 2.93    | 0       |
| GAIF01027899.1 | 0.51    | 0.8    | 0.62   | 0.46    | 0.41    | 0.13    |
| GAIF01027900.1 | 0.31    | 0.06   | 0.17   | 2.96    | 19.34   | 1.13    |
| GAIF01027901.1 | 0.8     | 0.47   | 0.13   | 3.83    | 11.11   | 0.07    |
| GAIF01027902.1 | 0       | 0      | 0      | 0       | 0       | 0.3     |
| GAIF01027904.1 | 0       | 0      | 0      | 0.62    | 0.94    | 0.21    |
| GAIF01027905.1 | 0.27    | 0.03   | 0.07   | 0.21    | 1.51    | 0       |
| GAIF01027907.1 | 20.98   | 11.41  | 0      | 24.35   | 0       | 0       |
| GAIF01027908.1 | 0.46    | 1.68   | 0.17   | 2.69    | 0.74    | 0.68    |
| GAIF01027911.1 | 0       | 0.26   | 0      | 0.33    | 0       | 0       |
| GAIF01027912.1 | 274.08  | 78.44  | 65.04  | 383.7   | 468.71  | 313.35  |
| GAIF01027913.1 | 1.07    | 0      | 0.45   | 0.72    | 0       | 0.01    |
| GAIF01027914.1 | 16.46   | 24.23  | 10.65  | 6.15    | 3.21    | 0.12    |
| GAIF01027915.1 | 0       | 0      | 0      | 0.68    | 0.51    | 0       |
| GAIF01027916.1 | 36.66   | 77.69  | 71.96  | 105.48  | 95.08   | 25.92   |
| GAIF01027917.1 | 5.37    | 2.17   | 1.64   | 9.27    | 16.21   | 9.01    |
| GAIF01027918.1 | 0.69    | 0.75   | 0.25   | 8.91    | 30.19   | 0.25    |
| GAIF01027919.1 | 3.3     | 2.39   | 0.87   | 12.25   | 19.3    | 1.48    |
| GAIF01027920.1 | 0.15    | 0      | 0.09   | 0.28    | 4.78    | 0       |
| GAIF01027922.1 | 51.68   | 61.27  | 24     | 109.08  | 103.54  | 20.59   |

|                |        |         |         |         |        |         |
|----------------|--------|---------|---------|---------|--------|---------|
| GAIF01027923.1 | 8.15   | 6.55    | 5.75    | 16.36   | 32.37  | 19.98   |
| GAIF01027924.1 | 0.06   | 0.43    | 0       | 0.42    | 0.22   | 0       |
| GAIF01027925.1 | 11.14  | 28.91   | 20.21   | 33.51   | 35.67  | 4.13    |
| GAIF01027928.1 | 20.79  | 10.96   | 6.43    | 34.04   | 46.06  | 22.4    |
| GAIF01027929.1 | 3.27   | 2.66    | 1.65    | 4.2     | 8.24   | 2.08    |
| GAIF01027930.1 | 51.44  | 27.81   | 40.75   | 84.69   | 82.41  | 147.54  |
| GAIF01027931.1 | 0.38   | 0.05    | 0.09    | 0.73    | 0.22   | 0.37    |
| GAIF01027932.1 | 0      | 0       | 0       | 0.11    | 0.11   | 0       |
| GAIF01027933.1 | 0      | 0       | 0       | 0.32    | 0      | 0       |
| GAIF01027934.1 | 0      | 0.09    | 0       | 0.37    | 0.77   | 0       |
| GAIF01027935.1 | 0      | 0       | 0       | 0.73    | 0.15   | 0       |
| GAIF01027937.1 | 7.83   | 17.16   | 8.37    | 33.4    | 29.77  | 1.9     |
| GAIF01027938.1 | 0.89   | 1.11    | 0       | 3.78    | 7.92   | 0       |
| GAIF01027940.1 | 0      | 0.05    | 0       | 0       | 0      | 0       |
| GAIF01027941.1 | 0.03   | 0       | 0       | 0.05    | 0.08   | 0       |
| GAIF01027943.1 | 7.8    | 0.63    | 1.35    | 2.38    | 0.3    | 0       |
| GAIF01027944.1 | 0.08   | 0       | 0       | 0.1     | 0.1    | 0       |
| GAIF01027945.1 | 0      | 0.25    | 0       | 0.78    | 2.85   | 0.05    |
| GAIF01027946.1 | 0      | 0       | 0       | 0.73    | 0      | 0.61    |
| GAIF01027947.1 | 12.77  | 15.46   | 4.34    | 31.73   | 40.68  | 2.15    |
| GAIF01027949.1 | 0.07   | 0       | 0       | 0       | 0.08   | 0       |
| GAIF01027950.1 | 0.04   | 0.14    | 0       | 0.3     | 0.05   | 0       |
| GAIF01027951.1 | 9.31   | 7.36    | 14.67   | 13.1    | 10.18  | 10.78   |
| GAIF01027952.1 | 0      | 2.28    | 1.07    | 0.22    | 2.59   | 0       |
| GAIF01027953.1 | 0.39   | 0.23    | 0.09    | 1.4     | 5.06   | 0.24    |
| GAIF01027954.1 | 0      | 0.05    | 0       | 0       | 0      | 0       |
| GAIF01027955.1 | 14.05  | 16.27   | 10.54   | 30.08   | 24.88  | 5.67    |
| GAIF01027956.1 | 37.34  | 26.35   | 22.8    | 46.62   | 28.63  | 5.43    |
| GAIF01027959.1 | 0.92   | 1.17    | 1.21    | 0.86    | 0.36   | 0.69    |
| GAIF01027960.1 | 3560.4 | 3751.91 | 6300.93 | 1758.56 | 1451.2 | 5768.97 |
| GAIF01027962.1 | 0      | 0       | 0       | 0       | 0.08   | 0       |
| GAIF01027963.1 | 4.67   | 3.79    | 5.35    | 24.17   | 21.9   | 17.58   |
| GAIF01027966.1 | 0      | 0       | 0.14    | 0.15    | 0      | 0       |
| GAIF01027967.1 | 26.65  | 28.22   | 23      | 49.81   | 55.14  | 19.52   |
| GAIF01027968.1 | 13.86  | 14.23   | 9.82    | 24.93   | 34.23  | 24.99   |
| GAIF01027969.1 | 0      | 0       | 0       | 0       | 0.26   | 0       |
| GAIF01027970.1 | 30.33  | 33.46   | 17.63   | 89.73   | 36.03  | 6.55    |
| GAIF01027972.1 | 1.08   | 0.51    | 0       | 2.7     | 13.23  | 0.85    |
| GAIF01027974.1 | 1.24   | 8.44    | 6.19    | 4.13    | 2.44   | 1.04    |
| GAIF01027975.1 | 16.95  | 19.06   | 11.48   | 33.5    | 16.77  | 5.76    |
| GAIF01027976.1 | 0.05   | 0       | 0       | 0.49    | 0.71   | 0       |
| GAIF01027977.1 | 43.49  | 54.79   | 68.16   | 43.36   | 29.44  | 29.02   |
| GAIF01027978.1 | 0.38   | 0       | 0       | 0.29    | 0.98   | 0       |
| GAIF01027979.1 | 7.59   | 1.56    | 0.24    | 19.41   | 64.16  | 12.86   |



|                |        |        |        |        |        |         |
|----------------|--------|--------|--------|--------|--------|---------|
| GAIF01027981.1 | 4.39   | 1      | 5.13   | 0.57   | 0.6    | 1.56    |
| GAIF01027982.1 | 0.11   | 0      | 0      | 0      | 0      | 0       |
| GAIF01027983.1 | 5.77   | 4.42   | 1.36   | 20.37  | 30.74  | 4.48    |
| GAIF01027984.1 | 0.41   | 0.54   | 0.88   | 0.36   | 0.57   | 0.05    |
| GAIF01027985.1 | 0      | 0      | 0      | 0      | 0.22   | 0       |
| GAIF01027986.1 | 3.8    | 0.22   | 0.44   | 3.94   | 20.18  | 6.83    |
| GAIF01027987.1 | 407.48 | 215.78 | 375.13 | 486.96 | 373.59 | 3116.81 |
| GAIF01027989.1 | 4.34   | 2.02   | 1.36   | 11.15  | 8.45   | 2.39    |
| GAIF01027992.1 | 50.42  | 49.36  | 20.79  | 75.45  | 52.36  | 18.62   |
| GAIF01027993.1 | 0.45   | 0.2    | 0.49   | 0.99   | 2.27   | 0.25    |
| GAIF01027994.1 | 22.52  | 9.12   | 8.81   | 32.34  | 32.73  | 69.63   |
| GAIF01027995.1 | 0.58   | 2.15   | 0.26   | 1.48   | 10.9   | 0       |
| GAIF01027996.1 | 9.81   | 7.55   | 15.55  | 29.81  | 15.84  | 12.64   |
| GAIF01027999.1 | 2.43   | 0.97   | 0.21   | 7.06   | 16.62  | 0.56    |
| GAIF01028001.1 | 0      | 0      | 0      | 0      | 0.12   | 0       |
| GAIF01028002.1 | 0.11   | 0.12   | 0.12   | 0.38   | 1.43   | 0       |
| GAIF01028003.1 | 17.85  | 29.09  | 22.04  | 31.46  | 18.94  | 5.76    |
| GAIF01028004.1 | 0      | 0      | 0      | 0.98   | 2.68   | 0       |
| GAIF01028007.1 | 0      | 0      | 0.03   | 0      | 0.03   | 0       |
| GAIF01028010.1 | 0      | 0      | 0      | 1.47   | 1.07   | 0.14    |
| GAIF01028011.1 | 0.05   | 0      | 0.23   | 2.27   | 8.11   | 0.06    |
| GAIF01028012.1 | 0.28   | 0      | 0      | 0      | 0.45   | 0.31    |
| GAIF01028014.1 | 0.01   | 0      | 0.01   | 0      | 0      | 0       |
| GAIF01028016.1 | 0.08   | 0      | 0      | 0      | 0      | 0       |
| GAIF01028017.1 | 0.02   | 0.04   | 0      | 0.05   | 0.07   | 0       |
| GAIF01028018.1 | 0.06   | 0      | 0      | 0.03   | 0.08   | 0       |
| GAIF01028019.1 | 15.85  | 3.62   | 12.19  | 8.08   | 4.01   | 7.34    |
| GAIF01028020.1 | 0.04   | 0      | 0.05   | 0.1    | 0.05   | 0       |
| GAIF01028021.1 | 12.33  | 9.06   | 27.43  | 8.46   | 0.33   | 4.16    |
| GAIF01028022.1 | 0.03   | 0.15   | 0      | 0.04   | 0      | 0       |
| GAIF01028023.1 | 0.06   | 0.1    | 0.03   | 0.81   | 7.51   | 0.31    |
| GAIF01028026.1 | 0      | 10.69  | 16.63  | 0      | 7.88   | 10.84   |
| GAIF01028027.1 | 0.58   | 0.16   | 0      | 0.67   | 5.52   | 0       |
| GAIF01028028.1 | 0      | 0      | 0      | 0      | 0.07   | 0       |
| GAIF01028029.1 | 0.12   | 0      | 0      | 0.02   | 0.35   | 0       |
| GAIF01028030.1 | 0.06   | 0.03   | 0.03   | 0.26   | 1.54   | 0.09    |
| GAIF01028031.1 | 13.78  | 8.72   | 7.9    | 20.08  | 21.01  | 10.08   |
| GAIF01028032.1 | 109.54 | 141.65 | 210.7  | 131.65 | 96.25  | 37.44   |
| GAIF01028034.1 | 0.39   | 0.22   | 0.17   | 0      | 7.32   | 0.37    |
| GAIF01028039.1 | 0      | 0.03   | 0      | 0.03   | 0.34   | 0       |
| GAIF01028040.1 | 0.83   | 0.9    | 0      | 0.12   | 0.25   | 0       |
| GAIF01028041.1 | 0      | 0      | 0      | 0      | 0.07   | 0       |
| GAIF01028042.1 | 7.15   | 5      | 3.19   | 11.11  | 15.02  | 2.49    |
| GAIF01028043.1 | 1.2    | 0      | 0      | 0      | 0      | 0       |

|                |         |         |         |         |         |         |
|----------------|---------|---------|---------|---------|---------|---------|
| GAIF01028044.1 | 0       | 0       | 0       | 0.03    | 0.18    | 0       |
| GAIF01028045.1 | 605.05  | 544.69  | 274.68  | 475.08  | 928.55  | 245.67  |
| GAIF01028047.1 | 0       | 0.13    | 0       | 0.14    | 0.3     | 0       |
| GAIF01028048.1 | 0       | 0       | 0       | 0       | 0.52    | 0       |
| GAIF01028049.1 | 78.61   | 79.17   | 45      | 7.34    | 8.41    | 15.71   |
| GAIF01028050.1 | 0       | 0       | 0.76    | 0       | 0       | 0       |
| GAIF01028051.1 | 2.97    | 4.28    | 1.22    | 0.27    | 0.14    | 0       |
| GAIF01028052.1 | 2.24    | 6.89    | 4.2     | 0.61    | 0.32    | 0.15    |
| GAIF01028053.1 | 72.03   | 31.59   | 42.37   | 12.03   | 17.54   | 10.02   |
| GAIF01028054.1 | 0.84    | 0.83    | 0.08    | 6.71    | 13.08   | 0.34    |
| GAIF01028055.1 | 10.37   | 19.7    | 23.23   | 2.98    | 2.06    | 0.85    |
| GAIF01028056.1 | 2107.51 | 1864.68 | 4651.18 | 737.87  | 396.57  | 1456.14 |
| GAIF01028060.1 | 1.12    | 1.3     | 1.59    | 2.25    | 3.23    | 1.33    |
| GAIF01028061.1 | 3.68    | 0       | 0       | 0       | 4.04    | 5.93    |
| GAIF01028062.1 | 0       | 2.1     | 1.77    | 0       | 0       | 0.06    |
| GAIF01028063.1 | 35.88   | 44.65   | 36.51   | 41.19   | 20.59   | 10.77   |
| GAIF01028064.1 | 6.1     | 10.15   | 5.07    | 25.77   | 20.45   | 2.86    |
| GAIF01028066.1 | 0.23    | 0.39    | 0.27    | 0.23    | 0.15    | 0.07    |
| GAIF01028068.1 | 50.57   | 62.24   | 35.96   | 54.29   | 50.78   | 15.32   |
| GAIF01028069.1 | 8.56    | 8.7     | 10.96   | 13.91   | 18.78   | 8.57    |
| GAIF01028070.1 | 0       | 0       | 0       | 0.18    | 0       | 0       |
| GAIF01028071.1 | 0       | 0.34    | 0       | 0       | 0       | 0       |
| GAIF01028073.1 | 0       | 0.36    | 0       | 0       | 0.4     | 0       |
| GAIF01028075.1 | 26.41   | 21.92   | 31.04   | 46.69   | 21.17   | 23.25   |
| GAIF01028079.1 | 2344.69 | 1114.46 | 1732.63 | 1489.85 | 1811.49 | 7087.78 |
| GAIF01028080.1 | 0       | 0.12    | 0       | 0       | 0.2     | 0       |
| GAIF01028082.1 | 0.61    | 0.65    | 0.69    | 0.69    | 1.33    | 0.27    |
| GAIF01028084.1 | 18.43   | 23.11   | 17.8    | 96.25   | 85.76   | 5.06    |
| GAIF01028085.1 | 9.1     | 19.83   | 13.31   | 18.02   | 16.1    | 4.85    |
| GAIF01028086.1 | 33.07   | 42.74   | 15.88   | 171.43  | 181.07  | 35.45   |
| GAIF01028087.1 | 176.06  | 59.84   | 164.36  | 194.12  | 106.12  | 105.58  |
| GAIF01028089.1 | 31.13   | 60.58   | 34.55   | 75.23   | 67.83   | 18.13   |
| GAIF01028090.1 | 81.58   | 84.04   | 226.11  | 33.1    | 12.27   | 102.55  |
| GAIF01028091.1 | 0       | 0       | 0       | 0       | 0.84    | 0       |
| GAIF01028092.1 | 0.27    | 0.79    | 0.4     | 5.56    | 16.73   | 0.2     |
| GAIF01028094.1 | 0       | 0       | 0       | 0.05    | 0.16    | 0       |
| GAIF01028096.1 | 0.06    | 0.06    | 0       | 0.38    | 2.66    | 0.3     |
| GAIF01028097.1 | 0       | 0       | 0       | 0.08    | 0       | 0       |
| GAIF01028098.1 | 10.68   | 9.36    | 0       | 10.26   | 17.18   | 14.09   |
| GAIF01028099.1 | 0.27    | 0       | 0.18    | 0       | 0       | 0       |
| GAIF01028100.1 | 0.63    | 0.27    | 0.14    | 1.31    | 0.6     | 0.14    |
| GAIF01028101.1 | 1.84    | 0.19    | 0.38    | 0.31    | 4.53    | 0.68    |
| GAIF01028102.1 | 13.79   | 6.29    | 5.14    | 26.27   | 22.82   | 8.58    |
| GAIF01028103.1 | 12.68   | 21.45   | 5.94    | 28.53   | 45.35   | 13.98   |

|                |        |        |        |        |        |        |
|----------------|--------|--------|--------|--------|--------|--------|
| GAIF01028105.1 | 0      | 0      | 0      | 0      | 1.68   | 0      |
| GAIF01028107.1 | 11.37  | 11.44  | 10.18  | 25.41  | 44.33  | 6.16   |
| GAIF01028108.1 | 3.31   | 4.49   | 3.4    | 14.67  | 16.99  | 2.22   |
| GAIF01028109.1 | 0.33   | 0.52   | 0      | 0.18   | 0.65   | 0      |
| GAIF01028110.1 | 0      | 0      | 0      | 0.65   | 1.89   | 0.28   |
| GAIF01028112.1 | 0.43   | 0.13   | 0.27   | 0.21   | 0.67   | 0      |
| GAIF01028113.1 | 0.06   | 0      | 0      | 0.07   | 0      | 0      |
| GAIF01028114.1 | 0.22   | 0      | 0      | 0.38   | 0.91   | 0.89   |
| GAIF01028115.1 | 0      | 0      | 0      | 0      | 0      | 0.24   |
| GAIF01028116.1 | 0      | 0      | 0      | 0      | 4.22   | 0      |
| GAIF01028118.1 | 8.02   | 9.13   | 5.56   | 3.77   | 3.05   | 0.47   |
| GAIF01028120.1 | 32.71  | 31.74  | 49.49  | 46.58  | 18.41  | 34.8   |
| GAIF01028122.1 | 223.82 | 240.89 | 687.53 | 49.8   | 52.6   | 325.45 |
| GAIF01028123.1 | 0      | 0      | 0      | 0      | 0.19   | 0      |
| GAIF01028125.1 | 0      | 0      | 0      | 0      | 0      | 0.04   |
| GAIF01028126.1 | 1.78   | 1.8    | 0.42   | 2.22   | 2.76   | 0.7    |
| GAIF01028127.1 | 3.29   | 2.73   | 2.1    | 0.91   | 0.6    | 0      |
| GAIF01028133.1 | 0.04   | 0.04   | 0.08   | 0.73   | 2.45   | 0.04   |
| GAIF01028134.1 | 0      | 0      | 0      | 0.13   | 0      | 0      |
| GAIF01028135.1 | 23.29  | 6.31   | 6.37   | 3.05   | 3.32   | 11.34  |
| GAIF01028136.1 | 0      | 0.16   | 0      | 0      | 0      | 0      |
| GAIF01028137.1 | 0      | 0      | 0      | 0      | 1.13   | 0      |
| GAIF01028141.1 | 0.02   | 0.03   | 0.03   | 0.01   | 0.03   | 0.03   |
| GAIF01028142.1 | 0.12   | 0.03   | 0.02   | 0      | 1.13   | 0      |
| GAIF01028147.1 | 42.91  | 24.68  | 18.23  | 138.12 | 211.93 | 182.72 |
| GAIF01028148.1 | 0      | 0      | 0      | 0      | 0      | 0.2    |
| GAIF01028149.1 | 99.26  | 169.56 | 260.76 | 581.91 | 414.28 | 137.33 |
| GAIF01028150.1 | 0.15   | 0.05   | 0      | 0      | 0      | 0      |
| GAIF01028151.1 | 0      | 0      | 0      | 0      | 0.39   | 0      |
| GAIF01028152.1 | 1.61   | 2.1    | 0.35   | 6.91   | 6.39   | 0.71   |
| GAIF01028153.1 | 749.97 | 638.86 | 637.87 | 84.79  | 1.18   | 38.33  |
| GAIF01028154.1 | 0.25   | 0.07   | 0.2    | 1.22   | 4.69   | 0.41   |
| GAIF01028155.1 | 71.13  | 11.66  | 5.04   | 5.67   | 4.5    | 1.76   |
| GAIF01028158.1 | 0.14   | 0.22   | 0      | 0      | 0.09   | 0.52   |
| GAIF01028159.1 | 23.81  | 20.87  | 17.02  | 3.59   | 1.4    | 0.39   |
| GAIF01028164.1 | 0      | 0      | 0      | 0      | 0.39   | 0      |
| GAIF01028165.1 | 0      | 0      | 0      | 0      | 2.06   | 0      |
| GAIF01028166.1 | 0.77   | 5.89   | 1.14   | 36.05  | 91.02  | 1.57   |
| GAIF01028168.1 | 2.12   | 1.35   | 0.15   | 2.98   | 0.43   | 0.11   |
| GAIF01028169.1 | 1.13   | 1.58   | 0      | 1.54   | 0.72   | 0.22   |
| GAIF01028170.1 | 0.42   | 0.58   | 0.12   | 0      | 0      | 0      |
| GAIF01028172.1 | 0      | 0.08   | 0      | 0      | 0      | 0      |
| GAIF01028173.1 | 0      | 0      | 0      | 0      | 0.05   | 0      |
| GAIF01028174.1 | 0      | 0      | 0      | 0.31   | 0      | 0      |

|                |        |        |        |        |        |         |
|----------------|--------|--------|--------|--------|--------|---------|
| GAIF01028175.1 | 1.68   | 0      | 1.59   | 0.78   | 0.31   | 2.04    |
| GAIF01028177.1 | 0.32   | 0.07   | 0.49   | 0      | 0      | 0       |
| GAIF01028179.1 | 0      | 0.87   | 0.75   | 0      | 0      | 0.21    |
| GAIF01028180.1 | 0.37   | 0.13   | 0.14   | 1.28   | 8.86   | 0.27    |
| GAIF01028181.1 | 0.08   | 0      | 0      | 0      | 0      | 0       |
| GAIF01028182.1 | 10.82  | 7.16   | 7.07   | 4.97   | 2.6    | 1.72    |
| GAIF01028183.1 | 0.32   | 0      | 0      | 0      | 0      | 0       |
| GAIF01028184.1 | 0      | 0.04   | 0.04   | 0      | 0.03   | 0       |
| GAIF01028186.1 | 3      | 7.39   | 0.44   | 26.46  | 51.95  | 0.33    |
| GAIF01028188.1 | 0.82   | 0.23   | 0.08   | 2.24   | 30.78  | 1.67    |
| GAIF01028189.1 | 64.43  | 62.53  | 16.41  | 214.06 | 229.93 | 27.71   |
| GAIF01028190.1 | 0.39   | 0.11   | 0.05   | 1.01   | 4.1    | 0.19    |
| GAIF01028191.1 | 21.28  | 35.69  | 27.78  | 28.84  | 11.94  | 7.29    |
| GAIF01028192.1 | 0.22   | 0      | 0.2    | 0      | 2.84   | 0       |
| GAIF01028194.1 | 0      | 0      | 0      | 0.49   | 1.39   | 0.08    |
| GAIF01028195.1 | 0      | 0.62   | 0.21   | 0      | 0      | 0       |
| GAIF01028196.1 | 0.7    | 0.42   | 0.23   | 0.62   | 0      | 0.09    |
| GAIF01028197.1 | 831.22 | 259.34 | 450.19 | 553.08 | 951.48 | 5996.96 |
| GAIF01028198.1 | 0.16   | 0.06   | 0      | 0      | 0      | 0       |
| GAIF01028201.1 | 12.02  | 5.5    | 9.37   | 0.61   | 0.38   | 1.16    |
| GAIF01028202.1 | 2.24   | 1.86   | 1.15   | 8.39   | 12.73  | 0.66    |
| GAIF01028203.1 | 3.84   | 3.19   | 0.49   | 8.86   | 6.96   | 0.02    |
| GAIF01028204.1 | 0      | 0.87   | 0      | 0      | 3.25   | 1.17    |
| GAIF01028207.1 | 0      | 0.05   | 0      | 0      | 0      | 0       |
| GAIF01028209.1 | 0      | 0      | 0      | 0.46   | 1.9    | 0.11    |
| GAIF01028210.1 | 8.23   | 11.5   | 0.65   | 15.86  | 12.01  | 0.52    |
| GAIF01028211.1 | 0.22   | 0.18   | 0      | 0      | 0      | 0.06    |
| GAIF01028212.1 | 5.46   | 4.7    | 5.9    | 19.4   | 34.06  | 8.02    |
| GAIF01028213.1 | 0.07   | 0.16   | 0.08   | 0.51   | 0.53   | 0       |
| GAIF01028214.1 | 0      | 0.06   | 1.14   | 0      | 0      | 1.13    |
| GAIF01028215.1 | 7.91   | 5.62   | 9.21   | 28.64  | 43.37  | 11.13   |
| GAIF01028217.1 | 0      | 0      | 0      | 0.18   | 0.35   | 0       |
| GAIF01028218.1 | 0      | 0.08   | 0      | 0      | 0.18   | 0       |
| GAIF01028219.1 | 0.22   | 0.28   | 0      | 0.04   | 2.92   | 0.47    |
| GAIF01028220.1 | 0      | 0      | 0      | 0      | 0.08   | 0       |
| GAIF01028221.1 | 14.45  | 16.89  | 15.04  | 26.99  | 14.98  | 5.4     |
| GAIF01028222.1 | 2.73   | 1.79   | 0.59   | 4.29   | 8.9    | 1.76    |
| GAIF01028223.1 | 0.81   | 0.72   | 0.1    | 1.53   | 1.18   | 0.16    |
| GAIF01028224.1 | 53.28  | 90.03  | 52.34  | 195.93 | 224.02 | 28.96   |
| GAIF01028225.1 | 0.09   | 0      | 0.1    | 3.77   | 18.26  | 0.1     |
| GAIF01028226.1 | 0      | 0      | 0      | 0.01   | 0.06   | 0       |
| GAIF01028227.1 | 0.65   | 0.45   | 0.13   | 2.81   | 5.4    | 0.13    |
| GAIF01028229.1 | 0.32   | 1.05   | 0      | 0      | 0      | 0       |
| GAIF01028230.1 | 38.68  | 45.23  | 31.08  | 49.15  | 40.63  | 9.12    |

|                |         |         |          |         |         |         |
|----------------|---------|---------|----------|---------|---------|---------|
| GAIF01028233.1 | 2.38    | 1.49    | 0.28     | 12.74   | 56.9    | 0.22    |
| GAIF01028234.1 | 8.52    | 19.92   | 21.97    | 19.66   | 11.2    | 6.66    |
| GAIF01028235.1 | 0       | 0       | 0        | 0       | 0.09    | 0       |
| GAIF01028236.1 | 0       | 0       | 0        | 0       | 0.15    | 0       |
| GAIF01028239.1 | 0.12    | 0.2     | 0.13     | 0       | 0       | 0.13    |
| GAIF01028240.1 | 1.02    | 0.41    | 0        | 3.84    | 13.91   | 3.5     |
| GAIF01028241.1 | 0       | 0.1     | 0        | 0       | 0       | 0.15    |
| GAIF01028243.1 | 0       | 1.01    | 0.96     | 0       | 0.19    | 0.06    |
| GAIF01028245.1 | 0       | 0       | 0.12     | 0       | 0.26    | 0       |
| GAIF01028247.1 | 2.66    | 0.8     | 0.41     | 7.37    | 14.2    | 1.46    |
| GAIF01028248.1 | 82.05   | 96.01   | 94.79    | 180.92  | 129.02  | 43.23   |
| GAIF01028249.1 | 0       | 0.25    | 0        | 3.52    | 11.8    | 0       |
| GAIF01028250.1 | 0       | 0       | 0        | 0.11    | 0.14    | 0.07    |
| GAIF01028253.1 | 0       | 17.3    | 11.79    | 0       | 0.39    | 1.07    |
| GAIF01028254.1 | 0       | 0       | 0.09     | 0       | 0       | 0       |
| GAIF01028255.1 | 48.23   | 55.39   | 35.93    | 184.19  | 114.82  | 19.77   |
| GAIF01028256.1 | 4950.56 | 6159.78 | 10957.84 | 3299.88 | 2629.92 | 9905.74 |
| GAIF01028258.1 | 9.1     | 2.24    | 1.19     | 9.66    | 8.8     | 1.72    |
| GAIF01028259.1 | 0       | 0.06    | 0        | 0       | 0.09    | 0       |
| GAIF01028261.1 | 0.38    | 0.29    | 0.16     | 0.9     | 1.15    | 0       |
| GAIF01028262.1 | 0.12    | 0.04    | 0        | 0.32    | 0.38    | 0       |
| GAIF01028263.1 | 4.78    | 2.5     | 3.71     | 18.32   | 29.4    | 12.66   |
| GAIF01028264.1 | 0       | 0.07    | 0.57     | 0.07    | 0       | 0       |
| GAIF01028266.1 | 91.81   | 34.42   | 16.38    | 116.91  | 68.29   | 7.85    |
| GAIF01028267.1 | 1.47    | 1.94    | 3.98     | 5.94    | 3.61    | 2.89    |
| GAIF01028268.1 | 0       | 0       | 0        | 0.48    | 2.15    | 0       |
| GAIF01028270.1 | 0.69    | 0.15    | 0.69     | 3.46    | 5.93    | 13.62   |
| GAIF01028271.1 | 0.1     | 0.11    | 0        | 0       | 0.12    | 0       |
| GAIF01028273.1 | 2.11    | 2.33    | 1.84     | 2.05    | 1.83    | 1.6     |
| GAIF01028274.1 | 0.59    | 0       | 0.08     | 1.29    | 3.43    | 2.92    |
| GAIF01028275.1 | 0.01    | 0       | 0.01     | 0.06    | 0       | 0       |
| GAIF01028276.1 | 0.72    | 0.39    | 0.31     | 2.5     | 6.38    | 1.66    |
| GAIF01028279.1 | 0.29    | 0       | 0        | 1.58    | 0       | 0.47    |
| GAIF01028283.1 | 0.14    | 0       | 0        | 0       | 0.08    | 0       |
| GAIF01028284.1 | 0       | 0       | 0        | 0       | 0.1     | 0       |
| GAIF01028285.1 | 47.46   | 21.43   | 18.99    | 31.14   | 12.4    | 17.97   |
| GAIF01028286.1 | 0       | 0       | 0        | 0       | 1.84    | 0       |
| GAIF01028288.1 | 3.12    | 1.86    | 1.03     | 14.08   | 94.91   | 4.71    |
| GAIF01028290.1 | 0.07    | 0.03    | 0.05     | 0.75    | 0       | 0.09    |
| GAIF01028292.1 | 20.35   | 38.28   | 13.56    | 12.35   | 15.47   | 2.96    |
| GAIF01028294.1 | 4.8     | 13.57   | 9.08     | 26.37   | 17.84   | 4.97    |
| GAIF01028295.1 | 1.4     | 0.17    | 0        | 11.76   | 50.8    | 0.34    |
| GAIF01028296.1 | 9.17    | 12.83   | 6.59     | 28.2    | 38.27   | 4.31    |
| GAIF01028297.1 | 0       | 0       | 0        | 0       | 0.16    | 0       |

|                |        |        |       |        |       |        |
|----------------|--------|--------|-------|--------|-------|--------|
| GAIF01028299.1 | 44.98  | 43.68  | 41.25 | 126.36 | 74.2  | 52.59  |
| GAIF01028300.1 | 8.07   | 0.74   | 0.53  | 2.38   | 1.06  | 0.22   |
| GAIF01028301.1 | 0      | 0.24   | 0.41  | 0.7    | 1.27  | 0      |
| GAIF01028303.1 | 7.16   | 8.03   | 9.77  | 15.9   | 4.41  | 10.48  |
| GAIF01028304.1 | 0      | 0      | 0     | 0      | 0     | 0.3    |
| GAIF01028305.1 | 0.12   | 0.19   | 0     | 0      | 0.28  | 0      |
| GAIF01028306.1 | 0      | 0      | 0     | 0.09   | 0     | 0      |
| GAIF01028307.1 | 3.86   | 0.23   | 0.47  | 0.5    | 1.81  | 0.47   |
| GAIF01028308.1 | 12.9   | 10.04  | 10.98 | 12.02  | 8.68  | 8.22   |
| GAIF01028311.1 | 0      | 0.15   | 0     | 1.27   | 1.95  | 0.15   |
| GAIF01028312.1 | 2.11   | 1.93   | 0.46  | 22.72  | 54.7  | 2.79   |
| GAIF01028313.1 | 1.16   | 0.93   | 0     | 6.38   | 17.97 | 1.19   |
| GAIF01028316.1 | 0.43   | 0.47   | 0.39  | 1.04   | 3.71  | 0.65   |
| GAIF01028317.1 | 1.16   | 0      | 0     | 0      | 0     | 0      |
| GAIF01028318.1 | 0.07   | 0      | 0.07  | 0.3    | 0.94  | 0      |
| GAIF01028322.1 | 0.58   | 0      | 0     | 0.67   | 0.22  | 0.63   |
| GAIF01028323.1 | 33.28  | 29.73  | 51.62 | 68.51  | 42.63 | 37.63  |
| GAIF01028324.1 | 1.82   | 0.85   | 0.14  | 0.15   | 0.47  | 0      |
| GAIF01028325.1 | 0      | 0      | 0     | 0      | 0.04  | 0      |
| GAIF01028326.1 | 0.81   | 1.05   | 1.18  | 0.71   | 0.13  | 0.25   |
| GAIF01028327.1 | 66     | 272.52 | 95.17 | 19.69  | 25    | 2.32   |
| GAIF01028328.1 | 0.23   | 0      | 0     | 0.18   | 0.46  | 0      |
| GAIF01028329.1 | 0.15   | 0.08   | 0     | 0      | 1.2   | 0      |
| GAIF01028330.1 | 0.13   | 0      | 0     | 0      | 0.9   | 0      |
| GAIF01028331.1 | 0.44   | 0      | 0.48  | 2.03   | 4.2   | 0.96   |
| GAIF01028333.1 | 99.5   | 80.14  | 60.83 | 20.01  | 8.23  | 3.34   |
| GAIF01028334.1 | 0      | 0      | 0     | 0.05   | 0     | 0      |
| GAIF01028335.1 | 4.93   | 3.66   | 3.44  | 4.11   | 8.37  | 2.81   |
| GAIF01028339.1 | 0      | 1.84   | 0     | 0      | 0     | 0      |
| GAIF01028340.1 | 2.12   | 2.15   | 3.64  | 5.37   | 5.35  | 0.38   |
| GAIF01028341.1 | 0      | 0      | 0     | 0      | 0.11  | 0      |
| GAIF01028342.1 | 0.34   | 0      | 0     | 0      | 0     | 0.09   |
| GAIF01028343.1 | 0      | 0      | 0     | 0.05   | 0     | 0      |
| GAIF01028344.1 | 0      | 0.18   | 0.25  | 0      | 0.1   | 0      |
| GAIF01028345.1 | 116.5  | 60.04  | 65.31 | 176.72 | 77.39 | 215.12 |
| GAIF01028346.1 | 0.06   | 0.03   | 0     | 0.07   | 0.27  | 0      |
| GAIF01028347.1 | 0      | 0.06   | 0     | 0      | 0     | 0      |
| GAIF01028348.1 | 0.04   | 0      | 0     | 0      | 0     | 0      |
| GAIF01028349.1 | 0      | 0.05   | 0     | 0      | 0.06  | 0.22   |
| GAIF01028353.1 | 0      | 0.47   | 2.01  | 0      | 0     | 0.48   |
| GAIF01028354.1 | 0.02   | 0.12   | 0.08  | 0      | 0.52  | 0.08   |
| GAIF01028356.1 | 0      | 0      | 0     | 0      | 0     | 0.04   |
| GAIF01028357.1 | 10.21  | 14.66  | 21.05 | 19.88  | 13.32 | 10.52  |
| GAIF01028359.1 | 163.24 | 184.2  | 40.66 | 30.23  | 17.82 | 3.45   |

|                |        |        |        |        |        |        |
|----------------|--------|--------|--------|--------|--------|--------|
| GAIF01028360.1 | 13.81  | 3.97   | 3.34   | 10.66  | 13.2   | 16.66  |
| GAIF01028362.1 | 1.91   | 4.16   | 1.16   | 0.3    | 0.18   | 0.18   |
| GAIF01028363.1 | 0.02   | 0.14   | 0.02   | 0.05   | 0.7    | 0.01   |
| GAIF01028364.1 | 0.1    | 0.1    | 0.1    | 0.44   | 1.38   | 0.32   |
| GAIF01028365.1 | 0.96   | 1.05   | 0      | 6.72   | 17.41  | 0.15   |
| GAIF01028366.1 | 0      | 0      | 0      | 0      | 1.45   | 0      |
| GAIF01028367.1 | 0      | 0.04   | 0.08   | 0      | 0.43   | 0.16   |
| GAIF01028368.1 | 0.65   | 2.13   | 0.99   | 0.25   | 0.31   | 0      |
| GAIF01028369.1 | 0      | 0      | 0      | 0      | 0.07   | 0      |
| GAIF01028370.1 | 0.79   | 1.54   | 0.52   | 1.83   | 5.11   | 0.35   |
| GAIF01028371.1 | 0      | 0.02   | 0      | 0      | 0      | 0.02   |
| GAIF01028372.1 | 0.69   | 3      | 0.16   | 3.2    | 4.04   | 0.11   |
| GAIF01028373.1 | 0      | 0      | 0      | 0.41   | 2.51   | 0      |
| GAIF01028375.1 | 0.59   | 0.14   | 0      | 0.39   | 0.43   | 0      |
| GAIF01028376.1 | 21.09  | 10.82  | 10.3   | 19.7   | 22.23  | 29.67  |
| GAIF01028377.1 | 0      | 0      | 0      | 0.18   | 1.63   | 0.09   |
| GAIF01028378.1 | 6.15   | 9.82   | 6.02   | 25.66  | 21.59  | 3.05   |
| GAIF01028379.1 | 11.06  | 9.68   | 4.57   | 19.31  | 20.21  | 2.57   |
| GAIF01028380.1 | 0      | 0      | 0      | 0.63   | 0.49   | 0      |
| GAIF01028381.1 | 1.42   | 0.39   | 0      | 0      | 0      | 0.42   |
| GAIF01028382.1 | 3.73   | 2.31   | 3.35   | 1.34   | 2.17   | 2.59   |
| GAIF01028383.1 | 0      | 0      | 0      | 0      | 0.16   | 0      |
| GAIF01028385.1 | 14.42  | 11.15  | 5.56   | 29.25  | 27.45  | 8.16   |
| GAIF01028386.1 | 223.34 | 318.58 | 141.31 | 0.17   | 0.18   | 0.5    |
| GAIF01028389.1 | 4.59   | 2.09   | 0.47   | 1.24   | 1.54   | 0.47   |
| GAIF01028390.1 | 23.46  | 19.82  | 17.56  | 39.84  | 27.13  | 4.24   |
| GAIF01028394.1 | 129.89 | 35.86  | 84.84  | 114.82 | 129.75 | 612.02 |
| GAIF01028396.1 | 0.47   | 0.31   | 1.03   | 0.11   | 0      | 0      |
| GAIF01028397.1 | 3.61   | 0      | 0      | 4.97   | 16.87  | 6.85   |
| GAIF01028398.1 | 0.22   | 0      | 0      | 0      | 0.07   | 0      |
| GAIF01028400.1 | 0.04   | 0.04   | 0.08   | 0.08   | 0.13   | 0.04   |
| GAIF01028401.1 | 7.69   | 5.57   | 2.76   | 1.01   | 0.62   | 0.06   |
| GAIF01028403.1 | 0      | 0      | 0      | 0      | 0.09   | 0      |
| GAIF01028404.1 | 11.46  | 12.92  | 8.73   | 36.61  | 59.13  | 3.77   |
| GAIF01028405.1 | 0      | 0      | 0      | 0.17   | 0      | 0      |
| GAIF01028406.1 | 213.84 | 215.68 | 362.81 | 22.15  | 5.98   | 20.69  |
| GAIF01028407.1 | 0      | 0      | 0      | 0.68   | 1.9    | 0      |
| GAIF01028408.1 | 0      | 0      | 0      | 0      | 0      | 0.07   |
| GAIF01028409.1 | 0.6    | 0.39   | 0      | 3.73   | 12.17  | 1.57   |
| GAIF01028410.1 | 0      | 0      | 0.07   | 0      | 0.08   | 0.07   |
| GAIF01028411.1 | 0      | 0      | 0      | 0.82   | 2.09   | 0      |
| GAIF01028412.1 | 0      | 0      | 0.12   | 0.13   | 0      | 0      |
| GAIF01028413.1 | 0.16   | 0      | 0      | 0.55   | 0.27   | 0.94   |
| GAIF01028414.1 | 60.49  | 75.65  | 106.45 | 83.91  | 78.24  | 145.07 |

|                |        |        |        |        |       |       |
|----------------|--------|--------|--------|--------|-------|-------|
| GAIF01028415.1 | 23.38  | 9.99   | 14.13  | 14.37  | 14.55 | 65.28 |
| GAIF01028417.1 | 38.46  | 50.16  | 28.66  | 45.36  | 41.8  | 6.54  |
| GAIF01028418.1 | 14.17  | 17.97  | 20.45  | 55.24  | 46.38 | 8.27  |
| GAIF01028419.1 | 0.38   | 0      | 0      | 1.52   | 4.04  | 0     |
| GAIF01028420.1 | 3.26   | 2.26   | 1.08   | 9.19   | 8.76  | 7.64  |
| GAIF01028421.1 | 11.66  | 21.81  | 14.61  | 4.88   | 2.06  | 0.65  |
| GAIF01028422.1 | 1.02   | 0.99   | 0.22   | 2.36   | 4.16  | 1.46  |
| GAIF01028428.1 | 0.25   | 0.09   | 0.14   | 0.97   | 1.3   | 0     |
| GAIF01028430.1 | 0      | 0      | 0      | 0      | 0.82  | 0     |
| GAIF01028431.1 | 0.12   | 0.13   | 0      | 0.14   | 0.5   | 0     |
| GAIF01028432.1 | 26.76  | 17.27  | 27.51  | 27.8   | 16.85 | 28.27 |
| GAIF01028434.1 | 56.14  | 64.91  | 30.32  | 103.08 | 84.91 | 7.45  |
| GAIF01028435.1 | 5.24   | 0      | 0      | 31.98  | 74.37 | 8.48  |
| GAIF01028436.1 | 4.32   | 7.39   | 3.09   | 10.66  | 6.67  | 2.82  |
| GAIF01028439.1 | 0.02   | 0      | 0      | 0      | 0     | 0     |
| GAIF01028440.1 | 1.55   | 2.81   | 0.95   | 4.94   | 11.19 | 0.76  |
| GAIF01028441.1 | 269.33 | 163.77 | 122.27 | 121.68 | 34.49 | 10.07 |
| GAIF01028442.1 | 0.28   | 0.1    | 0      | 0.11   | 0.11  | 0.31  |
| GAIF01028443.1 | 0      | 0      | 0      | 0      | 0.11  | 0     |
| GAIF01028444.1 | 0.46   | 0.48   | 0.81   | 2.53   | 14.54 | 6.69  |
| GAIF01028446.1 | 0      | 0      | 0      | 0      | 0.3   | 0     |
| GAIF01028447.1 | 0      | 0.1    | 0      | 0      | 0.21  | 0     |
| GAIF01028448.1 | 0.16   | 0.03   | 0.02   | 0.04   | 0.35  | 0.21  |
| GAIF01028450.1 | 0.34   | 0.5    | 0.13   | 0      | 0.28  | 0.13  |
| GAIF01028451.1 | 16.62  | 21.94  | 15.36  | 82.09  | 57.36 | 9.12  |
| GAIF01028452.1 | 75.58  | 91.38  | 87.79  | 24.93  | 19.42 | 30.59 |
| GAIF01028453.1 | 9.99   | 8.35   | 18.38  | 17.73  | 16.62 | 12.06 |
| GAIF01028454.1 | 1.7    | 1.56   | 0.67   | 0      | 0.08  | 0     |
| GAIF01028455.1 | 1.74   | 1.3    | 0.6    | 0      | 0.65  | 0.12  |
| GAIF01028456.1 | 0      | 0      | 0.17   | 0      | 0.76  | 0     |
| GAIF01028457.1 | 0.37   | 0.68   | 0.96   | 0      | 0     | 0.41  |
| GAIF01028458.1 | 0      | 0      | 0      | 0.28   | 1.5   | 0     |
| GAIF01028459.1 | 1.97   | 0.11   | 0.11   | 6.4    | 12.32 | 10.53 |
| GAIF01028460.1 | 0.76   | 0.69   | 1.11   | 0.44   | 0.31  | 1.4   |
| GAIF01028462.1 | 0      | 0      | 0      | 0      | 0.48  | 0     |
| GAIF01028464.1 | 34.8   | 39.74  | 41.22  | 51.71  | 29.51 | 6.13  |
| GAIF01028465.1 | 9.72   | 4.35   | 4.3    | 11.89  | 4.95  | 0.69  |
| GAIF01028466.1 | 3.21   | 0.75   | 0      | 9.69   | 57.32 | 3.93  |
| GAIF01028467.1 | 0      | 0.23   | 0      | 0.24   | 0.26  | 1.01  |
| GAIF01028468.1 | 0.05   | 0.09   | 0.06   | 0.55   | 2.07  | 0     |
| GAIF01028470.1 | 1.19   | 0.78   | 2.35   | 3.41   | 3.72  | 11.11 |
| GAIF01028471.1 | 28.27  | 20.68  | 9.06   | 48     | 36.72 | 13.42 |
| GAIF01028472.1 | 0      | 0      | 0      | 0.32   | 0.08  | 0.14  |
| GAIF01028474.1 | 0.31   | 0      | 0.17   | 0.18   | 9     | 0     |



|                |        |          |          |         |         |         |
|----------------|--------|----------|----------|---------|---------|---------|
| GAIF01028476.1 | 0.01   | 0        | 0        | 0       | 0       | 0       |
| GAIF01028477.1 | 0      | 0        | 0        | 0.19    | 0       | 0       |
| GAIF01028479.1 | 182.76 | 64.37    | 97.21    | 131.29  | 90.37   | 381     |
| GAIF01028480.1 | 1.32   | 0.16     | 0.12     | 3.07    | 14.66   | 7.8     |
| GAIF01028483.1 | 5.64   | 3.35     | 1.11     | 14.45   | 84.38   | 0.55    |
| GAIF01028486.1 | 547.03 | 292.65   | 186.58   | 193.64  | 120.55  | 72.67   |
| GAIF01028487.1 | 240.23 | 96.94    | 84.27    | 180.13  | 168.94  | 272.58  |
| GAIF01028489.1 | 8.36   | 6.32     | 6.39     | 9.21    | 13.97   | 13.53   |
| GAIF01028490.1 | 1.06   | 0        | 0.29     | 4.31    | 14.69   | 1.85    |
| GAIF01028491.1 | 0.04   | 0.09     | 0        | 0.23    | 1.34    | 0       |
| GAIF01028493.1 | 1.92   | 2.58     | 0.34     | 15.47   | 20.73   | 0       |
| GAIF01028495.1 | 4947.3 | 18121.64 | 17796.84 | 3481.86 | 4771.59 | 1732.47 |
| GAIF01028497.1 | 0      | 0.09     | 0        | 0.1     | 0.42    | 0       |
| GAIF01028498.1 | 0.09   | 0.19     | 0        | 0.4     | 2.19    | 0       |
| GAIF01028500.1 | 11.47  | 7.32     | 12.47    | 12.93   | 7.3     | 15.56   |
| GAIF01028502.1 | 0      | 0        | 0        | 1.41    | 5.39    | 0       |
| GAIF01028504.1 | 0      | 0        | 0        | 0.27    | 0       | 0.26    |
| GAIF01028505.1 | 15.04  | 14.96    | 16.59    | 31.89   | 41.99   | 5.03    |
| GAIF01028506.1 | 2.37   | 3.08     | 1.57     | 2.11    | 3.08    | 0.7     |
| GAIF01028507.1 | 12.43  | 10.94    | 20.9     | 33.31   | 29.36   | 44.02   |
| GAIF01028508.1 | 0.63   | 0        | 0        | 1.18    | 1.34    | 0.6     |
| GAIF01028509.1 | 0.16   | 0.08     | 0        | 0.02    | 1.18    | 0       |
| GAIF01028510.1 | 2.52   | 0.41     | 0        | 12.28   | 48.76   | 2.08    |
| GAIF01028511.1 | 1.66   | 0.55     | 0.85     | 2.69    | 3.02    | 3.96    |
| GAIF01028512.1 | 374.93 | 1102.98  | 1274.78  | 252.7   | 298.15  | 359.9   |
| GAIF01028513.1 | 0.29   | 0        | 0        | 1       | 2.5     | 0       |
| GAIF01028514.1 | 1.12   | 0.6      | 0.92     | 0.69    | 0       | 0.47    |
| GAIF01028515.1 | 10.25  | 4.02     | 5.55     | 19.42   | 26.97   | 12.42   |
| GAIF01028517.1 | 0.11   | 0        | 0        | 0       | 0       | 0       |
| GAIF01028519.1 | 26.1   | 22.35    | 53.47    | 94.61   | 96      | 52.42   |
| GAIF01028520.1 | 1.05   | 0.24     | 0.12     | 8.65    | 32.33   | 5.93    |
| GAIF01028521.1 | 0.07   | 0.16     | 0        | 1.3     | 3.33    | 0       |
| GAIF01028523.1 | 16.41  | 14.19    | 11.24    | 35.32   | 19.83   | 7.45    |
| GAIF01028524.1 | 1.2    | 0        | 0.05     | 1.92    | 8.1     | 5.24    |
| GAIF01028525.1 | 3.99   | 2.4      | 2.61     | 22.87   | 51.68   | 10.86   |
| GAIF01028526.1 | 0      | 0        | 0        | 0       | 0.1     | 0       |
| GAIF01028530.1 | 0.11   | 0        | 0        | 0       | 1.03    | 0       |
| GAIF01028531.1 | 0      | 0        | 0.05     | 0       | 0.06    | 0       |
| GAIF01028533.1 | 0      | 0        | 0        | 0       | 0.15    | 0       |
| GAIF01028535.1 | 0      | 0        | 0        | 0.16    | 0       | 0.08    |
| GAIF01028538.1 | 0.08   | 0.26     | 0.04     | 0.11    | 0.8     | 0       |
| GAIF01028539.1 | 0.18   | 0.12     | 0        | 2.56    | 13.34   | 0.2     |
| GAIF01028540.1 | 0.17   | 0.03     | 0.06     | 0.99    | 4.53    | 0.16    |
| GAIF01028543.1 | 0.05   | 0        | 0.18     | 0.19    | 0.26    | 0.18    |

|                |       |       |       |       |       |       |
|----------------|-------|-------|-------|-------|-------|-------|
| GAIF01028545.1 | 0.18  | 0.07  | 0     | 0.38  | 0.65  | 0     |
| GAIF01028547.1 | 2.43  | 0.58  | 0.07  | 24.94 | 84.39 | 1.39  |
| GAIF01028548.1 | 70.83 | 18.05 | 32.69 | 48.73 | 33.89 | 99.43 |
| GAIF01028549.1 | 13.19 | 4.78  | 9.66  | 17.04 | 10.65 | 72.37 |
| GAIF01028551.1 | 1.12  | 1.26  | 2.19  | 1.38  | 1     | 0.01  |
| GAIF01028552.1 | 2.7   | 0.49  | 0.49  | 20.18 | 64.64 | 20.24 |
| GAIF01028553.1 | 1.5   | 0.38  | 0.19  | 7.99  | 22.07 | 1.17  |
| GAIF01028555.1 | 1     | 0.09  | 0.12  | 1.2   | 0.24  | 0     |
| GAIF01028560.1 | 11.5  | 19.08 | 0.6   | 51.53 | 28.86 | 1.75  |
| GAIF01028561.1 | 0.68  | 0.78  | 0.41  | 2.49  | 1.83  | 0.17  |
| GAIF01028562.1 | 0.14  | 0     | 0.15  | 0.16  | 0.17  | 0.61  |
| GAIF01028563.1 | 74.13 | 32.16 | 4.2   | 29.15 | 67.88 | 10.75 |
| GAIF01028564.1 | 1.15  | 1.18  | 0.21  | 2.18  | 4.32  | 0.04  |
| GAIF01028567.1 | 0.05  | 0.35  | 0.06  | 0.31  | 2.27  | 0.18  |
| GAIF01028568.1 | 0.36  | 1.81  | 0.26  | 1.18  | 1.89  | 0     |
| GAIF01028570.1 | 2.53  | 4.44  | 2.32  | 3.43  | 1.52  | 0     |
| GAIF01028571.1 | 11.26 | 4.47  | 3.35  | 18.91 | 19.45 | 0.97  |
| GAIF01028572.1 | 0     | 0     | 0     | 0.9   | 8.81  | 1.89  |
| GAIF01028573.1 | 51.55 | 64.15 | 23.84 | 9.45  | 8.31  | 3.44  |
| GAIF01028574.1 | 0     | 0     | 0     | 12.99 | 2.95  | 3.2   |
| GAIF01028575.1 | 0     | 0     | 0     | 0     | 0.21  | 0     |
| GAIF01028576.1 | 0.59  | 0.12  | 0.04  | 1.16  | 10.58 | 1.34  |
| GAIF01028578.1 | 1.48  | 0.06  | 0.13  | 0.12  | 0.07  | 0.02  |
| GAIF01028582.1 | 0.78  | 0     | 0.19  | 2.21  | 7.19  | 0.48  |
| GAIF01028583.1 | 0     | 0     | 0     | 0     | 1.35  | 0     |
| GAIF01028584.1 | 4.12  | 4.61  | 0     | 11.63 | 13.71 | 5.28  |
| GAIF01028585.1 | 0.4   | 0     | 0.24  | 0.16  | 0.32  | 0.11  |
| GAIF01028586.1 | 4.96  | 2.05  | 12.33 | 13.05 | 10.09 | 2.06  |
| GAIF01028587.1 | 0     | 0     | 0     | 0.05  | 0     | 0     |
| GAIF01028590.1 | 0     | 0     | 0     | 0     | 0.15  | 0     |
| GAIF01028592.1 | 0.04  | 0     | 0.05  | 0     | 1.74  | 0     |
| GAIF01028597.1 | 1.14  | 0.4   | 0.24  | 0.55  | 4     | 2.42  |
| GAIF01028598.1 | 31.56 | 63.75 | 48.09 | 92.54 | 86.56 | 21.15 |
| GAIF01028599.1 | 0     | 0     | 0     | 0     | 0.11  | 0     |
| GAIF01028600.1 | 0.33  | 0     | 0     | 0     | 0     | 0     |
| GAIF01028601.1 | 0.53  | 0     | 0.18  | 0     | 0     | 0.66  |
| GAIF01028602.1 | 0.05  | 0     | 0.05  | 0.13  | 0.19  | 0     |
| GAIF01028603.1 | 20.45 | 25.98 | 18.99 | 52.95 | 57.76 | 10.33 |
| GAIF01028604.1 | 51.16 | 35.75 | 37.65 | 31.8  | 13.01 | 12.97 |
| GAIF01028605.1 | 0     | 0     | 0     | 0.39  | 2.12  | 0.09  |
| GAIF01028608.1 | 1.72  | 2.01  | 1.25  | 1.46  | 1.31  | 0.54  |
| GAIF01028609.1 | 2.59  | 3.36  | 1.48  | 14.69 | 21.93 | 0.96  |
| GAIF01028610.1 | 0.18  | 0     | 0     | 0     | 0     | 0.07  |
| GAIF01028611.1 | 0.02  | 0     | 0.03  | 0.28  | 1.02  | 0.03  |

|                |       |       |       |       |       |       |
|----------------|-------|-------|-------|-------|-------|-------|
| GAIF01028614.1 | 0     | 0     | 0     | 0.18  | 2.54  | 0.17  |
| GAIF01028616.1 | 0     | 0.75  | 0.76  | 0     | 0     | 0.41  |
| GAIF01028617.1 | 0.27  | 0     | 0     | 0.15  | 1.12  | 0     |
| GAIF01028618.1 | 0     | 0     | 0     | 0.01  | 0     | 0     |
| GAIF01028619.1 | 6.35  | 5.22  | 3.32  | 22.89 | 32.17 | 1.12  |
| GAIF01028620.1 | 1.94  | 2.63  | 1.46  | 2.53  | 2.33  | 0.4   |
| GAIF01028621.1 | 22.8  | 27.44 | 21.01 | 60.32 | 32.8  | 4.49  |
| GAIF01028623.1 | 12.5  | 9.42  | 6.93  | 5.43  | 3.81  | 1.87  |
| GAIF01028624.1 | 4.88  | 12.26 | 12.53 | 12.78 | 8.55  | 3.43  |
| GAIF01028625.1 | 0     | 0.04  | 0.18  | 0.09  | 0     | 0     |
| GAIF01028626.1 | 0.33  | 0.12  | 0.12  | 1.41  | 1.33  | 0     |
| GAIF01028627.1 | 0.69  | 0.11  | 0     | 0     | 0.04  | 0     |
| GAIF01028628.1 | 10.95 | 6.78  | 0     | 4.49  | 10.95 | 0     |
| GAIF01028630.1 | 0.12  | 0     | 0     | 0     | 0.1   | 0     |
| GAIF01028631.1 | 23.43 | 13.47 | 12.37 | 50.05 | 48.5  | 6.88  |
| GAIF01028634.1 | 0.47  | 0.43  | 0.04  | 2.14  | 8.48  | 0.12  |
| GAIF01028636.1 | 0     | 0.14  | 0     | 0     | 0     | 0     |
| GAIF01028637.1 | 0     | 0     | 0.13  | 0     | 1.31  | 0     |
| GAIF01028639.1 | 9.17  | 16.41 | 24.04 | 44.47 | 27.58 | 14.67 |
| GAIF01028640.1 | 0.01  | 0     | 0     | 0     | 0     | 0     |
| GAIF01028642.1 | 23.89 | 15.41 | 17.13 | 33.63 | 34.58 | 23.73 |
| GAIF01028643.1 | 1.57  | 1.23  | 0.88  | 5.64  | 7.36  | 0.42  |
| GAIF01028644.1 | 1.79  | 0.59  | 0     | 6.34  | 21.31 | 0.37  |
| GAIF01028645.1 | 10.09 | 12.84 | 10.73 | 2.67  | 2.12  | 0     |
| GAIF01028648.1 | 37.36 | 48.52 | 71.6  | 22.73 | 1.16  | 10.19 |
| GAIF01028649.1 | 2.23  | 1.74  | 0.3   | 4.7   | 3.53  | 0.08  |
| GAIF01028650.1 | 0     | 0.17  | 0.17  | 0     | 0     | 0     |
| GAIF01028653.1 | 0     | 0     | 0.08  | 0.16  | 0.04  | 0     |
| GAIF01028654.1 | 0.19  | 0     | 0     | 0     | 0.12  | 0.07  |
| GAIF01028655.1 | 3.01  | 3.68  | 3.92  | 0.55  | 0.34  | 0     |
| GAIF01028656.1 | 0     | 0     | 0     | 0.09  | 0.09  | 0     |
| GAIF01028660.1 | 1.6   | 2.38  | 1.23  | 1.92  | 1.09  | 0.06  |
| GAIF01028661.1 | 0     | 0     | 0     | 0     | 0.05  | 0     |
| GAIF01028663.1 | 10.62 | 22.96 | 15.55 | 35.72 | 30.12 | 3.32  |
| GAIF01028664.1 | 0.18  | 0     | 0     | 0.38  | 1.46  | 0.35  |
| GAIF01028665.1 | 36.48 | 85.22 | 34.7  | 80.11 | 76.4  | 7.75  |
| GAIF01028666.1 | 5.75  | 8.12  | 5.76  | 8.23  | 9.67  | 0.59  |
| GAIF01028667.1 | 0     | 0.14  | 0     | 0.52  | 0     | 0     |
| GAIF01028668.1 | 80.68 | 48.31 | 9.53  | 13.68 | 32.46 | 2.93  |
| GAIF01028671.1 | 15.08 | 22.1  | 20.57 | 27.47 | 37.99 | 4.82  |
| GAIF01028672.1 | 0     | 0     | 0.26  | 0     | 1.88  | 0.27  |
| GAIF01028673.1 | 0     | 0     | 0     | 0.06  | 0     | 0     |
| GAIF01028674.1 | 37.8  | 41.53 | 37.75 | 97.6  | 47.08 | 18.9  |
| GAIF01028675.1 | 7.75  | 7.52  | 5.27  | 18.63 | 6.32  | 7.02  |

|                |        |        |        |        |        |        |
|----------------|--------|--------|--------|--------|--------|--------|
| GAIF01028676.1 | 0.03   | 0      | 0      | 0.94   | 7.77   | 0.1    |
| GAIF01028678.1 | 0.01   | 0.02   | 0.05   | 0.09   | 0.62   | 0.46   |
| GAIF01028679.1 | 0.05   | 0.03   | 0      | 0.06   | 1.15   | 0.04   |
| GAIF01028680.1 | 0      | 0      | 0      | 0      | 0.12   | 0.11   |
| GAIF01028681.1 | 137.96 | 161.54 | 200.17 | 146.56 | 103.64 | 113.31 |
| GAIF01028682.1 | 30.89  | 26.4   | 15.39  | 84.81  | 72.62  | 8.11   |
| GAIF01028683.1 | 20.3   | 19.29  | 24.9   | 28.7   | 15.38  | 12.03  |
| GAIF01028684.1 | 28.97  | 20.64  | 28.26  | 25.15  | 30.4   | 15.67  |
| GAIF01028685.1 | 11.78  | 6.11   | 3.38   | 42.26  | 36.6   | 4.19   |
| GAIF01028686.1 | 3.38   | 1.73   | 1.52   | 6.41   | 3.82   | 4.34   |
| GAIF01028687.1 | 1.17   | 1.51   | 0.63   | 7.42   | 12.26  | 0.1    |
| GAIF01028690.1 | 0      | 0      | 0.03   | 0      | 0      | 0      |
| GAIF01028692.1 | 0      | 1.4    | 1.34   | 0      | 0      | 0.27   |
| GAIF01028693.1 | 4.74   | 2.13   | 3.12   | 11.41  | 14.62  | 5.06   |
| GAIF01028694.1 | 13.09  | 18.13  | 7.73   | 22.2   | 27.55  | 1.1    |
| GAIF01028695.1 | 40.37  | 37.01  | 43.28  | 49.24  | 7.18   | 2.24   |
| GAIF01028696.1 | 6.55   | 4.78   | 5.26   | 21.24  | 34.8   | 37.26  |
| GAIF01028697.1 | 15.13  | 14.67  | 6.44   | 24.78  | 30.5   | 5.1    |
| GAIF01028698.1 | 0      | 0.49   | 0      | 0.47   | 1.83   | 0.31   |
| GAIF01028699.1 | 0      | 0      | 0.13   | 0      | 0      | 0      |
| GAIF01028700.1 | 0.12   | 0      | 0      | 0      | 0      | 0      |
| GAIF01028701.1 | 28.8   | 21.03  | 19.68  | 17.53  | 12.9   | 13.23  |
| GAIF01028702.1 | 0.02   | 0      | 0      | 0      | 0.02   | 0      |
| GAIF01028704.1 | 0.12   | 0      | 0.07   | 0.21   | 0.51   | 0.27   |
| GAIF01028705.1 | 19.75  | 1.19   | 2.88   | 28.12  | 36.42  | 77.1   |
| GAIF01028706.1 | 0      | 0      | 0      | 0      | 0.08   | 0      |
| GAIF01028707.1 | 0.47   | 0.13   | 0      | 0.27   | 7.73   | 0      |
| GAIF01028709.1 | 0      | 0      | 0      | 0.05   | 0.05   | 0      |
| GAIF01028710.1 | 0.05   | 0      | 0      | 0      | 0      | 0      |
| GAIF01028711.1 | 0      | 0      | 0      | 0.02   | 0      | 0      |
| GAIF01028712.1 | 0      | 0.08   | 0      | 0.08   | 0      | 0      |
| GAIF01028713.1 | 0.73   | 1.03   | 0.83   | 0.12   | 0      | 0.06   |
| GAIF01028715.1 | 8.16   | 5.4    | 7.53   | 10.62  | 10.97  | 2.38   |
| GAIF01028717.1 | 0.5    | 0.23   | 0.16   | 4.77   | 11.17  | 0.08   |
| GAIF01028718.1 | 124.24 | 98.98  | 65.57  | 118.89 | 144.5  | 19.48  |
| GAIF01028720.1 | 0.4    | 0      | 0      | 0      | 0      | 0      |
| GAIF01028721.1 | 2.4    | 4.06   | 4.1    | 0.93   | 1.6    | 0.29   |
| GAIF01028722.1 | 84.8   | 174.29 | 103.48 | 152.05 | 200.71 | 22.57  |
| GAIF01028724.1 | 0      | 0      | 0      | 0      | 0.14   | 0      |
| GAIF01028725.1 | 18.86  | 18.69  | 16.62  | 52.61  | 43.29  | 8.4    |
| GAIF01028728.1 | 14     | 10.89  | 4.68   | 21.1   | 20.63  | 1.02   |
| GAIF01028729.1 | 37.09  | 36.78  | 47.24  | 59.92  | 49.6   | 37.28  |
| GAIF01028730.1 | 10.62  | 9.3    | 16.08  | 30.09  | 21.24  | 19.34  |
| GAIF01028731.1 | 0.15   | 0      | 0      | 0.45   | 3.25   | 0.15   |

|                |        |        |        |        |        |        |
|----------------|--------|--------|--------|--------|--------|--------|
| GAIF01028733.1 | 0      | 0      | 0      | 0.04   | 0.08   | 0      |
| GAIF01028734.1 | 0.26   | 0.5    | 4.05   | 0      | 0      | 7.83   |
| GAIF01028735.1 | 0.18   | 0.13   | 0.13   | 0.35   | 0.66   | 0      |
| GAIF01028737.1 | 0.37   | 0.89   | 0      | 2.44   | 8.89   | 2.01   |
| GAIF01028738.1 | 0.12   | 0      | 0.27   | 0.43   | 3.55   | 0      |
| GAIF01028739.1 | 0.13   | 0.14   | 0.2    | 0      | 0      | 0.15   |
| GAIF01028740.1 | 4.71   | 4.09   | 3.38   | 9.53   | 4.95   | 8.37   |
| GAIF01028743.1 | 0      | 0.05   | 0      | 0      | 0.32   | 0      |
| GAIF01028745.1 | 1.29   | 0.47   | 0.24   | 0.25   | 0.69   | 0.87   |
| GAIF01028746.1 | 0.31   | 0.47   | 0.07   | 3.93   | 17.61  | 0      |
| GAIF01028747.1 | 0.27   | 0.25   | 0.2    | 0.34   | 1.83   | 0      |
| GAIF01028750.1 | 0      | 0      | 0      | 0.21   | 0.21   | 0      |
| GAIF01028752.1 | 0.16   | 0      | 0      | 0.28   | 1.27   | 0.36   |
| GAIF01028753.1 | 0.17   | 0      | 0.12   | 0      | 0.68   | 0      |
| GAIF01028754.1 | 0      | 0.03   | 0      | 0      | 0      | 0      |
| GAIF01028755.1 | 0.01   | 0      | 0      | 0.29   | 0.22   | 0      |
| GAIF01028756.1 | 0.41   | 0.3    | 0      | 0.48   | 0.33   | 0      |
| GAIF01028758.1 | 6.49   | 2.64   | 3.26   | 11.17  | 5.93   | 9.31   |
| GAIF01028761.1 | 0      | 0      | 0.04   | 0.31   | 0.86   | 0.23   |
| GAIF01028762.1 | 41.3   | 63.05  | 89.81  | 113.6  | 112.3  | 79.77  |
| GAIF01028763.1 | 0.43   | 0.87   | 0.28   | 7.27   | 48.79  | 0.12   |
| GAIF01028764.1 | 2.27   | 0.61   | 0.27   | 7.75   | 26.17  | 1.67   |
| GAIF01028765.1 | 22.22  | 17.97  | 41.9   | 15.35  | 5.03   | 18.12  |
| GAIF01028766.1 | 6.23   | 1.14   | 0.51   | 1.89   | 1.05   | 0.13   |
| GAIF01028767.1 | 0      | 0      | 0      | 0      | 0      | 0.1    |
| GAIF01028768.1 | 540.53 | 422.27 | 557.95 | 305.49 | 146.82 | 451.02 |
| GAIF01028770.1 | 0.27   | 0      | 0      | 4.32   | 14.95  | 0.3    |
| GAIF01028771.1 | 0.07   | 0.25   | 0      | 0.25   | 0.47   | 0.09   |
| GAIF01028773.1 | 51.13  | 47.28  | 15.86  | 63.02  | 65.89  | 12.27  |
| GAIF01028775.1 | 0.08   | 0      | 0      | 0      | 0      | 0      |
| GAIF01028776.1 | 0.72   | 0      | 1.48   | 1.98   | 1.3    | 2.35   |
| GAIF01028777.1 | 5.21   | 2.43   | 1.36   | 1.87   | 2.99   | 0      |
| GAIF01028779.1 | 6.45   | 2.63   | 2.65   | 5.98   | 2.52   | 7.81   |
| GAIF01028780.1 | 0      | 0.1    | 0      | 0      | 0      | 0      |
| GAIF01028781.1 | 7.52   | 4.03   | 6.65   | 1.17   | 0.67   | 0.37   |
| GAIF01028782.1 | 20.54  | 24.33  | 20.04  | 45.49  | 46.66  | 9.08   |
| GAIF01028783.1 | 0      | 0      | 0      | 0      | 0.16   | 0      |
| GAIF01028784.1 | 0.13   | 0      | 0      | 0      | 0      | 0      |
| GAIF01028786.1 | 13.12  | 20.54  | 26     | 43.24  | 20.04  | 14.24  |
| GAIF01028787.1 | 55.51  | 48.71  | 7.98   | 73.97  | 102.84 | 58.57  |
| GAIF01028788.1 | 0.27   | 0      | 0.2    | 0      | 0      | 0      |
| GAIF01028789.1 | 0      | 0.07   | 0.07   | 0.1    | 0.3    | 0.15   |
| GAIF01028791.1 | 99.76  | 179.71 | 221.59 | 63.92  | 66.81  | 79.89  |
| GAIF01028792.1 | 0      | 0      | 0      | 0      | 0.29   | 0      |

|                |        |        |        |        |        |        |
|----------------|--------|--------|--------|--------|--------|--------|
| GAIF01028794.1 | 0      | 0.05   | 0      | 0.16   | 0.62   | 0      |
| GAIF01028795.1 | 0      | 0      | 0      | 0      | 0.12   | 0      |
| GAIF01028796.1 | 0.25   | 0.36   | 0.75   | 0.57   | 0.84   | 0.11   |
| GAIF01028797.1 | 0.26   | 0.09   | 0      | 0.86   | 1.96   | 0.57   |
| GAIF01028798.1 | 6.71   | 6.07   | 3.53   | 39.43  | 57.2   | 4.35   |
| GAIF01028799.1 | 0      | 0      | 0      | 0.32   | 0.49   | 0      |
| GAIF01028800.1 | 0      | 0      | 0      | 0.15   | 0.71   | 0      |
| GAIF01028804.1 | 0.73   | 0.62   | 0.6    | 1.32   | 1.33   | 0.29   |
| GAIF01028805.1 | 0      | 0      | 0      | 0.08   | 0      | 0      |
| GAIF01028807.1 | 3.17   | 0.82   | 0.38   | 6.04   | 16.67  | 2.28   |
| GAIF01028808.1 | 0      | 0      | 0      | 0      | 0.04   | 0      |
| GAIF01028810.1 | 0      | 0      | 0      | 0.04   | 0      | 0      |
| GAIF01028811.1 | 1.3    | 0.95   | 0      | 4.4    | 15.42  | 0      |
| GAIF01028812.1 | 10.04  | 24.11  | 17.79  | 21.46  | 20.81  | 2.08   |
| GAIF01028814.1 | 0.2    | 0.43   | 0      | 1.37   | 1.36   | 0.22   |
| GAIF01028815.1 | 0.07   | 0.08   | 0      | 0.14   | 0.77   | 0.05   |
| GAIF01028817.1 | 0      | 0      | 0      | 1.02   | 0      | 0      |
| GAIF01028818.1 | 3.22   | 1.05   | 0.58   | 6.21   | 8.63   | 1.98   |
| GAIF01028819.1 | 0.2    | 0.04   | 0.04   | 0.08   | 0.9    | 0.04   |
| GAIF01028820.1 | 0.39   | 0.36   | 0.02   | 1.03   | 1.91   | 0      |
| GAIF01028821.1 | 78.35  | 82.82  | 49.59  | 85.3   | 45.27  | 6.44   |
| GAIF01028822.1 | 0.06   | 0      | 0.05   | 0      | 1.09   | 0.03   |
| GAIF01028823.1 | 47.72  | 58.25  | 26.95  | 96.44  | 44.19  | 8.27   |
| GAIF01028824.1 | 0      | 0.08   | 0      | 0      | 0      | 0      |
| GAIF01028825.1 | 0.37   | 0.27   | 0      | 0.58   | 3.54   | 0      |
| GAIF01028826.1 | 35.42  | 44.51  | 21.34  | 7.91   | 4.32   | 0.72   |
| GAIF01028827.1 | 1.25   | 1.46   | 0.82   | 3.12   | 0.03   | 1.13   |
| GAIF01028829.1 | 0      | 0      | 0      | 0.04   | 0      | 0      |
| GAIF01028830.1 | 12.24  | 12.72  | 8.39   | 30.97  | 38.92  | 21.45  |
| GAIF01028833.1 | 0.41   | 0.34   | 0.05   | 1.01   | 1.37   | 1.27   |
| GAIF01028834.1 | 0      | 0      | 0      | 0.02   | 0.07   | 0      |
| GAIF01028835.1 | 225.19 | 256.87 | 494.19 | 231.85 | 183.45 | 562.77 |
| GAIF01028838.1 | 19.46  | 15.79  | 22.46  | 42.18  | 48.24  | 43.5   |
| GAIF01028839.1 | 0      | 0.33   | 0.17   | 0      | 3.82   | 1.32   |
| GAIF01028840.1 | 8.79   | 12.82  | 6      | 44.99  | 34.12  | 1.76   |
| GAIF01028841.1 | 0.03   | 0.02   | 0.01   | 0.08   | 0.05   | 0      |
| GAIF01028843.1 | 1.03   | 0.66   | 0.51   | 2.65   | 10.99  | 0.82   |
| GAIF01028848.1 | 17.94  | 14.7   | 14.41  | 40.73  | 23.45  | 10.03  |
| GAIF01028849.1 | 0      | 0      | 0      | 0      | 0.1    | 0      |
| GAIF01028850.1 | 0.12   | 0.13   | 0      | 1.51   | 7.5    | 0.09   |
| GAIF01028851.1 | 0.92   | 0.21   | 0.07   | 2.73   | 14.48  | 0.36   |
| GAIF01028852.1 | 13.42  | 27.37  | 4.05   | 12.4   | 20.84  | 3.59   |
| GAIF01028854.1 | 0      | 0.38   | 0      | 2.32   | 1.27   | 0.65   |
| GAIF01028855.1 | 0      | 0      | 0      | 0      | 0.56   | 0      |

|                |        |        |       |       |       |        |
|----------------|--------|--------|-------|-------|-------|--------|
| GAIF01028856.1 | 3.29   | 11.86  | 0     | 33.29 | 21.38 | 3.16   |
| GAIF01028857.1 | 0.53   | 0.34   | 0.4   | 1.05  | 0.77  | 0      |
| GAIF01028860.1 | 1.49   | 0      | 0.68  | 0     | 0     | 0      |
| GAIF01028861.1 | 186.06 | 291.34 | 25.87 | 18.76 | 92.56 | 27.47  |
| GAIF01028862.1 | 0      | 0      | 0     | 0     | 0.29  | 0      |
| GAIF01028863.1 | 0      | 0      | 0     | 1.64  | 10.69 | 0      |
| GAIF01028864.1 | 0.79   | 0.61   | 0.62  | 0.52  | 0.14  | 0      |
| GAIF01028868.1 | 0.12   | 0.04   | 0.04  | 0.04  | 0     | 0      |
| GAIF01028869.1 | 4.13   | 6.91   | 14.06 | 2.44  | 2.56  | 12.02  |
| GAIF01028870.1 | 24.09  | 0.01   | 0.02  | 26.15 | 0.01  | 0      |
| GAIF01028871.1 | 0      | 0      | 0     | 0     | 0.17  | 0      |
| GAIF01028872.1 | 0      | 0.3    | 0     | 0     | 0     | 0.1    |
| GAIF01028873.1 | 0      | 0      | 0     | 0.13  | 0.77  | 0      |
| GAIF01028874.1 | 0      | 0      | 0     | 0     | 0     | 0.03   |
| GAIF01028875.1 | 0.08   | 0.04   | 0     | 1.07  | 2.5   | 0.14   |
| GAIF01028876.1 | 0      | 0      | 0.08  | 0     | 0     | 0      |
| GAIF01028877.1 | 17.87  | 8.16   | 20.34 | 27.01 | 15.92 | 173.71 |
| GAIF01028879.1 | 0      | 0.15   | 0     | 0     | 0     | 0      |
| GAIF01028880.1 | 0.13   | 0.14   | 0     | 1.83  | 7.28  | 0.58   |
| GAIF01028881.1 | 0.2    | 0.11   | 0     | 0.23  | 0.24  | 0      |
| GAIF01028882.1 | 0.36   | 0      | 0     | 0.79  | 5.46  | 0.35   |
| GAIF01028887.1 | 4.16   | 7.03   | 4.26  | 6.94  | 5.17  | 0.67   |
| GAIF01028889.1 | 1.67   | 0.43   | 0.09  | 0.46  | 1.72  | 0      |
| GAIF01028890.1 | 0.83   | 2.35   | 0.37  | 0.77  | 0.4   | 0      |
| GAIF01028891.1 | 0      | 0.21   | 0.42  | 1.54  | 1.6   | 0      |
| GAIF01028894.1 | 4.35   | 4.6    | 3.16  | 1.64  | 0.64  | 0.19   |
| GAIF01028895.1 | 0.44   | 0.37   | 0.12  | 0.06  | 0.27  | 0.27   |
| GAIF01028896.1 | 0      | 0      | 0.03  | 0     | 0.05  | 0      |
| GAIF01028897.1 | 35.89  | 67.75  | 62.46 | 63.22 | 53.13 | 32.98  |
| GAIF01028898.1 | 5.55   | 6.73   | 8.2   | 10.77 | 5.9   | 4      |
| GAIF01028899.1 | 29.85  | 42.5   | 7.32  | 39.32 | 68.27 | 9      |
| GAIF01028901.1 | 0.13   | 0      | 0     | 1.75  | 7.25  | 0      |
| GAIF01028902.1 | 0      | 0.05   | 0.22  | 0     | 0     | 0      |
| GAIF01028903.1 | 37.36  | 25.05  | 4.06  | 71.98 | 86.63 | 10.06  |
| GAIF01028906.1 | 0      | 0      | 0     | 0     | 0.3   | 0      |
| GAIF01028909.1 | 0      | 0      | 0.05  | 0     | 0.12  | 0      |
| GAIF01028912.1 | 0.22   | 0      | 0     | 0     | 0     | 0      |
| GAIF01028913.1 | 0.78   | 0.09   | 0.1   | 0.5   | 0.21  | 0      |
| GAIF01028914.1 | 0      | 0.1    | 0.06  | 0     | 0.3   | 0.17   |
| GAIF01028916.1 | 17.04  | 17.96  | 10.28 | 4.15  | 3.67  | 1.62   |
| GAIF01028917.1 | 20.49  | 9.14   | 4.77  | 4.6   | 1.59  | 4.06   |
| GAIF01028918.1 | 1.65   | 0.09   | 0     | 0.16  | 0.14  | 0      |
| GAIF01028919.1 | 0.04   | 0      | 0     | 0.26  | 0.69  | 0.02   |
| GAIF01028921.1 | 0      | 0      | 0     | 0     | 0.22  | 0.09   |

|                |        |        |        |        |        |        |
|----------------|--------|--------|--------|--------|--------|--------|
| GAIF01028922.1 | 21.67  | 22.32  | 21.04  | 78.47  | 85.69  | 7.6    |
| GAIF01028925.1 | 37.78  | 50.46  | 29.88  | 61.34  | 52.29  | 4.42   |
| GAIF01028926.1 | 195.66 | 199.53 | 184.44 | 174.5  | 0      | 0.05   |
| GAIF01028927.1 | 2.31   | 2.23   | 2.99   | 6.45   | 10.77  | 2.76   |
| GAIF01028928.1 | 238.49 | 114.34 | 111.51 | 139.45 | 81.05  | 163.52 |
| GAIF01028929.1 | 0.31   | 0      | 0      | 0.18   | 3.73   | 0.34   |
| GAIF01028930.1 | 37.75  | 78.27  | 29.87  | 69.12  | 77.81  | 3.34   |
| GAIF01028931.1 | 0.43   | 0.16   | 0      | 0.33   | 0.35   | 0.32   |
| GAIF01028932.1 | 8.05   | 4.43   | 12.33  | 1.27   | 0.24   | 2.3    |
| GAIF01028934.1 | 0.94   | 1.24   | 0.24   | 3.64   | 2.64   | 0      |
| GAIF01028936.1 | 6.71   | 7.93   | 4.48   | 38.33  | 39.45  | 2.5    |
| GAIF01028937.1 | 1.08   | 0.14   | 0.07   | 0.29   | 2.89   | 0.28   |
| GAIF01028938.1 | 0.67   | 0.32   | 0.41   | 0.51   | 0.8    | 0      |
| GAIF01028939.1 | 0      | 0      | 0      | 0.32   | 0.98   | 0      |
| GAIF01028940.1 | 35.22  | 33.81  | 26.92  | 51.69  | 78.86  | 26.67  |
| GAIF01028941.1 | 16.92  | 79.33  | 113.46 | 22.07  | 32.96  | 30.18  |
| GAIF01028942.1 | 8.74   | 3.09   | 0.81   | 43.33  | 219.44 | 5.88   |
| GAIF01028943.1 | 7.04   | 8.87   | 8.18   | 22.15  | 19.51  | 3.96   |
| GAIF01028944.1 | 0      | 0      | 0.03   | 0.26   | 2.38   | 0.14   |
| GAIF01028945.1 | 1.89   | 0      | 0      | 0.67   | 0.16   | 0.08   |
| GAIF01028947.1 | 58.32  | 96.76  | 43.76  | 114.2  | 124.75 | 5.92   |
| GAIF01028948.1 | 0.14   | 0      | 0      | 0      | 0      | 0      |
| GAIF01028949.1 | 0      | 0      | 0      | 0      | 0.17   | 0      |
| GAIF01028951.1 | 65.76  | 18     | 46.93  | 55.78  | 27.2   | 47.13  |
| GAIF01028952.1 | 0      | 0.2    | 0      | 0      | 0      | 0      |
| GAIF01028954.1 | 0.09   | 0      | 0.07   | 0      | 0      | 0      |
| GAIF01028956.1 | 0.12   | 0.66   | 0      | 1.55   | 1.02   | 0      |
| GAIF01028957.1 | 3.86   | 2.74   | 0.16   | 20.15  | 87.96  | 3.27   |
| GAIF01028958.1 | 6.29   | 3.61   | 1.52   | 15.43  | 3.86   | 2.44   |
| GAIF01028960.1 | 15.57  | 17.46  | 20.81  | 23.4   | 17.71  | 9.45   |
| GAIF01028961.1 | 166.55 | 102.74 | 98.58  | 151.94 | 183.08 | 292.82 |
| GAIF01028962.1 | 0.45   | 0      | 0      | 0      | 0.11   | 0      |
| GAIF01028963.1 | 84.95  | 40.95  | 18.15  | 14.59  | 1.8    | 12.96  |
| GAIF01028965.1 | 3.08   | 7.51   | 3.84   | 2.9    | 1.6    | 0.18   |
| GAIF01028967.1 | 0.43   | 0.08   | 0.22   | 0      | 0      | 0.08   |
| GAIF01028969.1 | 0.45   | 0.1    | 0      | 0.72   | 6.43   | 0.98   |
| GAIF01028972.1 | 6.48   | 6.59   | 8.05   | 1.38   | 2.99   | 1.2    |
| GAIF01028974.1 | 1.61   | 1.38   | 1.56   | 1.06   | 0.63   | 0.22   |
| GAIF01028978.1 | 0.43   | 0      | 0      | 0.24   | 0.31   | 0.16   |
| GAIF01028979.1 | 0      | 0      | 0      | 0      | 0.21   | 0      |
| GAIF01028980.1 | 0.22   | 0      | 0.12   | 0.26   | 0.81   | 0      |
| GAIF01028984.1 | 0      | 0      | 0      | 0.09   | 0      | 0      |
| GAIF01028986.1 | 15.03  | 6.91   | 2.91   | 0.74   | 0.51   | 0.23   |
| GAIF01028987.1 | 10.75  | 2.86   | 0.67   | 33.67  | 49.32  | 48.98  |



|                |        |       |       |        |        |       |
|----------------|--------|-------|-------|--------|--------|-------|
| GAIF01028988.1 | 0      | 0.3   | 0     | 0.17   | 2.03   | 0     |
| GAIF01028989.1 | 67.76  | 92.58 | 54.89 | 111.93 | 141.47 | 9.98  |
| GAIF01028990.1 | 14.89  | 6.89  | 8.06  | 6.52   | 12.29  | 15.15 |
| GAIF01028991.1 | 1.1    | 1.27  | 0.55  | 1.65   | 3.4    | 0.75  |
| GAIF01028993.1 | 0.24   | 0     | 0     | 0.28   | 0      | 0     |
| GAIF01028994.1 | 0      | 0     | 0     | 0.1    | 0.31   | 0.09  |
| GAIF01028996.1 | 1.22   | 1.23  | 0.86  | 3.75   | 6.93   | 0.29  |
| GAIF01028998.1 | 0      | 0     | 0     | 0      | 0.19   | 0     |
| GAIF01028999.1 | 0.15   | 0.08  | 0     | 0.22   | 1.1    | 0.09  |
| GAIF01029000.1 | 0      | 0     | 0.04  | 0      | 0.25   | 0     |
| GAIF01029001.1 | 11.01  | 12.51 | 10.27 | 3.57   | 2.44   | 0.54  |
| GAIF01029003.1 | 0      | 0.58  | 0     | 0.13   | 0.15   | 0     |
| GAIF01029004.1 | 0.17   | 0.2   | 0.11  | 1      | 3.93   | 0.16  |
| GAIF01029005.1 | 0.04   | 0     | 0.01  | 0.19   | 0      | 0.39  |
| GAIF01029006.1 | 1.74   | 1.22  | 0     | 2.73   | 3.39   | 3.9   |
| GAIF01029008.1 | 0.13   | 0     | 0     | 0.65   | 0.31   | 0     |
| GAIF01029009.1 | 18.5   | 12.46 | 15.29 | 38.79  | 30.7   | 17.9  |
| GAIF01029010.1 | 7.26   | 7.51  | 7.57  | 15.23  | 11.06  | 2.19  |
| GAIF01029012.1 | 0      | 0     | 0.34  | 0      | 0      | 0     |
| GAIF01029013.1 | 22.31  | 14.56 | 11.16 | 89.86  | 216.56 | 23.22 |
| GAIF01029015.1 | 0.04   | 0     | 0     | 0.05   | 0      | 0     |
| GAIF01029016.1 | 0.98   | 0.14  | 0.14  | 0.23   | 0.08   | 0     |
| GAIF01029017.1 | 5.26   | 9.76  | 11.3  | 31.34  | 22.4   | 3.67  |
| GAIF01029018.1 | 0      | 0     | 0     | 0      | 0      | 0.12  |
| GAIF01029019.1 | 1.88   | 1.43  | 0.36  | 3.27   | 7.82   | 0.47  |
| GAIF01029020.1 | 0.17   | 0.04  | 0     | 0      | 0.08   | 0     |
| GAIF01029022.1 | 0      | 0     | 0     | 0.06   | 0.13   | 0     |
| GAIF01029023.1 | 0      | 0.13  | 0     | 0      | 0      | 0     |
| GAIF01029024.1 | 19.34  | 11.93 | 8.45  | 36.02  | 56.42  | 45.67 |
| GAIF01029025.1 | 0.23   | 0.12  | 0     | 0.08   | 0.26   | 0.07  |
| GAIF01029026.1 | 116.93 | 52.34 | 52.1  | 208.78 | 166.65 | 51.75 |
| GAIF01029027.1 | 3.65   | 2.55  | 1.49  | 3.87   | 8.3    | 1.24  |
| GAIF01029028.1 | 1.62   | 0.15  | 0     | 7.36   | 21.27  | 0.45  |
| GAIF01029029.1 | 16.51  | 29.23 | 44.26 | 42.03  | 25.07  | 22.47 |
| GAIF01029030.1 | 5.01   | 3.03  | 4.28  | 0      | 0      | 0.46  |
| GAIF01029031.1 | 0.2    | 0.29  | 0     | 0.23   | 0.69   | 0.14  |
| GAIF01029032.1 | 53.44  | 38.47 | 36.67 | 18.65  | 5.02   | 3.68  |
| GAIF01029034.1 | 0      | 0     | 0     | 0.09   | 0.29   | 0     |
| GAIF01029035.1 | 0.07   | 0.07  | 0     | 0.08   | 0.24   | 0     |
| GAIF01029039.1 | 0.15   | 0     | 0.25  | 0      | 0      | 0     |
| GAIF01029040.1 | 4.68   | 3.32  | 1.2   | 0.63   | 0.39   | 0.12  |
| GAIF01029042.1 | 0.23   | 0.09  | 0.01  | 1.68   | 2.71   | 0.01  |
| GAIF01029043.1 | 10.34  | 7.34  | 3.46  | 6      | 8.85   | 2.41  |
| GAIF01029044.1 | 14.67  | 19.01 | 24.91 | 49.75  | 42.08  | 32.84 |

|                |        |        |         |        |         |         |
|----------------|--------|--------|---------|--------|---------|---------|
| GAIF01029045.1 | 0      | 0      | 0       | 1.06   | 3.93    | 0       |
| GAIF01029046.1 | 0      | 0.2    | 0       | 0      | 0       | 0       |
| GAIF01029047.1 | 4.94   | 5.08   | 5.24    | 12.43  | 13.43   | 22.94   |
| GAIF01029048.1 | 15.24  | 10.38  | 8.49    | 24.47  | 39.57   | 54.71   |
| GAIF01029049.1 | 0.86   | 0.37   | 0.53    | 0.33   | 0.12    | 0.42    |
| GAIF01029050.1 | 0.6    | 0.48   | 0.48    | 0      | 0       | 0.12    |
| GAIF01029051.1 | 15.5   | 10.5   | 10.28   | 28.58  | 24.48   | 18.7    |
| GAIF01029052.1 | 2      | 0      | 0       | 4.46   | 5.65    | 2.18    |
| GAIF01029053.1 | 1298.4 | 4406   | 5313.07 | 847.57 | 1653.75 | 5955.31 |
| GAIF01029054.1 | 1.33   | 0      | 0       | 0.17   | 3.02    | 0       |
| GAIF01029055.1 | 63.7   | 52.54  | 81.6    | 118.22 | 80.14   | 70.93   |
| GAIF01029056.1 | 45.82  | 14.42  | 70.68   | 47.07  | 12.81   | 10.93   |
| GAIF01029058.1 | 0.87   | 0.29   | 0.23    | 2.99   | 12.89   | 3.52    |
| GAIF01029059.1 | 9.45   | 10.61  | 14.58   | 12.54  | 10.69   | 7.54    |
| GAIF01029061.1 | 0.19   | 0      | 0       | 0      | 0       | 0.21    |
| GAIF01029062.1 | 0      | 0      | 0       | 0      | 0.08    | 0       |
| GAIF01029063.1 | 14.04  | 6.32   | 8.91    | 20.41  | 16.17   | 61.71   |
| GAIF01029064.1 | 4.37   | 0.22   | 0       | 5.98   | 22.68   | 10.73   |
| GAIF01029065.1 | 31.07  | 29.32  | 18.9    | 41.63  | 23.61   | 7.23    |
| GAIF01029066.1 | 0      | 0.39   | 0.83    | 0      | 0       | 0.06    |
| GAIF01029067.1 | 0      | 0      | 0       | 0.99   | 5.57    | 0       |
| GAIF01029068.1 | 0.1    | 0      | 0       | 0      | 0       | 0       |
| GAIF01029069.1 | 11.77  | 8.77   | 1.27    | 4.89   | 5.23    | 0.24    |
| GAIF01029070.1 | 0.1    | 0      | 0       | 0      | 0       | 0       |
| GAIF01029071.1 | 0.16   | 0.17   | 0       | 0.36   | 0.56    | 1.03    |
| GAIF01029074.1 | 7.77   | 5.5    | 6.2     | 30.33  | 18.83   | 6.88    |
| GAIF01029075.1 | 0.26   | 1.37   | 0       | 1.52   | 1.21    | 0       |
| GAIF01029076.1 | 0.76   | 1.03   | 0       | 1.32   | 1.36    | 1.16    |
| GAIF01029079.1 | 454.92 | 466.81 | 739.86  | 429.79 | 260.16  | 625.33  |
| GAIF01029080.1 | 2.26   | 2.57   | 5.83    | 9.93   | 7.8     | 3.68    |
| GAIF01029081.1 | 0.16   | 0      | 0       | 0      | 0.07    | 0       |
| GAIF01029082.1 | 0      | 0.3    | 0.07    | 0.07   | 0       | 0       |
| GAIF01029084.1 | 4.47   | 1.38   | 0       | 1.45   | 1.84    | 1.02    |
| GAIF01029085.1 | 5.14   | 0.55   | 0.64    | 0.08   | 0       | 0.32    |
| GAIF01029086.1 | 30.09  | 15.43  | 17.93   | 26.44  | 21.71   | 6.16    |
| GAIF01029088.1 | 39.45  | 52.67  | 31.34   | 203.97 | 114.63  | 11.91   |
| GAIF01029089.1 | 0      | 0.23   | 0       | 0      | 0.38    | 0       |
| GAIF01029090.1 | 1.84   | 0.6    | 0.91    | 2.56   | 9.27    | 1.92    |
| GAIF01029091.1 | 0      | 0      | 0.14    | 0      | 0.46    | 0       |
| GAIF01029093.1 | 1.88   | 0.97   | 0.1     | 1.14   | 1.29    | 0       |
| GAIF01029094.1 | 26.8   | 47.44  | 28.44   | 32.98  | 47.01   | 15.22   |
| GAIF01029095.1 | 4.5    | 0      | 14.75   | 8.6    | 8.66    | 9.48    |
| GAIF01029096.1 | 26.31  | 28.75  | 23.97   | 56.74  | 69.8    | 16.22   |
| GAIF01029097.1 | 0      | 0      | 0       | 0.09   | 0.37    | 0       |

|                |         |         |         |         |         |         |
|----------------|---------|---------|---------|---------|---------|---------|
| GAIF01029098.1 | 0       | 0       | 0       | 0       | 0.01    | 0       |
| GAIF01029099.1 | 0       | 0       | 0       | 0.11    | 0       | 0.06    |
| GAIF01029100.1 | 4.78    | 14      | 6.64    | 14.44   | 14.58   | 1.93    |
| GAIF01029101.1 | 4345.07 | 5055.81 | 6982.31 | 2986.65 | 2029.74 | 3977.64 |
| GAIF01029102.1 | 3.69    | 1.92    | 0.74    | 13.28   | 14.29   | 0.41    |
| GAIF01029105.1 | 24.13   | 17.59   | 10.74   | 152.85  | 76.57   | 7.75    |
| GAIF01029106.1 | 37.21   | 22.32   | 16.33   | 142.65  | 95.7    | 223.87  |
| GAIF01029108.1 | 13.78   | 8.56    | 15.21   | 31.13   | 11.75   | 31.89   |
| GAIF01029109.1 | 0.08    | 0.08    | 0       | 0.44    | 2.56    | 0.25    |
| GAIF01029110.1 | 343.84  | 145.19  | 170.76  | 410.26  | 165.28  | 255.92  |
| GAIF01029111.1 | 3.42    | 0.3     | 0.69    | 5.48    | 11.85   | 0       |
| GAIF01029114.1 | 0       | 0       | 0       | 0.11    | 0.11    | 0       |
| GAIF01029115.1 | 0.77    | 0.5     | 0.63    | 15.64   | 1.66    | 0       |
| GAIF01029117.1 | 0.25    | 0.23    | 0.38    | 0.13    | 0.1     | 0.05    |
| GAIF01029119.1 | 0       | 0.08    | 0.25    | 0.17    | 0.14    | 0       |
| GAIF01029120.1 | 0.12    | 0.11    | 0.85    | 0.09    | 0.1     | 0.33    |
| GAIF01029121.1 | 0       | 0       | 0       | 0       | 0.9     | 0       |
| GAIF01029123.1 | 0.12    | 0       | 0       | 0.14    | 0.04    | 0       |
| GAIF01029124.1 | 11.43   | 9.06    | 0       | 16.26   | 24.37   | 0       |
| GAIF01029125.1 | 0       | 0       | 0       | 0.64    | 0.84    | 0       |
| GAIF01029126.1 | 1.67    | 0       | 0       | 14.2    | 14.92   | 3.24    |
| GAIF01029128.1 | 0       | 1.74    | 2.02    | 0.09    | 0       | 0.18    |
| GAIF01029129.1 | 0       | 0.09    | 0       | 0       | 0.17    | 0.16    |
| GAIF01029131.1 | 6.14    | 6.33    | 6.51    | 16.83   | 15.15   | 8.75    |
| GAIF01029132.1 | 1.05    | 1       | 2.92    | 1.67    | 3.83    | 1.57    |
| GAIF01029133.1 | 0.12    | 0       | 0       | 0.43    | 4.04    | 0.69    |
| GAIF01029134.1 | 0.14    | 0       | 0       | 0.33    | 0.34    | 0       |
| GAIF01029135.1 | 13.05   | 16.98   | 14.46   | 20.38   | 20.26   | 7.22    |
| GAIF01029137.1 | 1.28    | 1.82    | 1.73    | 4.81    | 7.95    | 0.87    |
| GAIF01029139.1 | 0       | 0.24    | 1.36    | 0       | 0       | 0.16    |
| GAIF01029140.1 | 42.04   | 15.8    | 26.64   | 19.82   | 9.03    | 39.58   |
| GAIF01029141.1 | 28.52   | 10.43   | 9.12    | 41.55   | 75.68   | 80.89   |
| GAIF01029142.1 | 0       | 0       | 0       | 0.19    | 0.58    | 0       |
| GAIF01029144.1 | 1.36    | 0.46    | 0.7     | 0.1     | 0.27    | 0.09    |
| GAIF01029145.1 | 0.74    | 0.6     | 0.07    | 7.09    | 26.21   | 0.07    |
| GAIF01029146.1 | 3.06    | 2.3     | 1.39    | 7.85    | 17.03   | 2.56    |
| GAIF01029148.1 | 1.27    | 0.87    | 0.44    | 1.08    | 1.84    | 0.15    |
| GAIF01029149.1 | 0.99    | 0.22    | 0       | 0.23    | 0.48    | 0       |
| GAIF01029150.1 | 6.55    | 5.52    | 2.81    | 8.78    | 10.23   | 1.24    |
| GAIF01029151.1 | 27.77   | 30.88   | 17.05   | 3.96    | 3.8     | 0.28    |
| GAIF01029153.1 | 0       | 0       | 0       | 0.12    | 0       | 0       |
| GAIF01029154.1 | 0.05    | 0       | 0       | 0       | 0.19    | 0       |
| GAIF01029157.1 | 0.07    | 0.03    | 0       | 0       | 0.34    | 0       |
| GAIF01029158.1 | 0.23    | 0.13    | 0.13    | 1.87    | 8.19    | 1.53    |

|                |        |        |        |       |       |        |
|----------------|--------|--------|--------|-------|-------|--------|
| GAIF01029161.1 | 0.05   | 0      | 0.08   | 0.14  | 0     | 0      |
| GAIF01029162.1 | 3.2    | 0.8    | 0.18   | 1.14  | 5.53  | 0.36   |
| GAIF01029163.1 | 0      | 0      | 0      | 0     | 0.19  | 0      |
| GAIF01029164.1 | 0      | 0      | 0.25   | 0     | 0.28  | 0.13   |
| GAIF01029165.1 | 0      | 0      | 0      | 0     | 0.1   | 0      |
| GAIF01029166.1 | 0.03   | 0.05   | 0.04   | 0.19  | 0.45  | 0      |
| GAIF01029167.1 | 0.22   | 0.06   | 0      | 1.59  | 5.02  | 0.18   |
| GAIF01029168.1 | 0      | 0      | 0      | 0     | 0.07  | 0      |
| GAIF01029169.1 | 0      | 0      | 0      | 0     | 0     | 0.06   |
| GAIF01029170.1 | 29.75  | 22.78  | 25.46  | 0     | 3.79  | 7.71   |
| GAIF01029171.1 | 13.06  | 17.48  | 9.29   | 66.64 | 41.79 | 5.06   |
| GAIF01029172.1 | 0      | 0.11   | 0.12   | 0.73  | 6.2   | 0.12   |
| GAIF01029173.1 | 4.21   | 2.05   | 2.26   | 4.8   | 0.77  | 15.1   |
| GAIF01029176.1 | 0      | 0      | 0.22   | 0     | 0     | 0.11   |
| GAIF01029177.1 | 0.71   | 0.12   | 0      | 2.67  | 13.05 | 0.38   |
| GAIF01029178.1 | 18.37  | 8.86   | 11.03  | 27.67 | 33.63 | 62.88  |
| GAIF01029179.1 | 4.8    | 3.61   | 0.41   | 26.15 | 44.9  | 2.85   |
| GAIF01029180.1 | 1.84   | 1.2    | 0.08   | 0.28  | 0.65  | 0      |
| GAIF01029181.1 | 0      | 0.53   | 0.4    | 0.14  | 0.15  | 0      |
| GAIF01029182.1 | 4.58   | 8.27   | 6.98   | 0.97  | 0.25  | 0      |
| GAIF01029183.1 | 40.85  | 63.76  | 39.53  | 86.56 | 51.52 | 12.39  |
| GAIF01029185.1 | 1.6    | 0.59   | 0      | 0     | 0     | 0      |
| GAIF01029186.1 | 0.43   | 0.09   | 0      | 0.5   | 1.45  | 0.47   |
| GAIF01029187.1 | 0.03   | 0.24   | 0.14   | 0     | 0     | 0.03   |
| GAIF01029188.1 | 0      | 0.17   | 0      | 0.12  | 0.15  | 0      |
| GAIF01029189.1 | 134.24 | 127.6  | 341.51 | 73.15 | 49.13 | 297.69 |
| GAIF01029191.1 | 0.11   | 0.24   | 0.01   | 0     | 0     | 0      |
| GAIF01029192.1 | 0.15   | 0.06   | 0      | 0     | 0     | 0.4    |
| GAIF01029195.1 | 396.85 | 187.76 | 215.09 | 99.01 | 58.07 | 63.45  |
| GAIF01029196.1 | 1.55   | 2.59   | 0.57   | 27.51 | 23.03 | 0.92   |
| GAIF01029197.1 | 0      | 0      | 0.08   | 0     | 0     | 0      |
| GAIF01029198.1 | 0      | 0      | 0      | 0.22  | 1.35  | 0      |
| GAIF01029201.1 | 151.08 | 262.62 | 235.71 | 71.68 | 84.58 | 51.13  |
| GAIF01029202.1 | 0      | 0.23   | 0      | 0     | 0.17  | 0      |
| GAIF01029203.1 | 0      | 0      | 0      | 0.12  | 0.97  | 0.11   |
| GAIF01029206.1 | 4.55   | 7.25   | 12.87  | 8.88  | 8.15  | 7.23   |
| GAIF01029208.1 | 20.14  | 29.55  | 20.67  | 22.1  | 20.51 | 12.2   |
| GAIF01029209.1 | 0.14   | 0.08   | 0      | 0.04  | 0.2   | 0.13   |
| GAIF01029210.1 | 15.52  | 18.25  | 11.57  | 73.71 | 78.84 | 6.17   |
| GAIF01029213.1 | 0.08   | 0.18   | 0      | 0     | 1.02  | 0      |
| GAIF01029214.1 | 24.83  | 49.69  | 28.89  | 37.29 | 23.49 | 3.94   |
| GAIF01029215.1 | 0.13   | 0      | 0      | 0.95  | 4.91  | 0      |
| GAIF01029216.1 | 0      | 0.23   | 0.23   | 0.2   | 0.39  | 0.12   |
| GAIF01029217.1 | 0.22   | 0.43   | 0      | 0.46  | 0     | 0      |

|                |       |       |       |        |        |        |
|----------------|-------|-------|-------|--------|--------|--------|
| GAIF01029219.1 | 29.7  | 29.82 | 16.05 | 85.69  | 47.73  | 6.61   |
| GAIF01029220.1 | 0.21  | 0     | 0     | 0      | 0.99   | 0      |
| GAIF01029221.1 | 0.54  | 0.32  | 0     | 7.32   | 13.02  | 0      |
| GAIF01029223.1 | 10.9  | 4.82  | 13.25 | 23.29  | 32.52  | 29.4   |
| GAIF01029225.1 | 1.19  | 0.43  | 0     | 0.69   | 2.87   | 0      |
| GAIF01029227.1 | 47.31 | 27.03 | 22.15 | 67.34  | 37.56  | 21.97  |
| GAIF01029228.1 | 0     | 0     | 0     | 0.13   | 0      | 0      |
| GAIF01029229.1 | 0.08  | 0     | 0.09  | 0      | 0.1    | 0      |
| GAIF01029230.1 | 10.35 | 8.7   | 9.71  | 21.62  | 24.88  | 13.06  |
| GAIF01029231.1 | 29.47 | 28.39 | 29.96 | 54.93  | 34.02  | 21.08  |
| GAIF01029232.1 | 0.31  | 0.11  | 0.11  | 1.19   | 5.91   | 0.34   |
| GAIF01029235.1 | 5.26  | 12.82 | 3.56  | 28.89  | 43.67  | 0.62   |
| GAIF01029236.1 | 2.39  | 1.3   | 0     | 9.32   | 17.35  | 0.12   |
| GAIF01029237.1 | 0.14  | 0     | 0     | 0      | 0      | 0      |
| GAIF01029238.1 | 30.82 | 17.25 | 7.74  | 64.98  | 108.2  | 12.26  |
| GAIF01029239.1 | 0     | 0.04  | 0     | 0      | 0      | 0      |
| GAIF01029240.1 | 14.06 | 9.92  | 7.97  | 24.75  | 34.66  | 28.99  |
| GAIF01029241.1 | 6.79  | 7.08  | 7.3   | 46.05  | 28.41  | 9.59   |
| GAIF01029242.1 | 92.19 | 53.31 | 54.2  | 97.29  | 82.6   | 41.58  |
| GAIF01029243.1 | 16.18 | 12.28 | 14.63 | 63.76  | 146.09 | 50.12  |
| GAIF01029244.1 | 77.07 | 88.75 | 54.68 | 14.16  | 30.95  | 44.67  |
| GAIF01029245.1 | 0     | 0.1   | 0     | 0      | 0      | 0      |
| GAIF01029247.1 | 0     | 0     | 0     | 1.37   | 0.79   | 0.62   |
| GAIF01029248.1 | 7.09  | 72.37 | 64.85 | 0.98   | 1.02   | 3.73   |
| GAIF01029249.1 | 0     | 0     | 0.17  | 0      | 0      | 0      |
| GAIF01029250.1 | 0.18  | 0.2   | 0.1   | 0.21   | 0      | 0.2    |
| GAIF01029251.1 | 0.13  | 0     | 0     | 0      | 0      | 0.07   |
| GAIF01029252.1 | 12.85 | 4.67  | 2.82  | 24.6   | 45.78  | 3.4    |
| GAIF01029253.1 | 0.13  | 0.15  | 0     | 2.17   | 11.73  | 0      |
| GAIF01029254.1 | 6.91  | 1.73  | 0     | 24.64  | 54.68  | 8.32   |
| GAIF01029255.1 | 6.99  | 0.37  | 1.5   | 211.61 | 189.73 | 80.64  |
| GAIF01029256.1 | 0.7   | 0.24  | 3.18  | 0.17   | 0      | 3.06   |
| GAIF01029257.1 | 36.97 | 36.79 | 26.82 | 86.55  | 95.44  | 16.48  |
| GAIF01029258.1 | 0.15  | 0.08  | 0.31  | 0.09   | 0.03   | 0      |
| GAIF01029259.1 | 1.04  | 0.51  | 0     | 1.05   | 1.27   | 4.91   |
| GAIF01029261.1 | 0     | 0.35  | 0.12  | 0      | 0.26   | 0      |
| GAIF01029262.1 | 0     | 0     | 0     | 0.14   | 0.59   | 0.14   |
| GAIF01029263.1 | 0     | 0     | 0     | 0      | 0.31   | 0      |
| GAIF01029265.1 | 21.36 | 22.29 | 53.89 | 19.92  | 28.79  | 178.05 |
| GAIF01029266.1 | 59.14 | 48.15 | 26.45 | 88.78  | 74.16  | 19.86  |
| GAIF01029267.1 | 0     | 0     | 0     | 0.06   | 0.13   | 0      |
| GAIF01029268.1 | 12.74 | 17.74 | 13.17 | 13.99  | 6.56   | 1.19   |
| GAIF01029269.1 | 0.31  | 0.08  | 0     | 0.31   | 0      | 0.13   |
| GAIF01029270.1 | 0.08  | 0     | 0     | 0      | 0.1    | 0      |

|                |        |        |        |        |        |       |
|----------------|--------|--------|--------|--------|--------|-------|
| GAIF01029271.1 | 64.06  | 68.42  | 107.27 | 152.08 | 109.19 | 30.06 |
| GAIF01029272.1 | 0.68   | 0.9    | 1.11   | 0.99   | 0.97   | 0.27  |
| GAIF01029274.1 | 0.78   | 0.39   | 0.13   | 4.06   | 29.78  | 0.13  |
| GAIF01029275.1 | 0      | 0      | 0      | 0      | 0.16   | 0     |
| GAIF01029277.1 | 0.11   | 0.04   | 0      | 0.54   | 1.57   | 0.05  |
| GAIF01029278.1 | 18.13  | 22.66  | 33.99  | 49.6   | 18.55  | 19.46 |
| GAIF01029279.1 | 0.24   | 0      | 0      | 0      | 0.78   | 0.2   |
| GAIF01029280.1 | 0      | 0      | 0      | 0.03   | 0.12   | 0.11  |
| GAIF01029281.1 | 0      | 0      | 0.4    | 0      | 0      | 0.3   |
| GAIF01029282.1 | 0.22   | 0.14   | 0.4    | 0.3    | 1.47   | 0.2   |
| GAIF01029283.1 | 0      | 0      | 0.11   | 1.33   | 3.25   | 0.23  |
| GAIF01029284.1 | 0      | 0      | 0      | 0.07   | 0      | 0     |
| GAIF01029286.1 | 0.88   | 0.26   | 0.13   | 0.01   | 0.02   | 0     |
| GAIF01029288.1 | 0      | 0      | 0      | 0.17   | 0.09   | 0     |
| GAIF01029289.1 | 8.5    | 4.66   | 4.49   | 3.53   | 3.42   | 2.44  |
| GAIF01029291.1 | 0.52   | 0.14   | 0.27   | 0.06   | 0.44   | 0.12  |
| GAIF01029293.1 | 0.44   | 0.94   | 1.91   | 0      | 0.1    | 0.16  |
| GAIF01029294.1 | 0.19   | 0.2    | 0.02   | 1.3    | 4.23   | 0.09  |
| GAIF01029295.1 | 0      | 0.11   | 0      | 0      | 0      | 0     |
| GAIF01029297.1 | 27.04  | 17.48  | 25.38  | 36.69  | 17.74  | 38.28 |
| GAIF01029301.1 | 0.06   | 10.81  | 8.75   | 0      | 0.08   | 0.47  |
| GAIF01029302.1 | 12.44  | 16.37  | 19.67  | 12.02  | 15.67  | 7.27  |
| GAIF01029303.1 | 2.64   | 3.4    | 0.82   | 4.7    | 5.38   | 0.64  |
| GAIF01029304.1 | 0      | 0      | 0      | 0.12   | 0.67   | 0     |
| GAIF01029305.1 | 0      | 0.13   | 0      | 0      | 0.36   | 0     |
| GAIF01029306.1 | 0      | 0      | 0      | 0      | 0.4    | 0     |
| GAIF01029307.1 | 0      | 0      | 0      | 0.49   | 0      | 0     |
| GAIF01029308.1 | 17.18  | 15.97  | 17.36  | 21.53  | 35.69  | 98.76 |
| GAIF01029309.1 | 25.01  | 38.89  | 19.59  | 189.51 | 120.4  | 16.16 |
| GAIF01029312.1 | 0.46   | 0.38   | 0.12   | 0.23   | 1.31   | 0.12  |
| GAIF01029313.1 | 32.69  | 22.51  | 17.65  | 54.65  | 54.19  | 34.86 |
| GAIF01029314.1 | 0      | 0.18   | 0      | 0      | 0      | 0     |
| GAIF01029315.1 | 138.11 | 115.67 | 52.97  | 75.44  | 211.66 | 74.48 |
| GAIF01029316.1 | 0.06   | 0      | 0      | 0      | 0      | 0.13  |
| GAIF01029320.1 | 11.76  | 3.57   | 6.01   | 10.16  | 2.47   | 3.62  |
| GAIF01029321.1 | 0.17   | 0.44   | 0      | 4.51   | 17.64  | 0     |
| GAIF01029322.1 | 0.34   | 0      | 0      | 0.55   | 2.02   | 0     |
| GAIF01029324.1 | 0.13   | 0.1    | 0.1    | 0.26   | 0.88   | 0.15  |
| GAIF01029325.1 | 0      | 0.45   | 0      | 0      | 0      | 0.41  |
| GAIF01029326.1 | 0.48   | 0.52   | 0.63   | 0.67   | 1.27   | 0.32  |
| GAIF01029328.1 | 29.75  | 23.45  | 30.56  | 41.59  | 17.78  | 9.59  |
| GAIF01029329.1 | 1.33   | 2.65   | 1.22   | 2.32   | 1.33   | 1.22  |
| GAIF01029330.1 | 0      | 0      | 0      | 0      | 0.21   | 0     |
| GAIF01029331.1 | 4.01   | 2.86   | 3.04   | 19.64  | 29.25  | 13.2  |

|                |        |        |        |        |        |        |
|----------------|--------|--------|--------|--------|--------|--------|
| GAIF01029334.1 | 0.32   | 0.46   | 0.22   | 8.66   | 14.15  | 0.96   |
| GAIF01029335.1 | 1.2    | 0.26   | 0      | 0      | 0.29   | 0.26   |
| GAIF01029336.1 | 0.04   | 0      | 0      | 0      | 0      | 0      |
| GAIF01029337.1 | 1.6    | 0.74   | 0      | 7.68   | 14.82  | 0      |
| GAIF01029338.1 | 0.16   | 0.1    | 0.14   | 1.79   | 8.45   | 0.14   |
| GAIF01029342.1 | 2.74   | 3.87   | 2.86   | 9.04   | 6.73   | 1.43   |
| GAIF01029343.1 | 0.09   | 0      | 0      | 0.4    | 0      | 0      |
| GAIF01029344.1 | 19.35  | 19.68  | 9.85   | 139.64 | 72.81  | 9.5    |
| GAIF01029345.1 | 0.26   | 0.29   | 0.11   | 1.34   | 2.3    | 0.04   |
| GAIF01029346.1 | 2.66   | 1.02   | 2.06   | 2.36   | 0.75   | 1.03   |
| GAIF01029347.1 | 155.5  | 50.55  | 27.21  | 287.64 | 269.83 | 25.26  |
| GAIF01029348.1 | 0.07   | 0      | 0      | 0      | 0.07   | 0      |
| GAIF01029349.1 | 0      | 0      | 0      | 0      | 0.02   | 0.01   |
| GAIF01029351.1 | 0.12   | 0.96   | 0.26   | 0.14   | 0.14   | 0.02   |
| GAIF01029353.1 | 1.24   | 2.7    | 1.51   | 7.68   | 10.28  | 0.15   |
| GAIF01029354.1 | 0      | 0      | 0      | 0.41   | 2      | 0.13   |
| GAIF01029357.1 | 0      | 0      | 0.1    | 0      | 0      | 0      |
| GAIF01029359.1 | 0.12   | 0      | 0      | 1.44   | 5.61   | 0.32   |
| GAIF01029363.1 | 123.72 | 123.47 | 88.27  | 92.75  | 320.97 | 144.95 |
| GAIF01029366.1 | 0      | 0      | 0      | 0.17   | 0.33   | 0.24   |
| GAIF01029367.1 | 11.41  | 11.2   | 14.35  | 44.22  | 28.11  | 16.48  |
| GAIF01029368.1 | 0      | 0      | 0      | 0.08   | 0.13   | 0      |
| GAIF01029369.1 | 0.11   | 0.09   | 0.14   | 0      | 0      | 0      |
| GAIF01029371.1 | 0.05   | 0.08   | 0      | 0      | 0      | 0      |
| GAIF01029372.1 | 10.58  | 14.34  | 6.55   | 33.69  | 26.43  | 2.33   |
| GAIF01029374.1 | 0      | 0      | 0      | 0.05   | 0      | 0      |
| GAIF01029377.1 | 1.52   | 3.87   | 1.49   | 3.98   | 4.69   | 2.48   |
| GAIF01029383.1 | 0.14   | 0.15   | 0      | 0      | 1.83   | 0      |
| GAIF01029386.1 | 45.88  | 23.98  | 42.81  | 166.01 | 423.15 | 171.76 |
| GAIF01029387.1 | 1.81   | 2.85   | 0.44   | 5.96   | 7.76   | 0.11   |
| GAIF01029388.1 | 25.97  | 19.53  | 24.38  | 35.14  | 15.21  | 7.56   |
| GAIF01029389.1 | 0      | 0      | 0      | 0      | 0.1    | 0      |
| GAIF01029391.1 | 62.55  | 95.42  | 139.76 | 103.91 | 55.8   | 50.52  |
| GAIF01029392.1 | 17.2   | 33.25  | 32.86  | 73.6   | 63.57  | 15.94  |
| GAIF01029393.1 | 0      | 0      | 0      | 0.07   | 0.28   | 0      |
| GAIF01029396.1 | 16.93  | 15.63  | 21.98  | 29.54  | 14.09  | 7.75   |
| GAIF01029397.1 | 0      | 0.38   | 0      | 0.21   | 0      | 0      |
| GAIF01029399.1 | 0      | 0      | 0      | 0.13   | 0      | 0      |
| GAIF01029400.1 | 0      | 0.07   | 0.07   | 0.14   | 0.08   | 0      |
| GAIF01029402.1 | 13.61  | 6.87   | 7.19   | 13.3   | 21.04  | 11.62  |
| GAIF01029403.1 | 2.38   | 1.77   | 1.1    | 0.73   | 0.75   | 0.55   |
| GAIF01029404.1 | 0.32   | 0.27   | 0.27   | 4.94   | 4.57   | 0.14   |
| GAIF01029405.1 | 0      | 0.06   | 0      | 0.38   | 0.12   | 0      |
| GAIF01029407.1 | 0.71   | 0.19   | 0.39   | 0.62   | 1.04   | 0.79   |

|                |         |         |         |         |         |         |
|----------------|---------|---------|---------|---------|---------|---------|
| GAIF01029408.1 | 2.82    | 0.14    | 0       | 4.16    | 9.66    | 10.3    |
| GAIF01029409.1 | 46.27   | 8.06    | 0.87    | 74.24   | 222.57  | 29.53   |
| GAIF01029410.1 | 0       | 0.16    | 0       | 0.17    | 2.66    | 0.16    |
| GAIF01029411.1 | 2.45    | 3.5     | 3.19    | 1.95    | 1.29    | 2.36    |
| GAIF01029412.1 | 0.87    | 1.13    | 0.06    | 0.77    | 0.88    | 0       |
| GAIF01029413.1 | 0       | 0       | 0.05    | 0       | 0.11    | 0       |
| GAIF01029414.1 | 0.22    | 0.16    | 0       | 1.26    | 3.49    | 0.08    |
| GAIF01029417.1 | 0.14    | 0       | 0       | 0       | 0.17    | 0       |
| GAIF01029418.1 | 23.43   | 30.28   | 52.08   | 61.1    | 70.96   | 32.96   |
| GAIF01029419.1 | 0       | 0       | 0.02    | 0       | 0       | 0       |
| GAIF01029420.1 | 0       | 0       | 0       | 0.53    | 2.06    | 0       |
| GAIF01029422.1 | 0       | 0       | 0       | 0       | 0.24    | 0       |
| GAIF01029423.1 | 25.81   | 30      | 22.08   | 35.69   | 32.28   | 11.42   |
| GAIF01029425.1 | 2.25    | 3.09    | 7.53    | 4.15    | 5.4     | 0.1     |
| GAIF01029426.1 | 0       | 0       | 0       | 0       | 0.11    | 0.1     |
| GAIF01029428.1 | 0.14    | 11.45   | 49.59   | 0       | 1.44    | 73.93   |
| GAIF01029429.1 | 13.25   | 15.98   | 9.87    | 18.51   | 10.58   | 3.3     |
| GAIF01029430.1 | 0.12    | 0.13    | 0       | 0       | 0.55    | 0       |
| GAIF01029431.1 | 37.31   | 58.6    | 8.45    | 58.1    | 86.61   | 2.02    |
| GAIF01029432.1 | 0.15    | 0       | 0.17    | 1.42    | 6.81    | 0       |
| GAIF01029434.1 | 0.21    | 0.44    | 0.9     | 1.19    | 6.76    | 0.23    |
| GAIF01029436.1 | 0       | 0       | 0       | 0.28    | 0.33    | 0       |
| GAIF01029437.1 | 4051.56 | 3330.68 | 3903.64 | 2332.04 | 1845.32 | 4128.77 |
| GAIF01029438.1 | 0       | 0       | 0       | 0.07    | 0       | 0       |
| GAIF01029439.1 | 0       | 0.01    | 0       | 0       | 1.82    | 0       |
| GAIF01029441.1 | 11.35   | 5.34    | 4.13    | 7.65    | 15.11   | 10.01   |
| GAIF01029442.1 | 0.44    | 0.32    | 0       | 2.81    | 8.39    | 0.24    |
| GAIF01029445.1 | 0.33    | 0.51    | 0.14    | 0       | 1.82    | 0       |
| GAIF01029446.1 | 0.48    | 0.19    | 0       | 2.51    | 6.72    | 0.24    |
| GAIF01029449.1 | 18.34   | 11.71   | 25.12   | 24.8    | 22.56   | 76.02   |
| GAIF01029451.1 | 2.89    | 0.37    | 0       | 22.3    | 77.9    | 3       |
| GAIF01029453.1 | 9.09    | 11.59   | 20.99   | 34.87   | 35.88   | 20.55   |
| GAIF01029457.1 | 0       | 0.02    | 0       | 0       | 0       | 0       |
| GAIF01029460.1 | 19.32   | 20.82   | 25.85   | 37.23   | 44.35   | 10.37   |
| GAIF01029461.1 | 75.94   | 92.05   | 44.11   | 235.4   | 237.42  | 25.01   |
| GAIF01029462.1 | 0.15    | 0       | 0       | 0       | 0.84    | 0       |
| GAIF01029463.1 | 5.9     | 0.23    | 1.36    | 0.36    | 0.12    | 0.11    |
| GAIF01029464.1 | 7.92    | 25.1    | 44.45   | 2.73    | 4.68    | 2.89    |
| GAIF01029465.1 | 0.06    | 0.07    | 0.13    | 0.21    | 0.14    | 0       |
| GAIF01029466.1 | 0       | 0.27    | 0.2     | 0.49    | 1.82    | 0       |
| GAIF01029467.1 | 0       | 0.06    | 0       | 0.12    | 0.25    | 0.06    |
| GAIF01029468.1 | 0       | 0       | 0       | 0       | 0.05    | 0       |
| GAIF01029469.1 | 37.89   | 38.45   | 20.02   | 4.91    | 7.42    | 9.23    |
| GAIF01029470.1 | 0       | 0       | 0       | 0       | 0.17    | 0.79    |



|                |         |         |         |        |       |        |
|----------------|---------|---------|---------|--------|-------|--------|
| GAIF01029471.1 | 0       | 0       | 0       | 0      | 0.37  | 0      |
| GAIF01029473.1 | 0.7     | 0.5     | 0.19    | 26.58  | 22.15 | 19.59  |
| GAIF01029476.1 | 1.32    | 0.93    | 0.58    | 2.67   | 1.74  | 1.38   |
| GAIF01029477.1 | 0.78    | 0.53    | 0.27    | 0.56   | 2.4   | 0.09   |
| GAIF01029478.1 | 23.48   | 30.63   | 31.24   | 30.29  | 27.94 | 50.9   |
| GAIF01029480.1 | 0.12    | 0       | 0       | 0.57   | 3.11  | 0.13   |
| GAIF01029482.1 | 51.43   | 37.19   | 27.75   | 52.43  | 43.16 | 35.49  |
| GAIF01029483.1 | 26.22   | 57.03   | 50.8    | 76.09  | 15.77 | 14.45  |
| GAIF01029485.1 | 0       | 0.01    | 0       | 0      | 0     | 0      |
| GAIF01029486.1 | 0       | 0       | 0       | 0      | 0.05  | 0      |
| GAIF01029488.1 | 0.07    | 0.04    | 0       | 0      | 0     | 0.09   |
| GAIF01029489.1 | 0.12    | 0.07    | 0       | 0      | 0.15  | 0      |
| GAIF01029490.1 | 0.19    | 0.68    | 0.26    | 0      | 0.39  | 0.22   |
| GAIF01029491.1 | 0       | 0.47    | 0       | 1.49   | 0     | 0      |
| GAIF01029492.1 | 1.01    | 1       | 2.88    | 5.29   | 1.69  | 0.65   |
| GAIF01029493.1 | 0       | 0       | 0       | 0      | 0.19  | 0      |
| GAIF01029496.1 | 3.11    | 1.1     | 1.21    | 12.95  | 4.53  | 4.07   |
| GAIF01029498.1 | 0.24    | 0       | 0       | 0      | 0     | 0      |
| GAIF01029499.1 | 25.21   | 19.83   | 6.99    | 83.26  | 74.67 | 4.9    |
| GAIF01029500.1 | 0       | 1.28    | 2.23    | 0      | 0.13  | 0.12   |
| GAIF01029502.1 | 0.61    | 0.3     | 0.48    | 0      | 0     | 0.49   |
| GAIF01029503.1 | 0       | 0.08    | 0       | 0      | 0     | 0      |
| GAIF01029504.1 | 4.05    | 13.21   | 5.52    | 1.3    | 2.35  | 0.31   |
| GAIF01029505.1 | 2.31    | 2.85    | 2.03    | 9.36   | 7.97  | 1.47   |
| GAIF01029507.1 | 0.28    | 0.09    | 0.04    | 1.54   | 5.95  | 0.53   |
| GAIF01029508.1 | 1.9     | 2.67    | 1.21    | 0      | 0.77  | 0.27   |
| GAIF01029511.1 | 0.35    | 0       | 0       | 2.9    | 9.19  | 0.58   |
| GAIF01029512.1 | 0       | 0.11    | 0.21    | 0      | 0.06  | 0      |
| GAIF01029513.1 | 0.14    | 0       | 0       | 0.17   | 0.17  | 0.16   |
| GAIF01029515.1 | 0.05    | 0       | 0.03    | 0      | 0     | 0      |
| GAIF01029517.1 | 1.07    | 0.54    | 1.34    | 0.83   | 0.09  | 1.03   |
| GAIF01029518.1 | 37.59   | 24.78   | 47.12   | 101.94 | 38.15 | 82.11  |
| GAIF01029520.1 | 0       | 0.14    | 0.1     | 0      | 0.05  | 0      |
| GAIF01029521.1 | 1631.07 | 268.96  | 567.82  | 0      | 0     | 135.11 |
| GAIF01029522.1 | 0       | 0.18    | 0       | 2.32   | 5.71  | 0.56   |
| GAIF01029523.1 | 3454.13 | 3041.15 | 5034.64 | 43.33  | 24.52 | 31.09  |
| GAIF01029524.1 | 0       | 0       | 0       | 0.03   | 0     | 0      |
| GAIF01029525.1 | 55.97   | 51.26   | 30.18   | 43.81  | 24.25 | 18.72  |
| GAIF01029526.1 | 0       | 0       | 0       | 0      | 0.43  | 0      |
| GAIF01029527.1 | 9.09    | 4.46    | 7.88    | 9.21   | 7.25  | 10.78  |
| GAIF01029528.1 | 0.19    | 0       | 0       | 1.29   | 6.13  | 0.1    |
| GAIF01029529.1 | 1.19    | 0       | 0       | 0.36   | 2.57  | 2.39   |
| GAIF01029530.1 | 52.83   | 31.71   | 30.9    | 23.82  | 33.58 | 32.48  |
| GAIF01029531.1 | 0       | 0.09    | 0       | 0      | 0.1   | 0.18   |

|                |        |        |        |        |        |         |
|----------------|--------|--------|--------|--------|--------|---------|
| GAIF01029532.1 | 0      | 0      | 0      | 0      | 0.25   | 0       |
| GAIF01029533.1 | 35.76  | 26.76  | 44.42  | 86.34  | 32.09  | 66.18   |
| GAIF01029534.1 | 0.48   | 0      | 2.92   | 2.34   | 1.45   | 1.69    |
| GAIF01029535.1 | 1.05   | 0.26   | 0.16   | 4.92   | 24.22  | 1       |
| GAIF01029536.1 | 6.5    | 3.33   | 0      | 10.48  | 15.34  | 1.05    |
| GAIF01029538.1 | 0      | 0      | 0      | 0      | 0.24   | 0       |
| GAIF01029540.1 | 20.11  | 24.61  | 17.48  | 9.17   | 3.22   | 0       |
| GAIF01029542.1 | 0      | 0      | 0      | 0      | 4.22   | 0       |
| GAIF01029543.1 | 1.37   | 0      | 0      | 4.53   | 2.57   | 0       |
| GAIF01029544.1 | 0.29   | 0.06   | 0      | 0.27   | 1.66   | 0       |
| GAIF01029545.1 | 21.91  | 23.77  | 41.61  | 32.12  | 21.81  | 20.97   |
| GAIF01029546.1 | 0      | 0.04   | 0      | 0      | 0.2    | 0       |
| GAIF01029547.1 | 6.03   | 7.16   | 5.12   | 8.28   | 2.64   | 3.32    |
| GAIF01029548.1 | 6.21   | 3.52   | 9.55   | 4.62   | 2.6    | 3.35    |
| GAIF01029549.1 | 6.12   | 13.53  | 7.9    | 2.14   | 0.7    | 0       |
| GAIF01029550.1 | 0.11   | 0      | 0      | 0      | 0.08   | 0.04    |
| GAIF01029551.1 | 0.03   | 0.03   | 0      | 0      | 0.07   | 0       |
| GAIF01029552.1 | 2.29   | 2.18   | 0.52   | 6.54   | 14.58  | 0.21    |
| GAIF01029553.1 | 0.14   | 0.15   | 0      | 0.16   | 2.8    | 0       |
| GAIF01029554.1 | 0      | 0.06   | 0      | 0.06   | 0      | 0       |
| GAIF01029555.1 | 0      | 0      | 0      | 0.12   | 0      | 0       |
| GAIF01029556.1 | 1.12   | 0.07   | 0      | 2.44   | 12.07  | 6.79    |
| GAIF01029557.1 | 0.01   | 0      | 0.13   | 0      | 0.12   | 0       |
| GAIF01029559.1 | 0.52   | 0.6    | 0.97   | 0      | 0      | 0.28    |
| GAIF01029560.1 | 15.06  | 10.92  | 6.24   | 36.14  | 34.97  | 1.97    |
| GAIF01029561.1 | 0      | 0      | 0.26   | 0      | 0      | 0       |
| GAIF01029562.1 | 0      | 0      | 0      | 0      | 0.14   | 0       |
| GAIF01029563.1 | 2.6    | 1.58   | 7.29   | 1.46   | 1.16   | 2.79    |
| GAIF01029564.1 | 9.31   | 4.4    | 2.53   | 45.25  | 51.3   | 1.43    |
| GAIF01029568.1 | 2.12   | 3.58   | 1.67   | 4.96   | 3.66   | 0.45    |
| GAIF01029570.1 | 38.93  | 40.39  | 29.44  | 55.18  | 36.77  | 24.31   |
| GAIF01029571.1 | 0      | 6.44   | 5.48   | 0      | 0      | 0.96    |
| GAIF01029572.1 | 0.14   | 0      | 0      | 0.58   | 1.09   | 0.38    |
| GAIF01029574.1 | 175.29 | 84.05  | 130.81 | 17.46  | 12.11  | 13.98   |
| GAIF01029575.1 | 0.47   | 0.68   | 0      | 0.36   | 0      | 0       |
| GAIF01029576.1 | 21.29  | 20.03  | 19.57  | 44.42  | 21.14  | 8.83    |
| GAIF01029578.1 | 2.76   | 0.9    | 0.91   | 3.74   | 11.15  | 48.8    |
| GAIF01029579.1 | 1.41   | 1.44   | 1.45   | 5.63   | 11.35  | 1.75    |
| GAIF01029580.1 | 0      | 0      | 0      | 0      | 0.27   | 0       |
| GAIF01029581.1 | 9.57   | 19.27  | 7.16   | 23.01  | 17.06  | 1.5     |
| GAIF01029582.1 | 496.46 | 409.93 | 468.15 | 0      | 0.96   | 0.14    |
| GAIF01029583.1 | 1021.9 | 518.8  | 633.05 | 198.55 | 245.87 | 1638.25 |
| GAIF01029585.1 | 1.74   | 1.59   | 1.19   | 7.76   | 9.85   | 0       |
| GAIF01029588.1 | 9.39   | 9.53   | 1.95   | 5.57   | 2.13   | 0       |

|                |        |        |        |        |       |        |
|----------------|--------|--------|--------|--------|-------|--------|
| GAIF01029589.1 | 18.12  | 10.59  | 12.06  | 25.69  | 29.41 | 3.15   |
| GAIF01029590.1 | 0      | 0      | 2.27   | 0      | 0     | 0.55   |
| GAIF01029593.1 | 0      | 0      | 0      | 0.01   | 0.06  | 0      |
| GAIF01029594.1 | 3.73   | 10.43  | 7.84   | 9.77   | 5.83  | 1      |
| GAIF01029595.1 | 0      | 0      | 0.38   | 0      | 0     | 0      |
| GAIF01029596.1 | 0      | 2.1    | 1.48   | 0      | 0     | 0.43   |
| GAIF01029598.1 | 0.14   | 0      | 0.32   | 0      | 0     | 0      |
| GAIF01029599.1 | 3.09   | 0.49   | 0.17   | 2.51   | 4.27  | 0.85   |
| GAIF01029601.1 | 1.92   | 1.46   | 1.27   | 4.8    | 2.31  | 0.64   |
| GAIF01029603.1 | 1.89   | 0.35   | 0.93   | 5.27   | 0     | 0.39   |
| GAIF01029604.1 | 0      | 0      | 0      | 0.19   | 0.46  | 0.06   |
| GAIF01029605.1 | 15.4   | 16.24  | 26.27  | 33.91  | 20.52 | 28.52  |
| GAIF01029606.1 | 0.2    | 0.21   | 0.22   | 1.48   | 5.42  | 0.32   |
| GAIF01029608.1 | 0.41   | 0.17   | 0      | 0.23   | 0     | 0.53   |
| GAIF01029610.1 | 1.31   | 0      | 0      | 1.33   | 9.84  | 0.54   |
| GAIF01029611.1 | 0.18   | 0.68   | 0      | 0.32   | 0     | 0      |
| GAIF01029612.1 | 0      | 0.01   | 0      | 0      | 0     | 0.01   |
| GAIF01029613.1 | 1.91   | 1.86   | 0      | 0.93   | 1.09  | 0      |
| GAIF01029614.1 | 1.39   | 1.81   | 0      | 0.48   | 0.33  | 0      |
| GAIF01029615.1 | 731.33 | 554.64 | 655.36 | 29.31  | 14.39 | 11.17  |
| GAIF01029616.1 | 83.58  | 85.41  | 56.38  | 102.17 | 82.8  | 136.73 |
| GAIF01029617.1 | 41.04  | 0.01   | 1.93   | 41.26  | 46.54 | 22.5   |
| GAIF01029619.1 | 5.82   | 6.76   | 3.93   | 9.16   | 8.53  | 0.57   |
| GAIF01029620.1 | 0      | 0      | 0      | 0      | 0.16  | 0.09   |
| GAIF01029621.1 | 0.17   | 0.07   | 0      | 0.41   | 0.07  | 0      |
| GAIF01029624.1 | 0.11   | 0      | 0      | 0.08   | 0.22  | 0      |
| GAIF01029625.1 | 0      | 0      | 0      | 0      | 0.26  | 0      |
| GAIF01029626.1 | 0      | 0      | 0.03   | 0.07   | 0     | 0      |
| GAIF01029627.1 | 0.6    | 0.39   | 0.13   | 0.84   | 0.43  | 0.13   |
| GAIF01029629.1 | 11.32  | 1.77   | 2.68   | 11.88  | 26.09 | 11.21  |
| GAIF01029630.1 | 0      | 0      | 0      | 0      | 0.13  | 0      |
| GAIF01029631.1 | 60.12  | 44.77  | 31.97  | 81.36  | 93.03 | 13.37  |
| GAIF01029632.1 | 9.52   | 10.04  | 5.54   | 19.96  | 14.91 | 1.72   |
| GAIF01029633.1 | 0.13   | 0      | 0      | 0.13   | 0.36  | 0      |
| GAIF01029634.1 | 0      | 0      | 0      | 1.4    | 0     | 0      |
| GAIF01029635.1 | 17.1   | 6.05   | 4.85   | 24.93  | 20.01 | 13.2   |
| GAIF01029637.1 | 0.02   | 0.03   | 0      | 0.38   | 2.78  | 0.05   |
| GAIF01029638.1 | 0.84   | 0      | 0      | 0.73   | 2.54  | 1.4    |
| GAIF01029639.1 | 92.27  | 62.18  | 54     | 61.93  | 92.12 | 41.06  |
| GAIF01029643.1 | 0      | 0.51   | 0      | 0.27   | 0.14  | 0.52   |
| GAIF01029644.1 | 0      | 0.07   | 0.2    | 0      | 0     | 0      |
| GAIF01029645.1 | 0      | 0      | 0      | 0      | 0.04  | 0      |
| GAIF01029646.1 | 0      | 0      | 0      | 0      | 0.13  | 0      |
| GAIF01029647.1 | 0      | 0      | 0      | 0      | 0.02  | 0      |

|                |       |        |       |        |        |       |
|----------------|-------|--------|-------|--------|--------|-------|
| GAIF01029648.1 | 0     | 0      | 0.32  | 0      | 0.13   | 0.17  |
| GAIF01029653.1 | 14.9  | 15.41  | 7.19  | 10.42  | 11.53  | 0.99  |
| GAIF01029654.1 | 1.26  | 0.34   | 0     | 9.13   | 33.66  | 1.04  |
| GAIF01029657.1 | 0     | 0      | 0.55  | 0      | 0      | 0     |
| GAIF01029658.1 | 0     | 0.48   | 0.75  | 0.6    | 3.03   | 0.42  |
| GAIF01029659.1 | 1.62  | 3.1    | 0.38  | 9.81   | 18.86  | 0.1   |
| GAIF01029660.1 | 0.15  | 0      | 0     | 0.09   | 1.24   | 0     |
| GAIF01029661.1 | 1.88  | 1.71   | 2.85  | 5.64   | 5.23   | 2.77  |
| GAIF01029662.1 | 1.68  | 0.55   | 0.65  | 1.23   | 1.32   | 0.39  |
| GAIF01029663.1 | 24.5  | 47.03  | 13.74 | 54.51  | 59.85  | 2.03  |
| GAIF01029664.1 | 0.3   | 0      | 0     | 0      | 0.78   | 0     |
| GAIF01029665.1 | 66.89 | 103.15 | 23.27 | 242.26 | 159.28 | 5.21  |
| GAIF01029668.1 | 4.58  | 4.99   | 3.59  | 17.69  | 16.92  | 2.49  |
| GAIF01029669.1 | 34.78 | 31.8   | 23.74 | 10.39  | 6.53   | 17.53 |
| GAIF01029670.1 | 0.79  | 0.54   | 0.36  | 0.13   | 0.76   | 0.29  |
| GAIF01029672.1 | 10.83 | 15.97  | 25.9  | 4.3    | 5.71   | 1.64  |
| GAIF01029675.1 | 44.05 | 53     | 68.78 | 138.64 | 57.61  | 33.36 |
| GAIF01029676.1 | 14.59 | 17.77  | 20.11 | 71.74  | 66.3   | 12.65 |
| GAIF01029678.1 | 0.29  | 0.14   | 0     | 0.48   | 1.1    | 0     |
| GAIF01029679.1 | 11.86 | 9.08   | 8.12  | 3.84   | 5.65   | 1.54  |
| GAIF01029680.1 | 0     | 0      | 0.3   | 0      | 0.11   | 0     |
| GAIF01029681.1 | 76.87 | 36.46  | 18.89 | 118.55 | 58.76  | 5.94  |
| GAIF01029682.1 | 2.35  | 2.84   | 1.21  | 24.43  | 33.77  | 7.3   |
| GAIF01029683.1 | 3.46  | 1.5    | 2.66  | 1.81   | 0.21   | 1.33  |
| GAIF01029684.1 | 0     | 0      | 0     | 0.87   | 1.01   | 0     |
| GAIF01029685.1 | 1.28  | 2.31   | 0.47  | 1.88   | 1.84   | 0     |
| GAIF01029686.1 | 18    | 24.26  | 24.78 | 36.66  | 46.87  | 31.06 |
| GAIF01029688.1 | 59.73 | 61.92  | 70.29 | 105.17 | 61.64  | 54.06 |
| GAIF01029690.1 | 0     | 0      | 0     | 0      | 0.12   | 0     |
| GAIF01029692.1 | 0     | 0      | 0     | 0      | 0.44   | 0.4   |
| GAIF01029693.1 | 0.33  | 0      | 0     | 0.15   | 2.27   | 0.14  |
| GAIF01029694.1 | 0.26  | 0.3    | 0.14  | 0.75   | 0.66   | 0.17  |
| GAIF01029695.1 | 0     | 0      | 0     | 0      | 0      | 0.02  |
| GAIF01029696.1 | 12.73 | 42.57  | 62.44 | 28.42  | 20.35  | 11.19 |
| GAIF01029697.1 | 9.31  | 7.98   | 3.05  | 3.18   | 4.39   | 0.11  |
| GAIF01029698.1 | 0     | 0      | 0.17  | 0      | 0      | 0     |
| GAIF01029699.1 | 0.17  | 0      | 0.18  | 0.32   | 2.35   | 0     |
| GAIF01029700.1 | 4.39  | 9.14   | 13.48 | 17.52  | 0      | 0.91  |
| GAIF01029701.1 | 41.6  | 75     | 35.61 | 109.88 | 112.77 | 7.88  |
| GAIF01029704.1 | 1.35  | 0.29   | 0.36  | 1.12   | 0.68   | 0.03  |
| GAIF01029705.1 | 0.04  | 0      | 0     | 0.04   | 0.09   | 0.04  |
| GAIF01029706.1 | 0     | 0      | 0.18  | 0      | 0.43   | 0     |
| GAIF01029710.1 | 22.45 | 9.33   | 5.68  | 16.89  | 12.37  | 11.18 |
| GAIF01029712.1 | 0.41  | 0.03   | 0.04  | 2.63   | 9.67   | 1.2   |

|                |        |        |        |        |        |        |
|----------------|--------|--------|--------|--------|--------|--------|
| GAIF01029716.1 | 0.89   | 0.31   | 0.08   | 0.78   | 1.82   | 1.57   |
| GAIF01029718.1 | 10.17  | 10.28  | 11.41  | 56.57  | 56.76  | 12.38  |
| GAIF01029719.1 | 0      | 0.3    | 0      | 0.16   | 0      | 0      |
| GAIF01029720.1 | 0      | 6.48   | 0      | 2.03   | 4.66   | 0      |
| GAIF01029722.1 | 0      | 0      | 0.21   | 0      | 0      | 0      |
| GAIF01029723.1 | 0      | 0      | 0.07   | 0      | 0      | 0.15   |
| GAIF01029724.1 | 0      | 0      | 0      | 0      | 0.02   | 0      |
| GAIF01029726.1 | 15.57  | 11.63  | 3.36   | 76.21  | 82.01  | 4.38   |
| GAIF01029729.1 | 7.47   | 0.94   | 0      | 28.7   | 53.92  | 3.84   |
| GAIF01029730.1 | 0.23   | 0.13   | 0      | 0.41   | 1.27   | 0.26   |
| GAIF01029731.1 | 304.43 | 365.14 | 441.89 | 247.33 | 154.08 | 148.92 |
| GAIF01029732.1 | 0      | 0      | 0      | 0.86   | 5.81   | 0.28   |
| GAIF01029733.1 | 0      | 0      | 0.11   | 0      | 0      | 0      |
| GAIF01029734.1 | 0      | 0      | 0      | 0      | 0      | 0.18   |
| GAIF01029735.1 | 0      | 0      | 0      | 0      | 0.28   | 0      |
| GAIF01029739.1 | 1.09   | 0.37   | 0      | 5.66   | 25.49  | 0.19   |
| GAIF01029740.1 | 29.43  | 52.27  | 39.68  | 30.92  | 28.03  | 7.93   |
| GAIF01029741.1 | 17.11  | 17.13  | 6.18   | 5.1    | 4.97   | 0.26   |
| GAIF01029742.1 | 0      | 0      | 0.1    | 0      | 0.23   | 0      |
| GAIF01029743.1 | 5.51   | 1.54   | 0      | 9.76   | 32.79  | 0.39   |
| GAIF01029744.1 | 0.95   | 0.62   | 0      | 6.65   | 17.87  | 0.58   |
| GAIF01029745.1 | 1.27   | 0.99   | 0.4    | 2.14   | 4.57   | 0.51   |
| GAIF01029746.1 | 0.25   | 0.81   | 0      | 2.29   | 1.19   | 0.27   |
| GAIF01029747.1 | 0.03   | 0.03   | 0      | 0      | 0      | 0      |
| GAIF01029748.1 | 8.17   | 2.94   | 0      | 6.51   | 8.65   | 1.88   |
| GAIF01029749.1 | 0.06   | 0      | 0      | 0.7    | 3.43   | 0      |
| GAIF01029750.1 | 192.5  | 149.58 | 154.41 | 421.95 | 381.47 | 358.93 |
| GAIF01029751.1 | 0      | 0      | 0.05   | 0.14   | 0.05   | 0.13   |
| GAIF01029752.1 | 0      | 0      | 0      | 0.06   | 0      | 0      |
| GAIF01029753.1 | 0.59   | 0.25   | 0.11   | 2.52   | 6.61   | 4.86   |
| GAIF01029754.1 | 0.1    | 0.22   | 0.15   | 0.04   | 0      | 0      |
| GAIF01029755.1 | 0      | 0      | 0      | 0.08   | 0      | 0      |
| GAIF01029756.1 | 0.61   | 0.84   | 0.09   | 0.85   | 1.61   | 0      |
| GAIF01029757.1 | 2.84   | 1.57   | 2.49   | 8.56   | 16.33  | 1.06   |
| GAIF01029758.1 | 0.22   | 0.42   | 0.36   | 0.06   | 0.07   | 0.48   |
| GAIF01029760.1 | 0      | 0      | 0      | 0      | 0.23   | 0      |
| GAIF01029761.1 | 0.36   | 0.13   | 0      | 0.14   | 0.14   | 0      |
| GAIF01029762.1 | 1.08   | 0.64   | 0.41   | 1.08   | 2.2    | 0.81   |
| GAIF01029764.1 | 0      | 0.14   | 0      | 0      | 0      | 0      |
| GAIF01029765.1 | 8.22   | 0      | 0      | 12.95  | 4.69   | 2.82   |
| GAIF01029766.1 | 2.57   | 1.31   | 2.6    | 0.23   | 0.06   | 0.33   |
| GAIF01029767.1 | 0.18   | 0      | 0.2    | 0.32   | 0.22   | 0      |
| GAIF01029769.1 | 57.41  | 102.71 | 76.11  | 22.05  | 19.32  | 9.03   |
| GAIF01029770.1 | 0      | 0      | 3.68   | 0      | 0.26   | 0      |

|                |         |        |        |         |         |         |
|----------------|---------|--------|--------|---------|---------|---------|
| GAIF01029772.1 | 7.24    | 5.03   | 6.64   | 16.43   | 20.4    | 5.94    |
| GAIF01029773.1 | 18.6    | 15.09  | 12.87  | 52.61   | 52.11   | 4.71    |
| GAIF01029774.1 | 7.45    | 9.85   | 7.02   | 25.74   | 16.68   | 2.77    |
| GAIF01029775.1 | 8.37    | 3.44   | 3.47   | 10.52   | 7.91    | 42.64   |
| GAIF01029776.1 | 0       | 0.04   | 0.15   | 1.88    | 12.69   | 0.17    |
| GAIF01029777.1 | 0       | 0      | 0      | 0       | 0.16    | 0       |
| GAIF01029778.1 | 0       | 0      | 0.05   | 0       | 1.35    | 0.49    |
| GAIF01029779.1 | 0.04    | 0.13   | 0      | 0.42    | 0       | 0.07    |
| GAIF01029780.1 | 0.2     | 0.05   | 0.05   | 0       | 0       | 0       |
| GAIF01029784.1 | 0       | 0      | 0      | 0       | 0.35    | 0       |
| GAIF01029786.1 | 0       | 0.08   | 0      | 0       | 0       | 0       |
| GAIF01029789.1 | 27.52   | 29.23  | 23.99  | 84.7    | 83.99   | 28.54   |
| GAIF01029790.1 | 0       | 0      | 0      | 0.08    | 0.08    | 0       |
| GAIF01029792.1 | 0.07    | 0.29   | 0      | 0.08    | 0       | 0.07    |
| GAIF01029793.1 | 0.1     | 0.34   | 0.11   | 0.85    | 3.26    | 0.35    |
| GAIF01029794.1 | 0.09    | 0.1    | 0      | 0.21    | 0.43    | 0       |
| GAIF01029795.1 | 1.99    | 0.71   | 0      | 3.48    | 2.77    | 0.72    |
| GAIF01029796.1 | 0       | 0.47   | 0      | 2.02    | 10.15   | 1.2     |
| GAIF01029797.1 | 2.4     | 1.83   | 0.75   | 1.7     | 3.83    | 0.52    |
| GAIF01029801.1 | 2816.83 | 536.63 | 354.26 | 1596.34 | 1833.89 | 1458.29 |
| GAIF01029802.1 | 60.15   | 37.92  | 57.12  | 55.78   | 0       | 76.8    |
| GAIF01029803.1 | 0       | 0      | 0      | 0       | 0.82    | 0       |
| GAIF01029804.1 | 89.25   | 44.74  | 62.99  | 11.43   | 5.85    | 8.94    |
| GAIF01029805.1 | 18.95   | 16.54  | 23.55  | 24.17   | 31.89   | 6.02    |
| GAIF01029806.1 | 0       | 0      | 0      | 0       | 0       | 0.17    |
| GAIF01029808.1 | 0.2     | 0.13   | 0      | 0.73    | 2.83    | 0       |
| GAIF01029809.1 | 13.77   | 15.29  | 7.94   | 31.54   | 25.04   | 7.97    |
| GAIF01029810.1 | 0       | 0.31   | 0.62   | 0       | 0       | 0       |
| GAIF01029811.1 | 79.48   | 74.84  | 86.3   | 65.9    | 62.52   | 61.08   |
| GAIF01029812.1 | 68.99   | 36.66  | 44.49  | 57.06   | 75.54   | 75.71   |
| GAIF01029814.1 | 0       | 0.07   | 0      | 0.12    | 0.56    | 0       |
| GAIF01029815.1 | 18.49   | 18.61  | 36.95  | 62.33   | 62.36   | 30.7    |
| GAIF01029816.1 | 24.26   | 18.77  | 27.78  | 21.56   | 21.09   | 8.96    |
| GAIF01029817.1 | 0       | 0      | 0      | 0       | 0.01    | 0       |
| GAIF01029818.1 | 1.36    | 0.92   | 2.1    | 0.59    | 0.61    | 0.93    |
| GAIF01029820.1 | 21.87   | 14.51  | 25.37  | 43.59   | 32.69   | 53.65   |
| GAIF01029822.1 | 205.38  | 70.27  | 26.84  | 34.64   | 31.78   | 0.93    |
| GAIF01029825.1 | 3.44    | 4.64   | 0.69   | 7.25    | 6.89    | 0.11    |
| GAIF01029826.1 | 4.84    | 0      | 0      | 8.76    | 2.02    | 1       |
| GAIF01029827.1 | 12.22   | 13.02  | 17.35  | 47.18   | 65.05   | 7.66    |
| GAIF01029828.1 | 0       | 0      | 0      | 0       | 0.97    | 0.17    |
| GAIF01029829.1 | 1.95    | 0      | 0      | 3.76    | 7.21    | 1.43    |
| GAIF01029830.1 | 0.26    | 0      | 1.97   | 0.3     | 0       | 0.28    |
| GAIF01029831.1 | 0.27    | 0.12   | 0.13   | 1.59    | 5.15    | 0       |

|                |        |        |        |        |        |        |
|----------------|--------|--------|--------|--------|--------|--------|
| GAIF01029832.1 | 0      | 0      | 0.04   | 0      | 0.08   | 0      |
| GAIF01029833.1 | 33.31  | 21.08  | 10     | 36.19  | 23.46  | 63.28  |
| GAIF01029834.1 | 11.15  | 5.68   | 5.65   | 34.13  | 20.9   | 17.97  |
| GAIF01029835.1 | 0.53   | 0.31   | 0.05   | 0.11   | 0.75   | 0.11   |
| GAIF01029836.1 | 0      | 1.3    | 0      | 0      | 0.83   | 0      |
| GAIF01029837.1 | 0      | 0      | 0      | 0      | 1.61   | 1.33   |
| GAIF01029838.1 | 11.24  | 9.71   | 9.13   | 30.87  | 9.78   | 7.13   |
| GAIF01029840.1 | 0      | 0.18   | 0      | 0.72   | 7.4    | 0      |
| GAIF01029843.1 | 0      | 0.14   | 0      | 0.4    | 1.86   | 0.09   |
| GAIF01029844.1 | 0      | 0.09   | 0      | 0      | 0.1    | 0      |
| GAIF01029846.1 | 9.64   | 8.44   | 9.16   | 27.24  | 17.7   | 39.45  |
| GAIF01029847.1 | 0      | 0.02   | 0      | 0      | 0      | 0      |
| GAIF01029848.1 | 1.85   | 2.11   | 0.74   | 0.94   | 11.38  | 0.84   |
| GAIF01029849.1 | 12.22  | 7.63   | 9.22   | 28.52  | 40.42  | 10.37  |
| GAIF01029850.1 | 0.1    | 0.09   | 0      | 0.24   | 3.11   | 0      |
| GAIF01029851.1 | 32.62  | 30.58  | 8.49   | 36.72  | 72.06  | 69.62  |
| GAIF01029853.1 | 0.21   | 0.11   | 0.45   | 0      | 0.12   | 0      |
| GAIF01029854.1 | 0.5    | 1.09   | 0.55   | 3.5    | 4.84   | 0      |
| GAIF01029855.1 | 25.21  | 43.12  | 22.41  | 51.97  | 49.6   | 9.54   |
| GAIF01029856.1 | 0      | 0      | 0      | 0.06   | 0      | 0      |
| GAIF01029857.1 | 0.12   | 0.35   | 0      | 0.53   | 3.78   | 0.21   |
| GAIF01029858.1 | 0      | 0.03   | 0      | 0.03   | 0.07   | 0      |
| GAIF01029859.1 | 0      | 0      | 0      | 0      | 0.17   | 0      |
| GAIF01029863.1 | 0      | 0.14   | 0      | 0.45   | 2.64   | 0      |
| GAIF01029864.1 | 0      | 0.48   | 0      | 1.16   | 2.54   | 0.88   |
| GAIF01029865.1 | 124.22 | 156.12 | 202.42 | 472.19 | 259.29 | 61.29  |
| GAIF01029866.1 | 0.07   | 1.45   | 1.33   | 0.15   | 0.16   | 0.47   |
| GAIF01029867.1 | 0.51   | 0.21   | 0.09   | 3.76   | 14.28  | 0.17   |
| GAIF01029868.1 | 11.37  | 13.06  | 5.45   | 14.87  | 17.33  | 0.88   |
| GAIF01029872.1 | 38.42  | 9.75   | 13     | 13.82  | 83.65  | 240.58 |
| GAIF01029873.1 | 0.34   | 0.09   | 0.47   | 0.1    | 0.21   | 0      |
| GAIF01029874.1 | 73.98  | 83.87  | 82.41  | 116.12 | 122.57 | 31.47  |
| GAIF01029875.1 | 0      | 0      | 0      | 0      | 1.19   | 0.22   |
| GAIF01029876.1 | 0      | 0      | 0      | 0      | 0.4    | 0      |
| GAIF01029877.1 | 1.42   | 1.11   | 0.17   | 0.46   | 0.19   | 0      |
| GAIF01029878.1 | 1.07   | 0.95   | 0.11   | 10.17  | 36.08  | 0      |
| GAIF01029879.1 | 0      | 0      | 0      | 1.25   | 6.21   | 0.71   |
| GAIF01029880.1 | 0.14   | 0.03   | 0.16   | 0.51   | 0.31   | 0.45   |
| GAIF01029881.1 | 2.38   | 1.3    | 1.24   | 2.13   | 2.54   | 0.85   |
| GAIF01029883.1 | 0      | 0      | 0      | 0.15   | 0.4    | 0      |
| GAIF01029885.1 | 1.14   | 4.5    | 0      | 0      | 0      | 0      |
| GAIF01029887.1 | 111.39 | 246.22 | 115.47 | 123.24 | 376.37 | 16.15  |
| GAIF01029889.1 | 39     | 33.71  | 8.87   | 104.04 | 102.18 | 2.7    |
| GAIF01029890.1 | 0      | 0.73   | 0.11   | 0      | 0      | 0      |

|                |        |       |       |        |        |        |
|----------------|--------|-------|-------|--------|--------|--------|
| GAIF01029891.1 | 0.3    | 0.21  | 0     | 0.92   | 3.09   | 0.11   |
| GAIF01029892.1 | 9.99   | 6.92  | 7.96  | 20.39  | 26.46  | 13.7   |
| GAIF01029894.1 | 0      | 1.47  | 0.95  | 0      | 0.15   | 0      |
| GAIF01029895.1 | 0.14   | 0.16  | 0     | 0      | 1.42   | 0.16   |
| GAIF01029897.1 | 161.47 | 72.69 | 71.64 | 162.43 | 223.55 | 676.05 |
| GAIF01029901.1 | 10.97  | 12.24 | 13.39 | 40.25  | 37.46  | 10.57  |
| GAIF01029904.1 | 1.72   | 0.87  | 0     | 18.3   | 88.09  | 1.4    |
| GAIF01029905.1 | 5.52   | 3.29  | 11.32 | 5.53   | 0.24   | 2.62   |
| GAIF01029906.1 | 0.14   | 0.16  | 0     | 0.5    | 1.89   | 0.32   |
| GAIF01029908.1 | 9.61   | 7.61  | 7.74  | 29.94  | 37.21  | 3.31   |
| GAIF01029909.1 | 0      | 1.02  | 1.99  | 0      | 0      | 0.58   |
| GAIF01029910.1 | 0      | 0     | 0     | 0      | 0.69   | 0      |
| GAIF01029912.1 | 0.26   | 0.06  | 0.28  | 0.36   | 1.67   | 0      |
| GAIF01029913.1 | 0.1    | 0     | 0     | 0.18   | 0.32   | 0      |
| GAIF01029914.1 | 0      | 0     | 0     | 0.03   | 0      | 0      |
| GAIF01029915.1 | 17.88  | 25.26 | 13.16 | 63.46  | 35.64  | 7.57   |
| GAIF01029917.1 | 0      | 1.07  | 1.25  | 1.05   | 0      | 0      |
| GAIF01029918.1 | 1.14   | 2.18  | 0.89  | 1.82   | 1.43   | 0.3    |
| GAIF01029919.1 | 0.74   | 2.13  | 0.01  | 1.2    | 0.78   | 1.22   |
| GAIF01029921.1 | 0      | 0.09  | 0.19  | 0.2    | 0.2    | 0      |
| GAIF01029922.1 | 17.68  | 8.75  | 7.18  | 54.49  | 71.51  | 19.77  |
| GAIF01029923.1 | 0      | 0     | 0     | 2.92   | 7.06   | 0      |
| GAIF01029924.1 | 18.36  | 33.69 | 45.78 | 95.36  | 90.61  | 21.96  |
| GAIF01029925.1 | 5.04   | 3.03  | 3.96  | 6.38   | 5.98   | 5.42   |
| GAIF01029926.1 | 0      | 0     | 0     | 0.48   | 1.36   | 0.45   |
| GAIF01029927.1 | 0      | 22.48 | 15.79 | 36.2   | 40.96  | 15.1   |
| GAIF01029929.1 | 0      | 0     | 0     | 0      | 0.12   | 0      |
| GAIF01029930.1 | 0      | 0     | 0     | 0      | 0.06   | 0      |
| GAIF01029931.1 | 0      | 0.12  | 0.25  | 0.78   | 2.56   | 0.25   |
| GAIF01029932.1 | 33.11  | 25.78 | 29.95 | 88.14  | 43.72  | 22.09  |
| GAIF01029933.1 | 0.3    | 0.13  | 0.2   | 0      | 0.15   | 0.13   |
| GAIF01029934.1 | 0.13   | 0.14  | 0     | 0.15   | 0.62   | 0      |
| GAIF01029935.1 | 14.1   | 8.71  | 6.1   | 22.25  | 6.23   | 1.55   |
| GAIF01029936.1 | 26.7   | 20.56 | 11.76 | 79.1   | 51.58  | 6.16   |
| GAIF01029938.1 | 44.17  | 33.63 | 31.88 | 199.46 | 109.2  | 38.99  |
| GAIF01029941.1 | 0.12   | 0     | 0     | 0.87   | 0      | 0.14   |
| GAIF01029943.1 | 23.19  | 34.48 | 25.99 | 40.01  | 27.69  | 5.45   |
| GAIF01029944.1 | 0.06   | 0     | 0     | 0      | 0      | 0      |
| GAIF01029945.1 | 0.19   | 0.1   | 0     | 1.65   | 4.98   | 0.1    |
| GAIF01029946.1 | 3.15   | 5.87  | 3.07  | 2.6    | 0      | 4.15   |
| GAIF01029949.1 | 0      | 0     | 0     | 0.98   | 0      | 0      |
| GAIF01029950.1 | 0.13   | 0.07  | 0     | 0.37   | 0.76   | 0.07   |
| GAIF01029951.1 | 0      | 0.12  | 0     | 0.12   | 2.3    | 0      |
| GAIF01029952.1 | 6.6    | 2.7   | 4.41  | 13.1   | 7.7    | 8.11   |



|                |       |       |       |        |        |        |
|----------------|-------|-------|-------|--------|--------|--------|
| GAIF01029953.1 | 0     | 0     | 0     | 0.06   | 0.06   | 0      |
| GAIF01029954.1 | 3.6   | 3.19  | 0.68  | 16.29  | 25.91  | 0.26   |
| GAIF01029956.1 | 0     | 0     | 0     | 0      | 0.62   | 1.24   |
| GAIF01029957.1 | 1.95  | 0     | 3.27  | 8.06   | 20.47  | 1.35   |
| GAIF01029958.1 | 1.62  | 1.33  | 0.9   | 1.68   | 2.15   | 0.22   |
| GAIF01029959.1 | 0     | 0     | 0     | 0      | 0      | 0.07   |
| GAIF01029961.1 | 0.12  | 0     | 0     | 0      | 0      | 0      |
| GAIF01029962.1 | 0     | 0     | 0     | 0      | 0.48   | 0      |
| GAIF01029963.1 | 0     | 0.06  | 0     | 0      | 0      | 0      |
| GAIF01029964.1 | 0     | 0.07  | 0.8   | 0.08   | 0      | 0.07   |
| GAIF01029965.1 | 0.22  | 0.12  | 0     | 1.65   | 8.94   | 0      |
| GAIF01029966.1 | 0     | 0     | 0     | 0.19   | 0      | 0.06   |
| GAIF01029968.1 | 0.18  | 0     | 0     | 0.21   | 0      | 0      |
| GAIF01029969.1 | 1.56  | 0.81  | 0     | 11.78  | 15.99  | 0      |
| GAIF01029970.1 | 0.04  | 0     | 0     | 0      | 0      | 0      |
| GAIF01029971.1 | 26.48 | 18.33 | 12.72 | 21.52  | 0.61   | 25.02  |
| GAIF01029972.1 | 16    | 4.86  | 4.97  | 20.63  | 12.16  | 4.05   |
| GAIF01029973.1 | 16.3  | 16.12 | 33.56 | 58.18  | 41.81  | 55.03  |
| GAIF01029974.1 | 199.5 | 28.53 | 84.47 | 118.25 | 76.11  | 86.72  |
| GAIF01029975.1 | 0.21  | 0     | 0     | 0.73   | 2.54   | 0      |
| GAIF01029977.1 | 13.78 | 19.51 | 19.01 | 7.48   | 7.45   | 16.16  |
| GAIF01029978.1 | 37.29 | 38.25 | 21.89 | 60.59  | 35.22  | 6.13   |
| GAIF01029981.1 | 0     | 0     | 0     | 0      | 0.05   | 0      |
| GAIF01029983.1 | 0.31  | 0     | 0     | 0      | 0      | 0      |
| GAIF01029984.1 | 0.08  | 0.06  | 0     | 0.76   | 2.18   | 0.17   |
| GAIF01029985.1 | 10.09 | 9.57  | 5.58  | 33.45  | 28.18  | 5.02   |
| GAIF01029987.1 | 0.5   | 1.62  | 1.09  | 2.68   | 0.79   | 0.18   |
| GAIF01029988.1 | 0.12  | 0.14  | 0     | 0.29   | 0.12   | 0      |
| GAIF01029991.1 | 0.1   | 0.04  | 0     | 0.27   | 3.38   | 0.04   |
| GAIF01029993.1 | 0.45  | 0.06  | 0     | 0.19   | 1.75   | 0      |
| GAIF01029995.1 | 0     | 0     | 0     | 0.02   | 0.14   | 0      |
| GAIF01029996.1 | 37.5  | 14.99 | 24.82 | 50.82  | 22.68  | 217.71 |
| GAIF01029997.1 | 0     | 0     | 0     | 0      | 0.04   | 0      |
| GAIF01029998.1 | 21.53 | 29.43 | 20.28 | 32.76  | 32.09  | 6.43   |
| GAIF01029999.1 | 0     | 0.19  | 0     | 0      | 0.21   | 0.19   |
| GAIF01030000.1 | 53.75 | 95.69 | 99.8  | 144.21 | 133.05 | 20.91  |
| GAIF01030001.1 | 9.8   | 7.49  | 4.36  | 48.92  | 53.76  | 9.93   |
| GAIF01030002.1 | 2.91  | 0.69  | 0.5   | 8.34   | 21.12  | 0.4    |
| GAIF01030003.1 | 50.12 | 24.95 | 23.16 | 27.75  | 16.98  | 12.19  |
| GAIF01030004.1 | 6.34  | 8.35  | 11.39 | 5.82   | 3.94   | 3.96   |
| GAIF01030005.1 | 0     | 0     | 0     | 0.06   | 0.26   | 0      |
| GAIF01030006.1 | 0.09  | 0     | 0     | 0.99   | 4.53   | 0.09   |
| GAIF01030009.1 | 0.38  | 1.27  | 0     | 1.11   | 1.65   | 0      |
| GAIF01030011.1 | 2.17  | 1.59  | 1.33  | 1.31   | 1.81   | 0.41   |

|                |         |         |         |         |         |          |
|----------------|---------|---------|---------|---------|---------|----------|
| GAIF01030012.1 | 3895.42 | 4573.13 | 9061.9  | 2388.85 | 1591.28 | 10373.48 |
| GAIF01030013.1 | 2.9     | 4.7     | 6.09    | 898.83  | 807.35  | 460.61   |
| GAIF01030014.1 | 0.17    | 0       | 0       | 0       | 0       | 0        |
| GAIF01030015.1 | 0.31    | 0       | 0       | 0.83    | 0.25    | 0        |
| GAIF01030016.1 | 0.03    | 0.11    | 0       | 0       | 0       | 0.08     |
| GAIF01030017.1 | 0       | 0       | 0.34    | 0       | 0       | 0        |
| GAIF01030019.1 | 39.06   | 10.97   | 14.55   | 23.11   | 15.29   | 20.57    |
| GAIF01030021.1 | 0.2     | 0       | 0.11    | 0       | 0.59    | 0        |
| GAIF01030022.1 | 0.38    | 0.04    | 0       | 1.61    | 4.66    | 0.04     |
| GAIF01030023.1 | 0       | 0       | 0.13    | 0       | 0       | 0        |
| GAIF01030024.1 | 4.32    | 6.93    | 8.05    | 1.36    | 0.35    | 0.24     |
| GAIF01030025.1 | 2.78    | 5.95    | 3.14    | 2.15    | 2.53    | 1.21     |
| GAIF01030026.1 | 0       | 0       | 0       | 0       | 0.12    | 0        |
| GAIF01030028.1 | 0       | 0       | 0       | 0.12    | 0.19    | 0.06     |
| GAIF01030030.1 | 0.1     | 0       | 0       | 0.57    | 0.72    | 0        |
| GAIF01030031.1 | 2226.12 | 6268.11 | 7947.57 | 2416.26 | 1550.56 | 973.79   |
| GAIF01030034.1 | 53.02   | 23.93   | 16.2    | 82.31   | 32.56   | 6.26     |
| GAIF01030035.1 | 7.74    | 8.42    | 11.43   | 25.03   | 15.83   | 4.05     |
| GAIF01030036.1 | 0       | 0       | 0       | 0.45    | 1.16    | 0        |
| GAIF01030037.1 | 63.9    | 38.11   | 122.61  | 25.86   | 6.89    | 18.95    |
| GAIF01030039.1 | 7.18    | 2.5     | 0.42    | 28.42   | 57.51   | 1.27     |
| GAIF01030040.1 | 1.43    | 0.35    | 0.2     | 5.57    | 22.7    | 0.15     |
| GAIF01030041.1 | 18.23   | 19.96   | 32.29   | 54.45   | 47.8    | 27.59    |
| GAIF01030043.1 | 0       | 0.05    | 0       | 0.05    | 0.05    | 0        |
| GAIF01030044.1 | 73.74   | 86.98   | 54.82   | 199.34  | 189.36  | 28.21    |
| GAIF01030045.1 | 0.05    | 0       | 0       | 0.12    | 0.12    | 0        |
| GAIF01030046.1 | 28.13   | 17.37   | 17.01   | 42.56   | 68.15   | 14.38    |
| GAIF01030048.1 | 53.03   | 73.97   | 86.94   | 100.75  | 64.42   | 35.54    |
| GAIF01030049.1 | 5.08    | 4.89    | 5.08    | 15.15   | 30.13   | 2.03     |
| GAIF01030050.1 | 0.31    | 0.37    | 0.22    | 0.72    | 1.5     | 0.11     |
| GAIF01030051.1 | 144.28  | 238.71  | 287.27  | 138.91  | 109.02  | 64.17    |
| GAIF01030052.1 | 0       | 0.43    | 0.97    | 0       | 0       | 0.38     |
| GAIF01030053.1 | 0.71    | 0.92    | 0.62    | 4.49    | 3.87    | 0.01     |
| GAIF01030057.1 | 0.24    | 0.4     | 0       | 0.43    | 0       | 0.4      |
| GAIF01030058.1 | 0.42    | 0.75    | 0       | 1.61    | 6.67    | 0        |
| GAIF01030060.1 | 0.18    | 0.4     | 0.2     | 0.21    | 6.16    | 0        |
| GAIF01030061.1 | 0       | 0       | 0       | 1.59    | 4.17    | 0.17     |
| GAIF01030062.1 | 20.8    | 32.81   | 31.11   | 48.51   | 48.87   | 13.46    |
| GAIF01030063.1 | 0.25    | 0.68    | 0       | 0.29    | 0       | 0        |
| GAIF01030064.1 | 0       | 0       | 0       | 0       | 0.06    | 0        |
| GAIF01030065.1 | 12.16   | 3.58    | 1.9     | 23.44   | 25.94   | 10.09    |
| GAIF01030066.1 | 1.19    | 0.1     | 0.08    | 1.53    | 2.02    | 0.91     |
| GAIF01030070.1 | 0.1     | 0.06    | 0.09    | 0.06    | 0.12    | 0.05     |
| GAIF01030071.1 | 0       | 0.47    | 1.1     | 0.06    | 0.55    | 0.34     |

|                |        |        |        |        |        |         |
|----------------|--------|--------|--------|--------|--------|---------|
| GAIF01030072.1 | 2.52   | 4.57   | 0.23   | 7.08   | 13.9   | 0.23    |
| GAIF01030073.1 | 0      | 0      | 0      | 0      | 0.12   | 0       |
| GAIF01030074.1 | 0      | 0      | 0      | 0.24   | 1.72   | 0       |
| GAIF01030075.1 | 0.55   | 0.17   | 0.23   | 2.07   | 7.82   | 0.16    |
| GAIF01030077.1 | 0      | 0      | 0      | 0      | 0.2    | 0       |
| GAIF01030078.1 | 0.05   | 0      | 0      | 0      | 0.23   | 0       |
| GAIF01030079.1 | 3.28   | 3.56   | 3.6    | 3.8    | 23.65  | 0       |
| GAIF01030081.1 | 2.46   | 2.71   | 1.89   | 12     | 2.57   | 2.05    |
| GAIF01030082.1 | 601.84 | 252.11 | 108.28 | 438.02 | 403.15 | 85.97   |
| GAIF01030083.1 | 78.34  | 47.08  | 84.22  | 77.69  | 10.89  | 31.91   |
| GAIF01030085.1 | 0      | 0      | 0.09   | 0      | 0.14   | 0.04    |
| GAIF01030086.1 | 0.7    | 0.57   | 0.57   | 0.2    | 0      | 0       |
| GAIF01030089.1 | 964.42 | 255.56 | 293.01 | 497.88 | 855.19 | 3027.87 |
| GAIF01030090.1 | 2.06   | 0.3    | 0.45   | 8.38   | 23.53  | 1.34    |
| GAIF01030091.1 | 0.09   | 0      | 0      | 0      | 0      | 0       |
| GAIF01030092.1 | 0      | 0.07   | 0      | 0.11   | 0      | 0       |
| GAIF01030093.1 | 0      | 0      | 0      | 0.06   | 0.06   | 0       |
| GAIF01030094.1 | 1.35   | 2.84   | 1.39   | 1.17   | 0.81   | 0.65    |
| GAIF01030096.1 | 57.3   | 83.42  | 92.5   | 122.27 | 97.53  | 93.53   |
| GAIF01030097.1 | 0      | 0      | 0      | 0.14   | 0.07   | 0       |
| GAIF01030098.1 | 19.3   | 27.02  | 33.47  | 44.67  | 26.81  | 10.23   |
| GAIF01030099.1 | 140.3  | 144.73 | 154.03 | 243.16 | 292.56 | 453.64  |
| GAIF01030100.1 | 0.34   | 0      | 0      | 0.74   | 5.45   | 0.53    |
| GAIF01030102.1 | 0      | 2.7    | 4.71   | 10.93  | 5.01   | 8.1     |
| GAIF01030103.1 | 15.45  | 0.14   | 2.12   | 15.07  | 1.48   | 35.66   |
| GAIF01030105.1 | 0      | 0      | 0      | 0      | 0.1    | 0       |
| GAIF01030106.1 | 17.46  | 9.63   | 15.66  | 39.96  | 28.99  | 40.66   |
| GAIF01030107.1 | 7.95   | 17.96  | 4.34   | 33.29  | 35.88  | 13.09   |
| GAIF01030111.1 | 4.49   | 0      | 0.21   | 2.71   | 0.11   | 0.93    |
| GAIF01030113.1 | 0.03   | 0      | 0      | 0      | 0      | 0       |
| GAIF01030114.1 | 5.6    | 8.22   | 2.8    | 10.48  | 18.92  | 3.84    |
| GAIF01030116.1 | 0      | 0      | 0      | 0      | 0.24   | 0       |
| GAIF01030119.1 | 1.45   | 0.87   | 0.72   | 1.35   | 1.22   | 0.8     |
| GAIF01030120.1 | 0      | 0.11   | 0.12   | 0      | 0      | 0       |
| GAIF01030122.1 | 0      | 0.16   | 0      | 0      | 0      | 0       |
| GAIF01030123.1 | 0.62   | 1.17   | 1.48   | 1.07   | 0.06   | 0.7     |
| GAIF01030125.1 | 1.22   | 0.03   | 0      | 0.34   | 2.39   | 0       |
| GAIF01030127.1 | 16.48  | 24.89  | 10.73  | 7.66   | 11.12  | 3.48    |
| GAIF01030128.1 | 41.68  | 54.49  | 62.1   | 43.54  | 20.89  | 16.3    |
| GAIF01030129.1 | 0.32   | 0.09   | 0.09   | 0.66   | 0.58   | 0.04    |
| GAIF01030130.1 | 3.41   | 1.93   | 0.64   | 15.95  | 17.89  | 0.7     |
| GAIF01030133.1 | 2.93   | 0.38   | 0      | 1.36   | 10.57  | 13.69   |
| GAIF01030134.1 | 0      | 0      | 0      | 0      | 1.03   | 0       |
| GAIF01030135.1 | 0.4    | 0.07   | 0.04   | 4.52   | 17.3   | 0.07    |

|                |        |        |        |        |        |       |
|----------------|--------|--------|--------|--------|--------|-------|
| GAIF01030136.1 | 0      | 0      | 0      | 0.14   | 0.14   | 0     |
| GAIF01030139.1 | 24.17  | 14.15  | 12.21  | 51.19  | 55.07  | 16.16 |
| GAIF01030140.1 | 0.05   | 0      | 0      | 0.05   | 0.22   | 0     |
| GAIF01030141.1 | 0.2    | 0.17   | 0.12   | 0.58   | 0.75   | 0.05  |
| GAIF01030143.1 | 0      | 0      | 0.06   | 0.18   | 0.7    | 0     |
| GAIF01030145.1 | 34.25  | 87.04  | 56.35  | 35.7   | 38.3   | 7.11  |
| GAIF01030148.1 | 0      | 0      | 0      | 0      | 0      | 0.02  |
| GAIF01030150.1 | 0.92   | 0.14   | 0      | 0.46   | 1.9    | 1.16  |
| GAIF01030152.1 | 0.08   | 0      | 0.08   | 0.09   | 1.02   | 0     |
| GAIF01030153.1 | 54.43  | 14.43  | 43.77  | 60.27  | 33.9   | 20.12 |
| GAIF01030154.1 | 358.24 | 400.43 | 410.64 | 0.17   | 0.53   | 0.41  |
| GAIF01030155.1 | 28.97  | 15.05  | 6.82   | 4.28   | 3.44   | 0.5   |
| GAIF01030157.1 | 0      | 0      | 0      | 0.25   | 0      | 0     |
| GAIF01030158.1 | 0      | 0      | 0      | 0      | 0      | 0.1   |
| GAIF01030159.1 | 0      | 4.11   | 3.58   | 3.14   | 5.97   | 1.09  |
| GAIF01030164.1 | 0.2    | 0.26   | 0.35   | 0.1    | 0.45   | 0     |
| GAIF01030165.1 | 1.08   | 0.64   | 0      | 2.42   | 6.22   | 1.66  |
| GAIF01030167.1 | 0      | 0      | 0.03   | 0      | 0      | 0     |
| GAIF01030168.1 | 0.17   | 0      | 0      | 0      | 0      | 0     |
| GAIF01030170.1 | 2.72   | 3.26   | 3.61   | 3.85   | 2.75   | 0.26  |
| GAIF01030171.1 | 0.14   | 0      | 0.07   | 0.16   | 0      | 0.07  |
| GAIF01030172.1 | 0      | 0.07   | 0      | 0.07   | 0      | 0     |
| GAIF01030173.1 | 95.22  | 26.46  | 72.98  | 147.47 | 95.94  | 15.96 |
| GAIF01030174.1 | 2.76   | 7.93   | 3.26   | 4.11   | 0      | 1.51  |
| GAIF01030177.1 | 20.42  | 23.63  | 35.25  | 70.33  | 32.08  | 20.51 |
| GAIF01030179.1 | 0      | 0      | 0      | 0      | 0.33   | 0     |
| GAIF01030180.1 | 0.1    | 0.34   | 0.23   | 0.12   | 0      | 0     |
| GAIF01030181.1 | 12.6   | 0.22   | 5.42   | 26.01  | 7.85   | 40    |
| GAIF01030182.1 | 10.16  | 2.59   | 1.15   | 13.66  | 15.7   | 0.9   |
| GAIF01030183.1 | 0.11   | 0      | 0      | 0.63   | 4.44   | 0.12  |
| GAIF01030184.1 | 1.63   | 1.61   | 0      | 4.73   | 9.88   | 0.33  |
| GAIF01030186.1 | 198.88 | 19.69  | 37.37  | 377.26 | 152.64 | 58.91 |
| GAIF01030188.1 | 0      | 0      | 0      | 0      | 1.33   | 0     |
| GAIF01030189.1 | 2.47   | 3.78   | 1.24   | 10.34  | 16.14  | 1     |
| GAIF01030190.1 | 17.07  | 25.34  | 13.57  | 40.31  | 44.05  | 5.57  |
| GAIF01030191.1 | 0.51   | 0.14   | 0.14   | 1.11   | 1.61   | 0.56  |
| GAIF01030192.1 | 3.79   | 5.2    | 4.32   | 5.39   | 3.27   | 0.98  |
| GAIF01030193.1 | 0      | 0.17   | 0      | 0      | 0      | 0     |
| GAIF01030194.1 | 0.63   | 0      | 0      | 2.45   | 25.48  | 1.86  |
| GAIF01030196.1 | 14.37  | 20.62  | 17.78  | 59.67  | 72.97  | 7.94  |
| GAIF01030197.1 | 0      | 0      | 0      | 0      | 0.1    | 0     |
| GAIF01030198.1 | 0      | 0      | 0      | 0.1    | 0.7    | 0     |
| GAIF01030201.1 | 0.5    | 0.27   | 0.27   | 0.58   | 0.45   | 0.14  |
| GAIF01030202.1 | 0.04   | 0      | 0      | 0.04   | 0.15   | 0     |

|                |        |         |         |        |        |       |
|----------------|--------|---------|---------|--------|--------|-------|
| GAIF01030203.1 | 0.21   | 0.54    | 0       | 0.14   | 1.1    | 0.3   |
| GAIF01030204.1 | 21.99  | 29.93   | 14.57   | 49.76  | 58.54  | 15.75 |
| GAIF01030205.1 | 1.29   | 0.16    | 1.73    | 0.83   | 0.69   | 4.43  |
| GAIF01030207.1 | 0.53   | 0.29    | 0.19    | 3.88   | 27.54  | 0.39  |
| GAIF01030208.1 | 1389.8 | 3072.53 | 2860.11 | 604.15 | 777.04 | 818.1 |
| GAIF01030209.1 | 629.75 | 542.5   | 275.48  | 507.4  | 1479   | 105.2 |
| GAIF01030210.1 | 0.89   | 1.66    | 0.91    | 3.61   | 6.04   | 0.63  |
| GAIF01030213.1 | 0.76   | 4.89    | 5.85    | 198.8  | 66.86  | 79.28 |
| GAIF01030214.1 | 27.67  | 15.83   | 25.55   | 18.36  | 2.78   | 18.64 |
| GAIF01030215.1 | 0      | 0       | 0.08    | 1.02   | 3.96   | 0.16  |
| GAIF01030217.1 | 0      | 0       | 0       | 0.01   | 0      | 0     |
| GAIF01030218.1 | 6.25   | 3.68    | 4.38    | 0.61   | 0.55   | 1.58  |
| GAIF01030219.1 | 18.93  | 11.63   | 4.75    | 22.77  | 15.74  | 2.52  |
| GAIF01030221.1 | 0.16   | 0.17    | 0       | 0      | 1.33   | 0     |
| GAIF01030222.1 | 58.82  | 43.02   | 38.75   | 57.92  | 58.73  | 32.22 |
| GAIF01030223.1 | 0      | 0.27    | 0       | 0.57   | 0.29   | 0     |
| GAIF01030224.1 | 0.1    | 0       | 0.23    | 2.06   | 8.39   | 0.34  |
| GAIF01030225.1 | 3.49   | 4.03    | 4.14    | 16.55  | 21.09  | 2.54  |
| GAIF01030227.1 | 0.08   | 0.04    | 0.13    | 0      | 5.64   | 0.09  |
| GAIF01030228.1 | 3.78   | 6.56    | 7.53    | 5.35   | 4.84   | 1.69  |
| GAIF01030229.1 | 0.09   | 0.14    | 0       | 0.1    | 0.34   | 0     |
| GAIF01030232.1 | 2.62   | 11.41   | 0       | 9.13   | 12.61  | 0     |
| GAIF01030233.1 | 1.04   | 0.63    | 0.51    | 0.4    | 0.19   | 0.13  |
| GAIF01030235.1 | 0      | 0.12    | 0.12    | 0      | 0      | 0     |
| GAIF01030236.1 | 81.19  | 55.67   | 54.78   | 69     | 24.1   | 19.92 |
| GAIF01030238.1 | 1.93   | 0.88    | 1.22    | 0.35   | 0.24   | 0.11  |
| GAIF01030239.1 | 0      | 0.2     | 0       | 1.36   | 5.57   | 0.12  |
| GAIF01030240.1 | 11.46  | 10.36   | 5.41    | 15.53  | 19.47  | 21.86 |
| GAIF01030241.1 | 11.05  | 17.3    | 11.53   | 33.85  | 22.73  | 2.57  |
| GAIF01030242.1 | 0      | 0       | 0       | 0      | 0.17   | 0     |
| GAIF01030243.1 | 3.87   | 3.1     | 3.88    | 8.59   | 5.75   | 7.53  |
| GAIF01030244.1 | 0      | 0.22    | 0       | 0.72   | 5.45   | 0     |
| GAIF01030245.1 | 15.76  | 16.55   | 11.26   | 39.83  | 59.27  | 8.45  |
| GAIF01030246.1 | 0.37   | 0.24    | 0.16    | 2.81   | 6.62   | 0.24  |
| GAIF01030247.1 | 30.71  | 32.01   | 36.81   | 45.24  | 27.81  | 21.08 |
| GAIF01030248.1 | 171.78 | 61.23   | 21.87   | 190.07 | 135.79 | 14.76 |
| GAIF01030249.1 | 152.5  | 70.92   | 82.26   | 130.71 | 96.89  | 207.1 |
| GAIF01030250.1 | 126.26 | 173.03  | 266.42  | 77.67  | 49.07  | 28.6  |
| GAIF01030251.1 | 0      | 0       | 0.04    | 0      | 0      | 0     |
| GAIF01030252.1 | 4.51   | 4.74    | 3.95    | 2.29   | 2.07   | 0.56  |
| GAIF01030254.1 | 0      | 0.05    | 0       | 0      | 0      | 0.05  |
| GAIF01030256.1 | 0.3    | 0.17    | 0       | 1.5    | 3.57   | 0.08  |
| GAIF01030257.1 | 10.1   | 4.42    | 6.78    | 6.45   | 3.15   | 5.45  |
| GAIF01030258.1 | 0      | 0       | 0       | 0      | 0.06   | 0     |

|                |        |        |        |        |        |        |
|----------------|--------|--------|--------|--------|--------|--------|
| GAIF01030259.1 | 17.49  | 18.5   | 27.75  | 40.53  | 15.99  | 13.97  |
| GAIF01030260.1 | 6.4    | 7.32   | 4.48   | 6.01   | 2.77   | 0.97   |
| GAIF01030261.1 | 0.21   | 0.23   | 0      | 0.48   | 0.75   | 0.23   |
| GAIF01030262.1 | 3.76   | 9.93   | 3.15   | 16.25  | 28.5   | 0.17   |
| GAIF01030264.1 | 0.08   | 0.09   | 0      | 0.64   | 1.04   | 0.26   |
| GAIF01030265.1 | 0.38   | 0      | 0      | 0.87   | 0.3    | 0      |
| GAIF01030266.1 | 0      | 0      | 0      | 0      | 0.31   | 0      |
| GAIF01030267.1 | 0.9    | 0.63   | 0.32   | 10.87  | 22.45  | 0.07   |
| GAIF01030270.1 | 0.75   | 0.16   | 0      | 2.71   | 12.42  | 0.08   |
| GAIF01030271.1 | 0      | 0      | 0      | 0.04   | 0      | 0      |
| GAIF01030273.1 | 1.68   | 1.51   | 1.04   | 3.49   | 3.53   | 0.04   |
| GAIF01030274.1 | 10.22  | 16.34  | 10.22  | 11.95  | 10.64  | 1.43   |
| GAIF01030277.1 | 0.63   | 0.66   | 0.45   | 2.98   | 2.72   | 0.43   |
| GAIF01030278.1 | 9.5    | 9.2    | 4.74   | 2.56   | 1.92   | 0.43   |
| GAIF01030280.1 | 0      | 0      | 0      | 0.01   | 0      | 0      |
| GAIF01030281.1 | 0      | 0      | 0      | 0.04   | 0.17   | 0      |
| GAIF01030282.1 | 18.81  | 13.7   | 11.71  | 10.58  | 6.06   | 4.27   |
| GAIF01030283.1 | 1.7    | 0.67   | 0.51   | 8      | 16.02  | 1.53   |
| GAIF01030284.1 | 0      | 0      | 0      | 0.17   | 0      | 0      |
| GAIF01030285.1 | 0      | 0      | 0      | 0      | 0.22   | 0      |
| GAIF01030287.1 | 35.25  | 26.29  | 27.67  | 44.9   | 39.89  | 17.06  |
| GAIF01030291.1 | 0      | 0      | 0      | 0.25   | 0.22   | 0      |
| GAIF01030292.1 | 3.38   | 0.91   | 0      | 2.34   | 3.37   | 0.54   |
| GAIF01030293.1 | 0.44   | 0      | 0.09   | 0.37   | 2.08   | 0      |
| GAIF01030295.1 | 0      | 0      | 0      | 0      | 0.44   | 0      |
| GAIF01030297.1 | 15.76  | 20.26  | 5.92   | 10.62  | 10.06  | 1.41   |
| GAIF01030299.1 | 2.25   | 0.13   | 0.13   | 5.63   | 18.96  | 0.3    |
| GAIF01030301.1 | 135.06 | 249.31 | 266.8  | 118.71 | 103.51 | 41.87  |
| GAIF01030302.1 | 0.72   | 0.87   | 0.09   | 1.45   | 8.94   | 0.27   |
| GAIF01030303.1 | 0.53   | 0      | 0.46   | 1.6    | 0      | 2.36   |
| GAIF01030304.1 | 0      | 0.33   | 0      | 0      | 0      | 0      |
| GAIF01030305.1 | 0      | 0      | 0      | 15.42  | 0      | 2.55   |
| GAIF01030306.1 | 3.27   | 3.77   | 0.86   | 6.14   | 3.38   | 0.22   |
| GAIF01030307.1 | 5.15   | 3.21   | 0.7    | 7.82   | 13.04  | 7.56   |
| GAIF01030308.1 | 241.81 | 164.02 | 149.99 | 50.97  | 139.01 | 181.83 |
| GAIF01030309.1 | 0      | 0.28   | 0      | 0      | 0      | 0      |
| GAIF01030310.1 | 0      | 0      | 0      | 0      | 0.03   | 0      |
| GAIF01030312.1 | 4.4    | 12.09  | 4.33   | 4.14   | 6.84   | 1.72   |
| GAIF01030313.1 | 13.94  | 7.73   | 5.82   | 0.99   | 1.16   | 0.86   |
| GAIF01030314.1 | 9.29   | 1.42   | 0      | 20.03  | 53.65  | 19.57  |
| GAIF01030316.1 | 0.9    | 1.49   | 0.76   | 2.08   | 1.4    | 0      |
| GAIF01030317.1 | 0.49   | 0      | 0      | 0.59   | 1.8    | 0      |
| GAIF01030319.1 | 2.17   | 0.51   | 0      | 2.4    | 3.6    | 0.46   |
| GAIF01030320.1 | 0      | 0.07   | 0.26   | 0.41   | 0.36   | 0      |

|                |       |        |        |        |        |       |
|----------------|-------|--------|--------|--------|--------|-------|
| GAIF01030321.1 | 2.92  | 0.67   | 0.72   | 0.4    | 0.13   | 0.19  |
| GAIF01030322.1 | 0.08  | 0      | 0      | 0.49   | 1.43   | 1.68  |
| GAIF01030325.1 | 0.06  | 0.26   | 0.53   | 3.61   | 10.22  | 0.13  |
| GAIF01030327.1 | 0.14  | 0      | 0      | 0.36   | 1.73   | 0     |
| GAIF01030328.1 | 0     | 0      | 0      | 0      | 0      | 0.1   |
| GAIF01030329.1 | 0     | 0.1    | 0.09   | 0.09   | 0.1    | 0.09  |
| GAIF01030330.1 | 0.11  | 0.12   | 0      | 0      | 0      | 0     |
| GAIF01030331.1 | 1.97  | 1.55   | 0.51   | 0.1    | 0.05   | 0.69  |
| GAIF01030333.1 | 0     | 0      | 0      | 0      | 0.2    | 0     |
| GAIF01030334.1 | 34.88 | 28.37  | 38.37  | 55.81  | 1.36   | 31.98 |
| GAIF01030335.1 | 0.42  | 0.77   | 0.62   | 1.49   | 3.07   | 0.16  |
| GAIF01030337.1 | 0.8   | 0.09   | 0.31   | 0.24   | 0      | 0.13  |
| GAIF01030338.1 | 0     | 0      | 0.09   | 0.09   | 0      | 0     |
| GAIF01030339.1 | 1.13  | 0      | 0      | 0.97   | 3.54   | 0     |
| GAIF01030341.1 | 4.38  | 2.42   | 4.75   | 5.37   | 3.68   | 11.12 |
| GAIF01030342.1 | 4.61  | 4.55   | 1.84   | 2.43   | 2.27   | 0.92  |
| GAIF01030343.1 | 9.43  | 11.67  | 12.69  | 10.17  | 8.16   | 2.38  |
| GAIF01030344.1 | 132.1 | 154.61 | 225.48 | 106.27 | 76.86  | 77.22 |
| GAIF01030345.1 | 0     | 0      | 0      | 0      | 0.13   | 0     |
| GAIF01030346.1 | 4.41  | 9.09   | 10.74  | 6.22   | 3.04   | 8.87  |
| GAIF01030347.1 | 0     | 2.61   | 1.82   | 0      | 0.07   | 0     |
| GAIF01030348.1 | 0     | 0.04   | 0      | 0      | 0.14   | 0     |
| GAIF01030350.1 | 14.05 | 25.31  | 28.87  | 10.12  | 31.55  | 92    |
| GAIF01030351.1 | 29.35 | 25.01  | 12.95  | 76.72  | 102.9  | 10.99 |
| GAIF01030353.1 | 2.82  | 1.88   | 0.05   | 0.8    | 9.98   | 0.65  |
| GAIF01030355.1 | 8.74  | 9.5    | 0      | 0      | 0      | 9.58  |
| GAIF01030356.1 | 0.61  | 0.22   | 0.89   | 0      | 0      | 0     |
| GAIF01030357.1 | 3.41  | 2.92   | 3.27   | 5.89   | 28.51  | 16.61 |
| GAIF01030359.1 | 0.19  | 0.05   | 0.06   | 0.35   | 0.73   | 0.7   |
| GAIF01030363.1 | 4.69  | 0.37   | 0.19   | 2.37   | 4.33   | 4.16  |
| GAIF01030364.1 | 0     | 0.12   | 0.06   | 0.06   | 0.13   | 0     |
| GAIF01030365.1 | 49.91 | 73.37  | 79.82  | 85.53  | 52.83  | 22.79 |
| GAIF01030366.1 | 12.31 | 11.25  | 7.18   | 37.04  | 25.54  | 3.84  |
| GAIF01030368.1 | 0     | 0      | 0      | 0.13   | 0.27   | 0     |
| GAIF01030369.1 | 1.64  | 3.98   | 0.74   | 9.61   | 12.63  | 0.11  |
| GAIF01030370.1 | 0.31  | 0      | 0.73   | 3.34   | 4.18   | 12.84 |
| GAIF01030371.1 | 77.01 | 34.24  | 0.67   | 38.77  | 130.69 | 7.98  |
| GAIF01030373.1 | 0.61  | 0.57   | 0.72   | 2.45   | 6.68   | 0.2   |
| GAIF01030376.1 | 12.61 | 11.76  | 19.69  | 18.82  | 11.99  | 9.28  |
| GAIF01030379.1 | 0     | 0      | 0      | 0.04   | 0.16   | 0.1   |
| GAIF01030381.1 | 0     | 0      | 0.07   | 0      | 0      | 0     |
| GAIF01030383.1 | 22.89 | 28.75  | 21.3   | 56.52  | 44.03  | 14.19 |
| GAIF01030385.1 | 0     | 0.11   | 0      | 0.34   | 0.65   | 0.09  |
| GAIF01030386.1 | 0     | 0      | 0      | 2.15   | 7.02   | 58.93 |

|                |        |        |        |        |        |        |
|----------------|--------|--------|--------|--------|--------|--------|
| GAIF01030387.1 | 0      | 0      | 0      | 4.06   | 1.87   | 0      |
| GAIF01030388.1 | 0      | 0.05   | 0.09   | 0      | 0      | 0      |
| GAIF01030389.1 | 0.23   | 0      | 0      | 0.22   | 0.45   | 0      |
| GAIF01030393.1 | 0.29   | 0.1    | 0      | 1.23   | 6.61   | 0      |
| GAIF01030394.1 | 0.68   | 0.41   | 0      | 2.61   | 22.44  | 0.18   |
| GAIF01030395.1 | 46.92  | 39.53  | 29.68  | 12.13  | 9.88   | 10.87  |
| GAIF01030396.1 | 0      | 3.02   | 0.95   | 0      | 0.07   | 0.14   |
| GAIF01030397.1 | 0.32   | 0.09   | 0.09   | 0.65   | 3.19   | 0.27   |
| GAIF01030398.1 | 0      | 0      | 0      | 0.11   | 0.01   | 0      |
| GAIF01030399.1 | 0      | 0      | 0      | 0.04   | 0.05   | 0      |
| GAIF01030400.1 | 1.74   | 0.91   | 2.59   | 8.21   | 6.75   | 0.66   |
| GAIF01030401.1 | 0.02   | 0.02   | 0      | 0.02   | 0      | 0.02   |
| GAIF01030402.1 | 0.01   | 0.01   | 0.02   | 0      | 0      | 0      |
| GAIF01030403.1 | 19.76  | 43.16  | 10.78  | 31.98  | 42.98  | 2.64   |
| GAIF01030404.1 | 14.22  | 15.69  | 13.98  | 30.62  | 19.97  | 5.03   |
| GAIF01030405.1 | 0      | 0      | 0      | 0      | 0.33   | 0      |
| GAIF01030406.1 | 7.39   | 12.85  | 5.66   | 16.84  | 12.57  | 2.47   |
| GAIF01030408.1 | 258.02 | 266.11 | 222.32 | 177.3  | 124.74 | 137.75 |
| GAIF01030409.1 | 0      | 0      | 0      | 0      | 1.69   | 1.38   |
| GAIF01030411.1 | 0.11   | 0.06   | 0      | 0      | 0      | 0      |
| GAIF01030412.1 | 0      | 0      | 0      | 0      | 0.09   | 0      |
| GAIF01030413.1 | 4.18   | 1.92   | 1.53   | 0.32   | 0.22   | 0      |
| GAIF01030414.1 | 7.9    | 17.47  | 8.78   | 6.49   | 7.91   | 3.05   |
| GAIF01030415.1 | 0      | 0      | 0      | 0      | 0.14   | 0      |
| GAIF01030416.1 | 4.25   | 0.56   | 1.84   | 7.17   | 11.53  | 29.97  |
| GAIF01030417.1 | 9.9    | 9.68   | 13.04  | 32.16  | 20.23  | 15.57  |
| GAIF01030418.1 | 0      | 0      | 0      | 0      | 0.54   | 0      |
| GAIF01030419.1 | 9.15   | 4.11   | 0      | 6.77   | 6.98   | 0.57   |
| GAIF01030421.1 | 4.85   | 0.66   | 0.24   | 10.97  | 39.58  | 1.52   |
| GAIF01030422.1 | 0      | 0      | 0      | 0.48   | 1.16   | 0      |
| GAIF01030424.1 | 40.98  | 29.41  | 32.32  | 43.9   | 48.86  | 23.03  |
| GAIF01030425.1 | 0      | 0.1    | 0      | 0      | 0.74   | 0      |
| GAIF01030427.1 | 0.33   | 0.19   | 0.17   | 0.76   | 5.97   | 0.7    |
| GAIF01030429.1 | 0.91   | 0.74   | 0.5    | 3.16   | 5.04   | 0.37   |
| GAIF01030430.1 | 74.84  | 95.94  | 182.41 | 107.09 | 69.94  | 70.23  |
| GAIF01030431.1 | 0      | 0      | 0      | 0      | 0      | 0.2    |
| GAIF01030432.1 | 0.1    | 0.03   | 0      | 0.19   | 0.88   | 0      |
| GAIF01030433.1 | 0.13   | 0.06   | 0.06   | 0.86   | 3.36   | 0      |
| GAIF01030434.1 | 7.25   | 2.91   | 5.57   | 31.85  | 65.24  | 7.35   |
| GAIF01030435.1 | 98.64  | 69.98  | 39.23  | 32.68  | 35.22  | 6.33   |
| GAIF01030436.1 | 0.38   | 0.2    | 0.52   | 0.22   | 0.34   | 0.1    |
| GAIF01030437.1 | 1.98   | 0.87   | 0.5    | 0.13   | 0.2    | 0.14   |
| GAIF01030438.1 | 0.31   | 1.23   | 0.56   | 0.95   | 1.81   | 0.28   |
| GAIF01030439.1 | 64.15  | 64.44  | 22.59  | 0.03   | 0.64   | 0      |



|                |        |        |        |        |        |        |
|----------------|--------|--------|--------|--------|--------|--------|
| GAIF01030441.1 | 1.06   | 0.48   | 0.23   | 1.35   | 1.04   | 0      |
| GAIF01030442.1 | 0      | 0      | 0      | 0.03   | 0.16   | 0      |
| GAIF01030443.1 | 0.2    | 0      | 0      | 2.4    | 0      | 1.43   |
| GAIF01030444.1 | 0.59   | 0.52   | 8.67   | 7.39   | 1.61   | 3.71   |
| GAIF01030446.1 | 0      | 0.13   | 0      | 0.13   | 0.36   | 0      |
| GAIF01030447.1 | 0.04   | 0      | 0.02   | 0.11   | 0.25   | 0.02   |
| GAIF01030448.1 | 0      | 0.38   | 0.43   | 0      | 0.05   | 0.29   |
| GAIF01030449.1 | 0      | 0      | 0      | 0.12   | 0      | 0      |
| GAIF01030450.1 | 180.32 | 198.24 | 467.31 | 155.27 | 121.09 | 401.87 |
| GAIF01030451.1 | 9.58   | 5.57   | 6.27   | 37.85  | 82.58  | 26.7   |
| GAIF01030452.1 | 0.14   | 0.1    | 0      | 1.78   | 3.58   | 0.31   |
| GAIF01030453.1 | 0.17   | 0.1    | 0      | 0.1    | 0      | 0      |
| GAIF01030455.1 | 0.36   | 0      | 0      | 0.19   | 0      | 50.05  |
| GAIF01030456.1 | 13.07  | 16.58  | 8.31   | 60.67  | 36.12  | 6.19   |
| GAIF01030457.1 | 23.19  | 18.48  | 9.27   | 38.15  | 41.69  | 7.17   |
| GAIF01030458.1 | 0      | 0      | 0      | 0.03   | 0.03   | 0      |
| GAIF01030459.1 | 254.16 | 339.39 | 167.66 | 224.02 | 185.69 | 31.29  |
| GAIF01030460.1 | 0      | 4.52   | 0      | 0      | 0.13   | 0      |
| GAIF01030462.1 | 2.95   | 1.7    | 2.1    | 7.11   | 5.69   | 2.65   |
| GAIF01030463.1 | 13.3   | 12.43  | 15.64  | 24.08  | 35.66  | 109.03 |
| GAIF01030464.1 | 0.19   | 0.2    | 0.05   | 1.96   | 4.9    | 0.1    |
| GAIF01030465.1 | 7.52   | 4.27   | 8.31   | 14.06  | 20.1   | 100.03 |
| GAIF01030467.1 | 0.05   | 0.05   | 0      | 0.47   | 2.88   | 0.05   |
| GAIF01030469.1 | 0      | 0      | 0      | 0.02   | 0      | 0      |
| GAIF01030470.1 | 3.48   | 1.08   | 0      | 4.43   | 0.71   | 0      |
| GAIF01030471.1 | 0.07   | 0      | 0      | 0.12   | 0.38   | 0      |
| GAIF01030472.1 | 0      | 0.14   | 0      | 0.29   | 0.82   | 0.21   |
| GAIF01030473.1 | 1.33   | 0.33   | 1.8    | 1.23   | 0.94   | 1.28   |
| GAIF01030474.1 | 5.33   | 5.77   | 8.09   | 2.59   | 5.62   | 5.74   |
| GAIF01030475.1 | 0      | 0      | 0      | 0      | 0.08   | 0      |
| GAIF01030477.1 | 1.4    | 1.87   | 0      | 0      | 0      | 0      |
| GAIF01030478.1 | 0      | 0.13   | 0      | 0      | 0.95   | 0      |
| GAIF01030479.1 | 1.26   | 0.32   | 1.55   | 1.03   | 0.36   | 0      |
| GAIF01030480.1 | 0.04   | 0      | 0      | 0.05   | 0      | 0      |
| GAIF01030481.1 | 46.94  | 13.84  | 3.97   | 370.57 | 853.56 | 25.61  |
| GAIF01030482.1 | 0      | 0      | 0      | 0      | 0.12   | 0      |
| GAIF01030483.1 | 0.26   | 0      | 0.35   | 2.87   | 3.1    | 4.01   |
| GAIF01030485.1 | 0.52   | 0      | 0      | 0      | 0      | 0      |
| GAIF01030486.1 | 0.06   | 0      | 0.04   | 0      | 0.02   | 0      |
| GAIF01030487.1 | 0      | 1.86   | 1.03   | 0      | 0      | 0.38   |
| GAIF01030488.1 | 15.2   | 7.12   | 6.71   | 4.66   | 3.38   | 2.26   |
| GAIF01030489.1 | 129.13 | 144.46 | 264.81 | 126.01 | 94.35  | 142.49 |
| GAIF01030490.1 | 0.07   | 0      | 0      | 0.4    | 0.99   | 0      |
| GAIF01030491.1 | 19.12  | 7.86   | 4.71   | 25.11  | 33.45  | 18.69  |

|                |        |         |         |        |        |        |
|----------------|--------|---------|---------|--------|--------|--------|
| GAIF01030493.1 | 0      | 0       | 0       | 0.14   | 0.44   | 0      |
| GAIF01030494.1 | 0      | 12.58   | 0       | 31.6   | 0      | 16.11  |
| GAIF01030495.1 | 0.18   | 0       | 0       | 0.1    | 0      | 0      |
| GAIF01030496.1 | 0      | 0       | 0       | 0.45   | 2.4    | 0.22   |
| GAIF01030497.1 | 3.01   | 4.05    | 1.47    | 4.6    | 3.31   | 0.53   |
| GAIF01030500.1 | 224.22 | 86.25   | 170.21  | 202.74 | 204.77 | 493.24 |
| GAIF01030501.1 | 10.5   | 13.86   | 4.33    | 31.51  | 25.72  | 1.43   |
| GAIF01030502.1 | 0      | 0       | 0       | 0      | 0.04   | 0      |
| GAIF01030504.1 | 0      | 0       | 0       | 0      | 0.02   | 0      |
| GAIF01030505.1 | 0.08   | 0.04    | 0       | 0.8    | 3.81   | 0.13   |
| GAIF01030506.1 | 3.38   | 4.04    | 6.19    | 3.27   | 1.52   | 3.75   |
| GAIF01030507.1 | 0.43   | 0       | 0.75    | 0.59   | 0      | 0      |
| GAIF01030511.1 | 0      | 0       | 0       | 1.34   | 3.06   | 0.91   |
| GAIF01030513.1 | 0.06   | 0.16    | 0.16    | 0.43   | 0.78   | 0.05   |
| GAIF01030514.1 | 54.59  | 65.71   | 76.95   | 81.15  | 96.23  | 114.67 |
| GAIF01030515.1 | 12.73  | 14.74   | 14.31   | 29.62  | 22.03  | 4.83   |
| GAIF01030516.1 | 6.55   | 9.53    | 13.01   | 17.26  | 11.19  | 10.22  |
| GAIF01030519.1 | 2.99   | 0.13    | 0.22    | 11.37  | 45.34  | 3.78   |
| GAIF01030520.1 | 0.44   | 0.18    | 0       | 1.87   | 10.42  | 0.31   |
| GAIF01030521.1 | 0      | 0       | 0       | 0      | 0      | 0.42   |
| GAIF01030524.1 | 0      | 0.31    | 0       | 0.11   | 0.8    | 0      |
| GAIF01030525.1 | 12.77  | 2.07    | 0.52    | 1.22   | 1.95   | 0      |
| GAIF01030526.1 | 0      | 0       | 0       | 0      | 1.3    | 0      |
| GAIF01030527.1 | 29.94  | 30.22   | 36.81   | 35.93  | 21.92  | 8.1    |
| GAIF01030528.1 | 0      | 0.14    | 0.14    | 0.44   | 3.69   | 1.27   |
| GAIF01030530.1 | 0.39   | 0       | 0       | 0.09   | 0      | 0      |
| GAIF01030531.1 | 3.58   | 6.15    | 8.36    | 9.64   | 13.04  | 1.53   |
| GAIF01030532.1 | 0.83   | 0.48    | 0.47    | 1.68   | 2.17   | 1.05   |
| GAIF01030534.1 | 0.52   | 0.07    | 0.02    | 3.85   | 18.07  | 0.22   |
| GAIF01030538.1 | 0      | 0       | 0       | 0.15   | 4.86   | 0      |
| GAIF01030539.1 | 35.71  | 21.97   | 23.08   | 66.26  | 36.45  | 14.5   |
| GAIF01030540.1 | 7.2    | 12.29   | 5.93    | 1.28   | 2.65   | 0.22   |
| GAIF01030541.1 | 42.92  | 55.06   | 29.65   | 30.32  | 20.53  | 1.78   |
| GAIF01030542.1 | 0      | 0       | 0.11    | 0      | 0.25   | 0      |
| GAIF01030543.1 | 0.11   | 0       | 0       | 0.13   | 0.67   | 0      |
| GAIF01030544.1 | 0.36   | 0.71    | 0.15    | 2.22   | 2.75   | 0.2    |
| GAIF01030546.1 | 7.85   | 12.19   | 15.12   | 11.34  | 6.55   | 8.65   |
| GAIF01030547.1 | 2.05   | 0.28    | 1.16    | 3.38   | 0      | 0.78   |
| GAIF01030549.1 | 0      | 0       | 0.14    | 0      | 0      | 0      |
| GAIF01030551.1 | 720.35 | 1261.81 | 1283.78 | 94.3   | 73.92  | 88.29  |
| GAIF01030552.1 | 0.58   | 0.16    | 0.08    | 0.08   | 0.35   | 0      |
| GAIF01030553.1 | 0      | 0       | 0       | 0      | 0.22   | 0      |
| GAIF01030554.1 | 0.07   | 0       | 0       | 1.41   | 3.73   | 0.07   |
| GAIF01030555.1 | 19.39  | 6.18    | 3.18    | 23.74  | 12.8   | 11.09  |

|                |        |        |        |        |        |        |
|----------------|--------|--------|--------|--------|--------|--------|
| GAIF01030556.1 | 0.15   | 0      | 0      | 0.34   | 2.82   | 0.16   |
| GAIF01030558.1 | 0.37   | 1      | 0.34   | 0.07   | 0      | 0.07   |
| GAIF01030559.1 | 199.53 | 315.36 | 526.84 | 970.48 | 584.94 | 355.53 |
| GAIF01030561.1 | 0.13   | 0      | 0      | 0.45   | 1.67   | 0      |
| GAIF01030562.1 | 15.67  | 7.45   | 6.62   | 20.81  | 32.57  | 22.98  |
| GAIF01030565.1 | 0.93   | 1.01   | 0.93   | 4.96   | 4.37   | 0.33   |
| GAIF01030567.1 | 67.36  | 77.44  | 29.15  | 236.48 | 158.95 | 9.45   |
| GAIF01030568.1 | 23.89  | 29.84  | 28.95  | 80.7   | 55.03  | 26.16  |
| GAIF01030569.1 | 0      | 0.25   | 0.26   | 0.27   | 0.28   | 0.13   |
| GAIF01030570.1 | 0      | 0      | 0      | 0      | 0      | 21.42  |
| GAIF01030571.1 | 0      | 0      | 0.2    | 0      | 0      | 0      |
| GAIF01030573.1 | 0.36   | 0.21   | 0.04   | 1.06   | 1.31   | 0      |
| GAIF01030574.1 | 3.84   | 2.52   | 0.9    | 4.59   | 3.57   | 0      |
| GAIF01030575.1 | 82.49  | 66.42  | 39.5   | 249.54 | 186.16 | 13.52  |
| GAIF01030578.1 | 0      | 0      | 0.05   | 0.1    | 0.16   | 0      |
| GAIF01030579.1 | 0      | 0      | 0.05   | 0      | 0      | 0      |
| GAIF01030581.1 | 0      | 0      | 0      | 0      | 0.24   | 0      |
| GAIF01030582.1 | 0.15   | 0      | 0      | 0      | 0.1    | 0      |
| GAIF01030583.1 | 52.45  | 39.19  | 24.59  | 57.3   | 42.6   | 8.12   |
| GAIF01030586.1 | 66.51  | 99.85  | 93.34  | 142.2  | 128.03 | 67.53  |
| GAIF01030587.1 | 0.32   | 0      | 0      | 0.06   | 0.32   | 0      |
| GAIF01030588.1 | 0      | 0      | 1.34   | 0      | 0      | 0      |
| GAIF01030589.1 | 0.75   | 0.25   | 0.11   | 5.03   | 13.95  | 5.29   |
| GAIF01030590.1 | 0.2    | 0      | 0.14   | 0      | 1.48   | 0      |
| GAIF01030591.1 | 0      | 0.04   | 0      | 0.05   | 0      | 0      |
| GAIF01030593.1 | 0      | 0      | 0      | 0      | 0.09   | 0      |
| GAIF01030594.1 | 0.15   | 0      | 0      | 0      | 0.73   | 0      |
| GAIF01030596.1 | 0.35   | 0.23   | 0.3    | 0.45   | 0.33   | 0.15   |
| GAIF01030597.1 | 1.01   | 1.9    | 0.32   | 6.39   | 4.35   | 0.56   |
| GAIF01030599.1 | 0      | 0      | 0      | 0      | 0.05   | 0      |
| GAIF01030601.1 | 31.79  | 6.6    | 9.24   | 21.57  | 5.39   | 3.44   |
| GAIF01030603.1 | 0      | 0      | 0      | 0.37   | 0      | 0      |
| GAIF01030604.1 | 0      | 0.08   | 0      | 0      | 0      | 0.02   |
| GAIF01030605.1 | 8.34   | 7.69   | 25.73  | 27.38  | 19.48  | 17.85  |
| GAIF01030606.1 | 0.03   | 0.06   | 0      | 0.1    | 0.17   | 0      |
| GAIF01030607.1 | 21.18  | 5.79   | 2.65   | 2.65   | 3.51   | 8.53   |
| GAIF01030609.1 | 0      | 0      | 0.23   | 0      | 0.3    | 0      |
| GAIF01030612.1 | 0.08   | 0.51   | 0.43   | 2.27   | 0.38   | 0      |
| GAIF01030614.1 | 44.6   | 38.91  | 36.21  | 126.08 | 55.88  | 35.45  |
| GAIF01030615.1 | 0.16   | 0.23   | 0.29   | 0.73   | 5.07   | 0.06   |
| GAIF01030616.1 | 3.28   | 1.56   | 0.34   | 2.38   | 0.12   | 0.11   |
| GAIF01030617.1 | 1.53   | 0      | 0      | 0      | 6.46   | 4.31   |
| GAIF01030618.1 | 0.4    | 0      | 1.34   | 0.57   | 0      | 0.64   |
| GAIF01030620.1 | 0      | 0      | 0.05   | 0.06   | 0.29   | 0      |

|                |        |         |        |        |        |        |
|----------------|--------|---------|--------|--------|--------|--------|
| GAIF01030621.1 | 0.1    | 0.19    | 1.17   | 0      | 0.04   | 0.23   |
| GAIF01030622.1 | 9.88   | 9.43    | 3.59   | 15.27  | 16.65  | 0.7    |
| GAIF01030623.1 | 0      | 0.12    | 0      | 0      | 1.68   | 0      |
| GAIF01030624.1 | 0      | 0       | 0      | 0      | 0.16   | 0      |
| GAIF01030625.1 | 1.02   | 1.22    | 1.28   | 0.9    | 0.89   | 0.77   |
| GAIF01030626.1 | 1.87   | 5.15    | 4.05   | 6.37   | 0.82   | 0      |
| GAIF01030629.1 | 1.72   | 0.87    | 0      | 4.52   | 9.65   | 0      |
| GAIF01030630.1 | 63.62  | 111.77  | 54.77  | 12.93  | 3.37   | 0.93   |
| GAIF01030631.1 | 1.86   | 2.3     | 0.91   | 0.67   | 0.85   | 0.11   |
| GAIF01030632.1 | 0      | 0       | 0      | 1.17   | 3.38   | 0.18   |
| GAIF01030633.1 | 9.78   | 9.85    | 3.74   | 19.47  | 22.55  | 0.49   |
| GAIF01030634.1 | 11.02  | 14.81   | 12.09  | 28.83  | 17.53  | 3.7    |
| GAIF01030637.1 | 0.08   | 0       | 0      | 0      | 0      | 0      |
| GAIF01030639.1 | 0.17   | 0.06    | 0.01   | 0      | 0.68   | 0      |
| GAIF01030642.1 | 0.05   | 0       | 0      | 0.12   | 0.19   | 0.91   |
| GAIF01030643.1 | 0.07   | 0.11    | 0      | 0.01   | 0      | 0      |
| GAIF01030644.1 | 0.19   | 0.08    | 0      | 0.98   | 4.23   | 0.24   |
| GAIF01030645.1 | 0.59   | 0       | 0      | 0      | 0      | 0.07   |
| GAIF01030646.1 | 0      | 0.08    | 0.05   | 0      | 0.2    | 0      |
| GAIF01030649.1 | 0      | 0.09    | 0      | 0      | 0      | 0      |
| GAIF01030651.1 | 0      | 0       | 0      | 0.21   | 0.14   | 0      |
| GAIF01030653.1 | 0      | 1.62    | 2.94   | 0      | 0.12   | 0.65   |
| GAIF01030654.1 | 716.76 | 1072.59 | 477.74 | 220.59 | 220.91 | 364.06 |
| GAIF01030655.1 | 4.87   | 3.85    | 2.43   | 1.2    | 0.83   | 0.05   |
| GAIF01030656.1 | 1.95   | 1.74    | 0.72   | 2.49   | 4.11   | 1.23   |
| GAIF01030657.1 | 18.68  | 18.52   | 12.52  | 20.03  | 21.19  | 3.19   |
| GAIF01030658.1 | 0      | 0.14    | 0      | 0      | 0.16   | 0      |
| GAIF01030660.1 | 0      | 0       | 0      | 0.19   | 0      | 0      |
| GAIF01030661.1 | 1.27   | 0.55    | 0      | 0.39   | 0.2    | 0      |
| GAIF01030662.1 | 0.16   | 0       | 0.35   | 1.66   | 8.61   | 0      |
| GAIF01030665.1 | 0      | 0       | 0.02   | 0.1    | 0.5    | 0.12   |
| GAIF01030666.1 | 8.47   | 11.33   | 11.84  | 12.53  | 6.49   | 4.34   |
| GAIF01030667.1 | 10.08  | 1.33    | 4.82   | 0      | 1.09   | 7.78   |
| GAIF01030668.1 | 0      | 0       | 0      | 0.04   | 0.02   | 0      |
| GAIF01030670.1 | 0      | 0       | 0      | 0      | 0.06   | 0      |
| GAIF01030671.1 | 7.59   | 7.42    | 11     | 15.07  | 9.93   | 12.74  |
| GAIF01030672.1 | 0.13   | 0.25    | 0.15   | 0.19   | 0.22   | 0.17   |
| GAIF01030673.1 | 0      | 0.5     | 0.5    | 0      | 0      | 1.09   |
| GAIF01030674.1 | 25.74  | 28.09   | 26.44  | 48.23  | 41.13  | 16.01  |
| GAIF01030675.1 | 0      | 0       | 0      | 0.07   | 0      | 0      |
| GAIF01030676.1 | 41.33  | 12.39   | 12.24  | 34.3   | 48.24  | 196.12 |
| GAIF01030677.1 | 0.71   | 0.52    | 0.21   | 1.16   | 3.08   | 0      |
| GAIF01030678.1 | 0      | 0.1     | 0      | 0      | 0      | 0      |
| GAIF01030679.1 | 20.79  | 12.32   | 6.05   | 54.61  | 63.31  | 13.95  |

|                |        |         |         |        |        |        |
|----------------|--------|---------|---------|--------|--------|--------|
| GAIF01030680.1 | 18.21  | 21.44   | 5.62    | 23.3   | 24.47  | 1.68   |
| GAIF01030681.1 | 3.44   | 2.02    | 2.55    | 0.43   | 0.45   | 0.31   |
| GAIF01030682.1 | 0      | 0       | 0       | 0.04   | 0      | 0      |
| GAIF01030684.1 | 0      | 0       | 0       | 0      | 0.28   | 0      |
| GAIF01030685.1 | 0.26   | 0       | 0       | 0      | 0      | 0      |
| GAIF01030686.1 | 1.55   | 0.1     | 0.03    | 10.66  | 23.27  | 2.09   |
| GAIF01030687.1 | 0      | 0.07    | 0       | 0      | 0.18   | 0      |
| GAIF01030688.1 | 11.15  | 12.01   | 11.84   | 48.85  | 56.78  | 6.62   |
| GAIF01030689.1 | 1.71   | 1.29    | 0.33    | 1.38   | 2.37   | 0.61   |
| GAIF01030690.1 | 0.09   | 0       | 0       | 0.29   | 0      | 0      |
| GAIF01030691.1 | 14.25  | 18.02   | 11.1    | 40.76  | 21.54  | 7.37   |
| GAIF01030692.1 | 151.74 | 184.68  | 518.26  | 138.83 | 99.97  | 343.86 |
| GAIF01030693.1 | 12.9   | 13.59   | 10.65   | 30.71  | 22.06  | 3.37   |
| GAIF01030694.1 | 6.97   | 4.95    | 4.47    | 17.97  | 19.84  | 5.08   |
| GAIF01030695.1 | 16.9   | 26.14   | 32      | 33.3   | 16.23  | 11.5   |
| GAIF01030698.1 | 37.27  | 43.23   | 54.74   | 127.82 | 78.26  | 40.15  |
| GAIF01030699.1 | 0.08   | 0       | 0       | 0.15   | 1.28   | 0      |
| GAIF01030700.1 | 0.35   | 0       | 0.37    | 0      | 0      | 1.18   |
| GAIF01030701.1 | 0      | 0       | 0       | 0      | 0.2    | 0      |
| GAIF01030703.1 | 16.12  | 36.06   | 26.85   | 46.46  | 24.35  | 11     |
| GAIF01030704.1 | 0.23   | 0.47    | 0.45    | 1.35   | 2.41   | 0.05   |
| GAIF01030705.1 | 0.39   | 0.12    | 0.12    | 1.45   | 2.87   | 0.1    |
| GAIF01030707.1 | 166.58 | 102.79  | 70.73   | 880    | 795.19 | 171.58 |
| GAIF01030709.1 | 0.12   | 0.98    | 0.67    | 0.58   | 0.18   | 0.12   |
| GAIF01030711.1 | 14.95  | 20.31   | 4.86    | 23.42  | 34.8   | 17.38  |
| GAIF01030712.1 | 28.4   | 18.11   | 15.35   | 27.2   | 29.59  | 10.24  |
| GAIF01030713.1 | 0.19   | 0.73    | 1.31    | 0      | 0.23   | 0.42   |
| GAIF01030714.1 | 0      | 0.11    | 0.14    | 0      | 0      | 0      |
| GAIF01030715.1 | 1.51   | 0.55    | 0.37    | 0.49   | 1.42   | 0.09   |
| GAIF01030716.1 | 18.12  | 24.62   | 19.89   | 1.28   | 0.88   | 0.54   |
| GAIF01030717.1 | 5.69   | 1.54    | 2.85    | 3.71   | 2.94   | 0.77   |
| GAIF01030718.1 | 2.65   | 4.1     | 4.71    | 1.82   | 4.02   | 1.03   |
| GAIF01030720.1 | 20.42  | 18.19   | 21.32   | 31.12  | 20.31  | 20.96  |
| GAIF01030721.1 | 3.8    | 2.97    | 2       | 5.85   | 2.39   | 0.73   |
| GAIF01030722.1 | 0.18   | 0.2     | 0       | 1.67   | 3.83   | 0.2    |
| GAIF01030723.1 | 0      | 0       | 0       | 0      | 0.1    | 0      |
| GAIF01030725.1 | 0      | 0.77    | 0.56    | 0      | 0      | 0.06   |
| GAIF01030727.1 | 0      | 0       | 0       | 0.12   | 0.24   | 0.11   |
| GAIF01030729.1 | 0      | 0       | 0       | 0.19   | 0.47   | 0.05   |
| GAIF01030731.1 | 1880.6 | 1215.89 | 3052.69 | 501.86 | 112.01 | 336.74 |
| GAIF01030732.1 | 59.16  | 79.54   | 54.44   | 131.77 | 73.41  | 15.83  |
| GAIF01030734.1 | 0.96   | 6.44    | 2.52    | 13.25  | 10.4   | 2.96   |
| GAIF01030736.1 | 0      | 0       | 0       | 0      | 0.07   | 0      |
| GAIF01030737.1 | 0.06   | 0.19    | 0.26    | 0.41   | 0.21   | 0.19   |

|                |        |        |        |        |        |        |
|----------------|--------|--------|--------|--------|--------|--------|
| GAIF01030739.1 | 0      | 0.93   | 7.69   | 1.85   | 5.43   | 4.2    |
| GAIF01030741.1 | 0      | 0      | 0      | 0.33   | 0      | 0      |
| GAIF01030742.1 | 3.98   | 0      | 0      | 5.14   | 27.73  | 1.03   |
| GAIF01030743.1 | 0.32   | 0.71   | 0      | 0.24   | 0.49   | 0.09   |
| GAIF01030744.1 | 1.92   | 0.25   | 0      | 5.97   | 18.05  | 1.29   |
| GAIF01030745.1 | 5.84   | 6.46   | 7.37   | 21.05  | 10.41  | 3.78   |
| GAIF01030746.1 | 0      | 0      | 0.16   | 0      | 0      | 0      |
| GAIF01030748.1 | 7.08   | 8      | 5.21   | 10.06  | 4.3    | 2.05   |
| GAIF01030749.1 | 24.34  | 176.12 | 437.72 | 1.15   | 2.08   | 53.51  |
| GAIF01030750.1 | 0      | 0      | 0.12   | 2.38   | 5.06   | 0.24   |
| GAIF01030753.1 | 2.6    | 5.62   | 0      | 14.42  | 18.18  | 0      |
| GAIF01030754.1 | 3.92   | 0.4    | 0      | 2.82   | 2.5    | 0.81   |
| GAIF01030756.1 | 12.18  | 18.26  | 6.33   | 19.42  | 40.81  | 1.31   |
| GAIF01030757.1 | 0      | 0      | 0.05   | 0.29   | 2.22   | 0.03   |
| GAIF01030760.1 | 1.61   | 4.92   | 2.14   | 0.93   | 4.25   | 0.37   |
| GAIF01030762.1 | 39.94  | 41.49  | 55.03  | 21.01  | 9.82   | 14.69  |
| GAIF01030763.1 | 47.27  | 12.34  | 18.68  | 4.39   | 0.97   | 0.99   |
| GAIF01030765.1 | 0.44   | 0.47   | 0      | 1.52   | 3.15   | 0.24   |
| GAIF01030766.1 | 0      | 1.4    | 2.16   | 0      | 0      | 0.17   |
| GAIF01030768.1 | 4.45   | 8.85   | 4.03   | 11.99  | 32.08  | 0.31   |
| GAIF01030769.1 | 129.57 | 152.37 | 92.87  | 0      | 0.15   | 0.14   |
| GAIF01030770.1 | 0.6    | 0.09   | 0.09   | 1      | 2.78   | 0      |
| GAIF01030771.1 | 0.82   | 1.19   | 0.15   | 0.16   | 0.66   | 0.3    |
| GAIF01030772.1 | 1.98   | 1.32   | 2.84   | 7.42   | 5.86   | 2.85   |
| GAIF01030773.1 | 0.08   | 0.37   | 0.29   | 0.09   | 0.18   | 0.25   |
| GAIF01030774.1 | 0.18   | 0.07   | 0      | 0.14   | 0.07   | 0.07   |
| GAIF01030775.1 | 5.52   | 17.64  | 5.66   | 16.24  | 9.62   | 0.24   |
| GAIF01030776.1 | 27.65  | 3.57   | 0.7    | 31.96  | 58.35  | 1.56   |
| GAIF01030779.1 | 0.66   | 0.38   | 0.17   | 2.21   | 8.43   | 0.44   |
| GAIF01030780.1 | 730.52 | 424.98 | 157.67 | 358.72 | 286.58 | 250.12 |
| GAIF01030781.1 | 2.79   | 2.74   | 1.46   | 14.64  | 26.83  | 0.77   |
| GAIF01030782.1 | 0.01   | 0.83   | 2.51   | 0.01   | 0.11   | 0.12   |
| GAIF01030784.1 | 4.85   | 4.8    | 3.53   | 2.17   | 1.67   | 1.22   |
| GAIF01030785.1 | 31.48  | 27.89  | 23.69  | 47.25  | 22.07  | 7.94   |
| GAIF01030787.1 | 1.94   | 5.23   | 4.94   | 2.26   | 1.85   | 0.56   |
| GAIF01030788.1 | 1.74   | 4.76   | 1.91   | 3.98   | 9.38   | 0.35   |
| GAIF01030789.1 | 28.42  | 27.28  | 26.95  | 29.71  | 20.05  | 15.75  |
| GAIF01030790.1 | 0      | 0.11   | 0      | 0.68   | 2.48   | 0.42   |
| GAIF01030791.1 | 0      | 0      | 0.16   | 0      | 0.27   | 0      |
| GAIF01030792.1 | 0.16   | 0      | 0      | 2.92   | 10.5   | 0.61   |
| GAIF01030794.1 | 0      | 0      | 0.18   | 0.05   | 0.05   | 0.05   |
| GAIF01030795.1 | 0      | 0      | 0.03   | 0      | 0      | 0      |
| GAIF01030797.1 | 28.98  | 59.55  | 31.37  | 69.75  | 49.28  | 7.02   |
| GAIF01030798.1 | 0.5    | 0.99   | 1.18   | 0.86   | 1.29   | 0.55   |

|                |        |        |        |        |        |         |
|----------------|--------|--------|--------|--------|--------|---------|
| GAIF01030799.1 | 0.05   | 0.12   | 0.18   | 1.06   | 4.26   | 0.35    |
| GAIF01030801.1 | 0      | 0      | 0      | 0.38   | 0.59   | 0.18    |
| GAIF01030802.1 | 0.76   | 0.26   | 0.04   | 0.74   | 2.4    | 0.09    |
| GAIF01030805.1 | 157    | 452.31 | 195.87 | 95.11  | 313.55 | 55.92   |
| GAIF01030806.1 | 480.38 | 56.36  | 97.32  | 472.75 | 461.28 | 6983.56 |
| GAIF01030807.1 | 32.84  | 25.07  | 26.73  | 27.05  | 20.79  | 13.01   |
| GAIF01030808.1 | 18.47  | 37.73  | 72.89  | 25.13  | 20.96  | 23.14   |
| GAIF01030809.1 | 0.25   | 0.15   | 0.13   | 1.29   | 4.82   | 0.13    |
| GAIF01030810.1 | 0      | 0      | 0      | 0      | 0.65   | 0       |
| GAIF01030811.1 | 0.13   | 0      | 0      | 0.08   | 0.04   | 0.04    |
| GAIF01030813.1 | 0      | 0      | 0      | 0      | 0.42   | 0       |
| GAIF01030814.1 | 9.46   | 7.6    | 20.98  | 1.6    | 0.24   | 1.3     |
| GAIF01030815.1 | 5.38   | 7.94   | 6.3    | 8.5    | 5.76   | 2.33    |
| GAIF01030816.1 | 0      | 0      | 0.34   | 0      | 0      | 0       |
| GAIF01030817.1 | 7.66   | 5.62   | 4.54   | 36.61  | 35.27  | 6.07    |
| GAIF01030819.1 | 0      | 0      | 0      | 0      | 10.38  | 0       |
| GAIF01030820.1 | 14.37  | 13.37  | 9.14   | 28.1   | 17.55  | 9.29    |
| GAIF01030825.1 | 0.1    | 0.22   | 0.22   | 0.24   | 0      | 0.45    |
| GAIF01030826.1 | 0      | 0      | 0      | 0.09   | 0.09   | 0       |
| GAIF01030827.1 | 0.24   | 0      | 0      | 0      | 0.29   | 1.08    |
| GAIF01030828.1 | 0      | 0.04   | 0      | 0.43   | 0.99   | 0       |
| GAIF01030829.1 | 3      | 3.38   | 7.83   | 1.21   | 0.87   | 4.81    |
| GAIF01030830.1 | 5      | 2.45   | 1.37   | 16.12  | 37.13  | 6.33    |
| GAIF01030832.1 | 0.33   | 0.72   | 0.36   | 0.29   | 0      | 0.36    |
| GAIF01030835.1 | 9.81   | 17.3   | 16.02  | 26.85  | 15.35  | 8.24    |
| GAIF01030836.1 | 15.18  | 7.21   | 7.99   | 34.19  | 76.4   | 4.1     |
| GAIF01030838.1 | 0      | 0      | 0      | 3.65   | 3.92   | 0       |
| GAIF01030839.1 | 28.55  | 21.94  | 47.7   | 84.82  | 65.04  | 45.02   |
| GAIF01030840.1 | 0.48   | 0.43   | 0      | 1.11   | 0      | 0       |
| GAIF01030841.1 | 0      | 0      | 0      | 0.04   | 0.05   | 0.06    |
| GAIF01030842.1 | 0      | 0      | 0      | 1.56   | 0      | 0       |
| GAIF01030843.1 | 0.07   | 0      | 0      | 0      | 0      | 0       |
| GAIF01030845.1 | 5.18   | 2.4    | 2.48   | 3.86   | 3.3    | 3.79    |
| GAIF01030848.1 | 58.47  | 79.86  | 92.81  | 91.82  | 65.06  | 73.23   |
| GAIF01030849.1 | 0.09   | 0.04   | 0      | 0.15   | 0.44   | 0.16    |
| GAIF01030850.1 | 1.15   | 0.21   | 0.58   | 0.29   | 0.71   | 0.6     |
| GAIF01030851.1 | 0.15   | 0.32   | 0      | 0      | 0.18   | 0       |
| GAIF01030853.1 | 0      | 0.14   | 0      | 1.29   | 6.35   | 0       |
| GAIF01030856.1 | 0.35   | 0.13   | 0      | 1.66   | 7.42   | 0.77    |
| GAIF01030859.1 | 56.08  | 57.13  | 81.58  | 131.16 | 103.65 | 86.89   |
| GAIF01030863.1 | 0.1    | 0      | 0      | 0.12   | 0.97   | 0       |
| GAIF01030864.1 | 21.51  | 26.21  | 27.68  | 36.23  | 19.29  | 12.66   |
| GAIF01030865.1 | 23.38  | 2.8    | 8.48   | 17.43  | 11.09  | 38.77   |
| GAIF01030866.1 | 13.48  | 10.69  | 11.74  | 19.97  | 8.03   | 24.7    |

|                |         |         |        |         |         |        |
|----------------|---------|---------|--------|---------|---------|--------|
| GAIF01030868.1 | 0       | 0       | 0.16   | 0       | 0       | 0      |
| GAIF01030869.1 | 28.74   | 30.06   | 7.87   | 18.27   | 27.63   | 6.63   |
| GAIF01030871.1 | 0       | 0       | 0      | 0       | 0       | 0.56   |
| GAIF01030872.1 | 0       | 0       | 0.37   | 0.15    | 0       | 0      |
| GAIF01030873.1 | 464.64  | 225.67  | 462.16 | 349.27  | 137.54  | 213.95 |
| GAIF01030874.1 | 137.44  | 322.94  | 193.13 | 17.05   | 23.08   | 26.86  |
| GAIF01030876.1 | 0       | 0       | 0      | 0.42    | 2.18    | 0      |
| GAIF01030877.1 | 10.51   | 9.41    | 16.18  | 11.12   | 3.31    | 11.28  |
| GAIF01030878.1 | 19      | 13.82   | 11.17  | 29.72   | 47.94   | 6.97   |
| GAIF01030880.1 | 4.35    | 2.87    | 6.37   | 1.38    | 0.48    | 1.6    |
| GAIF01030881.1 | 0       | 0       | 0.27   | 0.19    | 7.36    | 1.53   |
| GAIF01030882.1 | 3017.55 | 1826.06 | 785.37 | 1790.58 | 1544.97 | 528.67 |
| GAIF01030883.1 | 0       | 0.1     | 0.05   | 0       | 0.55    | 0.1    |
| GAIF01030886.1 | 38.45   | 33.91   | 42.34  | 28.75   | 25.36   | 17.38  |
| GAIF01030887.1 | 56.18   | 43.78   | 26.4   | 147.95  | 179.97  | 15.9   |
| GAIF01030888.1 | 0       | 0.11    | 0      | 0.06    | 0       | 0      |
| GAIF01030889.1 | 6.75    | 0.99    | 0      | 8.26    | 25.23   | 35.59  |
| GAIF01030890.1 | 2.34    | 1.19    | 0.64   | 8.07    | 12.85   | 1.69   |
| GAIF01030891.1 | 15.97   | 16.82   | 42.15  | 31.95   | 23.55   | 28.57  |
| GAIF01030892.1 | 0       | 0       | 0      | 0.04    | 0       | 0      |
| GAIF01030893.1 | 1.67    | 1.83    | 1.86   | 5.78    | 3.65    | 20.48  |
| GAIF01030894.1 | 0       | 0.1     | 0      | 0.74    | 2.64    | 0.3    |
| GAIF01030898.1 | 0       | 0       | 0      | 0.23    | 1.42    | 0      |
| GAIF01030899.1 | 4.88    | 33.26   | 12.16  | 1.16    | 9.41    | 1.93   |
| GAIF01030901.1 | 17.59   | 26.93   | 18.1   | 4.49    | 7.22    | 1.36   |
| GAIF01030902.1 | 9.68    | 4.68    | 2.42   | 23.06   | 32.3    | 5.77   |
| GAIF01030903.1 | 8.73    | 10.44   | 9.63   | 21.08   | 19.42   | 7.02   |
| GAIF01030906.1 | 0       | 12.95   | 3.89   | 0       | 0       | 0.19   |
| GAIF01030907.1 | 0       | 0       | 0      | 0       | 0.91    | 0.25   |
| GAIF01030908.1 | 0       | 0.24    | 0      | 0.26    | 0.39    | 0.1    |
| GAIF01030909.1 | 0       | 0.1     | 0.05   | 0.17    | 0.29    | 0      |
| GAIF01030912.1 | 14.12   | 2.29    | 1.69   | 107.43  | 95.66   | 0.65   |
| GAIF01030914.1 | 0.01    | 0       | 0.04   | 0.12    | 0       | 0.01   |
| GAIF01030915.1 | 0.08    | 0.07    | 0      | 0.08    | 0       | 0.04   |
| GAIF01030916.1 | 1.8     | 0.29    | 0.15   | 1.73    | 6.37    | 3.46   |
| GAIF01030918.1 | 0       | 0       | 0      | 0       | 0.18    | 0      |
| GAIF01030919.1 | 0       | 0.13    | 0.05   | 0.25    | 0.45    | 0.09   |
| GAIF01030920.1 | 0       | 0       | 0      | 0.22    | 0       | 0      |
| GAIF01030922.1 | 0.12    | 0       | 0      | 0       | 0.14    | 0      |
| GAIF01030924.1 | 0.4     | 0.24    | 0.35   | 0.81    | 3.54    | 0.55   |
| GAIF01030928.1 | 6.86    | 2.99    | 0      | 14.52   | 16.29   | 7.72   |
| GAIF01030929.1 | 0.58    | 0       | 0.11   | 1.86    | 6.97    | 0.11   |
| GAIF01030930.1 | 0.04    | 0.04    | 0      | 0.13    | 0.18    | 0      |
| GAIF01030933.1 | 0       | 0       | 0.2    | 0       | 0       | 0      |



|                |        |        |        |        |        |        |
|----------------|--------|--------|--------|--------|--------|--------|
| GAIF01030934.1 | 0      | 0.11   | 0      | 0      | 0      | 0      |
| GAIF01030935.1 | 0.66   | 2.59   | 1.9    | 1.62   | 0.37   | 0      |
| GAIF01030937.1 | 0      | 0      | 0      | 0.63   | 3.43   | 0      |
| GAIF01030940.1 | 116.42 | 43.06  | 38.16  | 121.67 | 174.24 | 87.82  |
| GAIF01030941.1 | 0      | 3.11   | 0      | 0      | 37.51  | 0      |
| GAIF01030942.1 | 13.26  | 18.14  | 3.21   | 19.74  | 40.07  | 0.77   |
| GAIF01030943.1 | 0.06   | 0      | 0      | 0.07   | 0.22   | 0      |
| GAIF01030946.1 | 0.11   | 0.12   | 0.06   | 0.25   | 0      | 0      |
| GAIF01030948.1 | 0.2    | 0      | 0.27   | 0.61   | 0.43   | 0.21   |
| GAIF01030951.1 | 0      | 0.16   | 0      | 0.17   | 0.18   | 0      |
| GAIF01030952.1 | 0.2    | 0      | 0.22   | 0.72   | 1.99   | 0.11   |
| GAIF01030955.1 | 0.22   | 0.05   | 0.17   | 0      | 0.17   | 0      |
| GAIF01030957.1 | 2.63   | 0.23   | 0.31   | 2.46   | 3.31   | 1.75   |
| GAIF01030958.1 | 9.5    | 13.77  | 4.91   | 7.92   | 11.04  | 1.28   |
| GAIF01030960.1 | 7.43   | 3.86   | 2.46   | 20.08  | 23.31  | 10.02  |
| GAIF01030961.1 | 0      | 0      | 0      | 0      | 0      | 0.08   |
| GAIF01030962.1 | 0      | 0      | 0      | 0      | 0      | 0.07   |
| GAIF01030963.1 | 0.54   | 0.08   | 0.34   | 1.61   | 1.58   | 0      |
| GAIF01030966.1 | 0.12   | 0      | 0      | 0.13   | 0.56   | 0      |
| GAIF01030967.1 | 0.21   | 0.22   | 0      | 0.03   | 0      | 0      |
| GAIF01030968.1 | 0.54   | 0.23   | 0.2    | 2.38   | 1.47   | 0.47   |
| GAIF01030970.1 | 19.33  | 19.03  | 15.79  | 40.25  | 25.95  | 10.18  |
| GAIF01030971.1 | 0.05   | 0.32   | 0.31   | 0      | 0      | 0.05   |
| GAIF01030972.1 | 0      | 0.07   | 0      | 0      | 0      | 0      |
| GAIF01030973.1 | 491.43 | 426.27 | 638.87 | 382.44 | 145.79 | 242.83 |
| GAIF01030974.1 | 0.46   | 2.01   | 0.07   | 0.15   | 0.27   | 0.34   |
| GAIF01030975.1 | 0.04   | 0.06   | 0.08   | 0.17   | 0.22   | 0.18   |
| GAIF01030978.1 | 20.58  | 4.6    | 4.94   | 0.19   | 0.06   | 0.06   |
| GAIF01030979.1 | 1.24   | 2.36   | 0.14   | 4.28   | 14.6   | 0.61   |
| GAIF01030980.1 | 0.5    | 0      | 0      | 1      | 3.62   | 0.16   |
| GAIF01030982.1 | 0.07   | 0      | 0      | 0      | 0      | 0      |
| GAIF01030983.1 | 0.25   | 0.38   | 0.49   | 1.68   | 5.45   | 0.3    |
| GAIF01030984.1 | 0.66   | 1.33   | 1.02   | 1.08   | 2.07   | 0.58   |
| GAIF01030985.1 | 0      | 0      | 0      | 0      | 0.28   | 0      |
| GAIF01030986.1 | 0      | 0      | 0      | 0.05   | 0      | 0      |
| GAIF01030990.1 | 0.93   | 0.23   | 0      | 2.24   | 10.15  | 0.2    |
| GAIF01030991.1 | 0.1    | 0.15   | 0      | 1.35   | 4.37   | 0.08   |
| GAIF01030992.1 | 8.15   | 5.01   | 4.83   | 32.2   | 57.94  | 22.39  |
| GAIF01030993.1 | 0      | 0      | 0.04   | 0      | 0      | 0      |
| GAIF01030994.1 | 0.92   | 0.29   | 0      | 1.73   | 5.2    | 0.23   |
| GAIF01030995.1 | 18.53  | 20.05  | 13.7   | 34.44  | 29.45  | 2.7    |
| GAIF01030996.1 | 0.33   | 0      | 0      | 0.12   | 0      | 0      |
| GAIF01030997.1 | 0      | 0      | 0      | 0      | 0.19   | 0      |
| GAIF01030998.1 | 18.47  | 26.3   | 13.44  | 47.47  | 26.36  | 4.85   |

|                |        |       |       |       |       |       |
|----------------|--------|-------|-------|-------|-------|-------|
| GAIF01030999.1 | 0      | 0.07  | 0.07  | 0     | 0     | 0     |
| GAIF01031000.1 | 0      | 0     | 0     | 0     | 0.06  | 0     |
| GAIF01031002.1 | 15.25  | 25.44 | 25.37 | 37.36 | 21.04 | 10.42 |
| GAIF01031003.1 | 0.32   | 0.21  | 0     | 1.26  | 3.56  | 0.07  |
| GAIF01031004.1 | 0.21   | 0.08  | 0.2   | 0.35  | 0.37  | 0.04  |
| GAIF01031005.1 | 22.29  | 22.32 | 21.64 | 12.64 | 10.14 | 11.27 |
| GAIF01031006.1 | 1.32   | 0.51  | 1.06  | 1.23  | 0.91  | 0.64  |
| GAIF01031007.1 | 1.81   | 3.7   | 2.95  | 1.64  | 3.01  | 0     |
| GAIF01031009.1 | 15.91  | 21.64 | 28.74 | 66.22 | 54.47 | 21.15 |
| GAIF01031010.1 | 4.24   | 1.64  | 0.77  | 0.46  | 0.18  | 0.24  |
| GAIF01031011.1 | 0      | 0     | 0     | 0     | 2.44  | 0.56  |
| GAIF01031012.1 | 22.03  | 33.74 | 10.66 | 35.35 | 33.31 | 0.68  |
| GAIF01031013.1 | 8.33   | 4.38  | 0.29  | 28.99 | 81.24 | 14.51 |
| GAIF01031014.1 | 0      | 0     | 0     | 0.72  | 0.62  | 0     |
| GAIF01031021.1 | 107.88 | 51.3  | 50.28 | 18.94 | 10.07 | 1.64  |
| GAIF01031022.1 | 0.23   | 0     | 0     | 0.18  | 1     | 0.17  |
| GAIF01031024.1 | 9.88   | 7.39  | 1.27  | 46    | 35.28 | 4.27  |
| GAIF01031026.1 | 0      | 0.04  | 0     | 0     | 0     | 0     |
| GAIF01031027.1 | 0      | 0.08  | 0.23  | 0     | 0.12  | 0.08  |
| GAIF01031028.1 | 0      | 0.47  | 0.27  | 0     | 0     | 0.56  |
| GAIF01031029.1 | 0.15   | 0.04  | 0     | 0.38  | 1.96  | 0.16  |
| GAIF01031031.1 | 0.15   | 0.1   | 0.16  | 2.02  | 6.17  | 0.05  |
| GAIF01031032.1 | 9.67   | 14.24 | 1.56  | 25.52 | 43.01 | 0.81  |
| GAIF01031033.1 | 1.3    | 1.48  | 1.93  | 1.49  | 1.79  | 0.66  |
| GAIF01031035.1 | 0      | 0     | 0     | 0     | 1.23  | 0     |
| GAIF01031036.1 | 5.72   | 11.87 | 9.73  | 8.5   | 6.8   | 3.68  |
| GAIF01031038.1 | 0      | 0.21  | 0.07  | 0.15  | 1.06  | 0.07  |
| GAIF01031040.1 | 0      | 0.27  | 0     | 0.03  | 0.91  | 0     |
| GAIF01031041.1 | 0.76   | 0     | 0     | 0.22  | 2.43  | 0.07  |
| GAIF01031043.1 | 0      | 0     | 0     | 0     | 0.02  | 0     |
| GAIF01031044.1 | 11.23  | 23.43 | 12.67 | 24.04 | 15.93 | 3.52  |
| GAIF01031045.1 | 8.21   | 10.01 | 4.4   | 9.43  | 14.14 | 0.48  |
| GAIF01031046.1 | 11.76  | 9.25  | 20.64 | 29.46 | 0     | 22.9  |
| GAIF01031047.1 | 0.29   | 0.23  | 0     | 0.92  | 7.14  | 0     |
| GAIF01031048.1 | 0.6    | 0.22  | 0.07  | 3.86  | 18.58 | 0.22  |
| GAIF01031049.1 | 0      | 0     | 0     | 0     | 0.63  | 0     |
| GAIF01031052.1 | 0.06   | 0.06  | 0     | 0.32  | 0.26  | 0     |
| GAIF01031054.1 | 0.16   | 0.36  | 0     | 0     | 0     | 0     |
| GAIF01031058.1 | 0.04   | 0     | 0     | 0.09  | 0.24  | 0     |
| GAIF01031059.1 | 10.46  | 22.33 | 25.68 | 12.18 | 59.6  | 9.57  |
| GAIF01031060.1 | 0.16   | 0.81  | 3.71  | 0.19  | 0.19  | 0     |
| GAIF01031061.1 | 0      | 0     | 0     | 0.25  | 0     | 0     |
| GAIF01031062.1 | 0      | 0.41  | 0.41  | 0     | 0     | 0     |
| GAIF01031063.1 | 0.71   | 0     | 0.14  | 1.26  | 4.84  | 0.07  |

|                |        |       |        |        |       |        |
|----------------|--------|-------|--------|--------|-------|--------|
| GAIF01031064.1 | 0.22   | 0.24  | 0.26   | 0.09   | 0     | 0      |
| GAIF01031065.1 | 58.22  | 66.11 | 90.02  | 37.19  | 28.84 | 72.33  |
| GAIF01031066.1 | 0.36   | 0.25  | 0      | 0      | 0.08  | 0      |
| GAIF01031067.1 | 0.47   | 0     | 0      | 0      | 0     | 0      |
| GAIF01031070.1 | 0      | 0     | 0      | 0      | 0.63  | 0.15   |
| GAIF01031073.1 | 7.73   | 14.12 | 9.02   | 5.61   | 3.82  | 0.08   |
| GAIF01031075.1 | 0.13   | 0     | 0      | 0.07   | 0.68  | 0.07   |
| GAIF01031076.1 | 0      | 0     | 0      | 0      | 1.02  | 0      |
| GAIF01031077.1 | 22.31  | 13.4  | 9.18   | 55.71  | 43.55 | 5.46   |
| GAIF01031078.1 | 0.27   | 0     | 0.06   | 1.14   | 8.04  | 0.28   |
| GAIF01031080.1 | 2.89   | 0.89  | 0      | 8.06   | 34.47 | 0.56   |
| GAIF01031082.1 | 1.31   | 0     | 0      | 5.59   | 18.95 | 0.32   |
| GAIF01031083.1 | 0.07   | 0.14  | 0      | 0      | 0     | 0      |
| GAIF01031084.1 | 0      | 0     | 0.04   | 0      | 0     | 0      |
| GAIF01031086.1 | 1.27   | 0.62  | 1.18   | 3.52   | 8.02  | 0.81   |
| GAIF01031088.1 | 44.01  | 0     | 3.72   | 30.19  | 10.3  | 27.26  |
| GAIF01031089.1 | 139.04 | 71.69 | 118.83 | 120.45 | 98.01 | 256.35 |
| GAIF01031091.1 | 8.24   | 13.53 | 5.86   | 19.32  | 28.18 | 0.89   |
| GAIF01031092.1 | 0      | 0     | 0      | 0.16   | 1.72  | 0      |
| GAIF01031093.1 | 16.09  | 13.6  | 13.13  | 5.02   | 3.57  | 3.57   |
| GAIF01031095.1 | 7.47   | 5.31  | 12.58  | 15.84  | 13.06 | 4.94   |
| GAIF01031096.1 | 70.02  | 59.48 | 54.39  | 47.03  | 40.15 | 15.87  |
| GAIF01031099.1 | 31.02  | 30.91 | 62.41  | 67.15  | 31.93 | 45.32  |
| GAIF01031100.1 | 0      | 0     | 0      | 0.23   | 0.78  | 0      |
| GAIF01031102.1 | 2.72   | 4.96  | 3.39   | 5.13   | 3.01  | 1.38   |
| GAIF01031105.1 | 0      | 0     | 0.07   | 0      | 0     | 0      |
| GAIF01031106.1 | 0.06   | 0.01  | 0.07   | 0.13   | 1.5   | 1.13   |
| GAIF01031107.1 | 24.35  | 9.26  | 2.06   | 175.39 | 498.2 | 3.33   |
| GAIF01031108.1 | 0      | 0.09  | 0      | 0      | 0.1   | 0      |
| GAIF01031110.1 | 8.41   | 11.31 | 2.21   | 2.85   | 3.03  | 0      |
| GAIF01031115.1 | 38.95  | 38.4  | 54.98  | 30.05  | 27.76 | 40.41  |
| GAIF01031118.1 | 0      | 0.27  | 0      | 0      | 2.11  | 0      |
| GAIF01031119.1 | 268.23 | 69.84 | 67.33  | 70.94  | 35.21 | 33.01  |
| GAIF01031120.1 | 0      | 0     | 0      | 0.13   | 0.84  | 0      |
| GAIF01031121.1 | 0.07   | 0     | 0      | 0      | 0     | 0      |
| GAIF01031122.1 | 13.41  | 10.95 | 2.63   | 5.73   | 3.64  | 0.33   |
| GAIF01031123.1 | 4.39   | 3.83  | 6.3    | 2.11   | 1.42  | 2.64   |
| GAIF01031124.1 | 0.64   | 0     | 0.42   | 0      | 1.99  | 0.28   |
| GAIF01031125.1 | 0      | 0.05  | 0      | 0.05   | 1.96  | 0.08   |
| GAIF01031127.1 | 15.26  | 15.09 | 6.55   | 2.33   | 1.1   | 0.13   |
| GAIF01031128.1 | 0      | 0.25  | 1.11   | 0      | 0     | 0      |
| GAIF01031130.1 | 1.26   | 0.76  | 0.8    | 0      | 0     | 0      |
| GAIF01031132.1 | 17.77  | 21.21 | 27.26  | 25.06  | 24.97 | 9.71   |
| GAIF01031133.1 | 0      | 0     | 0      | 0      | 0.05  | 0      |

|                |       |       |       |       |       |       |
|----------------|-------|-------|-------|-------|-------|-------|
| GAIF01031135.1 | 9.5   | 3.53  | 4.67  | 3.34  | 1.8   | 1.65  |
| GAIF01031136.1 | 0     | 0.75  | 0.93  | 0     | 0     | 1.19  |
| GAIF01031137.1 | 0.13  | 0.27  | 0     | 0.44  | 0.45  | 0.14  |
| GAIF01031138.1 | 6.82  | 13.58 | 14.26 | 49.2  | 29.26 | 4.53  |
| GAIF01031140.1 | 21.9  | 16.18 | 13.89 | 22.33 | 20.92 | 6     |
| GAIF01031141.1 | 14.51 | 9.04  | 9.86  | 15.78 | 15.24 | 16.9  |
| GAIF01031142.1 | 0.45  | 0.41  | 0.09  | 0.55  | 0.5   | 0.13  |
| GAIF01031144.1 | 0.04  | 0.01  | 0     | 0     | 0.08  | 0     |
| GAIF01031146.1 | 0.27  | 0.1   | 0     | 1.88  | 6.56  | 0.2   |
| GAIF01031147.1 | 0.28  | 0.45  | 0.3   | 0     | 0     | 0.15  |
| GAIF01031150.1 | 0.57  | 0.27  | 0.09  | 1.81  | 2.96  | 0.36  |
| GAIF01031151.1 | 0     | 0     | 0     | 0.21  | 0.44  | 0     |
| GAIF01031153.1 | 0     | 0     | 0     | 0     | 0.11  | 0     |
| GAIF01031154.1 | 0.13  | 0     | 0     | 0.72  | 2.64  | 0     |
| GAIF01031155.1 | 0.71  | 0     | 1.49  | 1.87  | 0     | 1.28  |
| GAIF01031156.1 | 36.97 | 32.33 | 23.07 | 24.32 | 38.14 | 12.5  |
| GAIF01031157.1 | 7.84  | 0     | 0     | 12.81 | 19.02 | 49.48 |
| GAIF01031158.1 | 5.18  | 0.97  | 0     | 18.37 | 34.34 | 3.1   |
| GAIF01031159.1 | 0.06  | 0     | 0.06  | 0     | 0.21  | 0     |
| GAIF01031160.1 | 0.67  | 1.56  | 0.94  | 0.44  | 1.38  | 0.21  |
| GAIF01031161.1 | 0.13  | 0     | 0.15  | 0     | 0     | 0     |
| GAIF01031162.1 | 73.35 | 47.96 | 34.09 | 59.17 | 44.85 | 23.07 |
| GAIF01031163.1 | 0.07  | 0.08  | 0     | 0.12  | 1.25  | 0     |
| GAIF01031164.1 | 14.83 | 12.84 | 9.24  | 5.7   | 9.34  | 23.6  |
| GAIF01031165.1 | 0     | 0.05  | 0     | 0     | 0.18  | 0     |
| GAIF01031171.1 | 4.56  | 0.37  | 0.75  | 1.85  | 1.64  | 3.39  |
| GAIF01031173.1 | 0     | 0.07  | 0     | 0.17  | 0.26  | 0     |
| GAIF01031174.1 | 0.33  | 0.53  | 0     | 3.11  | 6.55  | 0     |
| GAIF01031175.1 | 14.41 | 8.81  | 10.42 | 18.2  | 16.36 | 8.66  |
| GAIF01031177.1 | 3.83  | 1.9   | 2.04  | 3.62  | 1.99  | 1.31  |
| GAIF01031181.1 | 0.15  | 0.13  | 0     | 0.18  | 0.59  | 0     |
| GAIF01031182.1 | 0.41  | 0.43  | 0.59  | 1.49  | 1.55  | 1.79  |
| GAIF01031183.1 | 0     | 0     | 0     | 0     | 0.03  | 0     |
| GAIF01031184.1 | 0     | 0     | 0     | 0     | 0.11  | 0     |
| GAIF01031185.1 | 54.58 | 29.38 | 15.31 | 9.46  | 11.12 | 0.86  |
| GAIF01031186.1 | 18.66 | 8.33  | 10.94 | 52.12 | 92.96 | 31.33 |
| GAIF01031187.1 | 0     | 0.05  | 0     | 0     | 0.3   | 0     |
| GAIF01031188.1 | 0     | 0     | 0.28  | 0     | 0     | 0     |
| GAIF01031190.1 | 23.3  | 42.84 | 8.64  | 45.57 | 58.63 | 1.29  |
| GAIF01031191.1 | 13.08 | 9.48  | 8.57  | 9.91  | 3.82  | 4.3   |
| GAIF01031192.1 | 1.35  | 0.63  | 0.61  | 1.18  | 3.59  | 0.58  |
| GAIF01031193.1 | 0.72  | 0.91  | 0.4   | 0.28  | 1.01  | 0.26  |
| GAIF01031194.1 | 0     | 0     | 0     | 0     | 0.6   | 0.46  |
| GAIF01031195.1 | 0     | 0     | 0     | 0     | 0.27  | 0     |

|                |        |        |        |        |        |        |
|----------------|--------|--------|--------|--------|--------|--------|
| GAIF01031197.1 | 11.99  | 3.64   | 16.63  | 9.29   | 2.78   | 8.39   |
| GAIF01031200.1 | 0      | 0.02   | 0      | 0      | 0      | 0      |
| GAIF01031201.1 | 3.46   | 2.18   | 1.52   | 18.12  | 38.54  | 1.81   |
| GAIF01031202.1 | 0.33   | 0      | 0      | 0.19   | 1.8    | 0      |
| GAIF01031205.1 | 3.67   | 0.3    | 0.2    | 1.07   | 1.99   | 0.4    |
| GAIF01031206.1 | 1.58   | 0      | 0      | 0.52   | 6.95   | 0.73   |
| GAIF01031209.1 | 0      | 0.32   | 0.11   | 1.69   | 2.8    | 0      |
| GAIF01031210.1 | 0      | 0.06   | 0      | 0      | 0.13   | 0      |
| GAIF01031211.1 | 0      | 0      | 0      | 0.3    | 0.93   | 0      |
| GAIF01031212.1 | 17.07  | 20.48  | 17.88  | 29.89  | 26.6   | 3.78   |
| GAIF01031213.1 | 26.08  | 28.45  | 14.03  | 28.94  | 15.99  | 2.62   |
| GAIF01031214.1 | 0.84   | 0.78   | 0      | 2.78   | 8.77   | 5.01   |
| GAIF01031217.1 | 7.17   | 17.15  | 14.61  | 20.47  | 13.62  | 3.47   |
| GAIF01031218.1 | 4.79   | 3.46   | 6.77   | 7.67   | 9.25   | 4.24   |
| GAIF01031219.1 | 0      | 0.16   | 0.16   | 0      | 0      | 0      |
| GAIF01031222.1 | 15.44  | 20.82  | 17.08  | 39.74  | 23.02  | 17.52  |
| GAIF01031223.1 | 17.96  | 9.32   | 19.42  | 50.02  | 43.06  | 189.44 |
| GAIF01031224.1 | 0      | 0      | 0      | 0.11   | 0.06   | 0      |
| GAIF01031225.1 | 0      | 0      | 0      | 0      | 0.09   | 0.02   |
| GAIF01031226.1 | 0      | 0      | 0      | 0      | 0.05   | 0      |
| GAIF01031227.1 | 0      | 0.06   | 0      | 0      | 0      | 0      |
| GAIF01031228.1 | 0.05   | 0.27   | 0.05   | 0      | 0.06   | 0.16   |
| GAIF01031229.1 | 3.54   | 2.91   | 1.18   | 4.97   | 12.37  | 0.71   |
| GAIF01031230.1 | 19.94  | 14.53  | 18.08  | 18.01  | 2.53   | 6.03   |
| GAIF01031232.1 | 0.3    | 0.16   | 0.83   | 2.63   | 6.17   | 15.3   |
| GAIF01031233.1 | 0      | 0      | 0      | 0.12   | 0      | 0      |
| GAIF01031234.1 | 0      | 0      | 0      | 0.28   | 0      | 0      |
| GAIF01031235.1 | 40     | 28.21  | 34.95  | 31.87  | 19.28  | 22.36  |
| GAIF01031237.1 | 0      | 0      | 0      | 0      | 3.29   | 0      |
| GAIF01031238.1 | 0      | 0.21   | 0.77   | 5.08   | 2.3    | 3.07   |
| GAIF01031239.1 | 56.53  | 74.93  | 55.23  | 145.11 | 132.36 | 37.07  |
| GAIF01031240.1 | 4.57   | 2.52   | 6.36   | 4.83   | 3.04   | 5.72   |
| GAIF01031241.1 | 180.85 | 225.78 | 259.39 | 548.91 | 303.15 | 33.91  |
| GAIF01031244.1 | 0.07   | 0.08   | 0      | 0      | 0      | 0      |
| GAIF01031245.1 | 14.04  | 6.56   | 7.02   | 17.29  | 8.8    | 11.48  |
| GAIF01031247.1 | 0      | 0      | 0      | 0      | 0.15   | 0      |
| GAIF01031248.1 | 0      | 0      | 0      | 0.38   | 0      | 0      |
| GAIF01031249.1 | 0.04   | 0      | 0      | 0.24   | 1.93   | 0      |
| GAIF01031251.1 | 0      | 0      | 0      | 0      | 0.07   | 0      |
| GAIF01031252.1 | 14.69  | 24.73  | 21.73  | 108.44 | 146.07 | 13.57  |
| GAIF01031255.1 | 0.06   | 0      | 0      | 0      | 0      | 0      |
| GAIF01031256.1 | 0.32   | 0      | 0.59   | 0.75   | 0.78   | 0.12   |
| GAIF01031257.1 | 4.31   | 3.56   | 2.45   | 19.51  | 18.61  | 1.97   |
| GAIF01031261.1 | 0.31   | 1.17   | 0      | 0.18   | 0.43   | 0      |

|                |        |        |        |        |        |        |
|----------------|--------|--------|--------|--------|--------|--------|
| GAIF01031262.1 | 13.05  | 30.82  | 16.43  | 8.15   | 5.67   | 0.3    |
| GAIF01031263.1 | 0      | 0.16   | 0.32   | 0.5    | 0.35   | 0.16   |
| GAIF01031265.1 | 0.02   | 0.05   | 0      | 0.63   | 1.9    | 0      |
| GAIF01031268.1 | 0.12   | 0.2    | 0      | 0      | 0      | 0      |
| GAIF01031269.1 | 0      | 0      | 0      | 0      | 0.08   | 0      |
| GAIF01031270.1 | 8.55   | 8.1    | 1.54   | 86.28  | 66.18  | 26.41  |
| GAIF01031274.1 | 559.84 | 395.93 | 384.81 | 304.52 | 260.76 | 279.63 |
| GAIF01031275.1 | 10.63  | 4.58   | 2.14   | 24.57  | 45.78  | 5.42   |
| GAIF01031276.1 | 0      | 0      | 0      | 0      | 11.75  | 0      |
| GAIF01031277.1 | 0      | 0      | 0      | 0.8    | 2.11   | 0      |
| GAIF01031279.1 | 19.79  | 19.05  | 17.91  | 15.51  | 7.72   | 5.66   |
| GAIF01031280.1 | 0.05   | 0.16   | 0.11   | 0.11   | 0.23   | 0.32   |
| GAIF01031282.1 | 1.82   | 0      | 1.66   | 3.81   | 0      | 0      |
| GAIF01031283.1 | 0.81   | 1.22   | 0.67   | 0      | 0.45   | 0      |
| GAIF01031284.1 | 0      | 0.07   | 0      | 0      | 0      | 0      |
| GAIF01031285.1 | 1.35   | 1.07   | 0.13   | 0.57   | 0.59   | 0      |
| GAIF01031286.1 | 0      | 0      | 0      | 0.15   | 0.11   | 0      |
| GAIF01031288.1 | 0      | 0      | 0      | 0.16   | 0.41   | 0      |
| GAIF01031289.1 | 18.78  | 7.11   | 3.07   | 120.76 | 237.26 | 3.74   |
| GAIF01031290.1 | 0.25   | 0.04   | 0      | 0.92   | 5.41   | 0.28   |
| GAIF01031291.1 | 0.84   | 0.7    | 0      | 2.58   | 1.88   | 0.99   |
| GAIF01031293.1 | 0.39   | 0.17   | 0.22   | 0.37   | 0      | 0      |
| GAIF01031294.1 | 125.54 | 108.16 | 66.25  | 194.46 | 206.14 | 159.98 |
| GAIF01031297.1 | 1.83   | 1.98   | 3.32   | 2.65   | 0.96   | 15.4   |
| GAIF01031298.1 | 0.06   | 0      | 0      | 0      | 0      | 0      |
| GAIF01031299.1 | 261.4  | 136.28 | 52.23  | 284.96 | 264.83 | 13.82  |
| GAIF01031301.1 | 2.42   | 3.91   | 2.34   | 1.64   | 1.05   | 1.91   |
| GAIF01031302.1 | 0.03   | 0.04   | 0.04   | 0.04   | 0      | 0.04   |
| GAIF01031303.1 | 1.87   | 1.16   | 0.78   | 5.07   | 5.36   | 0.59   |
| GAIF01031304.1 | 76.91  | 56.02  | 82.05  | 24.99  | 10.97  | 23.87  |
| GAIF01031305.1 | 0.18   | 0.1    | 0      | 2.94   | 8.23   | 0.1    |
| GAIF01031307.1 | 0.11   | 0.05   | 0.02   | 0.04   | 0.2    | 0      |
| GAIF01031308.1 | 32.95  | 18.96  | 21.5   | 39.46  | 22.36  | 75.13  |
| GAIF01031309.1 | 0      | 0.12   | 0      | 0      | 0.26   | 0      |
| GAIF01031311.1 | 0      | 0      | 0      | 1.44   | 3.64   | 4.81   |
| GAIF01031313.1 | 0      | 1.93   | 2.79   | 0      | 0      | 0.24   |
| GAIF01031315.1 | 0      | 0      | 0      | 0.34   | 0.32   | 0      |
| GAIF01031316.1 | 5.69   | 12.92  | 6.07   | 44.48  | 47.31  | 2.53   |
| GAIF01031317.1 | 0      | 0      | 0      | 0      | 0      | 0.23   |
| GAIF01031320.1 | 6.78   | 4.84   | 7.72   | 34.04  | 0      | 9.22   |
| GAIF01031321.1 | 0.77   | 0.29   | 0.04   | 0.4    | 1.02   | 0.81   |
| GAIF01031322.1 | 0.07   | 0      | 0      | 0.23   | 1.13   | 0.06   |
| GAIF01031323.1 | 324.47 | 394.01 | 400.36 | 478.93 | 367.78 | 253.55 |
| GAIF01031324.1 | 0      | 0      | 0      | 0      | 13.91  | 0      |

|                |       |        |        |        |       |        |
|----------------|-------|--------|--------|--------|-------|--------|
| GAIF01031327.1 | 0     | 0.11   | 0      | 0.34   | 0     | 0      |
| GAIF01031328.1 | 0     | 0.08   | 0      | 1.4    | 7.24  | 0.25   |
| GAIF01031330.1 | 1.92  | 0.92   | 1.88   | 6.65   | 6.43  | 6.83   |
| GAIF01031331.1 | 68.19 | 38.82  | 163.23 | 90.15  | 2.49  | 36.85  |
| GAIF01031333.1 | 6.7   | 6.81   | 3.35   | 24.95  | 11.41 | 1.39   |
| GAIF01031334.1 | 20.15 | 8.34   | 10.13  | 29.12  | 31.89 | 21.34  |
| GAIF01031335.1 | 36.4  | 17.12  | 17.34  | 50.18  | 22.4  | 50.51  |
| GAIF01031336.1 | 48.7  | 117.02 | 120.34 | 64.5   | 69.8  | 19.9   |
| GAIF01031337.1 | 1.75  | 0.47   | 0.82   | 5.45   | 12.04 | 0.59   |
| GAIF01031339.1 | 4.88  | 0.42   | 0.19   | 5.01   | 0.5   | 0.04   |
| GAIF01031340.1 | 0.43  | 0.1    | 0.16   | 1.12   | 1.63  | 0.16   |
| GAIF01031341.1 | 0.54  | 0.6    | 0.41   | 1.2    | 6.33  | 0      |
| GAIF01031342.1 | 0.1   | 0.02   | 0.03   | 0.58   | 2.52  | 0.05   |
| GAIF01031343.1 | 1.44  | 2.05   | 6.11   | 10     | 17.05 | 4.35   |
| GAIF01031344.1 | 0     | 0      | 0      | 0.28   | 0.14  | 0      |
| GAIF01031346.1 | 33.03 | 41.56  | 43.64  | 55.69  | 34.95 | 25.73  |
| GAIF01031348.1 | 0     | 0      | 0      | 0.44   | 0.1   | 0.09   |
| GAIF01031349.1 | 0.05  | 0      | 0.06   | 0      | 0     | 0      |
| GAIF01031350.1 | 4.35  | 3.9    | 0.81   | 9.24   | 7.24  | 1.73   |
| GAIF01031351.1 | 0     | 0      | 0.08   | 0      | 0.29  | 0      |
| GAIF01031352.1 | 0     | 0.14   | 0      | 0.15   | 0     | 0      |
| GAIF01031353.1 | 77.23 | 44.27  | 38.94  | 107.26 | 49.68 | 146.88 |
| GAIF01031354.1 | 15.26 | 8.34   | 13.27  | 14.39  | 9.32  | 11.31  |
| GAIF01031355.1 | 15.28 | 14.2   | 6.4    | 20.39  | 22.02 | 2.03   |
| GAIF01031356.1 | 0.36  | 0      | 0      | 0.41   | 0     | 0.2    |
| GAIF01031357.1 | 0.31  | 0.47   | 0.74   | 1.35   | 1.62  | 0.27   |
| GAIF01031358.1 | 0.04  | 0.05   | 0      | 0      | 0     | 0      |
| GAIF01031359.1 | 2.22  | 0.26   | 0      | 11.02  | 35.63 | 0.8    |
| GAIF01031360.1 | 88.68 | 86.99  | 74.41  | 5.56   | 3.11  | 9.02   |
| GAIF01031361.1 | 0.24  | 0.44   | 0.71   | 0.75   | 1.07  | 0.27   |
| GAIF01031363.1 | 0     | 0.07   | 0      | 0.22   | 0.15  | 0      |
| GAIF01031364.1 | 0.16  | 0      | 0      | 0.19   | 0     | 0.19   |
| GAIF01031365.1 | 2.85  | 1.17   | 0.59   | 3.53   | 15.63 | 5.84   |
| GAIF01031367.1 | 7.18  | 9.07   | 11.95  | 6.66   | 3.76  | 4.21   |
| GAIF01031368.1 | 17.64 | 20.03  | 39.96  | 55.73  | 36.5  | 79.7   |
| GAIF01031369.1 | 0.7   | 0.77   | 0.65   | 0.57   | 1.29  | 0.12   |
| GAIF01031370.1 | 0.59  | 0.85   | 0      | 0.68   | 0.47  | 0      |
| GAIF01031371.1 | 1.84  | 2.61   | 1.93   | 3      | 5.35  | 0      |
| GAIF01031372.1 | 0     | 0.19   | 0      | 0      | 0.49  | 0      |
| GAIF01031373.1 | 0     | 0      | 0      | 0.16   | 0.36  | 0      |
| GAIF01031375.1 | 0     | 0      | 0      | 0.19   | 0.82  | 0      |
| GAIF01031376.1 | 0.24  | 0.48   | 0.17   | 0.74   | 0.26  | 0.26   |
| GAIF01031377.1 | 0.85  | 0      | 0      | 0      | 0     | 0      |
| GAIF01031379.1 | 6.67  | 3.32   | 5.15   | 2.81   | 0.94  | 6.94   |

|                |        |        |        |       |       |        |
|----------------|--------|--------|--------|-------|-------|--------|
| GAIF01031380.1 | 0      | 0      | 0      | 0     | 0.02  | 0      |
| GAIF01031381.1 | 0      | 0      | 0      | 0.32  | 0.32  | 0      |
| GAIF01031383.1 | 0      | 0      | 0      | 1.85  | 7.65  | 0      |
| GAIF01031386.1 | 0.12   | 0      | 0.13   | 0     | 0.15  | 0      |
| GAIF01031387.1 | 8.93   | 12.57  | 8.24   | 8.48  | 4.39  | 1.12   |
| GAIF01031389.1 | 0      | 0.32   | 0      | 0     | 0     | 0      |
| GAIF01031391.1 | 10.5   | 13.19  | 9.1    | 38.98 | 16.01 | 3.75   |
| GAIF01031392.1 | 4.98   | 2.17   | 1.23   | 6.11  | 6.48  | 3.91   |
| GAIF01031394.1 | 0      | 0      | 0      | 0     | 0.12  | 0      |
| GAIF01031397.1 | 0.11   | 0      | 0.24   | 0     | 0.19  | 0      |
| GAIF01031399.1 | 18.55  | 60.49  | 7.22   | 52.61 | 96.76 | 1.51   |
| GAIF01031400.1 | 0      | 0      | 0      | 0.2   | 0     | 0      |
| GAIF01031404.1 | 0.09   | 0      | 0      | 0.21  | 1.74  | 0      |
| GAIF01031405.1 | 9.91   | 5.79   | 12.11  | 16.37 | 10.86 | 8.84   |
| GAIF01031406.1 | 5.73   | 10.85  | 7.52   | 17.52 | 11.06 | 2.68   |
| GAIF01031407.1 | 0      | 0      | 0      | 0     | 0.08  | 0      |
| GAIF01031409.1 | 0.72   | 0.61   | 0.18   | 2.9   | 6.4   | 0.22   |
| GAIF01031410.1 | 0      | 0      | 0.08   | 0.15  | 0.35  | 0      |
| GAIF01031413.1 | 11.3   | 10.08  | 7.09   | 20.21 | 23.25 | 2.29   |
| GAIF01031414.1 | 0      | 0.98   | 1.13   | 0     | 0     | 0      |
| GAIF01031415.1 | 18.8   | 14.55  | 8.94   | 36.61 | 25.6  | 2.77   |
| GAIF01031416.1 | 10.98  | 21.95  | 19.77  | 39.32 | 21.38 | 6.53   |
| GAIF01031417.1 | 0.24   | 0      | 0      | 0.28  | 1.53  | 0.16   |
| GAIF01031418.1 | 0      | 0      | 0.15   | 0     | 0     | 0      |
| GAIF01031419.1 | 5.41   | 7.97   | 5.64   | 38.47 | 25.45 | 3.07   |
| GAIF01031420.1 | 17.77  | 9.6    | 7.35   | 2.79  | 2.43  | 1.05   |
| GAIF01031423.1 | 0      | 0      | 0      | 0     | 2.03  | 0      |
| GAIF01031424.1 | 1.87   | 2.05   | 2.28   | 2.46  | 1.59  | 1.04   |
| GAIF01031425.1 | 0.06   | 0      | 0      | 0.07  | 0.07  | 0      |
| GAIF01031427.1 | 0      | 0.3    | 0.3    | 0     | 0     | 0      |
| GAIF01031428.1 | 0      | 0      | 0      | 0.91  | 1.22  | 0      |
| GAIF01031429.1 | 0.14   | 0      | 0      | 0.08  | 0.08  | 0      |
| GAIF01031430.1 | 0      | 0      | 0      | 0.04  | 0     | 0      |
| GAIF01031434.1 | 0.15   | 0.05   | 0      | 0.29  | 0.3   | 0      |
| GAIF01031435.1 | 384.34 | 224.38 | 219.05 | 40.71 | 39.31 | 302.11 |
| GAIF01031436.1 | 43.6   | 73.8   | 31.78  | 13.59 | 23.58 | 7.5    |
| GAIF01031437.1 | 7.52   | 4.8    | 3.05   | 17.65 | 29.79 | 3.96   |
| GAIF01031438.1 | 0.07   | 0      | 0.04   | 1.14  | 5.06  | 0.54   |
| GAIF01031440.1 | 0      | 0      | 0      | 0.51  | 0.26  | 0      |
| GAIF01031441.1 | 0      | 0      | 0.14   | 0.16  | 0.24  | 0      |
| GAIF01031443.1 | 0      | 0      | 0      | 0.26  | 0     | 0      |
| GAIF01031444.1 | 5.86   | 1.75   | 2.41   | 0.57  | 0     | 0.51   |
| GAIF01031445.1 | 0.77   | 0.99   | 1.03   | 0     | 0.28  | 0.37   |
| GAIF01031446.1 | 0.4    | 0.16   | 0.13   | 1.92  | 7.54  | 0.14   |



|                |        |        |        |         |        |         |
|----------------|--------|--------|--------|---------|--------|---------|
| GAIF01031447.1 | 0      | 0      | 0      | 0       | 0.79   | 0       |
| GAIF01031448.1 | 0.67   | 0.62   | 0.28   | 1.19    | 3.46   | 0.06    |
| GAIF01031450.1 | 2.82   | 18.47  | 2.89   | 0.5     | 4.16   | 0.44    |
| GAIF01031451.1 | 1.67   | 0.61   | 0      | 6.21    | 35.66  | 3.07    |
| GAIF01031452.1 | 0.04   | 0      | 0.03   | 0.07    | 0.06   | 0       |
| GAIF01031453.1 | 30.83  | 20.77  | 19.21  | 73      | 55.24  | 16.38   |
| GAIF01031454.1 | 209.89 | 270.91 | 744.64 | 0       | 2.57   | 101.79  |
| GAIF01031457.1 | 0.18   | 0      | 0      | 0       | 0      | 0       |
| GAIF01031458.1 | 0.19   | 0      | 0.1    | 0.11    | 0      | 0       |
| GAIF01031460.1 | 16.48  | 8.24   | 7.44   | 27.92   | 32.75  | 22.95   |
| GAIF01031461.1 | 0      | 0      | 0.06   | 0.3     | 1.57   | 0       |
| GAIF01031462.1 | 216.22 | 207.05 | 114.48 | 466.43  | 420.37 | 62.02   |
| GAIF01031464.1 | 0      | 0.34   | 0.11   | 0       | 0      | 0.06    |
| GAIF01031465.1 | 91.17  | 36.37  | 49.32  | 122.39  | 69.34  | 372.25  |
| GAIF01031467.1 | 39.48  | 129.61 | 88.88  | 63.48   | 26.09  | 56.49   |
| GAIF01031468.1 | 0      | 0.27   | 0      | 0.57    | 0.3    | 0       |
| GAIF01031469.1 | 0.19   | 0      | 0      | 0.86    | 5.05   | 0.49    |
| GAIF01031470.1 | 245.39 | 273.16 | 126.01 | 476.46  | 221.65 | 44.48   |
| GAIF01031472.1 | 0.11   | 0.12   | 0.12   | 1.04    | 4.44   | 0       |
| GAIF01031474.1 | 53.08  | 41.51  | 46.42  | 14.11   | 14.5   | 20.39   |
| GAIF01031475.1 | 0      | 0      | 0      | 0       | 0.13   | 0       |
| GAIF01031476.1 | 68.79  | 78.67  | 152.99 | 30.75   | 22.79  | 54.62   |
| GAIF01031477.1 | 38.79  | 27.98  | 25.27  | 156.1   | 172.41 | 28.08   |
| GAIF01031478.1 | 65.93  | 34.12  | 25.4   | 164.39  | 161.29 | 28.93   |
| GAIF01031479.1 | 0      | 0      | 0      | 0       | 0.18   | 0       |
| GAIF01031481.1 | 1610.4 | 451.33 | 650.06 | 1553.83 | 873.71 | 21116.1 |
| GAIF01031483.1 | 0      | 0      | 0      | 0       | 0.1    | 0       |
| GAIF01031484.1 | 26.85  | 31.08  | 17.14  | 37.51   | 31.2   | 9.3     |
| GAIF01031485.1 | 26.35  | 45.19  | 53.78  | 67.97   | 40.62  | 20.66   |
| GAIF01031486.1 | 0.03   | 0      | 0      | 0.12    | 0.24   | 0.29    |
| GAIF01031487.1 | 0      | 0      | 0      | 0.02    | 0.09   | 0       |
| GAIF01031488.1 | 2.08   | 0.76   | 0      | 0       | 0      | 0       |
| GAIF01031490.1 | 15.84  | 1.56   | 0.2    | 1.58    | 7.93   | 0.59    |
| GAIF01031491.1 | 7.57   | 2.71   | 2.17   | 9.42    | 15.36  | 8.1     |
| GAIF01031492.1 | 0      | 0      | 0      | 0.07    | 0.56   | 0       |
| GAIF01031493.1 | 1.32   | 0.34   | 0.32   | 3.49    | 24.46  | 0.82    |
| GAIF01031494.1 | 5.37   | 2.58   | 1.06   | 6.48    | 9.13   | 0.87    |
| GAIF01031495.1 | 0      | 0      | 0.13   | 0       | 0      | 0       |
| GAIF01031496.1 | 4.89   | 10.96  | 7.53   | 5.43    | 4.13   | 0.46    |
| GAIF01031497.1 | 0.54   | 0      | 0      | 0       | 1.3    | 1.19    |
| GAIF01031503.1 | 7.57   | 3.43   | 5.68   | 2.34    | 0.91   | 1.11    |
| GAIF01031504.1 | 0.72   | 1.42   | 1.08   | 5.13    | 7.14   | 0.63    |
| GAIF01031505.1 | 3.49   | 1.11   | 2.31   | 5.68    | 10.78  | 21.25   |
| GAIF01031506.1 | 0      | 0      | 0      | 0       | 0      | 0.51    |

|                |        |       |        |        |        |       |
|----------------|--------|-------|--------|--------|--------|-------|
| GAIF01031507.1 | 2.99   | 3.17  | 3.02   | 1.55   | 1.23   | 0.26  |
| GAIF01031508.1 | 0.79   | 0.29  | 0      | 0.75   | 1.31   | 0.15  |
| GAIF01031509.1 | 10.8   | 3.46  | 3.02   | 7.26   | 5.25   | 1.54  |
| GAIF01031510.1 | 1.01   | 1.22  | 2.35   | 1.3    | 1.49   | 1.73  |
| GAIF01031511.1 | 45     | 69.31 | 30.58  | 7.82   | 4.57   | 1.02  |
| GAIF01031513.1 | 0.03   | 0.03  | 0.03   | 0.36   | 2.27   | 0.21  |
| GAIF01031517.1 | 0.04   | 0     | 0      | 0.09   | 0      | 0.04  |
| GAIF01031518.1 | 0      | 0.13  | 0      | 0      | 0      | 0     |
| GAIF01031519.1 | 0.03   | 0.01  | 0      | 0.02   | 0.03   | 0     |
| GAIF01031521.1 | 0      | 0.3   | 0      | 0      | 0      | 0     |
| GAIF01031522.1 | 0      | 0     | 0      | 0.27   | 1.46   | 0.05  |
| GAIF01031523.1 | 171.25 | 246.5 | 180.18 | 299.55 | 236.33 | 68.31 |
| GAIF01031526.1 | 0      | 0.21  | 0      | 0      | 0      | 0     |
| GAIF01031527.1 | 0      | 0     | 0.17   | 0      | 0      | 0     |
| GAIF01031529.1 | 0      | 0     | 0      | 0.46   | 0.95   | 0     |
| GAIF01031530.1 | 16.43  | 17.14 | 19.76  | 36.09  | 30.07  | 4.73  |
| GAIF01031531.1 | 10.61  | 3.15  | 0.28   | 67.63  | 201.74 | 1.84  |
| GAIF01031532.1 | 0.06   | 0     | 0.04   | 0      | 0      | 0     |
| GAIF01031534.1 | 15.83  | 16.33 | 19.03  | 16.88  | 26.93  | 11.58 |
| GAIF01031535.1 | 0      | 2.55  | 0.66   | 0      | 0      | 0.12  |
| GAIF01031536.1 | 0      | 0     | 0      | 0      | 0      | 2.3   |
| GAIF01031538.1 | 0.03   | 0.04  | 0.23   | 0.12   | 0.04   | 0.08  |
| GAIF01031539.1 | 0.12   | 0.03  | 0      | 0.54   | 2.18   | 0.07  |
| GAIF01031540.1 | 0      | 0     | 0      | 0.2    | 0      | 0     |
| GAIF01031541.1 | 17.65  | 4.63  | 9.74   | 28.11  | 21.68  | 2.49  |
| GAIF01031543.1 | 75.73  | 34.27 | 16.86  | 79.06  | 83.65  | 29.62 |
| GAIF01031544.1 | 0      | 0.13  | 0      | 0      | 1.04   | 0     |
| GAIF01031545.1 | 2.91   | 3.03  | 3.2    | 7.78   | 3.96   | 1.26  |
| GAIF01031546.1 | 33.74  | 0     | 1.8    | 19.57  | 7.36   | 34.51 |
| GAIF01031547.1 | 0.08   | 0.07  | 0      | 0      | 0.01   | 0     |
| GAIF01031548.1 | 0.08   | 0     | 0      | 0      | 0      | 0     |
| GAIF01031550.1 | 37.74  | 24.21 | 16.3   | 35.96  | 2.23   | 2.94  |
| GAIF01031551.1 | 3.67   | 2.39  | 1.96   | 7.27   | 8.94   | 1.91  |
| GAIF01031552.1 | 7.29   | 4.47  | 8.97   | 17.2   | 10.32  | 11.32 |
| GAIF01031553.1 | 0      | 0.16  | 0      | 0.6    | 0.03   | 0.08  |
| GAIF01031554.1 | 0      | 0     | 0      | 0      | 0.16   | 0     |
| GAIF01031556.1 | 0      | 0     | 0      | 0      | 0.08   | 0     |
| GAIF01031558.1 | 0.09   | 0     | 0      | 0.69   | 5.98   | 0.15  |
| GAIF01031560.1 | 0.09   | 0     | 0      | 0.76   | 3.2    | 0     |
| GAIF01031562.1 | 0      | 0.76  | 0      | 0.32   | 0      | 0     |
| GAIF01031563.1 | 0      | 0     | 0      | 0      | 0.21   | 0     |
| GAIF01031566.1 | 0.11   | 0     | 0      | 0.25   | 2.72   | 0.12  |
| GAIF01031568.1 | 0      | 0.74  | 0      | 0      | 0      | 0     |
| GAIF01031569.1 | 0      | 0     | 0      | 0      | 0.1    | 0     |

|                |         |         |        |         |         |         |
|----------------|---------|---------|--------|---------|---------|---------|
| GAIF01031570.1 | 0.19    | 0.07    | 0.17   | 0.15    | 0       | 0.12    |
| GAIF01031571.1 | 2.39    | 0.69    | 3.15   | 0       | 0       | 0       |
| GAIF01031572.1 | 5.07    | 4.18    | 0.81   | 10.65   | 16.98   | 15.82   |
| GAIF01031574.1 | 5.41    | 0.43    | 0.09   | 16.98   | 45.91   | 15.36   |
| GAIF01031575.1 | 1.36    | 1.26    | 1.71   | 3.44    | 5.08    | 1.44    |
| GAIF01031576.1 | 0       | 0       | 0.04   | 0       | 0       | 0       |
| GAIF01031577.1 | 0.12    | 0       | 0.16   | 1.1     | 2.77    | 0.39    |
| GAIF01031579.1 | 1.17    | 1.32    | 0.99   | 5.55    | 6.6     | 0.38    |
| GAIF01031580.1 | 0       | 0       | 0.42   | 0       | 0       | 0       |
| GAIF01031582.1 | 0.19    | 0       | 0      | 0.49    | 0.66    | 0       |
| GAIF01031583.1 | 7.09    | 9.3     | 3.57   | 0       | 0       | 0.25    |
| GAIF01031584.1 | 0       | 0       | 0      | 0       | 0.2     | 0       |
| GAIF01031586.1 | 0.38    | 0.4     | 0.03   | 1.68    | 4.21    | 0       |
| GAIF01031589.1 | 1.57    | 0.86    | 0.38   | 0.2     | 0.42    | 0.1     |
| GAIF01031592.1 | 0.13    | 0       | 0      | 0.16    | 0.97    | 0       |
| GAIF01031593.1 | 34.67   | 40.39   | 29.51  | 36.95   | 42.09   | 66.84   |
| GAIF01031594.1 | 0.06    | 0       | 0      | 0       | 0.18    | 0.12    |
| GAIF01031596.1 | 1.56    | 0.37    | 0.72   | 11.21   | 16.85   | 1.26    |
| GAIF01031598.1 | 21.85   | 29.92   | 28.37  | 65.84   | 58.57   | 15.14   |
| GAIF01031599.1 | 0       | 0       | 0.14   | 0       | 0       | 0.61    |
| GAIF01031601.1 | 21.92   | 19.72   | 27.34  | 18.95   | 19.11   | 35.98   |
| GAIF01031602.1 | 3.62    | 0.74    | 0.29   | 38.51   | 164.49  | 16.44   |
| GAIF01031603.1 | 20.76   | 14.58   | 13.71  | 21.23   | 19.84   | 15.12   |
| GAIF01031604.1 | 2.67    | 2.36    | 0.85   | 1.38    | 1.43    | 0.15    |
| GAIF01031605.1 | 0       | 14.91   | 6.6    | 0       | 0.39    | 0       |
| GAIF01031606.1 | 22.89   | 14.21   | 20.02  | 37.82   | 40.26   | 20.66   |
| GAIF01031607.1 | 0.92    | 0.6     | 1.05   | 0.14    | 0.3     | 0.1     |
| GAIF01031608.1 | 0.31    | 0       | 0.11   | 0.6     | 1.24    | 0       |
| GAIF01031609.1 | 0.4     | 0.73    | 0.22   | 1.48    | 1.77    | 0       |
| GAIF01031611.1 | 0.09    | 0.07    | 0.2    | 0.86    | 3       | 0.37    |
| GAIF01031613.1 | 1326.04 | 1166.66 | 828.16 | 1889.77 | 1729.78 | 2125.71 |
| GAIF01031614.1 | 0.03    | 0.04    | 0      | 0.16    | 0.16    | 0       |
| GAIF01031615.1 | 0       | 0.21    | 0      | 0       | 0       | 0       |
| GAIF01031616.1 | 0.11    | 0.16    | 0.25   | 0.82    | 4.1     | 0.16    |
| GAIF01031617.1 | 4.26    | 2.12    | 0      | 8.42    | 13.42   | 0       |
| GAIF01031618.1 | 87.2    | 60.63   | 73.23  | 95.28   | 39.15   | 18.28   |
| GAIF01031620.1 | 8.77    | 6.42    | 6.93   | 11.53   | 18.66   | 4.34    |
| GAIF01031625.1 | 0       | 0       | 0      | 0       | 0       | 0.15    |
| GAIF01031628.1 | 0       | 0       | 0      | 0       | 0.86    | 0       |
| GAIF01031629.1 | 187.18  | 184.75  | 99.06  | 265.91  | 223.4   | 59.08   |
| GAIF01031630.1 | 0.28    | 0       | 0      | 0       | 0       | 0       |
| GAIF01031631.1 | 1.13    | 0.68    | 0.44   | 0.39    | 1.23    | 0.06    |
| GAIF01031632.1 | 0       | 0       | 0      | 0       | 0       | 0.04    |
| GAIF01031634.1 | 0       | 0       | 0      | 0       | 0.17    | 0       |

|                |         |        |        |        |         |        |
|----------------|---------|--------|--------|--------|---------|--------|
| GAIF01031635.1 | 112.44  | 111.17 | 81.47  | 179.12 | 71.59   | 46.85  |
| GAIF01031637.1 | 0       | 0      | 0      | 0.19   | 0       | 0      |
| GAIF01031638.1 | 0       | 0.62   | 0.16   | 11.66  | 55.5    | 0.31   |
| GAIF01031639.1 | 5.35    | 3.25   | 1.62   | 7.72   | 3.85    | 0.82   |
| GAIF01031640.1 | 1.06    | 0.96   | 0.39   | 1.84   | 1.69    | 4.86   |
| GAIF01031641.1 | 3.39    | 8.7    | 11.8   | 1.17   | 1.68    | 1.01   |
| GAIF01031642.1 | 99      | 56.52  | 69.11  | 31.36  | 14.86   | 37.14  |
| GAIF01031644.1 | 3.66    | 3.84   | 1.47   | 1.61   | 0.59    | 0.1    |
| GAIF01031646.1 | 0.13    | 0.13   | 0.02   | 0      | 0       | 0.05   |
| GAIF01031647.1 | 0       | 0      | 0      | 0      | 0.1     | 0      |
| GAIF01031651.1 | 7.2     | 21.79  | 24.64  | 30.98  | 35.63   | 19.16  |
| GAIF01031652.1 | 0.16    | 0.02   | 0.11   | 0      | 0       | 0.02   |
| GAIF01031653.1 | 12.55   | 11.68  | 4.44   | 70.51  | 75.53   | 2.77   |
| GAIF01031655.1 | 0       | 0.12   | 0.26   | 0.27   | 0.13    | 0      |
| GAIF01031656.1 | 0.03    | 0      | 0      | 0      | 0       | 0      |
| GAIF01031658.1 | 0.52    | 2.04   | 1.74   | 2.62   | 1.9     | 1.17   |
| GAIF01031660.1 | 1.85    | 0      | 0      | 0      | 2.49    | 6.95   |
| GAIF01031661.1 | 0.29    | 0      | 0      | 0.19   | 0.36    | 0      |
| GAIF01031663.1 | 15.65   | 13.12  | 6.61   | 95.35  | 62.1    | 7.61   |
| GAIF01031664.1 | 4.8     | 3.6    | 4.45   | 0.8    | 0.38    | 0.14   |
| GAIF01031665.1 | 0       | 0.31   | 0      | 0.06   | 0.06    | 0      |
| GAIF01031668.1 | 1.51    | 0.82   | 0.09   | 3.46   | 10.55   | 0.28   |
| GAIF01031669.1 | 7.66    | 7.91   | 5.75   | 41.87  | 63.35   | 4.37   |
| GAIF01031671.1 | 0.61    | 0.36   | 0.25   | 7.43   | 22.08   | 0.98   |
| GAIF01031672.1 | 4.38    | 9.94   | 3.77   | 11.81  | 15.03   | 0.24   |
| GAIF01031673.1 | 0       | 0      | 0      | 0      | 0.08    | 0      |
| GAIF01031674.1 | 12.01   | 3.82   | 9.42   | 8.14   | 12.56   | 22.93  |
| GAIF01031675.1 | 0.83    | 0      | 0      | 0.6    | 9.08    | 0.1    |
| GAIF01031676.1 | 0.57    | 0.05   | 0      | 0.77   | 2       | 0      |
| GAIF01031677.1 | 172.69  | 46.75  | 40.23  | 19.64  | 16.16   | 9.24   |
| GAIF01031678.1 | 0.45    | 0.13   | 0      | 1.13   | 0.98    | 0      |
| GAIF01031679.1 | 3.88    | 1.36   | 0      | 2.29   | 8.26    | 2.11   |
| GAIF01031680.1 | 0.13    | 0.14   | 0      | 1.9    | 7.58    | 0.2    |
| GAIF01031681.1 | 1140.81 | 280.78 | 369.63 | 794.39 | 1482.31 | 3320.1 |
| GAIF01031682.1 | 0.34    | 0.19   | 0.09   | 1.18   | 2.73    | 0      |
| GAIF01031683.1 | 0.96    | 0      | 0      | 0.1    | 0       | 0      |
| GAIF01031684.1 | 0       | 0      | 0      | 0.15   | 0.03    | 0.05   |
| GAIF01031686.1 | 0       | 0      | 0      | 0      | 1.08    | 0      |
| GAIF01031688.1 | 7.74    | 0.47   | 0.05   | 0.93   | 3.56    | 0.33   |
| GAIF01031689.1 | 38.3    | 31.93  | 53.19  | 31.1   | 36.47   | 27.97  |
| GAIF01031690.1 | 0       | 0      | 0      | 0.23   | 0.57    | 0      |
| GAIF01031691.1 | 0       | 0      | 0      | 0      | 0.3     | 0      |
| GAIF01031692.1 | 0.11    | 0.24   | 0      | 0      | 0       | 0      |
| GAIF01031693.1 | 0.12    | 0.04   | 0      | 0.95   | 4.61    | 0      |

|                |        |        |        |        |        |        |
|----------------|--------|--------|--------|--------|--------|--------|
| GAIF01031695.1 | 0.65   | 0.2    | 0.1    | 4.82   | 14.96  | 0.57   |
| GAIF01031696.1 | 0      | 0      | 0      | 0.26   | 0      | 0      |
| GAIF01031697.1 | 1.17   | 1.01   | 0.57   | 4.22   | 5.62   | 0.3    |
| GAIF01031699.1 | 9.07   | 4.04   | 0.68   | 17.76  | 72.5   | 9.48   |
| GAIF01031700.1 | 4.12   | 2.17   | 1.73   | 3.01   | 1.78   | 7.4    |
| GAIF01031701.1 | 20.04  | 7.92   | 9.98   | 22.35  | 37.45  | 38.36  |
| GAIF01031705.1 | 11.13  | 3.27   | 2.88   | 0      | 0      | 0      |
| GAIF01031707.1 | 5.3    | 2.88   | 5.9    | 5.98   | 3.63   | 2.51   |
| GAIF01031708.1 | 0.02   | 0      | 0      | 0.28   | 1      | 0.05   |
| GAIF01031709.1 | 1.27   | 1.9    | 0.52   | 3.68   | 2.1    | 1.57   |
| GAIF01031710.1 | 0      | 0      | 0      | 0      | 0.14   | 0      |
| GAIF01031711.1 | 117.35 | 103.43 | 114    | 128.97 | 54.03  | 36.42  |
| GAIF01031712.1 | 0.34   | 0.11   | 0      | 0      | 0      | 0      |
| GAIF01031713.1 | 0.26   | 1.68   | 0.99   | 2.24   | 1.86   | 0.14   |
| GAIF01031715.1 | 1.33   | 1.13   | 1.96   | 3.2    | 5.74   | 0.07   |
| GAIF01031716.1 | 185.75 | 176.95 | 101.76 | 110.19 | 101.38 | 117.02 |
| GAIF01031717.1 | 10.04  | 15.3   | 12.27  | 11.4   | 6.5    | 1.66   |
| GAIF01031718.1 | 0.11   | 0.78   | 0      | 0.13   | 0.54   | 0.09   |
| GAIF01031722.1 | 0      | 0      | 0      | 0      | 0.15   | 0.04   |
| GAIF01031725.1 | 3.78   | 2.06   | 6.11   | 6.09   | 2.15   | 14.81  |
| GAIF01031728.1 | 0      | 0      | 0      | 2.76   | 15.23  | 0      |
| GAIF01031729.1 | 30.29  | 29.76  | 27.84  | 36.98  | 25.9   | 16.81  |
| GAIF01031731.1 | 23.4   | 5.49   | 1.92   | 19.87  | 30.67  | 37.74  |
| GAIF01031732.1 | 2.65   | 1.39   | 1.87   | 6.3    | 4.67   | 2.51   |
| GAIF01031733.1 | 39.47  | 19.01  | 13.05  | 42.72  | 50.04  | 22.14  |
| GAIF01031734.1 | 0.23   | 0.5    | 0      | 0.26   | 1.35   | 0.38   |
| GAIF01031736.1 | 3.62   | 2.89   | 1.4    | 35.14  | 30.7   | 1.28   |
| GAIF01031738.1 | 0.09   | 0      | 0      | 0.42   | 0.43   | 0.39   |
| GAIF01031741.1 | 0      | 0      | 0      | 0      | 0.05   | 0      |
| GAIF01031743.1 | 0      | 0.06   | 0      | 0.73   | 1.26   | 0      |
| GAIF01031745.1 | 5.02   | 1.99   | 3.89   | 17.42  | 3.37   | 9.96   |
| GAIF01031746.1 | 0.08   | 0.09   | 0      | 0.48   | 1.24   | 0      |
| GAIF01031747.1 | 0      | 0.11   | 0      | 0.58   | 1.79   | 0      |
| GAIF01031748.1 | 1.19   | 0      | 0      | 3.46   | 7.88   | 0.66   |
| GAIF01031749.1 | 0.13   | 0.26   | 0.19   | 0.45   | 0.08   | 0.25   |
| GAIF01031750.1 | 0.1    | 0      | 0      | 0      | 0      | 0      |
| GAIF01031751.1 | 0      | 0.14   | 0      | 0      | 0.7    | 0      |
| GAIF01031752.1 | 0      | 0      | 0.21   | 0      | 0      | 0      |
| GAIF01031753.1 | 0.03   | 0      | 0      | 0.12   | 0.53   | 0.03   |
| GAIF01031755.1 | 0.83   | 0.2    | 0.2    | 3.31   | 9.62   | 0      |
| GAIF01031756.1 | 0.2    | 0.05   | 0.08   | 4.79   | 15.12  | 0.8    |
| GAIF01031757.1 | 0      | 0      | 0      | 0.2    | 0.12   | 0      |
| GAIF01031760.1 | 6.22   | 1.07   | 10.53  | 0      | 15.46  | 0      |
| GAIF01031761.1 | 5.82   | 0.76   | 0.51   | 0.54   | 3.22   | 6.61   |

|                |        |        |        |        |        |        |
|----------------|--------|--------|--------|--------|--------|--------|
| GAIF01031762.1 | 0.97   | 0.35   | 0.18   | 0.38   | 0      | 0      |
| GAIF01031763.1 | 1.03   | 0.64   | 0      | 3.06   | 6.53   | 0.16   |
| GAIF01031764.1 | 0      | 0      | 0      | 0.3    | 1.43   | 0      |
| GAIF01031766.1 | 0.06   | 0      | 0.13   | 0.07   | 0.21   | 0      |
| GAIF01031767.1 | 1.89   | 2.53   | 0.49   | 5.02   | 6.67   | 0.12   |
| GAIF01031768.1 | 0.05   | 0.06   | 0      | 0.19   | 0.91   | 0.06   |
| GAIF01031769.1 | 17.7   | 16.87  | 9.02   | 35.47  | 52.36  | 12.77  |
| GAIF01031770.1 | 8.77   | 5.15   | 9.24   | 35.49  | 19.39  | 13.32  |
| GAIF01031771.1 | 0      | 0      | 0      | 0.06   | 0.38   | 0      |
| GAIF01031772.1 | 0.08   | 0.28   | 0.28   | 0.49   | 1.12   | 0      |
| GAIF01031773.1 | 19.65  | 19.78  | 30     | 57.16  | 80.01  | 27.49  |
| GAIF01031774.1 | 0      | 16.61  | 2.3    | 0      | 0.18   | 0.83   |
| GAIF01031775.1 | 16.66  | 16.49  | 10.64  | 4.05   | 2.68   | 0.5    |
| GAIF01031776.1 | 3.05   | 3.3    | 8.5    | 4.71   | 0.13   | 4.47   |
| GAIF01031777.1 | 0      | 0      | 0      | 0      | 0.03   | 0      |
| GAIF01031779.1 | 0      | 0      | 0.12   | 0      | 0      | 0      |
| GAIF01031782.1 | 0      | 5.98   | 3.18   | 0      | 0      | 0.8    |
| GAIF01031783.1 | 0      | 0.1    | 0.05   | 0      | 0.11   | 0      |
| GAIF01031784.1 | 1.92   | 2.51   | 2.66   | 1.07   | 0.8    | 0.86   |
| GAIF01031785.1 | 0      | 0      | 0.99   | 0      | 0.51   | 1.33   |
| GAIF01031787.1 | 2.6    | 0.47   | 0      | 21.23  | 111.57 | 1.31   |
| GAIF01031788.1 | 0.15   | 0      | 0      | 1.06   | 7.3    | 0.5    |
| GAIF01031790.1 | 12.89  | 22.53  | 16.3   | 22.91  | 14.52  | 7.37   |
| GAIF01031792.1 | 365.33 | 438.15 | 635.27 | 580.85 | 408.36 | 278.88 |
| GAIF01031793.1 | 16.43  | 31.57  | 16.38  | 19.26  | 13.43  | 2.02   |
| GAIF01031794.1 | 3.82   | 6.47   | 10.42  | 5.02   | 3.67   | 5.54   |
| GAIF01031795.1 | 76.77  | 144.9  | 136.35 | 179.38 | 183.32 | 40.13  |
| GAIF01031799.1 | 1      | 0.72   | 0.35   | 1.89   | 2.2    | 0.26   |
| GAIF01031800.1 | 2.53   | 1.61   | 0.36   | 6.48   | 16.46  | 5.33   |
| GAIF01031801.1 | 0      | 0.29   | 0.2    | 0.35   | 1.82   | 0      |
| GAIF01031802.1 | 0.15   | 0      | 0      | 0      | 0      | 0      |
| GAIF01031803.1 | 0.03   | 0      | 0.09   | 0.03   | 0.03   | 0      |
| GAIF01031805.1 | 16.83  | 11.7   | 20.71  | 38.06  | 22.14  | 17.08  |
| GAIF01031807.1 | 0      | 0.91   | 2.62   | 0      | 0      | 0.17   |
| GAIF01031808.1 | 0      | 0.17   | 0      | 0      | 0.19   | 0      |
| GAIF01031809.1 | 3.08   | 0      | 10.5   | 15.04  | 0      | 3.78   |
| GAIF01031810.1 | 0      | 0.28   | 0      | 0.24   | 0.08   | 0.07   |
| GAIF01031812.1 | 1.23   | 1.47   | 1.77   | 2.1    | 2.39   | 0.49   |
| GAIF01031813.1 | 0.48   | 0      | 0.17   | 0.74   | 3.05   | 0      |
| GAIF01031814.1 | 27.78  | 11.04  | 4.44   | 50.55  | 66.26  | 21.95  |
| GAIF01031815.1 | 0.24   | 0.13   | 0      | 1.1    | 2.68   | 0      |
| GAIF01031817.1 | 0.8    | 0      | 0      | 5.15   | 25.87  | 0      |
| GAIF01031818.1 | 56.91  | 53.43  | 28.8   | 69.74  | 72.95  | 9.04   |
| GAIF01031819.1 | 50.37  | 56.69  | 17.45  | 80.44  | 73.11  | 29.92  |

|                |        |       |        |        |        |       |
|----------------|--------|-------|--------|--------|--------|-------|
| GAIF01031821.1 | 0.55   | 0.6   | 0.53   | 4.63   | 9.43   | 0     |
| GAIF01031822.1 | 8.68   | 13.37 | 9.87   | 22.03  | 13.59  | 3.88  |
| GAIF01031823.1 | 281.29 | 34.16 | 75.97  | 3.88   | 2.13   | 7.94  |
| GAIF01031824.1 | 0.42   | 0.09  | 0      | 1.28   | 4.58   | 0.75  |
| GAIF01031825.1 | 0.28   | 0     | 0      | 0      | 0      | 0     |
| GAIF01031826.1 | 0.56   | 0     | 0      | 0      | 0      | 0     |
| GAIF01031827.1 | 15.54  | 16.24 | 0.5    | 62.7   | 76.62  | 2.78  |
| GAIF01031828.1 | 1      | 2.1   | 0.83   | 2.48   | 5.74   | 0.2   |
| GAIF01031830.1 | 0.79   | 0     | 0      | 0.55   | 5.5    | 0.35  |
| GAIF01031832.1 | 9.79   | 8.45  | 9.94   | 1.49   | 0.33   | 0.3   |
| GAIF01031834.1 | 0      | 0     | 0      | 1.4    | 16.34  | 0     |
| GAIF01031836.1 | 0      | 0     | 0      | 0.44   | 1.83   | 0     |
| GAIF01031837.1 | 0      | 0     | 0      | 0.28   | 0.29   | 0     |
| GAIF01031838.1 | 6.89   | 1.38  | 3.05   | 2.39   | 0.29   | 0.07  |
| GAIF01031839.1 | 1.1    | 1.2   | 1.45   | 0.85   | 1.59   | 0.41  |
| GAIF01031842.1 | 34.43  | 22.28 | 30.73  | 52.42  | 40.71  | 97.45 |
| GAIF01031844.1 | 168.16 | 56.29 | 30.69  | 299.09 | 232.64 | 38.52 |
| GAIF01031845.1 | 0.27   | 1.51  | 0.83   | 2.75   | 6.16   | 1.21  |
| GAIF01031847.1 | 0.13   | 0.43  | 0      | 0.61   | 0.63   | 0.14  |
| GAIF01031849.1 | 4.89   | 0     | 1.03   | 12.95  | 6.53   | 7.15  |
| GAIF01031850.1 | 0.41   | 0.05  | 0      | 0.43   | 1.27   | 0     |
| GAIF01031852.1 | 0      | 0     | 0      | 0      | 0.21   | 0     |
| GAIF01031853.1 | 0      | 1.02  | 0.12   | 0      | 0.07   | 0.06  |
| GAIF01031854.1 | 13.78  | 21.74 | 12.01  | 45.3   | 21.13  | 3.13  |
| GAIF01031855.1 | 0      | 0.7   | 0.18   | 0      | 3.68   | 0     |
| GAIF01031856.1 | 0.25   | 0.07  | 0      | 1.72   | 7.7    | 0.41  |
| GAIF01031858.1 | 0.06   | 0     | 0      | 0.2    | 0      | 0.06  |
| GAIF01031859.1 | 0.85   | 0     | 0.48   | 1.03   | 1.66   | 0     |
| GAIF01031860.1 | 0      | 0     | 0      | 0.16   | 0      | 0     |
| GAIF01031861.1 | 0      | 0     | 0      | 0.2    | 0      | 0     |
| GAIF01031862.1 | 9.17   | 8.3   | 0.57   | 40.91  | 57.47  | 0.1   |
| GAIF01031863.1 | 3.16   | 3.5   | 6.81   | 0      | 0      | 0     |
| GAIF01031864.1 | 6.71   | 0.31  | 0      | 20.71  | 51.17  | 2.08  |
| GAIF01031868.1 | 52.13  | 82    | 132.74 | 27.6   | 28.06  | 61.12 |
| GAIF01031869.1 | 0.08   | 0     | 0      | 0      | 0      | 0     |
| GAIF01031872.1 | 0.68   | 0     | 0      | 0      | 0      | 0     |
| GAIF01031873.1 | 0      | 0.05  | 0      | 0.05   | 0      | 0     |
| GAIF01031874.1 | 0      | 0     | 0      | 0.09   | 0.46   | 0     |
| GAIF01031875.1 | 0      | 0     | 0      | 1.64   | 4.16   | 0.17  |
| GAIF01031876.1 | 2.46   | 10.17 | 9.37   | 4.05   | 4.55   | 2     |
| GAIF01031878.1 | 0      | 1.09  | 0      | 0      | 0      | 0     |
| GAIF01031880.1 | 0      | 0     | 0      | 0.41   | 0.21   | 0     |
| GAIF01031882.1 | 0.32   | 0.06  | 0.18   | 99.4   | 4.85   | 25.83 |
| GAIF01031883.1 | 0      | 0     | 0.22   | 0      | 0.74   | 0     |

|                |        |        |         |        |        |       |
|----------------|--------|--------|---------|--------|--------|-------|
| GAIF01031888.1 | 10.2   | 7.26   | 14.78   | 27.38  | 23.91  | 12.58 |
| GAIF01031889.1 | 0.55   | 0.07   | 0       | 0.35   | 0.22   | 0.4   |
| GAIF01031893.1 | 8.56   | 6.96   | 7.62    | 10.07  | 3.25   | 1.39  |
| GAIF01031894.1 | 0.12   | 0.13   | 0       | 0.28   | 1.02   | 0.33  |
| GAIF01031895.1 | 61.49  | 81.49  | 53.74   | 84.38  | 50.93  | 17.3  |
| GAIF01031896.1 | 0.15   | 0.08   | 0       | 0.09   | 0.72   | 0     |
| GAIF01031898.1 | 0      | 0      | 0       | 0.02   | 0.08   | 0     |
| GAIF01031899.1 | 71.7   | 102.43 | 102.88  | 95.46  | 46.39  | 44.52 |
| GAIF01031901.1 | 0      | 0      | 0       | 0      | 0.15   | 0     |
| GAIF01031902.1 | 11.01  | 3.98   | 6.33    | 30.47  | 52.26  | 15.91 |
| GAIF01031903.1 | 28.02  | 51.72  | 48.83   | 61.41  | 45.48  | 13.32 |
| GAIF01031904.1 | 0      | 0      | 0       | 2.61   | 1.24   | 0     |
| GAIF01031906.1 | 466.71 | 2818.8 | 1285.23 | 148.86 | 264.34 | 82.49 |
| GAIF01031908.1 | 41.83  | 58.43  | 47.37   | 36.3   | 33.64  | 2.87  |
| GAIF01031909.1 | 0.84   | 0.09   | 0.09    | 0.39   | 0.1    | 0     |
| GAIF01031911.1 | 2.07   | 3.26   | 2.36    | 9.66   | 6.27   | 0.77  |
| GAIF01031912.1 | 0.05   | 0      | 0       | 0.05   | 0.34   | 0.05  |
| GAIF01031913.1 | 17.61  | 24.49  | 18.89   | 35.93  | 24.66  | 2.51  |
| GAIF01031915.1 | 11.13  | 10.55  | 14.73   | 22.86  | 13.46  | 12.71 |
| GAIF01031916.1 | 0      | 0      | 0       | 2.5    | 5.65   | 1.1   |
| GAIF01031917.1 | 0      | 0      | 0       | 0.05   | 0      | 0     |
| GAIF01031920.1 | 15.03  | 21.78  | 31.2    | 20.01  | 10.19  | 12.63 |
| GAIF01031921.1 | 5.26   | 5.06   | 4.19    | 0.74   | 0      | 1.33  |
| GAIF01031923.1 | 0.21   | 0.2    | 0       | 2.29   | 11.72  | 0     |
| GAIF01031924.1 | 0      | 0      | 0.05    | 0.06   | 0.06   | 0     |
| GAIF01031925.1 | 0      | 0.21   | 0       | 0      | 0      | 0     |
| GAIF01031926.1 | 0      | 0      | 0       | 0      | 0.14   | 0     |
| GAIF01031927.1 | 0.27   | 0.3    | 0.04    | 1.86   | 3.54   | 0     |
| GAIF01031929.1 | 91.97  | 50.97  | 32.23   | 93.65  | 29.95  | 14.04 |
| GAIF01031930.1 | 0.16   | 2.05   | 0.41    | 2.86   | 9.17   | 0.77  |
| GAIF01031931.1 | 40.86  | 30.21  | 25.9    | 18.34  | 7.12   | 12.08 |
| GAIF01031933.1 | 0.11   | 0      | 0       | 2.06   | 7.88   | 0     |
| GAIF01031934.1 | 0      | 0.06   | 0       | 0.07   | 0.32   | 0     |
| GAIF01031936.1 | 95.46  | 70.48  | 38.95   | 18.24  | 26.87  | 3.84  |
| GAIF01031937.1 | 1.5    | 1.98   | 0.41    | 3.28   | 2.83   | 0.82  |
| GAIF01031939.1 | 0.48   | 0.1    | 0.11    | 4.46   | 17.89  | 1.27  |
| GAIF01031941.1 | 1.81   | 1.36   | 0.15    | 13.41  | 37.08  | 0.84  |
| GAIF01031942.1 | 0      | 0.19   | 0       | 0      | 0      | 0     |
| GAIF01031944.1 | 0.26   | 0.75   | 0.15    | 0.89   | 0.73   | 0     |
| GAIF01031945.1 | 0      | 0      | 0       | 0      | 0.78   | 0.19  |
| GAIF01031947.1 | 0.53   | 0      | 0.32    | 0      | 0      | 0.52  |
| GAIF01031948.1 | 93.6   | 8.1    | 5.69    | 13.89  | 40.77  | 45.42 |
| GAIF01031949.1 | 0.13   | 0.14   | 0       | 0.29   | 2.5    | 0.07  |
| GAIF01031950.1 | 0.04   | 0.05   | 0       | 0.81   | 2.5    | 0.29  |



|                |         |        |        |        |        |        |
|----------------|---------|--------|--------|--------|--------|--------|
| GAIF01031951.1 | 0.04    | 0.04   | 0      | 0.14   | 0.9    | 0.13   |
| GAIF01031952.1 | 432.39  | 123.22 | 146.46 | 197.88 | 183.05 | 167.33 |
| GAIF01031953.1 | 11.61   | 4.24   | 5.92   | 10.18  | 10.58  | 12.63  |
| GAIF01031955.1 | 13.36   | 21.7   | 9.72   | 36.75  | 28.33  | 2.32   |
| GAIF01031956.1 | 0       | 0      | 0.22   | 0.24   | 0      | 0      |
| GAIF01031957.1 | 0       | 1.67   | 3.97   | 0      | 0      | 0.52   |
| GAIF01031958.1 | 0.61    | 0.18   | 0.05   | 2.42   | 12.7   | 4.75   |
| GAIF01031960.1 | 0       | 0      | 0.32   | 0      | 0      | 0      |
| GAIF01031961.1 | 0       | 0.11   | 0      | 0      | 0      | 0      |
| GAIF01031962.1 | 91.91   | 100.63 | 84.32  | 40.78  | 41.55  | 15.15  |
| GAIF01031963.1 | 0       | 0      | 0      | 0      | 0.28   | 0      |
| GAIF01031964.1 | 0       | 0      | 0      | 0      | 0.01   | 0      |
| GAIF01031965.1 | 15.2    | 35.82  | 11.11  | 67.2   | 64.11  | 3.43   |
| GAIF01031966.1 | 0       | 0.1    | 0.05   | 0.6    | 0.23   | 0      |
| GAIF01031967.1 | 0.21    | 0.58   | 0.7    | 0.25   | 0.13   | 0.35   |
| GAIF01031969.1 | 0       | 0.2    | 0      | 0.43   | 0.22   | 0      |
| GAIF01031970.1 | 31.88   | 29.58  | 18.32  | 112    | 64.16  | 15.69  |
| GAIF01031972.1 | 318.85  | 347.15 | 131.12 | 30.83  | 82.87  | 25.67  |
| GAIF01031973.1 | 0.11    | 0      | 0      | 11.38  | 0      | 0      |
| GAIF01031976.1 | 0.45    | 0.1    | 0      | 1.23   | 2.56   | 0      |
| GAIF01031977.1 | 2.86    | 5.02   | 4.54   | 4.47   | 3.55   | 0.57   |
| GAIF01031979.1 | 0       | 0      | 0      | 0.37   | 0.49   | 0      |
| GAIF01031980.1 | 0.1     | 0      | 0.4    | 0.11   | 0.31   | 0      |
| GAIF01031981.1 | 0       | 0      | 0      | 0.2    | 0      | 0      |
| GAIF01031982.1 | 0       | 0.14   | 0      | 0.59   | 2.77   | 0      |
| GAIF01031984.1 | 0.9     | 0.98   | 1.78   | 0.42   | 0.65   | 1.39   |
| GAIF01031987.1 | 0       | 0      | 0.14   | 0      | 0      | 0      |
| GAIF01031988.1 | 0       | 0.22   | 0      | 0      | 0.12   | 0      |
| GAIF01031989.1 | 0       | 0      | 0      | 0      | 0.21   | 0.03   |
| GAIF01031990.1 | 0       | 0.32   | 0.13   | 0      | 0      | 0.46   |
| GAIF01031992.1 | 0.13    | 0      | 0      | 0      | 0      | 0.07   |
| GAIF01031993.1 | 60.5    | 62.09  | 49.9   | 83.35  | 48.17  | 72.63  |
| GAIF01031994.1 | 259.32  | 93.92  | 92.98  | 142.91 | 125.96 | 274.11 |
| GAIF01031995.1 | 1.01    | 3.19   | 5.26   | 0      | 2.3    | 0      |
| GAIF01031996.1 | 0.28    | 0      | 0      | 0      | 0      | 0.08   |
| GAIF01031997.1 | 0.09    | 0      | 0      | 0.96   | 3.27   | 0      |
| GAIF01031999.1 | 158.35  | 158.86 | 361.07 | 89.25  | 50.21  | 160.23 |
| GAIF01032000.1 | 0.43    | 0.16   | 0      | 2.15   | 6.69   | 7.71   |
| GAIF01032001.1 | 0       | 0.15   | 0      | 0      | 0.12   | 0      |
| GAIF01032002.1 | 34.1    | 64.39  | 17.81  | 180.51 | 94.58  | 4.9    |
| GAIF01032005.1 | 161.27  | 231.66 | 249.44 | 97.37  | 65.82  | 21.97  |
| GAIF01032007.1 | 15.67   | 18.73  | 7.35   | 46.23  | 29.77  | 2.9    |
| GAIF01032008.1 | 1270.14 | 327.78 | 139.6  | 335.95 | 337.43 | 80.75  |
| GAIF01032010.1 | 0       | 0.09   | 0      | 0.13   | 0.04   | 0.04   |

|                |         |         |          |         |         |          |
|----------------|---------|---------|----------|---------|---------|----------|
| GAIF01032011.1 | 43.7    | 33.49   | 40.9     | 47.51   | 22.52   | 20.75    |
| GAIF01032013.1 | 0       | 0       | 0        | 0.16    | 0       | 0        |
| GAIF01032014.1 | 0       | 0       | 0        | 0.31    | 1.26    | 0        |
| GAIF01032016.1 | 0.56    | 0.12    | 0        | 1.17    | 6.94    | 0.12     |
| GAIF01032017.1 | 0.02    | 0       | 0        | 0.06    | 0.02    | 0        |
| GAIF01032018.1 | 0       | 0       | 0        | 0       | 0       | 0.25     |
| GAIF01032020.1 | 6.85    | 4.8     | 4.18     | 2.83    | 0.73    | 0        |
| GAIF01032021.1 | 0       | 0       | 0        | 0.14    | 0.14    | 0        |
| GAIF01032022.1 | 13.44   | 15.96   | 5.23     | 42.58   | 36.06   | 3.1      |
| GAIF01032024.1 | 0.06    | 0       | 0        | 0       | 0.1     | 0        |
| GAIF01032025.1 | 5906.96 | 6762.02 | 16125.26 | 3529.25 | 2495.76 | 17948.05 |
| GAIF01032026.1 | 0       | 0       | 0.46     | 0.96    | 1       | 0.26     |
| GAIF01032027.1 | 0       | 0.06    | 0        | 0       | 0       | 0        |
| GAIF01032028.1 | 7.02    | 5.05    | 7.18     | 19.67   | 21.26   | 13.11    |
| GAIF01032029.1 | 4.62    | 0.52    | 0        | 5.62    | 8.59    | 2.13     |
| GAIF01032030.1 | 8.14    | 10.98   | 10.16    | 15.75   | 8.77    | 6.91     |
| GAIF01032031.1 | 11.73   | 5.76    | 0        | 6.21    | 3.14    | 0        |
| GAIF01032033.1 | 1.09    | 3.42    | 0        | 1.71    | 0       | 0        |
| GAIF01032036.1 | 153.59  | 295.82  | 214.79   | 124.56  | 158.64  | 128.85   |
| GAIF01032037.1 | 0.74    | 0       | 0        | 0.49    | 0.76    | 0        |
| GAIF01032039.1 | 90.07   | 57.8    | 38.96    | 61.05   | 39.98   | 20.7     |
| GAIF01032041.1 | 1.11    | 0.6     | 0.12     | 1.03    | 2.01    | 0.12     |
| GAIF01032043.1 | 0.34    | 0.09    | 0        | 1.17    | 6.02    | 0.32     |
| GAIF01032044.1 | 0       | 0.07    | 0.15     | 5.56    | 25.18   | 0.08     |
| GAIF01032045.1 | 5       | 0.16    | 0        | 9.05    | 22.47   | 0.16     |
| GAIF01032046.1 | 26.34   | 30.57   | 65.86    | 23.48   | 18.12   | 83.67    |
| GAIF01032047.1 | 16.85   | 18.21   | 17.5     | 60.83   | 76.95   | 7.83     |
| GAIF01032048.1 | 0.79    | 1.45    | 0.09     | 0.73    | 2.55    | 0        |
| GAIF01032049.1 | 0.8     | 0.7     | 0.49     | 2.02    | 20.17   | 0.39     |
| GAIF01032050.1 | 0       | 0       | 0        | 0.11    | 0       | 0        |
| GAIF01032053.1 | 72.62   | 38.53   | 15.01    | 17.76   | 18.09   | 7.48     |
| GAIF01032055.1 | 0.86    | 1.59    | 2.33     | 5.09    | 5.99    | 1.17     |
| GAIF01032056.1 | 0.28    | 0       | 0.31     | 1.29    | 4.18    | 0.46     |
| GAIF01032057.1 | 13.94   | 0       | 0.01     | 4.09    | 0       | 0        |
| GAIF01032060.1 | 0       | 0       | 0        | 0.05    | 0       | 0        |
| GAIF01032061.1 | 2.44    | 4.2     | 1.99     | 7.59    | 8.06    | 0.26     |
| GAIF01032062.1 | 0       | 0       | 0        | 0.04    | 0.04    | 0        |
| GAIF01032063.1 | 0       | 0       | 0        | 0.2     | 0       | 0.34     |
| GAIF01032064.1 | 328.58  | 408.37  | 191.72   | 963.57  | 912.97  | 65.36    |
| GAIF01032065.1 | 0       | 0       | 0        | 0       | 0.26    | 0.01     |
| GAIF01032066.1 | 0       | 0       | 0.1      | 0       | 0       | 0        |
| GAIF01032068.1 | 97.35   | 70.03   | 62.1     | 0.23    | 0.24    | 0.11     |
| GAIF01032069.1 | 0.48    | 0.39    | 0.27     | 0       | 0       | 0        |
| GAIF01032070.1 | 1.41    | 0.76    | 0        | 2.24    | 3.38    | 0        |

|                |        |        |        |        |        |        |
|----------------|--------|--------|--------|--------|--------|--------|
| GAIF01032071.1 | 0.35   | 1.31   | 0.47   | 1.5    | 6.02   | 0.1    |
| GAIF01032072.1 | 0.6    | 0.12   | 0.03   | 0.33   | 8.33   | 0      |
| GAIF01032073.1 | 0.2    | 0.11   | 0.34   | 6.89   | 0      | 0      |
| GAIF01032075.1 | 93.71  | 89.6   | 139.55 | 140.63 | 123.21 | 131.33 |
| GAIF01032076.1 | 0.3    | 0.27   | 0.15   | 0.43   | 1.54   | 0.07   |
| GAIF01032081.1 | 2.56   | 1.82   | 1.83   | 1.87   | 1.18   | 0.7    |
| GAIF01032082.1 | 0.46   | 0.22   | 0      | 2.63   | 4.58   | 0      |
| GAIF01032083.1 | 5.69   | 8.29   | 6.72   | 12.04  | 9.34   | 1.71   |
| GAIF01032084.1 | 2.26   | 0.62   | 0.31   | 8.05   | 17.7   | 5.62   |
| GAIF01032085.1 | 12.04  | 17.97  | 6.23   | 14.68  | 12.02  | 1.98   |
| GAIF01032086.1 | 0.2    | 0.16   | 0      | 0.68   | 2.18   | 0      |
| GAIF01032087.1 | 1.84   | 3.25   | 2.93   | 9.37   | 6.06   | 3.66   |
| GAIF01032089.1 | 0      | 0      | 0      | 0      | 0.05   | 0      |
| GAIF01032091.1 | 0.16   | 0.17   | 0.09   | 0      | 0      | 0.71   |
| GAIF01032093.1 | 0      | 0      | 0.1    | 0      | 0      | 0      |
| GAIF01032096.1 | 0      | 0      | 0      | 0      | 0      | 0.07   |
| GAIF01032097.1 | 9.1    | 12.4   | 20.22  | 15.25  | 12.5   | 0.01   |
| GAIF01032098.1 | 0.4    | 0      | 0.18   | 0.39   | 2.25   | 0      |
| GAIF01032100.1 | 33.35  | 35.65  | 39.11  | 74.8   | 46.11  | 28.68  |
| GAIF01032101.1 | 21.08  | 28.92  | 8.69   | 71.97  | 77.58  | 5.47   |
| GAIF01032103.1 | 0.15   | 0.43   | 0.27   | 0.23   | 1.5    | 0.28   |
| GAIF01032104.1 | 0.16   | 0      | 0      | 0.47   | 1.56   | 0      |
| GAIF01032105.1 | 0.31   | 0.71   | 0      | 1.14   | 12.03  | 0      |
| GAIF01032106.1 | 0.05   | 0.05   | 0      | 0.2    | 0.23   | 0.03   |
| GAIF01032107.1 | 0      | 0      | 0      | 0      | 0.11   | 0      |
| GAIF01032108.1 | 3.98   | 0.94   | 1.18   | 6.62   | 17.45  | 7.8    |
| GAIF01032109.1 | 0.27   | 0.42   | 0.48   | 0.89   | 4.41   | 0.12   |
| GAIF01032110.1 | 0      | 0.54   | 1.64   | 0      | 0.15   | 0.14   |
| GAIF01032111.1 | 1.4    | 1.27   | 0      | 0.85   | 2.29   | 0.6    |
| GAIF01032112.1 | 0      | 0.22   | 0.05   | 0.05   | 0      | 0.04   |
| GAIF01032113.1 | 0      | 0.29   | 0      | 0      | 0      | 0.3    |
| GAIF01032114.1 | 0      | 0      | 0      | 0      | 0.35   | 0      |
| GAIF01032116.1 | 1.38   | 0      | 0.17   | 4.88   | 21.08  | 2.3    |
| GAIF01032118.1 | 0      | 0      | 0.21   | 0      | 0.24   | 0      |
| GAIF01032119.1 | 13.16  | 26.28  | 11.99  | 33.55  | 28.07  | 3.72   |
| GAIF01032120.1 | 0.2    | 0.21   | 0.22   | 0      | 0.23   | 0      |
| GAIF01032121.1 | 29.86  | 12.85  | 3.74   | 11.55  | 20.5   | 1.75   |
| GAIF01032122.1 | 0      | 0      | 0      | 0.43   | 0      | 0.13   |
| GAIF01032124.1 | 1.37   | 3.12   | 1.58   | 0.63   | 1.07   | 0.6    |
| GAIF01032125.1 | 0.01   | 0      | 0      | 0.02   | 0.18   | 0      |
| GAIF01032126.1 | 56.59  | 28.08  | 11.27  | 196.32 | 115.71 | 18.56  |
| GAIF01032127.1 | 632.86 | 504.28 | 928.38 | 49.87  | 21.07  | 69.02  |
| GAIF01032128.1 | 0      | 0      | 0      | 0      | 0.06   | 0      |
| GAIF01032130.1 | 0      | 0.67   | 0.68   | 0      | 0      | 0.68   |

|                |         |         |         |        |        |        |
|----------------|---------|---------|---------|--------|--------|--------|
| GAIF01032131.1 | 0.56    | 0.68    | 0       | 0      | 0      | 0      |
| GAIF01032132.1 | 1.69    | 2.41    | 1.96    | 2.31   | 5.67   | 0.43   |
| GAIF01032133.1 | 0       | 0       | 0       | 0.3    | 1.86   | 0      |
| GAIF01032134.1 | 12.57   | 12.21   | 12.38   | 25.58  | 30.27  | 3.96   |
| GAIF01032136.1 | 0       | 0       | 0       | 0.08   | 0.16   | 0      |
| GAIF01032137.1 | 0.27    | 0.67    | 0.83    | 0.16   | 0      | 0.23   |
| GAIF01032138.1 | 0.09    | 0.06    | 0.1     | 0.31   | 0.67   | 0.06   |
| GAIF01032139.1 | 26.84   | 35.31   | 29.35   | 24.43  | 39.92  | 8.58   |
| GAIF01032140.1 | 13.44   | 18.3    | 12.29   | 68.45  | 41.24  | 4.95   |
| GAIF01032141.1 | 5.14    | 9.01    | 9       | 28.7   | 17.38  | 2.14   |
| GAIF01032143.1 | 0       | 0       | 0.02    | 0.01   | 0      | 0.05   |
| GAIF01032145.1 | 5.54    | 4.85    | 4.59    | 12.86  | 9.22   | 2.67   |
| GAIF01032146.1 | 127.23  | 55.84   | 30.84   | 264.15 | 290.49 | 57.86  |
| GAIF01032147.1 | 1.6     | 0.31    | 0.27    | 3.8    | 17.08  | 6.18   |
| GAIF01032148.1 | 0.53    | 0.33    | 0.25    | 0.09   | 0.18   | 0      |
| GAIF01032149.1 | 2655.64 | 2970.15 | 3277.03 | 814.45 | 306.94 | 171.46 |
| GAIF01032151.1 | 0       | 0.49    | 0       | 0      | 1.5    | 0      |
| GAIF01032153.1 | 0.03    | 0.09    | 0.06    | 0.2    | 1.69   | 0.09   |
| GAIF01032154.1 | 29.05   | 41.54   | 8.7     | 6.42   | 6.86   | 0.89   |
| GAIF01032155.1 | 418.49  | 219.84  | 290.52  | 49     | 48.42  | 69.32  |
| GAIF01032156.1 | 0.06    | 0.09    | 0.01    | 1.87   | 8.2    | 0.11   |
| GAIF01032157.1 | 253.63  | 199.29  | 115.8   | 0.1    | 0.6    | 0      |
| GAIF01032158.1 | 0.07    | 0       | 0       | 0.42   | 1.23   | 0.08   |
| GAIF01032159.1 | 0.38    | 0.42    | 0.24    | 1.33   | 2.11   | 0      |
| GAIF01032160.1 | 0       | 0.08    | 0       | 0      | 0.61   | 0      |
| GAIF01032161.1 | 0.23    | 0.33    | 0.25    | 0.51   | 0.17   | 0.23   |
| GAIF01032162.1 | 33.06   | 46.84   | 33.23   | 56.21  | 42.14  | 9.24   |
| GAIF01032163.1 | 11.46   | 0       | 0       | 38.87  | 31.18  | 60.28  |
| GAIF01032164.1 | 23.99   | 15.07   | 13.17   | 34.63  | 42.73  | 26.3   |
| GAIF01032165.1 | 0       | 0       | 0       | 0.1    | 0.05   | 0.05   |
| GAIF01032169.1 | 14.84   | 3.5     | 7.54    | 13.9   | 25.49  | 30.7   |
| GAIF01032170.1 | 0.24    | 0       | 0       | 0.47   | 1.94   | 0      |
| GAIF01032171.1 | 0.41    | 0.13    | 0.08    | 2.16   | 8.3    | 0.84   |
| GAIF01032174.1 | 0       | 0       | 0.13    | 0      | 0      | 0.26   |
| GAIF01032176.1 | 0       | 0       | 0.08    | 0      | 0      | 0      |
| GAIF01032177.1 | 3.53    | 7.79    | 8.03    | 0.42   | 0.31   | 0.17   |
| GAIF01032179.1 | 0.54    | 0.59    | 0.15    | 7.7    | 36.3   | 0.45   |
| GAIF01032180.1 | 76.43   | 50.74   | 20.68   | 118.77 | 75.76  | 5.86   |
| GAIF01032182.1 | 0.76    | 0.2     | 0.06    | 1.02   | 2.46   | 0.94   |
| GAIF01032183.1 | 0.15    | 0.24    | 0       | 1.11   | 1.59   | 0.73   |
| GAIF01032184.1 | 0       | 0.1     | 0       | 0.31   | 1.41   | 0      |
| GAIF01032187.1 | 0.2     | 0.34    | 0       | 0.92   | 0.69   | 0.2    |
| GAIF01032188.1 | 0.89    | 0       | 0.23    | 2.23   | 14.03  | 12.1   |
| GAIF01032189.1 | 0       | 0.02    | 0.04    | 0.09   | 0.33   | 0.01   |

|                |        |        |        |        |        |        |
|----------------|--------|--------|--------|--------|--------|--------|
| GAIF01032193.1 | 1.61   | 3.84   | 1.67   | 3.63   | 5.79   | 1.06   |
| GAIF01032194.1 | 0.13   | 0.07   | 0.07   | 0.23   | 1.42   | 0.13   |
| GAIF01032195.1 | 63.31  | 83.91  | 53.49  | 211.12 | 168.65 | 26.05  |
| GAIF01032196.1 | 76.24  | 199.14 | 17.5   | 32.39  | 143.76 | 22.97  |
| GAIF01032198.1 | 160.01 | 103.39 | 185.94 | 90.63  | 72.48  | 85.21  |
| GAIF01032200.1 | 0      | 0      | 0      | 0.21   | 1.17   | 0.13   |
| GAIF01032202.1 | 0      | 0      | 0      | 0      | 0.59   | 0      |
| GAIF01032203.1 | 0.21   | 0.18   | 0.05   | 2.6    | 4.83   | 0.5    |
| GAIF01032204.1 | 0.77   | 0.52   | 0.33   | 2.42   | 7.66   | 0.79   |
| GAIF01032206.1 | 0      | 0      | 0      | 0      | 0.04   | 0      |
| GAIF01032207.1 | 0      | 0      | 0      | 0.09   | 0.6    | 0      |
| GAIF01032208.1 | 1.28   | 0.13   | 0      | 2.97   | 8.24   | 0.9    |
| GAIF01032209.1 | 0      | 0      | 0      | 0.11   | 0      | 0      |
| GAIF01032210.1 | 0.99   | 1.08   | 0.62   | 1.18   | 1.74   | 0      |
| GAIF01032211.1 | 0      | 0.02   | 0      | 0.02   | 0.18   | 0      |
| GAIF01032213.1 | 6.02   | 9.35   | 17.5   | 13.91  | 4.12   | 7.58   |
| GAIF01032215.1 | 0.9    | 0.9    | 0.25   | 3.85   | 6.8    | 0      |
| GAIF01032216.1 | 132.85 | 38.02  | 38.38  | 232.6  | 226.2  | 45.34  |
| GAIF01032219.1 | 0.63   | 1.38   | 0.23   | 7.31   | 4.88   | 0.33   |
| GAIF01032221.1 | 4.4    | 13.3   | 1.82   | 23.02  | 91.25  | 0.71   |
| GAIF01032223.1 | 18.74  | 12.07  | 14.35  | 19.42  | 11.17  | 27.93  |
| GAIF01032224.1 | 91.27  | 66.54  | 62.77  | 117.85 | 101.44 | 73.43  |
| GAIF01032225.1 | 0.42   | 0.13   | 0.07   | 2.58   | 9.61   | 2.05   |
| GAIF01032226.1 | 49.23  | 49.11  | 51.28  | 40.98  | 63.72  | 27.15  |
| GAIF01032228.1 | 0      | 0.14   | 0.03   | 1.26   | 7.45   | 1.61   |
| GAIF01032231.1 | 0.01   | 0.33   | 0      | 0.06   | 0      | 0.11   |
| GAIF01032232.1 | 0      | 0      | 0      | 0      | 0.11   | 0      |
| GAIF01032233.1 | 0      | 0      | 0      | 0      | 0.48   | 0      |
| GAIF01032234.1 | 122.38 | 38.02  | 166.21 | 13.41  | 13.02  | 19.27  |
| GAIF01032235.1 | 394.24 | 374.98 | 545.84 | 249.03 | 182.28 | 834.48 |
| GAIF01032236.1 | 12.91  | 24.82  | 21.81  | 32.04  | 28.24  | 8.54   |
| GAIF01032238.1 | 0.7    | 0      | 0.05   | 1.41   | 3.95   | 5.76   |
| GAIF01032240.1 | 0      | 0      | 0      | 0      | 0.04   | 0      |
| GAIF01032241.1 | 1.03   | 1.91   | 0.4    | 2.04   | 1.53   | 0.47   |
| GAIF01032244.1 | 3.88   | 0.55   | 1.33   | 0      | 0      | 0      |
| GAIF01032245.1 | 1.52   | 0      | 0.65   | 0      | 0      | 0      |
| GAIF01032247.1 | 0      | 0.32   | 0.21   | 0.22   | 0.47   | 0      |
| GAIF01032248.1 | 51.88  | 24.6   | 24.94  | 75.45  | 75.44  | 73.75  |
| GAIF01032249.1 | 0.12   | 0.07   | 0      | 0.07   | 0.44   | 0      |
| GAIF01032250.1 | 0      | 0      | 0      | 0      | 0      | 0.42   |
| GAIF01032251.1 | 3.33   | 2.29   | 0.5    | 1.53   | 1.81   | 0.58   |
| GAIF01032252.1 | 134.47 | 81.26  | 55.64  | 135.24 | 180.92 | 119.94 |
| GAIF01032253.1 | 23.44  | 24.5   | 22.09  | 31.88  | 36.3   | 42.52  |
| GAIF01032254.1 | 0.08   | 0.04   | 0      | 0.14   | 0.45   | 0      |

|                |       |        |        |        |       |       |
|----------------|-------|--------|--------|--------|-------|-------|
| GAIF01032255.1 | 20.64 | 19.27  | 23.5   | 54.08  | 37.53 | 18.15 |
| GAIF01032256.1 | 4.17  | 1.6    | 1.02   | 15.42  | 46.99 | 3.42  |
| GAIF01032257.1 | 7.75  | 6.76   | 2.09   | 16.03  | 30.59 | 3.14  |
| GAIF01032258.1 | 0     | 0      | 0      | 0      | 0.07  | 0     |
| GAIF01032259.1 | 0     | 0      | 0      | 0.35   | 1.84  | 0     |
| GAIF01032260.1 | 0     | 0      | 0      | 15.22  | 0     | 0     |
| GAIF01032261.1 | 0.59  | 0.3    | 0.28   | 0.38   | 4.16  | 0.05  |
| GAIF01032263.1 | 0.09  | 0.2    | 0      | 1.67   | 6.59  | 0.1   |
| GAIF01032264.1 | 0.47  | 0      | 0      | 3.25   | 6.13  | 0.17  |
| GAIF01032265.1 | 3.75  | 2.67   | 1.51   | 9.51   | 26.87 | 2.05  |
| GAIF01032266.1 | 0     | 0      | 0      | 0      | 0.12  | 0     |
| GAIF01032267.1 | 0.72  | 0.81   | 0.36   | 1.37   | 3.92  | 0.15  |
| GAIF01032268.1 | 0.17  | 0      | 0.12   | 0      | 0.14  | 0     |
| GAIF01032269.1 | 4.74  | 3.14   | 2.99   | 2.49   | 0.84  | 0.41  |
| GAIF01032271.1 | 3.08  | 0.51   | 0.11   | 0      | 1.21  | 0     |
| GAIF01032272.1 | 69.29 | 116.43 | 125.53 | 103.57 | 70.39 | 34.61 |
| GAIF01032273.1 | 0.04  | 0      | 0      | 0      | 0     | 0     |
| GAIF01032274.1 | 28.43 | 34.96  | 29.27  | 66.22  | 28.06 | 14.05 |
| GAIF01032277.1 | 0     | 0.93   | 1.1    | 0      | 0     | 0.06  |
| GAIF01032279.1 | 11.68 | 61.92  | 14.8   | 2.88   | 4.71  | 0.21  |
| GAIF01032280.1 | 12.79 | 7.85   | 4.56   | 45.88  | 36.66 | 1.15  |
| GAIF01032281.1 | 0.56  | 0.11   | 0      | 2.42   | 7.21  | 2.3   |
| GAIF01032282.1 | 2.15  | 4.47   | 0      | 9.83   | 11.97 | 0     |
| GAIF01032284.1 | 0     | 0.94   | 0.44   | 0      | 0     | 0     |
| GAIF01032286.1 | 22.2  | 30.28  | 13.66  | 91.25  | 53.95 | 5.81  |
| GAIF01032289.1 | 0     | 0      | 0      | 0      | 0.07  | 0     |
| GAIF01032290.1 | 0.82  | 0.3    | 0.78   | 0.38   | 0.07  | 0.48  |
| GAIF01032292.1 | 0     | 0      | 0      | 0      | 0.04  | 0     |
| GAIF01032293.1 | 0     | 0      | 0      | 0      | 0.04  | 0     |
| GAIF01032295.1 | 1.6   | 0.5    | 0.63   | 1.06   | 0.55  | 0.25  |
| GAIF01032298.1 | 0.24  | 0      | 0      | 0.62   | 3.37  | 0.27  |
| GAIF01032299.1 | 3.07  | 2.25   | 5.13   | 15.97  | 8.88  | 2.64  |
| GAIF01032300.1 | 26.73 | 23.92  | 24.73  | 27.17  | 22.79 | 48.91 |
| GAIF01032301.1 | 0     | 0.59   | 0.61   | 0      | 0.66  | 0     |
| GAIF01032303.1 | 0.65  | 6.04   | 4.09   | 3.45   | 5.75  | 2.85  |
| GAIF01032304.1 | 11.77 | 9.37   | 9.26   | 22.13  | 21.68 | 12.24 |
| GAIF01032305.1 | 12.64 | 16.12  | 3.47   | 0      | 0.15  | 0     |
| GAIF01032307.1 | 0.6   | 0.52   | 0      | 0.42   | 0.14  | 0.13  |
| GAIF01032308.1 | 0     | 0      | 0      | 0.03   | 0     | 0     |
| GAIF01032309.1 | 1.99  | 3.99   | 2.39   | 2.31   | 4.59  | 1.14  |
| GAIF01032313.1 | 1.3   | 0.88   | 0.85   | 3.07   | 4.79  | 0.72  |
| GAIF01032316.1 | 33.98 | 36.03  | 35.22  | 105.54 | 96.18 | 17.07 |
| GAIF01032317.1 | 4.49  | 2.38   | 4.68   | 3.34   | 0.42  | 2.41  |
| GAIF01032318.1 | 7.47  | 19.24  | 13.13  | 5.42   | 3.58  | 0.39  |

|                |        |        |        |        |        |        |
|----------------|--------|--------|--------|--------|--------|--------|
| GAIF01032319.1 | 5.67   | 1.77   | 0.34   | 4.49   | 6      | 0.15   |
| GAIF01032320.1 | 0      | 0      | 0.06   | 0.19   | 1.34   | 0      |
| GAIF01032321.1 | 0.11   | 0      | 0      | 0      | 0.13   | 0.12   |
| GAIF01032322.1 | 0      | 0      | 0      | 0.28   | 0      | 0      |
| GAIF01032324.1 | 3.6    | 6.8    | 2.64   | 18.65  | 22.93  | 33.69  |
| GAIF01032325.1 | 0.16   | 0      | 0      | 0.38   | 3.31   | 0      |
| GAIF01032326.1 | 0.68   | 0.58   | 1.5    | 1.36   | 1.11   | 7.99   |
| GAIF01032328.1 | 0      | 0      | 0      | 0      | 0.29   | 0      |
| GAIF01032331.1 | 5.4    | 6.36   | 7.33   | 20.88  | 11.54  | 2.73   |
| GAIF01032334.1 | 3.27   | 1.14   | 0.9    | 16.15  | 34.17  | 0.77   |
| GAIF01032335.1 | 0      | 0      | 0      | 0      | 0.18   | 0      |
| GAIF01032337.1 | 4.08   | 4.54   | 3.21   | 3.62   | 1.91   | 1.8    |
| GAIF01032339.1 | 0.18   | 0      | 0      | 1.7    | 6.6    | 0      |
| GAIF01032340.1 | 4.39   | 3.45   | 1.77   | 4.82   | 3.39   | 1.03   |
| GAIF01032341.1 | 0      | 0      | 0      | 0      | 0.31   | 0      |
| GAIF01032342.1 | 3.02   | 2.03   | 0.59   | 4.46   | 4.18   | 0.76   |
| GAIF01032343.1 | 6.87   | 4.02   | 5.39   | 4.35   | 3.43   | 2.61   |
| GAIF01032345.1 | 0      | 0      | 0.14   | 0      | 0      | 0      |
| GAIF01032346.1 | 0.75   | 0.87   | 0.35   | 6.52   | 18.79  | 0.16   |
| GAIF01032347.1 | 4.46   | 4.09   | 4.52   | 14.02  | 26.43  | 22.94  |
| GAIF01032348.1 | 13.5   | 6.31   | 4.3    | 12.61  | 18.52  | 5.03   |
| GAIF01032349.1 | 63.31  | 31.46  | 27.67  | 52.79  | 49.55  | 13.17  |
| GAIF01032350.1 | 85.88  | 148.4  | 148.89 | 107.53 | 101.54 | 150.61 |
| GAIF01032351.1 | 0      | 0      | 0.57   | 3.78   | 0      | 1.93   |
| GAIF01032352.1 | 0.87   | 0.48   | 0.11   | 3.61   | 9.42   | 0.26   |
| GAIF01032353.1 | 0      | 0      | 0      | 0.11   | 0.63   | 0.05   |
| GAIF01032354.1 | 0      | 0      | 0      | 0      | 0      | 0.64   |
| GAIF01032357.1 | 0      | 0      | 0      | 0.39   | 0.18   | 0      |
| GAIF01032359.1 | 0.07   | 1.45   | 0.81   | 0      | 0.09   | 0.25   |
| GAIF01032360.1 | 7.1    | 6.85   | 2.11   | 7.26   | 7.43   | 0.51   |
| GAIF01032361.1 | 0.01   | 0      | 0.05   | 0.07   | 0      | 0.01   |
| GAIF01032362.1 | 1.61   | 0.4    | 0      | 1.05   | 0      | 0.03   |
| GAIF01032363.1 | 0      | 1.42   | 0.15   | 0      | 0      | 0      |
| GAIF01032365.1 | 262.07 | 191.04 | 305.1  | 109.74 | 83.43  | 182.38 |
| GAIF01032366.1 | 0.57   | 0      | 0.63   | 0.46   | 0      | 0      |
| GAIF01032369.1 | 4.48   | 3.08   | 3.83   | 4.25   | 4.03   | 5.04   |
| GAIF01032371.1 | 10.37  | 9.34   | 4.49   | 16.66  | 12.1   | 1.5    |
| GAIF01032372.1 | 0.13   | 0      | 0      | 0.39   | 0.24   | 0.15   |
| GAIF01032373.1 | 3.3    | 13.27  | 8.37   | 0      | 0.85   | 0      |
| GAIF01032374.1 | 1.57   | 0.37   | 0.53   | 1.58   | 3.16   | 0.83   |
| GAIF01032375.1 | 16.3   | 5.25   | 3.45   | 2.24   | 0.87   | 0.4    |
| GAIF01032376.1 | 0.13   | 0      | 0      | 0.25   | 1.78   | 0.06   |
| GAIF01032377.1 | 0.46   | 0.04   | 1.18   | 0.31   | 0      | 0      |
| GAIF01032378.1 | 1.52   | 2.46   | 5.4    | 4.41   | 4.12   | 15.54  |

|                |       |       |       |       |        |       |
|----------------|-------|-------|-------|-------|--------|-------|
| GAIF01032379.1 | 14.62 | 16.63 | 17.86 | 68.31 | 28.13  | 12.97 |
| GAIF01032380.1 | 0     | 0     | 0     | 0.24  | 0      | 0     |
| GAIF01032381.1 | 11.42 | 17.79 | 20.74 | 30.59 | 17.7   | 8.96  |
| GAIF01032382.1 | 0.4   | 0.22  | 0.22  | 1.38  | 5.12   | 2.18  |
| GAIF01032383.1 | 4.45  | 6.37  | 2.67  | 1.13  | 0.47   | 0.05  |
| GAIF01032384.1 | 0.05  | 4.16  | 2.32  | 0     | 0.06   | 0.33  |
| GAIF01032385.1 | 0     | 0.05  | 0     | 0     | 0.07   | 0     |
| GAIF01032386.1 | 0.03  | 0.07  | 0.14  | 0.68  | 3.96   | 0.1   |
| GAIF01032387.1 | 0     | 0     | 0     | 0     | 0.05   | 0     |
| GAIF01032388.1 | 6.21  | 5.74  | 7.35  | 14.89 | 14.31  | 3.71  |
| GAIF01032389.1 | 5.48  | 19.96 | 8.49  | 9.59  | 10.33  | 1.77  |
| GAIF01032390.1 | 0     | 0     | 0.15  | 0.56  | 0.38   | 0.15  |
| GAIF01032394.1 | 0.25  | 0.27  | 0.28  | 0.15  | 0.5    | 0.42  |
| GAIF01032396.1 | 0.01  | 0.09  | 0     | 0.37  | 2.94   | 0.01  |
| GAIF01032397.1 | 0.8   | 0.05  | 0     | 1.02  | 3.5    | 1.27  |
| GAIF01032398.1 | 0.58  | 0.47  | 1.5   | 0.17  | 0.35   | 0.16  |
| GAIF01032400.1 | 0     | 0     | 0.41  | 0     | 0      | 0     |
| GAIF01032401.1 | 1.88  | 1.46  | 0     | 6.84  | 19.17  | 5.46  |
| GAIF01032402.1 | 1.26  | 0     | 0     | 1.05  | 5.3    | 1.14  |
| GAIF01032403.1 | 4.34  | 5.03  | 5.92  | 5.94  | 8.09   | 3.01  |
| GAIF01032405.1 | 0.05  | 0.34  | 0.11  | 0.47  | 0      | 0     |
| GAIF01032406.1 | 0     | 0.55  | 0.47  | 0     | 0      | 0.04  |
| GAIF01032407.1 | 0     | 0     | 1.82  | 0     | 0      | 2.98  |
| GAIF01032408.1 | 42.58 | 41.91 | 32.82 | 59.33 | 30.24  | 15.92 |
| GAIF01032410.1 | 0     | 0.15  | 0     | 0     | 0.62   | 0     |
| GAIF01032411.1 | 1.94  | 0.5   | 0.78  | 0.25  | 0      | 0.07  |
| GAIF01032412.1 | 0.68  | 0.73  | 1.07  | 0.74  | 1.22   | 4.94  |
| GAIF01032413.1 | 51.17 | 83.62 | 69.09 | 160.1 | 162.45 | 76.73 |
| GAIF01032415.1 | 0     | 0     | 0.25  | 0     | 0      | 0     |
| GAIF01032417.1 | 0.05  | 0.18  | 0     | 0     | 0      | 0.06  |
| GAIF01032418.1 | 8.49  | 7.59  | 10.44 | 20.67 | 17.37  | 6.7   |
| GAIF01032421.1 | 0.05  | 0     | 0.03  | 0     | 0.03   | 0     |
| GAIF01032423.1 | 0     | 0     | 0     | 0     | 0.07   | 0     |
| GAIF01032424.1 | 0     | 0     | 0.01  | 0.02  | 0.01   | 0     |
| GAIF01032425.1 | 0.13  | 0.21  | 0     | 1.32  | 4.31   | 0.04  |
| GAIF01032427.1 | 0.17  | 0     | 0     | 0.88  | 2.34   | 0     |
| GAIF01032428.1 | 0.04  | 0     | 0     | 0     | 0      | 0     |
| GAIF01032429.1 | 0     | 0     | 0     | 0     | 0.06   | 0     |
| GAIF01032430.1 | 4.86  | 6.47  | 3.79  | 25.9  | 17.03  | 8.08  |
| GAIF01032432.1 | 10.85 | 8.16  | 4.18  | 23.84 | 13.46  | 1.78  |
| GAIF01032433.1 | 26.85 | 33.29 | 15.75 | 38.84 | 37.79  | 6.82  |
| GAIF01032434.1 | 19.94 | 22.79 | 26.26 | 41.48 | 37.98  | 6.92  |
| GAIF01032435.1 | 0.69  | 0.75  | 0.15  | 3.37  | 12.63  | 0     |
| GAIF01032436.1 | 8.54  | 24.69 | 17.35 | 34.42 | 39.13  | 4.77  |



|                |        |        |        |        |        |        |
|----------------|--------|--------|--------|--------|--------|--------|
| GAIF01032437.1 | 0.16   | 0.09   | 0      | 0.45   | 4.61   | 0.26   |
| GAIF01032438.1 | 0.15   | 0      | 0      | 0      | 0      | 0.11   |
| GAIF01032439.1 | 0.47   | 0.29   | 0.07   | 0.08   | 0      | 0.07   |
| GAIF01032440.1 | 23.71  | 23.32  | 32.84  | 38.98  | 18.89  | 31.73  |
| GAIF01032441.1 | 4.2    | 1.93   | 0      | 6.85   | 15.61  | 0      |
| GAIF01032442.1 | 3.11   | 4.02   | 1.93   | 1.22   | 0.7    | 0.14   |
| GAIF01032444.1 | 1.73   | 1.89   | 1.9    | 4.92   | 7.65   | 5.31   |
| GAIF01032446.1 | 0.67   | 1.27   | 0.43   | 3.63   | 4.77   | 0.06   |
| GAIF01032447.1 | 6.01   | 12.16  | 6.01   | 1.59   | 0.79   | 0.07   |
| GAIF01032449.1 | 0      | 0.05   | 0      | 0.15   | 1.65   | 0      |
| GAIF01032450.1 | 0      | 0      | 0      | 0.39   | 1.54   | 0      |
| GAIF01032451.1 | 1.77   | 0.13   | 0      | 4.47   | 17.62  | 2.17   |
| GAIF01032452.1 | 0.5    | 1.24   | 0.16   | 0.33   | 0      | 0      |
| GAIF01032453.1 | 0      | 0      | 0      | 0.84   | 8.91   | 1.26   |
| GAIF01032454.1 | 0.14   | 0.6    | 0      | 0.48   | 0.33   | 0.91   |
| GAIF01032455.1 | 37.95  | 34.97  | 44.83  | 98.76  | 62.81  | 35.83  |
| GAIF01032456.1 | 120.89 | 134.71 | 134.98 | 87.07  | 97.24  | 141.62 |
| GAIF01032458.1 | 184.44 | 61.37  | 19.11  | 255.86 | 295.09 | 94.46  |
| GAIF01032460.1 | 0      | 0      | 0      | 0      | 0.11   | 0      |
| GAIF01032461.1 | 0      | 0      | 0      | 0.14   | 0.56   | 0      |
| GAIF01032462.1 | 0.41   | 3.22   | 1.35   | 0.24   | 0      | 0      |
| GAIF01032465.1 | 0      | 0.12   | 0.06   | 0.4    | 0.27   | 0      |
| GAIF01032466.1 | 25.15  | 19.49  | 23.59  | 33.54  | 20.22  | 48.89  |
| GAIF01032468.1 | 0      | 0      | 0      | 0.14   | 0      | 0      |
| GAIF01032470.1 | 16.21  | 25.03  | 25.21  | 31.48  | 16.76  | 14.53  |
| GAIF01032472.1 | 0.57   | 0.12   | 0      | 0.95   | 6.33   | 0.46   |
| GAIF01032473.1 | 0.13   | 0.07   | 0      | 0.74   | 5.19   | 0      |
| GAIF01032474.1 | 5.46   | 1.72   | 0.3    | 67.64  | 206.77 | 3.93   |
| GAIF01032475.1 | 0      | 0.06   | 0      | 0      | 0      | 0      |
| GAIF01032476.1 | 13.82  | 11.55  | 9.49   | 28.12  | 51.03  | 16.02  |
| GAIF01032477.1 | 1.24   | 1.9    | 0.34   | 4.66   | 8.67   | 0      |
| GAIF01032480.1 | 6.21   | 5.26   | 5.62   | 4.04   | 2.71   | 2.64   |
| GAIF01032481.1 | 0      | 0      | 0      | 0.15   | 0.4    | 0.07   |
| GAIF01032482.1 | 5.45   | 2.79   | 1.78   | 32.21  | 49.12  | 2.94   |
| GAIF01032484.1 | 0      | 0.09   | 0      | 0.24   | 1.42   | 0      |
| GAIF01032485.1 | 0.84   | 0.91   | 0.61   | 1.37   | 2.34   | 0.15   |
| GAIF01032486.1 | 14.63  | 0.22   | 0.45   | 0.24   | 0.25   | 0      |
| GAIF01032488.1 | 4.36   | 0      | 0      | 0      | 0      | 0      |
| GAIF01032493.1 | 0.15   | 0.33   | 0.17   | 0.78   | 4.07   | 0.7    |
| GAIF01032496.1 | 26.36  | 24.14  | 26.26  | 35.83  | 22.92  | 20.15  |
| GAIF01032497.1 | 0.04   | 0      | 0      | 0      | 0.03   | 0      |
| GAIF01032498.1 | 0.23   | 0.42   | 0.17   | 0.69   | 0.53   | 0.14   |
| GAIF01032500.1 | 0.25   | 0      | 0.19   | 1.32   | 0.52   | 0      |
| GAIF01032506.1 | 0      | 0.32   | 0.16   | 9.13   | 2.5    | 4.09   |

|                |        |        |        |        |        |        |
|----------------|--------|--------|--------|--------|--------|--------|
| GAIF01032507.1 | 0      | 0      | 0      | 0.29   | 3.36   | 0.14   |
| GAIF01032508.1 | 0.22   | 0.09   | 0.09   | 1.98   | 7.67   | 0.36   |
| GAIF01032509.1 | 0.04   | 0      | 0      | 0      | 0      | 0      |
| GAIF01032510.1 | 0.53   | 0      | 0      | 0      | 0.86   | 2.93   |
| GAIF01032511.1 | 0      | 0.6    | 1.05   | 0      | 0      | 2.54   |
| GAIF01032512.1 | 16.99  | 18.53  | 11.84  | 37.6   | 23.02  | 3.5    |
| GAIF01032513.1 | 0.63   | 0      | 1.85   | 0      | 0      | 0      |
| GAIF01032515.1 | 10.45  | 9.01   | 15.21  | 25.79  | 11.45  | 25.94  |
| GAIF01032516.1 | 0.07   | 0.08   | 0      | 0.1    | 0.05   | 0      |
| GAIF01032518.1 | 0      | 0      | 0      | 0.13   | 0      | 0      |
| GAIF01032519.1 | 0      | 0      | 0.11   | 0      | 0      | 0      |
| GAIF01032520.1 | 0.06   | 0.07   | 0      | 2.17   | 9.63   | 0.07   |
| GAIF01032521.1 | 34.59  | 42.91  | 58.7   | 97     | 45.12  | 35.69  |
| GAIF01032522.1 | 24.05  | 17.66  | 11.95  | 157.32 | 77.49  | 28.13  |
| GAIF01032523.1 | 18.06  | 14.85  | 21.72  | 2.14   | 25.5   | 9.84   |
| GAIF01032524.1 | 0      | 0      | 0      | 0      | 0.7    | 0      |
| GAIF01032525.1 | 0      | 0      | 0.68   | 0      | 0.51   | 0      |
| GAIF01032526.1 | 12.3   | 13.03  | 9.84   | 33.24  | 17.6   | 3.47   |
| GAIF01032527.1 | 249.59 | 114.37 | 325.98 | 210.21 | 31.49  | 135.54 |
| GAIF01032529.1 | 0      | 0      | 0      | 0.23   | 0      | 0      |
| GAIF01032530.1 | 6.66   | 14.42  | 4.57   | 57.32  | 66.87  | 2.19   |
| GAIF01032531.1 | 23.42  | 15.45  | 12.48  | 48.96  | 36.47  | 7.18   |
| GAIF01032532.1 | 535.1  | 404.35 | 354.25 | 175.19 | 118.27 | 264.8  |
| GAIF01032534.1 | 0.15   | 0.04   | 0.2    | 0.09   | 0.31   | 0      |
| GAIF01032536.1 | 0.69   | 0      | 0      | 0.6    | 2.5    | 0.89   |
| GAIF01032537.1 | 0.02   | 0.04   | 0      | 0.05   | 0.12   | 0      |
| GAIF01032538.1 | 0      | 0      | 0      | 0      | 0.27   | 0      |
| GAIF01032539.1 | 0      | 6.9    | 0.81   | 1.82   | 12.82  | 0.64   |
| GAIF01032541.1 | 0.52   | 0.14   | 0      | 13.99  | 24.64  | 9.57   |
| GAIF01032543.1 | 1.68   | 3.97   | 1      | 3.01   | 3.35   | 0.26   |
| GAIF01032544.1 | 2.17   | 1.18   | 1.31   | 5.28   | 10.67  | 0.95   |
| GAIF01032545.1 | 38.42  | 27.39  | 28.04  | 70.43  | 78.8   | 31.71  |
| GAIF01032547.1 | 0      | 0      | 0      | 0.39   | 2.6    | 0      |
| GAIF01032548.1 | 0      | 0      | 0      | 0.17   | 0.62   | 0      |
| GAIF01032550.1 | 3.83   | 2.32   | 2.02   | 2.53   | 1.86   | 0.21   |
| GAIF01032551.1 | 0.02   | 0.05   | 0      | 0.16   | 0.87   | 0      |
| GAIF01032552.1 | 0.08   | 0      | 0.25   | 0.1    | 0      | 0      |
| GAIF01032553.1 | 0      | 0      | 0      | 0.28   | 0      | 0      |
| GAIF01032554.1 | 10.8   | 16.92  | 6.42   | 50.29  | 59.82  | 1.34   |
| GAIF01032555.1 | 0      | 0.06   | 0.06   | 0.33   | 0.83   | 0.19   |
| GAIF01032556.1 | 8.97   | 7.96   | 10.19  | 41.25  | 21.34  | 6.82   |
| GAIF01032557.1 | 50.68  | 27.12  | 24.59  | 41.12  | 88.84  | 375.72 |
| GAIF01032558.1 | 0      | 0.06   | 0      | 0      | 0.07   | 0      |
| GAIF01032560.1 | 16     | 6.86   | 5.8    | 5.39   | 3.29   | 8.01   |

|                |        |        |        |        |        |        |
|----------------|--------|--------|--------|--------|--------|--------|
| GAIF01032561.1 | 19.88  | 16.68  | 14.3   | 16.13  | 5.57   | 1.91   |
| GAIF01032562.1 | 0      | 0      | 0      | 0.02   | 0.02   | 0      |
| GAIF01032563.1 | 2.11   | 4.73   | 0.85   | 8.29   | 9.87   | 0      |
| GAIF01032564.1 | 0.17   | 0      | 0      | 0.12   | 0.84   | 0      |
| GAIF01032565.1 | 0.05   | 0      | 0      | 0.38   | 1.3    | 0      |
| GAIF01032567.1 | 0.57   | 0.61   | 0.52   | 0.55   | 0.57   | 0.31   |
| GAIF01032568.1 | 0.18   | 0.14   | 0      | 0.12   | 1.41   | 0.45   |
| GAIF01032572.1 | 2.94   | 2.5    | 3.63   | 5.17   | 4.29   | 0.76   |
| GAIF01032573.1 | 0      | 0.57   | 1.91   | 0      | 0      | 4.21   |
| GAIF01032574.1 | 10.91  | 7.91   | 6.44   | 6.43   | 1.39   | 2.28   |
| GAIF01032575.1 | 0.12   | 0      | 0      | 0.14   | 0.79   | 0      |
| GAIF01032577.1 | 1.32   | 3.39   | 8.82   | 0.56   | 1.44   | 8.72   |
| GAIF01032578.1 | 0.03   | 0.07   | 0      | 0      | 0.04   | 0      |
| GAIF01032579.1 | 1.66   | 2.92   | 2.38   | 1.78   | 0.61   | 0.56   |
| GAIF01032580.1 | 0.14   | 0.01   | 0.01   | 0.12   | 0.12   | 0.15   |
| GAIF01032582.1 | 0      | 7.1    | 12.21  | 0      | 0      | 1.52   |
| GAIF01032584.1 | 103.49 | 67.16  | 129.18 | 7      | 2.6    | 6.87   |
| GAIF01032588.1 | 0      | 0      | 0.14   | 0      | 0      | 0      |
| GAIF01032590.1 | 0      | 0      | 0.04   | 0      | 0      | 0      |
| GAIF01032592.1 | 81.51  | 90.59  | 47.3   | 98.27  | 67.19  | 26.52  |
| GAIF01032593.1 | 0.08   | 0.04   | 0      | 0.55   | 1.61   | 0.09   |
| GAIF01032595.1 | 0.41   | 0.06   | 0.05   | 0      | 0.07   | 0.03   |
| GAIF01032597.1 | 0      | 0      | 0      | 0      | 0.13   | 0      |
| GAIF01032598.1 | 0.57   | 0      | 0      | 2.66   | 7.57   | 0.32   |
| GAIF01032599.1 | 158.66 | 130.29 | 57.37  | 222.08 | 162.02 | 36.48  |
| GAIF01032600.1 | 0.12   | 0.13   | 0      | 1.44   | 3.28   | 0.82   |
| GAIF01032602.1 | 22.47  | 12.67  | 9.65   | 59.96  | 58.93  | 13.2   |
| GAIF01032603.1 | 0      | 0      | 0      | 0.36   | 3.21   | 0      |
| GAIF01032604.1 | 0.03   | 0.05   | 0.07   | 0.59   | 3.26   | 0.12   |
| GAIF01032605.1 | 4.05   | 3.49   | 2.96   | 2.18   | 4.05   | 2.63   |
| GAIF01032606.1 | 0      | 0      | 0      | 0.08   | 1.57   | 0.16   |
| GAIF01032608.1 | 118.82 | 143.28 | 198.84 | 258.52 | 117.2  | 154.95 |
| GAIF01032609.1 | 1.23   | 0.54   | 0.17   | 9.52   | 28.05  | 12.64  |
| GAIF01032610.1 | 2.73   | 3.1    | 0.31   | 3.56   | 19.79  | 7.79   |
| GAIF01032612.1 | 8.08   | 3.2    | 1.29   | 17.39  | 23.44  | 10.8   |
| GAIF01032614.1 | 0      | 0      | 0      | 0.18   | 0.18   | 0      |
| GAIF01032615.1 | 0.88   | 0.19   | 0.13   | 2.79   | 4.86   | 6.52   |
| GAIF01032616.1 | 0.79   | 0.51   | 0.69   | 0.46   | 2.57   | 4.37   |
| GAIF01032617.1 | 0.04   | 0      | 0      | 0      | 0.09   | 0      |
| GAIF01032619.1 | 0      | 0.89   | 0      | 0      | 0      | 0      |
| GAIF01032620.1 | 0.23   | 0.13   | 0.13   | 0.04   | 1.06   | 0      |
| GAIF01032621.1 | 14.25  | 19.83  | 7.7    | 50.91  | 37.29  | 1.19   |
| GAIF01032622.1 | 0.01   | 7.19   | 1.6    | 0.1    | 21.59  | 0.82   |
| GAIF01032625.1 | 214.83 | 128.16 | 151.93 | 271.25 | 855.62 | 533.88 |

|                |       |       |        |        |        |       |
|----------------|-------|-------|--------|--------|--------|-------|
| GAIF01032627.1 | 0.21  | 0.04  | 0      | 0.32   | 1.62   | 0.27  |
| GAIF01032628.1 | 44.6  | 30.56 | 28.87  | 45.18  | 47.84  | 60.54 |
| GAIF01032629.1 | 84.41 | 16.63 | 9.31   | 61.13  | 100.25 | 4.19  |
| GAIF01032630.1 | 0.12  | 0     | 0      | 0      | 0.64   | 0     |
| GAIF01032631.1 | 0.61  | 0.08  | 0.58   | 5.79   | 31.56  | 0.5   |
| GAIF01032632.1 | 0.09  | 0.2   | 0      | 1.1    | 7.04   | 0.08  |
| GAIF01032637.1 | 0     | 0.17  | 0.18   | 0      | 0      | 0.09  |
| GAIF01032638.1 | 22.07 | 34.64 | 20.55  | 69.13  | 59.78  | 6.12  |
| GAIF01032639.1 | 0.22  | 0     | 0      | 2.32   | 6.41   | 3.55  |
| GAIF01032640.1 | 0.04  | 0     | 0      | 0      | 0      | 0     |
| GAIF01032641.1 | 0     | 0     | 0      | 0      | 0.13   | 0     |
| GAIF01032642.1 | 0     | 0     | 0      | 0.24   | 0.76   | 0     |
| GAIF01032644.1 | 0.25  | 0.03  | 0.74   | 0.12   | 0.07   | 0.34  |
| GAIF01032645.1 | 18.24 | 12.45 | 5.4    | 33.2   | 36.82  | 7.34  |
| GAIF01032646.1 | 1.12  | 0.17  | 0.18   | 0.19   | 0.19   | 0.53  |
| GAIF01032647.1 | 0.85  | 0.12  | 0      | 0.79   | 7.25   | 0.93  |
| GAIF01032650.1 | 0     | 0.21  | 0      | 0      | 0      | 0     |
| GAIF01032651.1 | 0.92  | 0.08  | 3.72   | 3.6    | 1.36   | 9.17  |
| GAIF01032653.1 | 114.5 | 47.33 | 48.86  | 190.16 | 73     | 8.88  |
| GAIF01032654.1 | 0     | 6.92  | 4.42   | 0      | 0      | 0.72  |
| GAIF01032655.1 | 25.15 | 14.06 | 14.59  | 38.88  | 41.32  | 8.58  |
| GAIF01032656.1 | 0.22  | 0.24  | 0.06   | 0.51   | 2.32   | 0.12  |
| GAIF01032657.1 | 0     | 0.11  | 0      | 0.82   | 0.97   | 0.22  |
| GAIF01032659.1 | 1.56  | 2.17  | 0.41   | 4.25   | 7.31   | 0.47  |
| GAIF01032662.1 | 12.58 | 7.47  | 3      | 35.82  | 57.9   | 1.33  |
| GAIF01032663.1 | 6.03  | 4.04  | 3.46   | 13.08  | 16.94  | 11.45 |
| GAIF01032664.1 | 0.73  | 1.14  | 1.57   | 1.09   | 1.17   | 0.72  |
| GAIF01032668.1 | 6.84  | 15.28 | 9.43   | 34.4   | 53.39  | 18.57 |
| GAIF01032669.1 | 104.9 | 97.85 | 107.72 | 91.07  | 54.81  | 35.84 |
| GAIF01032670.1 | 0.08  | 0     | 0      | 0.45   | 2.04   | 0     |
| GAIF01032671.1 | 0     | 0     | 0      | 0      | 0.11   | 0     |
| GAIF01032672.1 | 9.14  | 3.89  | 0.65   | 31.76  | 40.15  | 4.84  |
| GAIF01032673.1 | 4.55  | 4.95  | 2.44   | 1.87   | 0.6    | 0.12  |
| GAIF01032674.1 | 0     | 0     | 0      | 0.16   | 1.02   | 0     |
| GAIF01032675.1 | 3.82  | 8.47  | 2.64   | 1.81   | 3.4    | 2.03  |
| GAIF01032676.1 | 0     | 0.04  | 0      | 0      | 0      | 0     |
| GAIF01032677.1 | 0     | 0     | 0      | 1.71   | 4.52   | 0.74  |
| GAIF01032678.1 | 4.16  | 1.12  | 4.57   | 4.48   | 10.2   | 2.09  |
| GAIF01032679.1 | 0.13  | 0.09  | 0.18   | 0.15   | 0      | 0.14  |
| GAIF01032680.1 | 0.05  | 0     | 0      | 0      | 0.12   | 0     |
| GAIF01032681.1 | 0.16  | 0.32  | 0      | 0.06   | 1.74   | 0     |
| GAIF01032682.1 | 0.67  | 0.44  | 0.15   | 1.24   | 0.97   | 0     |
| GAIF01032683.1 | 0.34  | 0     | 0      | 2.04   | 4.15   | 0     |
| GAIF01032684.1 | 0     | 3.3   | 4.61   | 0      | 0      | 0.96  |

|                |        |        |        |        |        |       |
|----------------|--------|--------|--------|--------|--------|-------|
| GAIF01032686.1 | 44.31  | 40.8   | 31.58  | 53.79  | 55.82  | 8.36  |
| GAIF01032688.1 | 0      | 0.1    | 0      | 0      | 0.32   | 0     |
| GAIF01032690.1 | 0      | 0      | 0      | 0      | 0.65   | 0     |
| GAIF01032691.1 | 0.88   | 0.41   | 0.27   | 1.35   | 7.84   | 1.11  |
| GAIF01032692.1 | 4.8    | 16.1   | 11.19  | 17.02  | 17.92  | 1.9   |
| GAIF01032693.1 | 116.88 | 121.54 | 62.31  | 470.03 | 287.14 | 26.69 |
| GAIF01032694.1 | 0.45   | 0.16   | 0      | 0.7    | 2.73   | 0.17  |
| GAIF01032695.1 | 0      | 0      | 0      | 0.09   | 0.19   | 0     |
| GAIF01032697.1 | 10.16  | 8.24   | 6.43   | 5.4    | 0.41   | 0.95  |
| GAIF01032698.1 | 6.71   | 4.24   | 0.46   | 27.78  | 62.25  | 0     |
| GAIF01032699.1 | 90.21  | 185.48 | 164.49 | 172.4  | 111.33 | 22.23 |
| GAIF01032701.1 | 1.39   | 0.15   | 0.38   | 0.72   | 0.33   | 0     |
| GAIF01032702.1 | 0.92   | 0.42   | 0.39   | 0.63   | 4.63   | 0     |
| GAIF01032704.1 | 0      | 0      | 0      | 1.36   | 1.35   | 0     |
| GAIF01032706.1 | 0      | 0      | 30.67  | 0      | 0      | 0     |
| GAIF01032707.1 | 11.58  | 13.03  | 11.18  | 1.7    | 1.24   | 0.32  |
| GAIF01032708.1 | 0.08   | 0      | 0      | 0.59   | 1.01   | 0     |
| GAIF01032710.1 | 0.06   | 0      | 0      | 0.07   | 0.03   | 0     |
| GAIF01032711.1 | 3.46   | 2.53   | 3.27   | 0.76   | 0.26   | 1.11  |
| GAIF01032713.1 | 1.44   | 0      | 0      | 0      | 0.37   | 0     |
| GAIF01032716.1 | 0.38   | 0.52   | 0      | 1.88   | 8.92   | 1.05  |
| GAIF01032718.1 | 0      | 0.12   | 0.12   | 0.38   | 2.11   | 0.12  |
| GAIF01032719.1 | 1.91   | 0.49   | 0      | 4.23   | 3.81   | 1.4   |
| GAIF01032720.1 | 7.76   | 7.21   | 5.01   | 1.31   | 0.62   | 0.16  |
| GAIF01032724.1 | 0      | 0      | 0      | 0.18   | 0.82   | 0     |
| GAIF01032727.1 | 2.34   | 0      | 7.68   | 0      | 0.78   | 0     |
| GAIF01032728.1 | 14.08  | 0.07   | 0      | 26.21  | 11.34  | 2.76  |
| GAIF01032730.1 | 7.15   | 8.57   | 5      | 22.45  | 17.78  | 3.33  |
| GAIF01032731.1 | 26.24  | 15.77  | 12.03  | 11.77  | 8.91   | 17.27 |
| GAIF01032733.1 | 0.09   | 0      | 0      | 0.05   | 0.22   | 0.05  |
| GAIF01032734.1 | 0      | 0      | 0      | 0      | 1.36   | 0     |
| GAIF01032735.1 | 0      | 0.35   | 0      | 1.25   | 2.65   | 0     |
| GAIF01032737.1 | 0.76   | 0.31   | 0.31   | 2.22   | 13.66  | 0.42  |
| GAIF01032739.1 | 2.52   | 0      | 0      | 6.58   | 36.09  | 3.85  |
| GAIF01032740.1 | 0.18   | 0      | 0      | 0      | 0.43   | 0     |
| GAIF01032742.1 | 1.02   | 2.7    | 0.43   | 8.46   | 13.03  | 0.07  |
| GAIF01032743.1 | 10.28  | 6.13   | 8.38   | 17.9   | 15.36  | 8.06  |
| GAIF01032744.1 | 4.42   | 8.44   | 5.43   | 32.71  | 43.32  | 1.91  |
| GAIF01032745.1 | 0.6    | 0.16   | 0      | 7.1    | 37.5   | 1.15  |
| GAIF01032746.1 | 0      | 0      | 0.15   | 0.43   | 2.84   | 0.25  |
| GAIF01032748.1 | 33.61  | 49.29  | 45.7   | 89.54  | 48.19  | 21.75 |
| GAIF01032749.1 | 0.21   | 0      | 0      | 0.98   | 1.33   | 0     |
| GAIF01032750.1 | 22.04  | 18.85  | 23.74  | 38.81  | 26.15  | 47.21 |
| GAIF01032751.1 | 10.36  | 11.33  | 3.37   | 4.05   | 3.04   | 0.26  |

|                |        |        |        |        |         |        |
|----------------|--------|--------|--------|--------|---------|--------|
| GAIF01032752.1 | 0.09   | 0      | 0      | 0      | 0.55    | 0      |
| GAIF01032753.1 | 0.1    | 0      | 0      | 0.12   | 0.18    | 0      |
| GAIF01032755.1 | 0.38   | 0.21   | 0      | 1.1    | 1.14    | 0.21   |
| GAIF01032757.1 | 0.7    | 0.57   | 0      | 1.62   | 8.58    | 0.19   |
| GAIF01032758.1 | 20.25  | 14.79  | 29.51  | 66.29  | 0       | 25.05  |
| GAIF01032759.1 | 0.78   | 0      | 0      | 1.99   | 1.87    | 0.17   |
| GAIF01032761.1 | 0.12   | 0.22   | 0.04   | 0.56   | 1.21    | 0      |
| GAIF01032762.1 | 17.02  | 39.95  | 14.4   | 42.98  | 51.16   | 6.6    |
| GAIF01032763.1 | 0.45   | 0.1    | 0      | 0.48   | 0.88    | 0.17   |
| GAIF01032765.1 | 3.46   | 2.83   | 1.82   | 4.37   | 7.4     | 0.66   |
| GAIF01032766.1 | 4.5    | 3.63   | 4.3    | 14.99  | 9.25    | 5.76   |
| GAIF01032767.1 | 187.65 | 141.61 | 34.92  | 0      | 0.47    | 0      |
| GAIF01032768.1 | 0      | 0      | 0      | 0.04   | 0       | 0      |
| GAIF01032770.1 | 0      | 0      | 0      | 0.11   | 2.12    | 0.31   |
| GAIF01032771.1 | 0      | 0      | 0      | 0.15   | 1.11    | 0      |
| GAIF01032775.1 | 0      | 0.28   | 0      | 0.29   | 4.13    | 0      |
| GAIF01032776.1 | 1.23   | 0.24   | 0.08   | 6.3    | 19.89   | 0.43   |
| GAIF01032777.1 | 0      | 0      | 0      | 0.21   | 0.33    | 0      |
| GAIF01032778.1 | 0.43   | 0.31   | 0.14   | 0.2    | 0.1     | 0      |
| GAIF01032779.1 | 537.5  | 469.73 | 492.77 | 99.08  | 58.7    | 50.63  |
| GAIF01032780.1 | 0.07   | 0      | 0      | 0      | 0.18    | 0      |
| GAIF01032781.1 | 0      | 7.04   | 6.45   | 0      | 0       | 1.31   |
| GAIF01032782.1 | 14.07  | 11.81  | 10.86  | 26.51  | 37.36   | 13.82  |
| GAIF01032783.1 | 0.46   | 0      | 0      | 2.16   | 12.29   | 0.26   |
| GAIF01032784.1 | 0.12   | 0      | 0      | 0      | 0.62    | 0      |
| GAIF01032787.1 | 5.09   | 3.18   | 2.46   | 3.11   | 1.87    | 1.45   |
| GAIF01032788.1 | 2.47   | 3.28   | 4.85   | 5.95   | 2.68    | 1.7    |
| GAIF01032791.1 | 0.06   | 0      | 0      | 0.14   | 0.42    | 0      |
| GAIF01032792.1 | 4.52   | 8.53   | 2.15   | 6.93   | 11.02   | 3.75   |
| GAIF01032795.1 | 0      | 0      | 0      | 0      | 0.04    | 0      |
| GAIF01032796.1 | 0      | 0      | 0      | 0.87   | 0.38    | 0      |
| GAIF01032797.1 | 5.12   | 4.32   | 4.71   | 7.65   | 3.14    | 2.77   |
| GAIF01032798.1 | 0      | 0      | 0      | 0.19   | 0.19    | 0      |
| GAIF01032799.1 | 56.14  | 71.24  | 66.78  | 59.07  | 56.65   | 29.95  |
| GAIF01032800.1 | 0.09   | 0      | 0      | 0.9    | 0.83    | 1.51   |
| GAIF01032801.1 | 0.91   | 1.31   | 0      | 1.54   | 1.59    | 0      |
| GAIF01032802.1 | 0      | 0      | 0.12   | 0      | 0       | 0      |
| GAIF01032803.1 | 0      | 0      | 0      | 0      | 0.3     | 0      |
| GAIF01032804.1 | 2.82   | 1.79   | 0      | 9.53   | 38.1    | 1.03   |
| GAIF01032805.1 | 766.98 | 516.89 | 259.25 | 3976   | 3246.02 | 302.7  |
| GAIF01032808.1 | 86.67  | 40.17  | 74.33  | 178.25 | 252.92  | 149.95 |
| GAIF01032810.1 | 0      | 0      | 0      | 0      | 0.06    | 0      |
| GAIF01032811.1 | 4.66   | 10.34  | 2.51   | 18.79  | 15.73   | 0.2    |
| GAIF01032812.1 | 0      | 0.06   | 0      | 0.24   | 3.94    | 0      |

|                |       |        |        |        |        |        |
|----------------|-------|--------|--------|--------|--------|--------|
| GAIF01032814.1 | 38.33 | 3.01   | 5.67   | 7.41   | 3.78   | 28.68  |
| GAIF01032815.1 | 4.15  | 9.89   | 7.51   | 5.48   | 7.32   | 2.43   |
| GAIF01032819.1 | 0     | 0      | 0      | 0      | 0.4    | 0      |
| GAIF01032823.1 | 0     | 0.23   | 0      | 0      | 0      | 0      |
| GAIF01032826.1 | 1.34  | 0.15   | 0      | 0.31   | 12.44  | 0      |
| GAIF01032827.1 | 35.49 | 33.17  | 28.58  | 86.5   | 106.82 | 25     |
| GAIF01032830.1 | 0     | 0      | 0      | 0      | 0.54   | 0      |
| GAIF01032832.1 | 0     | 0      | 0      | 0      | 0.9    | 0      |
| GAIF01032833.1 | 0.62  | 0.27   | 0.26   | 0.08   | 0      | 0      |
| GAIF01032836.1 | 17.2  | 29.47  | 18.13  | 51.15  | 24.93  | 8.66   |
| GAIF01032837.1 | 1.43  | 2.33   | 0.16   | 6.63   | 2.75   | 0      |
| GAIF01032838.1 | 13.44 | 18.5   | 14.16  | 50.75  | 44.38  | 5      |
| GAIF01032839.1 | 0.64  | 0.51   | 0.87   | 0.97   | 0.58   | 0.18   |
| GAIF01032840.1 | 0.23  | 0.19   | 0      | 0      | 0.56   | 0.33   |
| GAIF01032842.1 | 0     | 0      | 0      | 0      | 0.14   | 0      |
| GAIF01032843.1 | 0.53  | 0.77   | 0.78   | 0.74   | 1.1    | 0.36   |
| GAIF01032844.1 | 0.11  | 0.12   | 0.25   | 0.13   | 0.67   | 0      |
| GAIF01032846.1 | 93.46 | 108.57 | 103.74 | 70.39  | 67.99  | 124.58 |
| GAIF01032848.1 | 0     | 0      | 0.07   | 0.12   | 0.37   | 0.11   |
| GAIF01032852.1 | 295.8 | 171.92 | 120.77 | 239.62 | 247.29 | 456.39 |
| GAIF01032854.1 | 10.55 | 14.52  | 11.52  | 24.31  | 22.05  | 4.79   |
| GAIF01032855.1 | 16.24 | 21.69  | 32.67  | 27.07  | 17.94  | 22.8   |
| GAIF01032861.1 | 0.29  | 0      | 0      | 0.21   | 0.98   | 0      |
| GAIF01032862.1 | 47.33 | 66.45  | 76.5   | 69.38  | 65.21  | 83.88  |
| GAIF01032863.1 | 0.21  | 0      | 0      | 0.16   | 0.19   | 0      |
| GAIF01032864.1 | 54.02 | 37.66  | 30.83  | 51.99  | 55.64  | 85.22  |
| GAIF01032865.1 | 0     | 0      | 0      | 0.31   | 0.22   | 0.21   |
| GAIF01032870.1 | 44.04 | 52.76  | 42.79  | 48.6   | 33.9   | 22.32  |
| GAIF01032871.1 | 0.15  | 0.33   | 0.49   | 0.35   | 0.36   | 0.33   |
| GAIF01032872.1 | 52.45 | 136.79 | 103.64 | 95.62  | 37.84  | 53.54  |
| GAIF01032873.1 | 0.11  | 0.24   | 0.25   | 0      | 0      | 0.06   |
| GAIF01032874.1 | 5.2   | 6.06   | 3.6    | 21.71  | 22.65  | 1.39   |
| GAIF01032875.1 | 0     | 0      | 0      | 0.04   | 0.02   | 0      |
| GAIF01032876.1 | 59.81 | 80.71  | 70.39  | 65.9   | 48.83  | 30.45  |
| GAIF01032877.1 | 40.18 | 42.16  | 31.61  | 34.93  | 43.16  | 29.85  |
| GAIF01032878.1 | 76.71 | 33.33  | 15.03  | 96.03  | 56.7   | 7.99   |
| GAIF01032879.1 | 9.16  | 10.24  | 1.7    | 4.34   | 3.26   | 0      |
| GAIF01032880.1 | 5.28  | 3.3    | 1.6    | 18.66  | 20.96  | 15.24  |
| GAIF01032881.1 | 0     | 0      | 0      | 0.57   | 0      | 0.56   |
| GAIF01032882.1 | 0     | 0      | 0      | 0      | 0.04   | 0      |
| GAIF01032883.1 | 6.62  | 8.85   | 6.27   | 16.72  | 28     | 34.74  |
| GAIF01032884.1 | 122.2 | 147.61 | 111.55 | 105.03 | 80.21  | 106.48 |
| GAIF01032885.1 | 14.74 | 3.66   | 1.98   | 22.74  | 46.91  | 81.16  |
| GAIF01032886.1 | 10.7  | 5.26   | 1.45   | 17.71  | 20.47  | 0.59   |

|                |         |         |         |         |         |         |
|----------------|---------|---------|---------|---------|---------|---------|
| GAIF01032887.1 | 0       | 0.57    | 0.26    | 0       | 0       | 0.14    |
| GAIF01032888.1 | 0.04    | 0       | 0.01    | 0.43    | 3.16    | 0       |
| GAIF01032889.1 | 0       | 0.33    | 0.05    | 0       | 0       | 0       |
| GAIF01032891.1 | 1.87    | 3.84    | 4.31    | 19.37   | 19.48   | 1.3     |
| GAIF01032893.1 | 0       | 0.03    | 0       | 0       | 0       | 0       |
| GAIF01032895.1 | 0.81    | 0.76    | 0.86    | 0.54    | 0       | 0.48    |
| GAIF01032897.1 | 0       | 0.03    | 0       | 0       | 0       | 0       |
| GAIF01032898.1 | 4.09    | 4.57    | 2.51    | 3.63    | 2.17    | 0.26    |
| GAIF01032899.1 | 7.25    | 6.84    | 4.31    | 2.49    | 1.16    | 0.33    |
| GAIF01032900.1 | 0.31    | 0.23    | 0       | 0.84    | 7.24    | 0.11    |
| GAIF01032901.1 | 0       | 0       | 0       | 0       | 0.08    | 0       |
| GAIF01032902.1 | 25.41   | 54.33   | 41.96   | 68.73   | 74.95   | 7.58    |
| GAIF01032903.1 | 0.07    | 0       | 0       | 0       | 0       | 0       |
| GAIF01032904.1 | 10.12   | 14.22   | 12.18   | 28.62   | 23.9    | 4.17    |
| GAIF01032905.1 | 304.46  | 153.18  | 110.46  | 607.96  | 1274.32 | 88.59   |
| GAIF01032906.1 | 0       | 0       | 0       | 0.15    | 0       | 0       |
| GAIF01032907.1 | 241.24  | 25.47   | 27.34   | 299.57  | 510.17  | 4316.36 |
| GAIF01032909.1 | 12.47   | 7.57    | 3.79    | 6.08    | 2.63    | 1.83    |
| GAIF01032910.1 | 3137.82 | 2661.39 | 2124.23 | 1896.63 | 1773.03 | 4997.19 |
| GAIF01032912.1 | 0       | 0       | 0       | 0.18    | 0.47    | 0       |
| GAIF01032913.1 | 370.06  | 438.6   | 329.1   | 106.19  | 59.54   | 79.83   |
| GAIF01032916.1 | 0       | 0       | 0       | 0.54    | 2.66    | 0.1     |
| GAIF01032917.1 | 14.21   | 20.56   | 19.14   | 36.99   | 30.57   | 8.98    |
| GAIF01032918.1 | 0       | 0       | 0.39    | 0.12    | 0.12    | 0       |
| GAIF01032921.1 | 10.74   | 5.26    | 6.83    | 16.19   | 17.13   | 8.56    |
| GAIF01032922.1 | 22.95   | 1.51    | 1.64    | 28.82   | 4.02    | 5.94    |
| GAIF01032923.1 | 0       | 0       | 0       | 0       | 0.17    | 0       |
| GAIF01032924.1 | 0       | 0       | 0       | 0.15    | 0       | 0       |
| GAIF01032925.1 | 0.6     | 0.6     | 0.38    | 0.41    | 0.24    | 0.22    |
| GAIF01032928.1 | 16.5    | 26.1    | 18.6    | 41.71   | 30.08   | 6.41    |
| GAIF01032930.1 | 1.19    | 0       | 0.65    | 0.23    | 0.95    | 0       |
| GAIF01032932.1 | 0.17    | 0.37    | 0.46    | 1.28    | 2.95    | 0.19    |
| GAIF01032933.1 | 7.69    | 8.2     | 13.09   | 39.8    | 55.81   | 65.88   |
| GAIF01032934.1 | 0       | 0.22    | 0       | 0.49    | 2.23    | 0.44    |
| GAIF01032935.1 | 0       | 0       | 0       | 0       | 0.52    | 0       |
| GAIF01032936.1 | 1.18    | 2.31    | 0.43    | 7.03    | 7.85    | 0.43    |
| GAIF01032937.1 | 0       | 0.29    | 0       | 0       | 0       | 0       |
| GAIF01032938.1 | 2.3     | 0.17    | 0.17    | 12.5    | 44.19   | 4.74    |
| GAIF01032939.1 | 0.32    | 0.69    | 0.35    | 0       | 0.19    | 0       |
| GAIF01032941.1 | 0       | 0       | 0.06    | 0.74    | 0.09    | 0       |
| GAIF01032942.1 | 0.06    | 0       | 0       | 0       | 0.46    | 0.21    |
| GAIF01032943.1 | 17.01   | 10.63   | 12.9    | 9.54    | 2.21    | 2.27    |
| GAIF01032944.1 | 5.33    | 8.36    | 6.19    | 1.9     | 2.1     | 0.57    |
| GAIF01032948.1 | 3.59    | 5.66    | 1.43    | 10.71   | 9.31    | 0.34    |



|                |        |       |       |        |        |        |
|----------------|--------|-------|-------|--------|--------|--------|
| GAIF01032949.1 | 4.63   | 3.65  | 5.73  | 0.47   | 0.05   | 0      |
| GAIF01032950.1 | 0.15   | 0     | 0     | 0      | 0      | 0      |
| GAIF01032952.1 | 0.68   | 0     | 0.87  | 0.25   | 0.56   | 0      |
| GAIF01032953.1 | 0      | 0     | 0     | 0      | 0.17   | 0      |
| GAIF01032954.1 | 14.49  | 7.07  | 14.7  | 11.14  | 4.96   | 5.04   |
| GAIF01032955.1 | 0.56   | 0.17  | 0.31  | 1.55   | 3.88   | 0.65   |
| GAIF01032956.1 | 28.43  | 21.55 | 5.31  | 76.63  | 86.26  | 3.87   |
| GAIF01032961.1 | 0      | 0     | 0.15  | 0      | 0      | 0      |
| GAIF01032964.1 | 1.29   | 0.77  | 0.6   | 1.45   | 19.08  | 5.15   |
| GAIF01032966.1 | 16.88  | 29.75 | 24.54 | 88.91  | 48.02  | 6.8    |
| GAIF01032968.1 | 0.04   | 0     | 0     | 0.3    | 0.62   | 0      |
| GAIF01032969.1 | 0.21   | 0     | 0     | 0      | 0.07   | 0      |
| GAIF01032972.1 | 0      | 0     | 0.03  | 0      | 0      | 0      |
| GAIF01032973.1 | 0.2    | 0.32  | 0     | 2.53   | 0.12   | 0      |
| GAIF01032974.1 | 0.4    | 0     | 0     | 2.03   | 8.42   | 0.15   |
| GAIF01032975.1 | 10.81  | 6.68  | 2.71  | 24.41  | 40.56  | 3.25   |
| GAIF01032976.1 | 0      | 0     | 0     | 0      | 1.47   | 0.37   |
| GAIF01032977.1 | 0.07   | 0     | 0     | 0.65   | 1.52   | 0      |
| GAIF01032979.1 | 0      | 0     | 0     | 0.09   | 0      | 0      |
| GAIF01032980.1 | 0.23   | 0.13  | 0.26  | 1.63   | 2.39   | 0.26   |
| GAIF01032981.1 | 432.06 | 84.12 | 69.34 | 240    | 73.93  | 46.56  |
| GAIF01032983.1 | 0      | 0     | 0     | 0.15   | 0.46   | 0.07   |
| GAIF01032985.1 | 132.28 | 69.24 | 50.18 | 152.73 | 160.22 | 538.84 |
| GAIF01032987.1 | 19.89  | 23.25 | 10.61 | 44.04  | 40.2   | 3.18   |
| GAIF01032988.1 | 0.09   | 0     | 0.09  | 0.1    | 0.21   | 0      |
| GAIF01032989.1 | 0.27   | 0.3   | 0.99  | 0.68   | 2.11   | 0.17   |
| GAIF01032990.1 | 0.2    | 0.65  | 0     | 1.85   | 0.84   | 0.22   |
| GAIF01032991.1 | 21.61  | 21.09 | 10.48 | 62.02  | 59.97  | 6.46   |
| GAIF01032992.1 | 0.44   | 0     | 0.69  | 0      | 0.38   | 0      |
| GAIF01032994.1 | 1.48   | 1.69  | 0     | 17.99  | 43.85  | 0.49   |
| GAIF01032995.1 | 0      | 0     | 0     | 0      | 0.01   | 0      |
| GAIF01032996.1 | 9.32   | 10.83 | 6.73  | 24.09  | 28.26  | 7.29   |
| GAIF01032997.1 | 7.95   | 6.08  | 0.16  | 0.29   | 0      | 0.07   |
| GAIF01032998.1 | 30.42  | 38.4  | 35.21 | 61.09  | 36.65  | 11.62  |
| GAIF01032999.1 | 38.91  | 39.98 | 22.09 | 40.14  | 21.32  | 6.73   |
| GAIF01033001.1 | 0      | 0     | 0     | 0      | 1.27   | 0      |
| GAIF01033003.1 | 1.09   | 1.08  | 0.44  | 0.46   | 1.32   | 0      |
| GAIF01033004.1 | 6.62   | 7.33  | 4.93  | 1.65   | 1.56   | 0.65   |
| GAIF01033005.1 | 9.27   | 6.91  | 1     | 3.39   | 1      | 0      |
| GAIF01033006.1 | 0      | 0.34  | 0     | 0.36   | 0.06   | 0      |
| GAIF01033007.1 | 0.06   | 0     | 0     | 0.59   | 1.69   | 0.25   |
| GAIF01033008.1 | 11.64  | 5     | 6.23  | 17.71  | 24.82  | 28.13  |
| GAIF01033010.1 | 26.56  | 19.07 | 12.81 | 0.73   | 0.38   | 0.35   |
| GAIF01033011.1 | 0.46   | 0     | 0     | 1.06   | 2.19   | 0.5    |

|                |        |        |       |        |        |        |
|----------------|--------|--------|-------|--------|--------|--------|
| GAIF01033013.1 | 0.21   | 0      | 0     | 0.64   | 0.69   | 0.46   |
| GAIF01033014.1 | 0.21   | 0      | 0.19  | 0.05   | 0      | 0.14   |
| GAIF01033015.1 | 10.18  | 5.48   | 10.66 | 22.96  | 19.53  | 71.31  |
| GAIF01033018.1 | 0      | 0      | 0     | 0      | 0.06   | 0      |
| GAIF01033019.1 | 13.24  | 6.16   | 9.45  | 1.46   | 0.26   | 0.39   |
| GAIF01033020.1 | 0      | 0.2    | 0     | 0.36   | 1.37   | 0      |
| GAIF01033021.1 | 0.19   | 0.33   | 0     | 0.04   | 0      | 0.08   |
| GAIF01033022.1 | 1.87   | 2.07   | 1.41  | 9.39   | 10.45  | 0.44   |
| GAIF01033023.1 | 28.91  | 32.99  | 20.95 | 204.07 | 194.26 | 24.91  |
| GAIF01033024.1 | 1.29   | 0.47   | 0.24  | 4.37   | 15.51  | 0.36   |
| GAIF01033025.1 | 0      | 0.14   | 0     | 0.17   | 0      | 0      |
| GAIF01033026.1 | 6.91   | 10.2   | 4.66  | 0.22   | 0.38   | 0      |
| GAIF01033028.1 | 5.28   | 3.42   | 2.81  | 11.83  | 18.86  | 7.58   |
| GAIF01033029.1 | 0.02   | 0      | 0     | 0      | 0.07   | 0.01   |
| GAIF01033030.1 | 0      | 0.09   | 0     | 0.89   | 4.21   | 0      |
| GAIF01033031.1 | 0      | 0.01   | 0     | 0.06   | 0.43   | 0      |
| GAIF01033032.1 | 0.16   | 0.09   | 0     | 0.85   | 6.74   | 0      |
| GAIF01033033.1 | 0.08   | 0      | 0     | 1.22   | 1.87   | 0      |
| GAIF01033034.1 | 2.4    | 2.72   | 3.07  | 14.27  | 9.38   | 1.98   |
| GAIF01033036.1 | 0.63   | 0.11   | 0.11  | 0.27   | 0.37   | 0.14   |
| GAIF01033037.1 | 2.54   | 4.22   | 0.44  | 19.25  | 27.66  | 0.25   |
| GAIF01033039.1 | 4.66   | 4.77   | 10.84 | 2.71   | 1.21   | 5.29   |
| GAIF01033040.1 | 73.82  | 47.87  | 38.26 | 12.98  | 5.8    | 2.47   |
| GAIF01033042.1 | 6.45   | 4.52   | 5.39  | 15.35  | 6.81   | 8.95   |
| GAIF01033044.1 | 1.4    | 0.49   | 0.2   | 5.69   | 17.25  | 0.1    |
| GAIF01033045.1 | 71.66  | 43.89  | 22.73 | 117.1  | 121.9  | 75.52  |
| GAIF01033046.1 | 1.37   | 1.08   | 0.27  | 0.43   | 1.2    | 2.2    |
| GAIF01033048.1 | 22.09  | 11.57  | 14.65 | 32.17  | 18.27  | 22.55  |
| GAIF01033050.1 | 0      | 0      | 0     | 0      | 5.03   | 0      |
| GAIF01033051.1 | 184.18 | 177.38 | 95.84 | 422.27 | 436.59 | 146.63 |
| GAIF01033052.1 | 0.63   | 0.1    | 0.06  | 6      | 20.91  | 0.23   |
| GAIF01033053.1 | 0.04   | 0.13   | 0.09  | 0      | 0      | 0      |
| GAIF01033054.1 | 9      | 6.43   | 2.46  | 13.13  | 8.33   | 1.64   |
| GAIF01033055.1 | 0      | 0      | 0     | 0      | 0      | 0.12   |
| GAIF01033056.1 | 7.96   | 13.06  | 12.34 | 23.68  | 21.05  | 3.31   |
| GAIF01033059.1 | 0.03   | 0      | 0     | 0.04   | 0.38   | 0      |
| GAIF01033060.1 | 0      | 0      | 0     | 0      | 2.98   | 0      |
| GAIF01033064.1 | 0.28   | 0.36   | 0.18  | 0.58   | 1.07   | 0.61   |
| GAIF01033065.1 | 2.66   | 3.81   | 3.97  | 0.74   | 0.26   | 0.23   |
| GAIF01033066.1 | 0.08   | 0      | 0     | 0      | 0      | 0      |
| GAIF01033067.1 | 8.9    | 5.39   | 3.5   | 34.18  | 65.53  | 18.66  |
| GAIF01033069.1 | 2.41   | 1.87   | 3.03  | 0      | 0      | 0      |
| GAIF01033070.1 | 2.12   | 0      | 0     | 5.57   | 36.88  | 1.09   |
| GAIF01033072.1 | 7.04   | 18.7   | 11.75 | 11.72  | 10.44  | 8.29   |

|                |         |          |         |         |         |         |
|----------------|---------|----------|---------|---------|---------|---------|
| GAIF01033074.1 | 0       | 0        | 0       | 0.14    | 0.1     | 0       |
| GAIF01033075.1 | 0       | 0        | 0       | 0.07    | 0       | 0       |
| GAIF01033077.1 | 88.16   | 81.24    | 84.72   | 66.36   | 53.66   | 46.38   |
| GAIF01033079.1 | 106.6   | 63.94    | 29.56   | 111.03  | 95.67   | 44.16   |
| GAIF01033081.1 | 30.25   | 11.29    | 5.62    | 4.84    | 3.38    | 0.49    |
| GAIF01033082.1 | 0.56    | 0.26     | 0       | 0.83    | 2.67    | 0.26    |
| GAIF01033083.1 | 0.15    | 0.08     | 0       | 1.21    | 4.05    | 0       |
| GAIF01033084.1 | 24.31   | 37.63    | 26.74   | 131.09  | 99.46   | 21.09   |
| GAIF01033085.1 | 0       | 0        | 0       | 9       | 0       | 7.02    |
| GAIF01033086.1 | 1.48    | 0.47     | 0.05    | 16.42   | 45.97   | 0.34    |
| GAIF01033087.1 | 0.05    | 0.13     | 0.25    | 0.07    | 0.25    | 0.06    |
| GAIF01033090.1 | 5.02    | 2.81     | 1.45    | 8.21    | 2.78    | 0.53    |
| GAIF01033091.1 | 1.55    | 0.56     | 0.09    | 1.9     | 6.21    | 0       |
| GAIF01033092.1 | 0.12    | 0        | 0       | 1.52    | 7.8     | 0.46    |
| GAIF01033093.1 | 0.53    | 0.21     | 0.25    | 4.32    | 113.15  | 22.17   |
| GAIF01033094.1 | 0       | 0        | 0       | 0.88    | 0       | 0       |
| GAIF01033095.1 | 0       | 0.87     | 0.44    | 0       | 0       | 0.06    |
| GAIF01033096.1 | 0.16    | 0.17     | 0.06    | 0.97    | 5.53    | 0       |
| GAIF01033097.1 | 0.07    | 0        | 0       | 0       | 0       | 0       |
| GAIF01033098.1 | 0.81    | 0.53     | 0       | 2.31    | 2.69    | 0       |
| GAIF01033099.1 | 0       | 4.77     | 7.71    | 0       | 12.69   | 0       |
| GAIF01033101.1 | 11.93   | 24.01    | 22.63   | 49.11   | 42.03   | 5.23    |
| GAIF01033102.1 | 0.51    | 0.55     | 0.72    | 1.1     | 2.1     | 0.08    |
| GAIF01033104.1 | 0.15    | 0.04     | 0.27    | 0.19    | 0.73    | 0       |
| GAIF01033105.1 | 0.46    | 0        | 0       | 0.86    | 4.13    | 0.39    |
| GAIF01033106.1 | 0       | 0.12     | 0.49    | 0.45    | 0.34    | 0       |
| GAIF01033107.1 | 0.54    | 0        | 0.3     | 0       | 0.33    | 0       |
| GAIF01033109.1 | 1.82    | 1.64     | 2.79    | 7.48    | 3.33    | 1.83    |
| GAIF01033110.1 | 53.38   | 74.54    | 82.98   | 66.73   | 41.17   | 35.69   |
| GAIF01033112.1 | 3       | 7.3      | 0.29    | 13.64   | 40.07   | 0.19    |
| GAIF01033113.1 | 0.03    | 0.03     | 0       | 0.09    | 0.36    | 0.03    |
| GAIF01033115.1 | 25.73   | 13.07    | 10.67   | 1.01    | 0.37    | 0.56    |
| GAIF01033116.1 | 0       | 0.02     | 0       | 0       | 0.32    | 0       |
| GAIF01033117.1 | 5819.41 | 10827.75 | 7036.54 | 3409.97 | 5517.41 | 5891.88 |
| GAIF01033118.1 | 30.37   | 9.9      | 5.68    | 36.21   | 40.91   | 2.14    |
| GAIF01033120.1 | 0.49    | 0        | 0.31    | 2.04    | 13.71   | 0       |
| GAIF01033122.1 | 10.21   | 10.27    | 10.09   | 16.88   | 15.65   | 2.81    |
| GAIF01033123.1 | 7.6     | 5.33     | 7.52    | 24.03   | 14.26   | 13.56   |
| GAIF01033125.1 | 0.04    | 0.08     | 0.04    | 0.69    | 3.46    | 0.91    |
| GAIF01033126.1 | 3.04    | 2.73     | 2.52    | 4.8     | 7.6     | 0.12    |
| GAIF01033127.1 | 1.28    | 2.46     | 0.58    | 4.54    | 6.16    | 0       |
| GAIF01033128.1 | 0       | 0        | 0       | 0       | 0       | 0.05    |
| GAIF01033129.1 | 0       | 0.14     | 0       | 0       | 0.78    | 0       |
| GAIF01033131.1 | 42.48   | 0.77     | 0.56    | 3.29    | 2.43    | 11.82   |

|                |        |        |        |         |        |         |
|----------------|--------|--------|--------|---------|--------|---------|
| GAIF01033132.1 | 15.83  | 11.42  | 16.58  | 21.68   | 36.01  | 55.78   |
| GAIF01033133.1 | 8.04   | 7.12   | 1.37   | 7.11    | 8.33   | 0       |
| GAIF01033136.1 | 0      | 0      | 0      | 0.22    | 0      | 0       |
| GAIF01033137.1 | 7.84   | 0.03   | 0      | 0.01    | 0.21   | 0.05    |
| GAIF01033138.1 | 2.25   | 1.58   | 1.54   | 0.68    | 0.87   | 0.95    |
| GAIF01033139.1 | 2.47   | 0.96   | 0.19   | 13.3    | 39.43  | 0.78    |
| GAIF01033140.1 | 77.55  | 82.73  | 105.01 | 150.39  | 63.95  | 45.84   |
| GAIF01033141.1 | 52.45  | 0      | 38.39  | 0.96    | 0      | 0       |
| GAIF01033142.1 | 0      | 0.76   | 0.65   | 0       | 0      | 0.63    |
| GAIF01033143.1 | 0.01   | 0      | 0      | 0.27    | 0      | 0       |
| GAIF01033145.1 | 0.13   | 0.05   | 0.07   | 0.64    | 4.29   | 0.14    |
| GAIF01033146.1 | 1.35   | 0.68   | 1.16   | 1.64    | 2.33   | 0       |
| GAIF01033148.1 | 560.68 | 376.74 | 374.03 | 1378.91 | 818.79 | 1541.75 |
| GAIF01033149.1 | 0      | 0      | 0      | 2.57    | 7.51   | 0       |
| GAIF01033150.1 | 0      | 0      | 0      | 0       | 0      | 0.2     |
| GAIF01033151.1 | 11.71  | 7.5    | 2.49   | 18.61   | 20.25  | 1.61    |
| GAIF01033152.1 | 1.67   | 0      | 0.18   | 8.53    | 27.32  | 3.01    |
| GAIF01033153.1 | 0.13   | 0.41   | 0.14   | 0       | 0      | 0       |
| GAIF01033154.1 | 32.42  | 34.97  | 38.43  | 44.7    | 48.72  | 80.74   |
| GAIF01033155.1 | 0      | 0      | 0      | 0.06    | 0      | 0       |
| GAIF01033156.1 | 2.12   | 0.28   | 0.71   | 4.92    | 11.82  | 0.92    |
| GAIF01033157.1 | 0      | 0      | 0      | 0.02    | 0.24   | 0       |
| GAIF01033159.1 | 4.6    | 2.46   | 0      | 8.3     | 7.49   | 3.36    |
| GAIF01033160.1 | 11.91  | 9.02   | 7.21   | 20.78   | 22.72  | 5.34    |
| GAIF01033162.1 | 0.22   | 0.1    | 0.02   | 1.31    | 4.34   | 0.1     |
| GAIF01033163.1 | 232.17 | 56.04  | 70.19  | 201.76  | 220.26 | 745.36  |
| GAIF01033164.1 | 0.07   | 0      | 0      | 0.3     | 0      | 0.16    |
| GAIF01033165.1 | 0      | 0      | 0      | 0       | 0.38   | 0       |
| GAIF01033166.1 | 0      | 0      | 0.05   | 0       | 0      | 0       |
| GAIF01033167.1 | 0.14   | 0.23   | 0.24   | 0.5     | 0      | 0       |
| GAIF01033169.1 | 212.73 | 289.68 | 78.54  | 575.41  | 503.41 | 31.2    |
| GAIF01033170.1 | 0      | 0      | 0      | 0.16    | 0.09   | 0.15    |
| GAIF01033171.1 | 0      | 0      | 0      | 0       | 0.02   | 0       |
| GAIF01033173.1 | 4.38   | 1.13   | 0.1    | 7.91    | 35.03  | 12.64   |
| GAIF01033174.1 | 1.02   | 0.14   | 0.28   | 9.22    | 36.53  | 0.98    |
| GAIF01033175.1 | 0.22   | 0.2    | 0      | 1.71    | 7.96   | 1.15    |
| GAIF01033176.1 | 0      | 0      | 0      | 0.08    | 0.16   | 0       |
| GAIF01033178.1 | 0      | 0.11   | 0      | 4.02    | 11.2   | 0.11    |
| GAIF01033182.1 | 0.06   | 0      | 0      | 1.35    | 5.21   | 0.43    |
| GAIF01033183.1 | 3.39   | 5.96   | 0.95   | 6.15    | 13.48  | 0.27    |
| GAIF01033184.1 | 0      | 0      | 0      | 0       | 0.02   | 0       |
| GAIF01033186.1 | 4.4    | 12.2   | 12.74  | 23.85   | 22.8   | 1.1     |
| GAIF01033187.1 | 108.7  | 126.64 | 126.48 | 146.22  | 76.76  | 32.59   |
| GAIF01033188.1 | 12.68  | 20.49  | 24.17  | 32.4    | 17.16  | 9.71    |

|                |        |       |       |        |        |       |
|----------------|--------|-------|-------|--------|--------|-------|
| GAIF01033189.1 | 0.19   | 0.04  | 0.12  | 0.13   | 0.13   | 0     |
| GAIF01033191.1 | 0.43   | 0.23  | 0.24  | 1.41   | 4.74   | 0.39  |
| GAIF01033192.1 | 56.33  | 72.18 | 80.45 | 90.15  | 94.94  | 58.21 |
| GAIF01033193.1 | 0.07   | 0     | 0.08  | 0.24   | 1.18   | 0     |
| GAIF01033194.1 | 5.62   | 3.71  | 8.34  | 11.19  | 8.36   | 38.03 |
| GAIF01033196.1 | 0.6    | 0.09  | 0     | 1.5    | 7.06   | 1.43  |
| GAIF01033197.1 | 3.55   | 1.81  | 1.81  | 7.98   | 12.39  | 1.23  |
| GAIF01033198.1 | 1.32   | 0.36  | 1.81  | 2.11   | 0.2    | 1.46  |
| GAIF01033201.1 | 78.67  | 0     | 0     | 45.65  | 55.19  | 231.2 |
| GAIF01033203.1 | 0      | 0.31  | 0     | 0.33   | 0      | 0     |
| GAIF01033204.1 | 0      | 0     | 0.24  | 0.25   | 0.13   | 0.12  |
| GAIF01033205.1 | 0.41   | 0.68  | 0.82  | 0.65   | 0.49   | 0.37  |
| GAIF01033207.1 | 4.27   | 2.3   | 1.6   | 8.73   | 5.69   | 0.95  |
| GAIF01033208.1 | 0      | 0     | 0     | 0      | 0.23   | 0     |
| GAIF01033209.1 | 0.66   | 0.11  | 0.23  | 4.54   | 21.98  | 1.09  |
| GAIF01033210.1 | 0      | 0     | 0     | 0.01   | 0.05   | 0     |
| GAIF01033213.1 | 14.47  | 19.27 | 11.39 | 27.41  | 25.99  | 3.23  |
| GAIF01033214.1 | 2.62   | 1.59  | 1.57  | 0.69   | 0.53   | 0     |
| GAIF01033216.1 | 0.72   | 0.13  | 0     | 0.27   | 1.19   | 0     |
| GAIF01033218.1 | 0      | 0     | 0     | 0      | 0.05   | 0     |
| GAIF01033219.1 | 1.74   | 0     | 1.17  | 1.61   | 0.81   | 0     |
| GAIF01033220.1 | 0      | 0     | 0.19  | 0.62   | 0.11   | 0     |
| GAIF01033221.1 | 0      | 0     | 0     | 0      | 0.07   | 0     |
| GAIF01033222.1 | 0.52   | 0.28  | 0.57  | 0      | 0.31   | 1     |
| GAIF01033223.1 | 0      | 0     | 0     | 0.32   | 0.5    | 0     |
| GAIF01033224.1 | 57.94  | 40.61 | 33.75 | 162.92 | 286.12 | 96.7  |
| GAIF01033225.1 | 0.03   | 0     | 0     | 0.16   | 0.4    | 0     |
| GAIF01033226.1 | 22.25  | 14.64 | 11.74 | 35.49  | 42.17  | 24.67 |
| GAIF01033227.1 | 20.36  | 18.61 | 27.83 | 17.18  | 13.58  | 8.46  |
| GAIF01033228.1 | 100.21 | 69.67 | 56.19 | 11.83  | 6.26   | 5.76  |
| GAIF01033229.1 | 10.09  | 15.28 | 13.33 | 21.06  | 10.91  | 4.08  |
| GAIF01033230.1 | 0      | 0     | 0     | 0      | 0.61   | 0     |
| GAIF01033232.1 | 0.47   | 0.2   | 0.1   | 2.08   | 7.59   | 0     |
| GAIF01033233.1 | 0.52   | 1.18  | 1.06  | 8.04   | 13.56  | 0.24  |
| GAIF01033234.1 | 0      | 5.93  | 5.27  | 0      | 0      | 0     |
| GAIF01033235.1 | 0.08   | 0     | 0     | 0.64   | 0      | 0.17  |
| GAIF01033236.1 | 0      | 0     | 0     | 0      | 0      | 0.18  |
| GAIF01033237.1 | 0.06   | 0     | 0     | 0      | 0.15   | 0     |
| GAIF01033238.1 | 0      | 0     | 0.1   | 0      | 0.11   | 0     |
| GAIF01033239.1 | 10.06  | 6.59  | 7.71  | 4.9    | 7      | 18.96 |
| GAIF01033240.1 | 0.06   | 0     | 0.06  | 2.45   | 11.14  | 0.06  |
| GAIF01033242.1 | 0      | 0     | 0     | 0.19   | 1.07   | 0     |
| GAIF01033243.1 | 6.28   | 4.5   | 2.68  | 13.17  | 18.95  | 6.15  |
| GAIF01033245.1 | 3.91   | 10.63 | 11.8  | 30.26  | 44.9   | 7.15  |

|                |        |        |       |        |        |        |
|----------------|--------|--------|-------|--------|--------|--------|
| GAIF01033246.1 | 0      | 0      | 0     | 0      | 0.58   | 0.18   |
| GAIF01033247.1 | 171.46 | 102.25 | 68.85 | 148.38 | 101.83 | 38.35  |
| GAIF01033248.1 | 0.55   | 0.13   | 0.34  | 1.6    | 1.1    | 0.3    |
| GAIF01033249.1 | 25.8   | 30.76  | 27.68 | 50.46  | 42.25  | 17.31  |
| GAIF01033250.1 | 0      | 0      | 0     | 0      | 0.35   | 0.32   |
| GAIF01033251.1 | 27.07  | 36.79  | 5.57  | 35.34  | 54.48  | 0      |
| GAIF01033252.1 | 0      | 0      | 0     | 0      | 0.28   | 0      |
| GAIF01033253.1 | 32.68  | 8.77   | 9.4   | 30.63  | 47.51  | 26.31  |
| GAIF01033255.1 | 0      | 0      | 0     | 1.2    | 3.52   | 0      |
| GAIF01033257.1 | 60.61  | 157.74 | 87.51 | 85.62  | 113.61 | 15.01  |
| GAIF01033258.1 | 0.62   | 0.11   | 0     | 1.67   | 2.1    | 0      |
| GAIF01033259.1 | 24.59  | 2.92   | 1.87  | 80.33  | 284.65 | 634.76 |
| GAIF01033261.1 | 0      | 0      | 0.06  | 0.11   | 1.61   | 0      |
| GAIF01033262.1 | 0.11   | 0      | 0     | 0.62   | 1.47   | 0      |
| GAIF01033264.1 | 0.06   | 0.98   | 0.87  | 0      | 0      | 0.06   |
| GAIF01033265.1 | 6.07   | 5.57   | 5.51  | 20.63  | 31.07  | 1.5    |
| GAIF01033266.1 | 0.36   | 0.17   | 0     | 0.87   | 0.12   | 0.16   |
| GAIF01033269.1 | 0.28   | 0.4    | 0.41  | 0.43   | 0      | 0      |
| GAIF01033270.1 | 23.92  | 21.42  | 24.65 | 37.64  | 23.9   | 8.82   |
| GAIF01033271.1 | 5.03   | 5.58   | 5.44  | 15.79  | 24.66  | 5.28   |
| GAIF01033272.1 | 5.37   | 1.5    | 1.84  | 2.48   | 0      | 1.79   |
| GAIF01033273.1 | 0.02   | 0.04   | 0     | 0      | 0.25   | 0      |
| GAIF01033274.1 | 0      | 0      | 0     | 0      | 0.05   | 0      |
| GAIF01033275.1 | 19.9   | 22.03  | 22.24 | 36.37  | 18.84  | 12.6   |
| GAIF01033280.1 | 0.12   | 0.08   | 0.03  | 1.62   | 10.75  | 0.08   |
| GAIF01033281.1 | 0.83   | 0.31   | 0.11  | 4.14   | 13.59  | 0.26   |
| GAIF01033284.1 | 4.6    | 0      | 0     | 0      | 0      | 0      |
| GAIF01033286.1 | 0      | 0.04   | 0     | 0      | 0.05   | 0      |
| GAIF01033287.1 | 0      | 0      | 0     | 0.06   | 0.06   | 0      |
| GAIF01033288.1 | 0.23   | 0.1    | 0     | 0.47   | 5.32   | 0.35   |
| GAIF01033289.1 | 0.02   | 0.02   | 0     | 0.13   | 1.44   | 0.08   |
| GAIF01033290.1 | 0      | 0.16   | 0     | 0.86   | 1.25   | 0      |
| GAIF01033292.1 | 0.07   | 0      | 0     | 0      | 0      | 0      |
| GAIF01033293.1 | 0      | 0      | 0     | 0      | 0.74   | 0      |
| GAIF01033294.1 | 0.05   | 0      | 0     | 0      | 0      | 0      |
| GAIF01033295.1 | 0      | 0      | 0     | 0      | 0.14   | 0      |
| GAIF01033296.1 | 8.75   | 18.35  | 21.56 | 15.55  | 10.76  | 8.79   |
| GAIF01033297.1 | 52.89  | 49.39  | 14.38 | 85.06  | 80.19  | 27.84  |
| GAIF01033298.1 | 0      | 0      | 0     | 0      | 0      | 8.26   |
| GAIF01033299.1 | 0      | 0      | 0     | 0.1    | 1.92   | 0      |
| GAIF01033301.1 | 0.14   | 0.15   | 0     | 2.8    | 14.65  | 0      |
| GAIF01033303.1 | 0      | 0      | 0     | 0.08   | 0.16   | 0      |
| GAIF01033304.1 | 1.94   | 0.21   | 0.3   | 6.27   | 27.58  | 10.4   |
| GAIF01033305.1 | 27.7   | 64.58  | 51.6  | 106.71 | 75.71  | 10.41  |

|                |       |       |       |       |       |       |
|----------------|-------|-------|-------|-------|-------|-------|
| GAIF01033306.1 | 0.81  | 0     | 0     | 0.81  | 0.28  | 0.38  |
| GAIF01033307.1 | 0.98  | 0.27  | 0.27  | 2.1   | 5.46  | 0.32  |
| GAIF01033308.1 | 0     | 0     | 0     | 0     | 0.24  | 0     |
| GAIF01033310.1 | 0.04  | 0.06  | 0.09  | 0.51  | 2.72  | 0.09  |
| GAIF01033312.1 | 0.03  | 0     | 0.02  | 0.02  | 0.04  | 0     |
| GAIF01033313.1 | 0     | 0.11  | 0     | 0.12  | 1.14  | 0     |
| GAIF01033314.1 | 0     | 0     | 0     | 0     | 0.15  | 0.07  |
| GAIF01033315.1 | 21.67 | 21.68 | 31.37 | 11.35 | 3.92  | 7.82  |
| GAIF01033316.1 | 16.71 | 12.29 | 17.59 | 34.8  | 32.33 | 48.84 |
| GAIF01033317.1 | 0.78  | 0.49  | 0.09  | 8.41  | 14.53 | 0.14  |
| GAIF01033318.1 | 0     | 0     | 1.28  | 0.77  | 0.91  | 0     |
| GAIF01033319.1 | 0     | 0     | 0     | 0.01  | 0.07  | 0     |
| GAIF01033321.1 | 7.57  | 11.1  | 18.41 | 18.84 | 11.71 | 10.66 |
| GAIF01033322.1 | 0.2   | 1.02  | 0.18  | 5.09  | 2.32  | 0.15  |
| GAIF01033323.1 | 24.96 | 17.05 | 16.87 | 28.01 | 17.61 | 11.94 |
| GAIF01033324.1 | 3.08  | 2.28  | 0.38  | 4.71  | 10.52 | 3.47  |
| GAIF01033325.1 | 0.68  | 0.27  | 0.23  | 0.17  | 0.4   | 0.2   |
| GAIF01033326.1 | 0.26  | 0.67  | 0     | 0.34  | 0.41  | 0     |
| GAIF01033327.1 | 0     | 0.09  | 0     | 0     | 0.01  | 0     |
| GAIF01033329.1 | 0.22  | 0.97  | 1.22  | 0.09  | 0.18  | 0.82  |
| GAIF01033331.1 | 0.42  | 0.22  | 0.15  | 0.27  | 0     | 0     |
| GAIF01033332.1 | 45.22 | 53.84 | 28.91 | 133.2 | 92.76 | 9.46  |
| GAIF01033333.1 | 0.54  | 1.42  | 0     | 0.19  | 0.16  | 0.79  |
| GAIF01033334.1 | 3.25  | 1.12  | 0     | 3.94  | 5.45  | 0.51  |
| GAIF01033335.1 | 4.96  | 2.49  | 8.79  | 2.51  | 1.53  | 4.34  |
| GAIF01033336.1 | 3.77  | 5.53  | 5.31  | 8.63  | 6.63  | 1.8   |
| GAIF01033337.1 | 6.62  | 11.99 | 6.6   | 15.71 | 12.17 | 2.35  |
| GAIF01033338.1 | 9.57  | 11.86 | 9.55  | 25.83 | 12.65 | 3.58  |
| GAIF01033339.1 | 1.11  | 0.83  | 1.34  | 2.12  | 2.08  | 0.6   |
| GAIF01033340.1 | 0.04  | 0     | 0     | 0     | 0     | 0     |
| GAIF01033341.1 | 9.27  | 13.23 | 14.63 | 12.33 | 16.96 | 14.26 |
| GAIF01033342.1 | 23.52 | 13.32 | 16.69 | 46.08 | 52.48 | 49.66 |
| GAIF01033343.1 | 1.16  | 0.74  | 0.35  | 2.13  | 6.06  | 0.18  |
| GAIF01033345.1 | 5.22  | 6.15  | 0.72  | 0.62  | 0     | 0.92  |
| GAIF01033347.1 | 51.53 | 23.97 | 27.28 | 42.14 | 19.36 | 10.03 |
| GAIF01033349.1 | 13.71 | 18.69 | 10.09 | 14.22 | 10.46 | 1.61  |
| GAIF01033350.1 | 0.12  | 0.33  | 0.42  | 1.7   | 4.44  | 0.13  |
| GAIF01033351.1 | 1.02  | 0.51  | 0.41  | 1.78  | 1.84  | 1.17  |
| GAIF01033352.1 | 13.26 | 31.82 | 29.2  | 28.88 | 32.74 | 5.58  |
| GAIF01033353.1 | 28.51 | 18.74 | 17.03 | 30.97 | 31.24 | 25.32 |
| GAIF01033354.1 | 0.24  | 2.57  | 0.39  | 4.38  | 7.66  | 0.13  |
| GAIF01033355.1 | 0.44  | 0     | 0     | 0     | 1.58  | 0.96  |
| GAIF01033356.1 | 0.12  | 0.2   | 0     | 0.28  | 0.53  | 0     |
| GAIF01033358.1 | 0     | 0     | 0     | 0     | 0.4   | 0     |

|                |         |         |         |         |         |         |
|----------------|---------|---------|---------|---------|---------|---------|
| GAIF01033359.1 | 0.19    | 0.13    | 0       | 0       | 0       | 0       |
| GAIF01033360.1 | 0       | 0       | 0       | 0       | 0.36    | 0       |
| GAIF01033363.1 | 2.17    | 0.48    | 0.33    | 1.44    | 8.03    | 0.36    |
| GAIF01033364.1 | 39.72   | 63.08   | 25.28   | 60.09   | 64.45   | 16.28   |
| GAIF01033365.1 | 0.08    | 0       | 0.09    | 0.59    | 2.23    | 0       |
| GAIF01033366.1 | 49.67   | 98.76   | 64.66   | 133.43  | 117.89  | 15.9    |
| GAIF01033367.1 | 1.41    | 2.25    | 0.4     | 2.79    | 5.4     | 1.01    |
| GAIF01033368.1 | 14.39   | 2.07    | 8.9     | 37.27   | 36.75   | 12.94   |
| GAIF01033369.1 | 0       | 0       | 0       | 0.06    | 0       | 0       |
| GAIF01033370.1 | 16.94   | 16.35   | 12.38   | 33      | 24.77   | 5.78    |
| GAIF01033371.1 | 1.32    | 1.15    | 3.77    | 6.13    | 8.26    | 1.75    |
| GAIF01033373.1 | 409.1   | 832.56  | 909.85  | 70.16   | 50.43   | 41.05   |
| GAIF01033374.1 | 0.09    | 0.05    | 0       | 0       | 0.1     | 0       |
| GAIF01033375.1 | 0.16    | 0.43    | 0       | 0.09    | 0.95    | 0       |
| GAIF01033376.1 | 4.68    | 6.11    | 6.17    | 18.48   | 18.02   | 10.32   |
| GAIF01033377.1 | 4.96    | 7.87    | 6.91    | 11.51   | 9.51    | 0.59    |
| GAIF01033378.1 | 0       | 0       | 0.11    | 0.18    | 1.04    | 0       |
| GAIF01033379.1 | 6.95    | 9.27    | 3.42    | 11.62   | 15.66   | 0.3     |
| GAIF01033380.1 | 16.42   | 11.9    | 27.08   | 40.41   | 36.62   | 67.5    |
| GAIF01033381.1 | 17.15   | 23.34   | 29.38   | 30.47   | 15.53   | 7.93    |
| GAIF01033382.1 | 0.48    | 0.13    | 0       | 1.95    | 16.76   | 0.13    |
| GAIF01033386.1 | 9.69    | 29.53   | 44.06   | 10.29   | 11.05   | 48.61   |
| GAIF01033388.1 | 23.37   | 30.44   | 31.1    | 64.59   | 34.67   | 12.05   |
| GAIF01033390.1 | 4.49    | 7.15    | 4.37    | 12.45   | 17.07   | 2.81    |
| GAIF01033391.1 | 0       | 0       | 0       | 0.12    | 0.06    | 0       |
| GAIF01033392.1 | 0.09    | 0       | 0.15    | 1.62    | 3.35    | 0.1     |
| GAIF01033393.1 | 33.96   | 46.62   | 52.45   | 52.88   | 59.53   | 88.54   |
| GAIF01033395.1 | 5.44    | 13.78   | 4.75    | 11.21   | 18.99   | 0.69    |
| GAIF01033399.1 | 19.9    | 1.33    | 0.87    | 40.86   | 233.72  | 7.87    |
| GAIF01033401.1 | 0       | 0       | 0       | 0       | 0.05    | 0       |
| GAIF01033402.1 | 0       | 0       | 0       | 0       | 0.28    | 0       |
| GAIF01033404.1 | 36.09   | 41.28   | 11.47   | 71.93   | 70.56   | 8.28    |
| GAIF01033405.1 | 0       | 0       | 0.23    | 0.36    | 0       | 1.04    |
| GAIF01033406.1 | 3070.58 | 2183.21 | 2288.74 | 1565.85 | 1506.04 | 4965.05 |
| GAIF01033408.1 | 0       | 0       | 0       | 0.11    | 0.34    | 0       |
| GAIF01033409.1 | 0       | 0       | 0       | 0       | 0.19    | 0       |
| GAIF01033410.1 | 0.35    | 0.26    | 0       | 0       | 0.14    | 0       |
| GAIF01033411.1 | 2       | 5.22    | 3.19    | 5.92    | 7.76    | 0.88    |
| GAIF01033413.1 | 7.42    | 5.44    | 1.28    | 9.24    | 17.74   | 0.69    |
| GAIF01033414.1 | 61.3    | 22.66   | 44.03   | 93.2    | 34.29   | 91.58   |
| GAIF01033415.1 | 0.14    | 0       | 0       | 0       | 1.12    | 0.08    |
| GAIF01033416.1 | 4.93    | 1.43    | 0.6     | 34.22   | 171.74  | 0.97    |
| GAIF01033417.1 | 0.09    | 0       | 0       | 0.59    | 1.86    | 0       |
| GAIF01033419.1 | 2.78    | 1.68    | 0.76    | 0.72    | 0.65    | 0       |



|                |       |       |       |        |        |        |
|----------------|-------|-------|-------|--------|--------|--------|
| GAIF01033420.1 | 0.15  | 0     | 0     | 0      | 0      | 0      |
| GAIF01033421.1 | 0.13  | 0     | 0     | 0.3    | 0.16   | 0      |
| GAIF01033422.1 | 0.05  | 0     | 0     | 0.66   | 1.81   | 0.06   |
| GAIF01033423.1 | 0     | 0     | 0.12  | 0.04   | 0      | 0      |
| GAIF01033424.1 | 0.19  | 0.94  | 0.95  | 0.22   | 0.12   | 0      |
| GAIF01033428.1 | 0     | 0     | 0.05  | 0.12   | 0.42   | 0.22   |
| GAIF01033429.1 | 0.37  | 0.46  | 0.23  | 0.67   | 3.92   | 0      |
| GAIF01033430.1 | 36.3  | 0.36  | 0.92  | 0.78   | 0      | 0      |
| GAIF01033431.1 | 0     | 0     | 0     | 0.21   | 0.44   | 0      |
| GAIF01033433.1 | 0     | 0     | 0.21  | 0      | 1.14   | 0.42   |
| GAIF01033435.1 | 0.11  | 0     | 0.28  | 0.74   | 0.48   | 0      |
| GAIF01033436.1 | 0     | 0     | 0.13  | 0      | 0      | 0      |
| GAIF01033437.1 | 0.13  | 0     | 0     | 0      | 0      | 0.29   |
| GAIF01033438.1 | 1.23  | 0.4   | 1.42  | 0.74   | 0.36   | 1.08   |
| GAIF01033439.1 | 5.22  | 3.89  | 4.82  | 5.84   | 2.85   | 1.24   |
| GAIF01033440.1 | 1.05  | 0     | 0.19  | 1.02   | 2.18   | 3.67   |
| GAIF01033441.1 | 0.56  | 0.17  | 0.34  | 7.61   | 34.98  | 3.18   |
| GAIF01033442.1 | 3.89  | 3.32  | 6.1   | 0.78   | 0.04   | 0.3    |
| GAIF01033443.1 | 0.88  | 0.55  | 0     | 2.34   | 4.85   | 0.28   |
| GAIF01033444.1 | 1.83  | 2.38  | 2.91  | 0.42   | 0.11   | 0      |
| GAIF01033445.1 | 3.11  | 3.39  | 3.17  | 6.01   | 3      | 1.55   |
| GAIF01033446.1 | 11.72 | 8.26  | 14.36 | 142.3  | 80.24  | 106.24 |
| GAIF01033448.1 | 88.4  | 23.91 | 31.26 | 47.29  | 38.3   | 11.36  |
| GAIF01033449.1 | 0.16  | 0     | 0     | 0.25   | 0      | 0      |
| GAIF01033451.1 | 0.04  | 0     | 0     | 0.04   | 0      | 0      |
| GAIF01033452.1 | 0     | 0     | 0     | 0      | 0.14   | 0      |
| GAIF01033453.1 | 35.86 | 35.07 | 18.19 | 20.58  | 19.56  | 1.27   |
| GAIF01033454.1 | 15.82 | 17.52 | 5.54  | 37.98  | 31.86  | 2.18   |
| GAIF01033458.1 | 11.39 | 0.01  | 0.11  | 16.35  | 14.87  | 7.11   |
| GAIF01033459.1 | 64.9  | 86.6  | 40.35 | 216.64 | 106.67 | 22.65  |
| GAIF01033461.1 | 24.02 | 1.54  | 1.51  | 36.52  | 31.71  | 8.34   |
| GAIF01033462.1 | 0.5   | 0     | 0.19  | 1.47   | 7.08   | 1.33   |
| GAIF01033464.1 | 0.44  | 0.17  | 0     | 0.61   | 1.32   | 0.49   |
| GAIF01033465.1 | 0.24  | 0.18  | 0.42  | 0.85   | 0.57   | 0.73   |
| GAIF01033468.1 | 0.39  | 0     | 0     | 0.19   | 1.75   | 0      |
| GAIF01033469.1 | 0     | 0.03  | 0     | 0      | 0.03   | 0      |
| GAIF01033470.1 | 0     | 0     | 0.12  | 0      | 0.25   | 0      |
| GAIF01033471.1 | 0     | 0     | 0     | 0      | 0.28   | 0      |
| GAIF01033472.1 | 0     | 0.06  | 0     | 0.17   | 1.73   | 0      |
| GAIF01033473.1 | 10.68 | 8.81  | 5.51  | 43.28  | 69.1   | 2.89   |
| GAIF01033475.1 | 0.1   | 0     | 0     | 0      | 0      | 0      |
| GAIF01033478.1 | 0     | 0     | 0     | 0.59   | 1.52   | 0      |
| GAIF01033480.1 | 0     | 0     | 0     | 0.1    | 0      | 0      |
| GAIF01033481.1 | 0.35  | 2.35  | 4.65  | 2.52   | 2.17   | 0.87   |

|                |       |       |        |        |        |       |
|----------------|-------|-------|--------|--------|--------|-------|
| GAIF01033482.1 | 33.33 | 52.87 | 6.89   | 0.58   | 0.66   | 0.42  |
| GAIF01033483.1 | 0     | 0.34  | 0.51   | 0.91   | 0.19   | 0.52  |
| GAIF01033484.1 | 20.5  | 20.14 | 10.17  | 16.45  | 20.37  | 3.32  |
| GAIF01033485.1 | 49.34 | 67.28 | 136.85 | 123.31 | 53.5   | 82.25 |
| GAIF01033487.1 | 0     | 0     | 0.07   | 0.14   | 0      | 0.14  |
| GAIF01033488.1 | 0.73  | 0.2   | 0.13   | 5.25   | 17.51  | 1.55  |
| GAIF01033490.1 | 0     | 0     | 0.06   | 0      | 0.38   | 0     |
| GAIF01033491.1 | 0     | 0     | 0      | 0.11   | 0.42   | 0     |
| GAIF01033492.1 | 28.91 | 12.11 | 48.83  | 55.43  | 64.67  | 31    |
| GAIF01033493.1 | 0     | 0     | 0.08   | 0      | 0      | 0     |
| GAIF01033494.1 | 2.93  | 5.56  | 6.81   | 5.56   | 4.42   | 8.86  |
| GAIF01033495.1 | 22.88 | 7.78  | 3.45   | 34.84  | 26.96  | 52.36 |
| GAIF01033496.1 | 2.58  | 1.93  | 1.25   | 9.36   | 10.14  | 36.9  |
| GAIF01033497.1 | 48.61 | 63.71 | 51.17  | 123.8  | 149.31 | 33.61 |
| GAIF01033499.1 | 6.29  | 8.14  | 3.94   | 31.42  | 25.45  | 2.68  |
| GAIF01033500.1 | 17.42 | 14.79 | 21.23  | 5.75   | 3.07   | 6.17  |
| GAIF01033501.1 | 0.05  | 0.1   | 0.05   | 0.16   | 1.33   | 0     |
| GAIF01033503.1 | 0     | 0.44  | 0.06   | 0.51   | 1.15   | 0.09  |
| GAIF01033504.1 | 14.2  | 19.42 | 21.32  | 19.15  | 14.88  | 7.31  |
| GAIF01033507.1 | 0     | 0     | 0      | 0      | 0      | 0.1   |
| GAIF01033508.1 | 0.08  | 0.03  | 0.03   | 0      | 0      | 0     |
| GAIF01033511.1 | 73.24 | 54.76 | 91.15  | 69.64  | 47.41  | 42.02 |
| GAIF01033512.1 | 1.18  | 0.77  | 0.39   | 1.51   | 0.28   | 0.26  |
| GAIF01033513.1 | 0     | 0.04  | 0      | 0      | 0      | 0     |
| GAIF01033514.1 | 0.03  | 0     | 0.07   | 0      | 0.23   | 0     |
| GAIF01033515.1 | 6.53  | 4.03  | 1.31   | 11.79  | 17.62  | 1.91  |
| GAIF01033516.1 | 17.77 | 5.73  | 0      | 7.08   | 6.67   | 1.88  |
| GAIF01033518.1 | 0.45  | 0     | 0      | 0      | 0.44   | 0     |
| GAIF01033519.1 | 8.24  | 3.09  | 5.6    | 18.34  | 31.15  | 31.14 |
| GAIF01033520.1 | 1.73  | 2.82  | 0      | 0      | 1.73   | 0     |
| GAIF01033523.1 | 23.54 | 25.54 | 22     | 3.06   | 1.98   | 2.54  |
| GAIF01033524.1 | 14.1  | 24.74 | 15.88  | 22.09  | 11.83  | 2.7   |
| GAIF01033525.1 | 11.55 | 18.55 | 6.21   | 48.14  | 67.04  | 1.37  |
| GAIF01033526.1 | 2.22  | 0     | 0.26   | 53.17  | 111.13 | 42.61 |
| GAIF01033527.1 | 0.07  | 0     | 0      | 0      | 0.46   | 0     |
| GAIF01033528.1 | 0.09  | 0     | 0      | 0      | 0.11   | 0     |
| GAIF01033529.1 | 0     | 0.26  | 0      | 0      | 0      | 0     |
| GAIF01033532.1 | 0.28  | 0     | 0.05   | 0.71   | 3.12   | 0     |
| GAIF01033533.1 | 7.71  | 6.73  | 5.06   | 21.28  | 43.12  | 3.4   |
| GAIF01033534.1 | 0     | 0     | 0      | 0.3    | 0      | 0     |
| GAIF01033535.1 | 62.85 | 23.68 | 11.11  | 90.65  | 76.19  | 14.43 |
| GAIF01033537.1 | 0     | 0     | 0      | 0.05   | 0      | 0     |
| GAIF01033538.1 | 0     | 0     | 0      | 0.02   | 0      | 0     |
| GAIF01033540.1 | 0     | 0.04  | 0      | 0      | 0.01   | 0     |

|                |        |        |        |        |         |        |
|----------------|--------|--------|--------|--------|---------|--------|
| GAIF01033541.1 | 0.15   | 0      | 0.08   | 2.69   | 3.99    | 0.34   |
| GAIF01033543.1 | 3.07   | 0.17   | 0.34   | 0.54   | 0.75    | 1.38   |
| GAIF01033544.1 | 158.08 | 38.19  | 34.75  | 1.94   | 1.02    | 0.64   |
| GAIF01033547.1 | 0      | 0      | 0.12   | 2.63   | 11.67   | 0.12   |
| GAIF01033549.1 | 19.72  | 20.5   | 21.86  | 27.27  | 15.11   | 11.08  |
| GAIF01033550.1 | 0.27   | 0.07   | 0.03   | 0.75   | 3.65    | 0      |
| GAIF01033551.1 | 0      | 0.05   | 0      | 0.15   | 0       | 0      |
| GAIF01033552.1 | 11.15  | 3.73   | 13.51  | 4.18   | 4.84    | 7.78   |
| GAIF01033553.1 | 0.46   | 0      | 0      | 0.09   | 0.09    | 0      |
| GAIF01033554.1 | 2.25   | 0.46   | 0      | 1.1    | 2.99    | 0.33   |
| GAIF01033555.1 | 0      | 0.27   | 0.14   | 0      | 0       | 0      |
| GAIF01033556.1 | 0      | 0      | 0      | 0.04   | 0       | 0      |
| GAIF01033557.1 | 65.89  | 68.59  | 0.65   | 122.57 | 193.91  | 12.45  |
| GAIF01033558.1 | 0      | 0      | 0      | 0      | 0.09    | 0      |
| GAIF01033559.1 | 311.83 | 227.66 | 85.91  | 668.13 | 1080.98 | 59.53  |
| GAIF01033561.1 | 0      | 0      | 0      | 0      | 0       | 0.05   |
| GAIF01033562.1 | 0      | 0.07   | 0      | 0      | 0       | 0.07   |
| GAIF01033563.1 | 0      | 0      | 0.2    | 0      | 0       | 0      |
| GAIF01033564.1 | 0.26   | 1.43   | 0      | 1.83   | 1.54    | 0.11   |
| GAIF01033565.1 | 63.34  | 22.39  | 16.23  | 111.57 | 126.07  | 54.49  |
| GAIF01033566.1 | 0      | 0      | 0      | 0      | 0.9     | 0.25   |
| GAIF01033567.1 | 12.02  | 12.52  | 20.46  | 27.67  | 35.22   | 17.22  |
| GAIF01033568.1 | 0      | 0      | 0      | 1      | 0.74    | 0      |
| GAIF01033569.1 | 0      | 0      | 0      | 0      | 0.3     | 0      |
| GAIF01033570.1 | 0.34   | 0      | 0      | 0.1    | 0.17    | 0.06   |
| GAIF01033571.1 | 0      | 0      | 0.01   | 0.14   | 0.27    | 0      |
| GAIF01033572.1 | 0.96   | 0      | 2.07   | 0.63   | 0       | 0.73   |
| GAIF01033573.1 | 178.5  | 225.13 | 348.82 | 139.83 | 128.49  | 408.67 |
| GAIF01033574.1 | 36.16  | 37.64  | 34.84  | 64.96  | 42.62   | 12.57  |
| GAIF01033575.1 | 2.87   | 0.68   | 0.14   | 10.42  | 21.3    | 0.55   |
| GAIF01033576.1 | 0.13   | 0.52   | 0.72   | 0      | 0.15    | 0.25   |
| GAIF01033577.1 | 0      | 0      | 0      | 0      | 2.95    | 0      |
| GAIF01033578.1 | 6.79   | 4.8    | 2.63   | 19.4   | 27.66   | 2.45   |
| GAIF01033579.1 | 0.07   | 0      | 0      | 0.08   | 1.08    | 0.08   |
| GAIF01033580.1 | 0      | 0      | 0      | 0      | 0.18    | 0      |
| GAIF01033581.1 | 5.41   | 1.38   | 0.06   | 3.28   | 7.2     | 1.78   |
| GAIF01033583.1 | 15.31  | 0      | 7.48   | 11.25  | 20.18   | 21.48  |
| GAIF01033584.1 | 1.11   | 1.34   | 0.81   | 5.16   | 9.21    | 1.77   |
| GAIF01033585.1 | 0.1    | 0.05   | 0.05   | 0.73   | 2.46    | 0.27   |
| GAIF01033586.1 | 0      | 0      | 0      | 0      | 0.1     | 0      |
| GAIF01033587.1 | 0.4    | 0.1    | 0.03   | 0.09   | 0       | 0.06   |
| GAIF01033588.1 | 30.4   | 9.97   | 4.74   | 19.46  | 66.88   | 18     |
| GAIF01033590.1 | 0      | 0      | 0.16   | 0      | 0.51    | 0      |
| GAIF01033591.1 | 0      | 0      | 0      | 0.52   | 1.88    | 0.12   |

|                |         |         |        |        |         |        |
|----------------|---------|---------|--------|--------|---------|--------|
| GAIF01033592.1 | 0       | 0.04    | 0      | 0      | 0       | 0      |
| GAIF01033594.1 | 0       | 0       | 0      | 0.51   | 0.88    | 0      |
| GAIF01033595.1 | 0       | 0       | 0.1    | 0      | 0       | 0      |
| GAIF01033596.1 | 0.18    | 0.09    | 0.05   | 1.13   | 5.17    | 0.41   |
| GAIF01033597.1 | 0       | 0       | 0.53   | 0.28   | 0       | 0.63   |
| GAIF01033598.1 | 724.29  | 1592.93 | 376.09 | 724.36 | 1331.04 | 620.21 |
| GAIF01033599.1 | 0.79    | 0.17    | 0.17   | 3.29   | 8.56    | 6.79   |
| GAIF01033601.1 | 3.75    | 7.93    | 6.25   | 19.19  | 11.35   | 1.33   |
| GAIF01033602.1 | 122.92  | 63.84   | 40.94  | 26.33  | 26.13   | 13.17  |
| GAIF01033606.1 | 11.9    | 18.26   | 14.55  | 17.57  | 30.79   | 6.81   |
| GAIF01033608.1 | 0.07    | 0.33    | 0.41   | 0.43   | 0.57    | 0      |
| GAIF01033609.1 | 0       | 0       | 0      | 0.17   | 0       | 0      |
| GAIF01033610.1 | 57.15   | 35.82   | 23.41  | 73.57  | 86.64   | 88.82  |
| GAIF01033612.1 | 17.17   | 9.99    | 1.28   | 60.49  | 59.09   | 0      |
| GAIF01033613.1 | 4.73    | 4.02    | 2.64   | 13.36  | 2.07    | 0.95   |
| GAIF01033616.1 | 0       | 0       | 0      | 0.52   | 0.44    | 0.51   |
| GAIF01033618.1 | 0.23    | 0       | 0      | 0      | 0       | 0      |
| GAIF01033619.1 | 4.01    | 0       | 0      | 22.32  | 54.85   | 26.07  |
| GAIF01033620.1 | 0       | 0       | 0      | 0      | 0.08    | 0      |
| GAIF01033621.1 | 18.49   | 8.44    | 12.4   | 55.71  | 121.56  | 173.17 |
| GAIF01033623.1 | 9.38    | 3.87    | 1.78   | 0      | 0       | 0      |
| GAIF01033625.1 | 0       | 0.21    | 0      | 0      | 0       | 0.11   |
| GAIF01033626.1 | 0       | 0       | 0      | 0      | 0.13    | 0      |
| GAIF01033629.1 | 0       | 0.91    | 0.28   | 0      | 0.16    | 0      |
| GAIF01033630.1 | 47.38   | 39.04   | 7.77   | 54.04  | 76.73   | 40.45  |
| GAIF01033631.1 | 0.36    | 0       | 0      | 0      | 0       | 0      |
| GAIF01033632.1 | 15.48   | 23.9    | 52.19  | 23.72  | 25.51   | 19.03  |
| GAIF01033633.1 | 0       | 0       | 0      | 0.33   | 0       | 0      |
| GAIF01033635.1 | 0.04    | 0       | 0      | 0.04   | 0.44    | 0.04   |
| GAIF01033636.1 | 10.54   | 13.24   | 15.68  | 22.4   | 21.03   | 8.73   |
| GAIF01033637.1 | 0       | 0       | 0      | 0.64   | 1       | 0      |
| GAIF01033638.1 | 0.12    | 0       | 0      | 0.14   | 0.3     | 0      |
| GAIF01033639.1 | 0.53    | 1.29    | 0.8    | 1.77   | 1.88    | 0.25   |
| GAIF01033641.1 | 0.63    | 0       | 0      | 0      | 0       | 0      |
| GAIF01033642.1 | 2.28    | 0.53    | 0.36   | 7      | 27.44   | 13.29  |
| GAIF01033643.1 | 14.77   | 18.08   | 18.5   | 27.24  | 15.14   | 5.02   |
| GAIF01033644.1 | 0       | 0.18    | 0.43   | 0      | 0       | 0.68   |
| GAIF01033646.1 | 1973.88 | 1962.99 | 376.79 | 134.12 | 232.41  | 115.95 |
| GAIF01033647.1 | 0.01    | 0       | 0      | 0      | 0       | 0      |
| GAIF01033648.1 | 7.26    | 2.62    | 1.54   | 35.97  | 72.34   | 2.21   |
| GAIF01033649.1 | 0.07    | 0       | 0      | 0      | 0       | 0      |
| GAIF01033650.1 | 0.34    | 0       | 0.26   | 2.12   | 4.73    | 0.61   |
| GAIF01033651.1 | 0       | 0       | 0      | 0      | 2.38    | 0      |
| GAIF01033652.1 | 0.04    | 0       | 0      | 0.05   | 0.31    | 0.1    |

|                |        |        |        |        |       |        |
|----------------|--------|--------|--------|--------|-------|--------|
| GAIF01033653.1 | 0      | 0      | 0      | 0.11   | 0.11  | 0      |
| GAIF01033654.1 | 0      | 0      | 0.12   | 0      | 0     | 0      |
| GAIF01033657.1 | 159.43 | 117.48 | 135.78 | 57.59  | 70.81 | 263.59 |
| GAIF01033658.1 | 0      | 0.01   | 0.01   | 0.45   | 2.06  | 0.01   |
| GAIF01033659.1 | 0      | 0      | 0      | 6.07   | 20.63 | 0      |
| GAIF01033660.1 | 30.69  | 29.84  | 17.23  | 61.69  | 70.31 | 5.24   |
| GAIF01033661.1 | 1      | 0.07   | 0.24   | 5.76   | 41.05 | 1.63   |
| GAIF01033662.1 | 0      | 0      | 0.11   | 0      | 0.12  | 0      |
| GAIF01033663.1 | 0.26   | 0.22   | 0      | 5.17   | 16.01 | 0.06   |
| GAIF01033664.1 | 107.65 | 118.82 | 102.64 | 92.36  | 43.71 | 20.72  |
| GAIF01033665.1 | 0.32   | 0.52   | 0.53   | 0.93   | 4.8   | 0.53   |
| GAIF01033666.1 | 0      | 0      | 0      | 0.11   | 0     | 0      |
| GAIF01033667.1 | 0      | 0.11   | 0      | 0      | 0.12  | 0      |
| GAIF01033668.1 | 0      | 0      | 0      | 0      | 0.35  | 0      |
| GAIF01033669.1 | 0.97   | 1.38   | 0.93   | 8.29   | 8.23  | 0.22   |
| GAIF01033670.1 | 0.29   | 0.04   | 0      | 1.37   | 7.84  | 0.36   |
| GAIF01033671.1 | 1      | 0.72   | 1.1    | 3.09   | 1.8   | 1.47   |
| GAIF01033672.1 | 40.62  | 34.26  | 15.9   | 31.43  | 42.69 | 14.06  |
| GAIF01033673.1 | 0.93   | 0.11   | 0.06   | 4.2    | 14.32 | 2.97   |
| GAIF01033674.1 | 0.5    | 0.18   | 0      | 2.53   | 9.69  | 0.37   |
| GAIF01033675.1 | 0.05   | 0      | 0      | 0      | 0.22  | 0      |
| GAIF01033678.1 | 0.44   | 0.12   | 0      | 1.03   | 5.45  | 0.12   |
| GAIF01033679.1 | 0.04   | 0.02   | 0      | 0.15   | 0.51  | 0.04   |
| GAIF01033680.1 | 0.24   | 0.04   | 0.11   | 0.32   | 0.7   | 0.11   |
| GAIF01033681.1 | 34.41  | 45.02  | 29.21  | 71.52  | 52.77 | 12.66  |
| GAIF01033682.1 | 3.28   | 0.76   | 0.54   | 1.29   | 0     | 0      |
| GAIF01033683.1 | 0      | 0      | 0      | 0      | 1.61  | 0      |
| GAIF01033684.1 | 0      | 0      | 0      | 0.06   | 0     | 0      |
| GAIF01033687.1 | 2.23   | 1.91   | 1.16   | 13.65  | 23.39 | 0.85   |
| GAIF01033688.1 | 0.33   | 0.55   | 0.21   | 0.84   | 0.53  | 0.1    |
| GAIF01033690.1 | 10.3   | 11.25  | 11.02  | 7.4    | 1.91  | 2.49   |
| GAIF01033691.1 | 44.16  | 53.83  | 51.53  | 154.15 | 86.85 | 29.03  |
| GAIF01033692.1 | 15.08  | 6.43   | 5.24   | 18.83  | 24.37 | 32.39  |
| GAIF01033693.1 | 50.29  | 77.82  | 71.89  | 91.88  | 46.97 | 15.72  |
| GAIF01033695.1 | 6.32   | 5.07   | 4.7    | 10.49  | 17.62 | 19.17  |
| GAIF01033696.1 | 44.1   | 36.48  | 19.56  | 40.06  | 59.99 | 18.41  |
| GAIF01033697.1 | 55.52  | 14.28  | 18.63  | 14.92  | 16.28 | 86.27  |
| GAIF01033698.1 | 2.58   | 0.16   | 0.25   | 2.11   | 7.3   | 7.77   |
| GAIF01033699.1 | 0      | 0      | 0.05   | 0      | 0     | 0      |
| GAIF01033700.1 | 0      | 0      | 0      | 0      | 0.29  | 0      |
| GAIF01033701.1 | 0      | 0      | 0      | 0      | 0.04  | 0      |
| GAIF01033704.1 | 0      | 15.29  | 0      | 21.97  | 19.95 | 5.49   |
| GAIF01033706.1 | 1.85   | 2.85   | 1.77   | 2.32   | 1.11  | 0.34   |
| GAIF01033707.1 | 15.24  | 20.45  | 16.83  | 34.13  | 30.22 | 6.58   |

|                |        |         |         |        |        |        |
|----------------|--------|---------|---------|--------|--------|--------|
| GAIF01033708.1 | 28.86  | 12.92   | 9.58    | 0      | 14.68  | 64.47  |
| GAIF01033709.1 | 0.57   | 2.65    | 3.58    | 3.65   | 0.64   | 0      |
| GAIF01033711.1 | 0.67   | 0.05    | 0.05    | 1.55   | 11.67  | 1.26   |
| GAIF01033714.1 | 2.84   | 1.12    | 2.24    | 3.76   | 6.07   | 4.9    |
| GAIF01033716.1 | 92.88  | 48.92   | 78.23   | 81.77  | 79.54  | 70.41  |
| GAIF01033717.1 | 2      | 1.1     | 0.77    | 3.71   | 9.2    | 0.81   |
| GAIF01033718.1 | 0      | 0       | 0       | 0      | 0.4    | 0      |
| GAIF01033719.1 | 0      | 0.06    | 0.11    | 0      | 0      | 0      |
| GAIF01033720.1 | 5.59   | 10.63   | 9.85    | 27.3   | 15.82  | 3.73   |
| GAIF01033721.1 | 0.92   | 1.3     | 4.34    | 3.44   | 2.8    | 17.49  |
| GAIF01033722.1 | 0.07   | 0       | 0       | 0      | 0      | 0      |
| GAIF01033723.1 | 0.3    | 0       | 0       | 0.35   | 1.33   | 0      |
| GAIF01033724.1 | 6.22   | 2.98    | 0.93    | 13.98  | 25.61  | 2.26   |
| GAIF01033727.1 | 793    | 1773.63 | 2224.44 | 343.1  | 720.9  | 723.85 |
| GAIF01033728.1 | 0.53   | 0.11    | 0.05    | 0.24   | 0.1    | 0.02   |
| GAIF01033729.1 | 0.21   | 0       | 0       | 1.64   | 7.34   | 0.06   |
| GAIF01033730.1 | 11.35  | 18.34   | 5.33    | 48.37  | 34.72  | 6.07   |
| GAIF01033731.1 | 4.37   | 2.14    | 1.18    | 7.78   | 7.79   | 1.49   |
| GAIF01033732.1 | 0      | 0       | 0       | 0      | 75.83  | 0      |
| GAIF01033733.1 | 24.67  | 22.39   | 17.9    | 56.51  | 22.7   | 10.4   |
| GAIF01033734.1 | 0.1    | 0.63    | 0.46    | 1.28   | 8.04   | 0.69   |
| GAIF01033735.1 | 0.08   | 0       | 0       | 0      | 0.27   | 0      |
| GAIF01033736.1 | 0      | 0       | 0       | 0      | 0.33   | 0      |
| GAIF01033737.1 | 0      | 0.06    | 0       | 0      | 0      | 0      |
| GAIF01033738.1 | 0      | 0       | 0       | 1.64   | 11.29  | 0      |
| GAIF01033740.1 | 0.71   | 0.77    | 0       | 4.92   | 2.55   | 0      |
| GAIF01033741.1 | 1.21   | 0.12    | 0       | 3.7    | 9.91   | 0      |
| GAIF01033742.1 | 62.09  | 60.6    | 32.8    | 19.92  | 17.29  | 6.02   |
| GAIF01033743.1 | 0      | 0       | 0       | 0.01   | 0      | 0.03   |
| GAIF01033744.1 | 14.28  | 20.89   | 18      | 32.65  | 0      | 8.27   |
| GAIF01033745.1 | 58.74  | 108.27  | 132.67  | 131.73 | 136.43 | 59.01  |
| GAIF01033747.1 | 0      | 0       | 0       | 6.89   | 0      | 0.35   |
| GAIF01033748.1 | 1.14   | 0.38    | 0       | 3.68   | 14.72  | 2.62   |
| GAIF01033750.1 | 0.18   | 0       | 0       | 0      | 0      | 0      |
| GAIF01033751.1 | 0      | 0       | 0       | 0.35   | 0.18   | 0      |
| GAIF01033753.1 | 0      | 0       | 0       | 0      | 0.06   | 0      |
| GAIF01033754.1 | 0      | 0       | 0       | 0.06   | 0.12   | 0      |
| GAIF01033755.1 | 162.55 | 181.35  | 177.49  | 8.99   | 11.6   | 29.51  |
| GAIF01033756.1 | 0.27   | 0       | 0       | 1.42   | 7.06   | 0      |
| GAIF01033759.1 | 2.46   | 2.03    | 1       | 0      | 0.27   | 0      |
| GAIF01033760.1 | 21.38  | 8.37    | 15.02   | 10.24  | 6.65   | 6.67   |
| GAIF01033761.1 | 0.17   | 0       | 0       | 0      | 0.07   | 0      |
| GAIF01033765.1 | 0      | 0       | 0       | 0.04   | 0.31   | 0      |
| GAIF01033766.1 | 18.35  | 10.85   | 17.79   | 7.87   | 5.05   | 7.85   |

|                |         |         |         |        |        |        |
|----------------|---------|---------|---------|--------|--------|--------|
| GAIF01033767.1 | 0.14    | 0       | 0       | 0.09   | 0.76   | 0      |
| GAIF01033769.1 | 0       | 0       | 0       | 0      | 1.59   | 0.15   |
| GAIF01033770.1 | 0       | 0.1     | 0       | 0.86   | 0.34   | 0.21   |
| GAIF01033771.1 | 0.07    | 0       | 0       | 0.12   | 0.86   | 0      |
| GAIF01033772.1 | 0.14    | 0.08    | 0       | 0      | 0.08   | 0      |
| GAIF01033774.1 | 10.95   | 12.8    | 6.31    | 27.17  | 34.34  | 2.34   |
| GAIF01033775.1 | 0       | 2.24    | 0       | 1.5    | 0      | 0      |
| GAIF01033776.1 | 0       | 0       | 0       | 0.07   | 0      | 0      |
| GAIF01033777.1 | 0       | 0       | 0       | 0.48   | 1.88   | 0      |
| GAIF01033778.1 | 6.05    | 5.71    | 0.26    | 56.96  | 8.33   | 0      |
| GAIF01033779.1 | 0       | 0       | 0.14    | 0      | 0      | 0      |
| GAIF01033780.1 | 0.14    | 0.2     | 0       | 0.01   | 0      | 0.03   |
| GAIF01033782.1 | 16.62   | 19.32   | 13.53   | 29.27  | 18.61  | 3.47   |
| GAIF01033784.1 | 0.49    | 0.04    | 0.01    | 0.28   | 1.59   | 0.36   |
| GAIF01033785.1 | 0       | 0.15    | 0.15    | 0      | 0      | 0      |
| GAIF01033786.1 | 16.18   | 10.76   | 19.81   | 28.24  | 14.14  | 45.42  |
| GAIF01033787.1 | 7.97    | 3       | 6.87    | 11.95  | 12.16  | 14.86  |
| GAIF01033788.1 | 30.9    | 16.12   | 29.71   | 21.31  | 14.7   | 37.9   |
| GAIF01033789.1 | 0       | 0       | 0       | 0.69   | 0.31   | 0.56   |
| GAIF01033790.1 | 42.11   | 16.86   | 13.85   | 47.61  | 46.65  | 16.31  |
| GAIF01033791.1 | 0       | 0       | 0.08    | 2.21   | 5.06   | 0      |
| GAIF01033792.1 | 24.91   | 59      | 54.43   | 14.39  | 24.61  | 13.02  |
| GAIF01033793.1 | 0       | 0       | 0.07    | 0.07   | 0      | 0      |
| GAIF01033794.1 | 0.19    | 0       | 0       | 0      | 0.11   | 0      |
| GAIF01033795.1 | 0.09    | 0.19    | 0       | 0.21   | 0.43   | 0      |
| GAIF01033796.1 | 0       | 0       | 0       | 0      | 0      | 0.09   |
| GAIF01033797.1 | 0       | 0.09    | 0       | 0      | 0      | 0      |
| GAIF01033798.1 | 2135.33 | 1044.77 | 2153.22 | 594.28 | 98.83  | 220.81 |
| GAIF01033799.1 | 0       | 0       | 0       | 0      | 4.06   | 0.03   |
| GAIF01033800.1 | 7.53    | 6.62    | 2.29    | 10.04  | 17.53  | 1.94   |
| GAIF01033801.1 | 0.6     | 0.39    | 1.08    | 1.16   | 0.8    | 1.01   |
| GAIF01033802.1 | 0       | 0       | 0       | 0.3    | 1.78   | 0      |
| GAIF01033804.1 | 0.15    | 0.28    | 0.05    | 0.21   | 0.21   | 0      |
| GAIF01033805.1 | 0       | 0       | 0       | 0      | 0.18   | 0      |
| GAIF01033807.1 | 2.28    | 519.04  | 1123.64 | 12.9   | 86.88  | 88.55  |
| GAIF01033811.1 | 0.88    | 0.38    | 0.1     | 0.97   | 3.84   | 0.34   |
| GAIF01033812.1 | 105.97  | 137.1   | 85.99   | 261.19 | 207.29 | 23.53  |
| GAIF01033814.1 | 0.09    | 0.11    | 0.02    | 0.51   | 5.63   | 0.23   |
| GAIF01033815.1 | 2.17    | 0.99    | 0       | 1.04   | 5.22   | 1.59   |
| GAIF01033816.1 | 0.07    | 0.28    | 0.05    | 0.66   | 5.47   | 0.82   |
| GAIF01033817.1 | 1.38    | 0.75    | 0.51    | 6.95   | 12.66  | 0.12   |
| GAIF01033819.1 | 0       | 0       | 0       | 0      | 0.17   | 0      |
| GAIF01033820.1 | 3.03    | 0       | 0.42    | 0      | 0      | 0      |
| GAIF01033821.1 | 0       | 0.07    | 0       | 0.98   | 1.26   | 0      |

|                |        |        |        |         |         |         |
|----------------|--------|--------|--------|---------|---------|---------|
| GAIF01033823.1 | 0.06   | 0      | 0      | 0.13    | 0.11    | 0.06    |
| GAIF01033825.1 | 12.06  | 3.18   | 3.15   | 16.77   | 27.07   | 17.17   |
| GAIF01033826.1 | 13.12  | 13.13  | 13.16  | 13.08   | 5.21    | 3.51    |
| GAIF01033829.1 | 0.22   | 0.23   | 0.12   | 0       | 0       | 0       |
| GAIF01033830.1 | 2.59   | 0.52   | 0.31   | 4.93    | 12.12   | 0.69    |
| GAIF01033832.1 | 30.67  | 48.69  | 28.69  | 7.12    | 2.8     | 0.14    |
| GAIF01033833.1 | 8.25   | 11.1   | 11.73  | 25.35   | 10.21   | 3.99    |
| GAIF01033834.1 | 0.09   | 0.13   | 0      | 0.07    | 0.11    | 0.1     |
| GAIF01033835.1 | 0.25   | 0.14   | 0      | 0.87    | 6.03    | 0       |
| GAIF01033836.1 | 0      | 0      | 0.06   | 0       | 0       | 0       |
| GAIF01033838.1 | 0.47   | 0      | 0.35   | 0.55    | 3.22    | 0.52    |
| GAIF01033840.1 | 0      | 0      | 0      | 0       | 0.96    | 0       |
| GAIF01033841.1 | 1.5    | 0      | 0.88   | 1.54    | 2.14    | 2.2     |
| GAIF01033842.1 | 0.23   | 0.09   | 0      | 0       | 0       | 0       |
| GAIF01033843.1 | 1.56   | 0.66   | 1.71   | 0.39    | 0.73    | 0       |
| GAIF01033844.1 | 5.1    | 6.87   | 4.49   | 5.17    | 3.03    | 4.38    |
| GAIF01033847.1 | 35.25  | 28.91  | 36.04  | 95.9    | 60.63   | 66.54   |
| GAIF01033848.1 | 0.29   | 0.56   | 0.48   | 0.51    | 0.8     | 0       |
| GAIF01033851.1 | 0      | 0.07   | 0      | 0.08    | 0       | 0       |
| GAIF01033852.1 | 614.29 | 239.84 | 289.66 | 1167.43 | 1547.67 | 8387.38 |
| GAIF01033853.1 | 0.1    | 0      | 0.23   | 0.48    | 1.37    | 0       |
| GAIF01033854.1 | 0.16   | 0      | 0      | 0.07    | 0       | 0       |
| GAIF01033855.1 | 0      | 0      | 0.05   | 0.05    | 0       | 0       |
| GAIF01033856.1 | 21.17  | 31.18  | 45.75  | 11.09   | 13      | 8.54    |
| GAIF01033857.1 | 12.68  | 25.46  | 25.33  | 36.95   | 28.43   | 6.93    |
| GAIF01033858.1 | 0      | 0      | 0      | 0       | 0.03    | 0       |
| GAIF01033859.1 | 0      | 0      | 0      | 0.03    | 0.4     | 0       |
| GAIF01033860.1 | 3.2    | 1.27   | 0.16   | 7.94    | 6.47    | 1.92    |
| GAIF01033861.1 | 2.28   | 0.88   | 2.36   | 11.69   | 6.14    | 14.8    |
| GAIF01033862.1 | 2.6    | 2.21   | 2.6    | 3.67    | 0       | 0       |
| GAIF01033864.1 | 20.28  | 36.89  | 23.89  | 23.48   | 18.69   | 4.24    |
| GAIF01033865.1 | 0.22   | 0.09   | 0.09   | 0.47    | 1.88    | 0.09    |
| GAIF01033866.1 | 12.98  | 5.12   | 3.92   | 2.64    | 2.44    | 2.15    |
| GAIF01033867.1 | 18.41  | 24.19  | 12.11  | 100.32  | 84.92   | 6.33    |
| GAIF01033868.1 | 0.04   | 0.04   | 0      | 0.23    | 1.74    | 0.08    |
| GAIF01033869.1 | 0.06   | 0.07   | 0      | 0.07    | 0       | 0       |
| GAIF01033871.1 | 0.13   | 0.04   | 0      | 0.38    | 1.08    | 0       |
| GAIF01033872.1 | 5.43   | 1.81   | 0      | 5.88    | 5.78    | 1.22    |
| GAIF01033873.1 | 0.05   | 0.1    | 0.27   | 0.35    | 0.37    | 0       |
| GAIF01033874.1 | 0.03   | 0      | 0      | 0       | 0.04    | 0       |
| GAIF01033875.1 | 0.77   | 0.95   | 1.24   | 3       | 4.14    | 1.42    |
| GAIF01033878.1 | 1.15   | 0.29   | 0.2    | 3.5     | 12.71   | 0.29    |
| GAIF01033879.1 | 0      | 0      | 0      | 0.05    | 0.11    | 0       |
| GAIF01033880.1 | 35.84  | 21.19  | 11.19  | 41.49   | 30.14   | 10.28   |



|                |        |        |        |        |       |       |
|----------------|--------|--------|--------|--------|-------|-------|
| GAIF01033881.1 | 0      | 0      | 0      | 0      | 0.35  | 0     |
| GAIF01033882.1 | 0      | 0      | 0      | 0.12   | 1.03  | 0     |
| GAIF01033884.1 | 0.08   | 0.17   | 0      | 0      | 0.09  | 0     |
| GAIF01033885.1 | 0.21   | 1.14   | 0.12   | 2.79   | 4.96  | 0.12  |
| GAIF01033886.1 | 0      | 0.04   | 0      | 0.1    | 0.35  | 0     |
| GAIF01033887.1 | 2.54   | 0.12   | 0.06   | 8.08   | 40.66 | 4.24  |
| GAIF01033888.1 | 0.09   | 0      | 0      | 0.45   | 1.86  | 0     |
| GAIF01033889.1 | 0      | 1.06   | 0      | 0      | 1.13  | 5.3   |
| GAIF01033891.1 | 0      | 0      | 0.23   | 0      | 0.11  | 0     |
| GAIF01033892.1 | 0.37   | 0.2    | 0      | 0      | 0     | 0     |
| GAIF01033893.1 | 9.56   | 3.68   | 3.07   | 1.37   | 2.3   | 1.3   |
| GAIF01033895.1 | 190.58 | 43.55  | 75.3   | 160.01 | 36.95 | 45.67 |
| GAIF01033901.1 | 8.05   | 19.59  | 1.12   | 3.52   | 4.42  | 0     |
| GAIF01033902.1 | 18.48  | 15.91  | 15.44  | 26.32  | 21.55 | 7.12  |
| GAIF01033903.1 | 0      | 1.59   | 1.6    | 0.09   | 0.1   | 0     |
| GAIF01033904.1 | 17.24  | 19.09  | 14.75  | 38.22  | 34.31 | 8.43  |
| GAIF01033905.1 | 3.51   | 2.92   | 2.87   | 9.01   | 8.08  | 6.58  |
| GAIF01033906.1 | 0      | 0.23   | 0.19   | 0      | 0     | 0     |
| GAIF01033907.1 | 0      | 0.21   | 0      | 0.51   | 1.35  | 0     |
| GAIF01033911.1 | 0      | 0      | 0.63   | 0      | 0     | 0.63  |
| GAIF01033912.1 | 4.04   | 13.17  | 4.43   | 14.02  | 9.7   | 8.89  |
| GAIF01033913.1 | 0.15   | 0.11   | 0      | 1.46   | 3.39  | 0.17  |
| GAIF01033914.1 | 4.43   | 2.85   | 2.29   | 12.07  | 14.89 | 4.01  |
| GAIF01033916.1 | 0.1    | 0.33   | 0.55   | 0.12   | 0.24  | 0.11  |
| GAIF01033917.1 | 0      | 0      | 0      | 0      | 0.73  | 0     |
| GAIF01033918.1 | 9.74   | 17.66  | 30.84  | 20.84  | 15.85 | 8.42  |
| GAIF01033919.1 | 3.59   | 3.95   | 3.44   | 13.26  | 10.87 | 2.16  |
| GAIF01033923.1 | 0.14   | 0.1    | 0.1    | 0.54   | 1.39  | 0.15  |
| GAIF01033924.1 | 0.13   | 0      | 0.05   | 0.25   | 2.24  | 0.23  |
| GAIF01033925.1 | 0      | 2.12   | 1.46   | 0.16   | 0     | 0.08  |
| GAIF01033926.1 | 9.05   | 7.69   | 4.92   | 8.27   | 8.9   | 0.55  |
| GAIF01033927.1 | 57.81  | 100.59 | 53     | 83.43  | 76.55 | 17.04 |
| GAIF01033928.1 | 0      | 0      | 0.09   | 0.05   | 0.85  | 0     |
| GAIF01033929.1 | 0      | 0      | 0      | 0      | 0.14  | 0     |
| GAIF01033930.1 | 12.92  | 13.24  | 25.86  | 35.3   | 40.87 | 47.82 |
| GAIF01033931.1 | 8.44   | 5.46   | 7.81   | 19.6   | 17.52 | 10.03 |
| GAIF01033932.1 | 0.05   | 0      | 0      | 0.19   | 0.06  | 0     |
| GAIF01033933.1 | 0      | 0      | 0      | 0      | 0.11  | 0.1   |
| GAIF01033934.1 | 8.03   | 12.71  | 12.51  | 39.52  | 19.9  | 7     |
| GAIF01033935.1 | 30.3   | 23.62  | 17.12  | 62.74  | 60.34 | 9.19  |
| GAIF01033936.1 | 3.69   | 2.75   | 0      | 5.95   | 14.26 | 0.91  |
| GAIF01033937.1 | 18.5   | 20.02  | 10.2   | 35.75  | 31.77 | 5.22  |
| GAIF01033938.1 | 84.94  | 24.95  | 285.35 | 1.83   | 0     | 39.94 |
| GAIF01033939.1 | 0      | 0      | 0      | 0      | 0     | 0.5   |

|                |        |        |        |        |        |         |
|----------------|--------|--------|--------|--------|--------|---------|
| GAIF01033940.1 | 0.08   | 0      | 0      | 0.39   | 1.7    | 0       |
| GAIF01033943.1 | 0      | 0      | 0      | 0.04   | 0.07   | 0       |
| GAIF01033944.1 | 0      | 0      | 0      | 0      | 0.06   | 0.35    |
| GAIF01033945.1 | 0.41   | 0.33   | 0.22   | 0      | 0      | 0       |
| GAIF01033946.1 | 5.68   | 6.25   | 2.76   | 18.05  | 13.6   | 1.14    |
| GAIF01033947.1 | 0.1    | 0.05   | 0      | 0      | 0.24   | 0       |
| GAIF01033948.1 | 16.78  | 9.59   | 9.77   | 46.88  | 101.96 | 86.35   |
| GAIF01033949.1 | 14.2   | 10.8   | 6.53   | 62.02  | 79.16  | 4.15    |
| GAIF01033950.1 | 19.34  | 4.97   | 5.35   | 20.66  | 10.5   | 4.67    |
| GAIF01033951.1 | 0.9    | 0      | 0.41   | 0      | 0.13   | 0       |
| GAIF01033954.1 | 0.17   | 0      | 0      | 0      | 0.79   | 0       |
| GAIF01033957.1 | 1.05   | 3.07   | 2.93   | 3.34   | 6.03   | 0.29    |
| GAIF01033958.1 | 2.1    | 4.69   | 1.47   | 5.59   | 8.06   | 0.55    |
| GAIF01033959.1 | 0.21   | 0.23   | 0      | 0.25   | 1.78   | 0       |
| GAIF01033960.1 | 0.27   | 0.02   | 0      | 0.11   | 0.35   | 0       |
| GAIF01033962.1 | 13.59  | 8.71   | 14.26  | 10.46  | 4.77   | 4.08    |
| GAIF01033963.1 | 5.56   | 2.13   | 1.33   | 7.19   | 13.93  | 4.48    |
| GAIF01033964.1 | 6.86   | 13.36  | 3.05   | 28.99  | 34.33  | 1.43    |
| GAIF01033965.1 | 0.3    | 0      | 0      | 0.12   | 0      | 0.11    |
| GAIF01033966.1 | 786.77 | 454.1  | 236.38 | 91.67  | 91.55  | 142.27  |
| GAIF01033967.1 | 0      | 0      | 0      | 0.62   | 2.47   | 0.4     |
| GAIF01033970.1 | 10.33  | 9.46   | 10.11  | 23.08  | 18.32  | 10.86   |
| GAIF01033971.1 | 537.64 | 573.5  | 1732.1 | 481.2  | 326.07 | 1162.68 |
| GAIF01033973.1 | 0      | 0      | 0      | 0.04   | 0.16   | 0       |
| GAIF01033974.1 | 0      | 1.14   | 0      | 0      | 0.75   | 0       |
| GAIF01033975.1 | 0.72   | 0.44   | 0      | 1.23   | 3.71   | 2.43    |
| GAIF01033976.1 | 61.55  | 73.89  | 135.78 | 70.7   | 55.46  | 172.41  |
| GAIF01033978.1 | 135.89 | 196.85 | 424.51 | 111.01 | 84.87  | 159.86  |
| GAIF01033979.1 | 0      | 19.01  | 0      | 20.29  | 63.07  | 0       |
| GAIF01033980.1 | 0      | 0.05   | 0      | 0      | 0      | 0       |
| GAIF01033981.1 | 0      | 0.05   | 0      | 0      | 0.05   | 0       |
| GAIF01033982.1 | 30.93  | 40.76  | 42.89  | 37.67  | 33.51  | 30.5    |
| GAIF01033985.1 | 66.38  | 75.67  | 97.91  | 74.69  | 38.39  | 30.34   |
| GAIF01033986.1 | 18.8   | 14.68  | 15.02  | 27.69  | 20.53  | 3.24    |
| GAIF01033987.1 | 0.34   | 0      | 0      | 0.26   | 2.45   | 0       |
| GAIF01033988.1 | 0.95   | 0.13   | 0.14   | 0.45   | 0.4    | 0.22    |
| GAIF01033990.1 | 0      | 0      | 0      | 0.15   | 0.02   | 0       |
| GAIF01033993.1 | 1.28   | 0.04   | 0.04   | 0.42   | 0.32   | 0.1     |
| GAIF01033994.1 | 24.91  | 34.05  | 35.98  | 40.46  | 44.05  | 11.54   |
| GAIF01033995.1 | 14.67  | 13.55  | 9.56   | 10.15  | 6.5    | 5.26    |
| GAIF01033997.1 | 5.91   | 3.84   | 2.54   | 1.13   | 0.7    | 0       |
| GAIF01033998.1 | 9.91   | 3.85   | 3.42   | 46.33  | 19.92  | 7.33    |
| GAIF01033999.1 | 70.32  | 69.38  | 53.71  | 102.69 | 55.46  | 22.53   |
| GAIF01034000.1 | 0      | 0.05   | 0      | 0      | 0      | 0       |

|                |        |        |        |       |        |        |
|----------------|--------|--------|--------|-------|--------|--------|
| GAIF01034001.1 | 3.18   | 3.54   | 6.01   | 1.46  | 0      | 3.57   |
| GAIF01034002.1 | 0      | 0      | 0      | 0     | 0.08   | 0      |
| GAIF01034004.1 | 1.18   | 0.64   | 0.24   | 6.16  | 18.88  | 0.08   |
| GAIF01034005.1 | 30.16  | 21.15  | 20.85  | 45.99 | 12.92  | 7.61   |
| GAIF01034006.1 | 43.94  | 32.06  | 16.65  | 79.34 | 95.08  | 18.83  |
| GAIF01034007.1 | 0.07   | 0.08   | 0.13   | 2.25  | 8.58   | 0.26   |
| GAIF01034008.1 | 57.38  | 88.59  | 152.09 | 63.29 | 49.5   | 145.44 |
| GAIF01034010.1 | 0      | 0.25   | 0      | 0     | 0      | 0      |
| GAIF01034011.1 | 0.27   | 0.36   | 0      | 0     | 0      | 0      |
| GAIF01034012.1 | 0      | 0.16   | 0      | 0     | 0.49   | 0      |
| GAIF01034013.1 | 0.33   | 0.89   | 0.72   | 1.14  | 0.39   | 1.08   |
| GAIF01034015.1 | 0      | 0      | 0      | 0     | 1.16   | 0      |
| GAIF01034017.1 | 0      | 0.18   | 0      | 0     | 0      | 0      |
| GAIF01034020.1 | 0.04   | 0      | 0      | 0.05  | 1.5    | 0      |
| GAIF01034021.1 | 4.36   | 12.31  | 7.31   | 15.72 | 24.84  | 2.78   |
| GAIF01034022.1 | 0.1    | 0      | 0      | 0.47  | 2.38   | 0      |
| GAIF01034023.1 | 194.23 | 107.33 | 52.13  | 17.41 | 14.67  | 4.82   |
| GAIF01034024.1 | 0      | 0      | 0      | 0.11  | 0      | 0      |
| GAIF01034026.1 | 0.68   | 1.11   | 0.25   | 2.64  | 6.15   | 4.76   |
| GAIF01034029.1 | 0.18   | 0.07   | 0      | 1.13  | 6.07   | 0      |
| GAIF01034030.1 | 0      | 0      | 0.08   | 0     | 0.07   | 0.07   |
| GAIF01034032.1 | 0.42   | 0      | 0      | 3.15  | 12.43  | 0.12   |
| GAIF01034034.1 | 0      | 0      | 0      | 0     | 0.36   | 0      |
| GAIF01034035.1 | 0.18   | 0      | 0.1    | 0.11  | 0.11   | 0.1    |
| GAIF01034036.1 | 4.06   | 1.13   | 0.53   | 20.69 | 76.9   | 60.33  |
| GAIF01034037.1 | 0      | 0      | 0      | 0.34  | 0.65   | 0      |
| GAIF01034038.1 | 16.74  | 16.01  | 19.58  | 91.42 | 127.81 | 14.19  |
| GAIF01034039.1 | 0      | 0      | 0      | 0     | 0.05   | 0      |
| GAIF01034040.1 | 0      | 0      | 0      | 0.04  | 0.18   | 0      |
| GAIF01034041.1 | 12.01  | 11.63  | 5.76   | 34.93 | 54.13  | 3.58   |
| GAIF01034042.1 | 10.25  | 9.72   | 21.12  | 5.48  | 1.41   | 3.57   |
| GAIF01034043.1 | 0      | 1.06   | 0      | 2.7   | 0.69   | 0.24   |
| GAIF01034044.1 | 7.71   | 13.65  | 8.83   | 8.49  | 5.73   | 0.88   |
| GAIF01034045.1 | 0.08   | 0.09   | 0      | 0.39  | 1.6    | 0      |
| GAIF01034047.1 | 0      | 0      | 0      | 0.97  | 3.56   | 1.05   |
| GAIF01034048.1 | 0      | 0.13   | 0      | 0     | 0      | 0      |
| GAIF01034049.1 | 0      | 0      | 0      | 0     | 0.14   | 0.06   |
| GAIF01034050.1 | 0      | 0      | 0      | 1.07  | 2.57   | 0      |
| GAIF01034053.1 | 0.16   | 0      | 0.09   | 0.09  | 0      | 0      |
| GAIF01034054.1 | 9.61   | 3.01   | 1.01   | 12.68 | 13.14  | 0.44   |
| GAIF01034055.1 | 5.78   | 8.46   | 4.39   | 6.53  | 4.43   | 1.04   |
| GAIF01034056.1 | 0.08   | 0      | 0      | 0     | 0      | 0      |
| GAIF01034057.1 | 0      | 0      | 0      | 0     | 2.1    | 0      |
| GAIF01034058.1 | 0.67   | 0.18   | 0      | 0.97  | 0.61   | 0      |

|                |        |       |       |        |        |        |
|----------------|--------|-------|-------|--------|--------|--------|
| GAIF01034059.1 | 7.8    | 12.39 | 18.17 | 13.69  | 8.2    | 8.83   |
| GAIF01034060.1 | 0.89   | 0.29  | 4.07  | 11.4   | 0.05   | 1.33   |
| GAIF01034062.1 | 19.34  | 20.72 | 25.58 | 52.28  | 52.42  | 28.58  |
| GAIF01034064.1 | 209.14 | 145.3 | 92.69 | 226.26 | 358.23 | 128.53 |
| GAIF01034066.1 | 1.44   | 0.26  | 0.13  | 4.05   | 16     | 0.9    |
| GAIF01034067.1 | 0      | 0     | 0     | 0      | 0.36   | 0      |
| GAIF01034068.1 | 0.14   | 0     | 0     | 0.65   | 2.18   | 0.31   |
| GAIF01034071.1 | 0      | 0.13  | 0     | 0      | 0.01   | 0      |
| GAIF01034072.1 | 1.78   | 1.6   | 0.23  | 0.24   | 0.13   | 0      |
| GAIF01034073.1 | 11.36  | 19.25 | 33.87 | 16.04  | 12.85  | 12.88  |
| GAIF01034074.1 | 18.61  | 32.84 | 35.8  | 12.86  | 17.05  | 2.48   |
| GAIF01034075.1 | 0.43   | 0.16  | 0     | 5.8    | 21.13  | 0.31   |
| GAIF01034076.1 | 0      | 0     | 0     | 0      | 0.04   | 0      |
| GAIF01034077.1 | 33.34  | 43.55 | 55.23 | 46.34  | 45.97  | 29.74  |
| GAIF01034078.1 | 2.17   | 0.17  | 0.26  | 0.09   | 0.37   | 0.68   |
| GAIF01034079.1 | 0      | 0.02  | 0     | 0      | 0.15   | 0      |
| GAIF01034084.1 | 1.72   | 0     | 0.47  | 8.33   | 18.98  | 0.32   |
| GAIF01034085.1 | 1.74   | 0.23  | 0.35  | 0.43   | 0.98   | 0.1    |
| GAIF01034086.1 | 12.18  | 11.18 | 10.07 | 40.12  | 26.1   | 3.9    |
| GAIF01034087.1 | 0      | 0.16  | 0     | 2.16   | 8.6    | 0.16   |
| GAIF01034088.1 | 40.34  | 46.04 | 7.51  | 54.58  | 41.84  | 2.51   |
| GAIF01034089.1 | 4.44   | 5.06  | 5.99  | 12.97  | 13.51  | 17.51  |
| GAIF01034091.1 | 27.41  | 46.99 | 15.55 | 23.09  | 42.82  | 3.35   |
| GAIF01034092.1 | 2.42   | 0.07  | 0.31  | 0.57   | 4.09   | 2.65   |
| GAIF01034094.1 | 0      | 0     | 0     | 0.05   | 0.23   | 0      |
| GAIF01034099.1 | 45     | 14.38 | 9.14  | 41.91  | 41.06  | 33.36  |
| GAIF01034100.1 | 0      | 0     | 0     | 0      | 0.77   | 0      |
| GAIF01034101.1 | 0.25   | 0.01  | 0     | 0.47   | 1.96   | 0      |
| GAIF01034102.1 | 0      | 0     | 0     | 0      | 0.38   | 0      |
| GAIF01034103.1 | 0      | 0     | 0     | 0      | 0.1    | 0      |
| GAIF01034104.1 | 0.64   | 0.1   | 0     | 3.62   | 20.08  | 0.05   |
| GAIF01034105.1 | 3.21   | 1.39  | 2.41  | 4.05   | 6.5    | 3.1    |
| GAIF01034106.1 | 0.03   | 0     | 0     | 0.06   | 0      | 0      |
| GAIF01034107.1 | 0.78   | 0     | 0     | 0.23   | 2.57   | 0      |
| GAIF01034109.1 | 9.24   | 3.28  | 3.12  | 13.68  | 5.41   | 1.24   |
| GAIF01034110.1 | 28.69  | 51.51 | 30.91 | 34.09  | 22.79  | 5.67   |
| GAIF01034111.1 | 1.21   | 2.49  | 0.05  | 1.02   | 2.21   | 0      |
| GAIF01034112.1 | 5.38   | 11.59 | 13.02 | 1.82   | 1.66   | 2.12   |
| GAIF01034113.1 | 19.41  | 37.53 | 32.94 | 34.68  | 28.91  | 14.27  |
| GAIF01034114.1 | 0.53   | 0     | 0     | 1.08   | 18.19  | 0      |
| GAIF01034117.1 | 0      | 0.05  | 0     | 0.03   | 0.03   | 0      |
| GAIF01034119.1 | 105.71 | 71.45 | 31.89 | 36.91  | 14.63  | 2.68   |
| GAIF01034120.1 | 0.17   | 0     | 0.09  | 0.1    | 0.81   | 0.18   |
| GAIF01034121.1 | 17.4   | 23.4  | 18.67 | 22.34  | 21.54  | 9.43   |

|                |        |        |         |        |        |        |
|----------------|--------|--------|---------|--------|--------|--------|
| GAIF01034123.1 | 0.53   | 0.11   | 0.11    | 1.52   | 1.28   | 0.48   |
| GAIF01034124.1 | 0.03   | 0      | 0.03    | 0.07   | 0.01   | 0      |
| GAIF01034125.1 | 0.14   | 0.1    | 0       | 0.04   | 0.43   | 0      |
| GAIF01034126.1 | 0.19   | 0      | 0       | 0      | 0.12   | 0      |
| GAIF01034128.1 | 0      | 0.53   | 0       | 0.13   | 0      | 0.25   |
| GAIF01034129.1 | 0.08   | 0      | 0.36    | 0      | 0      | 0      |
| GAIF01034130.1 | 0.11   | 0.05   | 0       | 0      | 0.58   | 0      |
| GAIF01034131.1 | 0      | 0.1    | 0       | 0      | 0      | 0      |
| GAIF01034133.1 | 1.5    | 1.18   | 1.1     | 6.59   | 1.3    | 3.31   |
| GAIF01034135.1 | 23.66  | 30.24  | 27.87   | 22.68  | 23.53  | 6.22   |
| GAIF01034136.1 | 1.03   | 1.58   | 1.3     | 0      | 0      | 0.02   |
| GAIF01034137.1 | 0      | 0      | 0.2     | 0      | 0.33   | 0      |
| GAIF01034138.1 | 0      | 0      | 0       | 0      | 0.35   | 0      |
| GAIF01034139.1 | 0      | 0      | 0       | 102.42 | 54.7   | 18.41  |
| GAIF01034140.1 | 179.11 | 195.59 | 162.83  | 431.52 | 223.82 | 132.61 |
| GAIF01034141.1 | 0.15   | 0      | 0       | 0      | 0.18   | 0      |
| GAIF01034143.1 | 0.42   | 0.15   | 0       | 1.61   | 4.5    | 0.31   |
| GAIF01034144.1 | 0.8    | 0.28   | 0.6     | 2.23   | 3.01   | 1.84   |
| GAIF01034145.1 | 0      | 0      | 0       | 0      | 0.08   | 0      |
| GAIF01034146.1 | 0.05   | 0      | 0       | 0.12   | 0.69   | 0      |
| GAIF01034147.1 | 0.12   | 0      | 0       | 0      | 0.07   | 0      |
| GAIF01034148.1 | 9.96   | 4.76   | 3.35    | 7.12   | 13.59  | 6.79   |
| GAIF01034149.1 | 11.47  | 9.28   | 16.41   | 16.8   | 12.95  | 11.09  |
| GAIF01034150.1 | 1.44   | 0.87   | 0.79    | 0.24   | 0.07   | 0      |
| GAIF01034152.1 | 0      | 0      | 0       | 0.18   | 0.75   | 0      |
| GAIF01034153.1 | 0.16   | 0.14   | 0       | 0      | 0      | 0      |
| GAIF01034154.1 | 0.06   | 0      | 0       | 0      | 0      | 0      |
| GAIF01034158.1 | 12.47  | 1.99   | 6.06    | 10.79  | 7.36   | 11.57  |
| GAIF01034159.1 | 7.07   | 2.97   | 1.49    | 19.37  | 30.28  | 0.62   |
| GAIF01034160.1 | 8.45   | 14.47  | 13.03   | 38.39  | 21.59  | 5.68   |
| GAIF01034161.1 | 649.44 | 695.61 | 1557.09 | 530.06 | 302.38 | 934.18 |
| GAIF01034162.1 | 5.91   | 0      | 1.2     | 3.83   | 2.5    | 19.63  |
| GAIF01034163.1 | 0.13   | 0      | 0       | 0.6    | 2.82   | 0      |
| GAIF01034164.1 | 0.53   | 0.63   | 0.27    | 3.71   | 10.1   | 0.08   |
| GAIF01034165.1 | 23.48  | 35.5   | 12.97   | 74.07  | 110.25 | 15     |
| GAIF01034166.1 | 27.37  | 19.79  | 34.93   | 26.44  | 9.69   | 8.42   |
| GAIF01034168.1 | 56.07  | 46.94  | 52.93   | 80.46  | 53.7   | 59.39  |
| GAIF01034171.1 | 12.19  | 10.64  | 12.48   | 10.72  | 14.33  | 12.41  |
| GAIF01034172.1 | 834.27 | 948.89 | 1711.6  | 0      | 1.52   | 0.7    |
| GAIF01034173.1 | 5.39   | 3.05   | 1.91    | 0      | 6.26   | 4.26   |
| GAIF01034174.1 | 8.01   | 16.98  | 4.4     | 46.1   | 41.26  | 1.58   |
| GAIF01034175.1 | 0.02   | 0.25   | 0.39    | 0.51   | 0.07   | 0.13   |
| GAIF01034176.1 | 0      | 0.15   | 0.12    | 0.34   | 0.57   | 0.07   |
| GAIF01034178.1 | 0      | 0      | 0       | 0.2    | 0.82   | 0      |

|                |        |        |        |         |         |        |
|----------------|--------|--------|--------|---------|---------|--------|
| GAIF01034179.1 | 0      | 0      | 0.04   | 0.07    | 0       | 0      |
| GAIF01034180.1 | 0.09   | 0      | 0      | 0.81    | 2.68    | 0.14   |
| GAIF01034181.1 | 0.16   | 0.83   | 0.61   | 0.41    | 1.2     | 0.72   |
| GAIF01034182.1 | 0.8    | 0.88   | 0.25   | 1.4     | 0       | 0      |
| GAIF01034183.1 | 0.13   | 0.09   | 0      | 0.83    | 3.4     | 1.63   |
| GAIF01034185.1 | 13.21  | 0.48   | 1.25   | 21.12   | 26.72   | 13.5   |
| GAIF01034186.1 | 2.96   | 2.28   | 0.5    | 7.83    | 21.28   | 1.15   |
| GAIF01034187.1 | 0      | 0      | 0      | 0       | 0.04    | 0      |
| GAIF01034188.1 | 99.29  | 82.35  | 104.83 | 5.88    | 2.64    | 7.4    |
| GAIF01034189.1 | 1.41   | 3.39   | 1.15   | 3.2     | 3.38    | 0.08   |
| GAIF01034190.1 | 0.06   | 0      | 0      | 0.07    | 0.21    | 0      |
| GAIF01034191.1 | 64.48  | 42.01  | 45.64  | 78.19   | 39.07   | 121.15 |
| GAIF01034193.1 | 0      | 0.44   | 0      | 0       | 0       | 0.28   |
| GAIF01034194.1 | 1.67   | 1.81   | 0.87   | 2.65    | 5.17    | 1.26   |
| GAIF01034195.1 | 0      | 0      | 0      | 0       | 0.53    | 0      |
| GAIF01034197.1 | 2.01   | 0.95   | 0.22   | 4.75    | 9.59    | 13.74  |
| GAIF01034198.1 | 0.04   | 0.13   | 0      | 0       | 0       | 0      |
| GAIF01034199.1 | 8.95   | 1.82   | 0.44   | 23.85   | 48.04   | 15.21  |
| GAIF01034201.1 | 25     | 24.15  | 14.57  | 16.21   | 19.82   | 13.08  |
| GAIF01034202.1 | 1.62   | 1.76   | 0.15   | 4.54    | 5.68    | 0      |
| GAIF01034203.1 | 0      | 0      | 0      | 4.82    | 0.41    | 2.91   |
| GAIF01034204.1 | 4.72   | 5.69   | 4.2    | 5.92    | 3.48    | 0.47   |
| GAIF01034205.1 | 3.64   | 2.89   | 2.92   | 11.93   | 6.56    | 2.33   |
| GAIF01034206.1 | 0      | 0.12   | 0.25   | 0       | 0       | 0.12   |
| GAIF01034207.1 | 0      | 0      | 0      | 0       | 0       | 0.15   |
| GAIF01034208.1 | 0.2    | 0.29   | 0.07   | 1.61    | 1.35    | 1.16   |
| GAIF01034209.1 | 0.54   | 0.98   | 0.4    | 0.63    | 0       | 0.2    |
| GAIF01034210.1 | 12.77  | 6.08   | 3.06   | 3.26    | 2.49    | 3.76   |
| GAIF01034213.1 | 0.07   | 0.04   | 0.16   | 0.34    | 0.22    | 0.2    |
| GAIF01034214.1 | 0.13   | 0.15   | 0.07   | 0.39    | 3.73    | 0.07   |
| GAIF01034216.1 | 72.33  | 28.93  | 34.86  | 49.66   | 16.09   | 44.95  |
| GAIF01034217.1 | 0      | 0      | 0      | 0.09    | 0.56    | 0      |
| GAIF01034218.1 | 0      | 0.19   | 0      | 1.71    | 3.19    | 0      |
| GAIF01034219.1 | 0.68   | 0.48   | 0.16   | 0.86    | 0.96    | 0.2    |
| GAIF01034224.1 | 0.45   | 0      | 0      | 0.17    | 0.16    | 0      |
| GAIF01034226.1 | 1.03   | 1.67   | 1.44   | 4.83    | 7.13    | 0.73   |
| GAIF01034229.1 | 3.5    | 1.65   | 1.89   | 1.4     | 2.39    | 0.52   |
| GAIF01034230.1 | 28.03  | 22.06  | 36.7   | 33.81   | 16.03   | 34.9   |
| GAIF01034231.1 | 0.24   | 0.2    | 0.05   | 1.69    | 3.74    | 0.16   |
| GAIF01034233.1 | 250.07 | 186.66 | 161.3  | 1527.37 | 1486.98 | 189.74 |
| GAIF01034234.1 | 1.84   | 0.17   | 0.15   | 0.36    | 0       | 0.38   |
| GAIF01034236.1 | 0      | 0      | 0.05   | 0       | 0       | 0      |
| GAIF01034238.1 | 0      | 0      | 0      | 0       | 0.1     | 0      |
| GAIF01034241.1 | 0.29   | 0.53   | 1.14   | 0.11    | 0.57    | 0      |

|                |        |        |        |       |        |        |
|----------------|--------|--------|--------|-------|--------|--------|
| GAIF01034242.1 | 0.46   | 0.09   | 0      | 0.97  | 1.7    | 4.08   |
| GAIF01034243.1 | 0.38   | 0.19   | 0.06   | 2.47  | 6.97   | 0.1    |
| GAIF01034244.1 | 0      | 0.14   | 0      | 0     | 0      | 0      |
| GAIF01034246.1 | 0.03   | 0      | 0      | 0     | 0      | 0      |
| GAIF01034247.1 | 0      | 0.17   | 0.08   | 0     | 0.51   | 0      |
| GAIF01034249.1 | 0      | 0      | 0      | 0     | 1.03   | 0      |
| GAIF01034250.1 | 0      | 0      | 0      | 0     | 0.07   | 0      |
| GAIF01034251.1 | 0      | 0.37   | 0.07   | 0     | 0      | 0      |
| GAIF01034252.1 | 1.37   | 0.75   | 0.48   | 0.65  | 0.67   | 0.34   |
| GAIF01034255.1 | 142.53 | 59.28  | 122.42 | 43.85 | 39.43  | 406.37 |
| GAIF01034256.1 | 12.42  | 20.71  | 23.16  | 12.03 | 2.51   | 8.35   |
| GAIF01034257.1 | 4.59   | 5.38   | 2.62   | 1.42  | 0.89   | 0.15   |
| GAIF01034259.1 | 0      | 0      | 0      | 0     | 0      | 0.02   |
| GAIF01034260.1 | 0      | 0      | 0      | 0     | 0      | 0.09   |
| GAIF01034261.1 | 1.05   | 0.76   | 0.89   | 0.94  | 4.47   | 0.51   |
| GAIF01034262.1 | 5.92   | 1.97   | 2.2    | 19.3  | 30.52  | 10.58  |
| GAIF01034263.1 | 34.97  | 15.14  | 110.3  | 24.97 | 19.03  | 847.75 |
| GAIF01034264.1 | 66.44  | 37.64  | 31.56  | 74.76 | 72.92  | 94.62  |
| GAIF01034267.1 | 0.51   | 0.14   | 0.18   | 1.04  | 2.23   | 0.13   |
| GAIF01034268.1 | 0.18   | 0      | 0      | 1.3   | 0.28   | 1.42   |
| GAIF01034269.1 | 0.02   | 0      | 0      | 0.02  | 0      | 0      |
| GAIF01034270.1 | 5.49   | 1.17   | 1.2    | 8.03  | 2.64   | 6.12   |
| GAIF01034271.1 | 0.46   | 0.38   | 0      | 0.98  | 3.41   | 0      |
| GAIF01034272.1 | 0      | 0      | 0      | 0     | 0.05   | 0      |
| GAIF01034273.1 | 4.14   | 0.43   | 0.11   | 6.3   | 35.36  | 11.42  |
| GAIF01034274.1 | 52.92  | 41.67  | 29     | 72.44 | 62.44  | 28.08  |
| GAIF01034275.1 | 0.51   | 0.15   | 0.06   | 0.08  | 0.58   | 0      |
| GAIF01034276.1 | 0      | 0      | 0.1    | 0     | 1.94   | 0      |
| GAIF01034277.1 | 0.13   | 0      | 0      | 0     | 0.47   | 0      |
| GAIF01034278.1 | 2.92   | 6.69   | 2.37   | 1.32  | 0.8    | 0      |
| GAIF01034279.1 | 0      | 0.03   | 0      | 0.14  | 1.98   | 0      |
| GAIF01034281.1 | 0      | 0.33   | 0      | 0.47  | 2.07   | 0      |
| GAIF01034282.1 | 30.82  | 33.59  | 18.41  | 7.33  | 3.02   | 0.3    |
| GAIF01034287.1 | 2.91   | 192.16 | 124.76 | 19.08 | 115.94 | 45.65  |
| GAIF01034288.1 | 0.05   | 0.06   | 0.03   | 0     | 0.33   | 0.15   |
| GAIF01034290.1 | 0.21   | 0      | 0      | 0.71  | 1.25   | 0.13   |
| GAIF01034291.1 | 7.01   | 5.58   | 4.39   | 13.87 | 14.43  | 6.38   |
| GAIF01034292.1 | 0      | 0      | 0      | 0.03  | 0      | 0      |
| GAIF01034293.1 | 9.59   | 4.46   | 3.68   | 15.57 | 27.9   | 16.74  |
| GAIF01034294.1 | 6.87   | 7.29   | 4.74   | 30.02 | 34.6   | 2.13   |
| GAIF01034296.1 | 2.27   | 3.36   | 0.31   | 0.99  | 2.73   | 0.03   |
| GAIF01034297.1 | 0.02   | 0      | 0      | 0.04  | 0.26   | 0      |
| GAIF01034298.1 | 0      | 0      | 0      | 0.74  | 5.35   | 0      |
| GAIF01034299.1 | 61.58  | 98.57  | 17.44  | 89.39 | 289.08 | 51.28  |

|                |        |        |        |        |        |         |
|----------------|--------|--------|--------|--------|--------|---------|
| GAIF01034300.1 | 3.56   | 0.97   | 1.46   | 1.6    | 2.97   | 0.81    |
| GAIF01034301.1 | 0.46   | 0.17   | 0.17   | 3.76   | 13.16  | 0       |
| GAIF01034302.1 | 16.12  | 6.38   | 4.58   | 31.52  | 43.51  | 7.54    |
| GAIF01034303.1 | 0      | 0      | 0      | 0      | 0.08   | 0       |
| GAIF01034304.1 | 0      | 0      | 0      | 0.24   | 0      | 0.3     |
| GAIF01034306.1 | 118.87 | 88.65  | 41.5   | 379.27 | 290.56 | 35.53   |
| GAIF01034310.1 | 0      | 0.03   | 0      | 0      | 0      | 0       |
| GAIF01034311.1 | 15.73  | 15.71  | 16.53  | 58.94  | 47.54  | 19.52   |
| GAIF01034312.1 | 1.49   | 1.25   | 0.25   | 0.67   | 1.24   | 0       |
| GAIF01034313.1 | 52.93  | 69.29  | 40.38  | 7.23   | 2.64   | 0.87    |
| GAIF01034314.1 | 0.32   | 0.52   | 0      | 2.03   | 7.25   | 0.17    |
| GAIF01034315.1 | 0.86   | 1.21   | 0.27   | 0.72   | 0.15   | 0       |
| GAIF01034316.1 | 0.52   | 1.18   | 0.18   | 6.93   | 13.25  | 0.18    |
| GAIF01034317.1 | 0.56   | 0      | 0      | 2.08   | 4.45   | 2.97    |
| GAIF01034318.1 | 0.16   | 0.09   | 0      | 1.24   | 1.58   | 5.44    |
| GAIF01034319.1 | 0.56   | 0.61   | 2.77   | 1.63   | 0.67   | 0.31    |
| GAIF01034323.1 | 3.63   | 12.38  | 6.08   | 1.17   | 0.73   | 0.33    |
| GAIF01034325.1 | 11.36  | 11.65  | 8.23   | 41.28  | 53.6   | 7.91    |
| GAIF01034326.1 | 13.8   | 16.38  | 17.08  | 31.07  | 37.33  | 10.43   |
| GAIF01034327.1 | 0.26   | 0      | 0      | 0      | 0      | 0       |
| GAIF01034328.1 | 4.97   | 5.03   | 0.62   | 15.79  | 17.78  | 0.05    |
| GAIF01034329.1 | 616.08 | 336.68 | 448.84 | 406.74 | 373.95 | 2285.78 |
| GAIF01034330.1 | 0.12   | 0      | 0      | 0      | 1.5    | 0       |
| GAIF01034331.1 | 1.43   | 1.05   | 1.73   | 3.61   | 5.15   | 2.53    |
| GAIF01034333.1 | 0.08   | 0      | 0      | 0      | 0.09   | 0.09    |
| GAIF01034334.1 | 0      | 0      | 0      | 0      | 0.06   | 0       |
| GAIF01034335.1 | 111.85 | 91.99  | 51.95  | 165.51 | 179.44 | 117.22  |
| GAIF01034337.1 | 0.12   | 0.13   | 0      | 2.23   | 11.68  | 0.66    |
| GAIF01034339.1 | 21.82  | 10.2   | 17.09  | 10.04  | 9.28   | 2.13    |
| GAIF01034341.1 | 0      | 0.01   | 0      | 0      | 1.3    | 1.11    |
| GAIF01034342.1 | 0      | 0.06   | 0      | 0.06   | 0.12   | 0       |
| GAIF01034343.1 | 0.92   | 0.24   | 1.07   | 1.49   | 0.95   | 1.53    |
| GAIF01034344.1 | 0.26   | 0.1    | 0      | 0.41   | 1.48   | 0       |
| GAIF01034345.1 | 0      | 0.08   | 0      | 0.09   | 0.56   | 0       |
| GAIF01034347.1 | 0.12   | 0      | 0      | 0      | 0      | 0       |
| GAIF01034349.1 | 0.14   | 0.15   | 0.23   | 0.12   | 1.25   | 0       |
| GAIF01034350.1 | 0.4    | 0      | 0      | 0.92   | 2.44   | 2.5     |
| GAIF01034355.1 | 0      | 0.21   | 0      | 0.55   | 2.1    | 0       |
| GAIF01034356.1 | 0.1    | 0.19   | 0      | 0.03   | 0.06   | 0       |
| GAIF01034357.1 | 0      | 0      | 0      | 0.3    | 0      | 0       |
| GAIF01034358.1 | 25.74  | 29.85  | 20.19  | 41.05  | 42.54  | 18.96   |
| GAIF01034359.1 | 47.3   | 26.15  | 34.77  | 106.59 | 166.48 | 291.83  |
| GAIF01034362.1 | 6.66   | 2.75   | 1.51   | 0      | 0.14   | 0       |
| GAIF01034364.1 | 0      | 0      | 0      | 0.19   | 0      | 0       |



|                |        |        |        |        |        |       |
|----------------|--------|--------|--------|--------|--------|-------|
| GAIF01034365.1 | 0      | 0      | 0      | 0.06   | 0      | 0     |
| GAIF01034366.1 | 0      | 0.11   | 0      | 0.06   | 0      | 0     |
| GAIF01034367.1 | 18.39  | 11.68  | 2.45   | 54.86  | 45.93  | 0.45  |
| GAIF01034368.1 | 57.86  | 54.22  | 105.71 | 60.74  | 35.47  | 32.76 |
| GAIF01034369.1 | 0.1    | 0      | 0      | 0.11   | 0.42   | 0     |
| GAIF01034370.1 | 2.75   | 5.36   | 5.13   | 0      | 0      | 0     |
| GAIF01034371.1 | 0      | 2.45   | 4.66   | 0      | 0.1    | 0.18  |
| GAIF01034372.1 | 4.08   | 1.98   | 1.12   | 13.69  | 32.16  | 7.71  |
| GAIF01034374.1 | 0      | 0      | 0      | 0      | 0.13   | 0.04  |
| GAIF01034375.1 | 0.07   | 0.16   | 0      | 0      | 0.53   | 0     |
| GAIF01034376.1 | 13.21  | 7.73   | 8.49   | 24.67  | 33.19  | 8.74  |
| GAIF01034377.1 | 3.41   | 6.17   | 1.29   | 12.49  | 23.71  | 1.02  |
| GAIF01034379.1 | 29.36  | 24.55  | 20.14  | 33.33  | 29.55  | 69.89 |
| GAIF01034380.1 | 9.88   | 9.43   | 3.59   | 15.27  | 16.65  | 0.7   |
| GAIF01034381.1 | 133.37 | 83.42  | 62.14  | 7.68   | 5.22   | 14.88 |
| GAIF01034382.1 | 1.65   | 1.02   | 0.21   | 2.11   | 1.32   | 0.38  |
| GAIF01034384.1 | 0.09   | 0      | 0      | 0.9    | 0.21   | 0     |
| GAIF01034385.1 | 2.26   | 2.09   | 0.8    | 0.71   | 0.34   | 0     |
| GAIF01034386.1 | 4.9    | 1.51   | 0.46   | 3.43   | 2.88   | 0.16  |
| GAIF01034387.1 | 0      | 0      | 0      | 0      | 0.81   | 0     |
| GAIF01034388.1 | 0.18   | 0      | 0      | 0.26   | 1.31   | 0     |
| GAIF01034390.1 | 0.03   | 0      | 0      | 0.38   | 0      | 0     |
| GAIF01034391.1 | 0.11   | 0      | 0      | 0      | 0      | 0     |
| GAIF01034392.1 | 37.07  | 62.18  | 26     | 71.51  | 66.45  | 5.99  |
| GAIF01034393.1 | 0.25   | 0.14   | 0      | 0.29   | 0      | 0     |
| GAIF01034394.1 | 0      | 0      | 0      | 0      | 0.05   | 0     |
| GAIF01034395.1 | 293.65 | 431.32 | 170.03 | 279.93 | 314.04 | 45.69 |
| GAIF01034396.1 | 0      | 0      | 0.07   | 0.36   | 1.35   | 0.28  |
| GAIF01034397.1 | 0.08   | 0      | 0      | 0.03   | 0      | 0     |
| GAIF01034398.1 | 10.59  | 5.62   | 7.91   | 19.24  | 9.59   | 11.45 |
| GAIF01034400.1 | 1.38   | 1.67   | 0.28   | 1.19   | 2.4    | 0.11  |
| GAIF01034401.1 | 0.03   | 0      | 0      | 0      | 0.04   | 0     |
| GAIF01034402.1 | 175.12 | 186.55 | 68.29  | 176.43 | 260.94 | 39.95 |
| GAIF01034403.1 | 0      | 0.82   | 0.25   | 0.09   | 0.09   | 0.5   |
| GAIF01034404.1 | 14.76  | 13.98  | 12.77  | 32.02  | 18.73  | 8.13  |
| GAIF01034405.1 | 0.09   | 0      | 0      | 0      | 0      | 0     |
| GAIF01034406.1 | 0      | 0      | 0      | 0      | 0.03   | 0     |
| GAIF01034407.1 | 0.23   | 0.25   | 0.05   | 0.47   | 0.43   | 0.05  |
| GAIF01034408.1 | 61.07  | 63.27  | 47.91  | 40.69  | 25.11  | 6.25  |
| GAIF01034409.1 | 22.74  | 14.73  | 26.22  | 16.72  | 7.98   | 13.47 |
| GAIF01034412.1 | 28.45  | 37.51  | 26.63  | 62.15  | 59.57  | 6.91  |
| GAIF01034413.1 | 35.44  | 21.13  | 9.04   | 16.94  | 25.09  | 45.22 |
| GAIF01034415.1 | 5.58   | 0      | 0      | 180.02 | 427.35 | 0.02  |
| GAIF01034416.1 | 0      | 0      | 0      | 0.44   | 0.22   | 2.37  |

|                |       |        |        |        |        |        |
|----------------|-------|--------|--------|--------|--------|--------|
| GAIF01034418.1 | 13.48 | 3.54   | 2.41   | 19.95  | 17.76  | 3.51   |
| GAIF01034419.1 | 75.27 | 44.01  | 32.89  | 133.7  | 148.7  | 14.82  |
| GAIF01034420.1 | 7.88  | 10.18  | 7.72   | 42.02  | 45.16  | 4.49   |
| GAIF01034421.1 | 0.3   | 0.33   | 0      | 0      | 0.16   | 0      |
| GAIF01034422.1 | 0.09  | 0      | 0.05   | 0.1    | 0.57   | 0.02   |
| GAIF01034424.1 | 0     | 0      | 0      | 0      | 0.29   | 0      |
| GAIF01034425.1 | 0     | 0.23   | 0      | 5.78   | 12.81  | 0      |
| GAIF01034426.1 | 0     | 0      | 0      | 0      | 0.29   | 0      |
| GAIF01034427.1 | 0     | 0      | 0      | 0      | 0.4    | 0      |
| GAIF01034428.1 | 2.52  | 2.53   | 2.56   | 5.53   | 6.06   | 0.49   |
| GAIF01034429.1 | 11.02 | 1.14   | 0.54   | 16.3   | 64.75  | 9.21   |
| GAIF01034430.1 | 28.85 | 21.25  | 8.31   | 60.5   | 17.75  | 5      |
| GAIF01034431.1 | 0     | 0      | 0.11   | 6.11   | 11.12  | 0      |
| GAIF01034432.1 | 0     | 0      | 0.12   | 0      | 0      | 0      |
| GAIF01034433.1 | 0.13  | 0      | 0      | 0      | 0      | 0.15   |
| GAIF01034435.1 | 6.99  | 13.25  | 12.74  | 6.52   | 8.63   | 2.54   |
| GAIF01034436.1 | 9.46  | 10.01  | 0      | 12.08  | 1.93   | 23.58  |
| GAIF01034438.1 | 12.24 | 0.17   | 0      | 0.89   | 0      | 0      |
| GAIF01034439.1 | 0     | 0      | 0      | 0      | 0.73   | 0      |
| GAIF01034440.1 | 0     | 0      | 0.1    | 0.07   | 0.18   | 0      |
| GAIF01034441.1 | 0.2   | 0.36   | 0.29   | 0.46   | 0.08   | 1.68   |
| GAIF01034442.1 | 82.06 | 19.72  | 38.83  | 105.81 | 107.37 | 517.73 |
| GAIF01034443.1 | 48.19 | 17.88  | 14.55  | 108.51 | 219.78 | 490.26 |
| GAIF01034445.1 | 1.19  | 0.74   | 0.74   | 0.1    | 0      | 0      |
| GAIF01034447.1 | 1.64  | 0.47   | 0      | 2.76   | 1.64   | 0.75   |
| GAIF01034448.1 | 1.29  | 0.14   | 0      | 0.98   | 0      | 0.01   |
| GAIF01034449.1 | 0     | 0.09   | 0      | 0.05   | 0      | 0      |
| GAIF01034450.1 | 17.99 | 36.89  | 51.08  | 10.62  | 10.04  | 12.9   |
| GAIF01034451.1 | 0.2   | 0.24   | 0.07   | 0.33   | 1.13   | 0.09   |
| GAIF01034452.1 | 0     | 0      | 0.84   | 0      | 0      | 0.17   |
| GAIF01034454.1 | 0.23  | 0      | 0      | 0      | 0      | 0      |
| GAIF01034455.1 | 0     | 0      | 0      | 0.26   | 0.87   | 0      |
| GAIF01034456.1 | 0     | 0      | 0      | 0      | 0.06   | 0.16   |
| GAIF01034458.1 | 0.08  | 0.08   | 0.18   | 1.63   | 6.91   | 0.08   |
| GAIF01034459.1 | 46.85 | 19.64  | 22.82  | 59.06  | 77.99  | 323.06 |
| GAIF01034462.1 | 108.7 | 137.86 | 138.58 | 104.73 | 98.04  | 67.46  |
| GAIF01034463.1 | 0.95  | 0.97   | 0      | 19.06  | 81.81  | 0      |
| GAIF01034464.1 | 0.1   | 0.03   | 0      | 0.34   | 0.14   | 0.19   |
| GAIF01034465.1 | 19.35 | 19.26  | 22.05  | 54.71  | 42.02  | 7.62   |
| GAIF01034466.1 | 0.29  | 0      | 0      | 0.68   | 0.52   | 0      |
| GAIF01034468.1 | 0     | 0.11   | 0      | 0      | 0      | 0      |
| GAIF01034469.1 | 0     | 0      | 0      | 0.57   | 4.53   | 0      |
| GAIF01034470.1 | 0.5   | 0.73   | 0.05   | 0.53   | 1.05   | 0.14   |
| GAIF01034471.1 | 14.77 | 3.32   | 0.45   | 12.16  | 16.97  | 1.55   |

|                |       |       |        |        |        |        |
|----------------|-------|-------|--------|--------|--------|--------|
| GAIF01034472.1 | 0.33  | 0.25  | 0      | 1.24   | 2.41   | 0      |
| GAIF01034473.1 | 0     | 0     | 0      | 0.11   | 0      | 0      |
| GAIF01034474.1 | 53.37 | 71.6  | 84.96  | 225.97 | 171.27 | 109.32 |
| GAIF01034476.1 | 0     | 0     | 0      | 0      | 0.45   | 0      |
| GAIF01034479.1 | 0     | 2.62  | 4.19   | 0      | 0.36   | 0.33   |
| GAIF01034480.1 | 0     | 0     | 0      | 1.42   | 0.87   | 0      |
| GAIF01034481.1 | 0.18  | 0     | 0.07   | 0.21   | 0.14   | 0.26   |
| GAIF01034482.1 | 0     | 1.18  | 1.43   | 0      | 0      | 0.24   |
| GAIF01034483.1 | 0.67  | 0     | 0      | 3.5    | 13.44  | 0.76   |
| GAIF01034484.1 | 0.46  | 0.04  | 0.04   | 1.77   | 9.57   | 0.04   |
| GAIF01034485.1 | 43.99 | 31.06 | 37.21  | 128.76 | 163.97 | 77.41  |
| GAIF01034487.1 | 51.34 | 50.78 | 32.9   | 81.48  | 78.17  | 142.51 |
| GAIF01034488.1 | 0     | 0     | 0.06   | 0      | 0      | 0.99   |
| GAIF01034489.1 | 0.16  | 0.12  | 0.23   | 0.62   | 0.64   | 0.23   |
| GAIF01034490.1 | 47.28 | 57.09 | 90.04  | 204.52 | 170.15 | 72.46  |
| GAIF01034491.1 | 21.25 | 25.35 | 19.81  | 57.48  | 46.3   | 5.13   |
| GAIF01034492.1 | 0     | 18.77 | 4.97   | 16.89  | 5.92   | 6.01   |
| GAIF01034493.1 | 1.61  | 0.95  | 0.48   | 0.37   | 0.42   | 0.97   |
| GAIF01034494.1 | 0.38  | 0     | 0      | 0.73   | 1.71   | 0.28   |
| GAIF01034495.1 | 22.74 | 17.08 | 24.15  | 25.21  | 20.12  | 115.91 |
| GAIF01034497.1 | 84.52 | 82.21 | 160.68 | 202.35 | 73.62  | 44.25  |
| GAIF01034498.1 | 10.62 | 14.04 | 2.95   | 20.02  | 34.75  | 3.23   |
| GAIF01034499.1 | 25.78 | 8.56  | 17.7   | 10.29  | 0      | 16.98  |
| GAIF01034501.1 | 47.97 | 39.52 | 45.5   | 27.57  | 19.03  | 16.69  |
| GAIF01034504.1 | 0.29  | 0.77  | 0      | 0.01   | 0      | 0.09   |
| GAIF01034505.1 | 0     | 0.05  | 0      | 0.14   | 2.11   | 0.13   |
| GAIF01034506.1 | 5.29  | 2.12  | 3.93   | 1.56   | 0.36   | 1.3    |
| GAIF01034507.1 | 0     | 0.22  | 0      | 0      | 0.58   | 0      |
| GAIF01034508.1 | 0     | 1.71  | 6.96   | 0      | 0      | 29.64  |
| GAIF01034510.1 | 0.18  | 0.23  | 0.1    | 0      | 0.04   | 0.03   |
| GAIF01034512.1 | 3.88  | 2.89  | 4.97   | 2.74   | 2.26   | 4.32   |
| GAIF01034513.1 | 0     | 0.62  | 0.88   | 0      | 0.21   | 0      |
| GAIF01034514.1 | 12.25 | 11.17 | 21     | 28.33  | 21.65  | 17.66  |
| GAIF01034515.1 | 0     | 0     | 0      | 0.1    | 0.1    | 0      |
| GAIF01034518.1 | 0.24  | 0.27  | 0      | 2.84   | 14.11  | 2.16   |
| GAIF01034519.1 | 0.45  | 0.25  | 0      | 1.97   | 5.86   | 1      |
| GAIF01034520.1 | 1.32  | 0     | 0.21   | 1.64   | 7.88   | 5.3    |
| GAIF01034521.1 | 0     | 0.17  | 0      | 0      | 0      | 0      |
| GAIF01034522.1 | 1.37  | 2.98  | 2.42   | 4.43   | 3.06   | 0.86   |
| GAIF01034523.1 | 0     | 0     | 0.82   | 0      | 0.95   | 0.65   |
| GAIF01034524.1 | 0     | 0.16  | 0      | 0.75   | 0.17   | 0      |
| GAIF01034525.1 | 5.17  | 0     | 1.23   | 0.87   | 0      | 0.14   |
| GAIF01034526.1 | 4.87  | 6.45  | 5.25   | 14.07  | 10.73  | 3.43   |
| GAIF01034527.1 | 25.29 | 31.81 | 32.47  | 82.17  | 68.39  | 11.38  |

|                |        |       |       |        |        |        |
|----------------|--------|-------|-------|--------|--------|--------|
| GAIF01034528.1 | 0.26   | 0.47  | 1.34  | 0.5    | 1.03   | 0.18   |
| GAIF01034529.1 | 0.52   | 0.28  | 0     | 2.88   | 11.15  | 1.01   |
| GAIF01034531.1 | 0      | 0     | 0     | 0      | 0.21   | 0      |
| GAIF01034532.1 | 86.92  | 77.46 | 78.16 | 115.75 | 57.29  | 34.89  |
| GAIF01034534.1 | 0.11   | 0.23  | 0.1   | 0.52   | 1.74   | 0      |
| GAIF01034535.1 | 0      | 0     | 0     | 4.88   | 0      | 0      |
| GAIF01034537.1 | 0      | 0     | 0     | 0.1    | 1.19   | 0.2    |
| GAIF01034538.1 | 0      | 0     | 0     | 0      | 0      | 0.03   |
| GAIF01034539.1 | 0.06   | 0.07  | 0     | 0.07   | 0.15   | 0.14   |
| GAIF01034541.1 | 39.5   | 27.29 | 15.12 | 238.97 | 138.18 | 33.7   |
| GAIF01034544.1 | 0.03   | 0     | 0     | 0      | 0.04   | 0.03   |
| GAIF01034547.1 | 0.39   | 0.21  | 0     | 0.8    | 5.32   | 0.43   |
| GAIF01034551.1 | 20     | 23.77 | 19.83 | 21.61  | 30.2   | 108.55 |
| GAIF01034552.1 | 0      | 0     | 0     | 0.1    | 0.11   | 0      |
| GAIF01034553.1 | 0.51   | 0     | 0     | 1.18   | 7.56   | 0.75   |
| GAIF01034554.1 | 110.94 | 45.99 | 72.28 | 98.12  | 45.82  | 22.29  |
| GAIF01034555.1 | 0.58   | 0.08  | 9.46  | 5      | 2.46   | 32.18  |
| GAIF01034557.1 | 7.65   | 2.36  | 2.43  | 4.99   | 4.97   | 2.66   |
| GAIF01034558.1 | 0.03   | 0     | 0     | 0      | 0.01   | 0      |
| GAIF01034559.1 | 1.09   | 0.79  | 1.2   | 1.41   | 0.44   | 0.27   |
| GAIF01034560.1 | 27.24  | 38.53 | 33.16 | 70.92  | 53.83  | 23.66  |
| GAIF01034561.1 | 16     | 13.55 | 25.39 | 45.05  | 19.76  | 19.82  |
| GAIF01034562.1 | 0.78   | 1.18  | 0.34  | 0.54   | 1.87   | 0      |
| GAIF01034563.1 | 10.02  | 11.85 | 5.92  | 31.55  | 34.12  | 2.95   |
| GAIF01034564.1 | 0.12   | 0.09  | 0     | 0.05   | 0      | 0      |
| GAIF01034567.1 | 0      | 0     | 0     | 0.18   | 0.12   | 0      |
| GAIF01034568.1 | 0      | 0.21  | 0.03  | 1.37   | 2.84   | 0.11   |
| GAIF01034570.1 | 0.26   | 0.14  | 0     | 1.38   | 4.3    | 0      |
| GAIF01034571.1 | 0.72   | 0.22  | 0     | 3.56   | 14.4   | 1.02   |
| GAIF01034573.1 | 0      | 0     | 0.58  | 0      | 0      | 0      |
| GAIF01034574.1 | 1.32   | 0.91  | 0.52  | 5.92   | 12.21  | 7.72   |
| GAIF01034575.1 | 0      | 0     | 0     | 0.1    | 0.04   | 0      |
| GAIF01034577.1 | 0      | 0.08  | 0     | 0.08   | 0      | 0      |
| GAIF01034578.1 | 0.63   | 0.14  | 0     | 2.63   | 11.81  | 0.28   |
| GAIF01034580.1 | 7.09   | 5.35  | 5.02  | 11.55  | 14.86  | 9.58   |
| GAIF01034581.1 | 68.67  | 4.94  | 4.57  | 16.58  | 27.53  | 64.63  |
| GAIF01034582.1 | 0.28   | 0.18  | 0.3   | 0.83   | 1.4    | 0.12   |
| GAIF01034583.1 | 0      | 0.06  | 0.2   | 0      | 0.06   | 0.06   |
| GAIF01034585.1 | 0      | 0     | 0     | 0      | 0      | 0.11   |
| GAIF01034586.1 | 0      | 0     | 0     | 0      | 0.15   | 0      |
| GAIF01034588.1 | 0.97   | 0.33  | 0.13  | 0.14   | 0.44   | 0.07   |
| GAIF01034589.1 | 65.57  | 58.69 | 25.66 | 45.38  | 30.43  | 8.23   |
| GAIF01034590.1 | 0.33   | 0.36  | 0.18  | 2.07   | 3.71   | 0.19   |
| GAIF01034593.1 | 0.06   | 0     | 0     | 0.3    | 1.41   | 0      |

|                |        |        |        |        |        |        |
|----------------|--------|--------|--------|--------|--------|--------|
| GAIF01034594.1 | 0      | 0      | 0      | 0.1    | 1.66   | 0      |
| GAIF01034596.1 | 0      | 0      | 0      | 0      | 0.67   | 0      |
| GAIF01034597.1 | 0.23   | 0      | 0      | 0      | 0      | 0      |
| GAIF01034599.1 | 0.07   | 0      | 0      | 0      | 0.04   | 0      |
| GAIF01034600.1 | 12.5   | 21.75  | 26.55  | 24.52  | 11.17  | 14.63  |
| GAIF01034601.1 | 29.61  | 30.88  | 32.14  | 54.42  | 31.9   | 14.8   |
| GAIF01034602.1 | 5.97   | 3.16   | 3.28   | 0      | 0      | 25.56  |
| GAIF01034603.1 | 0.09   | 0.25   | 0      | 0      | 0      | 0      |
| GAIF01034604.1 | 0.02   | 0.02   | 0      | 0.11   | 0.46   | 0      |
| GAIF01034606.1 | 1.11   | 0.44   | 0      | 0      | 1.33   | 0      |
| GAIF01034607.1 | 22.61  | 36.04  | 54.94  | 33.2   | 15.29  | 20.82  |
| GAIF01034609.1 | 0      | 0      | 0      | 0.32   | 0.08   | 0      |
| GAIF01034611.1 | 0.55   | 0      | 0      | 0      | 1.33   | 0      |
| GAIF01034612.1 | 4.27   | 2.88   | 3.96   | 2.34   | 0.8    | 2.81   |
| GAIF01034614.1 | 0.17   | 0.19   | 0.11   | 1.62   | 1.41   | 0.23   |
| GAIF01034615.1 | 0.11   | 0.12   | 0.08   | 0.3    | 0.84   | 0      |
| GAIF01034616.1 | 0.14   | 0      | 0      | 0      | 0      | 0      |
| GAIF01034617.1 | 18.86  | 21.31  | 29.56  | 41.65  | 35.63  | 18.42  |
| GAIF01034620.1 | 11.68  | 7.88   | 7.65   | 41.75  | 45.44  | 6.42   |
| GAIF01034622.1 | 0.2    | 0.09   | 0      | 0      | 0.38   | 0      |
| GAIF01034623.1 | 0      | 0      | 0.62   | 0      | 0      | 0      |
| GAIF01034624.1 | 0.3    | 0.13   | 0.4    | 0.77   | 3.55   | 1.73   |
| GAIF01034625.1 | 0.24   | 0      | 0      | 0      | 1.24   | 0      |
| GAIF01034626.1 | 39.72  | 39.56  | 29.9   | 69.39  | 51.69  | 28.22  |
| GAIF01034627.1 | 141.92 | 199.55 | 255.28 | 200.01 | 164.61 | 138.02 |
| GAIF01034628.1 | 2.72   | 2.6    | 1.27   | 6.23   | 4.99   | 1.21   |
| GAIF01034630.1 | 20.93  | 11.58  | 13.6   | 1.15   | 0      | 3.41   |
| GAIF01034632.1 | 12.98  | 16.84  | 8.42   | 2.71   | 5.57   | 0.86   |
| GAIF01034633.1 | 27.98  | 14.46  | 13.29  | 25.43  | 22.38  | 18.66  |
| GAIF01034634.1 | 31.45  | 9.26   | 7.79   | 21.6   | 22.72  | 27.75  |
| GAIF01034636.1 | 0      | 0      | 0      | 0      | 0.04   | 0      |
| GAIF01034637.1 | 0      | 0.25   | 0      | 0.48   | 1.29   | 0      |
| GAIF01034638.1 | 31.01  | 16.77  | 27.72  | 22.25  | 20.21  | 24.27  |
| GAIF01034639.1 | 1.5    | 0.59   | 0      | 2.53   | 15.54  | 6.3    |
| GAIF01034640.1 | 0      | 0      | 0      | 0.21   | 0.22   | 0      |
| GAIF01034642.1 | 231.16 | 73.25  | 46.36  | 432.72 | 97.86  | 6.46   |
| GAIF01034643.1 | 0      | 0      | 0      | 0      | 0.3    | 0      |
| GAIF01034644.1 | 2.94   | 5.62   | 0.57   | 4.99   | 10.33  | 1.33   |
| GAIF01034645.1 | 18.05  | 19.98  | 6.75   | 68.41  | 52.63  | 3.65   |
| GAIF01034646.1 | 50.65  | 54.34  | 7.35   | 1.11   | 1.32   | 59.3   |
| GAIF01034647.1 | 1.74   | 6.81   | 5.35   | 8.2    | 11.97  | 0.44   |
| GAIF01034648.1 | 17.16  | 27.83  | 13.24  | 45.85  | 40.38  | 9.51   |
| GAIF01034649.1 | 3.47   | 0.63   | 0.19   | 6.45   | 17.95  | 10.33  |
| GAIF01034650.1 | 0.01   | 0      | 0      | 0.27   | 0      | 0      |

|                |       |       |        |       |       |        |
|----------------|-------|-------|--------|-------|-------|--------|
| GAIF01034651.1 | 0.37  | 0     | 0      | 0.85  | 0.22  | 0.4    |
| GAIF01034653.1 | 0     | 0.1   | 0      | 0     | 0     | 0.03   |
| GAIF01034654.1 | 0.81  | 1.58  | 2.37   | 0.8   | 1.36  | 2.82   |
| GAIF01034655.1 | 1.07  | 1.29  | 0.13   | 0.83  | 6.01  | 0.13   |
| GAIF01034656.1 | 9.52  | 11.05 | 5.52   | 32.63 | 31.65 | 5.16   |
| GAIF01034658.1 | 10.78 | 18.33 | 11.54  | 7.15  | 6.27  | 1      |
| GAIF01034659.1 | 0     | 0.05  | 0      | 0.18  | 0.19  | 0      |
| GAIF01034660.1 | 0     | 0     | 0      | 0     | 0.47  | 0      |
| GAIF01034663.1 | 0.77  | 0.37  | 0.19   | 1.4   | 5.28  | 1.8    |
| GAIF01034664.1 | 0.35  | 0     | 0.13   | 0.41  | 5.11  | 0.13   |
| GAIF01034665.1 | 0.14  | 0.15  | 0      | 0.97  | 4.45  | 0      |
| GAIF01034666.1 | 0     | 0     | 0      | 0.71  | 0.93  | 0      |
| GAIF01034667.1 | 0     | 0.04  | 0.07   | 0.37  | 0.58  | 0      |
| GAIF01034668.1 | 6.34  | 5.12  | 4.98   | 15.03 | 8.16  | 3.31   |
| GAIF01034669.1 | 0.33  | 0     | 0      | 0.38  | 0.5   | 0      |
| GAIF01034672.1 | 37.15 | 46.85 | 51.4   | 27.8  | 31.88 | 52.74  |
| GAIF01034673.1 | 0     | 0     | 0      | 0     | 0.02  | 0      |
| GAIF01034674.1 | 0     | 0.07  | 0.21   | 0     | 0     | 0      |
| GAIF01034675.1 | 0     | 0.15  | 0      | 0.32  | 0.84  | 0      |
| GAIF01034676.1 | 2.72  | 2.27  | 3.47   | 6.32  | 11.57 | 2.51   |
| GAIF01034677.1 | 0.53  | 0.23  | 0.35   | 0     | 0     | 0.35   |
| GAIF01034678.1 | 17.54 | 14.36 | 10.21  | 15.69 | 27.44 | 34.23  |
| GAIF01034679.1 | 0.44  | 0.16  | 0      | 0.51  | 1.4   | 0      |
| GAIF01034682.1 | 0     | 0     | 0      | 0.05  | 0     | 0      |
| GAIF01034683.1 | 0.45  | 0.1   | 0.2    | 0.1   | 0.11  | 0.1    |
| GAIF01034684.1 | 3.72  | 1.85  | 0.8    | 11.92 | 25.03 | 0.49   |
| GAIF01034685.1 | 6.37  | 5.54  | 6.87   | 14.52 | 7.62  | 6.02   |
| GAIF01034686.1 | 0.64  | 0.26  | 0.53   | 0.84  | 0.1   | 0.09   |
| GAIF01034687.1 | 0.55  | 0.15  | 0      | 0.16  | 0     | 0      |
| GAIF01034688.1 | 0.04  | 0.12  | 0.3    | 0.21  | 0.28  | 0      |
| GAIF01034689.1 | 0.09  | 0.2   | 0.1    | 1.41  | 6.94  | 0.15   |
| GAIF01034690.1 | 0     | 0     | 0      | 0     | 0.28  | 0      |
| GAIF01034692.1 | 0.11  | 0.03  | 0.06   | 0     | 0.7   | 0.03   |
| GAIF01034693.1 | 3.73  | 8.41  | 3.07   | 1.51  | 0.67  | 0      |
| GAIF01034694.1 | 0     | 0     | 0.26   | 0     | 0     | 0      |
| GAIF01034695.1 | 4.32  | 12.29 | 6.74   | 12.76 | 15.69 | 1      |
| GAIF01034697.1 | 1.36  | 1.61  | 0.78   | 0.34  | 0     | 0      |
| GAIF01034701.1 | 0     | 0     | 0      | 0.33  | 0.94  | 0      |
| GAIF01034702.1 | 0     | 0     | 0      | 0     | 0     | 0.14   |
| GAIF01034703.1 | 1.96  | 0.45  | 0.23   | 2.39  | 1.98  | 0.11   |
| GAIF01034704.1 | 0.25  | 0.8   | 0.27   | 1.14  | 2.95  | 0.27   |
| GAIF01034705.1 | 19.25 | 21.7  | 35.1   | 21.41 | 11.57 | 18.32  |
| GAIF01034706.1 | 0.34  | 0.11  | 0      | 2.26  | 6.3   | 0.19   |
| GAIF01034707.1 | 41.83 | 26.67 | 113.27 | 65.18 | 47.59 | 138.85 |

|                |       |        |       |        |        |       |
|----------------|-------|--------|-------|--------|--------|-------|
| GAIF01034708.1 | 16.14 | 15.96  | 15.22 | 37.4   | 25.82  | 9.71  |
| GAIF01034709.1 | 0.14  | 0      | 0     | 0.8    | 4.33   | 0.15  |
| GAIF01034710.1 | 0     | 0      | 0     | 0.06   | 0.06   | 0     |
| GAIF01034714.1 | 19.6  | 18.55  | 4.08  | 34.56  | 45.05  | 1.67  |
| GAIF01034715.1 | 9.9   | 9.1    | 9.52  | 25.81  | 21.53  | 5.12  |
| GAIF01034717.1 | 0     | 0.07   | 0     | 0      | 0      | 0     |
| GAIF01034718.1 | 0     | 0      | 0     | 0      | 0.11   | 0     |
| GAIF01034720.1 | 45.52 | 29.37  | 20.75 | 104.27 | 103.51 | 23.77 |
| GAIF01034721.1 | 0     | 0      | 0     | 0.39   | 0.47   | 0     |
| GAIF01034722.1 | 0.28  | 0.2    | 0     | 1.74   | 7.55   | 0.1   |
| GAIF01034723.1 | 0.2   | 0.22   | 0     | 0.41   | 0.15   | 0     |
| GAIF01034725.1 | 64.07 | 117.78 | 61.48 | 139.47 | 115.57 | 10.33 |
| GAIF01034726.1 | 7.28  | 3.41   | 6.02  | 8.75   | 13.79  | 57.14 |
| GAIF01034727.1 | 0.03  | 0      | 0     | 0      | 0.02   | 0.02  |
| GAIF01034729.1 | 52.44 | 27.34  | 18.87 | 63.45  | 41.51  | 6.9   |
| GAIF01034730.1 | 22.56 | 34.58  | 24.09 | 39.28  | 45.15  | 78.04 |
| GAIF01034731.1 | 0.11  | 0      | 0     | 0      | 0      | 0     |
| GAIF01034735.1 | 0.93  | 0.25   | 0.13  | 3.09   | 21.88  | 0.89  |
| GAIF01034737.1 | 0     | 0.07   | 0     | 0.18   | 0      | 0.07  |
| GAIF01034738.1 | 9.74  | 11.97  | 5.22  | 1.61   | 0.98   | 0     |
| GAIF01034740.1 | 0.19  | 0.25   | 0.13  | 4.83   | 12.9   | 0.63  |
| GAIF01034741.1 | 0.26  | 0.12   | 0.04  | 0.21   | 0.09   | 0     |
| GAIF01034742.1 | 7.22  | 15.7   | 5.44  | 4.63   | 7.06   | 0.95  |
| GAIF01034743.1 | 9.95  | 5.48   | 0     | 23.34  | 19.44  | 0.63  |
| GAIF01034744.1 | 0     | 0.12   | 0     | 0.54   | 2.13   | 0.35  |
| GAIF01034746.1 | 0     | 0.05   | 0     | 0.22   | 0.52   | 0     |
| GAIF01034747.1 | 29.29 | 25.15  | 40.32 | 23.52  | 29.33  | 75.26 |
| GAIF01034749.1 | 0     | 0      | 0     | 1.05   | 1.99   | 0     |
| GAIF01034750.1 | 0.11  | 0.08   | 0     | 0.13   | 0.06   | 0     |
| GAIF01034752.1 | 0     | 0      | 0     | 0      | 0.11   | 0     |
| GAIF01034753.1 | 0     | 0      | 0.06  | 0.09   | 0.34   | 0     |
| GAIF01034754.1 | 12.88 | 6.4    | 7.29  | 18.84  | 27.57  | 10.97 |
| GAIF01034755.1 | 0.17  | 1.37   | 0.78  | 0.12   | 0.12   | 0.11  |
| GAIF01034756.1 | 26.24 | 9.13   | 4.13  | 66.66  | 115.72 | 24.35 |
| GAIF01034757.1 | 3.9   | 7.48   | 4.98  | 9.63   | 11.53  | 1.36  |
| GAIF01034758.1 | 0.31  | 0      | 0     | 0      | 0      | 0     |
| GAIF01034760.1 | 0     | 0.17   | 0     | 0      | 0      | 0     |
| GAIF01034762.1 | 0     | 0.23   | 0.08  | 0.16   | 0.5    | 1.6   |
| GAIF01034763.1 | 23.06 | 26.8   | 24.34 | 43.37  | 35.11  | 8.27  |
| GAIF01034764.1 | 7.28  | 5.62   | 2     | 13.9   | 32.49  | 10.35 |
| GAIF01034765.1 | 0.13  | 0.28   | 0.16  | 0.31   | 0      | 0.24  |
| GAIF01034766.1 | 0     | 0      | 0     | 0.22   | 0      | 0     |
| GAIF01034770.1 | 0     | 0.41   | 0.26  | 0      | 0      | 0     |
| GAIF01034772.1 | 1.72  | 3.68   | 4.2   | 14.05  | 13.88  | 1.31  |

|                |         |         |         |        |        |         |
|----------------|---------|---------|---------|--------|--------|---------|
| GAIF01034773.1 | 14.88   | 12.12   | 12.61   | 8.93   | 12.52  | 12.12   |
| GAIF01034774.1 | 0.11    | 0.04    | 0       | 0.96   | 4.03   | 0.32    |
| GAIF01034775.1 | 0       | 0       | 0.06    | 0      | 0.07   | 0       |
| GAIF01034777.1 | 0.53    | 0.34    | 0.1     | 2.96   | 8.71   | 0.08    |
| GAIF01034778.1 | 0.05    | 0       | 0       | 0.11   | 0.49   | 0       |
| GAIF01034779.1 | 10.87   | 9.96    | 2.79    | 46.95  | 56.38  | 8.11    |
| GAIF01034780.1 | 0       | 0       | 0.07    | 0      | 0      | 0       |
| GAIF01034781.1 | 4.16    | 0.29    | 0       | 1.56   | 1.45   | 3.55    |
| GAIF01034782.1 | 0.05    | 0.05    | 0       | 0      | 0      | 0       |
| GAIF01034784.1 | 0       | 0       | 0       | 0.04   | 0.04   | 0       |
| GAIF01034786.1 | 16.55   | 13.17   | 14.6    | 26.75  | 13.86  | 14.33   |
| GAIF01034788.1 | 11.82   | 8.88    | 18.58   | 24.04  | 8.42   | 18.65   |
| GAIF01034789.1 | 0       | 0       | 0       | 0.08   | 0      | 0       |
| GAIF01034791.1 | 0       | 0.03    | 0       | 0.32   | 2.2    | 0       |
| GAIF01034792.1 | 0       | 0       | 0       | 0      | 0.43   | 0.13    |
| GAIF01034794.1 | 1.28    | 1.42    | 2.23    | 3.59   | 1.73   | 1.48    |
| GAIF01034795.1 | 0.58    | 0.21    | 0.24    | 1.84   | 0.93   | 0.52    |
| GAIF01034796.1 | 0       | 0.9     | 1.6     | 2.15   | 0.66   | 0.88    |
| GAIF01034797.1 | 0       | 0.13    | 0.11    | 0.01   | 0.2    | 0       |
| GAIF01034798.1 | 6.91    | 1.48    | 1.86    | 11.76  | 24.64  | 2.87    |
| GAIF01034799.1 | 0       | 0       | 0       | 0.11   | 0.12   | 0       |
| GAIF01034800.1 | 185.65  | 122.97  | 90.36   | 138.51 | 110.3  | 112.68  |
| GAIF01034802.1 | 0       | 0       | 0       | 0.42   | 0      | 0       |
| GAIF01034804.1 | 0.06    | 0       | 0.04    | 0.04   | 0.08   | 0       |
| GAIF01034805.1 | 1.25    | 1.03    | 1.42    | 3.26   | 2.86   | 0.71    |
| GAIF01034806.1 | 29.01   | 11.68   | 6.5     | 78.94  | 64.08  | 21.79   |
| GAIF01034809.1 | 0.15    | 0.16    | 0.49    | 0.17   | 0      | 0       |
| GAIF01034810.1 | 0       | 0.11    | 0       | 0.82   | 2.93   | 0       |
| GAIF01034812.1 | 43.87   | 2.89    | 7.59    | 26.85  | 7.99   | 29.74   |
| GAIF01034813.1 | 73.06   | 57.71   | 16.22   | 126.34 | 122.16 | 26.16   |
| GAIF01034814.1 | 2.25    | 0.72    | 0.29    | 10.29  | 19.73  | 0.87    |
| GAIF01034815.1 | 34.09   | 44.34   | 18.29   | 46.31  | 41.35  | 4.59    |
| GAIF01034816.1 | 0       | 0       | 0       | 0      | 0.1    | 0       |
| GAIF01034817.1 | 2.85    | 2.78    | 2.89    | 5.6    | 3.6    | 5.56    |
| GAIF01034818.1 | 14.08   | 7.55    | 6.07    | 29.33  | 31.19  | 7.59    |
| GAIF01034819.1 | 15.01   | 2.91    | 1.62    | 11.8   | 14.41  | 5.1     |
| GAIF01034821.1 | 2174.45 | 2099.43 | 2875.37 | 1128   | 856.21 | 2709.22 |
| GAIF01034823.1 | 0.59    | 0.41    | 0.04    | 3.26   | 3.43   | 0.02    |
| GAIF01034824.1 | 0       | 0       | 0       | 0      | 0.04   | 0       |
| GAIF01034825.1 | 0.58    | 0.9     | 0.38    | 0.4    | 4.73   | 0.64    |
| GAIF01034828.1 | 0       | 0       | 0       | 0.17   | 0      | 0       |
| GAIF01034829.1 | 0       | 0.56    | 0.9     | 0      | 0      | 0.17    |
| GAIF01034831.1 | 3.22    | 5.15    | 1.47    | 6.33   | 6.45   | 0.39    |
| GAIF01034832.1 | 0       | 0       | 0.08    | 0      | 0.09   | 0       |



|                |        |        |        |        |        |        |
|----------------|--------|--------|--------|--------|--------|--------|
| GAIF01034833.1 | 372.66 | 222.96 | 257.47 | 726.27 | 387.09 | 402.07 |
| GAIF01034834.1 | 54.55  | 40.24  | 48.54  | 17.79  | 16.07  | 15.45  |
| GAIF01034835.1 | 0      | 0.08   | 0      | 0      | 0      | 0      |
| GAIF01034836.1 | 0.27   | 0      | 0      | 0.15   | 0      | 0      |
| GAIF01034837.1 | 1.46   | 1.06   | 0.93   | 0.49   | 0.06   | 0      |
| GAIF01034838.1 | 5.09   | 5.41   | 6.73   | 4.56   | 0.83   | 0.89   |
| GAIF01034839.1 | 19.02  | 9.04   | 7.06   | 3.03   | 0.77   | 0.12   |
| GAIF01034840.1 | 0.07   | 0      | 0.11   | 0.15   | 0.11   | 0      |
| GAIF01034841.1 | 136.93 | 44.17  | 14.87  | 597.14 | 638.38 | 99.98  |
| GAIF01034842.1 | 0      | 0      | 0      | 0      | 0.39   | 0.02   |
| GAIF01034844.1 | 5.47   | 0.33   | 0.66   | 2.14   | 13.66  | 5.45   |
| GAIF01034846.1 | 0.02   | 0.03   | 0.03   | 0.18   | 0.77   | 0.05   |
| GAIF01034848.1 | 52.45  | 57.03  | 43.19  | 33.25  | 138.07 | 58     |
| GAIF01034849.1 | 0      | 0      | 0      | 0.28   | 0.3    | 0      |
| GAIF01034850.1 | 0      | 0.04   | 0      | 0      | 0      | 0      |
| GAIF01034852.1 | 0.06   | 0      | 0      | 0.58   | 2.73   | 0.03   |
| GAIF01034853.1 | 1.59   | 1.73   | 1.62   | 3.13   | 4.28   | 1.49   |
| GAIF01034854.1 | 0      | 0.26   | 0.13   | 0      | 0      | 0      |
| GAIF01034855.1 | 10.47  | 15.73  | 9.03   | 40.63  | 45.81  | 10.66  |
| GAIF01034856.1 | 0      | 0      | 0      | 0      | 0.07   | 0      |
| GAIF01034857.1 | 0.11   | 0.12   | 0.12   | 2.25   | 4.27   | 0.83   |
| GAIF01034858.1 | 0      | 0      | 0      | 0      | 0.06   | 0      |
| GAIF01034859.1 | 60     | 44.87  | 32.36  | 91.56  | 110.11 | 43.44  |
| GAIF01034860.1 | 1      | 0      | 0.7    | 0.13   | 0.09   | 0.48   |
| GAIF01034861.1 | 0      | 0      | 0.12   | 0      | 0      | 0      |
| GAIF01034862.1 | 6.55   | 5.92   | 7.13   | 22.56  | 20.55  | 4.35   |
| GAIF01034863.1 | 0      | 0      | 0.07   | 0.07   | 0.15   | 0      |
| GAIF01034864.1 | 0      | 0      | 0      | 0.59   | 0.7    | 0.11   |
| GAIF01034866.1 | 0.03   | 0.03   | 0.03   | 0.06   | 0.29   | 0      |
| GAIF01034867.1 | 28.57  | 4.65   | 8.2    | 0      | 0      | 0      |
| GAIF01034869.1 | 1.84   | 0.75   | 0.76   | 1.87   | 5.8    | 0.76   |
| GAIF01034870.1 | 5.57   | 6.65   | 8.3    | 25.61  | 28.94  | 3.66   |
| GAIF01034872.1 | 0.81   | 0.09   | 0.09   | 4.06   | 15.85  | 0.28   |
| GAIF01034873.1 | 0.77   | 0      | 0      | 4.33   | 20.16  | 0.57   |
| GAIF01034874.1 | 0      | 0      | 0      | 0      | 0.07   | 0      |
| GAIF01034875.1 | 0      | 0      | 0      | 0.03   | 0.07   | 0      |
| GAIF01034876.1 | 0.1    | 0      | 0      | 0.04   | 0.12   | 0      |
| GAIF01034877.1 | 68.2   | 55.01  | 55.41  | 74.55  | 48.67  | 29.22  |
| GAIF01034878.1 | 0      | 0.07   | 0.07   | 0      | 0      | 0      |
| GAIF01034879.1 | 11.44  | 5.98   | 0.95   | 3.81   | 4.59   | 0.16   |
| GAIF01034880.1 | 0.06   | 0.07   | 0      | 0.29   | 1.91   | 0.07   |
| GAIF01034882.1 | 54.69  | 40.65  | 24.46  | 69.67  | 47.8   | 22.5   |
| GAIF01034883.1 | 25.54  | 21.78  | 19.43  | 81.37  | 47.71  | 33.46  |
| GAIF01034884.1 | 0      | 0      | 0      | 0      | 0.03   | 0      |

|                |        |        |        |        |        |        |
|----------------|--------|--------|--------|--------|--------|--------|
| GAIF01034886.1 | 0      | 0      | 0      | 0      | 0.38   | 0      |
| GAIF01034887.1 | 0      | 0      | 0      | 0      | 0.09   | 0      |
| GAIF01034888.1 | 0.29   | 0.24   | 0.08   | 0.51   | 0.62   | 0.16   |
| GAIF01034890.1 | 454.33 | 407.3  | 313.22 | 400.8  | 306.74 | 182.87 |
| GAIF01034891.1 | 0.13   | 0.14   | 0      | 0.15   | 0.16   | 0.44   |
| GAIF01034894.1 | 0      | 0      | 0      | 0.1    | 0      | 0.34   |
| GAIF01034896.1 | 0      | 0      | 0      | 0      | 0.36   | 0      |
| GAIF01034897.1 | 0.07   | 0      | 0      | 0.01   | 1.96   | 0.07   |
| GAIF01034898.1 | 0.33   | 0.49   | 0.37   | 0.13   | 0.14   | 0      |
| GAIF01034899.1 | 0.05   | 0.28   | 0.46   | 0.12   | 0.16   | 0.31   |
| GAIF01034900.1 | 0.25   | 1.27   | 0.59   | 0.05   | 0      | 0.18   |
| GAIF01034902.1 | 0.18   | 0.13   | 0.07   | 0.21   | 1.13   | 0.02   |
| GAIF01034903.1 | 0      | 0      | 0.03   | 0      | 0      | 0      |
| GAIF01034904.1 | 0.12   | 0.13   | 0      | 0.25   | 0.2    | 0      |
| GAIF01034905.1 | 31.61  | 73.99  | 18.7   | 73.67  | 75.31  | 5.84   |
| GAIF01034908.1 | 0      | 0      | 0.15   | 0      | 0      | 0      |
| GAIF01034910.1 | 0      | 0      | 0.86   | 0      | 0      | 0.37   |
| GAIF01034911.1 | 1.84   | 0.25   | 0      | 0.53   | 0      | 0      |
| GAIF01034914.1 | 26.89  | 31.51  | 36.05  | 37.87  | 30.5   | 10.64  |
| GAIF01034915.1 | 0.07   | 0      | 0      | 0.25   | 1.1    | 0      |
| GAIF01034916.1 | 0      | 0      | 0      | 0      | 0      | 0.07   |
| GAIF01034918.1 | 8.42   | 5.07   | 2.3    | 0.14   | 0.3    | 0.6    |
| GAIF01034919.1 | 0      | 0      | 0      | 0.03   | 0.23   | 0      |
| GAIF01034920.1 | 152.4  | 336.42 | 624.6  | 165.72 | 135.57 | 140.32 |
| GAIF01034922.1 | 0      | 0.2    | 0.2    | 0      | 0      | 0      |
| GAIF01034923.1 | 0      | 0      | 0      | 0      | 0.31   | 0      |
| GAIF01034925.1 | 0.08   | 0.03   | 0      | 0.31   | 1.34   | 0      |
| GAIF01034926.1 | 0      | 0      | 0      | 0      | 0.25   | 0      |
| GAIF01034927.1 | 0      | 0      | 0      | 0.05   | 0.14   | 0      |
| GAIF01034929.1 | 0      | 0.08   | 0      | 0.08   | 0.17   | 0      |
| GAIF01034930.1 | 1.36   | 0.13   | 0.27   | 3.58   | 11     | 0      |
| GAIF01034931.1 | 1.91   | 0.23   | 0.37   | 0.59   | 2.81   | 0.05   |
| GAIF01034932.1 | 1.33   | 0      | 0.37   | 2.42   | 13.16  | 0.98   |
| GAIF01034933.1 | 1.32   | 0.33   | 0.1    | 4.09   | 28.65  | 6.43   |
| GAIF01034934.1 | 11.08  | 4.02   | 4.83   | 17.78  | 7.71   | 4.01   |
| GAIF01034935.1 | 0      | 0      | 0      | 0.13   | 0      | 0      |
| GAIF01034936.1 | 0      | 0      | 0      | 0.11   | 0      | 0      |
| GAIF01034937.1 | 0.11   | 0      | 0      | 0      | 0.33   | 0      |
| GAIF01034938.1 | 4.71   | 2.39   | 3.81   | 6.21   | 13.79  | 3.63   |
| GAIF01034940.1 | 99.95  | 186.95 | 171.4  | 13.87  | 15.2   | 12.04  |
| GAIF01034941.1 | 0.62   | 1.09   | 2.33   | 1.69   | 0.9    | 1.93   |
| GAIF01034942.1 | 0.23   | 0.27   | 0      | 1.18   | 3.06   | 0.56   |
| GAIF01034943.1 | 25.07  | 33.4   | 27.2   | 142.42 | 166.19 | 14.64  |
| GAIF01034944.1 | 0.46   | 0      | 0      | 0      | 1.74   | 0.31   |

|                |       |       |        |        |       |       |
|----------------|-------|-------|--------|--------|-------|-------|
| GAIF01034945.1 | 0     | 0     | 0      | 0      | 0.12  | 0     |
| GAIF01034946.1 | 5.53  | 4.58  | 4.7    | 0      | 0     | 0.52  |
| GAIF01034947.1 | 0.07  | 0     | 0      | 0.26   | 0.63  | 0     |
| GAIF01034948.1 | 0.12  | 0.14  | 0.01   | 0      | 0.19  | 0.29  |
| GAIF01034949.1 | 74.44 | 45.97 | 69.68  | 180.14 | 98.31 | 84.59 |
| GAIF01034950.1 | 0     | 6.89  | 4.3    | 0.08   | 0     | 0.39  |
| GAIF01034951.1 | 8.61  | 5.71  | 4.21   | 0.16   | 2.53  | 1.56  |
| GAIF01034952.1 | 23.51 | 13.27 | 0      | 42.08  | 57.74 | 8.47  |
| GAIF01034953.1 | 0     | 0.14  | 0.14   | 0.15   | 0.76  | 0.14  |
| GAIF01034954.1 | 0     | 0     | 0      | 0.23   | 0.24  | 0     |
| GAIF01034956.1 | 1.1   | 0.73  | 0.1    | 1.3    | 0.68  | 0.16  |
| GAIF01034957.1 | 0     | 0     | 0      | 0      | 0.12  | 0     |
| GAIF01034958.1 | 2.37  | 0.5   | 0.1    | 3.34   | 18.75 | 1.28  |
| GAIF01034959.1 | 37    | 25.65 | 17.24  | 80.68  | 77.33 | 8.41  |
| GAIF01034962.1 | 0     | 0     | 0      | 0      | 0.2   | 0     |
| GAIF01034963.1 | 0.64  | 0.35  | 0.36   | 1.47   | 1.46  | 0.44  |
| GAIF01034965.1 | 4.01  | 3.19  | 3.31   | 1.31   | 7.57  | 1.06  |
| GAIF01034966.1 | 0.23  | 0     | 0      | 0      | 0     | 0     |
| GAIF01034967.1 | 3.05  | 0.64  | 0.21   | 1.43   | 2.03  | 5.37  |
| GAIF01034968.1 | 0     | 0     | 0      | 0.16   | 0     | 0     |
| GAIF01034969.1 | 0.36  | 0     | 0      | 0.17   | 0.86  | 0     |
| GAIF01034970.1 | 0.24  | 0     | 0      | 0      | 0.14  | 0     |
| GAIF01034974.1 | 0     | 0     | 0      | 0.31   | 0.3   | 0     |
| GAIF01034975.1 | 0.5   | 0.04  | 0.13   | 1.68   | 1.48  | 0.51  |
| GAIF01034977.1 | 8.69  | 3.99  | 8.73   | 12.93  | 8.39  | 58.68 |
| GAIF01034979.1 | 4.1   | 0.54  | 2.07   | 0.29   | 0.2   | 0.27  |
| GAIF01034981.1 | 0.51  | 0.14  | 0.14   | 6.43   | 20.59 | 1.32  |
| GAIF01034983.1 | 0     | 0     | 0      | 0.26   | 0.41  | 0     |
| GAIF01034984.1 | 2.44  | 2.88  | 2.98   | 15.5   | 36.45 | 2.47  |
| GAIF01034985.1 | 119   | 85.51 | 148.33 | 282.44 | 12.69 | 82.25 |
| GAIF01034986.1 | 0.22  | 0.05  | 0      | 0.48   | 1.52  | 0.02  |
| GAIF01034989.1 | 0.08  | 0.25  | 0.02   | 0.04   | 0     | 0.02  |
| GAIF01034992.1 | 0.37  | 0     | 0      | 1.29   | 5.65  | 0     |
| GAIF01034994.1 | 0.55  | 0     | 0      | 0      | 1.55  | 0     |
| GAIF01034995.1 | 1.82  | 1.16  | 0.33   | 2.47   | 4.2   | 0     |
| GAIF01034996.1 | 0     | 0     | 0      | 0      | 0.08  | 0     |
| GAIF01034997.1 | 1.11  | 0.59  | 0.94   | 3.31   | 7.52  | 0     |
| GAIF01034998.1 | 0     | 0     | 0.32   | 0.13   | 0     | 0     |
| GAIF01035000.1 | 1.02  | 0.55  | 0.24   | 0.25   | 0.13  | 0     |
| GAIF01035003.1 | 5.74  | 0.79  | 0.11   | 0.61   | 0.88  | 0.81  |
| GAIF01035006.1 | 0.88  | 0.34  | 0.97   | 1.15   | 2.91  | 2.1   |
| GAIF01035008.1 | 0.17  | 0.09  | 0      | 0      | 0     | 0     |
| GAIF01035009.1 | 7.17  | 9.37  | 5.43   | 16.8   | 7.77  | 2.2   |
| GAIF01035010.1 | 1.48  | 2.42  | 0.58   | 9.7    | 12.09 | 0     |

|                |        |        |       |        |        |       |
|----------------|--------|--------|-------|--------|--------|-------|
| GAIF01035011.1 | 21.43  | 13.98  | 3.28  | 10.74  | 17.25  | 1.45  |
| GAIF01035014.1 | 0.04   | 0.15   | 0.03  | 0.19   | 0.15   | 0     |
| GAIF01035015.1 | 38.84  | 33.27  | 18.74 | 10.12  | 8.1    | 5.73  |
| GAIF01035016.1 | 1.1    | 0.24   | 0.32  | 0      | 0.09   | 0     |
| GAIF01035019.1 | 12.15  | 8.51   | 12.34 | 34.37  | 13.4   | 17.48 |
| GAIF01035020.1 | 0      | 0      | 0     | 3.48   | 3.85   | 0     |
| GAIF01035021.1 | 0.89   | 0.18   | 0.08  | 0.69   | 1.88   | 0.86  |
| GAIF01035023.1 | 0      | 0.17   | 0.11  | 0      | 0      | 0     |
| GAIF01035026.1 | 0.09   | 0      | 0.14  | 0.16   | 0.91   | 0.14  |
| GAIF01035028.1 | 35.82  | 40.87  | 32.63 | 23.86  | 14.49  | 5.67  |
| GAIF01035030.1 | 0.03   | 0      | 0.02  | 0      | 0      | 0     |
| GAIF01035032.1 | 9.63   | 18.4   | 12.14 | 28.05  | 13.02  | 5.51  |
| GAIF01035034.1 | 24.47  | 26.39  | 28.93 | 88.3   | 33.47  | 23.49 |
| GAIF01035036.1 | 0.04   | 0.02   | 0     | 0      | 0.03   | 0     |
| GAIF01035037.1 | 0.1    | 0      | 0     | 0      | 0      | 0     |
| GAIF01035039.1 | 0      | 0      | 0     | 0.15   | 0      | 0     |
| GAIF01035041.1 | 0      | 0      | 0     | 0      | 0.43   | 0.15  |
| GAIF01035042.1 | 1.16   | 0.31   | 0.19  | 0.5    | 0.78   | 0     |
| GAIF01035043.1 | 12.94  | 16.23  | 14.56 | 15.73  | 18.82  | 5.35  |
| GAIF01035044.1 | 0.18   | 0      | 0.41  | 0      | 0.67   | 0     |
| GAIF01035045.1 | 0.22   | 0.4    | 0.22  | 1.56   | 1.92   | 0.26  |
| GAIF01035046.1 | 0      | 0      | 0     | 3.26   | 3.22   | 0     |
| GAIF01035049.1 | 0      | 0      | 0     | 0      | 0.16   | 0     |
| GAIF01035050.1 | 6.57   | 3.34   | 9.61  | 16.97  | 7.67   | 43.49 |
| GAIF01035051.1 | 0      | 0.05   | 0     | 0.04   | 0      | 0     |
| GAIF01035052.1 | 0      | 0      | 0     | 0      | 0.42   | 0     |
| GAIF01035053.1 | 0.12   | 0      | 0     | 1.71   | 4.29   | 0.27  |
| GAIF01035054.1 | 22.39  | 32.73  | 22.24 | 94.56  | 135.74 | 8.04  |
| GAIF01035055.1 | 0.31   | 0.08   | 0     | 0.09   | 0      | 0.26  |
| GAIF01035056.1 | 0.12   | 1.23   | 0     | 0      | 0.37   | 0     |
| GAIF01035057.1 | 5.45   | 6.42   | 3.65  | 21.7   | 16.83  | 9.86  |
| GAIF01035058.1 | 0.07   | 0.02   | 0.04  | 0      | 0      | 0     |
| GAIF01035059.1 | 9.89   | 0      | 0     | 35.67  | 29.52  | 7.87  |
| GAIF01035060.1 | 2.4    | 0.77   | 4.17  | 1.49   | 3.1    | 5.78  |
| GAIF01035061.1 | 1.24   | 1.85   | 0.68  | 0.18   | 0      | 0     |
| GAIF01035063.1 | 0.12   | 0      | 0.1   | 0      | 0      | 0.09  |
| GAIF01035064.1 | 2.11   | 4.13   | 0.89  | 0      | 0      | 0     |
| GAIF01035065.1 | 0.09   | 0      | 0     | 0.2    | 0.05   | 0     |
| GAIF01035067.1 | 0      | 0      | 0.08  | 0      | 0      | 0     |
| GAIF01035068.1 | 170.47 | 196.58 | 78.23 | 210.43 | 153.23 | 12.87 |
| GAIF01035069.1 | 0      | 0.12   | 0.06  | 0      | 0      | 0.18  |
| GAIF01035070.1 | 42.92  | 30.51  | 13.6  | 118.29 | 163.3  | 11.02 |
| GAIF01035071.1 | 0.02   | 0.03   | 0.05  | 0.02   | 0.08   | 0.02  |
| GAIF01035072.1 | 0.63   | 0.34   | 0     | 0.36   | 0      | 0     |

|                |       |        |       |        |        |       |
|----------------|-------|--------|-------|--------|--------|-------|
| GAIF01035073.1 | 0     | 0      | 0     | 0.19   | 0.21   | 0.21  |
| GAIF01035075.1 | 0.74  | 2.41   | 0.65  | 8.05   | 9.05   | 0     |
| GAIF01035078.1 | 0.34  | 1.01   | 0.2   | 4.38   | 14.13  | 0.29  |
| GAIF01035080.1 | 0     | 0      | 0     | 0.58   | 3.03   | 0.35  |
| GAIF01035085.1 | 6.43  | 9.98   | 7.74  | 15.65  | 11.04  | 4.69  |
| GAIF01035086.1 | 0     | 0      | 0.1   | 0      | 0.15   | 0     |
| GAIF01035088.1 | 0     | 0      | 0     | 0      | 0.07   | 0     |
| GAIF01035090.1 | 0.21  | 0.12   | 0.23  | 0.87   | 6.48   | 0.23  |
| GAIF01035091.1 | 0.1   | 0.11   | 0.57  | 0      | 1.37   | 0     |
| GAIF01035092.1 | 0.03  | 0      | 0     | 0.03   | 0      | 0     |
| GAIF01035093.1 | 0.67  | 1.06   | 0.36  | 0.41   | 0.41   | 0.18  |
| GAIF01035095.1 | 0     | 0      | 0.07  | 0      | 0      | 0     |
| GAIF01035096.1 | 48.84 | 42.31  | 21.95 | 9.81   | 0      | 0.2   |
| GAIF01035099.1 | 23.93 | 12.99  | 10.79 | 5.86   | 5.3    | 5.57  |
| GAIF01035100.1 | 7.99  | 4.43   | 0     | 38.88  | 104.95 | 0.53  |
| GAIF01035101.1 | 0.15  | 0      | 0     | 0      | 0.18   | 0     |
| GAIF01035102.1 | 0     | 0.41   | 0.15  | 0.04   | 0.04   | 0     |
| GAIF01035103.1 | 9.29  | 5.94   | 0     | 10.79  | 27.15  | 0     |
| GAIF01035104.1 | 0.26  | 0      | 0.09  | 2.03   | 4.9    | 1.78  |
| GAIF01035105.1 | 0     | 0.08   | 0.08  | 0      | 0.06   | 0.03  |
| GAIF01035106.1 | 20.21 | 17     | 10.93 | 59.14  | 46.04  | 33.26 |
| GAIF01035108.1 | 0     | 0      | 0     | 0      | 0.31   | 0     |
| GAIF01035110.1 | 0.53  | 0.46   | 0.08  | 9.43   | 25.77  | 0.19  |
| GAIF01035111.1 | 18.03 | 14.62  | 0.94  | 34.06  | 56.85  | 3.53  |
| GAIF01035112.1 | 83.59 | 76.97  | 59.43 | 140.62 | 95.45  | 22.72 |
| GAIF01035114.1 | 32.01 | 33.58  | 21.61 | 54.51  | 40.99  | 3.97  |
| GAIF01035115.1 | 0     | 0      | 0.02  | 0.01   | 0.02   | 0     |
| GAIF01035116.1 | 2.52  | 0.69   | 0.05  | 0.3    | 0.37   | 0.02  |
| GAIF01035117.1 | 1.21  | 1.27   | 0.34  | 9.43   | 17     | 1.78  |
| GAIF01035119.1 | 0     | 0      | 0     | 0.25   | 0.13   | 0.59  |
| GAIF01035120.1 | 0.04  | 0.05   | 0.05  | 0.64   | 2.29   | 0     |
| GAIF01035121.1 | 86.23 | 138.52 | 64.95 | 19.86  | 20.38  | 7.77  |
| GAIF01035123.1 | 16.92 | 15.61  | 10.33 | 41.39  | 40.87  | 5.63  |
| GAIF01035124.1 | 0     | 0      | 0     | 0.01   | 0      | 0.09  |
| GAIF01035127.1 | 0     | 0      | 0     | 0      | 0.09   | 0     |
| GAIF01035129.1 | 0     | 0      | 0     | 0      | 0.36   | 0     |
| GAIF01035131.1 | 0     | 0.05   | 0.28  | 0      | 0      | 0.32  |
| GAIF01035132.1 | 0     | 0      | 0     | 0.2    | 0.15   | 0     |
| GAIF01035134.1 | 0.04  | 0      | 0     | 0.05   | 0.08   | 0     |
| GAIF01035139.1 | 18.63 | 20.68  | 21.91 | 91.46  | 86.65  | 12.49 |
| GAIF01035142.1 | 66.11 | 94.85  | 42.42 | 35.67  | 18.38  | 6.48  |
| GAIF01035143.1 | 0.89  | 0.86   | 0.99  | 0.9    | 0.53   | 0.32  |
| GAIF01035144.1 | 0     | 0      | 0     | 0.05   | 0      | 0     |
| GAIF01035146.1 | 0     | 0      | 0     | 0.61   | 0.26   | 0     |

|                |         |         |         |         |        |         |
|----------------|---------|---------|---------|---------|--------|---------|
| GAIF01035147.1 | 2.41    | 1.71    | 2.46    | 19.19   | 38.84  | 5.07    |
| GAIF01035148.1 | 2.29    | 1.04    | 0.21    | 14.86   | 48.94  | 1.68    |
| GAIF01035149.1 | 8.83    | 10.01   | 15.49   | 22.83   | 13.03  | 8.34    |
| GAIF01035150.1 | 28.13   | 5.66    | 9.12    | 2.55    | 0.61   | 0.57    |
| GAIF01035151.1 | 0.62    | 0.65    | 0.38    | 1.04    | 0.31   | 0.12    |
| GAIF01035152.1 | 0       | 0.05    | 0       | 0.47    | 2      | 0       |
| GAIF01035153.1 | 0       | 0.14    | 0       | 0.05    | 0.49   | 0       |
| GAIF01035154.1 | 0       | 0       | 0.5     | 0.81    | 0.47   | 0.37    |
| GAIF01035156.1 | 0.09    | 0       | 0.48    | 0.27    | 0.25   | 0.18    |
| GAIF01035157.1 | 0       | 0       | 0       | 0       | 1.48   | 0       |
| GAIF01035158.1 | 0.03    | 0       | 0       | 0       | 0      | 0.03    |
| GAIF01035160.1 | 65.58   | 79.7    | 53.51   | 99.11   | 91.06  | 58.89   |
| GAIF01035161.1 | 0       | 0       | 0       | 0.2     | 0      | 0       |
| GAIF01035162.1 | 0       | 0       | 0       | 0.2     | 0      | 0       |
| GAIF01035163.1 | 4893.71 | 4311.04 | 6189.77 | 2682.09 | 2459.8 | 14775.2 |
| GAIF01035167.1 | 0       | 0       | 0       | 0.12    | 0      | 0       |
| GAIF01035168.1 | 0.07    | 0       | 0       | 0       | 0      | 0.08    |
| GAIF01035169.1 | 0.14    | 0       | 0.15    | 0.16    | 0      | 0       |
| GAIF01035170.1 | 0.6     | 1.54    | 0.26    | 0       | 0.44   | 0       |
| GAIF01035172.1 | 5.99    | 3.72    | 7.87    | 16.26   | 12.47  | 2.47    |
| GAIF01035173.1 | 2.67    | 1.86    | 1.69    | 5.23    | 6.46   | 0.42    |
| GAIF01035174.1 | 0       | 1.75    | 1.4     | 0.32    | 0.67   | 0       |
| GAIF01035176.1 | 7.85    | 7.81    | 0       | 12.81   | 26.77  | 12.48   |
| GAIF01035177.1 | 0.08    | 0       | 0       | 0       | 0      | 0       |
| GAIF01035178.1 | 4.26    | 7.43    | 1.13    | 12.11   | 19.89  | 0.41    |
| GAIF01035179.1 | 36.5    | 29.05   | 11.45   | 47.13   | 40.1   | 7.17    |
| GAIF01035180.1 | 2.47    | 1.2     | 0.32    | 0.81    | 3.17   | 0.12    |
| GAIF01035182.1 | 70.81   | 0.1     | 1.35    | 27.94   | 0.23   | 0.94    |
| GAIF01035183.1 | 0.27    | 0.09    | 0       | 0.1     | 0.21   | 0.17    |
| GAIF01035185.1 | 0.64    | 0       | 0       | 3.79    | 21.98  | 0.3     |
| GAIF01035186.1 | 0.16    | 0.16    | 0.16    | 1.89    | 4.3    | 0.04    |
| GAIF01035188.1 | 28.53   | 0       | 0.94    | 13.02   | 5.49   | 9.85    |
| GAIF01035189.1 | 9.23    | 20.5    | 8.61    | 1.35    | 0.93   | 0.16    |
| GAIF01035191.1 | 0       | 0       | 0       | 0       | 0.3    | 0       |
| GAIF01035192.1 | 7.71    | 12.41   | 10.03   | 14.08   | 11.67  | 1.73    |
| GAIF01035196.1 | 0       | 0       | 0       | 0       | 0.34   | 0       |
| GAIF01035197.1 | 22.21   | 13.81   | 16.51   | 29.49   | 33.53  | 25      |
| GAIF01035198.1 | 0       | 0       | 0       | 0       | 0.37   | 0       |
| GAIF01035199.1 | 0       | 0.17    | 0       | 0       | 2.9    | 0       |
| GAIF01035200.1 | 2.24    | 0.74    | 0.77    | 5.86    | 21.99  | 4.31    |
| GAIF01035201.1 | 0       | 4.72    | 2.99    | 0.08    | 0.16   | 0.69    |
| GAIF01035204.1 | 0       | 0       | 0.04    | 0.07    | 0.1    | 0       |
| GAIF01035205.1 | 0       | 0.62    | 0.56    | 0.15    | 0.15   | 0.35    |
| GAIF01035206.1 | 0       | 0.03    | 0       | 0.49    | 2.25   | 0       |

|                |        |        |        |       |        |       |
|----------------|--------|--------|--------|-------|--------|-------|
| GAIF01035207.1 | 0      | 0      | 0      | 0.03  | 0      | 0.06  |
| GAIF01035208.1 | 0.06   | 0      | 0.15   | 0.2   | 0.31   | 0.04  |
| GAIF01035209.1 | 0.18   | 0      | 0      | 0.87  | 3.4    | 0.1   |
| GAIF01035210.1 | 0      | 0      | 0      | 0.63  | 1.81   | 0     |
| GAIF01035214.1 | 0.28   | 0      | 0      | 0     | 0      | 0     |
| GAIF01035215.1 | 0      | 0      | 0      | 0     | 1.66   | 0     |
| GAIF01035217.1 | 0.32   | 0.05   | 0.14   | 0.73  | 3.12   | 0     |
| GAIF01035218.1 | 0.19   | 0.07   | 0.03   | 0     | 0      | 0     |
| GAIF01035220.1 | 24.21  | 37.45  | 38.61  | 78.13 | 37.51  | 17.52 |
| GAIF01035221.1 | 0.07   | 0      | 0.37   | 0.31  | 0.32   | 0     |
| GAIF01035222.1 | 0.14   | 0.06   | 0.05   | 2.32  | 14.95  | 0.05  |
| GAIF01035224.1 | 0      | 0      | 0      | 0     | 0.15   | 0     |
| GAIF01035225.1 | 8.79   | 4.47   | 10.79  | 13.37 | 5.15   | 6.05  |
| GAIF01035226.1 | 9.85   | 31.58  | 100.99 | 4.98  | 4.63   | 28.96 |
| GAIF01035227.1 | 0.72   | 0.06   | 0      | 0.06  | 0      | 0     |
| GAIF01035228.1 | 7.94   | 1.34   | 1.15   | 97.12 | 313.35 | 4.11  |
| GAIF01035229.1 | 0      | 0.1    | 0      | 0     | 0      | 0     |
| GAIF01035230.1 | 0.87   | 0.8    | 0.15   | 2.56  | 2.41   | 0     |
| GAIF01035231.1 | 0      | 0      | 0      | 0.56  | 0      | 0     |
| GAIF01035232.1 | 0.13   | 0      | 0      | 0     | 1.27   | 0     |
| GAIF01035233.1 | 9.74   | 10.25  | 13.54  | 21.25 | 11.24  | 8.83  |
| GAIF01035234.1 | 2.41   | 1.85   | 2.65   | 5.26  | 3.24   | 0.47  |
| GAIF01035235.1 | 0.09   | 0.13   | 0.07   | 0.18  | 0.11   | 0     |
| GAIF01035238.1 | 0      | 0.14   | 0.14   | 0     | 0      | 0.14  |
| GAIF01035239.1 | 125.81 | 248.54 | 289.69 | 83.98 | 48.03  | 19.57 |
| GAIF01035241.1 | 343.26 | 202.8  | 84.95  | 76.12 | 163.14 | 9.24  |
| GAIF01035242.1 | 0      | 0      | 0      | 0     | 0.07   | 0     |
| GAIF01035244.1 | 15.04  | 17.93  | 9.52   | 35.15 | 41.73  | 11.76 |
| GAIF01035246.1 | 25.03  | 19.35  | 24.46  | 32.07 | 13.57  | 14.99 |
| GAIF01035248.1 | 4.54   | 10.47  | 3.66   | 14.83 | 15.14  | 2.86  |
| GAIF01035252.1 | 0.46   | 0.17   | 0      | 0     | 1.11   | 0.34  |
| GAIF01035253.1 | 0.33   | 0.36   | 0      | 0.38  | 1.18   | 0     |
| GAIF01035255.1 | 1.24   | 1.48   | 0.95   | 5.04  | 9.41   | 1.23  |
| GAIF01035256.1 | 3.47   | 3.02   | 2.83   | 7.33  | 10.74  | 1.64  |
| GAIF01035257.1 | 0.09   | 0.36   | 0.03   | 0.9   | 2.71   | 0     |
| GAIF01035258.1 | 0      | 0      | 0      | 0     | 0.15   | 0     |
| GAIF01035259.1 | 0.24   | 0.18   | 0.09   | 1.27  | 3.01   | 0.04  |
| GAIF01035260.1 | 0.77   | 0.43   | 0      | 6.06  | 19.01  | 0.04  |
| GAIF01035262.1 | 14.71  | 6.34   | 0.59   | 15.28 | 29.46  | 3.11  |
| GAIF01035263.1 | 34.38  | 25.57  | 14.94  | 13.27 | 16.77  | 11.04 |
| GAIF01035266.1 | 15.66  | 18.23  | 26.83  | 64.78 | 73.32  | 11.2  |
| GAIF01035267.1 | 0      | 0      | 0      | 0     | 1.43   | 0     |
| GAIF01035268.1 | 51.34  | 41.5   | 19.44  | 12.53 | 11.67  | 3.29  |
| GAIF01035269.1 | 15.34  | 11.61  | 9.96   | 30.73 | 29.61  | 6.91  |

|                |        |        |        |        |        |         |
|----------------|--------|--------|--------|--------|--------|---------|
| GAIF01035270.1 | 2.32   | 4.19   | 7.24   | 7.53   | 3.68   | 6.28    |
| GAIF01035271.1 | 2.65   | 2.11   | 3.84   | 4.79   | 4.91   | 11.46   |
| GAIF01035272.1 | 0.09   | 0      | 0      | 0      | 0      | 0       |
| GAIF01035275.1 | 0.26   | 0.14   | 0.14   | 0.59   | 0.31   | 0.42    |
| GAIF01035276.1 | 9.68   | 12.93  | 6.23   | 6.85   | 3.66   | 1.07    |
| GAIF01035277.1 | 0.05   | 0      | 0      | 0      | 0      | 0       |
| GAIF01035278.1 | 0      | 0.24   | 0      | 0      | 0.34   | 0       |
| GAIF01035279.1 | 0      | 0      | 0      | 0      | 0.17   | 0       |
| GAIF01035282.1 | 0.58   | 0.32   | 0.16   | 1.68   | 9.25   | 0.48    |
| GAIF01035283.1 | 1.17   | 0.16   | 0      | 0      | 0.18   | 0       |
| GAIF01035284.1 | 0      | 0.07   | 0      | 0      | 0.07   | 0       |
| GAIF01035287.1 | 4.33   | 4.88   | 2.02   | 2.79   | 2.99   | 1.94    |
| GAIF01035288.1 | 0.09   | 0      | 0      | 0      | 0      | 0       |
| GAIF01035289.1 | 0      | 0      | 0      | 0.85   | 3.28   | 0       |
| GAIF01035290.1 | 17.12  | 14.25  | 11.63  | 52.37  | 104.68 | 77.1    |
| GAIF01035292.1 | 9.14   | 6.79   | 0.59   | 19.27  | 75.21  | 0.59    |
| GAIF01035294.1 | 0.08   | 0.05   | 0      | 0.1    | 0.1    | 0       |
| GAIF01035295.1 | 0      | 2.72   | 3.23   | 0      | 0      | 1.08    |
| GAIF01035296.1 | 0      | 0      | 0.05   | 0      | 0      | 0.05    |
| GAIF01035299.1 | 0.1    | 0.02   | 0      | 1.06   | 5.07   | 0.25    |
| GAIF01035300.1 | 330.07 | 63.59  | 106.13 | 313.82 | 113.23 | 1036.04 |
| GAIF01035301.1 | 4.22   | 2.6    | 0      | 0      | 0.26   | 0       |
| GAIF01035303.1 | 50.35  | 43.7   | 49.5   | 55.72  | 31.71  | 10.02   |
| GAIF01035304.1 | 0      | 0      | 0      | 0.14   | 0.57   | 0.13    |
| GAIF01035306.1 | 117.98 | 117.03 | 69.42  | 352.81 | 534.07 | 63      |
| GAIF01035307.1 | 3.61   | 3.02   | 2.86   | 5.21   | 2.92   | 0.6     |
| GAIF01035308.1 | 4.7    | 0.97   | 1.23   | 8.16   | 16.63  | 1.48    |
| GAIF01035309.1 | 0.24   | 0      | 0      | 0.14   | 0.29   | 0       |
| GAIF01035310.1 | 27.17  | 25.7   | 19.25  | 181    | 102.53 | 21.71   |
| GAIF01035311.1 | 2.19   | 3.1    | 0.79   | 10.74  | 11.07  | 0.98    |
| GAIF01035312.1 | 0      | 0.11   | 0.05   | 0.17   | 0.12   | 0       |
| GAIF01035313.1 | 17.28  | 0      | 0      | 0      | 0      | 0       |
| GAIF01035314.1 | 4.92   | 7.96   | 6.94   | 5.96   | 7.5    | 2.28    |
| GAIF01035316.1 | 0      | 0      | 0      | 2.59   | 7.91   | 0.99    |
| GAIF01035317.1 | 0.31   | 0      | 0      | 3.17   | 9.57   | 2.17    |
| GAIF01035319.1 | 0      | 0.05   | 0.05   | 0.11   | 1.13   | 0       |
| GAIF01035320.1 | 0.02   | 0.05   | 0.11   | 0.32   | 1.6    | 0.03    |
| GAIF01035323.1 | 32.41  | 34.58  | 10.41  | 7.8    | 3.42   | 0.28    |
| GAIF01035325.1 | 0      | 0      | 0      | 0.1    | 0.09   | 0       |
| GAIF01035326.1 | 0.15   | 0.08   | 0      | 0.09   | 1.79   | 0       |
| GAIF01035328.1 | 18.26  | 21.16  | 15.41  | 0.21   | 0.07   | 0.13    |
| GAIF01035329.1 | 33.54  | 51.64  | 46.05  | 41.82  | 41.13  | 8.44    |
| GAIF01035330.1 | 0      | 14.58  | 0      | 0      | 29.26  | 70.29   |
| GAIF01035332.1 | 0.07   | 0.08   | 0      | 0.68   | 2.02   | 0.16    |



|                |        |        |        |        |        |        |
|----------------|--------|--------|--------|--------|--------|--------|
| GAIF01035333.1 | 129.12 | 113.06 | 117.03 | 325.55 | 213.87 | 111.27 |
| GAIF01035334.1 | 0      | 0      | 0      | 0.38   | 0      | 0      |
| GAIF01035335.1 | 8.13   | 13.26  | 10.24  | 20.41  | 10.79  | 4.35   |
| GAIF01035336.1 | 46.97  | 96.03  | 95.88  | 83.6   | 66.22  | 13.38  |
| GAIF01035337.1 | 0.16   | 0.06   | 0      | 2.64   | 6.67   | 1.81   |
| GAIF01035338.1 | 120.67 | 267.91 | 58.41  | 93.94  | 22.04  | 36.59  |
| GAIF01035339.1 | 60     | 22.6   | 11.38  | 143.2  | 131.06 | 6.05   |
| GAIF01035340.1 | 37.46  | 24.44  | 49.35  | 86.96  | 63.07  | 148.63 |
| GAIF01035341.1 | 0.13   | 0.09   | 0.06   | 0.28   | 1.6    | 0.12   |
| GAIF01035342.1 | 2.86   | 3.07   | 1.72   | 2.94   | 3.06   | 0      |
| GAIF01035343.1 | 0      | 0      | 0      | 0.07   | 0      | 0      |
| GAIF01035344.1 | 0.93   | 0.46   | 0      | 0.88   | 2.54   | 0      |
| GAIF01035345.1 | 24.13  | 19.64  | 11.79  | 40.85  | 46.39  | 4.86   |
| GAIF01035346.1 | 21.67  | 23.56  | 15.54  | 43.74  | 47.95  | 8.53   |
| GAIF01035347.1 | 0      | 0      | 0      | 0      | 0.18   | 0      |
| GAIF01035349.1 | 9.4    | 3.82   | 0      | 31.72  | 40.59  | 5.41   |
| GAIF01035351.1 | 0.17   | 0      | 0      | 0      | 0      | 0      |
| GAIF01035352.1 | 0      | 0      | 0      | 0.89   | 2.3    | 0      |
| GAIF01035353.1 | 0      | 0      | 0      | 0.29   | 0.24   | 0      |
| GAIF01035354.1 | 0.75   | 0.68   | 0.9    | 1.97   | 1.28   | 0.69   |
| GAIF01035356.1 | 14.06  | 25.61  | 11.73  | 35.07  | 20.53  | 2.41   |
| GAIF01035357.1 | 0.18   | 0      | 0.1    | 0.72   | 3.32   | 0      |
| GAIF01035358.1 | 108.5  | 529.73 | 254.66 | 55.88  | 131.45 | 18.36  |
| GAIF01035359.1 | 0      | 0      | 0      | 0.19   | 0      | 0      |
| GAIF01035360.1 | 124.15 | 24.95  | 79.63  | 290.54 | 219.17 | 738.47 |
| GAIF01035362.1 | 82.04  | 264.79 | 195.61 | 41.12  | 54.97  | 44.46  |
| GAIF01035363.1 | 0.23   | 0.33   | 0.28   | 0.6    | 0.47   | 0      |
| GAIF01035364.1 | 0      | 0      | 0      | 0      | 0.08   | 0      |
| GAIF01035366.1 | 0      | 0.1    | 0      | 0.12   | 0.27   | 0      |
| GAIF01035367.1 | 0      | 0.03   | 0.03   | 0.03   | 0.07   | 0.03   |
| GAIF01035368.1 | 39.91  | 43.87  | 65.68  | 42.37  | 28.78  | 24.26  |
| GAIF01035370.1 | 0      | 0.09   | 0      | 0.01   | 0.16   | 0      |
| GAIF01035371.1 | 37.69  | 51.95  | 66.04  | 36.84  | 22.52  | 10.23  |
| GAIF01035372.1 | 0      | 0      | 0      | 0      | 0.19   | 0      |
| GAIF01035373.1 | 0      | 0      | 0.14   | 0      | 0      | 0      |
| GAIF01035374.1 | 0      | 0      | 0      | 0.18   | 1.57   | 0      |
| GAIF01035376.1 | 0      | 0      | 0      | 0.79   | 2.05   | 0.19   |
| GAIF01035378.1 | 2.41   | 0      | 0      | 4.44   | 11     | 30.3   |
| GAIF01035379.1 | 45.55  | 37.21  | 50.35  | 22.54  | 10.66  | 11.21  |
| GAIF01035381.1 | 0      | 0      | 0      | 0      | 0.67   | 0      |
| GAIF01035383.1 | 0.6    | 0      | 0      | 1.14   | 6.98   | 1.99   |
| GAIF01035384.1 | 3.74   | 3.34   | 2.42   | 11.31  | 8.99   | 10.15  |
| GAIF01035385.1 | 17.25  | 10.01  | 21.77  | 29.77  | 13.44  | 21.71  |
| GAIF01035386.1 | 2.97   | 2.3    | 1.99   | 11.47  | 6.73   | 0.74   |

|                |        |        |        |        |         |          |
|----------------|--------|--------|--------|--------|---------|----------|
| GAIF01035387.1 | 0      | 0.34   | 0      | 0.36   | 3.01    | 0        |
| GAIF01035388.1 | 0.91   | 0.5    | 0.5    | 0.71   | 0       | 0.17     |
| GAIF01035389.1 | 0      | 0      | 0      | 0.16   | 0.96    | 0.04     |
| GAIF01035390.1 | 0.6    | 0      | 0      | 0      | 0       | 0        |
| GAIF01035391.1 | 0.15   | 0.08   | 0.08   | 0.09   | 0.53    | 0        |
| GAIF01035392.1 | 0      | 0      | 0      | 0.35   | 0.82    | 0        |
| GAIF01035393.1 | 0.02   | 0.08   | 0.03   | 0.06   | 0.09    | 0.03     |
| GAIF01035395.1 | 13.44  | 14.17  | 15.85  | 43.46  | 18.76   | 12.23    |
| GAIF01035396.1 | 2.87   | 2.21   | 0.65   | 6.73   | 10.99   | 4.3      |
| GAIF01035397.1 | 26.31  | 28.02  | 16.01  | 3.98   | 1.22    | 0.3      |
| GAIF01035398.1 | 1186.5 | 406.25 | 579.05 | 918.88 | 1014.63 | 10021.76 |
| GAIF01035400.1 | 0      | 0      | 0      | 0      | 0.12    | 0        |
| GAIF01035401.1 | 2.27   | 3.27   | 1.13   | 10.78  | 9.59    | 2.76     |
| GAIF01035402.1 | 0      | 0.42   | 0      | 0      | 0       | 0        |
| GAIF01035403.1 | 0      | 0      | 0      | 0.59   | 2.92    | 0.42     |
| GAIF01035405.1 | 0      | 0      | 0      | 0.14   | 0.24    | 0        |
| GAIF01035407.1 | 0      | 0      | 0      | 0.04   | 1.36    | 0        |
| GAIF01035408.1 | 4.45   | 5.68   | 4.95   | 12.95  | 12.71   | 2.62     |
| GAIF01035409.1 | 0      | 0      | 0      | 0      | 0.11    | 0        |
| GAIF01035410.1 | 1.56   | 0.53   | 0.22   | 1.34   | 0.85    | 1.08     |
| GAIF01035411.1 | 0.55   | 0.1    | 0      | 1.6    | 4.3     | 0        |
| GAIF01035413.1 | 0.04   | 0      | 0      | 0      | 0.05    | 0        |
| GAIF01035414.1 | 0      | 0      | 0      | 0      | 0.2     | 0        |
| GAIF01035415.1 | 0      | 0      | 0.05   | 0.05   | 0       | 0        |
| GAIF01035416.1 | 0      | 0      | 0      | 0      | 0.36    | 0        |
| GAIF01035418.1 | 0      | 0      | 0      | 0.1    | 0.11    | 0        |
| GAIF01035419.1 | 0.96   | 0.81   | 1.55   | 0      | 0       | 0        |
| GAIF01035420.1 | 116.45 | 52.43  | 45.43  | 131.46 | 89.86   | 88.67    |
| GAIF01035421.1 | 0.49   | 0.27   | 0      | 4.01   | 10.23   | 0.41     |
| GAIF01035422.1 | 10.17  | 5.27   | 6.38   | 14.95  | 15.14   | 4.7      |
| GAIF01035423.1 | 0      | 0.08   | 0      | 0      | 0       | 0        |
| GAIF01035425.1 | 3.08   | 1.67   | 0.66   | 9.49   | 3.34    | 1.94     |
| GAIF01035426.1 | 0.48   | 0.26   | 0.26   | 6.12   | 24.08   | 0        |
| GAIF01035429.1 | 0.79   | 0.74   | 0      | 4.87   | 12.78   | 0        |
| GAIF01035430.1 | 0.53   | 0      | 0      | 0.61   | 2.53    | 0        |
| GAIF01035431.1 | 0      | 0      | 0      | 0.03   | 0.06    | 0        |
| GAIF01035432.1 | 0.7    | 0.18   | 0.06   | 0.46   | 1.49    | 0.12     |
| GAIF01035433.1 | 8      | 14.16  | 5.24   | 53.84  | 56.76   | 1.97     |
| GAIF01035435.1 | 0.47   | 0.13   | 0      | 0      | 0.07    | 0        |
| GAIF01035438.1 | 0      | 16.76  | 9.77   | 0      | 0       | 0.33     |
| GAIF01035439.1 | 9.84   | 3.1    | 0      | 2.99   | 4.06    | 1.47     |
| GAIF01035440.1 | 6.21   | 3.67   | 2.34   | 48.41  | 6.4     | 9.78     |
| GAIF01035441.1 | 1.18   | 0.11   | 0      | 0.23   | 0       | 0        |
| GAIF01035442.1 | 0      | 0      | 0.9    | 0.26   | 0       | 0.1      |

|                |        |       |       |        |       |       |
|----------------|--------|-------|-------|--------|-------|-------|
| GAIF01035443.1 | 0      | 0     | 0     | 0      | 1.44  | 0     |
| GAIF01035444.1 | 0      | 0.14  | 0.29  | 0.1    | 0.07  | 0.07  |
| GAIF01035446.1 | 0      | 0.04  | 0     | 0      | 0     | 0     |
| GAIF01035448.1 | 0.67   | 0.14  | 0.14  | 4.79   | 12.8  | 0.65  |
| GAIF01035449.1 | 0      | 0     | 0     | 0.13   | 0.53  | 0     |
| GAIF01035450.1 | 2.55   | 1.68  | 0.1   | 17.95  | 50.98 | 0.3   |
| GAIF01035452.1 | 0.23   | 0     | 0     | 0.52   | 8.43  | 0     |
| GAIF01035453.1 | 0.04   | 0.01  | 0.02  | 0.01   | 0     | 0.03  |
| GAIF01035455.1 | 0      | 0     | 0     | 0      | 0.26  | 0     |
| GAIF01035458.1 | 0.13   | 0     | 0     | 0      | 0     | 0     |
| GAIF01035460.1 | 0.5    | 0.34  | 0.25  | 1.36   | 9.56  | 0.61  |
| GAIF01035462.1 | 0.98   | 0.07  | 0     | 0.08   | 0.25  | 0.1   |
| GAIF01035463.1 | 80.98  | 59.44 | 71.6  | 137.07 | 53.94 | 28.77 |
| GAIF01035464.1 | 4.29   | 9.6   | 6.46  | 8.17   | 8.54  | 0.56  |
| GAIF01035465.1 | 9.78   | 9.4   | 4.41  | 3.58   | 1.36  | 0.23  |
| GAIF01035466.1 | 0      | 0     | 0     | 0      | 0     | 0.44  |
| GAIF01035468.1 | 0      | 0     | 0.46  | 1.66   | 0     | 0     |
| GAIF01035470.1 | 3.32   | 1.83  | 1.67  | 5.61   | 4.6   | 8.62  |
| GAIF01035471.1 | 0.27   | 0     | 0     | 0.31   | 0.65  | 0     |
| GAIF01035472.1 | 0.02   | 0.01  | 0     | 0      | 0     | 0.04  |
| GAIF01035473.1 | 101.45 | 36.76 | 48.06 | 61.62  | 12.28 | 46.25 |
| GAIF01035474.1 | 7.04   | 8.15  | 10.09 | 22.62  | 16.15 | 6.11  |
| GAIF01035479.1 | 22.21  | 14.56 | 20.77 | 17.76  | 10.54 | 6.32  |
| GAIF01035480.1 | 0      | 0     | 0     | 0.07   | 0.15  | 0     |
| GAIF01035483.1 | 0.03   | 0     | 0     | 0.09   | 0     | 0     |
| GAIF01035484.1 | 5.94   | 4.31  | 2.51  | 3.62   | 9.34  | 7.98  |
| GAIF01035486.1 | 0      | 0.4   | 0.49  | 0.09   | 0     | 0.24  |
| GAIF01035489.1 | 0.84   | 0.27  | 0.72  | 1.71   | 0.71  | 0.41  |
| GAIF01035490.1 | 0      | 0     | 0.13  | 2.42   | 7.99  | 0     |
| GAIF01035491.1 | 0      | 6.33  | 6.39  | 0      | 0     | 0     |
| GAIF01035492.1 | 6.76   | 10.6  | 4.97  | 12.58  | 4.77  | 1.99  |
| GAIF01035494.1 | 0.51   | 0     | 0.37  | 1.26   | 0     | 0.06  |
| GAIF01035495.1 | 1.18   | 0.3   | 0.4   | 2.54   | 10.63 | 23.2  |
| GAIF01035496.1 | 0.51   | 0.2   | 0     | 1.88   | 3.79  | 0     |
| GAIF01035498.1 | 1.07   | 2.06  | 0.54  | 0.56   | 0.95  | 0     |
| GAIF01035499.1 | 0.39   | 0     | 0.14  | 0.08   | 1.02  | 0     |
| GAIF01035500.1 | 0      | 0     | 0     | 0.14   | 1.57  | 0     |
| GAIF01035501.1 | 15.21  | 27.67 | 8.63  | 96.3   | 60.43 | 5.4   |
| GAIF01035502.1 | 0      | 0     | 0     | 0.05   | 0.11  | 0     |
| GAIF01035503.1 | 21.93  | 26.78 | 10.4  | 14.61  | 17.25 | 1.04  |
| GAIF01035504.1 | 0.05   | 0.12  | 0.12  | 0.75   | 3.35  | 0     |
| GAIF01035506.1 | 18.98  | 9.58  | 4.69  | 0.52   | 1.61  | 0.16  |
| GAIF01035507.1 | 0.06   | 0     | 0     | 0.07   | 0     | 0     |
| GAIF01035508.1 | 0.89   | 1.09  | 0.22  | 8.18   | 12.4  | 0.36  |

|                |        |        |        |        |         |        |
|----------------|--------|--------|--------|--------|---------|--------|
| GAIF01035509.1 | 2.98   | 7.22   | 6.36   | 7.08   | 4       | 0      |
| GAIF01035510.1 | 0      | 0      | 0      | 0.08   | 1.98    | 0      |
| GAIF01035511.1 | 0.46   | 0.2    | 0.3    | 1.17   | 1.33    | 0.1    |
| GAIF01035512.1 | 11.59  | 19.42  | 26.92  | 42.92  | 35.64   | 14.47  |
| GAIF01035514.1 | 51.73  | 12.7   | 5.52   | 42.94  | 67.08   | 18.54  |
| GAIF01035515.1 | 13.15  | 5.61   | 8.73   | 28.09  | 24.18   | 33.13  |
| GAIF01035516.1 | 0.21   | 0.22   | 0.11   | 0.24   | 0.25    | 0      |
| GAIF01035517.1 | 87.31  | 70.88  | 41.16  | 86.4   | 64.67   | 21.51  |
| GAIF01035518.1 | 0.14   | 0.11   | 0      | 0.15   | 2.15    | 0      |
| GAIF01035519.1 | 3.36   | 3.66   | 8.18   | 8.93   | 2.78    | 4.27   |
| GAIF01035520.1 | 0.28   | 0.2    | 0.31   | 0      | 0       | 0      |
| GAIF01035521.1 | 16.3   | 18.58  | 18.23  | 16.75  | 15.15   | 8.07   |
| GAIF01035522.1 | 0      | 0.11   | 0.33   | 1.39   | 5.65    | 0.44   |
| GAIF01035523.1 | 0.39   | 0.21   | 0      | 0.68   | 3.69    | 0.05   |
| GAIF01035525.1 | 2.38   | 0.69   | 1.04   | 2.85   | 3.43    | 1.49   |
| GAIF01035526.1 | 22.75  | 55.07  | 21.92  | 82.18  | 170.84  | 21.53  |
| GAIF01035527.1 | 0      | 0.09   | 0      | 0.19   | 0       | 0      |
| GAIF01035529.1 | 20.79  | 25.87  | 26.79  | 34.39  | 30.97   | 11.38  |
| GAIF01035530.1 | 50.52  | 73.67  | 75.29  | 64.68  | 50.64   | 23.77  |
| GAIF01035531.1 | 15.26  | 13.34  | 20.21  | 47.41  | 40.49   | 139.51 |
| GAIF01035532.1 | 0.12   | 0.13   | 0.19   | 0.34   | 0.14    | 0.13   |
| GAIF01035533.1 | 0.51   | 0.75   | 0.09   | 0.8    | 0.31    | 0.38   |
| GAIF01035535.1 | 29.98  | 14.62  | 14.63  | 48.47  | 42.84   | 17.2   |
| GAIF01035536.1 | 0.09   | 0.02   | 0      | 0.02   | 0       | 0.01   |
| GAIF01035537.1 | 24.78  | 25.25  | 13.11  | 102.26 | 116.05  | 5.69   |
| GAIF01035539.1 | 14.25  | 11.61  | 13.99  | 28.68  | 16.39   | 10.22  |
| GAIF01035540.1 | 0      | 0.16   | 0.48   | 4.5    | 4.74    | 0.48   |
| GAIF01035542.1 | 3.78   | 1.36   | 1.53   | 3.62   | 1.99    | 0.69   |
| GAIF01035545.1 | 0.06   | 0.07   | 0      | 0.18   | 0.79    | 0      |
| GAIF01035546.1 | 0      | 0      | 0      | 0.14   | 0       | 0      |
| GAIF01035547.1 | 3.54   | 0.28   | 0      | 7.27   | 22.45   | 0      |
| GAIF01035548.1 | 0      | 0      | 0      | 0      | 0       | 0.02   |
| GAIF01035550.1 | 0      | 0      | 0      | 0.14   | 0.87    | 0      |
| GAIF01035551.1 | 0.09   | 0      | 0.19   | 0.12   | 0.31    | 0.07   |
| GAIF01035552.1 | 20.29  | 10.36  | 8.85   | 57.9   | 70.05   | 18.05  |
| GAIF01035553.1 | 891.99 | 147.8  | 19.97  | 2156   | 1423.32 | 50.57  |
| GAIF01035554.1 | 0      | 0      | 0      | 0      | 0       | 0.31   |
| GAIF01035555.1 | 3.48   | 0.73   | 0      | 13.68  | 21.91   | 0.89   |
| GAIF01035556.1 | 0      | 0      | 0      | 0      | 0.28    | 0      |
| GAIF01035557.1 | 142.26 | 151.97 | 162.37 | 96.42  | 147.58  | 216.5  |
| GAIF01035558.1 | 0.35   | 0      | 0      | 0.4    | 2.63    | 0      |
| GAIF01035560.1 | 0      | 0      | 0      | 0.91   | 0       | 0      |
| GAIF01035561.1 | 0.03   | 0      | 0.31   | 0      | 0       | 0      |
| GAIF01035562.1 | 0.28   | 0.23   | 0.56   | 2.74   | 0.42    | 0.64   |

|                |        |        |        |        |        |       |
|----------------|--------|--------|--------|--------|--------|-------|
| GAIF01035563.1 | 0      | 0      | 0      | 0.13   | 0      | 0     |
| GAIF01035565.1 | 151.13 | 0      | 73.07  | 11.01  | 0      | 0     |
| GAIF01035566.1 | 0      | 0      | 0      | 0      | 0.18   | 0     |
| GAIF01035567.1 | 0      | 0.12   | 0      | 0      | 0      | 0     |
| GAIF01035568.1 | 0.27   | 0.37   | 0      | 0.6    | 0.37   | 0     |
| GAIF01035569.1 | 0.73   | 0.69   | 0.45   | 0.71   | 1.1    | 0.79  |
| GAIF01035570.1 | 28.14  | 25.76  | 20.61  | 38.24  | 35.92  | 12.63 |
| GAIF01035571.1 | 0      | 0.15   | 0.22   | 0.08   | 1.15   | 0     |
| GAIF01035572.1 | 0      | 0.01   | 0.09   | 0.04   | 0.09   | 0     |
| GAIF01035574.1 | 14.11  | 16.74  | 7.29   | 55.08  | 64     | 4.82  |
| GAIF01035575.1 | 0.9    | 0.37   | 0.09   | 0      | 0.36   | 0     |
| GAIF01035576.1 | 2.17   | 1.26   | 2.47   | 4.29   | 11.59  | 8.95  |
| GAIF01035577.1 | 0      | 0      | 0      | 0      | 20.77  | 0     |
| GAIF01035579.1 | 1.9    | 2.35   | 3.23   | 0.3    | 0.16   | 0.29  |
| GAIF01035580.1 | 0      | 0      | 0      | 0.2    | 0.69   | 0     |
| GAIF01035581.1 | 0.11   | 0.11   | 0      | 1.13   | 2.36   | 0.03  |
| GAIF01035582.1 | 14.97  | 7.79   | 11.33  | 4.55   | 2.04   | 5.75  |
| GAIF01035583.1 | 0.98   | 0.3    | 0      | 2.75   | 16.82  | 7.4   |
| GAIF01035585.1 | 5.53   | 5.7    | 2.88   | 0.6    | 2.23   | 0     |
| GAIF01035586.1 | 0      | 0      | 0      | 0      | 0.08   | 0     |
| GAIF01035587.1 | 0      | 0.21   | 0.43   | 0.33   | 2.37   | 0.32  |
| GAIF01035588.1 | 0      | 0      | 0      | 0      | 0      | 0.03  |
| GAIF01035589.1 | 0.24   | 0.05   | 0.21   | 1.35   | 7.65   | 0.21  |
| GAIF01035590.1 | 0.05   | 0      | 0      | 0      | 0      | 0     |
| GAIF01035591.1 | 0.8    | 0.68   | 0.68   | 0.21   | 0.11   | 0.29  |
| GAIF01035592.1 | 0.09   | 0      | 0.05   | 0.14   | 0.36   | 0     |
| GAIF01035595.1 | 0.02   | 0.02   | 0      | 0.02   | 0.03   | 0     |
| GAIF01035596.1 | 0.81   | 1.87   | 0.25   | 3.61   | 2.81   | 0     |
| GAIF01035597.1 | 13.77  | 8.14   | 7.78   | 18.95  | 24.98  | 18.44 |
| GAIF01035598.1 | 0.18   | 0      | 0      | 0.42   | 0      | 0     |
| GAIF01035599.1 | 5.2    | 7.03   | 0.7    | 4.27   | 2.14   | 0     |
| GAIF01035600.1 | 3.05   | 2.27   | 1.85   | 0.37   | 0.1    | 0     |
| GAIF01035602.1 | 0      | 0      | 0      | 0.09   | 0.28   | 0     |
| GAIF01035605.1 | 0      | 0.06   | 0      | 0      | 0      | 0     |
| GAIF01035606.1 | 0      | 0      | 0.18   | 0.19   | 0.4    | 0.18  |
| GAIF01035607.1 | 0      | 0      | 0      | 0      | 0.01   | 0     |
| GAIF01035608.1 | 38.84  | 40.68  | 40.16  | 108.54 | 70.47  | 29.89 |
| GAIF01035609.1 | 13.58  | 5.27   | 8.3    | 21.72  | 39.14  | 40.88 |
| GAIF01035610.1 | 0      | 0.98   | 0      | 7.21   | 1.09   | 2.96  |
| GAIF01035611.1 | 104.36 | 137.29 | 196.24 | 246.97 | 196.84 | 41.75 |
| GAIF01035613.1 | 0.39   | 0.14   | 0      | 0      | 0.26   | 0     |
| GAIF01035614.1 | 0      | 0      | 0.05   | 0.48   | 0      | 0     |
| GAIF01035615.1 | 5.81   | 5.86   | 5.35   | 0.02   | 0.39   | 0     |
| GAIF01035616.1 | 0      | 0.06   | 0      | 0.06   | 0.38   | 0     |

|                |        |        |        |        |        |        |
|----------------|--------|--------|--------|--------|--------|--------|
| GAIF01035618.1 | 0      | 0      | 0.11   | 0      | 0      | 0      |
| GAIF01035619.1 | 16.01  | 21.28  | 22.17  | 12.59  | 14.67  | 7.12   |
| GAIF01035620.1 | 0.08   | 0.09   | 0      | 0      | 0.2    | 0      |
| GAIF01035621.1 | 222.96 | 255.73 | 350.25 | 337.83 | 358.38 | 921.81 |
| GAIF01035622.1 | 0.12   | 0      | 0      | 0.14   | 0.44   | 0      |
| GAIF01035623.1 | 42.02  | 0.43   | 4.97   | 31.56  | 12.59  | 8.46   |
| GAIF01035626.1 | 0      | 0.07   | 0      | 0      | 0      | 0      |
| GAIF01035627.1 | 0      | 0      | 0      | 0      | 0.55   | 0      |
| GAIF01035630.1 | 4.44   | 6.3    | 4.98   | 11.54  | 7.78   | 2.77   |
| GAIF01035631.1 | 2.53   | 0.65   | 0.61   | 9.2    | 36.52  | 17.63  |
| GAIF01035632.1 | 0      | 0      | 0      | 0.09   | 0      | 0      |
| GAIF01035633.1 | 0.79   | 0      | 0      | 2.88   | 7.05   | 0.5    |
| GAIF01035634.1 | 0.12   | 0.32   | 0      | 0.41   | 0.07   | 0.32   |
| GAIF01035635.1 | 0      | 1.38   | 0.56   | 0.88   | 2.14   | 0.42   |
| GAIF01035636.1 | 0.4    | 0.11   | 0.11   | 0.35   | 1.14   | 2.26   |
| GAIF01035637.1 | 0      | 0.32   | 0.11   | 0.68   | 0.7    | 0      |
| GAIF01035638.1 | 0      | 0.05   | 0      | 0      | 0      | 0      |
| GAIF01035641.1 | 36.24  | 69.6   | 80.47  | 253.79 | 142.29 | 28.48  |
| GAIF01035642.1 | 8.5    | 4.67   | 4.52   | 2.64   | 0.53   | 1.06   |
| GAIF01035644.1 | 0      | 0.09   | 0      | 0.2    | 0.2    | 0      |
| GAIF01035645.1 | 0      | 0      | 0      | 0.36   | 2.27   | 0      |
| GAIF01035646.1 | 0.86   | 0.76   | 0.47   | 4.18   | 10.85  | 0.71   |
| GAIF01035647.1 | 0.52   | 0.22   | 0.05   | 1.75   | 15.34  | 1.57   |
| GAIF01035648.1 | 0.23   | 0.15   | 0.18   | 0.14   | 0.22   | 0      |
| GAIF01035649.1 | 0.16   | 0      | 0.52   | 0      | 0      | 0.35   |
| GAIF01035650.1 | 34.88  | 23.17  | 42.75  | 64.04  | 23.64  | 39.56  |
| GAIF01035651.1 | 24.89  | 13.94  | 16.29  | 27.87  | 18.09  | 41.93  |
| GAIF01035653.1 | 11.86  | 5.56   | 5.48   | 36.26  | 53.02  | 12.19  |
| GAIF01035655.1 | 40.81  | 70.82  | 97.38  | 105.28 | 98.31  | 31.96  |
| GAIF01035656.1 | 1.69   | 0.44   | 0.08   | 3.04   | 9.33   | 7.13   |
| GAIF01035658.1 | 0.14   | 0      | 0      | 0.64   | 8.41   | 0      |
| GAIF01035660.1 | 0      | 0      | 0      | 0      | 1.17   | 0      |
| GAIF01035661.1 | 5.82   | 2.62   | 0.22   | 8.85   | 27.5   | 4.64   |
| GAIF01035662.1 | 14.02  | 13.26  | 8.42   | 37.63  | 28.41  | 2.82   |
| GAIF01035663.1 | 0.28   | 0.67   | 0      | 0.4    | 0      | 0.17   |
| GAIF01035666.1 | 0      | 0.35   | 0      | 0      | 0.13   | 0      |
| GAIF01035667.1 | 0.36   | 0.06   | 0.06   | 2.48   | 13.54  | 0.39   |
| GAIF01035668.1 | 4.58   | 10.43  | 2.99   | 16.21  | 23.77  | 0.64   |
| GAIF01035669.1 | 8.75   | 4.79   | 10.12  | 25.73  | 12.29  | 22.81  |
| GAIF01035670.1 | 0.01   | 0      | 0      | 0.27   | 0.92   | 0      |
| GAIF01035671.1 | 7.16   | 4.97   | 3.97   | 0.95   | 0.49   | 0.15   |
